# Supplementary material for: Somatic retrotransposition in the developing rhesus macaque brain
Source: HighWire-hosted journal article supplement (doi:10.1101/gr.276451.121), 2022-06-21
Supplement: Supplemental_File_S1.zip [file L1RS2eGFPI_RTSNvector.docx]

GGAATGGTTTATGGTTCGTGGGGGTTATTATTTTGGGCGTTGCGTGGGGTCAGGTCCACGACTGGACTGAGCAGACAGACCCATGGTTTTTGGATGGCCTGGGCATGGACCGCATGTACTGGCGCGACACGAACACCGGGCGTCTGTGGCTGCCAAACACCCCCGACCCCCAAAAACCACCGCGCGGATTTCTGGCGTGCCAAGCTAGTCGACCAATTCTCATGTTTGACAGCTTATCATCGCAGATCCGGGCAACGTTGTTGCCATTGCTGCAGGCGCAGAACTGGTAGGTATGGAAGATCTCTAGAAGCTGGGTACCAGCTGCTAGCAAGCTTGCTAGCGGCCGCTGATAATATAGCCCATAATAGAGAGgggggcggagcaagatggccgaataggagcagctccagtctccaactcccagcgccagcgacacagaagaccggtgatttctgcattttcaactgaggtactgggttcatctcactggggagtgccggacgatcggtgctggtcagctgctgcagcccgaccagcgagagctgaagcagggcgaggcattgcctcacctgggaagcgcaagggggaagggagtcccttttcctagccaggggaactgagacacacaacacctggaaaatcgggtaactcccaccccaatactgcgctttaggaaacaggcacaccaggagatcatatcccacacctggccgggagggtcccacacccacggagcctccctcgttgctagcgcagcagtctgtgatctaccggcaaggcagcagcgaggctgggggaggggcgcccgccattgctgaggcttaagtaggtaaacaaagctgctgggaagctcgaactgggtggagctcacagcagctcaaggaaacctgcctgtctctgtagactccacctctggggacagggcacagtaaactaagacacacagacacctctgcacagacgcaaacgactctgtctgacagctttgaagagagcagtggatctcccaacacggaggttgagatctgagaagggacagactccctgctcaagcgggtccctgacccctgagtagcctaactgggagacatcccccactaggggcagtctgacaccccacacctcacagggaggagtacacccctgagaggaagcttccaaagcaagaatcagacaggtacactcgctgttcagaaatattctatcttctgcagcctctgctgctgatacccaggcaaacagggtctggagtggacctcaagcaatctccaacagacctacagctgagggtcctgactgttagaaggaaaactgtcaaacaggaaggacacctacaccaaaaccccatcagtacatcaccatcatcaaagaccagaggcagataaaaccacaaagATGGGGAAAAAGCAGGGCAGAAAAGCTGGAAATTCAAAAAATAAGAGCGCATCTCCCCCGGCAAAGGAGCGCAGCTCATCGCCAGCAACGGATCAAAGCTGGACGGAGAATGACTTTGACGAGATGAGAGAAGAAGGCTTCAGTCCTTCAAATTTCTCAGAGCTAAAGGAGGAATTACGTACCCAGCGCAAAGAAACTAAAAATCTTGAAAAAAAAGTGGAAGAATTGATGGCTAGAGTAATTAATGCAGAGAAGGTCCTAAACGAAATGAAAGAGATGAAAACCATGACACGAGAAATACGTGACAAATGCACAAGCTTCAGTAACCGACTCGATCAACTGGAAGAAAGAGTATCAGCGATTGAGGATCAAATGAATGAAATGAAGCGAGAAGAGAAACCAAAAGAAAAAAGAAGAAAAAGAAACGAACAAAGCCTGCAAGAAGTATGGGATTATGTAAAAAGACCAAATCTACGTCTGATTGGGGTGCCTGAAAGTGAGGGGGAAAATGGAACCAAGTTGGAAAACACTCTTCAGGATATCATCCAGGAGAACTTCCCCAACCTAGTAGGGCAGGCCAACATTCAAATCCAGGAAATACAGAGAACGCCACAAAGATACTCCTCGAGAAGAGCAACTCCAAGACACATAATTGCCAGATTCACCAAAGTTGAAATGAAGGAAAAAATCTTAAGGGCAGCCAGAGAGAAAGGTCGGGTTACCCACAAAGGGAAGCCCATCAGACTAACAGCAGATCTCTCAGCAGAAACTCTACAAGCCAGAAGAGAGTGGGGGCCAATATTCAACATTCTTAAAGAAAAGAATTTTAAACCCAGAATTTCATATCCAGCCAAACTAAGTTTCATAAGTGAAGGAGAAATAAAATCCTTTACAGATAAGCAAATGCTTAGAGATTTTGTCACCACTAGGCCTGCCTTACAAGAGATCCTGAAGGAAGCACTAAACATGGAAAGGAACAACCGGTACCAGCCATTGCAAAAACATGCCAAAATGTAAagaccattgaggctaggaagaaactgcatcaactaatgagcaaaataaccagttaatatcataATGGCAGGATCAAGTTCACACATAACAATATTAACCTTAAATGTAAATGGACTAAATGCTCCAATTAAAAGACACAGACTGGCAAACTGGATAAAGAGTCAAGACCCATCAGTCTGCTGTATTCAGGAGACCCATCTCACACGCAGAGACATACATAGGCTCAAAATAAAGGGATGGAGGAAGATTTACCAAGCAAATGGAGAACAAAAAAAAGCAGGGGTTGCAATACTAGTCTCTGATAAAACAGACTTTAAACCATCAAAGATCAAAAGAGACAAAGAAGGCCATTACATAATGGTAAAGGGATCAATTCAACAGGAAGAGCTAACTATCCTAAATATATATGCACCCAATACAGGAGCACCCAGATTCATAAAGCAAGTCCTTAGAGACTTACAAAGAGACTTAGACTCCCATACAATAATAATGGGAGACTTCAACACTCCACTGTCAACATTAGACAGATCAACGAGACAGAAAGTTAACAAGGATATCCAGGAATTGAACTCATCTCTGCAGCAAGCAGACCTAATAGACATCTACAGAACTCTCCACCCCAAATCAACAGAATATACATTCTTCTCAGCACCACATCATACTTACTCCAAAATTGACCACGTAATTGGAAGTAAAGCACTCCTCAGCAAATGTACAAGAACAGAAATTATAACAAACTGTCTCTCAGACCACAGTGCAATCAAATTAGAACTCAGGACTAAGACACTCAATCAAAACCGCTCAACTACATGGAAACTGAACAACCTGCTCCTGAATGACTACTGGGTACATAACGAAATGAAGGCAGAAATAAAGATGTTCTTTGAAACCAATGAGAACAAAGATACAACATACCAGAATCTCTGGGACACATTTAAAGCAGTGTGTAGAGGGAAATTTATAGCACTAAATGCCCACAAGAGAAAGCAGGAAAGATGTAAAATTGACACTCTAACATCGCAATTAAAAGAACTAGAGAAGCAAGAGCAAACACATTCGAAAGCTAGCAGAAGGCAAGAAATAACTAAGATCAGAGCAGAACTGAAGGAGATAGAAACACAAAAAACCCTCCAAAAAATCAATGAATCCAGGAGTTGGTTTTTTGAAAAGATCAACAAAATTGACAGACCACTAGCCAGACTAATAAAGAAGAAAAGAGAGAAGAATCAAATCGACGCAATAAAAAATGATAAAGGGGATATCACCACCGACCCCACAGAAATACAAACTACCATCAGAGAATACTATAAACACCTCTACGCAAATAAACTGGAAAATCTAGAAGAAATGGATAATTTCCTGGACACTTACACTCTTCCAAGACTAAACCAGGAAGAAGTTGAATCCCTGAATAGACCAATAGCAGGCTCTGAAATTGAGGCAACAATTAATAGCCTACCAACCAAAAAAAGTCCAGGACCAGATGGATTCACAGCTGAATTCTACCAGAGGTACAAAGAGGAGTTGGTACCATTCCTTCTGAAACTATTCCAATCAATAGAAAAAGAGGGAATCCTCCCTAACTCATTTTATGAGGCCAACATCATCCTGATACCAAAGCCTGGCAGAGACACAACAAAAAAAGAGAATTTTAGACCAATATCCCTGATGAACATCGATGCAAAAATCCTCAATAAAATACTGGCAAACCGGATTCAGCAACACATCAAAAAGCTTATCCACCATGATCAAGTGGGCTTCATCCCTGGGATGCAAGGCTGGTTCAACATTCGCAAATCAATAAACATAATCCAGCATATAAACAGAACCAAAGACAAGAACCACATGATTATCTCAATTGATGCAGAAAAGGCTTTTGACAAAATTCAACAGCCCTTCATGCTAAAAACGCTCAATAAATTCGGTATTGATGGAACGTACCTCAAAATAATAAGAGCTATTTATGACAAACCCACAGCCAATATCATACTGAATGGGCAAAAACTGGAAAAATTCCCTTTGAAAACTGGCACAAGACAGGGATGCCCTCTCTCACCACTCCTATTCAACATAGTGTTGGAAGTTCTGGCTAGGGCAATCAGGCAAGAGAAAGAAATCAAGGGTATTCAGTTAGGAAAAGAAGAAGTCAAATTGTCCCTGTTTGCAGATGACATGATTGTATATTTAGAAAACCCCATTGTCTCAGCCCAAAATCTCCTTAAGCTGATAAGCAACTTCAGCAAAGTCTCAGGATACAAAATTAATGTGCAAAAATCACAAGCATTCTTATACACCAGTAACAGACAAACAGAGAGCCAAATCAGGAATGAACTTCCATTCACAGTTGCTTCAAAGAGAATCAAATACCTAGGAATCCAACTTACAAGGGATGTAAAGGACCTCTTCAAGGAGAACTACAAACCACTGCTCAGTGAAATCAAAGAGGACACAAACAAATGGAAGAACATACCATGCTCATGGATAGGAAGAATCAATATTGTGAAAATGGCCATACTGCCCAAGGTAATTTATAGATTCAATGCCATCCCCATCAAGCTACCAATGAGTTTCTTCACAGAGTTGGAAAAAACTACTTTAAAGTTCATATGGAACCAAAAAAGAGCCCGCATCTCCAAGACAATCCTAAGTCAAAAGAACAAAGCTGGAGGCATCACGCTACCTGACTTCAAACTATACTACAAGGCTACAGTAACCAAAACAGCATGGTACTGGTACCAAAACAGAGATATAGACCAATGGAACAGAACAGAGTCCTCAGAAATAATACCACACATCTACAGCCATTTGATCTTTGACAAACCTGAGAGAAACAAGAAATGGGGAAAGGATTCCCTATTTAATAAATGGTGCTGGGAAAATTGGCTAGCCATAAGTAGAAAGCTGAAACTGGATCCTTTCCTTACTCCTTATACGAAAATTAATTCAAGATGGATTAGAGACTTAAATGTTAGACCTAATACCATAAAAATCCTAGAGGAAAACCTAGGTAGTACCATTCAGGACATAGGCATGGGCAAAGATTTCATGTCTAAAACACCAAAAGCAACGGCAGCAAAAGCCAAAATTGACAAATGGGATCTCATTAAACTAAAGAGCTTCTGCACAGCAAAAGACACTACCATCAGAGTGAACAGGCAACCTACAGAATGGGAGAAAATTTTTGCAATCTACTCATCTGACAAAGGGCTTATATCCAGAACCTACAAAGAACTCAAACAAATTTACAAGAAAAAAACAAACAACCCCATCAAAAAGTGGGCAAAGGACATGAACAGACATTTCTCAAAAGAAGACATTCATACAGCCAACAGACACATGAAAAAATGCTCATCATCACTGGCCATCAGAGAAATGCAAATCAAAACCACAATGAGATACCATCTCACACCAGTTAGAATGGCAATCATTAAAAAGTCCGGAAACAACAGGTGCTGGAGAGGATGTGGAGAAATAGGAACACTTTTACACTGTTGGTGGGATTGTAAACTAGTTCAACCATTATGGAAAACAGTATGGCGATTCCTCAAGGATCTAGAACTAGATGTACCATATGACCCAGCCATCCCATTACTGGGTATATACCCAAAGGATTATAAATTATGCTGCTATAAAGACACATGCACACGTATGTTTATTGCAGCACTATTCACAATAGCAAAGACTTGGAATCAACCCAAATGTCCATCAGTGACAGATTGGATTAAGAAAATGTGGCACATATACACCATGGAATACTATGCAGCCATAAAAAAGGATGAGTTTGATTCCTTTGTAGGGACTTGGATGCAGCTGGAATCCATCATTCTTAGCAAACTATCACAAGAACAGAAAACCAAACACCGCATGTTCTCACTCATAGGTGGGAACTGAacaatgagatcactcggactcaggaaggggaacatcacacaccggggcctatcatggggaggggggaggggggagggattgcattgggagttatacctgatgtaaatgacgagttgatgggtgcagcacagcaacatggcacaagtatacatatgtaacaaacctgcacgttatgcacatgtaccctacaacttaaagtataaaaaaaaaaaaaaaTTTTACTCGACGGATCGATCCGAACAAACGACCCAACACCCGTGCGTTTTATTCTGTCTTTTTATTGCCGATCCCCTCAGAAGAACTCGTCAAGAAGGCGATAGAAGGCGATGCGCTGCGAATCGGGAGCGGCGATACCGTAAAGCACGAGGAAGCGGTCAGCCCATTCGCCGCCAAGCTCTTCAGCAATATCACGGGTAGCCAACGCTATGTCCTGATAGCGGTCGGCCGCTTTACTTGTACAGCTCGTCCATGCCGAGAGTGATCCCGGCGGCGGTCACGAACTCCAGCAGGACCATGTGATCGC

Sequencing traces extracted from the attached Sanger_seq files (manually curated nucleotides are in lower case).

>L1RS2eGFPI_vector_pCEP4Fw

GACTGAGCAGACAGACCCATGGTTTTTGGATGGCCTGGGCATGGAccGCATGTACTGGCGCGACACGAACACCGGGCGTCTGTGGCTGCCAAACACCCCCGACCCCCAAAAACCACCGCGCGGATTTCTGGCGTGCCAAGCTAGTCGACCAATTCTCATGTTTGACAGCTTATCATCGCAGATCCGGGCAACGTTGTTGCCATTGCTGCAGGCGCAGAACTGGTAGGTATGGAAGATCTCTAGAAGCTGGGTACCAGCTGCTAGCAAGCTTGCTAGCGGCCGCTGATAATATA

> L1RS2eGFPI_vector_SOM5J-Fw

ATAGGAGCAGCTCCAGTCTCCAACTCCCAGCGCCAGCGACACAGAAGACCGGTGATTTCTGCATTTTCAACTGAGGTACTGGGTTCATCTCACTGGGGAGTGCCGGACGATCGGTGCTGGTCAGCTGCTGCAGCCCGACCAGCGAGAGCTGAAGCAGGGCGAGGCATTGCCTCACCTGGGAAGCGCAAGGGGGAAGGGAGTCCCTTTTCCTAGCCAGGGGAACTGAGACACACAACACCTGGAAAATCGGGTAACTCCCACCCCAATACTGCGCTTTAGGAAACAGGCACACCAGGAGATCATATCCCACACCTGGCCGGGAGGGTCCCACACCCACGGAGCCTCCCTCGTTGCTAGCGCAGCAGTCTGTGATCTACCGGCAAGGCAGCAGCGAGGCTGGGGGAGGGGCGCCCGCCATTGCTGAGGCTTAAGTAGGTAAACAAAGCTGCTGGGAAGCTCGAACTGGGTGGAGCTCACAGCAGCTCAAGGAAACCTGCCTGTCTCTGTAGACTCCACCTCTGGGGACAGGGCACAGTAAACTAAGACACACAGACACCTCTGCACAGACGCAAACGACTCTGTCTGACAGCTTTGAAGAGAGCAGTGGATCTCCCAACACGGAGGTTGAGATCTGAGAAGGGACAGACTCCCTGCTCAAGCGGGTCCCTGACCCCTGAGTAGCCTAACTGGGAGACATCCCCCACTAGGGGCAGTCTGACACCCCACACCTCACA

>L1RS2eGFPI_vector_114R

GAAGCTGGGTACCAGCTGCTAGCAAGCTTGCTAGCGGCCGCTGATAATATAGCCCATAATAGAGAGGGGGGCGGAGCAAGATGGCCGAATAGGAGCAGCTCCAGTCTCCAACTCCCAGCGCCAGCGACACAG

>L1RS2eGFPI_vector_1032R

GCAGCAGCGAGGCTGGGGGAGGGGCGCCCGCCATTGCTGAGGCTTAAGTAGGTAAACAAAGCTGCTGGGAAGCTCGAACTGGGTGGAGCTCACAGCAGCTCAAGGAAACCTGCCTGTCTCTGTAGACTCCACCTCTGGGGACAGGGCACAGTAAACTAAGACACACAGACACCTCTGCACAGACGCAAACGACTCTGTCTGACAGCTTTGAAGAGAGCAGTGGATCTCCCAACACGGAGGTTGAGATCTGAGAAGGGACAGACTCCCTGCTCAAGCGGGTCCCTGACCCCTGAGTAGCCTAACTGGGAGACATCCCCCACTAGGGGCAGTCTGACACCCCACACCTCACAGGGAGGAGTACACCCCTGAGAGGAAGCTTCCAAAGCAAGAATCAGACAGGTACACTCGCTGTTCAGAAATATTCTATCTTCTGCAGCCTCTGCTGCTGATACCCAGGCAAACAGGGTCTGGAGTGGACCTCAAGCAATCTCCAACAGACCTACAGCTGAGGGTCCTGACTGTTAGAAGGAAAACTGTCAAACAGGAAGGACACCTACACCAAAACCCCATCAGTAC

>L1RS2eGFPI_vector_476F

TCTCTGTAGACTCCACCTCTGGGGACAGGGCACAGTAAACTAAGACACACAGACACCTCTGCACAGACGCAAACGACTCTGTCTGACAGCTTTGAAGAGAGCAGTGGATCTCCCAACACGGAGGTTGAGATCTGAGAAGGGACAGACTCCCTGCTCAAGCGGGTCCCTGACCCCTGAGTAGCCTAACTGGGAGACATCCCCCACTAGGGGCAGTCTGACACCCCACACCTCACAGGGAGGAGTACACCCCTGAGAGGAAGCTTCCAAAGCAAGAATCAGACAGGTACACTCGCTGTTCAGAAATATTCTATCTTCTGCAGCCTCTGCTGCTGATACCCAGGCAAACAGGGTCTGGAGTGGACCTCAAGCAATCTCCAACAGACCTACAGCTGAGGGTCCTGACTGTTAGAAGGAAAACTGTCAAACAGGAAGGACACCTACACCAAAACCCCATCAGTACATCACCATCATCAAAGACCAGAGGCAGATAAAACCACAAAGATGGGGAAAAAGCAGGGCAGAAAAGCTGGAAATTCAAAAAATAAGAGCGCATCTCCCCCGGCAAAGGAGCGCAGCTCATCGCCAGCAACGGATCAAAGCTGGACGGAGAATGACTTTGACGAGATGAGAGAAGAAGGCTTCAGTCCTTCAAATTTCTCAGAGCTAAAGGAGGAATTACGTACCCAGCGCAAAGAAACTAAAAATCTTGAAAAAAAAGTGGAAGAATTGATGGCTAGAGTAATTAATGCAGAGAAGGTCCTAAACGAAATGAAAGAGATGAAAACCATGACACGAG

>L1RS2eGFPI_vector_1008F

AAAATAAGAGCGCATCTCCCCCGGCAAAGGAGCGCAGCTCATCGCCAGCAACGGATCAAAGCTGGACGGAGAATGACTTTGACGAGATGAGAGAAGAAGGCTTCAGTCCTTCAAATTTCTCAGAGCTAAAGGAGGAATTACGTACCCAGCGCAAAGAAACTAAAAATCTTGAAAAAAAAGTGGAAGAATTGATGGCTAGAGTAATTAATGCAGAGAAGGTCCTAAACGAAATGAAAGAGATGAAAACCATGACACGAGAAATACGTGACAAATGCACAAGCTTCAGTAACCGACTCGATCAACTGGAAGAAAGAGTATCAGCGATTGAGGATCAAATGAATGAAATGAAGCGAGAAGAGAAACCAAAAGAAAAAAGAAGAAAAAGAAACGAACAAAGCCTGCAAGAAGTATGGGATTATGTAAAAAGACCAAATCTACGTCTGATTGGGGTGCCTGAAAGTGAGGGGGAAAATGGAACCAAGTTGGAAAACACTCTTCAGGATATCATCCAGGAGAACTTCCCCAACCTAGTAGGGCAGGCCAACATTCAAATCCAGGAAATACAGAGAACGCCACAAAGATACTCCTCGAGAAGAGCAACTCCAAGACACATAATTGCCAGATTCACCA

>L1RS2eGFPI_vector_1615F

GACACATAATTGCCAGATTCACCAAAGTTGAAATGAAGGAAAAAATCTTAAGGGCAGCCAGAGAGAAAGGTCGGGTTACCCACAAAGGGAAGCCCATCAGACTAACAGCAGATCTCTCAGCAGAAACTCTACAAGCCAGAAGAGAGTGGGGGCCAATATTCAACATTCTTAAAGAAAAGAATTTTAAACCCAGAATTTCATATCCAGCCAAACTAAGTTTCATAAGTGAAGGAGAAATAAAATCCTTTACAGATAAGCAAATGCTTAGAGATTTTGTCACCACTAGGCCTGCCTTACAAGAGATCCTGAAGGAAGCACTAAACATGGAAAGGAACAACCGGTACCAGCCATTGCAAAAACATGCCAAAATGTAAAGACCATTGAGGCTAGGAAGAAACTGCATCAACTAATGAGCAAAATAACCAGTTAATATCATAATGGCAGGATCAAGTTCACACATAACAATATTAACCTTAAATGTAAATGGACTAAATGCTCCAATTAAAAGACACA

>L1RS2eGFPI_vector_2056F

GATCAAGTTCACACATAACAATATTAACCTTAAATGTAAATGGACTAAATGCTCcAATTAAAAGACACAGACTGGCAAACTGGATAAAGAGTCAAGACCCATCAGTCTGCTGTATTCAGGAGACCCATCTCACACGCAGAGACATACATAGGCTCAAAATAAAGGGATGGAGGAAGATTTACCAAGCAAATGGAGAACAAAAAAAAGCAGGGGTTGCAATACTAGTCTCTGATAAAACAGACTTTAAACCATCAAAGATCAAAAGAGACAAAGAAGGCCATTACATAATGGTAAAGGGATCAATTCAACAGGAAGAGCTAACTATCCTAAATATATATGCACCCAATACAGGAGCACCCAGATTCATAAAG

>L1RS2eGFPI_vector_2368F

ACTATCCTAAATATATATGCACCCAATACAGGAGCACCCAGATTCATAAAGCAAGTCCTTAGAGACTTACAAAGAGACTTAGACTCCCATACAATAATAATGGGAGACTTCAACACTCCACTGTCAACATTAGACAGATCAACGAGACAGAAAGTTAACAAGGATATCCAGGAATTGAACTCATCTCTGCAGCAAGCAGACCTAATAGACATCTACAGAACTCTCCACCCCAAATCAACAGAATATACATTCTTCTCAGCACCA

>L1RS2eGFPI_vector_2646F

GCACCACATCATACTTACTCCAAAATTGACCACGTAATTGGAAGTAAAGCACTCCTCAGCAAATGTACAAGAACAGAAATTATAACAAACTGTCTCTCAGACCACAGTGCAATCAAATTAGAACTCAGGACTAAGACACTCAATCAAAACCGCTCAACTACATGGAAACTGAACAACCTGCTCCTGAATGACTACTGGGTACATAACGAAATGAAGGCAGAAATAAAGATGTTCTTTGAAACCAATGAGAACAAAGATACAACATACCAGAATCTCTGGGACACATTTAAAGCAGTGTGTAGAGGGAAATTTATAGCACTAAATGCCCACAAGAGAAAGCAGGAAAGATGTAAAATTGACACTCTAACATCGCAATTAAAAGAACTAGAGAAGCAAGAGCAAACACATTCGAAAGCTAGCAGAAGGCAAGAAATAACTAAGATCAGAGCAGAACTGAAGGAGATAGAAACACAAAAAACCCTCCAAAAAATCAATGAATCCAGGAGTTGGTTTTTTGAAAAGATCAACAAAATTGACAGACCACTAGCCAGACTAATAAAGAAGAAAAGAGAGAAGAATCAAATCGACGCAATAAAAAATGATAAAGGGGATATCACCACCGACCCCACAGAAATACAAACTACCATCAGAGAATACTATAAACACCTCTACGCAAATAAACTGGAAAATCTAGAAGAAATGGATAATTTCCTGGACACTTACACTCTTCCAAGACTAAACCAGGAAGAAGTTGAATCCCTGAATA

>L1RS2eGFPI_vector_3106F

AAACCCTCCAAAAAATCAATGAATCCAGGAGTTGGTTTTTTGAAAAGATCAACAAAATTGACAGACCACTAGCCAGACTAATAAAGAAGAAAAGAGAGAAGAATCAAATCGACGCAATAAAAAATGATAAAGGGGATATCACCACCGACCCCACAGAAATACAAACTACCATCAGAGAATACTATAAACACCTCTACGCAAATAAACTGGAAAATCTAGAAGAAATGGATAATTTCCTGGACACTTACACTCTTCCAAGACTAAACCAGGAAGAAGTTGAATCCCTGAATAGACCAATAGCAGGCTCTGAAATTGAGGCAACAATTAATAGCCTACCAACCAAAAAAAGTCCAGGACCAGATGGATTCACAGCTGAATTCTACCAGAGGTACAAAGAGGAGTTGGTACCATTCCTTCTGAAACTATTCCAATCAATAGAAAAAGAGGGAATCCTCCCTAACTCATTTTATGAGGCCAACATCATCCTGATACCAAAGCCTGGCAGAGACACAACAAAAAAAGAGAATTTTAGACCAATATCCCTGATGAACATCGATGCAAAAATCCTCAATAAAATACTGGCAAACCGGATTCAGCAACACATCAAAAAGCTTATCCACCATGATCAAGTGGGCTTCATCCCTGGGATGCAAGGCTGGTTCAACATTCGCAAATCAATAAACATAATCCAGCATATAAACAGAACCAAAGACAAGAACCACATGATTATCTCAATTGATGCAG

>L1RS2eGFPI_vector_3542R

TGGGTACATAACGAAATGAAGGCAGAAATAAAGATGTTCTTTGAAACCAATGAGAACAAAGATACAACATACCAGAATCTCTGGGACACATTTAAAGCAGTGTGTAGAGGGAAATTTATAGCACTAAATGCCCACAAGAGAAAGCAGGAAAGATGTAAAATTGACACTCTAACATCGCAATTAAAAGAACTAGAGAAGCAAGAGCAAACACATTCGAAAGCTAGCAGAAGGCAAGAAATAACTAAGATCAGAGCAGAACTGAAGGAGATAGAAACACAAAAAACCCTCCAAAAAATCAATGAATCCAGGAGTTGGTTTTTTGAAAAGATCAACAAAATTGACAGACCACTAGCCAGACTAATAAAGAAGAAAAGAGAGAAGAATCAAATCGACGCAATAAAAAATGATAAAGGGGATATCACCACCGACCCCACAGAAATACAAACTACCATCAGAGAATACTATAAACACCTCTACGCAAATAAACTGGAAAATCTAGAAGAAATGGATAATTTCCTGGACACTTACACTCTTCCAAGACTAAACCAGGAAGAAGTTGAATCCCTGAATAGACCAATAGCAGGCTCTGAAATTGAGGCAACA

> L1RS2eGFPI_vector_3719F

GCTTATCCACCATGATCAAGTGGGCTTCATCCCTGGGATGCAAGGCTGGTTCAACATTCGCAAATCAATAAACATAATCCAGCATATAAACAGAACCAAAGACAAGAACCACATGATTATCTCAATTGATGCAGAAAAGGCTTTTGACAAAATTCAACAGCCCTTCATGCTAAAAACGCTCAATAAATTCGGTATTGATGGAACGTACCTCAAAATAATAAGAGCTATTTATGACAAACCCACAGCCAATATCATACTGAATGGGCAAAAACTGGAAAAATTCCCTTTGAAAACTGGCACAAGACAGGGATGCCCTCTCTCACCACTCCTATTCAACATAGTGTTGGAAGTTCTGGCTAGGGCAATCAGGCAAGAGAAAGAAATCAAGGGTATTCAGTTAGGAAAAGAAGAAGTCAAATTGTCCCTGTTTGCAGATGACATGATTGTATATTTAGAAAACCCCATTGTCTCAGCCCAAAATCTCCTTAAGCTGATAAGCAACTTCAGCAAAGTCTCAGGATACAAAATTAATGTGCAAAAATCACAAGCATTCTTATACACCAGTAACAGACAAACAGAGAGCCAAATCAGGAATGAACTTCCATTCACAGTTGCTTCAAAGAGAATCAAATACCTAGGAATCCAACTTACAAGGGATGTAAAGGACCTCTTCAAGGAGAACTACAAA

>L1RS2eGFPI_vector_4311F

GAACTTCCATTCACAGTTGCTTCAAAGAGAATCAAATACCTAGGAATCCAACTTACAAGGGATGTAAAGGACCTCTTCAAGGAGAACTACAAACCACTGCTCAGTGAAATCAAAGAGGACACAAACAAATGGAAGAACATACCATGCTCATGGATAGGAAGAATCAATATTGTGAAAATGGCCATACTGCCCAAGGTAATTTATAGATTCAATGCCATCCCCATCAAGCTACCAATGAGTTTCTTCACAGAGTTGGAAAAAACTACTTTAAAGTTCATATGGAACCAAAAAAGAGCCCGCATCTCCAAGACAATCCTAAGTCAAAAGAACAAAGCTGGAGGCATCACGCTACCTGACTTCAAACTATACTACAAGGCTACAGTAACCAAAACAGCATGGTACTGGTACCAAAACAGAGATATAGACCAATGGAACAGAACAGAGTCCTCAGAAATAATACCACACATCTACAGCCATTTGATCTTTGACAAACCTGAGAGAAACAAGAAATGGGGAAAGGATTCCCTATTTAATAAATGGTGCTGGGAAAATTGGCTAGCCATAAGTAGAAAGCTGAAACTGGATCCTTTCCTTACTCCTTATACGAAAATTAATTCAAGATGGATTA

>L1RS2eGFPI_vector_4891F

ACTGGATCCTTTCCTTACTCCTTATACGAAAATTAATTCAAGATGGATTAgAGACTTAAATGTTAGACCTAATACCATAAAAATCCTAGAGGAAAACCTAGGTAGTACCATTCAGGACATAGGCATGGGCAAAGATTTCATGTCTAAAACACCAAAAGCAACGGCAGCAAAAGCCAAAATTGACAAATGGGATCTCATTAAACTAAAGAGCTTCTGCACAGCAAAAGACACTACCATCAGAGTGAACAGGCAACCTACAGAATGGGAGAAAATTTTTGCAATCTACTCATCTGACAAAGGGCTTATATCCAGAACCTACAAAGAACTCAAACAAATTTACAAGAAAAAAACAAACAACCCCATCAAAAAGTGGGCAAAGGACATGAACAGACATTTCTCAAAAGAAGACATTCATACAGCCAACAGACACATGAAAAAATGCTCATCATCACTGGCCATCAGAGAAATGCAAATCAAAACCACAATGAGATACCATCTCACACCAGTTAGAATGGCAATCATTAAAAAGTCCGGAAACAACAGGTGCTGGAGAGGATGTGGAgAAATAGGAACACTTTTACACTGTTGGTGGGATTGTAAACTAGTTCAAC

>L1RS2eGFPI_vector_5479F

TTGGTGGGATTGTAAACTAGTTCAACCATTATGGAAAACAGTATGGCGATTCCTCAAGGATCTAGAACTAGATGTACCATATGACCCAGCCATCCCATTACTGGGTATATACCCAAAGGATTATAAATTATGCTGCTATAAAGACACATGCACACGTATGTTTATTGCAGCACTATTCACAATAGCAAAGACTTGGAATCAACCCAAATGTCCATCAGTGACAGATTGGATTAAGAAAATGTGGCACATATACACCATGGAATACTATGCAGCCATAAAAAAGGATGAGTTTGATTCCTTTGTAGGGACTTGGATGCAGCTGGAATCCATCATTCTTAGCAAACTATCACAAGAACAGAAAACCAAACACCGCATGTTCTCACTCATAGGTGGGAACTGAACAATGAGATCACTCGGACTCAGGAAGGGGAACATCACACACCGGGGCCTATCATGGGGAGGGGGGAGGGGGGAGGGAT

>L1RS2eGFPI_vector_6011F

ACATGGCACAAGTATACATATGTAACAAACCTGCACGTTATGCACATGTaCCCTACAACTTAAAGTATAAAAAAAAAAAAAAATTTTACTCGACGGATCGATCCGAACAAACGACCCAACACCCGTGCGTTTTATTCTGTCTTTTTATTGCCGATCCCCTCAGAAGAACTCGTCAAGAAGGCGATAGAAGGCGATGCGCTGCGAATCGGGAGCGGCGATACCGTAAAGCACGAGGAAGCGGTCAGCCCATTCGCCGCCAAGCTCTTCAGCAATATCACGGGTAGCCAACGCTATGTCCTGATAGCGGTCGGCCGCTTTACTTGTACAGCTCGTCCATGCCGAGAGTGATCCCGGCGGCGGTCACGAACTCCAGCAGGACCATGTGATCGC

> L1RS2eGFPI_vector_eGFPIRv

TTAGCAAACTATCACAAGAACAGAAAACCAAACACCGCATGTTCTCACTCATAGGTGGGAACTGAACAATGAGATCACTCGGACTCAGGAAGGGGAACATCACACACCGGGGCCTATCATGGGGAGGGGGGAGGGGGGAGGGATTGCATTGGGAGTTATACcTGATGTAAATGACGAGTTGATGGGTGCAGCACAGCAACATGGCACAAGTATACATATGTAACAAACCTGCACGTTATGCACATGTACCCTACAACTTAAAGTATAAAAAAAAAAAAAAATTTTACTCGACGGATCGATCCGAACAAACGACCCAACACCCGTGC
