# Supplementary material for: Somatic retrotransposition in the developing rhesus macaque brain
Source: HighWire-hosted journal article supplement (doi:10.1101/gr.276451.121), 2022-06-21
Supplement: Supplemental_File_S1.zip [file L1RS2PRMD4_PCR.docx]

GGACAGTAGGCGGAGTTGAGATTTGATGTCAGAGgggggcggagcaagatggccgaataggagcagctccagtctccaactcccagcgccagcgacacagaagaccggtgatttctgcattttcaactgaggtactgggttcatctcactggggagtgccggacgatcggtgctggtcagctgctgcagcccgaccagcgagagctgaagcagggcgaggcattgcctcacctgggaagcgcaagggggaagggagtcccttttcctagccaggggaactgagacacacaacacctggaaaatcgggtaactcccaccccaatactgcgctttaggaaacaggcacaccaggagatcatatcccacacctggccgggagggtcccacacccacggagcctccctcgttgctagcgcagcagtctgtgatctaccggcaaggcagcagcgaggctgggggaggggcgcccgccattgctgaggcttaagtaggtaaacaaagctgctgggaagctcgaactgggtggagctcacagcagctcaaggaaacctgcctgtctctgtagactccacctctggggacagggcacagtaaactaagacacacagacacctctgcacagacgcaaacgactctgtctgacagctttgaagagagcagtggatctcccaacacggaggttgagatctgagaagggacagactccctgctcaagcgggtccctgacccctgagtagcctaactgggagacatcccccactaggggcagtctgacaccccacacctcacagggaggagtacacccctgagaggaagcttccaaagcaagaatcagacaggtacactcgctgttcagaaatattctatcttctgcagcctctgctgctgatacccaggcaaacagggtctggagtggacctcaagcaatctccaacagacctacagctgagggtcctgactgttagaaggaaaactgtcaaacaggaaggacacctacaccaaaaccccatcagtacatcaccatcatcaaagaccagaggcagataaaaccacaaagATGGGGAAAAAGCAGGGCAGAAAAGCTGGAAATTCAAAAAATAAGAGCGCATCTCCCCCGGCAAAGGAGCGCAGCTCATCGCCAGCAACGGATCAAAGCTGGACGGAGAATGACTTTGACGAGATGAGAGAAGAAGGCTTCAGTCCTTCAAATTTCTCAGAGCTAAAGGAGGAATTACGTACCCAGCGCAAAGAAACTAAAAATCTTGAAAAAAAAGTGGAAGAATTGATGGCTAGAGTAATTAATGCAGAGAAGGTCCTAAACGAAATGAAAGAGATGAAAACCATGACACGAGAAATACGTGACAAATGCACAAGCTTCAGTAACCGACTCGATCAACTGGAAGAAAGAGTATCAGCGATTGAGGATCAAATGAATGAAATGAAGCGAGAAGAGAAACCAAAAGAAAAAAGAAGAAAAAGAAACGAACAAAGCCTGCAAGAAGTATGGGATTATGTAAAAAGACCAAATCTACGTCTGATTGGGGTGCCTGAAAGTGAGGGGGAAAATGGAACCAAGTTGGAAAACACTCTTCAGGATATCATCCAGGAGAACTTCCCCAACCTAGTAGGGCAGGCCAACATTCAAATCCAGGAAATACAGAGAACGCCACAAAGATACTCCTCGAGAAGAGCAACTCCAAGACACATAATTGCCAGATTCACCAAAGTTGAAATGAAGGAAAAAATCTTAAGGGCAGCCAGAGAGAAAGGTCGGGTTACCCACAAAGGGAAGCCCATCAGACTAACAGCAGATCTCTCAGCAGAAACTCTACAAGCCAGAAGAGAGTGGGGGCCAATATTCAACATTCTTAAAGAAAAGAATTTTAAACCCAGAATTTCATATCCAGCCAAACTAAGTTTCATAAGTGAAGGAGAAATAAAATCCTTTACAGATAAGCAAATGCTTAGAGATTTTGTCACCACTAGGCCTGCCTTACAAGAGATCCTGAAGGAAGCACTAAACATGGAAAGGAACAACCGGTACCAGCCATTGCAAAAACATGCCAAAATGTAAagaccattgaggctaggaagaaactgcatcaactaatgagcaaaataaccagttaatatcataATGGCAGGATCAAGTTCACACATAACAATATTAACCTTAAATGTAAATGGACTAAATGCTCCAATTAAAAGACACAGACTGGCAAACTGGATAAAGAGTCAAGACCCATCAGTCTGCTGTATTCAGGAGACCCATCTCACACGCAGAGACATACATAGGCTCAAAATAAAGGGATGGAGGAAGATTTACCAAGCAAATGGAGAACAAAAAAAAGCAGGGGTTGCAATACTAGTCTCTGATAAAACAGACTTTAAACCATCAAAGATCAAAAGAGACAAAGAAGGCCATTACATAATGGTAAAGGGATCAATTCAACAGGAAGAGCTAACTATCCTAAATATATATGCACCCAATACAGGAGCACCCAGATTCATAAAGCAAGTCCTTAGAGACTTACAAAGAGACTTAGACTCCCATACAATAATAATGGGAGACTTCAACACTCCACTGTCAACATTAGACAGATCAACGAGACAGAAAGTTAACAAGGATATCCAGGAATTGAACTCATCTCTGCAGCAAGCAGACCTAATAGACATCTACAGAACTCTCCACCCCAAATCAACAGAATATACATTCTTCTCAGCACCACATCATACTTACTCCAAAATTGACCACGTAATTGGAAGTAAAGCACTCCTCAGCAAATGTACAAGAACAGAAATTATAACAAACTGTCTCTCAGACCACAGTGCAATCAAATTAGAACTCAGGACTAAGACACTCAATCAAAACCGCTCAACTACATGGAAACTGAACAACCTGCTCCTGAATGACTACTGGGTACATAACGAAATGAAGGCAGAAATAAAGATGTTCTTTGAAACCAATGAGAACAAAGATACAACATACCAGAATCTCTGGGACACATTTAAAGCAGTGTGTAGAGGGAAATTTATAGCACTAAATGCCCACAAGAGAAAGCAGGAAAGATGTAAAATTGACACTCTAACATCGCAATTAAAAGAACTAGAGAAGCAAGAGCAAACACATTCGAAAGCTAGCAGAAGGCAAGAAATAACTAAGATCAGAGCAGAACTGAAGGAGATAGAAACACAAAAAACCCTCCAAAAAATCAATGAATCCAGGAGTTGGTTTTTTGAAAAGATCAACAAAATTGACAGACCACTAGCCAGACTAATAAAGAAGAAAAGAGAGAAGAATCAAATCGACGCAATAAAAAATGATAAAGGGGATATCACCACCGACCCCACAGAAATACAAACTACCATCAGAGAATACTATAAACACCTCTACGCAAATAAACTGGAAAATCTAGAAGAAATGGATAATTTCCTGGACACTTACACTCTTCCAAGACTAAACCAGGAAGAAGTTGAATCCCTGAATAGACCAATAGCAGGCTCTGAAATTGAGGCAACAATTAATAGCCTACCAACCAAAAAAAGTCCAGGACCAGATGGATTCACAGCTGAATTCTACCAGAGGTACAAAGAGGAGTTGGTACCATTCCTTCTGAAACTATTCCAATCAATAGAAAAAGAGGGAATCCTCCCTAACTCATTTTATGAGGCCAACATCATCCTGATACCAAAGCCTGGCAGAGACACAACAAAAAAAGAGAATTTTAGACCAATATCCCTGATGAACATCGATGCAAAAATCCTCAATAAAATACTGGCAAACCGGATTCAGCAACACATCAAAAAGCTTATCCACCATGATCAAGTGGGCTTCATCCCTGGGATGCAAGGCTGGTTCAACATTCGCAAATCAATAAACATAATCCAGCATATAAACAGAACCAAAGACAAGAACCACATGATTATCTCAATTGATGCAGAAAAGGCTTTTGACAAAATTCAACAGCCCTTCATGCTAAAAACGCTCAATAAATTCGGTATTGATGGAACGTACCTCAAAATAATAAGAGCTATTTATGACAAACCCACAGCCAATATCATACTGAATGGGCAAAAACTGGAAAAATTCCCTTTGAAAACTGGCACAAGACAGGGATGCCCTCTCTCACCACTCCTATTCAACATAGTGTTGGAAGTTCTGGCTAGGGCAATCAGGCAAGAGAAAGAAATCAAGGGTATTCAGTTAGGAAAAGAAGAAGTCAAATTGTCCCTGTTTGCAGATGACATGATTGTATATTTAGAAAACCCCATTGTCTCAGCCCAAAATCTCCTTAAGCTGATAAGCAACTTCAGCAAAGTCTCAGGATACAAAATTAATGTGCAAAAATCACAAGCATTCTTATACACCAGTAACAGACAAACAGAGAGCCAAATCAGGAATGAACTTCCATTCACAGTTGCTTCAAAGAGAATCAAATACCTAGGAATCCAACTTACAAGGGATGTAAAGGACCTCTTCAAGGAGAACTACAAACCACTGCTCAGTGAAATCAAAGAGGACACAAACAAATGGAAGAACATACCATGCTCATGGATAGGAAGAATCAATATTGTGAAAATGGCCATACTGCCCAAGGTAATTTATAGATTCAATGCCATCCCCATCAAGCTACCAATGAGTTTCTTCACAGAGTTGGAAAAAACTACTTTAAAGTTCATATGGAACCAAAAAAGAGCCCGCATCTCCAAGACAATCCTAAGTCAAAAGAACAAAGCTGGAGGCATCACGCTACCTGACTTCAAACTATACTACAAGGCTACAGTAACCAAAACAGCATGGTACTGGTACCAAAACAGAGATATAGACCAATGGAACAGAACAGAGTCCTCAGAAATAATACCACACATCTACAGCCATTTGATCTTTGACAAACCTGAGAGAAACAAGAAATGGGGAAAGGATTCCCTATTTAATAAATGGTGCTGGGAAAATTGGCTAGCCATAAGTAGAAAGCTGAAACTGGATCCTTTCCTTACTCCTTATACGAAAATTAATTCAAGATGGATTAGAGACTTAAATGTTAGACCTAATACCATAAAAATCCTAGAGGAAAACCTAGGTAGTACCATTCAGGACATAGGCATGGGCAAAGATTTCATGTCTAAAACACCAAAAGCAACGGCAGCAAAAGCCAAAATTGACAAATGGGATCTCATTAAACTAAAGAGCTTCTGCACAGCAAAAGACACTACCATCAGAGTGAACAGGCAACCTACAGAATGGGAGAAAATTTTTGCAATCTACTCATCTGACAAAGGGCTTATATCCAGAACCTACAAAGAACTCAAACAAATTTACAAGAAAAAAACAAACAACCCCATCAAAAAGTGGGCAAAGGACATGAACAGACATTTCTCAAAAGAAGACATTCATACAGCCAACAGACACATGAAAAAATGCTCATCATCACTGGCCATCAGAGAAATGCAAATCAAAACCACAATGAGATACCATCTCACACCAGTTAGAATGGCAATCATTAAAAAGTCCGGAAACAACAGGTGCTGGAGAGGATGTGGAGAAATAGGAACACTTTTACACTGTTGGTGGGATTGTAAACTAGTTCAACCATTATGGAAAACAGTATGGCGATTCCTCAAGGATCTAGAACTAGATGTACCATATGACCCAGCCATCCCATTACTGGGTATATACCCAAAGGATTATAAATTATGCTGCTATAAAGACACATGCACACGTATGTTTATTGCAGCACTATTCACAATAGCAAAGACTTGGAATCAACCCAAATGTCCATCAGTGACAGATTGGATTAAGAAAATGTGGCACATATACACCATGGAATACTATGCAGCCATAAAAAAGGATGAGTTTGATTCCTTTGTAGGGACTTGGATGCAGCTGGAATCCATCATTCTTAGCAAACTATCACAAGAACAGAAAACCAAACACCGCATGTTCTCACTCATAGGTGGGAACTGAacaatgagatcactcggactcaggaaggggaacatcacacaccggggcctatcatggggaggggggaggggggagggattgcattgggagttatacctgatgtaaatgacgagttgatgggtgcagcacagcaacatggcacaagtatacatatgtaacaaacctgcacgttatgcacatgtaccctacaacttaaagtataataataataaataaattaaaaaaaaaaaaaaaaaaaGATGTTAATGGGAAACTGGATGAGGAGTATATGGGAACTTTCTGTACCATCTTCACATTTTTGCTATATAACTAAAATTGTCCTAAAATAAACATTTATTTTAAAATAAAGTCAAAGTAGACTGGGCATGGTGG

Sequencing traces extracted from the attached Sanger_seq files (manually curated nucleotides are in lower case).

>L1RS2PRMD4_PCR_Chr11-5GNM-Fw

ATAGGAGCAGCTCCAGTCTCCAACTCCCAGCGCCAGCGACACAGAAGACCGGTGATTTCTGCATTTTCAACTGAGGTACTGGGTTCATCTCACTGGGGAGTGCCGGACGATCGGTGCTGGTCAGCTGCTGCAGCCCGACCAGCGAGAGCTGAAGCAGGGCGAGGCATTGCCTCACCTGGGAAGCGCAAGGGGGAAGGGAGTCCCTTTTCCTAGCCAGGGGAACTGAGACACACAACACCTGGAAAATCGGGTAACTCCCACCCCAATACTGCGCTTTAGGAAACAGGCACACCAGGAGATCATATCCCACACCTGGCCGGGAGGGTCCCACACCCACGGAGCCTCCCTCGTTGCTAGCGCAGCAGTCTGTGATCTACCGGCAAGGCAGCAGCGAGGCTGGGGGAGGGGCGCCCGCCATTGCTGAGGCTTAAGTAGGTAAACAAAGCTGCTGGGAAGCTCGAACTGGGTGGAGCTCACAGCAGCTCAAGGAAACCTGCCTGTCTCTGTAGACTCCACCTCTGGGGACAGGGCACAGTAAACTAAGACACACAGACACCTCTGCACAGACGCAAACGACTCTGTCTGACAGCTTTGAAGAGAGCAGTG

>L1RS2PRMD4_PCR_114R

GGACAGTAGGCGGAGTTGAGATTTGATGTCAGAGGGGGGCGGAGCAAGATGGCCGAATAGGAGCAGCTCCAGTCTCCAACTCCCAGCGCCAGCGACACAGAAG

>L1RS2PRMD4_PCR_476F

ACTCCACCTCTGGGGACAGGGCACAGTAAACTAAGACACACAGACACCTCTGCACAGACGCaAACGACTCTGTCTGACAGCTTTGAAGAGAGCAGTGGATCtCCCAACACGGAGGTTGAGATCTGAGAAGGGACAGACTCCcTGCTCAAGCGGGTCCCTGACCCCTGAGTAGCCTAACTGGGAGACAtCCCCCACTAGGGGCAGTCTGACACCCcACACCTCACAGGGAGGAGTACACCCCTGAGAGGAAGCTTCCAAAGCaAGAATCAGACAGGTACACTCGCTGTTCAGAAATATTCTATCTTCTGCAGCCTCTGCTGCTGATACCCAGGCAAACAGGGTCTGGAGTGGACCTCAAGCAATCTCCaACAGACCtACAGCTGAGGGTCCTGACTGTTAGAAGGAAAACTGTCAAACAGGAAGGACACCTACACCaAAACCCCATCAGtACATCACCATCATCaAAGACCAGAGGCAGATaAAACCACAAAGATGGGGAAAAAGCAGGGCAGAAAAGCTGGAAATTCAAAAAATAAGAGCGCATCTCCCCCGGCAAAGGAGCGCAGCTCATCGCCAGCAaCGGATCAAA

>L1RS2PRMD4_PCR_1008F

AGCGCATCTCCCCCGGCAAAGGAGCGCAGCTCATCGCCAGCAACGGATCAAAGCTGGACGGAGAATGACTTTGACGAGATGAGAGAAGAAGGCTTCAGTCCTTCAAATTTCTCAGAGCTAAAGGAGGAATTACGTACCCAGCGCAAAGAAACTAAAAATCTTGAAAAAAAAGTGGAAGAATTGATGGCTAGAGTAATTAATGCAGAGAAGGTCCTAAACGAAATGAAAGAGATGAAAACCATGACACGAGAAATACGTGACAAATGCACAAGCTTCAGTAACCGACTCGATCAACTGGAAGAAAGAGTATCAGCGATTGAGGATCAAATGAATGAAATGAAGCGAGAAGAGAAACCAAAAGAAAAAAGAAGAAAAAGAAACGAACAAAGCCTGCAAGAAGTATGGGATTATGTAAAAAGACCAAATCTACGTCTGATTGGGGTGCCTGAAAGTGAGGGGGAAAATGGAACCAAGTTGGAAAACACTCTTCAGGATATCATCCAGGAGAACTTCCCCAACCTAGTAGGGCAGGCCAACATTCAAATCCAGGAAATACAGAGAACGCCACAAAGATACTCCTCGAGAAGAGCAACTCCAAGACACATAATTGCCAGATTCACCAAAGTTGAAATGAAGGAAAAAATCTTAAGGGCA

>L1RS2PRMD4_PCR_1615F

CACATAATTGCCAGATTCACCAAAGTTGAAATGAAGGAAAAAATCTTAAGGgCAgCCAGAGAGAAAGGTCGGGTTACCCACAAAGGGAAGCCCATCAGACTAACAGCAGATCTCTCAGCAGAAACTCTACAAGCCAGAAGAGAGTGGGGGCCAATATTCAACATTCTTAAAGAAAAGAATTTTAAACCCAGAATTTCATATCCAGCCAAACTAAGTTTCATAAGTGAAGGAGAAATAAAATCCTTTACAGATAAGCAAATGCTTAGAGATTTTGTCACCACTAGGCCTGCCTTACAAGAGATC

>L1RS2PRMD4_PCR_2056F

GGCAGGATCAAGTTCACACATAACAATATTAACCTTAAATGTAAATGGACTAAATGCTCCAATTAAAAGACACAGACTGGCAAACTGGATAAAGAGTCAAGACCCATCAGTCTGCTGTATTCAGGAGACCCATCTCACACGCAGAGACATACATAGGCTCAAAATAAAGGGATGGAGGAAGATTTACCAAGCAAATGGAGAACAAAAAAAAGCAGGGGTTGCAATACTAGTCTCTGATAAAACAGACTTTAAACCATCAAAGATCAAAAGAGACAAAGAAGGCCATTACATAATGGTAAAGGGATCAATTCAACAGGAAGAGCTAACTATCCTAAATATATATGCACCCAATACAGGAGCACCCAGATTCATAAAGCAAGTCCTTAGAGACTTACAAAGAGACTTAGACTCCCATACAATAATAATGGGAGACTTCAACACTCCACTGTCAACATTAGACAGATCAACGAGACAGAAAGTTAACAAGGATATCCAGGAATTGAACTCATCTCTGCAGCAAGCAGACCTAATAGACATCTACAGAACTCTCCACCCCAAATCAACAGAATATACATTCTTCTCAGCACCACATCATACTTA

>L1RS2PRMD4_PCR_2388R

GAGAAGAGCAACTCCAAGACACATAATTGCCAGATTCACCAAAGTTGAAATGAAGGAAAAAATCTTAAGGGCAGCCAGAGAGAAAGGTCGGGTTACCCACAAAGGGAAGCCCATCAGACTAACAGCAGATCTCTCAGCAGAAACTCTACAAGCCAGAAGAGAGTGGGGGCCAATATTCAACATTCTTAAAGAAAAGAATTTTAAACCCAGAATTTCATATCCAGCCAAACTAAGTTTCATAAGTGAAGGAGAAATAAAATCCTTTACAGATAAGCAAATGCTTAGAGATTTTGTCACCACTAGGCCTGCCTTACAAGAGATCCTGAAGGAAGCACTAAACATGGAAAGGAACAACCGGTACCAGCCATTGCAAAAACATGCCAAAATGTAAAGACCATTGAGGCTAGGAAGAAACTGCATCAACTAATGAGCAAAATAACCAGTTAATATCATAATGGCAGGATCAAGTTCACACATAACAATATTAACCTTAAATGTAAATGGACTAAATGCTCCAATTAAAAGACACAGACTGGCAAACTGGATAAAGAGTCAAGACCCATCAGTCTGCTGTATTCAGGAGACCCATCTCACACGCAGAGACATACATAGGCTCAAAATAAAGGGATGGAGGAAGATTTACCAAGCAAATGGAGAACAAAAAAAAGCAGGGGTTGCAA

>L1RS2PRMD4_PCR_2646F

ATCATACTTACTCCAAAATTGACCACGTAATTGGAAGTAAAGCACTCCTCAGCAAATGTACAAGAACAGAAATTATAACAAACTGTCTCTCAGACCaCaGTGCAATCAAATTAGAACTCAGGACTAAGACACTCAATCAAAACCGCTCAACTACATGGAAACTGAACAACCTGCTCCTGAATGACTACTGGGTACATAACGAAATGAAGGCAGAAATAAAGATGTTCTTTGAAACCAATGAGAACAAAGATACAACATACCAGAATCTCTGGGACACATTTAAAGCAGTGTGTAGAGGGAAATTTATAGCACTAAATGCCCACAAGAGAAAGCAGGAAAGATGTAAAATTGACACTCTAACATCGCAATTAAAAGAACTAGAGAAGCAAGAGCAAACACATTCGAAAGCTAGCAGAAGGCAAGAAATAACTAAGATCAGAGCAGAACTGAAGGAGATAGAAACACAAAAAACCCTCCAAAAAATCAATGAATCCAGGAGTTGGTTTTTTGAAAAGATCAACAAAATTG

>L1RS2PRMD4_PCR_3106F

ACACAAAAAACCCTCCAAAAAATCAATGAATCCAGGAGTTGGTTTTTTGAAAAGATCAACAAAATTGACAGACCACTAGCCAGACTAATAAAGAAGAAAAGAGAGAAGAATCAAATCGACGCAATAAAAAATGATAAAGGGGATATCACCACCGACCCCACAGAAATACAAACTACCATCAGAGAATACTATAAACACCTCTACGCAAATAAACTGGAAAATCTAGAAGAAATGGATAATTTCCTGGACACTTACACTCTTCCAAGACTAAACCAGGAAGAAGTTGAATCCCTGAATAGACCAATAGCAGGCTCTGAAATTGAGGCAACAATTAATAGCCTACCAACCAAAAAAAGTCCAGGACCAGATGGATTCACAGCTGAATTCTACCAGAGGTACAAAGAGGAGTTGGTACCATTCCTTCTGAAACTATTCCAATCAATAGAAAAAGAGGGAATCCTCCCTAACTCATTTTATGAGGCCAACATCATCCTGATACC

>L1RS2PRMD4_PCR_3719F

AGCTTATCCACCATGATCAAGTGGGCTTCATCCCTGGGATGCAAGGCTGGTTCAACATTCGCAAATCAATAAACATAATCCAGCATATAAACAGAACCAAAGACAAGAACCACATGATTATCTCAATTGATGCAGAAAAGGCTTTTGACAAAATTCAACAGCCCTTCATGCTAAAAACGCTCAATAAATTCGGTATTGATGGAACGTACCTCAAAATAATAAGAGCTATTTATGACAAACCCACAGCCAATATCATACTGAATGGGCAAAAACTGGAAAAATTCCCTTTGAAAACTGGCACAAGACAGGGATGCCCTCTCTCACCACTCCTATTCAACATAGTGTTGGAAGTTCTGGCTAGGGCAATCAGGCAAGAGAAAGAAATCAAGGGTATTCAGTTAGGAAAAGAAGAAGTCAAATTGTCCCTGTTTGCAGATGACATGATTGTATATTTAGAAAACCCCATTGTCTCAGCCCAAAATCTCCTTAAGCTGATAAGCAACTTCAGCAAAGTCTCAGGATACAAAATTAATGTGCAAAAATCACAAGCATTCTTATACACCAGTAACAGACAAACAGAGAGCCAAATCAGGAATGAACTTCCATTCACAGTTGCTTCAAAGAGAATCAAATACCTAGGAATCCAACTTACAAGGGATGTAAAGGACCTCTTCAAGGAGAACTACAAACCACTGCTCAGTGAAATCAAAGAGGACACAAACAAATGGAAGAACATACCATGCTCATG

>L1RS2PRMD4_PCR_3977R

GACCCCACAGAAATACAAACTACCATCAGAGAATACTATAAACACCTCTACGCAAATAAACTGGAAAATCTAGAAGAAATGGATAATTTCCTGGACACTTACACTCTTCCAAGACTAAACCAGGAAGAAGTTGAATCCCTGAATAGACCAATAGCAGGCTCTGAAATTGAGGCAACAATTAATAGCCTACCAACCAAAAAAAGTCCAGGACCAGATGGATTCACAGCTGAATTCTACCAGAGGTACAAAGAGGAGTTGGTACCATTCCTTCTGAAACTATTCCAATCAATAGAAAAAGAGGGAATCCTCCCTAACTCATTTTATGAGGCCAACATCATCCTGATACCAAAGCCTGGCAGAGACACAACAAAAAAAGAGAATTTTAGACCAATATCCCTGATGAACATCGATGCAAAAATCCTCAATAAAATACTGGCAAACCGGATTCAGCAACACATCAAAAAGCTTATCCACCATGATCAAGTGGGCTTCATCCCTGGGATGCAAGGCTGGTTCAACATTcGCAAATCAATAAACATAATCCAGCATATAAACAGAACCAAAGACAAGAACCACATGATTATCTCAATTGATGCAGAAAAGGCTT

>L1RS2PRMD4_PCR_4311F

ACTTCCATTCACAGTTGCTTCAAAGAGAATCAAATACCTAGGAATCCaACTTACAAGGGATGTAAAGGACCTCTTCAAGGAGAACTACaAACCACTGCTCAGTGAAATCAAAGAGGACACAAACAAATGGAAGAACATACCATGCTCATGGATAGGAAGAATCAATATTGTGAAAATGGCCATACTGCCCAAGGTAATTTATAGATTCAATGCCATCCCCATCAAGCTACCAATGAGTTTCTTCACAGAGTTGGAAAAAACTACTTTAAAGTTCATATGGAACCAAAAAAGAGCCCGCATCTCCAAGACAATCCTAAGTCAAAAGAACAAAGCTGGAGGCATCACGCTACCTGACTTCAAACTATACTACAAGGCTACAGTAACCAAAACAGCATGGTACTGGTACCAAAACAGAGATATAGACCAATGGAACAGAACAGAGTCCTCAGAAATAATACCACACATcTACAGCCATTTGATCTTTGACAAACCTGAGAGAAACAAGAAATGGGGAAAGGATTCCCTATTTAATAAATGGTGCTGGGAAAATTGGCTAGCCATAAGTAGAAAGCTGAAACTGGATCCTTTCCTTACTCCTTATACGAAAATTAATTCAAGATGGATTAGAGACTTAAATGTTAGACCTAATACCATAAAAATCCTAGAGGAAAACCTAGGTAGTACCATTC

>L1RS2PRMD4_PCR_4525F

ATGCCATCCCCATCAAGCTACCAATGAGTTTCTTCACAGAGTTGGAAAAAACTACTTTAAAGTTCATATGGAACCAAAAAAGAGCCCGCATCTCCAAGACAATCCTAAGTCAAAAGAACAAAGCTGGAGGCATCACGCTACCTGACTTCAAACTATACTACAAGGCTACAGTAACCAAAACAGCATGGTACTGGTACCAAAACAGAGATATAGACCAATGGAACAGAACAGAGTCCTCAGAAATAATACCACACATCTACAGCCATTTGATCTTTGACAAACCTGAGAGAAACAAGAAATGGGGAAAGGATTCCCTATTTAATAAATGGTGCTGGGAAAATTGGCTAGCCATAAGTAGAAAGCTGAAACTGGATCCTTTCCTTACTCCTTATACGAAAATTAATTCAAGATGGATTAGAGACTTAAATGTTAGACCTAATACCATAAAAATCCTAGAGGAAAACCTAGGTAGTACCATTCAGGACATAGGCATGGGCAAAGATTTCATGTCTAAAACACCAAAAGCAACGGCAGCAAAAGCCAAAATTGACAAATGGGATCTCATTAAACTAAAGAGCTTCTGCACAGCAAAAGACACTACCATCAGAGTGAACAGGCAACCTACAGAATGGGAGAAAATTTTTGCAATCTACTCATCTGACAAAGGGCTTATATCCAGAACCTACAAAGAACTCAAACAAATTTACAAGAAAAAAACAAACAACCCCATCAAAAAGTGGGCAAAGGACATGAACAGACATTTCTCAAAAGAAGAC

>L1RS2PRMD4_PCR_4548R

TCATCCCTGGGATGCAAGGCTGGTTCAACATTCGCAAATCAATAAACATAAtcCAGCATATAAACAGAACCAAAGACAAGAACCACATGATTATCTCAATTGATGCAGAAAAGGCTTTTGACAAAATTCAACAGCCCTTCATGCTAAAAACGCTCAATAAATTCGGTATTGATGGAACGTACCTCAAAATAATAAGAGCTATTTATGACAAACCCACAGCCAATATCATACTGAATGGGCAAAAACTGGAAAAATTCCCTTTGAAAACTGGCACAAGACAGGGATGCCCTCTCTCACCACTCCTATTCAACATAGTGTTGGAAGTTCTGGCTAGGGCAATCAGGCAAGAGAAAGAAATCAAGGGTATTCAGTTAGGAAAAGAAGAAGTCAAATTGTCCCTGTTTGCAGATGACATGATTGTATATTTAGAAAACCCCATTGTCTCAGCCCAAAATCTCCTTAAGCTGATAAGCAACTTCAGCAAAGTCTCAGGATACAAAATTAATGTGCAAAAATCACAAGCATTCTTATACACCAGTAACAGACAAACAGAGAGCCAAATCAGGAATGAACTTCCATTCACAGTTGCTTCAAAGAGAATCAAATACCTAGGAATCCAACTTACAAGGGATGTAAAGGACCTCTTCAAGGAGAACTACAAACCACTGCTCAGTGAAATCAAAGAGGACACAAACAAA

>L1RS2PRMD4_PCR_4891F

GGATCCTTTCCTTACTCCTTATACGAAAATTAATTCAAGATGGATTAGAGACTTAAATGTTAGACCTAATACCATAAAAATCCTAGAGGAAAACCTAGGTAGTACCATTCAGGACATAGGCATGGGCAAAGATTTCATGTCTAAAACACCAAAAGCAACGGCAGCAAAAGCCAAAATTGACAAATGGGATCTCATTAAACTAAAGAGCTTCTGCACAGCAAAAGACACTACCATCAGAGTGAACAGGCAACCTACAGAATGGGAGAAAATTTTTGCAATCTACTCATCTGACAAAGGGCTTATATCCAGAACCTACAAAGAACTCAAACAAATTTACAAGAAAAAAACAAACAACCCCATCAAAAAGTGGGCAAAGGACATGAACAGACATTTCTCAAAAGAAGACATTCATACAGCCAACAGACACATGAAAAAATGCTCATCATCACTGGCCATCAGAGAAATGCAAATCAAAACCACAATGAGATACCATCTCACACCAGTTAGAATGGCAATCATTAAAAAGTCCGGAAACAACAGGTGCTGGAGAGGATGTGGAGAAATAGGAACACTTTTACACTGTTGGTGGGATTGTAAACTAGTTCAACCATTATGGAAAACAGTATGGCGATTCCTCAAGGATCTAGAACTAGATGTACCATATGACCCAGCCATCCCATTACTGGGTATATACCCAAAGGATTATAAATTATGCTGCTATAAAGACACATGCACACGTATGTTTATTGCAGCACTATTCA

>L1RS2PRMD4_PCR_5479F

CTGTTGGTGGGATTGTAAACTAGTTCAACCATTATGGAAAACAGTATGGCGATTCCTCAAGGATCTAGAACTAGATGTACCATATGACCCAGCCATCCCATTACTGGGTATATACCCAAAGGATTATAAATTATGCTGCTATAAAGACACATGCACACGTATGTTTATTGCAGCACTATTCACAATAGCAAAGACTTGGAATCAACCCAAATGTCCATCAGTGACAGATTGGATTAAGAAAATGTGGCACATATACACCATGGAATACTATGCAGCCATAAAAAAGGATGAGTTTGATTCCTTTGTAGGGACTTGGATGCAGCTGGAATCCATCATTCTTAGCAAACTATCACAAGAACAGAAAACCAAACACCGCATGTTCTCACTCATAGGTGGGAACTGAACAATGAGATCACTCGGACTCAGGAAGGGGAACATCACACACCGGGGCCTATCATGGGGAGGGGGGAGGGGGGAGGGATTGCATTGGGAGTTATACCTGATGTAAATGACGAGTTGATGGGTGCAGCACAGCAAC

>L1RS2PRMD4_PCR_5755F

GATGAGTTTGATTCCTTTGTAGGGACTTGGATGCAGCTGGAATCCATCATTCTTAGCAAACTATCACAAGAACAGAAAACCAAACACCGCATGTTCTCACTCATAGGTGGGAACTGAACAATGAGATCACTCGGACTCAGGAAGGGGAACATCACACACCGGGGCCTATCATGGGGAGGGGGGAGGGGGGAGGGATTGCATTGGGAGTTATACCTGATGTAAATGACGAGTTGATGGGTGCAGCACAGCAACATGGCACAAGTATACATATGTAACAAACCTGCACGTTATGCACATGTACCCTACAACTTAAAGTATAATAATAATAAATAAATTAAAAAAAAAAAAAAAAAAAA

>L1RS2PRMD4_PCR_6011F

CATGGCACAAGTATACATATGTAACAAACCTGCACGTTATGCACATGTACCCTACAACTTAAAGTATAATAATAATAAATAAATTAAAAAAAAAAAAAAAAAA

>L1RS2PRMD4_PCR_Crhr11-3GNM-Rv

AAAAAAAAAAAAAAAAAGATGTTAATGGGAAACTGGATGAGGAGTATATGGGAACTTTCTGTACCATCTTCACATTTTTGCTATATAACTAAAAT
