# Supplementary material for: Somatic retrotransposition in the developing rhesus macaque brain
Source: HighWire-hosted journal article supplement (doi:10.1101/gr.276451.121), 2022-06-21
Supplement: Supplemental_File_S1.zip [file L1RS2SOM_PCR.docx]

CTTGCGGCCGCTGATAATATAGCCCATAATAGAGAGgggggcggagcaagatggccgaataggagcagctccagtctccaactcccagcgccagcgacacagaagaccggtgatttctgcattttcaactgaggtactgggttcatctcactggggagtgccggacgatcggtgctggtcagctgctgcagcccgaccagcgagagctgaagcagggcgaggcattgcctcacctgggaagcgcaagggggaagggagtcccttttcctagccaggggaactgagacacacaacacctggaaaatcgggtaactcccaccccaatactgcgctttaggaaacaggcacaccaggagatcatatcccacacctggccgggagggtcccacacccacggagcctccctcgttgctagcgcagcagtctgtgatctaccggcaaggcagcagcgaggctgggggaggggcgcccgccattgctgaggcttaagtaggtaaacaaagctgctgggaagctcgaactgggtggagctcacagcagctcaaggaaacctgcctgtctctgtagactccacctctggggacagggcacagtaaactaagacacacagacacctctgcacagacgcaaacgactctgtctgacagctttgaagagagcagtggatctcccaacacggaggttgagatctgagaagggacagactccctgctcaagcgggtccctgacccctgagtagcctaactgggagacatcccccactaggggcagtctgacaccccacacctcacagggaggagtacacccctgagaggaagcttccaaagcaagaatcagacaggtacactcgctgttcagaaatattctatcttctgcagcctctgctgctgatacccaggcaaacagggtctggagtggacctcaagcaatctccaacagacctacagctgagggtcctgactgttagaaggaaaactgtcaaacaggaaggacacctacaccaaaaccccatcagtacatcaccatcatcaaagaccagaggcagataaaaccacaaagATGGGGAAAAAGCAGGGCAGAAAAGCTGGAAATTCAAAAAATAAGAGCGCATCTCCCCCGGCAAAGGAGCGCAGCTCATCGCCAGCAACGGATCAAAGCTGGACGGAGAATGACTTTGACGAGATGAGAGAAGAAGGCTTCAGTCCTTCAAATTTCTCAGAGCTAAAGGAGGAATTACGTACCCAGCGCAAAGAAACTAAAAATCTTGAAAAAAAAGTGGAAGAATTGATGGCTAGAGTAATTAATGCAGAGAAGGTCCTAAACGAAATGAAAGAGATGAAAACCATGACACGAGAAATACGTGACAAATGCACAAGCTTCAGTAACCGACTCGATCAACTGGAAGAAAGAGTATCAGCGATTGAGGATCAAATGAATGAAATGAAGCGAGAAGAGAAACCAAAAGAAAAAAGAAGAAAAAGAAACGAACAAAGCCTGCAAGAAGTATGGGATTATGTAAAAAGACCAAATCTACGTCTGATTGGGGTGCCTGAAAGTGAGGGGGAAAATGGAACCAAGTTGGAAAACACTCTTCAGGATATCATCCAGGAGAACTTCCCCAACCTAGTAGGGCAGGCCAACATTCAAATCCAGGAAATACAGAGAACGCCACAAAGATACTCCTCGAGAAGAGCAACTCCAAGACACATAATTGCCAGATTCACCAAAGTTGAAATGAAGGAAAAAATCTTAAGGGCAGCCAGAGAGAAAGGTCGGGTTACCCACAAAGGGAAGCCCATCAGACTAACAGCAGATCTCTCAGCAGAAACTCTACAAGCCAGAAGAGAGTGGGGGCCAATATTCAACATTCTTAAAGAAAAGAATTTTAAACCCAGAATTTCATATCCAGCCAAACTAAGTTTCATAAGTGAAGGAGAAATAAAATCCTTTACAGATAAGCAAATGCTTAGAGATTTTGTCACCACTAGGCCTGCCTTACAAGAGATCCTGAAGGAAGCACTAAACATGGAAAGGAACAACCGGTACCAGCCATTGCAAAAACATGCCAAAATGTAAagaccattgaggctaggaagaaactgcatcaactaatgagcaaaataaccagttaatatcataATGGCAGGATCAAGTTCACACATAACAATATTAACCTTAAATGTAAATGGACTAAATGCTCCAATTAAAAGACACAGACTGGCAAACTGGATAAAGAGTCAAGACCCATCAGTCTGCTGTATTCAGGAGACCCATCTCACACGCAGAGACATACATAGGCTCAAAATAAAGGGATGGAGGAAGATTTACCAAGCAAATGGAGAACAAAAAAAAGCAGGGGTTGCAATACTAGTCTCTGATAAAACAGACTTTAAACCATCAAAGATCAAAAGAGACAAAGAAGGCCATTACATAATGGTAAAGGGATCAATTCAACAGGAAGAGCTAACTATCCTAAATATATATGCACCCAATACAGGAGCACCCAGATTCATAAAGCAAGTCCTTAGAGACTTACAAAGAGACTTAGACTCCCATACAATAATAATGGGAGACTTCAACACTCCACTGTCAACATTAGACAGATCAACGAGACAGAAAGTTAACAAGGATATCCAGGAATTGAACTCATCTCTGCAGCAAGCAGACCTAATAGACATCTACAGAACTCTCCACCCCAAATCAACAGAATATACATTCTTCTCAGCACCACATCATACTTACTCCAAAATTGACCACGTAATTGGAAGTAAAGCACTCCTCAGCAAATGTACAAGAACAGAAATTATAACAAACTGTCTCTCAGACCACAGTGCAATCAAATTAGAACTCAGGACTAAGACACTCAATCAAAACCGCTCAACTACATGGAAACTGAACAACCTGCTCCTGAATGACTACTGGGTACATAACGAAATGAAGGCAGAAATAAAGATGTTCTTTGAAACCAATGAGAACAAAGATACAACATACCAGAATCTCTGGGACACATTTAAAGCAGTGTGTAGAGGGAAATTTATAGCACTAAATGCCCACAAGAGAAAGCAGGAAAGATGTAAAATTGACACTCTAACATCGCAATTAAAAGAACTAGAGAAGCAAGAGCAAACACATTCGAAAGCTAGCAGAAGGCAAGAAATAACTAAGATCAGAGCAGAACTGAAGGAGATAGAAACACAAAAAACCCTCCAAAAAATCAATGAATCCAGGAGTTGGTTTTTTGAAAAGATCAACAAAATTGACAGACCACTAGCCAGACTAATAAAGAAGAAAAGAGAGAAGAATCAAATCGACGCAATAAAAAATGATAAAGGGGATATCACCACCGACCCCACAGAAATACAAACTACCATCAGAGAATACTATAAACACCTCTACGCAAATAAACTGGAAAATCTAGAAGAAATGGATAATTTCCTGGACACTTACACTCTTCCAAGACTAAACCAGGAAGAAGTTGAATCCCTGAATAGACCAATAGCAGGCTCTGAAATTGAGGCAACAATTAATAGCCTACCAACCAAAAAAAGTCCAGGACCAGATGGATTCACAGCTGAATTCTACCAGAGGTACAAAGAGGAGTTGGTACCATTCCTTCTGAAACTATTCCAATCAATAGAAAAAGAGGGAATCCTCCCTAACTCATTTTATGAGGCCAACATCATCCTGATACCAAAGCCTGGCAGAGACACAACAAAAAAAGAGAATTTTAGACCAATATCCCTGATGAACATCGATGCAAAAATCCTCAATAAAATACTGGCAAACCGGATTCAGCAACACATCAAAAAGCTTATCCACCATGATCAAGTGGGCTTCATCCCTGGGATGCAAGGCTGGTTCAACATTCGCAAATCAATAAACATAATCCAGCATATAAACAGAACCAAAGACAAGAACCACATGATTATCTCAATTGATGCAGAAAAGGCTTTTGACAAAATTCAACAGCCCTTCATGCTAAAAACGCTCAATAAATTCGGTATTGATGGAACGTACCTCAAAATAATAAGAGCTATTTATGACAAACCCACAGCCAATATCATACTGAATGGGCAAAAACTGGAAAAATTCCCTTTGAAAACTGGCACAAGACAGGGATGCCCTCTCTCACCACTCCTATTCAACATAGTGTTGGAAGTTCTGGCTAGGGCAATCAGGCAAGAGAAAGAAATCAAGGGTATTCAGTTAGGAAAAGAAGAAGTCAAATTGTCCCTGTTTGCAGATGACATGATTGTATATTTAGAAAACCCCATTGTCTCAGCCCAAAATCTCCTTAAGCTGATAAGCAACTTCAGCAAAGTCTCAGGATACAAAATTAATGTGCAAAAATCACAAGCATTCTTATACACCAGTAACAGACAAACAGAGAGCCAAATCAGGAATGAACTTCCATTCACAGTTGCTTCAAAGAGAATCAAATACCTAGGAATCCAACTTACAAGGGATGTAAAGGACCTCTTCAAGGAGAACTACAAACCACTGCTCAGTGAAATCAAAGAGGACACAAACAAATGGAAGAACATACCATGCTCATGGATAGGAAGAATCAATATTGTGAAAATGGCCATACTGCCCAAGGTAATTTATAGATTCAATGCCATCCCCATCAAGCTACCAATGAGTTTCTTCACAGAGTTGGAAAAAACTACTTTAAAGTTCATATGGAACCAAAAAAGAGCCCGCATCTCCAAGACAATCCTAAGTCAAAAGAACAAAGCTGGAGGCATCACGCTACCTGACTTCAAACTATACTACAAGGCTACAGTAACCAAAACAGCATGGTACTGGTACCAAAACAGAGATATAGACCAATGGAACAGAACAGAGTCCTCAGAAATAATACCACACATCTACAGCCATTTGATCTTTGACAAACCTGAGAGAAACAAGAAATGGGGAAAGGATTCCCTATTTAATAAATGGTGCTGGGAAAATTGGCTAGCCATAAGTAGAAAGCTGAAACTGGATCCTTTCCTTACTCCTTATACGAAAATTAATTCAAGATGGATTAGAGACTTAAATGTTAGACCTAATACCATAAAAATCCTAGAGGAAAACCTAGGTAGTACCATTCAGGACATAGGCATGGGCAAAGATTTCATGTCTAAAACACCAAAAGCAACGGCAGCAAAAGCCAAAATTGACAAATGGGATCTCATTAAACTAAAGAGCTTCTGCACAGCAAAAGACACTACCATCAGAGTGAACAGGCAACCTACAGAATGGGAGAAAATTTTTGCAATCTACTCATCTGACAAAGGGCTTATATCCAGAACCTACAAAGAACTCAAACAAATTTACAAGAAAAAAACAAACAACCCCATCAAAAAGTGGGCAAAGGACATGAACAGACATTTCTCAAAAGAAGACATTCATACAGCCAACAGACACATGAAAAAATGCTCATCATCACTGGCCATCAGAGAAATGCAAATCAAAACCACAATGAGATACCATCTCACACCAGTTAGAATGGCAATCATTAAAAAGTCCGGAAACAACAGGTGCTGGAGAGGATGTGGAGAAATAGGAACACTTTTACACTGTTGGTGGGATTGTAAACTAGTTCAACCATTATGGAAAACAGTATGGCGATTCCTCAAGGATCTAGAACTAGATGTACCATATGACCCAGCCATCCCATTACTGGGTATATACCCAAAGGATTATAAATTATGCTGCTATAAAGACACATGCACACGTATGTTTATTGCAGCACTATTCACAATAGCAAAGACTTGGAATCAACCCAAATGTCCATCAGTGACAGATTGGATTAAGAAAATGTGGCACATATACACCATGGAATACTATGCAGCCATAAAAAAGGATGAGTTTGATTCCTTTGTAGGGACTTGGATGCAGCTGGAATCCATCATTCTTAGCAAACTATCACAAGAACAGAAAACCAAACACCGCATGTTCTCACTCATAGGTGGGAACTGAacaatgagatcactcggactcaggaaggggaacatcacacaccggggcctatcatggggaggggggaggggggagggattgcattgggagttatacctgatgtaaatgacgagttgatgggtgcagcacagcaacatggcacaagtatacatatgtaacaaacctgcacgttatgcacatgtaccctacaacttaaagtataataataataaataaattaaaaaaaaaaaaaaaaaaaaaaaaaaaaaaaaaaaaaaaaaaaaaaaaaaaaaaaaaaaaaaaaaaaaaaaaaaaaaaaaaaaaaaaaaaaaaaaaaaaaaaaaaaaaaaaaaaaaaaaaaaaaaaaaaaaaaaaaaaaaaaaaaaaaaaaaaaaaaaaaaaaaTATAGCCCATAATATATCTGAAAGCAAAGAAATTTATAATTAGCTAAAATCAGAGACCAAACCTAACG

Sequencing traces extracted from the attached Sanger_seq files (manually curated nucleotides are in lower case).

>L1RS2SOM_PCR_SOM5J-Fw

GGCCGaATAGGAGCAGCTCCAGTCTCCAACTCCCAGCGCCAGCGACACAGAAGACCGGTGATTTCTGCATTTTCAACTGAGGTACTGGGTTCATCTCACTGGGGAGTGCCGGACGATCGGTGCTGGTCAGCTGCTGCAGCCCGACCAGCGAGAGCTGAAGCAGGGCGAGGCATTGCCTCACCTGGGAAGCGCAAGGGGGAAGGGAGTCCCTTTTCCTAGCCAGGGGAACTGAGACACACAACACCTGGAAAATCGGGTAACTCCCACCCCAATACTGCGCTTTAGGAAACAGGCACACCAGGAGATCATATCCCACACCTGGCCGGGAGGGTCCCACACCCACGGAGCCTCCCTCGTTGCTAGCGCAGCAGTCTGTGATCTACCGGCAAGGCAGCAGCGAGGCTGGGGGAGGGGCGCCCGCCATTGCTGAGGCTTAAGTAGGTAAACAAAGCTGCTGGGAAGCTCGAACTGGGTGGAGCTCACAGCAGCTCAAGGAAACCTGCCTGTCTCTGTAGACTCCACCTCTGGGGACAGGGCACAGTAAACTAAGACACACAGACACCTCTGCACAGACGCAAACGACTCTGTCTGACAGCTTTGAAGAGAGCAGTGGATCTCCCAACACGGAGGTTGAGATCTGAGAAGGGACAGACTCCCTGCTCAAGCGGGTCCCTGACCCCTGAGTAGCCTAACTGGGAGACATCCCC

>L1RS2SOM_PCR_114R

CTTGCGGCCGCTGATAATATAGCCCATAATAGAGAGGGGGGCGGAGCAAGATGGCCGAATAGGAGCAGCTCCAGTCTCCAACTCCCAGCGCCAGCGACACAGAA

>L1RS2SOM_PCR_476F

GTCTCTGTAGACTCCACCTCTGggGACAggGCACAGTAAACTAAGACACACAGACACCTCTGCACAgACGCAAACGACTCTGTCTGACAGCTTTGAAGAGAGCAGTGGATCTCCCAACACGGAGGTTGAGATCTGAGAAGGGACAGACTCCCTGCTCAAGCGGGTCCCTGACCCCTGAGTAGCCTAACTGGGAGACATCCCCCACTAGGGGCAGTCTGACACCCCACACCTCACAGGGAGGAGTACACCCCTGAGAGGAAGCTTCCAAAGCAAGAATCAGACAGGTACACTCGCTGTTCAGAAATATTCTATCTTCTGCAGCCTCTGCTGCTGATACCCAGGCAAACAGGGTCTGGAGTGGACCTCAAGCAATCTCCAACAGACCTACAGCTGAGGGTCCTGACTGTTAGAAGGAAAACTGTCAAACAGGAAGGACACCTACACCAAAACCCCATCAGTACATCACCATCATCAAAGACCAGAGGCAGATAAAACCACAAAGATGGGGAAAAAGCAGGGCAGAAAAGCTGGAAATTCAAAAAATAAGAGCGCATCTCCCCCGGCAAAGGAGCGCAGCTCATCGCCAGCAACGGATCAAAGCTGGACGGAGAATGACTTTGACGAGATGAGAGAAGAAGGCTTCAGTCCTTCAA

>L1RS2SOM_PCR_1008F

AGCGCATCTCCCCCGGcAAAGGAGCGCAGCTCATCGCCAGCAACGGATCAAAGcTGGACGGAGAATGACTTTGACGAGATGAGAGAAGAAGGCTTCAGTCCTTCAAATTTCTCAGAGCTAAAGGAGGAATTACGTACCCAGCGCAAAGAAACTAAAAATCTTGAAAAAAAAGTGGAAGAATTGATGGCTAGAGTAATTAATGCAGAGAAGGTCCTAAACGAAATGAAAGAGATGAAAACCATGACACGAGAAATACGTGACAAATGCACAAGCTTCAGTAACCGACTCGATCAACTGGAAGAAAGAGTATCAGCGATTGAGGATCAAATGAATGAAATGAAGCGAGAAGAGAAACCAAAAGAAAAAAGAAGAAAAAGAAACGAACAAAGCCTGCAAGAAGTATGGGATTATGTAAAAAGACCAAATCTACGTCTGATTGGGGTGCCTGAAAGTGAGGGGGAAAATGGAACCAAGTTGGAAAACACTCTTCAGGATATCATCCAGGAGAACTTCCCCAACCTAGTAGGGCAGGCCAACATTCAAATCCAGGAAATACAGAGAACGCCACAAAGATACTCCTCGAGAAGAGCAACTCCAAGACACATAATTGCCAGATTCACCAAAGTTGAAATGAAGGAAAAAATCTTAAGGGCAGCCAGAGAGAAAGGTCGGGTTACCCACAAAGGGAAGCCCATCAGACTAACAGCAGATCTCTCAGCAGAAACTCTACAAGCCAGA

>L1RS2SOM_PCR_1032R

TGTGATCTACCGGCAAGGCAGCAGCGAGGCTGGGGGAGGGGCGCCCGCCATTGCTGAGGCtTAAGTAgGTAAACAAAGCTGCTGGGAAGCTCGAACTGGGTGGAGCTCACAGCAGCTCAAGGAAACCTGCCTGTCTCTGTAGACTCCACCTCTGGGGACAGGGCACAGTAAACTAAGACACACAGACACCTCTGCACAGACGCAAACGACTCTGTCTGACAGCTTTGAAGAGAGCAGTGGATCTCCCAACACGGAGGTTGAGATCTGAGAAGGGACAGACTCCCTGCTCAAGCGGGTCCCTGACCCCTGAGTAGCCTAACTGGGAGACATCCCCCACTAGGGGCAGTCTGACACCCCACACCTCACAGGGAGGAGTACACCCCTGAGAGGAAGCTTCCAAAGCAAGAATCAGACAGGTACACTCGCTGTTCAGAAATATTCTATCTTCTGCAGCCTCTGCTGCTGATACCCAGGCAAACAGGGTCTGGAGTGGACCTCAAGCAATCTCCAACAGACCTACAGCTGAGGGTCCTGACTGTTAGAAGGAAAACTGTCAAACAGGAAGGACACCTACACCAAAACCCCATCAGTAC

>L1RS2SOM_PCR_1615F

ACACATAATTGCCAGATTCACCAAAGTTGAAATGAAGGAAAAAATCTTAAGGGCAGCCAGAGAGAAAgGTCGGGTTACCCACAAAGGGAAGCCCATCAGACTAACAGCAGATCTCTCAGCAGAAACTCTACAAGCCAGAAGAGAGTGGGGGCCAATATTCAACATTCTTAAAGAAAAGAATTTTAAACCCAGAATTTCATATCCAGCCAAACTAAGTTTCATAAGTGAAGGAGAAATAAAATCCTTTACAGATAAGCAAATGCTTAGAGATTTTGTCACCACTAGGCCTGCCTTACAAGAGATCCTGAAGGAAGCACTAAACATGGAAAGGAACAACCGGTACCAGCCATTGCAAAAACATGCCAAAATGTAAAGACCATTGAGGCTAGGAAGAAACTGCATCAACTAATGAGCAAAATAACCAGTTAATATCATAATGGCAGGATCAAGTTCACACATAACAATATTAACCTTAAATGTAAATGGACTAAATGCTCCAATTAAAAGACACAGACTGGCAAACTGGATAAAGAGTCAAGACCCATCAGTCTGCTGTATTCAGGAGACCCATCTCACACGCAGAGACATACATAGGCTCAAAATAAAGGGATGGAGGAAGATTTACCAAGCAAATGGAGAACAAAAAAAAGCAGGGGTTGCAATACTAGTCTCTGATAAAACAGACTTTAAACCATCAAAGATCAAAAGAGACAAAGAAGGCCATTACATAATGGTAAAGGGATCAAT

>L1RS2SOM_PCR_2388R

GAGAAGAGCAACTCCAAGACACATAATTGCCAGATTCACCAAAGTTGAAATGAAGGAAAAAATCTTAAGGGCAGCCAGAGAGAAAGGTCGGGTTACCCACAAAGGGAAGCCCATCAGACTAACAGCAGATCTCTCAGCAGAAACTCTACAAGCCAGAAGAGAGTGGGGGCCAATATTCAACATTCTTAAAGAAAAGAATTTTAAACCCAGAATTTCATATCCAGCCAAACTAAGTTTCATAAGTGAAGGAGAAATAAAATCCTTTACAGATAAGCAAATGCTTAGAGATTTTGTCACCACTAGGCCTGCCTTACAAGAGATCCTGAAGGAAGCACTAAACATGGAAAGGAACAACCGGTACCAGCCATTGCAAAAACATGCCAAAATGTAAAGACCATTGAGGCTAGGAAGAAACTGCATCAACTAATGAGCAAAATAACCAGTTAATATCATAATGGCAGGATCAAGTTCACACATAACAATATTAACCTTAAATGTAAATGGACTAAATGCTCCAATTAAAAGACACAGACTGGCAAACTGGATAAAGAGTCAAGACCCATCAGTCTGCTGTATTCAGGAGACCCATCTCACACGCAGAGACATACATAGGCTCAAAATAAAGGGATGGAGGAAGaTTTACCAAGCAAATGGAGAACAAAAAAaAGCAG

>L1RS2SOM_PCR_2056F

GTTCACACATAACAATATTAACCTTAAATGTAAATGGACTAAATGCTCCAAtTAAAAGACACAGACTGGCAAACTGGATAAAGAGtCAAgACCCATCAGTCTGCTGTATTCAGGAGACCCATCTCACACGCAGAGACATACATAGGCTCAAAATAAAGGGATGGAGGAAGATTTACCAAGCAAATGGAGAACAAAAAAAAGCAGGGGTTGCAATACTAGTCTCTGATAAAACAGACTTTAAACCATCAAAGATCAAAAGAGACAAAGAAGGCCATTACATAATGGTAAAGGGATCAATTCAACAGGAAGAGCTAACTATCCTAAATATATATGCACCCAATACAGGAGCACCCAGATTCATAAAGCAAGTCCTTAGAGACTTACAAAGAGACTTAGACTCCCATACAATAATAATGGGAGACTTCAACACTCCACTGTCAACATTAGACAGATCAACGAGACAGAAAGTTAACAAGGATATCCAGGAATTGAACTCATCTCTGCAGCAAGCAGACCTAATAGACATCTACAGAACTCTCCACCCCAAATCAACAGAATATACATTCTTCTCAGCACCACATCATACTTACTCCAAAATTGACCACGTAATTGGAAGTAAAG

>L1RS2SOM_PCR_2646F

ACTCCAAAATTGACCACGTAATTGGAAGTAAAGCACTCCTCAGCAAATGTAcAAGAACAGAAATTATAACAAACTGTCTCTCAGACCACAGTGCAATCAAATTAGAACTCAGGACTAAGACACTCAATCAAAACCGCTCAACTACATGGAAACTGAACAACCTGCTCCTGAATGACTACTGGGTACATAACGAAATGAAGGCAGAAATAAAGATGTTCTTTGAAACCAATGAGAACAAAGATACAACATACCAGAATCTCTGGGACACATTTAAAGCAGTGTGTAGAGGGAAATTTATAGCACTAAATGCCCACAAGAGAAAGCAGGAAAGATGTAAAATTGACACTCTAACATCGCAATTAAAAGAACTAGAGAAGCAAGAGCAAACACATTCGAAAGCTAGCAGAAGGCAAGAAATAACTAAGATCAGAGCAGAACTGAAGGAGATAGAAACACAAAAAACCCTCCAAAAAATCAATGAATCCAGGAGTTGGTTTTTTGAAAAGATCAACAAAATTGACAGACCACTAGCCAGACTAATAAAGAAGAAAAGAGAGAAGAATCAAATCGACGCAATAAAAAATGATAAAGGGGATATCACCACCGACCCCACAGAAATACAAACTACCATCAGAGAATACTATAAACACCTCTACGCAAATAAACTGGAAAATC

>L1RS2SOM_PCR_3542R

TCAATCAAAACCGCTCAACTACATGGAAACTGAACAACCTGCTCCTGAATGACTACTGGGTACATAACGAAATGAAGGCAGAAATAAAGATGTTCTTTGAAACCAATGAGAACAAAGATACAACATACCAGAATCTCTGGGACACATTTAAAGCAGTGTGTAGAGGGAAATTTATAGCACTAAATGCCCACAAGAGAAAGCAGGAAAGATGTAAAATTGACACTCTAACATCGCAATTAAAAGAACTAGAGAAGCAAGAGCAAACACATTCGAAAGCTAGCAGAAGGCAAGAAATAACTAAGATCAGAGCAGAACTGAAGGAGATAGAAACACAAAAAACCCTCCAAAAAATCAATGAATCCAGGAGTTGGTTTTTTGAAAAGATCAACAAAATTGACAGACCACTAGCCAGACTAATAAAGAAGAAAAGAGAGAAGAATCAAATCGACGCAATAAAAAATGATAAAGGGGATATCACCACCGACCCCACAGAAATACAAACTACCATCAGAGAATACTATAAACACCTCTACGCAAATAAACTGGAAAATCTAGAAGAAATGGATAATTTCCTGGACACTTACACTCTTCCAAGACTAaACCAGGAAGAAgtTGAATCCCTGAATAGACCAATAGCAGGCT

>L1RS2SOM_PCR_3106F

ACCCTCCAAAAAAtCAATGAATCCAGGAGTTGGTTTTTTGAAAAGATCAACAAAATTGACAgACCACTAGCCAGACTAATAAAGAAGAAAAGAGAGAAGAATCAAATCGACGCAATAAAAAATGATAAAGGGGATATCACCACCGACCCCACAGAAATACAAACTACCATCAGAGAATACTATAAACACCTCTACGCAAATAAACTGGAAAATCTAGAAGAAATGGATAATTTCCTGGACACTTACACTCTTCCAAGACTAAACCAGGAAGAAGTTGAATCCCTGAATAGACCAATAGCAGGCTCTGAAATTGAGGCAACAATTAATAGCCTACCAACCAAAAAAAGTCCAGGACCAGATGGATTCACAGCTGAATTCTACCAGAGGTACAAAGAGGAGTTGGTACCATTCCTTCTGAAACTATTCCAATCAATAGAAAAAGAGGGAATCCTCCCTAACTCATTTTATGAGGCCAACATCATCCTGATACCAAAGCCTGGCAGAGACACAACAAAAAAAGAGAATTTTAGACCAATATCCCTGATGAACATCGATGCAAAAATCCTCAATAAAATACTGGCAAACCGGATTCAGCAACACATCAAAAAGCTTATCCACCATGATCAAGTGGGCTTCATCCCTGGGATGCAAGGCTGGTTCAACATTCGCAAATCAATAA

>L1RS2SOM_PCR_3719F

TCCACCATGATCAAGTGGGCTtCATCCCTGGGATGCAAGGCTGGTTCAACATTCgCAAATCAATAAACATAATCCAGcATATAAACAGAACCAAAGACAAGAACCACATGATTATCTCAATTGATGCAGAAAAGGCTTTTGACAAAATTCAACAGCCCTTCATGCTAAAAACGCTCAATAAATTCGGTATTGATGGAACGTACCTCAAAATAATAAGAGCTATTTATGACAAACCCACAGCCAATATCATACTGAATGGGCAAAAACTGGAAAAATTCCCTTTGAAAACTGGCACAAGACAGGGATGCCCTCTCTCACCACTCCTATTCAACATAGTGTTGGAAGTTCTGGCTAGGGCAATCAGGCAAGAGAAAGAAATCAAGGGTATTCAGTTAGGAAAAGAAGAAGTCAAATTGTCCCTGTTTGCAGATGACATGATTGTATATTTAGAAAACCCCATTGTCTCAGCCCAAAATCTCCTTAAGCTGATAAGCAACTTCAGCAAAGTCTCAGGATACAAAATTAATGTGCAAAAATCACAAGCATTCTTATACACCAGTAACAGACAAACAGAGAGCCAAATCAGGAATGAACTTCCATTCACAGTTGCTTCAAAGAGAATCAAATACCTAGGAATCCAACTTACAAGGGATGTAAAGGACCTCTTCAAGGAGA

>L1RS2SOM_PCR_4525F

ACTTCCATTCACAGTTGCTTCAAAGAGAATCAAATACCTAGGAATCCAACTTACAAGGGAtGTAAAGGACCTCTTCAAGGAGAACTACAaACCACTGCTCAGTGAAATCAAAGAGGACACAAACAAATGGAAGAACATACCATGCTCATGGATAGGAAGAATCAATATTGTGAAAATGGCCATACTGCCCAAGGTAATTTATAGATTCAATGCCATCCCCATCAAGCTACCAATGAGTTTCTTCACAGAGTTGGAAAAAACTACTTTAAAGTTCATATGGAACCAAAAAAGAGCCCGCATCTCCAAGACAATCCTAAGTCAAAAGAACAAAGCTGGAGGCATCACGCTACCTGACTTCAAACTATACTACAAGGCTACAGTAACCAAAACAGCATGGTACTGGTACCAAAACAGAGATATAGACCAATGGAACAGAACAGAGTCCTCAGAAATAATACCACACATCTACAGCCATTTGATCTTTGACAAACCTGAGAGAAACAAGAAATGGGGAAAGGATTCCCTATTTAATAAATGGTGCTGGGAAAATTGGCTAGCCATAAGTAGAAAGCTGAAACTGGATCCTTTCCTTACTCCTTATACGAAAATTAATTCAAGATGGATTAGAGACTTAAATGTTAGACCTAATACCATAAAAATCCTAGAGGAA

>L1RS2SOM_PCR_4891F

ATCCTTTCCTTACTCCTTATACGAAAATTAATTCAAGATGGATTAGAGACTTAAATGTTAGACCTAATACCATAAAAATCCTAGAGGAAAACCTAGGTAGTACCATTCAGGACATAGGCATGGGCAAAGATTTCATGTCTAAAACACCAAAAGCAACGGCAGCAAAAGCCAAAATTGACAAATGGGATCTCATTAAACTAAAGAGCTTCTGCACAGCAAAAGACACTACCATCAGAGTGAACAGGCAACCTACAGAATGGGAGAAAATTTTTGCAATCTACTCATCTGACAAAGGGCTTATATCCAGAACCTACAAAGAACTCAAACAAATTTACAAGAAAAAAACAAACAACCCCATCAAAAAGTGGGCAAAGGACATGAACAGACATTTCTCAAAAGAAGACATTCATACAGCCAACAGACACATGAAAAAATGCTCATCATCACTGGCCATCAGAGAAATGCAAATCAAAACCACAATGAGATACCATCTCACACCAGTTAGAATGGCAATCATTAAAAAGTCCGGAAACAACAGGTGCTGGAGAGGATGTGGAGAAATAGGAACACTTTTACACTGTTGGTGGGATTGTAAACTAGTTCAACCATTATGGAAAACAGTATGGCGATTCCTCAAGGATCTAGAACTAGATGTACCATATGACCCAGCCATCCCATTACTGGGTATATACCCAAAGGATTATAAATTATGCTGCTATAAAGACACATGCACACGTATGT

>L1RS2SOM_PCR_5479F

GGGATTGTAAACTAGTTCAACCATTATGGAAAACAGTATGGCGATTCCTCAAGGATCTAGAACTAGATGTACCATATGACCCAGCCATCCCATTACTGGGTATATACCCAAAGGATTATAAATTATGCTGCTATAAAGACACATGCACACGTATGTTTATTGCAGCACTATTCACAATAGCAAAGACTTGGAATCAACCCAAATGTCCATCAGTGACAGATTGGATTAAGAAAATGTGGCACATATACACCATGGAATACTATGCAGCCATAAAAAAGGATGAGTTTGATTCCTTTGTAGGGACTTGGATGCAGCTGGAATCCATCATTCTTAGCAAACTATCACAAGAACAGAAAACCAAACACCGCATGTTCTCACTCATAGGTGGGAACTGAACAATGAGATCACTCGGACTCAGGAAGGGGAACATCACACACCGGGGCCTATCATGGGGAGGGGGGAGGGGGGAGGGATTGCATTGGGAGTTATACCTGATGTAAATGACGAGTTGATGGGTGCAGCACAGCAACATGGCACAAGTATACATATGTAACAAACCTGCACGTTATGCACATGTACCCTACAACTTAAAGTATAATAATAATAAATAAATT

>L1RS2SOM_PCR_5755F

GGATGAGTTTGATTCCTTTGTAGGGACTTGGATGCAGCTGGAATCCATCATTCTTAGCAAACTATCACAAGAACAGAAAACCAAACACCGCATGTTCTCACTCATAGGTGGGAACTGAACAATGAGATCACTCGGACTCAGGAAGGGGAACATCACACACCGGGGCCTATCATGGGGAGGGGGGAGGGGGGAGGGATTGCATTGGGAGTTATACCTGATGTAAATGACGAGTTGATGGGTGCAGCACAGCAACATGGCACAAGTATACATATGTAACAAACCTGCACGTTATGCACATGTACCCTACAACTTAAAGTATAATAATAATAAATAAATTAAAAAAAAAAAAAAAAAAAAAAAAAAAAAAAAAAAAAAAAAAAAAAAAAAAAAAAAAAAAAAAAAAAAAAAAAAAAAAAAA

>L1RS2SOM_PCR_6011F

CACAAGTATACATATGTAACAAACCTGCACGTTATGCACATGTACCCTACAACTTAAAGTATAATAATAATAAATAAATTAAaAAAAAAAAAAAAAAAAAAAAAAAAAAAAAAAAAAAAAAAAAAAAAAAAAAAAAAAAAAAAAAAAAAAAAAAAAAAAAAAAAAAAAAAAAAAAAAAAAAAAAAAAAAAAAAAAAAAAAAAAAAAAAAAAAAAAAAAAAAAAAAAAAAAAAAAAAAAAAAAAA

>L1RS2SOM_PCR_pGT1_M13R

AAAAAAAAAAAAAAAAAAAAAAAAAAAAAAAAAAAAAAAAAAAAAAAAAAAAAAAAAAAAAAAAAAAAAAAAAAAAAAAAAAAAAAAAAAAAAAAAAAAAAATATAGCCCATAATATATCTGAAAGCAAAGAAATTTATAATTAGCTAAAATCAGAGACCAAACCTAACG

>L1RS2SOM_PCR_pGT2_M13R

AAAAAAAAAAAAAAAAAAAAAAAAAAAAAAAAAAAAAAAAAAAAAAAAAAAAAAAAAAAAAAAAAAAAAAAAAAAAAAAAAAAAAAATATAGCCCATAATATATCTGAAAGCAAAGAAATTTATAATTAGCTAAAATCAGAGACCAAACCTAACG
