# Supplementary material for: Somatic retrotransposition in the developing rhesus macaque brain
Source: HighWire-hosted journal article supplement (doi:10.1101/gr.276451.121), 2022-06-21
Supplement: Supplemental_Table_S1.xlsx [file Supplemental_Table_S1.xlsx]

## Sheet: Illumina sequencing
Supplemental Table S1. Illumina and ONT sequencing statistics, RC-seq probe sequences, and neuron MDA quality control primers.
Individual	Age	Gender	Library_DNA_input	WGS			RC-seq
				Reads	Mapped	Fold Coverage	Reads	Mapped
ON22212	7	M	Neuron-#7	896938106	99.205	38.4564	95933122	99.7429
			Neuron-#10	883093864	99.1459	37.796	32675578	99.6796
			Neuron-#16	852387286	99.0692	38.9132	150032142	99.6951
			Neuron-#17	857936450	98.7955	38.2071	86765658	99.6977
			Neuron-#19	830674342	99.2281	38.2229	78927106	99.7171
			Neuron-#21	897537688	99.4792	41.3473	71647382	99.7462
			Neuron-#37	919435270	99.5226	42.9724	12439432	99.7302
			Bulk liver	939642726	99.7918	45.1422	-	-
ON22213	7	M	Neuron-#10	886568082	99.1508	38.1969	101737292	99.679
			Neuron-#14	895242328	99.1104	40.1899	93472256	99.6436
			Neuron-#15	821593020	99.5763	38.3129	137634472	99.6703
			Neuron-#23	887828536	99.4903	40.897	122994980	99.7184
			Neuron-#25	897295650	99.4983	41.5352	149023784	99.6735
			Neuron-#31	913835452	99.5326	43.0914	145697058	99.8017
			Neuron-#38	852186798	99.5246	40.1625	176461504	99.7978
			Neuron-#39	903788812	99.5803	42.7555	173841274	99.8087
			Neuron-#47	886919988	99.518	41.6337	52442588	99.758
			Neuron-#49	791799662	99.4816	37.3458	6680696	99.6321
			Neuron-#52	889042056	95.2973	39.3943	63408590	99.6247
			Neuron-#69	877733602	98.8883	40.5429	117783210	99.7008
			Neuron-#71	859306660	98.9838	39.409	105420112	99.5769
			Bulk liver	765531432	99.7934	36.7684	-	-

## Sheet: ONT sequencing
Individual	Age	Gender	Library_DNA_input	Flowcell_ID	Reads	Yield_Gbp	N50_Kbp
ON22213	7	M	Hippocampus	PAF13854	2846185	12.7	7.3
			Liver	PAF13854	2894131	15.9	8.3

## Sheet: RC-seq probes
Probe_sequence	Probe_ID	TE_subfamily	Probe_tm
GGCCGGGCGCGGTGGCTCAAGCCTGTAATCCCAGCACTTTGGGAGGCCGAGACGGGCGGATCACGAGGTCAGGA	Alu_YRa4:+:1	Alu_YRa4	89.49
GCCGGGCGCGGTGGCTCAAGCCTGTAATCCCAGCACTTTGGGAGGCCGAGACGGGCGGATCACGAGGTCAGGAGA	Alu_YRa4:+:2	Alu_YRa4	89.23
CCGGGCGCGGTGGCTCAAGCCTGTAATCCCAGCACTTTGGGAGGCCGAGACGGGCGGATCACGAGGTCAGGAGA	Alu_YRa4:+:3	Alu_YRa4	88.94
CGGGCGCGGTGGCTCAAGCCTGTAATCCCAGCACTTTGGGAGGCCGAGACGGGCGGATCACGAGGTCAGGAGATC	Alu_YRa4:+:4	Alu_YRa4	88.68
GGGCGCGGTGGCTCAAGCCTGTAATCCCAGCACTTTGGGAGGCCGAGACGGGCGGATCACGAGGTCAGGAGATCGA	Alu_YRa4:+:5	Alu_YRa4	88.44
GGCGCGGTGGCTCAAGCCTGTAATCCCAGCACTTTGGGAGGCCGAGACGGGCGGATCACGAGGTCAGGAGATCGAGA	Alu_YRa4:+:6	Alu_YRa4	88.2
GCGCGGTGGCTCAAGCCTGTAATCCCAGCACTTTGGGAGGCCGAGACGGGCGGATCACGAGGTCAGGAGATCGAGAC	Alu_YRa4:+:7	Alu_YRa4	88.2
CGCGGTGGCTCAAGCCTGTAATCCCAGCACTTTGGGAGGCCGAGACGGGCGGATCACGAGGTCAGGAGATCGAGAC	Alu_YRa4:+:8	Alu_YRa4	87.9
GCGGTGGCTCAAGCCTGTAATCCCAGCACTTTGGGAGGCCGAGACGGGCGGATCACGAGGTCAGGAGATCGAGACCA	Alu_YRa4:+:9	Alu_YRa4	87.66
CGGTGGCTCAAGCCTGTAATCCCAGCACTTTGGGAGGCCGAGACGGGCGGATCACGAGGTCAGGAGATCGAGACCA	Alu_YRa4:+:10	Alu_YRa4	87.36
GGTGGCTCAAGCCTGTAATCCCAGCACTTTGGGAGGCCGAGACGGGCGGATCACGAGGTCAGGAGATCGAGACCATC	Alu_YRa4:+:11	Alu_YRa4	87.13
GTGGCTCAAGCCTGTAATCCCAGCACTTTGGGAGGCCGAGACGGGCGGATCACGAGGTCAGGAGATCGAGACCATCC	Alu_YRa4:+:12	Alu_YRa4	87.13
TGGCTCAAGCCTGTAATCCCAGCACTTTGGGAGGCCGAGACGGGCGGATCACGAGGTCAGGAGATCGAGACCATCCTG	Alu_YRa4:+:13	Alu_YRa4	86.91
GGCTCAAGCCTGTAATCCCAGCACTTTGGGAGGCCGAGACGGGCGGATCACGAGGTCAGGAGATCGAGACCATCCTG	Alu_YRa4:+:14	Alu_YRa4	87.13
GCTCAAGCCTGTAATCCCAGCACTTTGGGAGGCCGAGACGGGCGGATCACGAGGTCAGGAGATCGAGACCATCCTGGC	Alu_YRa4:+:15	Alu_YRa4	87.44
CTCAAGCCTGTAATCCCAGCACTTTGGGAGGCCGAGACGGGCGGATCACGAGGTCAGGAGATCGAGACCATCCTGGC	Alu_YRa4:+:16	Alu_YRa4	87.13
TCAAGCCTGTAATCCCAGCACTTTGGGAGGCCGAGACGGGCGGATCACGAGGTCAGGAGATCGAGACCATCCTGGCTA	Alu_YRa4:+:17	Alu_YRa4	86.38
CAAGCCTGTAATCCCAGCACTTTGGGAGGCCGAGACGGGCGGATCACGAGGTCAGGAGATCGAGACCATCCTGGCTA	Alu_YRa4:+:18	Alu_YRa4	86.6
AAGCCTGTAATCCCAGCACTTTGGGAGGCCGAGACGGGCGGATCACGAGGTCAGGAGATCGAGACCATCCTGGCTA	Alu_YRa4:+:19	Alu_YRa4	86.28
AGCCTGTAATCCCAGCACTTTGGGAGGCCGAGACGGGCGGATCACGAGGTCAGGAGATCGAGACCATCCTGGCTAA	Alu_YRa4:+:20	Alu_YRa4	86.28
GCCTGTAATCCCAGCACTTTGGGAGGCCGAGACGGGCGGATCACGAGGTCAGGAGATCGAGACCATCCTGGCTAACA	Alu_YRa4:+:21	Alu_YRa4	86.6
CCTGTAATCCCAGCACTTTGGGAGGCCGAGACGGGCGGATCACGAGGTCAGGAGATCGAGACCATCCTGGCTAACA	Alu_YRa4:+:22	Alu_YRa4	86.28
CTGTAATCCCAGCACTTTGGGAGGCCGAGACGGGCGGATCACGAGGTCAGGAGATCGAGACCATCCTGGCTAACACA	Alu_YRa4:+:23	Alu_YRa4	86.07
TGTAATCCCAGCACTTTGGGAGGCCGAGACGGGCGGATCACGAGGTCAGGAGATCGAGACCATCCTGGCTAACACAA	Alu_YRa4:+:24	Alu_YRa4	85.53
GTAATCCCAGCACTTTGGGAGGCCGAGACGGGCGGATCACGAGGTCAGGAGATCGAGACCATCCTGGCTAACACAA	Alu_YRa4:+:25	Alu_YRa4	85.74
TAATCCCAGCACTTTGGGAGGCCGAGACGGGCGGATCACGAGGTCAGGAGATCGAGACCATCCTGGCTAACACAATGA	Alu_YRa4:+:26	Alu_YRa4	85.33
AATCCCAGCACTTTGGGAGGCCGAGACGGGCGGATCACGAGGTCAGGAGATCGAGACCATCCTGGCTAACACAATGA	Alu_YRa4:+:27	Alu_YRa4	85.53
ATCCCAGCACTTTGGGAGGCCGAGACGGGCGGATCACGAGGTCAGGAGATCGAGACCATCCTGGCTAACACAATGAA	Alu_YRa4:+:28	Alu_YRa4	85.53
TCCCAGCACTTTGGGAGGCCGAGACGGGCGGATCACGAGGTCAGGAGATCGAGACCATCCTGGCTAACACAATGAAA	Alu_YRa4:+:29	Alu_YRa4	85.53
CCCAGCACTTTGGGAGGCCGAGACGGGCGGATCACGAGGTCAGGAGATCGAGACCATCCTGGCTAACACAATGAAA	Alu_YRa4:+:30	Alu_YRa4	85.74
CCAGCACTTTGGGAGGCCGAGACGGGCGGATCACGAGGTCAGGAGATCGAGACCATCCTGGCTAACACAATGAAAC	Alu_YRa4:+:31	Alu_YRa4	85.74
CAGCACTTTGGGAGGCCGAGACGGGCGGATCACGAGGTCAGGAGATCGAGACCATCCTGGCTAACACAATGAAACC	Alu_YRa4:+:32	Alu_YRa4	85.74
AGCACTTTGGGAGGCCGAGACGGGCGGATCACGAGGTCAGGAGATCGAGACCATCCTGGCTAACACAATGAAACC	Alu_YRa4:+:33	Alu_YRa4	85.4
GCACTTTGGGAGGCCGAGACGGGCGGATCACGAGGTCAGGAGATCGAGACCATCCTGGCTAACACAATGAAACCC	Alu_YRa4:+:34	Alu_YRa4	85.95
CACTTTGGGAGGCCGAGACGGGCGGATCACGAGGTCAGGAGATCGAGACCATCCTGGCTAACACAATGAAACCC	Alu_YRa4:+:35	Alu_YRa4	85.61
ACTTTGGGAGGCCGAGACGGGCGGATCACGAGGTCAGGAGATCGAGACCATCCTGGCTAACACAATGAAACCC	Alu_YRa4:+:36	Alu_YRa4	85.27
CTTTGGGAGGCCGAGACGGGCGGATCACGAGGTCAGGAGATCGAGACCATCCTGGCTAACACAATGAAACCCC	Alu_YRa4:+:37	Alu_YRa4	85.83
TTTGGGAGGCCGAGACGGGCGGATCACGAGGTCAGGAGATCGAGACCATCCTGGCTAACACAATGAAACCCCG	Alu_YRa4:+:38	Alu_YRa4	85.83
TTGGGAGGCCGAGACGGGCGGATCACGAGGTCAGGAGATCGAGACCATCCTGGCTAACACAATGAAACCCCGTC	Alu_YRa4:+:39	Alu_YRa4	86.17
TGGGAGGCCGAGACGGGCGGATCACGAGGTCAGGAGATCGAGACCATCCTGGCTAACACAATGAAACCCCGTCTC	Alu_YRa4:+:40	Alu_YRa4	86.5
AATGGCGGGAACCCGGGAGGCGGAGCTTGCAGTGAGCCGAGATCGCGCCACTGCACTCCAGCCTGGGCGACAGAGCGAGA	Alu_YRa4:+:179	Alu_YRa4	90.07
ATGGCGGGAACCCGGGAGGCGGAGCTTGCAGTGAGCCGAGATCGCGCCACTGCACTCCAGCCTGGGCGACAGAGCGAGAC	Alu_YRa4:+:180	Alu_YRa4	90.58
TGGCGGGAACCCGGGAGGCGGAGCTTGCAGTGAGCCGAGATCGCGCCACTGCACTCCAGCCTGGGCGACAGAGCGAGACTC	Alu_YRa4:+:181	Alu_YRa4	90.84
GGCGGGAACCCGGGAGGCGGAGCTTGCAGTGAGCCGAGATCGCGCCACTGCACTCCAGCCTGGGCGACAGAGCGAGACTC	Alu_YRa4:+:182	Alu_YRa4	91.1
GCGGGAACCCGGGAGGCGGAGCTTGCAGTGAGCCGAGATCGCGCCACTGCACTCCAGCCTGGGCGACAGAGCGAGACTCC	Alu_YRa4:+:183	Alu_YRa4	91.1
CGGGAACCCGGGAGGCGGAGCTTGCAGTGAGCCGAGATCGCGCCACTGCACTCCAGCCTGGGCGACAGAGCGAGACTCC	Alu_YRa4:+:184	Alu_YRa4	90.85
GGGAACCCGGGAGGCGGAGCTTGCAGTGAGCCGAGATCGCGCCACTGCACTCCAGCCTGGGCGACAGAGCGAGACTCCGC	Alu_YRa4:+:185	Alu_YRa4	91.1
GGAACCCGGGAGGCGGAGCTTGCAGTGAGCCGAGATCGCGCCACTGCACTCCAGCCTGGGCGACAGAGCGAGACTCCGCC	Alu_YRa4:+:186	Alu_YRa4	91.1
GAACCCGGGAGGCGGAGCTTGCAGTGAGCCGAGATCGCGCCACTGCACTCCAGCCTGGGCGACAGAGCGAGACTCCGCCTC	Alu_YRa4:+:187	Alu_YRa4	90.84
AACCCGGGAGGCGGAGCTTGCAGTGAGCCGAGATCGCGCCACTGCACTCCAGCCTGGGCGACAGAGCGAGACTCCGCCTC	Alu_YRa4:+:188	Alu_YRa4	90.58
ACCCGGGAGGCGGAGCTTGCAGTGAGCCGAGATCGCGCCACTGCACTCCAGCCTGGGCGACAGAGCGAGACTCCGCCTC	Alu_YRa4:+:189	Alu_YRa4	90.85
CCCGGGAGGCGGAGCTTGCAGTGAGCCGAGATCGCGCCACTGCACTCCAGCCTGGGCGACAGAGCGAGACTCCGCCTC	Alu_YRa4:+:190	Alu_YRa4	91.12
CCGGGAGGCGGAGCTTGCAGTGAGCCGAGATCGCGCCACTGCACTCCAGCCTGGGCGACAGAGCGAGACTCCGCCTC	Alu_YRa4:+:191	Alu_YRa4	90.86
CGGGAGGCGGAGCTTGCAGTGAGCCGAGATCGCGCCACTGCACTCCAGCCTGGGCGACAGAGCGAGACTCCGCCTC	Alu_YRa4:+:192	Alu_YRa4	90.59
GGGAGGCGGAGCTTGCAGTGAGCCGAGATCGCGCCACTGCACTCCAGCCTGGGCGACAGAGCGAGACTCCGCCTC	Alu_YRa4:+:193	Alu_YRa4	90.32
GGAGGCGGAGCTTGCAGTGAGCCGAGATCGCGCCACTGCACTCCAGCCTGGGCGACAGAGCGAGACTCCGCCTC	Alu_YRa4:+:194	Alu_YRa4	90.05
GAGGCGGAGCTTGCAGTGAGCCGAGATCGCGCCACTGCACTCCAGCCTGGGCGACAGAGCGAGACTCCGCCTC	Alu_YRa4:+:195	Alu_YRa4	89.76
AGGCGGAGCTTGCAGTGAGCCGAGATCGCGCCACTGCACTCCAGCCTGGGCGACAGAGCGAGACTCCGCCTC	Alu_YRa4:+:196	Alu_YRa4	89.47
GGCGGAGCTTGCAGTGAGCCGAGATCGCGCCACTGCACTCCAGCCTGGGCGACAGAGCGAGACTCCGCCTC	Alu_YRa4:+:197	Alu_YRa4	89.74
GCGGAGCTTGCAGTGAGCCGAGATCGCGCCACTGCACTCCAGCCTGGGCGACAGAGCGAGACTCCGCCTC	Alu_YRa4:+:198	Alu_YRa4	89.44
CGGAGCTTGCAGTGAGCCGAGATCGCGCCACTGCACTCCAGCCTGGGCGACAGAGCGAGACTCCGCCTC	Alu_YRa4:+:199	Alu_YRa4	89.13
GGAGCTTGCAGTGAGCCGAGATCGCGCCACTGCACTCCAGCCTGGGCGACAGAGCGAGACTCCGCCTC	Alu_YRa4:+:200	Alu_YRa4	88.81
GAGCTTGCAGTGAGCCGAGATCGCGCCACTGCACTCCAGCCTGGGCGACAGAGCGAGACTCCGCCTC	Alu_YRa4:+:201	Alu_YRa4	88.48
AGCTTGCAGTGAGCCGAGATCGCGCCACTGCACTCCAGCCTGGGCGACAGAGCGAGACTCCGCCTC	Alu_YRa4:+:202	Alu_YRa4	88.14
GCTTGCAGTGAGCCGAGATCGCGCCACTGCACTCCAGCCTGGGCGACAGAGCGAGACTCCGCCTC	Alu_YRa4:+:203	Alu_YRa4	88.42
CTTGCAGTGAGCCGAGATCGCGCCACTGCACTCCAGCCTGGGCGACAGAGCGAGACTCCGCCTC	Alu_YRa4:+:204	Alu_YRa4	88.07
TTGCAGTGAGCCGAGATCGCGCCACTGCACTCCAGCCTGGGCGACAGAGCGAGACTCCGCCTC	Alu_YRa4:+:205	Alu_YRa4	87.71
TGCAGTGAGCCGAGATCGCGCCACTGCACTCCAGCCTGGGCGACAGAGCGAGACTCCGCCTC	Alu_YRa4:+:206	Alu_YRa4	87.99
GCAGTGAGCCGAGATCGCGCCACTGCACTCCAGCCTGGGCGACAGAGCGAGACTCCGCCTC	Alu_YRa4:+:207	Alu_YRa4	88.29
CAGTGAGCCGAGATCGCGCCACTGCACTCCAGCCTGGGCGACAGAGCGAGACTCCGCCTC	Alu_YRa4:+:208	Alu_YRa4	87.91
AGTGAGCCGAGATCGCGCCACTGCACTCCAGCCTGGGCGACAGAGCGAGACTCCGCCTC	Alu_YRa4:+:209	Alu_YRa4	87.52
GTGAGCCGAGATCGCGCCACTGCACTCCAGCCTGGGCGACAGAGCGAGACTCCGCCTC	Alu_YRa4:+:210	Alu_YRa4	87.83
TGAGCCGAGATCGCGCCACTGCACTCCAGCCTGGGCGACAGAGCGAGACTCCGCCTC	Alu_YRa4:+:211	Alu_YRa4	87.42
GAGCCGAGATCGCGCCACTGCACTCCAGCCTGGGCGACAGAGCGAGACTCCGCCTC	Alu_YRa4:+:212	Alu_YRa4	87.74
AGCCGAGATCGCGCCACTGCACTCCAGCCTGGGCGACAGAGCGAGACTCCGCCTC	Alu_YRa4:+:213	Alu_YRa4	87.32
GCCGAGATCGCGCCACTGCACTCCAGCCTGGGCGACAGAGCGAGACTCCGCCTC	Alu_YRa4:+:214	Alu_YRa4	87.64
CCGAGATCGCGCCACTGCACTCCAGCCTGGGCGACAGAGCGAGACTCCGCCTC	Alu_YRa4:+:215	Alu_YRa4	87.2
CGAGATCGCGCCACTGCACTCCAGCCTGGGCGACAGAGCGAGACTCCGCCTC	Alu_YRa4:+:216	Alu_YRa4	86.74
GAGATCGCGCCACTGCACTCCAGCCTGGGCGACAGAGCGAGACTCCGCCTC	Alu_YRa4:+:217	Alu_YRa4	86.27
AGATCGCGCCACTGCACTCCAGCCTGGGCGACAGAGCGAGACTCCGCCTC	Alu_YRa4:+:218	Alu_YRa4	85.78
GGCCGGGCGCGGTGGCTCACGCCTGTAATCCCAGCACTTTGGGAGGCCGAGGCGGGCGGATCACAAGGTCAGGA	Alu_YRb4:+:1	Alu_YRb4	90.05
GCCGGGCGCGGTGGCTCACGCCTGTAATCCCAGCACTTTGGGAGGCCGAGGCGGGCGGATCACAAGGTCAGGAGA	Alu_YRb4:+:2	Alu_YRb4	89.78
CCGGGCGCGGTGGCTCACGCCTGTAATCCCAGCACTTTGGGAGGCCGAGGCGGGCGGATCACAAGGTCAGGAGA	Alu_YRb4:+:3	Alu_YRb4	89.49
CGGGCGCGGTGGCTCACGCCTGTAATCCCAGCACTTTGGGAGGCCGAGGCGGGCGGATCACAAGGTCAGGAGATC	Alu_YRb4:+:4	Alu_YRb4	89.23
GGGCGCGGTGGCTCACGCCTGTAATCCCAGCACTTTGGGAGGCCGAGGCGGGCGGATCACAAGGTCAGGAGATCGA	Alu_YRb4:+:5	Alu_YRb4	88.98
GGCGCGGTGGCTCACGCCTGTAATCCCAGCACTTTGGGAGGCCGAGGCGGGCGGATCACAAGGTCAGGAGATCGAGA	Alu_YRb4:+:6	Alu_YRb4	88.73
GCGCGGTGGCTCACGCCTGTAATCCCAGCACTTTGGGAGGCCGAGGCGGGCGGATCACAAGGTCAGGAGATCGAGAC	Alu_YRb4:+:7	Alu_YRb4	88.73
CGCGGTGGCTCACGCCTGTAATCCCAGCACTTTGGGAGGCCGAGGCGGGCGGATCACAAGGTCAGGAGATCGAGAC	Alu_YRb4:+:8	Alu_YRb4	88.44
GCGGTGGCTCACGCCTGTAATCCCAGCACTTTGGGAGGCCGAGGCGGGCGGATCACAAGGTCAGGAGATCGAGACCA	Alu_YRb4:+:9	Alu_YRb4	88.2
CGGTGGCTCACGCCTGTAATCCCAGCACTTTGGGAGGCCGAGGCGGGCGGATCACAAGGTCAGGAGATCGAGACCA	Alu_YRb4:+:10	Alu_YRb4	87.9
GGTGGCTCACGCCTGTAATCCCAGCACTTTGGGAGGCCGAGGCGGGCGGATCACAAGGTCAGGAGATCGAGACCAC	Alu_YRb4:+:11	Alu_YRb4	87.9
GTGGCTCACGCCTGTAATCCCAGCACTTTGGGAGGCCGAGGCGGGCGGATCACAAGGTCAGGAGATCGAGACCACG	Alu_YRb4:+:12	Alu_YRb4	87.9
TGGCTCACGCCTGTAATCCCAGCACTTTGGGAGGCCGAGGCGGGCGGATCACAAGGTCAGGAGATCGAGACCACGG	Alu_YRb4:+:13	Alu_YRb4	87.9
GGCTCACGCCTGTAATCCCAGCACTTTGGGAGGCCGAGGCGGGCGGATCACAAGGTCAGGAGATCGAGACCACGG	Alu_YRb4:+:14	Alu_YRb4	88.14
GCTCACGCCTGTAATCCCAGCACTTTGGGAGGCCGAGGCGGGCGGATCACAAGGTCAGGAGATCGAGACCACGGTGA	Alu_YRb4:+:15	Alu_YRb4	87.66
CTCACGCCTGTAATCCCAGCACTTTGGGAGGCCGAGGCGGGCGGATCACAAGGTCAGGAGATCGAGACCACGGTGA	Alu_YRb4:+:16	Alu_YRb4	87.36
TCACGCCTGTAATCCCAGCACTTTGGGAGGCCGAGGCGGGCGGATCACAAGGTCAGGAGATCGAGACCACGGTGAA	Alu_YRb4:+:17	Alu_YRb4	86.82
CACGCCTGTAATCCCAGCACTTTGGGAGGCCGAGGCGGGCGGATCACAAGGTCAGGAGATCGAGACCACGGTGAA	Alu_YRb4:+:18	Alu_YRb4	87.04
ACGCCTGTAATCCCAGCACTTTGGGAGGCCGAGGCGGGCGGATCACAAGGTCAGGAGATCGAGACCACGGTGAA	Alu_YRb4:+:19	Alu_YRb4	86.72
CGCCTGTAATCCCAGCACTTTGGGAGGCCGAGGCGGGCGGATCACAAGGTCAGGAGATCGAGACCACGGTGAAA	Alu_YRb4:+:20	Alu_YRb4	86.72
GCCTGTAATCCCAGCACTTTGGGAGGCCGAGGCGGGCGGATCACAAGGTCAGGAGATCGAGACCACGGTGAAAC	Alu_YRb4:+:21	Alu_YRb4	86.72
CCTGTAATCCCAGCACTTTGGGAGGCCGAGGCGGGCGGATCACAAGGTCAGGAGATCGAGACCACGGTGAAAC	Alu_YRb4:+:22	Alu_YRb4	86.39
CTGTAATCCCAGCACTTTGGGAGGCCGAGGCGGGCGGATCACAAGGTCAGGAGATCGAGACCACGGTGAAACC	Alu_YRb4:+:23	Alu_YRb4	86.39
TGTAATCCCAGCACTTTGGGAGGCCGAGGCGGGCGGATCACAAGGTCAGGAGATCGAGACCACGGTGAAACCC	Alu_YRb4:+:24	Alu_YRb4	86.39
GTAATCCCAGCACTTTGGGAGGCCGAGGCGGGCGGATCACAAGGTCAGGAGATCGAGACCACGGTGAAACCC	Alu_YRb4:+:25	Alu_YRb4	86.62
TAATCCCAGCACTTTGGGAGGCCGAGGCGGGCGGATCACAAGGTCAGGAGATCGAGACCACGGTGAAACCCC	Alu_YRb4:+:26	Alu_YRb4	86.62
AATCCCAGCACTTTGGGAGGCCGAGGCGGGCGGATCACAAGGTCAGGAGATCGAGACCACGGTGAAACCCC	Alu_YRb4:+:27	Alu_YRb4	86.85
ATCCCAGCACTTTGGGAGGCCGAGGCGGGCGGATCACAAGGTCAGGAGATCGAGACCACGGTGAAACCCCG	Alu_YRb4:+:28	Alu_YRb4	87.43
TCCCAGCACTTTGGGAGGCCGAGGCGGGCGGATCACAAGGTCAGGAGATCGAGACCACGGTGAAACCCCGTC	Alu_YRb4:+:29	Alu_YRb4	87.76
CCCAGCACTTTGGGAGGCCGAGGCGGGCGGATCACAAGGTCAGGAGATCGAGACCACGGTGAAACCCCGTC	Alu_YRb4:+:30	Alu_YRb4	88.01
CCAGCACTTTGGGAGGCCGAGGCGGGCGGATCACAAGGTCAGGAGATCGAGACCACGGTGAAACCCCGTCTC	Alu_YRb4:+:31	Alu_YRb4	87.76
CAGCACTTTGGGAGGCCGAGGCGGGCGGATCACAAGGTCAGGAGATCGAGACCACGGTGAAACCCCGTCTCTA	Alu_YRb4:+:32	Alu_YRb4	86.95
AGCACTTTGGGAGGCCGAGGCGGGCGGATCACAAGGTCAGGAGATCGAGACCACGGTGAAACCCCGTCTCTA	Alu_YRb4:+:33	Alu_YRb4	86.62
GCACTTTGGGAGGCCGAGGCGGGCGGATCACAAGGTCAGGAGATCGAGACCACGGTGAAACCCCGTCTCTAC	Alu_YRb4:+:34	Alu_YRb4	87.19
CACTTTGGGAGGCCGAGGCGGGCGGATCACAAGGTCAGGAGATCGAGACCACGGTGAAACCCCGTCTCTAC	Alu_YRb4:+:35	Alu_YRb4	86.85
ACTTTGGGAGGCCGAGGCGGGCGGATCACAAGGTCAGGAGATCGAGACCACGGTGAAACCCCGTCTCTAC	Alu_YRb4:+:36	Alu_YRb4	86.51
CTTTGGGAGGCCGAGGCGGGCGGATCACAAGGTCAGGAGATCGAGACCACGGTGAAACCCCGTCTCTACT	Alu_YRb4:+:37	Alu_YRb4	86.51
TTTGGGAGGCCGAGGCGGGCGGATCACAAGGTCAGGAGATCGAGACCACGGTGAAACCCCGTCTCTACTT	Alu_YRb4:+:38	Alu_YRb4	85.93
TTGGGAGGCCGAGGCGGGCGGATCACAAGGTCAGGAGATCGAGACCACGGTGAAACCCCGTCTCTACTTTA	Alu_YRb4:+:39	Alu_YRb4	85.7
TGGGAGGCCGAGGCGGGCGGATCACAAGGTCAGGAGATCGAGACCACGGTGAAACCCCGTCTCTACTTTAGC	Alu_YRb4:+:40	Alu_YRb4	86.62
AATGGCGTGAACCCGGGAGGCGGAGCTTGCAGTGAGCCGAGATCGCGCCACTGCACTCCAGCCTGGGCGACAGAGCGAGAC	Alu_YRb4:+:167	Alu_YRb4	89.82
ATGGCGTGAACCCGGGAGGCGGAGCTTGCAGTGAGCCGAGATCGCGCCACTGCACTCCAGCCTGGGCGACAGAGCGAGACTC	Alu_YRb4:+:168	Alu_YRb4	90.08
TGGCGTGAACCCGGGAGGCGGAGCTTGCAGTGAGCCGAGATCGCGCCACTGCACTCCAGCCTGGGCGACAGAGCGAGACTCC	Alu_YRb4:+:169	Alu_YRb4	90.58
GGCGTGAACCCGGGAGGCGGAGCTTGCAGTGAGCCGAGATCGCGCCACTGCACTCCAGCCTGGGCGACAGAGCGAGACTCC	Alu_YRb4:+:170	Alu_YRb4	90.84
GCGTGAACCCGGGAGGCGGAGCTTGCAGTGAGCCGAGATCGCGCCACTGCACTCCAGCCTGGGCGACAGAGCGAGACTCCG	Alu_YRb4:+:171	Alu_YRb4	90.84
CGTGAACCCGGGAGGCGGAGCTTGCAGTGAGCCGAGATCGCGCCACTGCACTCCAGCCTGGGCGACAGAGCGAGACTCCG	Alu_YRb4:+:172	Alu_YRb4	90.58
GTGAACCCGGGAGGCGGAGCTTGCAGTGAGCCGAGATCGCGCCACTGCACTCCAGCCTGGGCGACAGAGCGAGACTCCGTC	Alu_YRb4:+:173	Alu_YRb4	90.33
TGAACCCGGGAGGCGGAGCTTGCAGTGAGCCGAGATCGCGCCACTGCACTCCAGCCTGGGCGACAGAGCGAGACTCCGTCTC	Alu_YRb4:+:174	Alu_YRb4	90.08
GAACCCGGGAGGCGGAGCTTGCAGTGAGCCGAGATCGCGCCACTGCACTCCAGCCTGGGCGACAGAGCGAGACTCCGTCTC	Alu_YRb4:+:175	Alu_YRb4	90.33
AACCCGGGAGGCGGAGCTTGCAGTGAGCCGAGATCGCGCCACTGCACTCCAGCCTGGGCGACAGAGCGAGACTCCGTCTC	Alu_YRb4:+:176	Alu_YRb4	90.07
ACCCGGGAGGCGGAGCTTGCAGTGAGCCGAGATCGCGCCACTGCACTCCAGCCTGGGCGACAGAGCGAGACTCCGTCTC	Alu_YRb4:+:177	Alu_YRb4	90.33
CCCGGGAGGCGGAGCTTGCAGTGAGCCGAGATCGCGCCACTGCACTCCAGCCTGGGCGACAGAGCGAGACTCCGTCTC	Alu_YRb4:+:178	Alu_YRb4	90.59
CCGGGAGGCGGAGCTTGCAGTGAGCCGAGATCGCGCCACTGCACTCCAGCCTGGGCGACAGAGCGAGACTCCGTCTC	Alu_YRb4:+:179	Alu_YRb4	90.33
CGGGAGGCGGAGCTTGCAGTGAGCCGAGATCGCGCCACTGCACTCCAGCCTGGGCGACAGAGCGAGACTCCGTCTC	Alu_YRb4:+:180	Alu_YRb4	90.05
GGGAGGCGGAGCTTGCAGTGAGCCGAGATCGCGCCACTGCACTCCAGCCTGGGCGACAGAGCGAGACTCCGTCTC	Alu_YRb4:+:181	Alu_YRb4	89.78
GGAGGCGGAGCTTGCAGTGAGCCGAGATCGCGCCACTGCACTCCAGCCTGGGCGACAGAGCGAGACTCCGTCTC	Alu_YRb4:+:182	Alu_YRb4	89.49
GAGGCGGAGCTTGCAGTGAGCCGAGATCGCGCCACTGCACTCCAGCCTGGGCGACAGAGCGAGACTCCGTCTC	Alu_YRb4:+:183	Alu_YRb4	89.2
AGGCGGAGCTTGCAGTGAGCCGAGATCGCGCCACTGCACTCCAGCCTGGGCGACAGAGCGAGACTCCGTCTC	Alu_YRb4:+:184	Alu_YRb4	88.9
GGCGGAGCTTGCAGTGAGCCGAGATCGCGCCACTGCACTCCAGCCTGGGCGACAGAGCGAGACTCCGTCTC	Alu_YRb4:+:185	Alu_YRb4	89.16
GCGGAGCTTGCAGTGAGCCGAGATCGCGCCACTGCACTCCAGCCTGGGCGACAGAGCGAGACTCCGTCTC	Alu_YRb4:+:186	Alu_YRb4	88.85
CGGAGCTTGCAGTGAGCCGAGATCGCGCCACTGCACTCCAGCCTGGGCGACAGAGCGAGACTCCGTCTC	Alu_YRb4:+:187	Alu_YRb4	88.53
GGAGCTTGCAGTGAGCCGAGATCGCGCCACTGCACTCCAGCCTGGGCGACAGAGCGAGACTCCGTCTC	Alu_YRb4:+:188	Alu_YRb4	88.21
GAGCTTGCAGTGAGCCGAGATCGCGCCACTGCACTCCAGCCTGGGCGACAGAGCGAGACTCCGTCTC	Alu_YRb4:+:189	Alu_YRb4	87.87
AGCTTGCAGTGAGCCGAGATCGCGCCACTGCACTCCAGCCTGGGCGACAGAGCGAGACTCCGTCTC	Alu_YRb4:+:190	Alu_YRb4	87.52
GCTTGCAGTGAGCCGAGATCGCGCCACTGCACTCCAGCCTGGGCGACAGAGCGAGACTCCGTCTC	Alu_YRb4:+:191	Alu_YRb4	87.79
CTTGCAGTGAGCCGAGATCGCGCCACTGCACTCCAGCCTGGGCGACAGAGCGAGACTCCGTCTC	Alu_YRb4:+:192	Alu_YRb4	87.43
TTGCAGTGAGCCGAGATCGCGCCACTGCACTCCAGCCTGGGCGACAGAGCGAGACTCCGTCTC	Alu_YRb4:+:193	Alu_YRb4	87.06
TGCAGTGAGCCGAGATCGCGCCACTGCACTCCAGCCTGGGCGACAGAGCGAGACTCCGTCTC	Alu_YRb4:+:194	Alu_YRb4	87.33
GCAGTGAGCCGAGATCGCGCCACTGCACTCCAGCCTGGGCGACAGAGCGAGACTCCGTCTC	Alu_YRb4:+:195	Alu_YRb4	87.62
CAGTGAGCCGAGATCGCGCCACTGCACTCCAGCCTGGGCGACAGAGCGAGACTCCGTCTC	Alu_YRb4:+:196	Alu_YRb4	87.23
AGTGAGCCGAGATCGCGCCACTGCACTCCAGCCTGGGCGACAGAGCGAGACTCCGTCTC	Alu_YRb4:+:197	Alu_YRb4	86.83
GTGAGCCGAGATCGCGCCACTGCACTCCAGCCTGGGCGACAGAGCGAGACTCCGTCTC	Alu_YRb4:+:198	Alu_YRb4	87.12
TGAGCCGAGATCGCGCCACTGCACTCCAGCCTGGGCGACAGAGCGAGACTCCGTCTC	Alu_YRb4:+:199	Alu_YRb4	86.7
GAGCCGAGATCGCGCCACTGCACTCCAGCCTGGGCGACAGAGCGAGACTCCGTCTC	Alu_YRb4:+:200	Alu_YRb4	87
AGCCGAGATCGCGCCACTGCACTCCAGCCTGGGCGACAGAGCGAGACTCCGTCTC	Alu_YRb4:+:201	Alu_YRb4	86.57
GCCGAGATCGCGCCACTGCACTCCAGCCTGGGCGACAGAGCGAGACTCCGTCTC	Alu_YRb4:+:202	Alu_YRb4	86.88
CCGAGATCGCGCCACTGCACTCCAGCCTGGGCGACAGAGCGAGACTCCGTCTC	Alu_YRb4:+:203	Alu_YRb4	86.43
CGAGATCGCGCCACTGCACTCCAGCCTGGGCGACAGAGCGAGACTCCGTCTC	Alu_YRb4:+:204	Alu_YRb4	85.95
GAGATCGCGCCACTGCACTCCAGCCTGGGCGACAGAGCGAGACTCCGTCTC	Alu_YRb4:+:205	Alu_YRb4	85.47
AGATCGCGCCACTGCACTCCAGCCTGGGCGACAGAGCGAGACTCCGTCTC	Alu_YRb4:+:206	Alu_YRb4	84.96
GGCCGGGCGCGGTGGCTCACGCCTGTAATCCCAGCACTTTGGGAGGCCGAGGCGGGCGGATCACAAGGTCAGGA	Alu_YRc2:+:1	Alu_YRc2	90.05
GCCGGGCGCGGTGGCTCACGCCTGTAATCCCAGCACTTTGGGAGGCCGAGGCGGGCGGATCACAAGGTCAGGAGA	Alu_YRc2:+:2	Alu_YRc2	89.78
CCGGGCGCGGTGGCTCACGCCTGTAATCCCAGCACTTTGGGAGGCCGAGGCGGGCGGATCACAAGGTCAGGAGA	Alu_YRc2:+:3	Alu_YRc2	89.49
CGGGCGCGGTGGCTCACGCCTGTAATCCCAGCACTTTGGGAGGCCGAGGCGGGCGGATCACAAGGTCAGGAGATC	Alu_YRc2:+:4	Alu_YRc2	89.23
GGGCGCGGTGGCTCACGCCTGTAATCCCAGCACTTTGGGAGGCCGAGGCGGGCGGATCACAAGGTCAGGAGATCGA	Alu_YRc2:+:5	Alu_YRc2	88.98
GGCGCGGTGGCTCACGCCTGTAATCCCAGCACTTTGGGAGGCCGAGGCGGGCGGATCACAAGGTCAGGAGATCGAGA	Alu_YRc2:+:6	Alu_YRc2	88.73
GCGCGGTGGCTCACGCCTGTAATCCCAGCACTTTGGGAGGCCGAGGCGGGCGGATCACAAGGTCAGGAGATCGAGAC	Alu_YRc2:+:7	Alu_YRc2	88.73
CGCGGTGGCTCACGCCTGTAATCCCAGCACTTTGGGAGGCCGAGGCGGGCGGATCACAAGGTCAGGAGATCGAGAC	Alu_YRc2:+:8	Alu_YRc2	88.44
GCGGTGGCTCACGCCTGTAATCCCAGCACTTTGGGAGGCCGAGGCGGGCGGATCACAAGGTCAGGAGATCGAGACCA	Alu_YRc2:+:9	Alu_YRc2	88.2
CGGTGGCTCACGCCTGTAATCCCAGCACTTTGGGAGGCCGAGGCGGGCGGATCACAAGGTCAGGAGATCGAGACCA	Alu_YRc2:+:10	Alu_YRc2	87.9
GGTGGCTCACGCCTGTAATCCCAGCACTTTGGGAGGCCGAGGCGGGCGGATCACAAGGTCAGGAGATCGAGACCATC	Alu_YRc2:+:11	Alu_YRc2	87.66
GTGGCTCACGCCTGTAATCCCAGCACTTTGGGAGGCCGAGGCGGGCGGATCACAAGGTCAGGAGATCGAGACCATCC	Alu_YRc2:+:12	Alu_YRc2	87.66
TGGCTCACGCCTGTAATCCCAGCACTTTGGGAGGCCGAGGCGGGCGGATCACAAGGTCAGGAGATCGAGACCATCCTG	Alu_YRc2:+:13	Alu_YRc2	87.44
GGCTCACGCCTGTAATCCCAGCACTTTGGGAGGCCGAGGCGGGCGGATCACAAGGTCAGGAGATCGAGACCATCCTG	Alu_YRc2:+:14	Alu_YRc2	87.66
GCTCACGCCTGTAATCCCAGCACTTTGGGAGGCCGAGGCGGGCGGATCACAAGGTCAGGAGATCGAGACCATCCTGGC	Alu_YRc2:+:15	Alu_YRc2	87.96
CTCACGCCTGTAATCCCAGCACTTTGGGAGGCCGAGGCGGGCGGATCACAAGGTCAGGAGATCGAGACCATCCTGGC	Alu_YRc2:+:16	Alu_YRc2	87.66
TCACGCCTGTAATCCCAGCACTTTGGGAGGCCGAGGCGGGCGGATCACAAGGTCAGGAGATCGAGACCATCCTGGCTA	Alu_YRc2:+:17	Alu_YRc2	86.91
CACGCCTGTAATCCCAGCACTTTGGGAGGCCGAGGCGGGCGGATCACAAGGTCAGGAGATCGAGACCATCCTGGCTA	Alu_YRc2:+:18	Alu_YRc2	87.13
ACGCCTGTAATCCCAGCACTTTGGGAGGCCGAGGCGGGCGGATCACAAGGTCAGGAGATCGAGACCATCCTGGCTA	Alu_YRc2:+:19	Alu_YRc2	86.82
CGCCTGTAATCCCAGCACTTTGGGAGGCCGAGGCGGGCGGATCACAAGGTCAGGAGATCGAGACCATCCTGGCTAA	Alu_YRc2:+:20	Alu_YRc2	86.82
GCCTGTAATCCCAGCACTTTGGGAGGCCGAGGCGGGCGGATCACAAGGTCAGGAGATCGAGACCATCCTGGCTAACA	Alu_YRc2:+:21	Alu_YRc2	86.6
CCTGTAATCCCAGCACTTTGGGAGGCCGAGGCGGGCGGATCACAAGGTCAGGAGATCGAGACCATCCTGGCTAACA	Alu_YRc2:+:22	Alu_YRc2	86.28
CTGTAATCCCAGCACTTTGGGAGGCCGAGGCGGGCGGATCACAAGGTCAGGAGATCGAGACCATCCTGGCTAACAC	Alu_YRc2:+:23	Alu_YRc2	86.28
TGTAATCCCAGCACTTTGGGAGGCCGAGGCGGGCGGATCACAAGGTCAGGAGATCGAGACCATCCTGGCTAACACTG	Alu_YRc2:+:24	Alu_YRc2	86.07
GTAATCCCAGCACTTTGGGAGGCCGAGGCGGGCGGATCACAAGGTCAGGAGATCGAGACCATCCTGGCTAACACTG	Alu_YRc2:+:25	Alu_YRc2	86.28
TAATCCCAGCACTTTGGGAGGCCGAGGCGGGCGGATCACAAGGTCAGGAGATCGAGACCATCCTGGCTAACACTGTGA	Alu_YRc2:+:26	Alu_YRc2	85.86
AATCCCAGCACTTTGGGAGGCCGAGGCGGGCGGATCACAAGGTCAGGAGATCGAGACCATCCTGGCTAACACTGTGA	Alu_YRc2:+:27	Alu_YRc2	86.07
ATCCCAGCACTTTGGGAGGCCGAGGCGGGCGGATCACAAGGTCAGGAGATCGAGACCATCCTGGCTAACACTGTGAA	Alu_YRc2:+:28	Alu_YRc2	86.07
TCCCAGCACTTTGGGAGGCCGAGGCGGGCGGATCACAAGGTCAGGAGATCGAGACCATCCTGGCTAACACTGTGAAA	Alu_YRc2:+:29	Alu_YRc2	86.07
CCCAGCACTTTGGGAGGCCGAGGCGGGCGGATCACAAGGTCAGGAGATCGAGACCATCCTGGCTAACACTGTGAAA	Alu_YRc2:+:30	Alu_YRc2	86.28
CCAGCACTTTGGGAGGCCGAGGCGGGCGGATCACAAGGTCAGGAGATCGAGACCATCCTGGCTAACACTGTGAAAC	Alu_YRc2:+:31	Alu_YRc2	86.28
CAGCACTTTGGGAGGCCGAGGCGGGCGGATCACAAGGTCAGGAGATCGAGACCATCCTGGCTAACACTGTGAAACC	Alu_YRc2:+:32	Alu_YRc2	86.28
AGCACTTTGGGAGGCCGAGGCGGGCGGATCACAAGGTCAGGAGATCGAGACCATCCTGGCTAACACTGTGAAACC	Alu_YRc2:+:33	Alu_YRc2	85.95
GCACTTTGGGAGGCCGAGGCGGGCGGATCACAAGGTCAGGAGATCGAGACCATCCTGGCTAACACTGTGAAACCC	Alu_YRc2:+:34	Alu_YRc2	86.5
CACTTTGGGAGGCCGAGGCGGGCGGATCACAAGGTCAGGAGATCGAGACCATCCTGGCTAACACTGTGAAACCC	Alu_YRc2:+:35	Alu_YRc2	86.17
ACTTTGGGAGGCCGAGGCGGGCGGATCACAAGGTCAGGAGATCGAGACCATCCTGGCTAACACTGTGAAACCC	Alu_YRc2:+:36	Alu_YRc2	85.83
CTTTGGGAGGCCGAGGCGGGCGGATCACAAGGTCAGGAGATCGAGACCATCCTGGCTAACACTGTGAAACCCC	Alu_YRc2:+:37	Alu_YRc2	86.39
TTTGGGAGGCCGAGGCGGGCGGATCACAAGGTCAGGAGATCGAGACCATCCTGGCTAACACTGTGAAACCCCG	Alu_YRc2:+:38	Alu_YRc2	86.39
TTGGGAGGCCGAGGCGGGCGGATCACAAGGTCAGGAGATCGAGACCATCCTGGCTAACACTGTGAAACCCCGTC	Alu_YRc2:+:39	Alu_YRc2	86.72
TGGGAGGCCGAGGCGGGCGGATCACAAGGTCAGGAGATCGAGACCATCCTGGCTAACACTGTGAAACCCCGTCTC	Alu_YRc2:+:40	Alu_YRc2	87.04
AATGGCGTGAACCCGGGAGGCGGAGCTTGCAGTGAGCCGAGATCGCGCCACTGCACTCCAGCCTGGGCGACTAAGCGAGA	Alu_YRc2:+:179	Alu_YRc2	89.05
ATGGCGTGAACCCGGGAGGCGGAGCTTGCAGTGAGCCGAGATCGCGCCACTGCACTCCAGCCTGGGCGACTAAGCGAGAC	Alu_YRc2:+:180	Alu_YRc2	89.56
TGGCGTGAACCCGGGAGGCGGAGCTTGCAGTGAGCCGAGATCGCGCCACTGCACTCCAGCCTGGGCGACTAAGCGAGACTC	Alu_YRc2:+:181	Alu_YRc2	89.82
GGCGTGAACCCGGGAGGCGGAGCTTGCAGTGAGCCGAGATCGCGCCACTGCACTCCAGCCTGGGCGACTAAGCGAGACTC	Alu_YRc2:+:182	Alu_YRc2	90.07
GCGTGAACCCGGGAGGCGGAGCTTGCAGTGAGCCGAGATCGCGCCACTGCACTCCAGCCTGGGCGACTAAGCGAGACTCTG	Alu_YRc2:+:183	Alu_YRc2	89.82
CGTGAACCCGGGAGGCGGAGCTTGCAGTGAGCCGAGATCGCGCCACTGCACTCCAGCCTGGGCGACTAAGCGAGACTCTG	Alu_YRc2:+:184	Alu_YRc2	89.56
GTGAACCCGGGAGGCGGAGCTTGCAGTGAGCCGAGATCGCGCCACTGCACTCCAGCCTGGGCGACTAAGCGAGACTCTGTC	Alu_YRc2:+:185	Alu_YRc2	89.32
TGAACCCGGGAGGCGGAGCTTGCAGTGAGCCGAGATCGCGCCACTGCACTCCAGCCTGGGCGACTAAGCGAGACTCTGTCTC	Alu_YRc2:+:186	Alu_YRc2	89.08
GAACCCGGGAGGCGGAGCTTGCAGTGAGCCGAGATCGCGCCACTGCACTCCAGCCTGGGCGACTAAGCGAGACTCTGTCTC	Alu_YRc2:+:187	Alu_YRc2	89.32
AACCCGGGAGGCGGAGCTTGCAGTGAGCCGAGATCGCGCCACTGCACTCCAGCCTGGGCGACTAAGCGAGACTCTGTCTC	Alu_YRc2:+:188	Alu_YRc2	89.05
ACCCGGGAGGCGGAGCTTGCAGTGAGCCGAGATCGCGCCACTGCACTCCAGCCTGGGCGACTAAGCGAGACTCTGTCTC	Alu_YRc2:+:189	Alu_YRc2	89.29
CCCGGGAGGCGGAGCTTGCAGTGAGCCGAGATCGCGCCACTGCACTCCAGCCTGGGCGACTAAGCGAGACTCTGTCTC	Alu_YRc2:+:190	Alu_YRc2	89.54
CCGGGAGGCGGAGCTTGCAGTGAGCCGAGATCGCGCCACTGCACTCCAGCCTGGGCGACTAAGCGAGACTCTGTCTC	Alu_YRc2:+:191	Alu_YRc2	89.26
CGGGAGGCGGAGCTTGCAGTGAGCCGAGATCGCGCCACTGCACTCCAGCCTGGGCGACTAAGCGAGACTCTGTCTC	Alu_YRc2:+:192	Alu_YRc2	88.98
GGGAGGCGGAGCTTGCAGTGAGCCGAGATCGCGCCACTGCACTCCAGCCTGGGCGACTAAGCGAGACTCTGTCTC	Alu_YRc2:+:193	Alu_YRc2	88.68
GGAGGCGGAGCTTGCAGTGAGCCGAGATCGCGCCACTGCACTCCAGCCTGGGCGACTAAGCGAGACTCTGTCTC	Alu_YRc2:+:194	Alu_YRc2	88.38
GAGGCGGAGCTTGCAGTGAGCCGAGATCGCGCCACTGCACTCCAGCCTGGGCGACTAAGCGAGACTCTGTCTC	Alu_YRc2:+:195	Alu_YRc2	88.08
AGGCGGAGCTTGCAGTGAGCCGAGATCGCGCCACTGCACTCCAGCCTGGGCGACTAAGCGAGACTCTGTCTC	Alu_YRc2:+:196	Alu_YRc2	87.76
GGCGGAGCTTGCAGTGAGCCGAGATCGCGCCACTGCACTCCAGCCTGGGCGACTAAGCGAGACTCTGTCTC	Alu_YRc2:+:197	Alu_YRc2	88.01
GCGGAGCTTGCAGTGAGCCGAGATCGCGCCACTGCACTCCAGCCTGGGCGACTAAGCGAGACTCTGTCTC	Alu_YRc2:+:198	Alu_YRc2	87.68
CGGAGCTTGCAGTGAGCCGAGATCGCGCCACTGCACTCCAGCCTGGGCGACTAAGCGAGACTCTGTCTC	Alu_YRc2:+:199	Alu_YRc2	87.35
GGAGCTTGCAGTGAGCCGAGATCGCGCCACTGCACTCCAGCCTGGGCGACTAAGCGAGACTCTGTCTC	Alu_YRc2:+:200	Alu_YRc2	87
GAGCTTGCAGTGAGCCGAGATCGCGCCACTGCACTCCAGCCTGGGCGACTAAGCGAGACTCTGTCTC	Alu_YRc2:+:201	Alu_YRc2	86.64
AGCTTGCAGTGAGCCGAGATCGCGCCACTGCACTCCAGCCTGGGCGACTAAGCGAGACTCTGTCTC	Alu_YRc2:+:202	Alu_YRc2	86.28
GCTTGCAGTGAGCCGAGATCGCGCCACTGCACTCCAGCCTGGGCGACTAAGCGAGACTCTGTCTC	Alu_YRc2:+:203	Alu_YRc2	86.53
CTTGCAGTGAGCCGAGATCGCGCCACTGCACTCCAGCCTGGGCGACTAAGCGAGACTCTGTCTC	Alu_YRc2:+:204	Alu_YRc2	86.15
TTGCAGTGAGCCGAGATCGCGCCACTGCACTCCAGCCTGGGCGACTAAGCGAGACTCTGTCTC	Alu_YRc2:+:205	Alu_YRc2	85.75
TGCAGTGAGCCGAGATCGCGCCACTGCACTCCAGCCTGGGCGACTAAGCGAGACTCTGTCTC	Alu_YRc2:+:206	Alu_YRc2	86.01
GCAGTGAGCCGAGATCGCGCCACTGCACTCCAGCCTGGGCGACTAAGCGAGACTCTGTCTC	Alu_YRc2:+:207	Alu_YRc2	86.27
CAGTGAGCCGAGATCGCGCCACTGCACTCCAGCCTGGGCGACTAAGCGAGACTCTGTCTC	Alu_YRc2:+:208	Alu_YRc2	85.86
AGTGAGCCGAGATCGCGCCACTGCACTCCAGCCTGGGCGACTAAGCGAGACTCTGTCTC	Alu_YRc2:+:209	Alu_YRc2	85.44
GTGAGCCGAGATCGCGCCACTGCACTCCAGCCTGGGCGACTAAGCGAGACTCTGTCTC	Alu_YRc2:+:210	Alu_YRc2	85.71
TGAGCCGAGATCGCGCCACTGCACTCCAGCCTGGGCGACTAAGCGAGACTCTGTCTC	Alu_YRc2:+:211	Alu_YRc2	85.27
GAGCCGAGATCGCGCCACTGCACTCCAGCCTGGGCGACTAAGCGAGACTCTGTCTC	Alu_YRc2:+:212	Alu_YRc2	85.54
AGCCGAGATCGCGCCACTGCACTCCAGCCTGGGCGACTAAGCGAGACTCTGTCTC	Alu_YRc2:+:213	Alu_YRc2	85.08
GCCGAGATCGCGCCACTGCACTCCAGCCTGGGCGACTAAGCGAGACTCTGTCTC	Alu_YRc2:+:214	Alu_YRc2	85.36
CCGAGATCGCGCCACTGCACTCCAGCCTGGGCGACTAAGCGAGACTCTGTCTC	Alu_YRc2:+:215	Alu_YRc2	84.88
CGAGATCGCGCCACTGCACTCCAGCCTGGGCGACTAAGCGAGACTCTGTCTC	Alu_YRc2:+:216	Alu_YRc2	84.38
GAGATCGCGCCACTGCACTCCAGCCTGGGCGACTAAGCGAGACTCTGTCTC	Alu_YRc2:+:217	Alu_YRc2	83.86
AGATCGCGCCACTGCACTCCAGCCTGGGCGACTAAGCGAGACTCTGTCTC	Alu_YRc2:+:218	Alu_YRc2	83.32
GGCCGGGCGCGGTGGCTCAAGCCTGTAATCCCAGCACTTTGGGAGGCCGAGGCGGGTGGATCACGAGGTCAGGA	Alu_YRd4:+:1	Alu_YRd4	89.49
GCCGGGCGCGGTGGCTCAAGCCTGTAATCCCAGCACTTTGGGAGGCCGAGGCGGGTGGATCACGAGGTCAGGAGA	Alu_YRd4:+:2	Alu_YRd4	89.23
CCGGGCGCGGTGGCTCAAGCCTGTAATCCCAGCACTTTGGGAGGCCGAGGCGGGTGGATCACGAGGTCAGGAGA	Alu_YRd4:+:3	Alu_YRd4	88.94
CGGGCGCGGTGGCTCAAGCCTGTAATCCCAGCACTTTGGGAGGCCGAGGCGGGTGGATCACGAGGTCAGGAGATC	Alu_YRd4:+:4	Alu_YRd4	88.68
GGGCGCGGTGGCTCAAGCCTGTAATCCCAGCACTTTGGGAGGCCGAGGCGGGTGGATCACGAGGTCAGGAGATCGA	Alu_YRd4:+:5	Alu_YRd4	88.44
GGCGCGGTGGCTCAAGCCTGTAATCCCAGCACTTTGGGAGGCCGAGGCGGGTGGATCACGAGGTCAGGAGATCGAGA	Alu_YRd4:+:6	Alu_YRd4	88.2
GCGCGGTGGCTCAAGCCTGTAATCCCAGCACTTTGGGAGGCCGAGGCGGGTGGATCACGAGGTCAGGAGATCGAGAC	Alu_YRd4:+:7	Alu_YRd4	88.2
CGCGGTGGCTCAAGCCTGTAATCCCAGCACTTTGGGAGGCCGAGGCGGGTGGATCACGAGGTCAGGAGATCGAGAC	Alu_YRd4:+:8	Alu_YRd4	87.9
GCGGTGGCTCAAGCCTGTAATCCCAGCACTTTGGGAGGCCGAGGCGGGTGGATCACGAGGTCAGGAGATCGAGACTA	Alu_YRd4:+:9	Alu_YRd4	87.13
CGGTGGCTCAAGCCTGTAATCCCAGCACTTTGGGAGGCCGAGGCGGGTGGATCACGAGGTCAGGAGATCGAGACTA	Alu_YRd4:+:10	Alu_YRd4	86.82
GGTGGCTCAAGCCTGTAATCCCAGCACTTTGGGAGGCCGAGGCGGGTGGATCACGAGGTCAGGAGATCGAGACTATC	Alu_YRd4:+:11	Alu_YRd4	86.6
GTGGCTCAAGCCTGTAATCCCAGCACTTTGGGAGGCCGAGGCGGGTGGATCACGAGGTCAGGAGATCGAGACTATCC	Alu_YRd4:+:12	Alu_YRd4	86.6
TGGCTCAAGCCTGTAATCCCAGCACTTTGGGAGGCCGAGGCGGGTGGATCACGAGGTCAGGAGATCGAGACTATCCTG	Alu_YRd4:+:13	Alu_YRd4	86.38
GGCTCAAGCCTGTAATCCCAGCACTTTGGGAGGCCGAGGCGGGTGGATCACGAGGTCAGGAGATCGAGACTATCCTG	Alu_YRd4:+:14	Alu_YRd4	86.6
GCTCAAGCCTGTAATCCCAGCACTTTGGGAGGCCGAGGCGGGTGGATCACGAGGTCAGGAGATCGAGACTATCCTGGC	Alu_YRd4:+:15	Alu_YRd4	86.91
CTCAAGCCTGTAATCCCAGCACTTTGGGAGGCCGAGGCGGGTGGATCACGAGGTCAGGAGATCGAGACTATCCTGGC	Alu_YRd4:+:16	Alu_YRd4	86.6
TCAAGCCTGTAATCCCAGCACTTTGGGAGGCCGAGGCGGGTGGATCACGAGGTCAGGAGATCGAGACTATCCTGGCTA	Alu_YRd4:+:17	Alu_YRd4	85.86
CAAGCCTGTAATCCCAGCACTTTGGGAGGCCGAGGCGGGTGGATCACGAGGTCAGGAGATCGAGACTATCCTGGCTA	Alu_YRd4:+:18	Alu_YRd4	86.07
AAGCCTGTAATCCCAGCACTTTGGGAGGCCGAGGCGGGTGGATCACGAGGTCAGGAGATCGAGACTATCCTGGCTA	Alu_YRd4:+:19	Alu_YRd4	85.74
AGCCTGTAATCCCAGCACTTTGGGAGGCCGAGGCGGGTGGATCACGAGGTCAGGAGATCGAGACTATCCTGGCTAA	Alu_YRd4:+:20	Alu_YRd4	85.74
GCCTGTAATCCCAGCACTTTGGGAGGCCGAGGCGGGTGGATCACGAGGTCAGGAGATCGAGACTATCCTGGCTAACA	Alu_YRd4:+:21	Alu_YRd4	86.07
CCTGTAATCCCAGCACTTTGGGAGGCCGAGGCGGGTGGATCACGAGGTCAGGAGATCGAGACTATCCTGGCTAACA	Alu_YRd4:+:22	Alu_YRd4	85.74
CTGTAATCCCAGCACTTTGGGAGGCCGAGGCGGGTGGATCACGAGGTCAGGAGATCGAGACTATCCTGGCTAACAC	Alu_YRd4:+:23	Alu_YRd4	85.74
TGTAATCCCAGCACTTTGGGAGGCCGAGGCGGGTGGATCACGAGGTCAGGAGATCGAGACTATCCTGGCTAACACG	Alu_YRd4:+:24	Alu_YRd4	85.74
GTAATCCCAGCACTTTGGGAGGCCGAGGCGGGTGGATCACGAGGTCAGGAGATCGAGACTATCCTGGCTAACACG	Alu_YRd4:+:25	Alu_YRd4	85.95
TAATCCCAGCACTTTGGGAGGCCGAGGCGGGTGGATCACGAGGTCAGGAGATCGAGACTATCCTGGCTAACACGG	Alu_YRd4:+:26	Alu_YRd4	85.95
AATCCCAGCACTTTGGGAGGCCGAGGCGGGTGGATCACGAGGTCAGGAGATCGAGACTATCCTGGCTAACACGG	Alu_YRd4:+:27	Alu_YRd4	86.17
ATCCCAGCACTTTGGGAGGCCGAGGCGGGTGGATCACGAGGTCAGGAGATCGAGACTATCCTGGCTAACACGGTGA	Alu_YRd4:+:28	Alu_YRd4	86.28
TCCCAGCACTTTGGGAGGCCGAGGCGGGTGGATCACGAGGTCAGGAGATCGAGACTATCCTGGCTAACACGGTGAA	Alu_YRd4:+:29	Alu_YRd4	86.28
CCCAGCACTTTGGGAGGCCGAGGCGGGTGGATCACGAGGTCAGGAGATCGAGACTATCCTGGCTAACACGGTGAA	Alu_YRd4:+:30	Alu_YRd4	86.5
CCAGCACTTTGGGAGGCCGAGGCGGGTGGATCACGAGGTCAGGAGATCGAGACTATCCTGGCTAACACGGTGAAA	Alu_YRd4:+:31	Alu_YRd4	85.95
CAGCACTTTGGGAGGCCGAGGCGGGTGGATCACGAGGTCAGGAGATCGAGACTATCCTGGCTAACACGGTGAAAC	Alu_YRd4:+:32	Alu_YRd4	85.95
AGCACTTTGGGAGGCCGAGGCGGGTGGATCACGAGGTCAGGAGATCGAGACTATCCTGGCTAACACGGTGAAAC	Alu_YRd4:+:33	Alu_YRd4	85.61
GCACTTTGGGAGGCCGAGGCGGGTGGATCACGAGGTCAGGAGATCGAGACTATCCTGGCTAACACGGTGAAACC	Alu_YRd4:+:34	Alu_YRd4	86.17
CACTTTGGGAGGCCGAGGCGGGTGGATCACGAGGTCAGGAGATCGAGACTATCCTGGCTAACACGGTGAAACC	Alu_YRd4:+:35	Alu_YRd4	85.83
ACTTTGGGAGGCCGAGGCGGGTGGATCACGAGGTCAGGAGATCGAGACTATCCTGGCTAACACGGTGAAACC	Alu_YRd4:+:36	Alu_YRd4	85.48
CTTTGGGAGGCCGAGGCGGGTGGATCACGAGGTCAGGAGATCGAGACTATCCTGGCTAACACGGTGAAACCC	Alu_YRd4:+:37	Alu_YRd4	86.05
TTTGGGAGGCCGAGGCGGGTGGATCACGAGGTCAGGAGATCGAGACTATCCTGGCTAACACGGTGAAACCCC	Alu_YRd4:+:38	Alu_YRd4	86.05
TTGGGAGGCCGAGGCGGGTGGATCACGAGGTCAGGAGATCGAGACTATCCTGGCTAACACGGTGAAACCCCG	Alu_YRd4:+:39	Alu_YRd4	86.62
TGGGAGGCCGAGGCGGGTGGATCACGAGGTCAGGAGATCGAGACTATCCTGGCTAACACGGTGAAACCCCGTC	Alu_YRd4:+:40	Alu_YRd4	86.95
AATGGCGTGAACCCAGGGGGCGGAGCTTGCAGTGAGCCGAGATCGCGCCACTGCACTCCAGCCTGGGAGACACAGCGAGAC	Alu_YRd4:+:179	Alu_YRd4	89.32
ATGGCGTGAACCCAGGGGGCGGAGCTTGCAGTGAGCCGAGATCGCGCCACTGCACTCCAGCCTGGGAGACACAGCGAGACTC	Alu_YRd4:+:180	Alu_YRd4	89.58
TGGCGTGAACCCAGGGGGCGGAGCTTGCAGTGAGCCGAGATCGCGCCACTGCACTCCAGCCTGGGAGACACAGCGAGACTCC	Alu_YRd4:+:181	Alu_YRd4	90.08
GGCGTGAACCCAGGGGGCGGAGCTTGCAGTGAGCCGAGATCGCGCCACTGCACTCCAGCCTGGGAGACACAGCGAGACTCC	Alu_YRd4:+:182	Alu_YRd4	90.33
GCGTGAACCCAGGGGGCGGAGCTTGCAGTGAGCCGAGATCGCGCCACTGCACTCCAGCCTGGGAGACACAGCGAGACTCCG	Alu_YRd4:+:183	Alu_YRd4	90.33
CGTGAACCCAGGGGGCGGAGCTTGCAGTGAGCCGAGATCGCGCCACTGCACTCCAGCCTGGGAGACACAGCGAGACTCCG	Alu_YRd4:+:184	Alu_YRd4	90.07
GTGAACCCAGGGGGCGGAGCTTGCAGTGAGCCGAGATCGCGCCACTGCACTCCAGCCTGGGAGACACAGCGAGACTCCGTC	Alu_YRd4:+:185	Alu_YRd4	89.82
TGAACCCAGGGGGCGGAGCTTGCAGTGAGCCGAGATCGCGCCACTGCACTCCAGCCTGGGAGACACAGCGAGACTCCGTCTC	Alu_YRd4:+:186	Alu_YRd4	89.58
GAACCCAGGGGGCGGAGCTTGCAGTGAGCCGAGATCGCGCCACTGCACTCCAGCCTGGGAGACACAGCGAGACTCCGTCTC	Alu_YRd4:+:187	Alu_YRd4	89.82
AACCCAGGGGGCGGAGCTTGCAGTGAGCCGAGATCGCGCCACTGCACTCCAGCCTGGGAGACACAGCGAGACTCCGTCTC	Alu_YRd4:+:188	Alu_YRd4	89.56
ACCCAGGGGGCGGAGCTTGCAGTGAGCCGAGATCGCGCCACTGCACTCCAGCCTGGGAGACACAGCGAGACTCCGTCTC	Alu_YRd4:+:189	Alu_YRd4	89.81
CCCAGGGGGCGGAGCTTGCAGTGAGCCGAGATCGCGCCACTGCACTCCAGCCTGGGAGACACAGCGAGACTCCGTCTC	Alu_YRd4:+:190	Alu_YRd4	90.06
CCAGGGGGCGGAGCTTGCAGTGAGCCGAGATCGCGCCACTGCACTCCAGCCTGGGAGACACAGCGAGACTCCGTCTC	Alu_YRd4:+:191	Alu_YRd4	89.79
CAGGGGGCGGAGCTTGCAGTGAGCCGAGATCGCGCCACTGCACTCCAGCCTGGGAGACACAGCGAGACTCCGTCTC	Alu_YRd4:+:192	Alu_YRd4	89.52
AGGGGGCGGAGCTTGCAGTGAGCCGAGATCGCGCCACTGCACTCCAGCCTGGGAGACACAGCGAGACTCCGTCTC	Alu_YRd4:+:193	Alu_YRd4	89.23
GGGGGCGGAGCTTGCAGTGAGCCGAGATCGCGCCACTGCACTCCAGCCTGGGAGACACAGCGAGACTCCGTCTC	Alu_YRd4:+:194	Alu_YRd4	89.49
GGGGCGGAGCTTGCAGTGAGCCGAGATCGCGCCACTGCACTCCAGCCTGGGAGACACAGCGAGACTCCGTCTC	Alu_YRd4:+:195	Alu_YRd4	89.2
GGGCGGAGCTTGCAGTGAGCCGAGATCGCGCCACTGCACTCCAGCCTGGGAGACACAGCGAGACTCCGTCTC	Alu_YRd4:+:196	Alu_YRd4	88.9
GGCGGAGCTTGCAGTGAGCCGAGATCGCGCCACTGCACTCCAGCCTGGGAGACACAGCGAGACTCCGTCTC	Alu_YRd4:+:197	Alu_YRd4	88.59
GCGGAGCTTGCAGTGAGCCGAGATCGCGCCACTGCACTCCAGCCTGGGAGACACAGCGAGACTCCGTCTC	Alu_YRd4:+:198	Alu_YRd4	88.27
CGGAGCTTGCAGTGAGCCGAGATCGCGCCACTGCACTCCAGCCTGGGAGACACAGCGAGACTCCGTCTC	Alu_YRd4:+:199	Alu_YRd4	87.94
GGAGCTTGCAGTGAGCCGAGATCGCGCCACTGCACTCCAGCCTGGGAGACACAGCGAGACTCCGTCTC	Alu_YRd4:+:200	Alu_YRd4	87.6
GAGCTTGCAGTGAGCCGAGATCGCGCCACTGCACTCCAGCCTGGGAGACACAGCGAGACTCCGTCTC	Alu_YRd4:+:201	Alu_YRd4	87.26
AGCTTGCAGTGAGCCGAGATCGCGCCACTGCACTCCAGCCTGGGAGACACAGCGAGACTCCGTCTC	Alu_YRd4:+:202	Alu_YRd4	86.9
GCTTGCAGTGAGCCGAGATCGCGCCACTGCACTCCAGCCTGGGAGACACAGCGAGACTCCGTCTC	Alu_YRd4:+:203	Alu_YRd4	87.16
CTTGCAGTGAGCCGAGATCGCGCCACTGCACTCCAGCCTGGGAGACACAGCGAGACTCCGTCTC	Alu_YRd4:+:204	Alu_YRd4	86.79
TTGCAGTGAGCCGAGATCGCGCCACTGCACTCCAGCCTGGGAGACACAGCGAGACTCCGTCTC	Alu_YRd4:+:205	Alu_YRd4	86.41
TGCAGTGAGCCGAGATCGCGCCACTGCACTCCAGCCTGGGAGACACAGCGAGACTCCGTCTC	Alu_YRd4:+:206	Alu_YRd4	86.67
GCAGTGAGCCGAGATCGCGCCACTGCACTCCAGCCTGGGAGACACAGCGAGACTCCGTCTC	Alu_YRd4:+:207	Alu_YRd4	86.95
CAGTGAGCCGAGATCGCGCCACTGCACTCCAGCCTGGGAGACACAGCGAGACTCCGTCTC	Alu_YRd4:+:208	Alu_YRd4	86.55
AGTGAGCCGAGATCGCGCCACTGCACTCCAGCCTGGGAGACACAGCGAGACTCCGTCTC	Alu_YRd4:+:209	Alu_YRd4	86.13
GTGAGCCGAGATCGCGCCACTGCACTCCAGCCTGGGAGACACAGCGAGACTCCGTCTC	Alu_YRd4:+:210	Alu_YRd4	86.41
TGAGCCGAGATCGCGCCACTGCACTCCAGCCTGGGAGACACAGCGAGACTCCGTCTC	Alu_YRd4:+:211	Alu_YRd4	85.98
GAGCCGAGATCGCGCCACTGCACTCCAGCCTGGGAGACACAGCGAGACTCCGTCTC	Alu_YRd4:+:212	Alu_YRd4	86.27
AGCCGAGATCGCGCCACTGCACTCCAGCCTGGGAGACACAGCGAGACTCCGTCTC	Alu_YRd4:+:213	Alu_YRd4	85.82
GCCGAGATCGCGCCACTGCACTCCAGCCTGGGAGACACAGCGAGACTCCGTCTC	Alu_YRd4:+:214	Alu_YRd4	86.12
CCGAGATCGCGCCACTGCACTCCAGCCTGGGAGACACAGCGAGACTCCGTCTC	Alu_YRd4:+:215	Alu_YRd4	85.65
CGAGATCGCGCCACTGCACTCCAGCCTGGGAGACACAGCGAGACTCCGTCTC	Alu_YRd4:+:216	Alu_YRd4	85.17
GAGATCGCGCCACTGCACTCCAGCCTGGGAGACACAGCGAGACTCCGTCTC	Alu_YRd4:+:217	Alu_YRd4	84.66
AGATCGCGCCACTGCACTCCAGCCTGGGAGACACAGCGAGACTCCGTCTC	Alu_YRd4:+:218	Alu_YRd4	84.14
GGGGGCGGAGCAAGATGGCCGAATAGGAACAGCTCCAGTCTCCAACTCCCAGCGCGAGCGACACAGAAGACCGGTGA	L1RS2:+:1	L1RS2	87.66
GGGGCGGAGCAAGATGGCCGAATAGGAACAGCTCCAGTCTCCAACTCCCAGCGCGAGCGACACAGAAGACCGGTGAT	L1RS2:+:2	L1RS2	87.13
GGGCGGAGCAAGATGGCCGAATAGGAACAGCTCCAGTCTCCAACTCCCAGCGCGAGCGACACAGAAGACCGGTGATT	L1RS2:+:3	L1RS2	86.6
GGCGGAGCAAGATGGCCGAATAGGAACAGCTCCAGTCTCCAACTCCCAGCGCGAGCGACACAGAAGACCGGTGATTTC	L1RS2:+:4	L1RS2	86.38
GCGGAGCAAGATGGCCGAATAGGAACAGCTCCAGTCTCCAACTCCCAGCGCGAGCGACACAGAAGACCGGTGATTTCTGCA	L1RS2:+:5	L1RS2	86.28
CGGAGCAAGATGGCCGAATAGGAACAGCTCCAGTCTCCAACTCCCAGCGCGAGCGACACAGAAGACCGGTGATTTCTGCA	L1RS2:+:6	L1RS2	85.97
GGAGCAAGATGGCCGAATAGGAACAGCTCCAGTCTCCAACTCCCAGCGCGAGCGACACAGAAGACCGGTGATTTCTGCAT	L1RS2:+:7	L1RS2	85.46
GAGCAAGATGGCCGAATAGGAACAGCTCCAGTCTCCAACTCCCAGCGCGAGCGACACAGAAGACCGGTGATTTCTGCATT	L1RS2:+:8	L1RS2	84.95
AGCAAGATGGCCGAATAGGAACAGCTCCAGTCTCCAACTCCCAGCGCGAGCGACACAGAAGACCGGTGATTTCTGCATT	L1RS2:+:9	L1RS2	84.62
GCAAGATGGCCGAATAGGAACAGCTCCAGTCTCCAACTCCCAGCGCGAGCGACACAGAAGACCGGTGATTTCTGCATTT	L1RS2:+:10	L1RS2	84.62
CAAGATGGCCGAATAGGAACAGCTCCAGTCTCCAACTCCCAGCGCGAGCGACACAGAAGACCGGTGATTTCTGCATTT	L1RS2:+:11	L1RS2	84.28
AAGATGGCCGAATAGGAACAGCTCCAGTCTCCAACTCCCAGCGCGAGCGACACAGAAGACCGGTGATTTCTGCATTT	L1RS2:+:12	L1RS2	83.94
AGATGGCCGAATAGGAACAGCTCCAGTCTCCAACTCCCAGCGCGAGCGACACAGAAGACCGGTGATTTCTGCATTTTCA	L1RS2:+:13	L1RS2	84.1
GATGGCCGAATAGGAACAGCTCCAGTCTCCAACTCCCAGCGCGAGCGACACAGAAGACCGGTGATTTCTGCATTTTCAA	L1RS2:+:14	L1RS2	84.1
ATGGCCGAATAGGAACAGCTCCAGTCTCCAACTCCCAGCGCGAGCGACACAGAAGACCGGTGATTTCTGCATTTTCAA	L1RS2:+:15	L1RS2	83.76
TGGCCGAATAGGAACAGCTCCAGTCTCCAACTCCCAGCGCGAGCGACACAGAAGACCGGTGATTTCTGCATTTTCAAC	L1RS2:+:16	L1RS2	84.28
GGCCGAATAGGAACAGCTCCAGTCTCCAACTCCCAGCGCGAGCGACACAGAAGACCGGTGATTTCTGCATTTTCAAC	L1RS2:+:17	L1RS2	84.47
GCCGAATAGGAACAGCTCCAGTCTCCAACTCCCAGCGCGAGCGACACAGAAGACCGGTGATTTCTGCATTTTCAACTGA	L1RS2:+:18	L1RS2	84.1
CCGAATAGGAACAGCTCCAGTCTCCAACTCCCAGCGCGAGCGACACAGAAGACCGGTGATTTCTGCATTTTCAACTGA	L1RS2:+:19	L1RS2	83.76
CGAATAGGAACAGCTCCAGTCTCCAACTCCCAGCGCGAGCGACACAGAAGACCGGTGATTTCTGCATTTTCAACTGAG	L1RS2:+:20	L1RS2	83.76
GAATAGGAACAGCTCCAGTCTCCAACTCCCAGCGCGAGCGACACAGAAGACCGGTGATTTCTGCATTTTCAACTGAGG	L1RS2:+:21	L1RS2	83.76
AATAGGAACAGCTCCAGTCTCCAACTCCCAGCGCGAGCGACACAGAAGACCGGTGATTTCTGCATTTTCAACTGAGG	L1RS2:+:22	L1RS2	83.4
ATAGGAACAGCTCCAGTCTCCAACTCCCAGCGCGAGCGACACAGAAGACCGGTGATTTCTGCATTTTCAACTGAGGTA	L1RS2:+:23	L1RS2	83.23
TAGGAACAGCTCCAGTCTCCAACTCCCAGCGCGAGCGACACAGAAGACCGGTGATTTCTGCATTTTCAACTGAGGTAC	L1RS2:+:24	L1RS2	83.76
AGGAACAGCTCCAGTCTCCAACTCCCAGCGCGAGCGACACAGAAGACCGGTGATTTCTGCATTTTCAACTGAGGTAC	L1RS2:+:25	L1RS2	83.94
GGAACAGCTCCAGTCTCCAACTCCCAGCGCGAGCGACACAGAAGACCGGTGATTTCTGCATTTTCAACTGAGGTACTG	L1RS2:+:26	L1RS2	84.28
GAACAGCTCCAGTCTCCAACTCCCAGCGCGAGCGACACAGAAGACCGGTGATTTCTGCATTTTCAACTGAGGTACTGG	L1RS2:+:27	L1RS2	84.28
AACAGCTCCAGTCTCCAACTCCCAGCGCGAGCGACACAGAAGACCGGTGATTTCTGCATTTTCAACTGAGGTACTGG	L1RS2:+:28	L1RS2	83.94
ACAGCTCCAGTCTCCAACTCCCAGCGCGAGCGACACAGAAGACCGGTGATTTCTGCATTTTCAACTGAGGTACTGGG	L1RS2:+:29	L1RS2	84.47
CAGCTCCAGTCTCCAACTCCCAGCGCGAGCGACACAGAAGACCGGTGATTTCTGCATTTTCAACTGAGGTACTGGGT	L1RS2:+:30	L1RS2	84.47
AGCTCCAGTCTCCAACTCCCAGCGCGAGCGACACAGAAGACCGGTGATTTCTGCATTTTCAACTGAGGTACTGGGT	L1RS2:+:31	L1RS2	84.12
GCTCCAGTCTCCAACTCCCAGCGCGAGCGACACAGAAGACCGGTGATTTCTGCATTTTCAACTGAGGTACTGGGTTCA	L1RS2:+:32	L1RS2	84.28
CTCCAGTCTCCAACTCCCAGCGCGAGCGACACAGAAGACCGGTGATTTCTGCATTTTCAACTGAGGTACTGGGTTCA	L1RS2:+:33	L1RS2	83.94
TCCAGTCTCCAACTCCCAGCGCGAGCGACACAGAAGACCGGTGATTTCTGCATTTTCAACTGAGGTACTGGGTTCATC	L1RS2:+:34	L1RS2	83.76
CCAGTCTCCAACTCCCAGCGCGAGCGACACAGAAGACCGGTGATTTCTGCATTTTCAACTGAGGTACTGGGTTCATC	L1RS2:+:35	L1RS2	83.94
CAGTCTCCAACTCCCAGCGCGAGCGACACAGAAGACCGGTGATTTCTGCATTTTCAACTGAGGTACTGGGTTCATCTCA	L1RS2:+:36	L1RS2	83.58
AGTCTCCAACTCCCAGCGCGAGCGACACAGAAGACCGGTGATTTCTGCATTTTCAACTGAGGTACTGGGTTCATCTCA	L1RS2:+:37	L1RS2	83.23
GTCTCCAACTCCCAGCGCGAGCGACACAGAAGACCGGTGATTTCTGCATTTTCAACTGAGGTACTGGGTTCATCTCAC	L1RS2:+:38	L1RS2	83.76
TCTCCAACTCCCAGCGCGAGCGACACAGAAGACCGGTGATTTCTGCATTTTCAACTGAGGTACTGGGTTCATCTCACTG	L1RS2:+:39	L1RS2	83.58
CTCCAACTCCCAGCGCGAGCGACACAGAAGACCGGTGATTTCTGCATTTTCAACTGAGGTACTGGGTTCATCTCACTG	L1RS2:+:40	L1RS2	83.76
CACCAACATGGCACAAGTATACATATGTAACAAACCTGCACGTTATGCACATGTACCCTACAACTTAAAGTATAATA	L1RS2:+:6056	L1RS2	77.01
ACCAACATGGCACAAGTATACATATGTAACAAACCTGCACGTTATGCACATGTACCCTACAACTTAAAGTATAATA	L1RS2:+:6057	L1RS2	76.57
CCAACATGGCACAAGTATACATATGTAACAAACCTGCACGTTATGCACATGTACCCTACAACTTAAAGTATAATAA	L1RS2:+:6058	L1RS2	76.57
CAACATGGCACAAGTATACATATGTAACAAACCTGCACGTTATGCACATGTACCCTACAACTTAAAGTATAATAATA	L1RS2:+:6059	L1RS2	75.95
AACATGGCACAAGTATACATATGTAACAAACCTGCACGTTATGCACATGTACCCTACAACTTAAAGTATAATAATA	L1RS2:+:6060	L1RS2	75.49
ACATGGCACAAGTATACATATGTAACAAACCTGCACGTTATGCACATGTACCCTACAACTTAAAGTATAATAATAA	L1RS2:+:6061	L1RS2	75.49
CATGGCACAAGTATACATATGTAACAAACCTGCACGTTATGCACATGTACCCTACAACTTAAAGTATAATAATAATA	L1RS2:+:6062	L1RS2	75.42
ATGGCACAAGTATACATATGTAACAAACCTGCACGTTATGCACATGTACCCTACAACTTAAAGTATAATAATAATA	L1RS2:+:6063	L1RS2	74.95
TGGCACAAGTATACATATGTAACAAACCTGCACGTTATGCACATGTACCCTACAACTTAAAGTATAATAATAATAA	L1RS2:+:6064	L1RS2	74.95
GGCACAAGTATACATATGTAACAAACCTGCACGTTATGCACATGTACCCTACAACTTAAAGTATAATAATAATAA	L1RS2:+:6065	L1RS2	75.02
GCACAAGTATACATATGTAACAAACCTGCACGTTATGCACATGTACCCTACAACTTAAAGTATAATAATAATAAA	L1RS2:+:6066	L1RS2	74.47
CACAAGTATACATATGTAACAAACCTGCACGTTATGCACATGTACCCTACAACTTAAAGTATAATAATAATAAA	L1RS2:+:6067	L1RS2	73.98
ACAAGTATACATATGTAACAAACCTGCACGTTATGCACATGTACCCTACAACTTAAAGTATAATAATAATAAA	L1RS2:+:6068	L1RS2	73.47
CAAGTATACATATGTAACAAACCTGCACGTTATGCACATGTACCCTACAACTTAAAGTATAATAATAATAAATA	L1RS2:+:6069	L1RS2	73.42
AAGTATACATATGTAACAAACCTGCACGTTATGCACATGTACCCTACAACTTAAAGTATAATAATAATAAATA	L1RS2:+:6070	L1RS2	72.91
AGTATACATATGTAACAAACCTGCACGTTATGCACATGTACCCTACAACTTAAAGTATAATAATAATAAATAA	L1RS2:+:6071	L1RS2	72.91
GTATACATATGTAACAAACCTGCACGTTATGCACATGTACCCTACAACTTAAAGTATAATAATAATAAATAAA	L1RS2:+:6072	L1RS2	72.91
TATACATATGTAACAAACCTGCACGTTATGCACATGTACCCTACAACTTAAAGTATAATAATAATAAATAAA	L1RS2:+:6073	L1RS2	72.38
ATACATATGTAACAAACCTGCACGTTATGCACATGTACCCTACAACTTAAAGTATAATAATAATAAATAAA	L1RS2:+:6074	L1RS2	72.42
TACATATGTAACAAACCTGCACGTTATGCACATGTACCCTACAACTTAAAGTATAATAATAATAAATAAA	L1RS2:+:6075	L1RS2	72.45
ACATATGTAACAAACCTGCACGTTATGCACATGTACCCTACAACTTAAAGTATAATAATAATAAATAAA	L1RS2:+:6076	L1RS2	72.49
CATATGTAACAAACCTGCACGTTATGCACATGTACCCTACAACTTAAAGTATAATAATAATAAATAAA	L1RS2:+:6077	L1RS2	72.53
ATATGTAACAAACCTGCACGTTATGCACATGTACCCTACAACTTAAAGTATAATAATAATAAATAAA	L1RS2:+:6078	L1RS2	71.96
TATGTAACAAACCTGCACGTTATGCACATGTACCCTACAACTTAAAGTATAATAATAATAAATAAA	L1RS2:+:6079	L1RS2	71.99
ATGTAACAAACCTGCACGTTATGCACATGTACCCTACAACTTAAAGTATAATAATAATAAATAAA	L1RS2:+:6080	L1RS2	72.02
TGTAACAAACCTGCACGTTATGCACATGTACCCTACAACTTAAAGTATAATAATAATAAATAAA	L1RS2:+:6081	L1RS2	72.05
GTAACAAACCTGCACGTTATGCACATGTACCCTACAACTTAAAGTATAATAATAATAAATAAA	L1RS2:+:6082	L1RS2	72.09
TAACAAACCTGCACGTTATGCACATGTACCCTACAACTTAAAGTATAATAATAATAAATAAA	L1RS2:+:6083	L1RS2	71.46
AACAAACCTGCACGTTATGCACATGTACCCTACAACTTAAAGTATAATAATAATAAATAAA	L1RS2:+:6084	L1RS2	71.49
ACAAACCTGCACGTTATGCACATGTACCCTACAACTTAAAGTATAATAATAATAAATAAA	L1RS2:+:6085	L1RS2	71.51
CAAACCTGCACGTTATGCACATGTACCCTACAACTTAAAGTATAATAATAATAAATAAA	L1RS2:+:6086	L1RS2	71.54
AAACCTGCACGTTATGCACATGTACCCTACAACTTAAAGTATAATAATAATAAATAAA	L1RS2:+:6087	L1RS2	70.86
AACCTGCACGTTATGCACATGTACCCTACAACTTAAAGTATAATAATAATAAATAAA	L1RS2:+:6088	L1RS2	70.88
ACCTGCACGTTATGCACATGTACCCTACAACTTAAAGTATAATAATAATAAATAAA	L1RS2:+:6089	L1RS2	70.9
CCTGCACGTTATGCACATGTACCCTACAACTTAAAGTATAATAATAATAAATAAA	L1RS2:+:6090	L1RS2	70.92
CTGCACGTTATGCACATGTACCCTACAACTTAAAGTATAATAATAATAAATAAA	L1RS2:+:6091	L1RS2	70.17
TGCACGTTATGCACATGTACCCTACAACTTAAAGTATAATAATAATAAATAAA	L1RS2:+:6092	L1RS2	69.41
GCACGTTATGCACATGTACCCTACAACTTAAAGTATAATAATAATAAATAAA	L1RS2:+:6093	L1RS2	69.4
CACGTTATGCACATGTACCCTACAACTTAAAGTATAATAATAATAAATAAA	L1RS2:+:6094	L1RS2	68.58
ACGTTATGCACATGTACCCTACAACTTAAAGTATAATAATAATAAATAAA	L1RS2:+:6095	L1RS2	67.74
GGGGGGAGGAGCCAAGATGGCCGAATAGGAACAGCTCCGGTCTACAGCTCCCAGCGTGAGCGACGCAGAAGACGG	L1RS37:+:1	L1RS37	88.14
GGGGGAGGAGCCAAGATGGCCGAATAGGAACAGCTCCGGTCTACAGCTCCCAGCGTGAGCGACGCAGAAGACGGG	L1RS37:+:2	L1RS37	88.14
GGGGAGGAGCCAAGATGGCCGAATAGGAACAGCTCCGGTCTACAGCTCCCAGCGTGAGCGACGCAGAAGACGGGTGA	L1RS37:+:3	L1RS37	87.66
GGGAGGAGCCAAGATGGCCGAATAGGAACAGCTCCGGTCTACAGCTCCCAGCGTGAGCGACGCAGAAGACGGGTGAT	L1RS37:+:4	L1RS37	87.13
GGAGGAGCCAAGATGGCCGAATAGGAACAGCTCCGGTCTACAGCTCCCAGCGTGAGCGACGCAGAAGACGGGTGATT	L1RS37:+:5	L1RS37	86.6
GAGGAGCCAAGATGGCCGAATAGGAACAGCTCCGGTCTACAGCTCCCAGCGTGAGCGACGCAGAAGACGGGTGATTTC	L1RS37:+:6	L1RS37	86.38
AGGAGCCAAGATGGCCGAATAGGAACAGCTCCGGTCTACAGCTCCCAGCGTGAGCGACGCAGAAGACGGGTGATTTC	L1RS37:+:7	L1RS37	86.07
GGAGCCAAGATGGCCGAATAGGAACAGCTCCGGTCTACAGCTCCCAGCGTGAGCGACGCAGAAGACGGGTGATTTCTGCA	L1RS37:+:8	L1RS37	86.48
GAGCCAAGATGGCCGAATAGGAACAGCTCCGGTCTACAGCTCCCAGCGTGAGCGACGCAGAAGACGGGTGATTTCTGCAT	L1RS37:+:9	L1RS37	85.97
AGCCAAGATGGCCGAATAGGAACAGCTCCGGTCTACAGCTCCCAGCGTGAGCGACGCAGAAGACGGGTGATTTCTGCAT	L1RS37:+:10	L1RS37	85.66
GCCAAGATGGCCGAATAGGAACAGCTCCGGTCTACAGCTCCCAGCGTGAGCGACGCAGAAGACGGGTGATTTCTGCATT	L1RS37:+:11	L1RS37	85.66
CCAAGATGGCCGAATAGGAACAGCTCCGGTCTACAGCTCCCAGCGTGAGCGACGCAGAAGACGGGTGATTTCTGCATT	L1RS37:+:12	L1RS37	85.33
CAAGATGGCCGAATAGGAACAGCTCCGGTCTACAGCTCCCAGCGTGAGCGACGCAGAAGACGGGTGATTTCTGCATTTC	L1RS37:+:13	L1RS37	85.14
AAGATGGCCGAATAGGAACAGCTCCGGTCTACAGCTCCCAGCGTGAGCGACGCAGAAGACGGGTGATTTCTGCATTTC	L1RS37:+:14	L1RS37	84.81
AGATGGCCGAATAGGAACAGCTCCGGTCTACAGCTCCCAGCGTGAGCGACGCAGAAGACGGGTGATTTCTGCATTTCCA	L1RS37:+:15	L1RS37	85.14
GATGGCCGAATAGGAACAGCTCCGGTCTACAGCTCCCAGCGTGAGCGACGCAGAAGACGGGTGATTTCTGCATTTCCAA	L1RS37:+:16	L1RS37	85.14
ATGGCCGAATAGGAACAGCTCCGGTCTACAGCTCCCAGCGTGAGCGACGCAGAAGACGGGTGATTTCTGCATTTCCAA	L1RS37:+:17	L1RS37	84.81
TGGCCGAATAGGAACAGCTCCGGTCTACAGCTCCCAGCGTGAGCGACGCAGAAGACGGGTGATTTCTGCATTTCCAAC	L1RS37:+:18	L1RS37	85.33
GGCCGAATAGGAACAGCTCCGGTCTACAGCTCCCAGCGTGAGCGACGCAGAAGACGGGTGATTTCTGCATTTCCAAC	L1RS37:+:19	L1RS37	85.53
GCCGAATAGGAACAGCTCCGGTCTACAGCTCCCAGCGTGAGCGACGCAGAAGACGGGTGATTTCTGCATTTCCAACTGA	L1RS37:+:20	L1RS37	85.14
CCGAATAGGAACAGCTCCGGTCTACAGCTCCCAGCGTGAGCGACGCAGAAGACGGGTGATTTCTGCATTTCCAACTGA	L1RS37:+:21	L1RS37	84.81
CGAATAGGAACAGCTCCGGTCTACAGCTCCCAGCGTGAGCGACGCAGAAGACGGGTGATTTCTGCATTTCCAACTGAG	L1RS37:+:22	L1RS37	84.81
GAATAGGAACAGCTCCGGTCTACAGCTCCCAGCGTGAGCGACGCAGAAGACGGGTGATTTCTGCATTTCCAACTGAGG	L1RS37:+:23	L1RS37	84.81
AATAGGAACAGCTCCGGTCTACAGCTCCCAGCGTGAGCGACGCAGAAGACGGGTGATTTCTGCATTTCCAACTGAGG	L1RS37:+:24	L1RS37	84.47
ATAGGAACAGCTCCGGTCTACAGCTCCCAGCGTGAGCGACGCAGAAGACGGGTGATTTCTGCATTTCCAACTGAGGTA	L1RS37:+:25	L1RS37	84.28
TAGGAACAGCTCCGGTCTACAGCTCCCAGCGTGAGCGACGCAGAAGACGGGTGATTTCTGCATTTCCAACTGAGGTAC	L1RS37:+:26	L1RS37	84.81
AGGAACAGCTCCGGTCTACAGCTCCCAGCGTGAGCGACGCAGAAGACGGGTGATTTCTGCATTTCCAACTGAGGTAC	L1RS37:+:27	L1RS37	85
GGAACAGCTCCGGTCTACAGCTCCCAGCGTGAGCGACGCAGAAGACGGGTGATTTCTGCATTTCCAACTGAGGTACC	L1RS37:+:28	L1RS37	85.53
GAACAGCTCCGGTCTACAGCTCCCAGCGTGAGCGACGCAGAAGACGGGTGATTTCTGCATTTCCAACTGAGGTACCG	L1RS37:+:29	L1RS37	85.53
AACAGCTCCGGTCTACAGCTCCCAGCGTGAGCGACGCAGAAGACGGGTGATTTCTGCATTTCCAACTGAGGTACCG	L1RS37:+:30	L1RS37	85.2
ACAGCTCCGGTCTACAGCTCCCAGCGTGAGCGACGCAGAAGACGGGTGATTTCTGCATTTCCAACTGAGGTACCGG	L1RS37:+:31	L1RS37	85.74
CAGCTCCGGTCTACAGCTCCCAGCGTGAGCGACGCAGAAGACGGGTGATTTCTGCATTTCCAACTGAGGTACCGGG	L1RS37:+:32	L1RS37	86.28
AGCTCCGGTCTACAGCTCCCAGCGTGAGCGACGCAGAAGACGGGTGATTTCTGCATTTCCAACTGAGGTACCGGG	L1RS37:+:33	L1RS37	85.95
GCTCCGGTCTACAGCTCCCAGCGTGAGCGACGCAGAAGACGGGTGATTTCTGCATTTCCAACTGAGGTACCGGGT	L1RS37:+:34	L1RS37	85.95
CTCCGGTCTACAGCTCCCAGCGTGAGCGACGCAGAAGACGGGTGATTTCTGCATTTCCAACTGAGGTACCGGGT	L1RS37:+:35	L1RS37	85.61
TCCGGTCTACAGCTCCCAGCGTGAGCGACGCAGAAGACGGGTGATTTCTGCATTTCCAACTGAGGTACCGGGTTCA	L1RS37:+:36	L1RS37	85.2
CCGGTCTACAGCTCCCAGCGTGAGCGACGCAGAAGACGGGTGATTTCTGCATTTCCAACTGAGGTACCGGGTTCA	L1RS37:+:37	L1RS37	85.4
CGGTCTACAGCTCCCAGCGTGAGCGACGCAGAAGACGGGTGATTTCTGCATTTCCAACTGAGGTACCGGGTTCATC	L1RS37:+:38	L1RS37	85.2
GGTCTACAGCTCCCAGCGTGAGCGACGCAGAAGACGGGTGATTTCTGCATTTCCAACTGAGGTACCGGGTTCATCTCA	L1RS37:+:39	L1RS37	84.81
GTCTACAGCTCCCAGCGTGAGCGACGCAGAAGACGGGTGATTTCTGCATTTCCAACTGAGGTACCGGGTTCATCTCAC	L1RS37:+:40	L1RS37	84.81
AATGGGTGCAGCACACCAACATGGCACATGTATACATATGTAACAAACCTGCACGTTGTGCACATGTACCCTAGAACTTAA	L1RS37:+:6054	L1RS37	80.21
ATGGGTGCAGCACACCAACATGGCACATGTATACATATGTAACAAACCTGCACGTTGTGCACATGTACCCTAGAACTTAAA	L1RS37:+:6055	L1RS37	80.21
TGGGTGCAGCACACCAACATGGCACATGTATACATATGTAACAAACCTGCACGTTGTGCACATGTACCCTAGAACTTAAAG	L1RS37:+:6056	L1RS37	80.71
GGGTGCAGCACACCAACATGGCACATGTATACATATGTAACAAACCTGCACGTTGTGCACATGTACCCTAGAACTTAAAG	L1RS37:+:6057	L1RS37	80.85
GGTGCAGCACACCAACATGGCACATGTATACATATGTAACAAACCTGCACGTTGTGCACATGTACCCTAGAACTTAAAGTA	L1RS37:+:6058	L1RS37	80.21
GTGCAGCACACCAACATGGCACATGTATACATATGTAACAAACCTGCACGTTGTGCACATGTACCCTAGAACTTAAAGTATA	L1RS37:+:6059	L1RS37	79.58
TGCAGCACACCAACATGGCACATGTATACATATGTAACAAACCTGCACGTTGTGCACATGTACCCTAGAACTTAAAGTATAA	L1RS37:+:6060	L1RS37	79.08
GCAGCACACCAACATGGCACATGTATACATATGTAACAAACCTGCACGTTGTGCACATGTACCCTAGAACTTAAAGTATAA	L1RS37:+:6061	L1RS37	79.19
CAGCACACCAACATGGCACATGTATACATATGTAACAAACCTGCACGTTGTGCACATGTACCCTAGAACTTAAAGTATAA	L1RS37:+:6062	L1RS37	78.8
AGCACACCAACATGGCACATGTATACATATGTAACAAACCTGCACGTTGTGCACATGTACCCTAGAACTTAAAGTATAA	L1RS37:+:6063	L1RS37	78.39
GCACACCAACATGGCACATGTATACATATGTAACAAACCTGCACGTTGTGCACATGTACCCTAGAACTTAAAGTATAAT	L1RS37:+:6064	L1RS37	78.39
CACACCAACATGGCACATGTATACATATGTAACAAACCTGCACGTTGTGCACATGTACCCTAGAACTTAAAGTATAAT	L1RS37:+:6065	L1RS37	77.97
ACACCAACATGGCACATGTATACATATGTAACAAACCTGCACGTTGTGCACATGTACCCTAGAACTTAAAGTATAAT	L1RS37:+:6066	L1RS37	77.55
CACCAACATGGCACATGTATACATATGTAACAAACCTGCACGTTGTGCACATGTACCCTAGAACTTAAAGTATAAT	L1RS37:+:6067	L1RS37	77.65
ACCAACATGGCACATGTATACATATGTAACAAACCTGCACGTTGTGCACATGTACCCTAGAACTTAAAGTATAAT	L1RS37:+:6068	L1RS37	77.2
CCAACATGGCACATGTATACATATGTAACAAACCTGCACGTTGTGCACATGTACCCTAGAACTTAAAGTATAAT	L1RS37:+:6069	L1RS37	77.3
CAACATGGCACATGTATACATATGTAACAAACCTGCACGTTGTGCACATGTACCCTAGAACTTAAAGTATAAT	L1RS37:+:6070	L1RS37	76.84
AACATGGCACATGTATACATATGTAACAAACCTGCACGTTGTGCACATGTACCCTAGAACTTAAAGTATAAT	L1RS37:+:6071	L1RS37	76.37
ACATGGCACATGTATACATATGTAACAAACCTGCACGTTGTGCACATGTACCCTAGAACTTAAAGTATAAT	L1RS37:+:6072	L1RS37	76.46
CATGGCACATGTATACATATGTAACAAACCTGCACGTTGTGCACATGTACCCTAGAACTTAAAGTATAAT	L1RS37:+:6073	L1RS37	76.55
ATGGCACATGTATACATATGTAACAAACCTGCACGTTGTGCACATGTACCCTAGAACTTAAAGTATAAT	L1RS37:+:6074	L1RS37	76.06
TGGCACATGTATACATATGTAACAAACCTGCACGTTGTGCACATGTACCCTAGAACTTAAAGTATAAT	L1RS37:+:6075	L1RS37	76.15
GGCACATGTATACATATGTAACAAACCTGCACGTTGTGCACATGTACCCTAGAACTTAAAGTATAAT	L1RS37:+:6076	L1RS37	76.24
GCACATGTATACATATGTAACAAACCTGCACGTTGTGCACATGTACCCTAGAACTTAAAGTATAAT	L1RS37:+:6077	L1RS37	75.72
CACATGTATACATATGTAACAAACCTGCACGTTGTGCACATGTACCCTAGAACTTAAAGTATAAT	L1RS37:+:6078	L1RS37	75.17
ACATGTATACATATGTAACAAACCTGCACGTTGTGCACATGTACCCTAGAACTTAAAGTATAAT	L1RS37:+:6079	L1RS37	74.62
CATGTATACATATGTAACAAACCTGCACGTTGTGCACATGTACCCTAGAACTTAAAGTATAAT	L1RS37:+:6080	L1RS37	74.69
ATGTATACATATGTAACAAACCTGCACGTTGTGCACATGTACCCTAGAACTTAAAGTATAAT	L1RS37:+:6081	L1RS37	74.11
TGTATACATATGTAACAAACCTGCACGTTGTGCACATGTACCCTAGAACTTAAAGTATAAT	L1RS37:+:6082	L1RS37	74.18
GTATACATATGTAACAAACCTGCACGTTGTGCACATGTACCCTAGAACTTAAAGTATAAT	L1RS37:+:6083	L1RS37	74.25
TATACATATGTAACAAACCTGCACGTTGTGCACATGTACCCTAGAACTTAAAGTATAAT	L1RS37:+:6084	L1RS37	73.63
ATACATATGTAACAAACCTGCACGTTGTGCACATGTACCCTAGAACTTAAAGTATAAT	L1RS37:+:6085	L1RS37	73.69
TACATATGTAACAAACCTGCACGTTGTGCACATGTACCCTAGAACTTAAAGTATAAT	L1RS37:+:6086	L1RS37	73.76
ACATATGTAACAAACCTGCACGTTGTGCACATGTACCCTAGAACTTAAAGTATAAT	L1RS37:+:6087	L1RS37	73.83
CATATGTAACAAACCTGCACGTTGTGCACATGTACCCTAGAACTTAAAGTATAAT	L1RS37:+:6088	L1RS37	73.9
ATATGTAACAAACCTGCACGTTGTGCACATGTACCCTAGAACTTAAAGTATAAT	L1RS37:+:6089	L1RS37	73.21
TATGTAACAAACCTGCACGTTGTGCACATGTACCCTAGAACTTAAAGTATAAT	L1RS37:+:6090	L1RS37	73.27
ATGTAACAAACCTGCACGTTGTGCACATGTACCCTAGAACTTAAAGTATAAT	L1RS37:+:6091	L1RS37	73.34
TGTAACAAACCTGCACGTTGTGCACATGTACCCTAGAACTTAAAGTATAAT	L1RS37:+:6092	L1RS37	73.41
GTAACAAACCTGCACGTTGTGCACATGTACCCTAGAACTTAAAGTATAAT	L1RS37:+:6093	L1RS37	73.48
TGGGAGAAAAGCTGAGTGTTGGGAAAAGCTGAGGCAGGGCTTGCATGTCTGACATAATGTAAAAGAGTCTTGGAACATG	LTR14B:+:1	LTR14B_HERVK14	80.99
GGGAGAAAAGCTGAGTGTTGGGAAAAGCTGAGGCAGGGCTTGCATGTCTGACATAATGTAAAAGAGTCTTGGAACATG	LTR14B:+:2	LTR14B_HERVK14	81.13
GGAGAAAAGCTGAGTGTTGGGAAAAGCTGAGGCAGGGCTTGCATGTCTGACATAATGTAAAAGAGTCTTGGAACATGTC	LTR14B:+:3	LTR14B_HERVK14	80.99
GAGAAAAGCTGAGTGTTGGGAAAAGCTGAGGCAGGGCTTGCATGTCTGACATAATGTAAAAGAGTCTTGGAACATGTCC	LTR14B:+:4	LTR14B_HERVK14	80.99
AGAAAAGCTGAGTGTTGGGAAAAGCTGAGGCAGGGCTTGCATGTCTGACATAATGTAAAAGAGTCTTGGAACATGTCC	LTR14B:+:5	LTR14B_HERVK14	80.6
GAAAAGCTGAGTGTTGGGAAAAGCTGAGGCAGGGCTTGCATGTCTGACATAATGTAAAAGAGTCTTGGAACATGTCCG	LTR14B:+:6	LTR14B_HERVK14	81.13
AAAAGCTGAGTGTTGGGAAAAGCTGAGGCAGGGCTTGCATGTCTGACATAATGTAAAAGAGTCTTGGAACATGTCCG	LTR14B:+:7	LTR14B_HERVK14	80.74
AAAGCTGAGTGTTGGGAAAAGCTGAGGCAGGGCTTGCATGTCTGACATAATGTAAAAGAGTCTTGGAACATGTCCGG	LTR14B:+:8	LTR14B_HERVK14	81.27
AAGCTGAGTGTTGGGAAAAGCTGAGGCAGGGCTTGCATGTCTGACATAATGTAAAAGAGTCTTGGAACATGTCCGGG	LTR14B:+:9	LTR14B_HERVK14	81.81
AGCTGAGTGTTGGGAAAAGCTGAGGCAGGGCTTGCATGTCTGACATAATGTAAAAGAGTCTTGGAACATGTCCGGGG	LTR14B:+:10	LTR14B_HERVK14	82.34
GCTGAGTGTTGGGAAAAGCTGAGGCAGGGCTTGCATGTCTGACATAATGTAAAAGAGTCTTGGAACATGTCCGGGGTC	LTR14B:+:11	LTR14B_HERVK14	82.7
CTGAGTGTTGGGAAAAGCTGAGGCAGGGCTTGCATGTCTGACATAATGTAAAAGAGTCTTGGAACATGTCCGGGGTC	LTR14B:+:12	LTR14B_HERVK14	82.34
TGAGTGTTGGGAAAAGCTGAGGCAGGGCTTGCATGTCTGACATAATGTAAAAGAGTCTTGGAACATGTCCGGGGTCCA	LTR14B:+:13	LTR14B_HERVK14	82.18
GAGTGTTGGGAAAAGCTGAGGCAGGGCTTGCATGTCTGACATAATGTAAAAGAGTCTTGGAACATGTCCGGGGTCCA	LTR14B:+:14	LTR14B_HERVK14	82.34
AGTGTTGGGAAAAGCTGAGGCAGGGCTTGCATGTCTGACATAATGTAAAAGAGTCTTGGAACATGTCCGGGGTCCA	LTR14B:+:15	LTR14B_HERVK14	81.96
GTGTTGGGAAAAGCTGAGGCAGGGCTTGCATGTCTGACATAATGTAAAAGAGTCTTGGAACATGTCCGGGGTCCAG	LTR14B:+:16	LTR14B_HERVK14	82.5
TGTTGGGAAAAGCTGAGGCAGGGCTTGCATGTCTGACATAATGTAAAAGAGTCTTGGAACATGTCCGGGGTCCAGG	LTR14B:+:17	LTR14B_HERVK14	82.5
GTTGGGAAAAGCTGAGGCAGGGCTTGCATGTCTGACATAATGTAAAAGAGTCTTGGAACATGTCCGGGGTCCAGG	LTR14B:+:18	LTR14B_HERVK14	82.67
TTGGGAAAAGCTGAGGCAGGGCTTGCATGTCTGACATAATGTAAAAGAGTCTTGGAACATGTCCGGGGTCCAGGG	LTR14B:+:19	LTR14B_HERVK14	82.67
TGGGAAAAGCTGAGGCAGGGCTTGCATGTCTGACATAATGTAAAAGAGTCTTGGAACATGTCCGGGGTCCAGGGTC	LTR14B:+:20	LTR14B_HERVK14	83.04
GGGAAAAGCTGAGGCAGGGCTTGCATGTCTGACATAATGTAAAAGAGTCTTGGAACATGTCCGGGGTCCAGGGTC	LTR14B:+:21	LTR14B_HERVK14	83.22
GGAAAAGCTGAGGCAGGGCTTGCATGTCTGACATAATGTAAAAGAGTCTTGGAACATGTCCGGGGTCCAGGGTCTA	LTR14B:+:22	LTR14B_HERVK14	82.5
GAAAAGCTGAGGCAGGGCTTGCATGTCTGACATAATGTAAAAGAGTCTTGGAACATGTCCGGGGTCCAGGGTCTAA	LTR14B:+:23	LTR14B_HERVK14	81.96
AAAAGCTGAGGCAGGGCTTGCATGTCTGACATAATGTAAAAGAGTCTTGGAACATGTCCGGGGTCCAGGGTCTAA	LTR14B:+:24	LTR14B_HERVK14	81.58
AAAGCTGAGGCAGGGCTTGCATGTCTGACATAATGTAAAAGAGTCTTGGAACATGTCCGGGGTCCAGGGTCTAAA	LTR14B:+:25	LTR14B_HERVK14	81.58
AAGCTGAGGCAGGGCTTGCATGTCTGACATAATGTAAAAGAGTCTTGGAACATGTCCGGGGTCCAGGGTCTAAAA	LTR14B:+:26	LTR14B_HERVK14	81.58
AGCTGAGGCAGGGCTTGCATGTCTGACATAATGTAAAAGAGTCTTGGAACATGTCCGGGGTCCAGGGTCTAAAAC	LTR14B:+:27	LTR14B_HERVK14	82.12
GCTGAGGCAGGGCTTGCATGTCTGACATAATGTAAAAGAGTCTTGGAACATGTCCGGGGTCCAGGGTCTAAAACC	LTR14B:+:28	LTR14B_HERVK14	82.67
CTGAGGCAGGGCTTGCATGTCTGACATAATGTAAAAGAGTCTTGGAACATGTCCGGGGTCCAGGGTCTAAAACC	LTR14B:+:29	LTR14B_HERVK14	82.29
TGAGGCAGGGCTTGCATGTCTGACATAATGTAAAAGAGTCTTGGAACATGTCCGGGGTCCAGGGTCTAAAACCC	LTR14B:+:30	LTR14B_HERVK14	82.29
GAGGCAGGGCTTGCATGTCTGACATAATGTAAAAGAGTCTTGGAACATGTCCGGGGTCCAGGGTCTAAAACCC	LTR14B:+:31	LTR14B_HERVK14	82.46
AGGCAGGGCTTGCATGTCTGACATAATGTAAAAGAGTCTTGGAACATGTCCGGGGTCCAGGGTCTAAAACCC	LTR14B:+:32	LTR14B_HERVK14	82.06
GGCAGGGCTTGCATGTCTGACATAATGTAAAAGAGTCTTGGAACATGTCCGGGGTCCAGGGTCTAAAACCCC	LTR14B:+:33	LTR14B_HERVK14	82.63
GCAGGGCTTGCATGTCTGACATAATGTAAAAGAGTCTTGGAACATGTCCGGGGTCCAGGGTCTAAAACCCCTC	LTR14B:+:34	LTR14B_HERVK14	82.46
CAGGGCTTGCATGTCTGACATAATGTAAAAGAGTCTTGGAACATGTCCGGGGTCCAGGGTCTAAAACCCCTC	LTR14B:+:35	LTR14B_HERVK14	82.06
AGGGCTTGCATGTCTGACATAATGTAAAAGAGTCTTGGAACATGTCCGGGGTCCAGGGTCTAAAACCCCTC	LTR14B:+:36	LTR14B_HERVK14	81.66
GGGCTTGCATGTCTGACATAATGTAAAAGAGTCTTGGAACATGTCCGGGGTCCAGGGTCTAAAACCCCTCG	LTR14B:+:37	LTR14B_HERVK14	82.24
GGCTTGCATGTCTGACATAATGTAAAAGAGTCTTGGAACATGTCCGGGGTCCAGGGTCTAAAACCCCTCGTG	LTR14B:+:38	LTR14B_HERVK14	82.06
GCTTGCATGTCTGACATAATGTAAAAGAGTCTTGGAACATGTCCGGGGTCCAGGGTCTAAAACCCCTCGTGGC	LTR14B:+:39	LTR14B_HERVK14	82.46
CTTGCATGTCTGACATAATGTAAAAGAGTCTTGGAACATGTCCGGGGTCCAGGGTCTAAAACCCCTCGTGGC	LTR14B:+:40	LTR14B_HERVK14	82.06
TTCTCTCTCAAACTGTCTTTTCTCATTCCTTTGACTCCGCCGGACTTCGTCACCCCCACGACCTGGTGTTG	LTR14B:+:520	LTR14B_HERVK14	82.81
TCTCTCTCAAACTGTCTTTTCTCATTCCTTTGACTCCGCCGGACTTCGTCACCCCCACGACCTGGTGTTGG	LTR14B:+:521	LTR14B_HERVK14	83.39
CTCTCTCAAACTGTCTTTTCTCATTCCTTTGACTCCGCCGGACTTCGTCACCCCCACGACCTGGTGTTGG	LTR14B:+:522	LTR14B_HERVK14	83.58
TCTCTCAAACTGTCTTTTCTCATTCCTTTGACTCCGCCGGACTTCGTCACCCCCACGACCTGGTGTTGGG	LTR14B:+:523	LTR14B_HERVK14	83.58
CTCTCAAACTGTCTTTTCTCATTCCTTTGACTCCGCCGGACTTCGTCACCCCCACGACCTGGTGTTGGG	LTR14B:+:524	LTR14B_HERVK14	83.78
TCTCAAACTGTCTTTTCTCATTCCTTTGACTCCGCCGGACTTCGTCACCCCCACGACCTGGTGTTGGGTC	LTR14B:+:525	LTR14B_HERVK14	83.58
CTCAAACTGTCTTTTCTCATTCCTTTGACTCCGCCGGACTTCGTCACCCCCACGACCTGGTGTTGGGTC	LTR14B:+:526	LTR14B_HERVK14	83.78
TCAAACTGTCTTTTCTCATTCCTTTGACTCCGCCGGACTTCGTCACCCCCACGACCTGGTGTTGGGTCTGA	LTR14B:+:527	LTR14B_HERVK14	83.39
CAAACTGTCTTTTCTCATTCCTTTGACTCCGCCGGACTTCGTCACCCCCACGACCTGGTGTTGGGTCTGA	LTR14B:+:528	LTR14B_HERVK14	83.58
AAACTGTCTTTTCTCATTCCTTTGACTCCGCCGGACTTCGTCACCCCCACGACCTGGTGTTGGGTCTGA	LTR14B:+:529	LTR14B_HERVK14	83.19
AACTGTCTTTTCTCATTCCTTTGACTCCGCCGGACTTCGTCACCCCCACGACCTGGTGTTGGGTCTGATCA	LTR14B:+:530	LTR14B_HERVK14	83.39
ACTGTCTTTTCTCATTCCTTTGACTCCGCCGGACTTCGTCACCCCCACGACCTGGTGTTGGGTCTGATCAC	LTR14B:+:531	LTR14B_HERVK14	83.97
CTGTCTTTTCTCATTCCTTTGACTCCGCCGGACTTCGTCACCCCCACGACCTGGTGTTGGGTCTGATCACC	LTR14B:+:532	LTR14B_HERVK14	84.54
TGTCTTTTCTCATTCCTTTGACTCCGCCGGACTTCGTCACCCCCACGACCTGGTGTTGGGTCTGATCACCC	LTR14B:+:533	LTR14B_HERVK14	84.54
GTCTTTTCTCATTCCTTTGACTCCGCCGGACTTCGTCACCCCCACGACCTGGTGTTGGGTCTGATCACCC	LTR14B:+:534	LTR14B_HERVK14	84.75
TCTTTTCTCATTCCTTTGACTCCGCCGGACTTCGTCACCCCCACGACCTGGTGTTGGGTCTGATCACCCCA	LTR14B:+:535	LTR14B_HERVK14	84.54
CTTTTCTCATTCCTTTGACTCCGCCGGACTTCGTCACCCCCACGACCTGGTGTTGGGTCTGATCACCCCA	LTR14B:+:536	LTR14B_HERVK14	84.75
TTTTCTCATTCCTTTGACTCCGCCGGACTTCGTCACCCCCACGACCTGGTGTTGGGTCTGATCACCCCAA	LTR14B:+:537	LTR14B_HERVK14	84.17
TTTCTCATTCCTTTGACTCCGCCGGACTTCGTCACCCCCACGACCTGGTGTTGGGTCTGATCACCCCAACA	LTR14B:+:538	LTR14B_HERVK14	84.54
TTCTCATTCCTTTGACTCCGCCGGACTTCGTCACCCCCACGACCTGGTGTTGGGTCTGATCACCCCAACA	LTR14B:+:539	LTR14B_HERVK14	84.75
TCTCATTCCTTTGACTCCGCCGGACTTCGTCACCCCCACGACCTGGTGTTGGGTCTGATCACCCCAACA	LTR14B:+:540	LTR14B_HERVK14	84.97
CTCATTCCTTTGACTCCGCCGGACTTCGTCACCCCCACGACCTGGTGTTGGGTCTGATCACCCCAACA	LTR14B:+:541	LTR14B_HERVK14	85.19
TCATTCCTTTGACTCCGCCGGACTTCGTCACCCCCACGACCTGGTGTTGGGTCTGATCACCCCAACA	LTR14B:+:542	LTR14B_HERVK14	84.81
CATTCCTTTGACTCCGCCGGACTTCGTCACCCCCACGACCTGGTGTTGGGTCTGATCACCCCAACA	LTR14B:+:543	LTR14B_HERVK14	85.03
ATTCCTTTGACTCCGCCGGACTTCGTCACCCCCACGACCTGGTGTTGGGTCTGATCACCCCAACA	LTR14B:+:544	LTR14B_HERVK14	84.64
TTCCTTTGACTCCGCCGGACTTCGTCACCCCCACGACCTGGTGTTGGGTCTGATCACCCCAACA	LTR14B:+:545	LTR14B_HERVK14	84.87
TCCTTTGACTCCGCCGGACTTCGTCACCCCCACGACCTGGTGTTGGGTCTGATCACCCCAACA	LTR14B:+:546	LTR14B_HERVK14	85.1
CCTTTGACTCCGCCGGACTTCGTCACCCCCACGACCTGGTGTTGGGTCTGATCACCCCAACA	LTR14B:+:547	LTR14B_HERVK14	85.35
CTTTGACTCCGCCGGACTTCGTCACCCCCACGACCTGGTGTTGGGTCTGATCACCCCAACA	LTR14B:+:548	LTR14B_HERVK14	84.93
TTTGACTCCGCCGGACTTCGTCACCCCCACGACCTGGTGTTGGGTCTGATCACCCCAACA	LTR14B:+:549	LTR14B_HERVK14	84.5
TTGACTCCGCCGGACTTCGTCACCCCCACGACCTGGTGTTGGGTCTGATCACCCCAACA	LTR14B:+:550	LTR14B_HERVK14	84.74
TGACTCCGCCGGACTTCGTCACCCCCACGACCTGGTGTTGGGTCTGATCACCCCAACA	LTR14B:+:551	LTR14B_HERVK14	85
GACTCCGCCGGACTTCGTCACCCCCACGACCTGGTGTTGGGTCTGATCACCCCAACA	LTR14B:+:552	LTR14B_HERVK14	85.27
ACTCCGCCGGACTTCGTCACCCCCACGACCTGGTGTTGGGTCTGATCACCCCAACA	LTR14B:+:553	LTR14B_HERVK14	84.81
CTCCGCCGGACTTCGTCACCCCCACGACCTGGTGTTGGGTCTGATCACCCCAACA	LTR14B:+:554	LTR14B_HERVK14	85.08
TCCGCCGGACTTCGTCACCCCCACGACCTGGTGTTGGGTCTGATCACCCCAACA	LTR14B:+:555	LTR14B_HERVK14	84.6
CCGCCGGACTTCGTCACCCCCACGACCTGGTGTTGGGTCTGATCACCCCAACA	LTR14B:+:556	LTR14B_HERVK14	84.88
CGCCGGACTTCGTCACCCCCACGACCTGGTGTTGGGTCTGATCACCCCAACA	LTR14B:+:557	LTR14B_HERVK14	84.38
GCCGGACTTCGTCACCCCCACGACCTGGTGTTGGGTCTGATCACCCCAACA	LTR14B:+:558	LTR14B_HERVK14	83.86
CCGGACTTCGTCACCCCCACGACCTGGTGTTGGGTCTGATCACCCCAACA	LTR14B:+:559	LTR14B_HERVK14	83.32
TGAAAGAAATCAGGCACATTCCTCAGCCCCGGGCTCAACACAAACAGGCCCAGTACAAACACATCCCACCATATATC	MacERV1_LTR4:+:1	LTR4_MacERV1	82.34
GAAAGAAATCAGGCACATTCCTCAGCCCCGGGCTCAACACAAACAGGCCCAGTACAAACACATCCCACCATATATC	MacERV1_LTR4:+:2	LTR4_MacERV1	82.5
AAAGAAATCAGGCACATTCCTCAGCCCCGGGCTCAACACAAACAGGCCCAGTACAAACACATCCCACCATATATC	MacERV1_LTR4:+:3	LTR4_MacERV1	82.12
AAGAAATCAGGCACATTCCTCAGCCCCGGGCTCAACACAAACAGGCCCAGTACAAACACATCCCACCATATATCTC	MacERV1_LTR4:+:4	LTR4_MacERV1	82.5
AGAAATCAGGCACATTCCTCAGCCCCGGGCTCAACACAAACAGGCCCAGTACAAACACATCCCACCATATATCTCTCA	MacERV1_LTR4:+:5	LTR4_MacERV1	82.7
GAAATCAGGCACATTCCTCAGCCCCGGGCTCAACACAAACAGGCCCAGTACAAACACATCCCACCATATATCTCTCAA	MacERV1_LTR4:+:6	LTR4_MacERV1	82.7
AAATCAGGCACATTCCTCAGCCCCGGGCTCAACACAAACAGGCCCAGTACAAACACATCCCACCATATATCTCTCAA	MacERV1_LTR4:+:7	LTR4_MacERV1	82.34
AATCAGGCACATTCCTCAGCCCCGGGCTCAACACAAACAGGCCCAGTACAAACACATCCCACCATATATCTCTCAAC	MacERV1_LTR4:+:8	LTR4_MacERV1	82.87
ATCAGGCACATTCCTCAGCCCCGGGCTCAACACAAACAGGCCCAGTACAAACACATCCCACCATATATCTCTCAACT	MacERV1_LTR4:+:9	LTR4_MacERV1	82.87
TCAGGCACATTCCTCAGCCCCGGGCTCAACACAAACAGGCCCAGTACAAACACATCCCACCATATATCTCTCAACTTC	MacERV1_LTR4:+:10	LTR4_MacERV1	83.23
CAGGCACATTCCTCAGCCCCGGGCTCAACACAAACAGGCCCAGTACAAACACATCCCACCATATATCTCTCAACTTC	MacERV1_LTR4:+:11	LTR4_MacERV1	83.4
AGGCACATTCCTCAGCCCCGGGCTCAACACAAACAGGCCCAGTACAAACACATCCCACCATATATCTCTCAACTTC	MacERV1_LTR4:+:12	LTR4_MacERV1	83.04
GGCACATTCCTCAGCCCCGGGCTCAACACAAACAGGCCCAGTACAAACACATCCCACCATATATCTCTCAACTTCC	MacERV1_LTR4:+:13	LTR4_MacERV1	83.58
GCACATTCCTCAGCCCCGGGCTCAACACAAACAGGCCCAGTACAAACACATCCCACCATATATCTCTCAACTTCCTGA	MacERV1_LTR4:+:14	LTR4_MacERV1	83.23
CACATTCCTCAGCCCCGGGCTCAACACAAACAGGCCCAGTACAAACACATCCCACCATATATCTCTCAACTTCCTGA	MacERV1_LTR4:+:15	LTR4_MacERV1	82.87
ACATTCCTCAGCCCCGGGCTCAACACAAACAGGCCCAGTACAAACACATCCCACCATATATCTCTCAACTTCCTGA	MacERV1_LTR4:+:16	LTR4_MacERV1	82.5
CATTCCTCAGCCCCGGGCTCAACACAAACAGGCCCAGTACAAACACATCCCACCATATATCTCTCAACTTCCTGAGC	MacERV1_LTR4:+:17	LTR4_MacERV1	83.4
ATTCCTCAGCCCCGGGCTCAACACAAACAGGCCCAGTACAAACACATCCCACCATATATCTCTCAACTTCCTGAGC	MacERV1_LTR4:+:18	LTR4_MacERV1	83.04
TTCCTCAGCCCCGGGCTCAACACAAACAGGCCCAGTACAAACACATCCCACCATATATCTCTCAACTTCCTGAGCC	MacERV1_LTR4:+:19	LTR4_MacERV1	83.58
TCCTCAGCCCCGGGCTCAACACAAACAGGCCCAGTACAAACACATCCCACCATATATCTCTCAACTTCCTGAGCCCA	MacERV1_LTR4:+:20	LTR4_MacERV1	83.94
CCTCAGCCCCGGGCTCAACACAAACAGGCCCAGTACAAACACATCCCACCATATATCTCTCAACTTCCTGAGCCCA	MacERV1_LTR4:+:21	LTR4_MacERV1	84.12
CTCAGCCCCGGGCTCAACACAAACAGGCCCAGTACAAACACATCCCACCATATATCTCTCAACTTCCTGAGCCCAG	MacERV1_LTR4:+:22	LTR4_MacERV1	84.12
TCAGCCCCGGGCTCAACACAAACAGGCCCAGTACAAACACATCCCACCATATATCTCTCAACTTCCTGAGCCCAGTA	MacERV1_LTR4:+:23	LTR4_MacERV1	83.4
CAGCCCCGGGCTCAACACAAACAGGCCCAGTACAAACACATCCCACCATATATCTCTCAACTTCCTGAGCCCAGTA	MacERV1_LTR4:+:24	LTR4_MacERV1	83.58
AGCCCCGGGCTCAACACAAACAGGCCCAGTACAAACACATCCCACCATATATCTCTCAACTTCCTGAGCCCAGTA	MacERV1_LTR4:+:25	LTR4_MacERV1	83.22
GCCCCGGGCTCAACACAAACAGGCCCAGTACAAACACATCCCACCATATATCTCTCAACTTCCTGAGCCCAGTACA	MacERV1_LTR4:+:26	LTR4_MacERV1	83.58
CCCCGGGCTCAACACAAACAGGCCCAGTACAAACACATCCCACCATATATCTCTCAACTTCCTGAGCCCAGTACA	MacERV1_LTR4:+:27	LTR4_MacERV1	83.22
CCCGGGCTCAACACAAACAGGCCCAGTACAAACACATCCCACCATATATCTCTCAACTTCCTGAGCCCAGTACAA	MacERV1_LTR4:+:28	LTR4_MacERV1	82.67
CCGGGCTCAACACAAACAGGCCCAGTACAAACACATCCCACCATATATCTCTCAACTTCCTGAGCCCAGTACAAA	MacERV1_LTR4:+:29	LTR4_MacERV1	82.12
CGGGCTCAACACAAACAGGCCCAGTACAAACACATCCCACCATATATCTCTCAACTTCCTGAGCCCAGTACAAACA	MacERV1_LTR4:+:30	LTR4_MacERV1	81.96
GGGCTCAACACAAACAGGCCCAGTACAAACACATCCCACCATATATCTCTCAACTTCCTGAGCCCAGTACAAACACA	MacERV1_LTR4:+:31	LTR4_MacERV1	81.81
GGCTCAACACAAACAGGCCCAGTACAAACACATCCCACCATATATCTCTCAACTTCCTGAGCCCAGTACAAACACATC	MacERV1_LTR4:+:32	LTR4_MacERV1	81.65
GCTCAACACAAACAGGCCCAGTACAAACACATCCCACCATATATCTCTCAACTTCCTGAGCCCAGTACAAACACATCC	MacERV1_LTR4:+:33	LTR4_MacERV1	81.65
CTCAACACAAACAGGCCCAGTACAAACACATCCCACCATATATCTCTCAACTTCCTGAGCCCAGTACAAACACATCC	MacERV1_LTR4:+:34	LTR4_MacERV1	81.27
TCAACACAAACAGGCCCAGTACAAACACATCCCACCATATATCTCTCAACTTCCTGAGCCCAGTACAAACACATCCCA	MacERV1_LTR4:+:35	LTR4_MacERV1	81.13
CAACACAAACAGGCCCAGTACAAACACATCCCACCATATATCTCTCAACTTCCTGAGCCCAGTACAAACACATCCCA	MacERV1_LTR4:+:36	LTR4_MacERV1	81.27
AACACAAACAGGCCCAGTACAAACACATCCCACCATATATCTCTCAACTTCCTGAGCCCAGTACAAACACATCCCA	MacERV1_LTR4:+:37	LTR4_MacERV1	80.88
ACACAAACAGGCCCAGTACAAACACATCCCACCATATATCTCTCAACTTCCTGAGCCCAGTACAAACACATCCCAC	MacERV1_LTR4:+:38	LTR4_MacERV1	81.42
CACAAACAGGCCCAGTACAAACACATCCCACCATATATCTCTCAACTTCCTGAGCCCAGTACAAACACATCCCACCA	MacERV1_LTR4:+:39	LTR4_MacERV1	81.81
ACAAACAGGCCCAGTACAAACACATCCCACCATATATCTCTCAACTTCCTGAGCCCAGTACAAACACATCCCACCA	MacERV1_LTR4:+:40	LTR4_MacERV1	81.42
TCGAACTTGCAGTAAAAGATCCTTGCCGCTTGGCTTTGACTCTGGACTCTGGTGGTCTTCTTTGGGGAACAAA	MacERV1_LTR4:+:389	LTR4_MacERV1	81.34
CGAACTTGCAGTAAAAGATCCTTGCCGCTTGGCTTTGACTCTGGACTCTGGTGGTCTTCTTTGGGGAACAAA	MacERV1_LTR4:+:390	LTR4_MacERV1	81.49
GAACTTGCAGTAAAAGATCCTTGCCGCTTGGCTTTGACTCTGGACTCTGGTGGTCTTCTTTGGGGAACAAAC	MacERV1_LTR4:+:391	LTR4_MacERV1	81.49
AACTTGCAGTAAAAGATCCTTGCCGCTTGGCTTTGACTCTGGACTCTGGTGGTCTTCTTTGGGGAACAAAC	MacERV1_LTR4:+:392	LTR4_MacERV1	81.08
ACTTGCAGTAAAAGATCCTTGCCGCTTGGCTTTGACTCTGGACTCTGGTGGTCTTCTTTGGGGAACAAACG	MacERV1_LTR4:+:393	LTR4_MacERV1	81.66
CTTGCAGTAAAAGATCCTTGCCGCTTGGCTTTGACTCTGGACTCTGGTGGTCTTCTTTGGGGAACAAACGG	MacERV1_LTR4:+:394	LTR4_MacERV1	82.24
TTGCAGTAAAAGATCCTTGCCGCTTGGCTTTGACTCTGGACTCTGGTGGTCTTCTTTGGGGAACAAACGGTC	MacERV1_LTR4:+:395	LTR4_MacERV1	82.06
TGCAGTAAAAGATCCTTGCCGCTTGGCTTTGACTCTGGACTCTGGTGGTCTTCTTTGGGGAACAAACGGTCTG	MacERV1_LTR4:+:396	LTR4_MacERV1	82.46
GCAGTAAAAGATCCTTGCCGCTTGGCTTTGACTCTGGACTCTGGTGGTCTTCTTTGGGGAACAAACGGTCTG	MacERV1_LTR4:+:397	LTR4_MacERV1	82.63
CAGTAAAAGATCCTTGCCGCTTGGCTTTGACTCTGGACTCTGGTGGTCTTCTTTGGGGAACAAACGGTCTG	MacERV1_LTR4:+:398	LTR4_MacERV1	82.24
AGTAAAAGATCCTTGCCGCTTGGCTTTGACTCTGGACTCTGGTGGTCTTCTTTGGGGAACAAACGGTCTG	MacERV1_LTR4:+:399	LTR4_MacERV1	81.83
GTAAAAGATCCTTGCCGCTTGGCTTTGACTCTGGACTCTGGTGGTCTTCTTTGGGGAACAAACGGTCTGG	MacERV1_LTR4:+:400	LTR4_MacERV1	82.41
TAAAAGATCCTTGCCGCTTGGCTTTGACTCTGGACTCTGGTGGTCTTCTTTGGGGAACAAACGGTCTGGGCA	MacERV1_LTR4:+:401	LTR4_MacERV1	82.63
AAAAGATCCTTGCCGCTTGGCTTTGACTCTGGACTCTGGTGGTCTTCTTTGGGGAACAAACGGTCTGGGCA	MacERV1_LTR4:+:402	LTR4_MacERV1	82.81
AAAGATCCTTGCCGCTTGGCTTTGACTCTGGACTCTGGTGGTCTTCTTTGGGGAACAAACGGTCTGGGCATA	MacERV1_LTR4:+:403	LTR4_MacERV1	82.63
AAGATCCTTGCCGCTTGGCTTTGACTCTGGACTCTGGTGGTCTTCTTTGGGGAACAAACGGTCTGGGCATAA	MacERV1_LTR4:+:404	LTR4_MacERV1	82.63
AGATCCTTGCCGCTTGGCTTTGACTCTGGACTCTGGTGGTCTTCTTTGGGGAACAAACGGTCTGGGCATAACA	MacERV1_LTR4:+:405	LTR4_MacERV1	83.02
GATCCTTGCCGCTTGGCTTTGACTCTGGACTCTGGTGGTCTTCTTTGGGGAACAAACGGTCTGGGCATAACA	MacERV1_LTR4:+:406	LTR4_MacERV1	83.2
ATCCTTGCCGCTTGGCTTTGACTCTGGACTCTGGTGGTCTTCTTTGGGGAACAAACGGTCTGGGCATAACA	MacERV1_LTR4:+:407	LTR4_MacERV1	82.81
TCCTTGCCGCTTGGCTTTGACTCTGGACTCTGGTGGTCTTCTTTGGGGAACAAACGGTCTGGGCATAACA	MacERV1_LTR4:+:408	LTR4_MacERV1	83
CCTTGCCGCTTGGCTTTGACTCTGGACTCTGGTGGTCTTCTTTGGGGAACAAACGGTCTGGGCATAACA	MacERV1_LTR4:+:409	LTR4_MacERV1	83.19
CTTGCCGCTTGGCTTTGACTCTGGACTCTGGTGGTCTTCTTTGGGGAACAAACGGTCTGGGCATAACA	MacERV1_LTR4:+:410	LTR4_MacERV1	82.78
TTGCCGCTTGGCTTTGACTCTGGACTCTGGTGGTCTTCTTTGGGGAACAAACGGTCTGGGCATAACA	MacERV1_LTR4:+:411	LTR4_MacERV1	82.36
TGCCGCTTGGCTTTGACTCTGGACTCTGGTGGTCTTCTTTGGGGAACAAACGGTCTGGGCATAACA	MacERV1_LTR4:+:412	LTR4_MacERV1	82.55
GCCGCTTGGCTTTGACTCTGGACTCTGGTGGTCTTCTTTGGGGAACAAACGGTCTGGGCATAACA	MacERV1_LTR4:+:413	LTR4_MacERV1	82.74
CCGCTTGGCTTTGACTCTGGACTCTGGTGGTCTTCTTTGGGGAACAAACGGTCTGGGCATAACA	MacERV1_LTR4:+:414	LTR4_MacERV1	82.3
CGCTTGGCTTTGACTCTGGACTCTGGTGGTCTTCTTTGGGGAACAAACGGTCTGGGCATAACA	MacERV1_LTR4:+:415	LTR4_MacERV1	81.85
GCTTGGCTTTGACTCTGGACTCTGGTGGTCTTCTTTGGGGAACAAACGGTCTGGGCATAACA	MacERV1_LTR4:+:416	LTR4_MacERV1	81.38
CTTGGCTTTGACTCTGGACTCTGGTGGTCTTCTTTGGGGAACAAACGGTCTGGGCATAACA	MacERV1_LTR4:+:417	LTR4_MacERV1	80.9
TTGGCTTTGACTCTGGACTCTGGTGGTCTTCTTTGGGGAACAAACGGTCTGGGCATAACA	MacERV1_LTR4:+:418	LTR4_MacERV1	80.4
TGGCTTTGACTCTGGACTCTGGTGGTCTTCTTTGGGGAACAAACGGTCTGGGCATAACA	MacERV1_LTR4:+:419	LTR4_MacERV1	80.58
GGCTTTGACTCTGGACTCTGGTGGTCTTCTTTGGGGAACAAACGGTCTGGGCATAACA	MacERV1_LTR4:+:420	LTR4_MacERV1	80.76
GCTTTGACTCTGGACTCTGGTGGTCTTCTTTGGGGAACAAACGGTCTGGGCATAACA	MacERV1_LTR4:+:421	LTR4_MacERV1	80.23
CTTTGACTCTGGACTCTGGTGGTCTTCTTTGGGGAACAAACGGTCTGGGCATAACA	MacERV1_LTR4:+:422	LTR4_MacERV1	79.68
TTTGACTCTGGACTCTGGTGGTCTTCTTTGGGGAACAAACGGTCTGGGCATAACA	MacERV1_LTR4:+:423	LTR4_MacERV1	79.12
TTGACTCTGGACTCTGGTGGTCTTCTTTGGGGAACAAACGGTCTGGGCATAACA	MacERV1_LTR4:+:424	LTR4_MacERV1	79.29
TGACTCTGGACTCTGGTGGTCTTCTTTGGGGAACAAACGGTCTGGGCATAACA	MacERV1_LTR4:+:425	LTR4_MacERV1	79.46
GACTCTGGACTCTGGTGGTCTTCTTTGGGGAACAAACGGTCTGGGCATAACA	MacERV1_LTR4:+:426	LTR4_MacERV1	79.65
ACTCTGGACTCTGGTGGTCTTCTTTGGGGAACAAACGGTCTGGGCATAACA	MacERV1_LTR4:+:427	LTR4_MacERV1	79.03
CTCTGGACTCTGGTGGTCTTCTTTGGGGAACAAACGGTCTGGGCATAACA	MacERV1_LTR4:+:428	LTR4_MacERV1	79.22

## Sheet: Locus amplification QC primers
Chromosome	Start	Stop	Fwd_primer	Rev_primer
1	112961422	112961670	GGGACCCCAGGCTGGATGTT	GGGTCAGCAGGAGGAGGAGG
2	60898777	60899306	AGCCCCTGCACCTGGCAACTGTTT	TTAAGTGGAGGGCCCGGCAAGACCA
3	98355944	98356725	TGGGTGTGGAGGCCTCGCCAATTT	TTGCCTCATTGCGGCTGGCGTT
4	55547857	55548309	ACTGCACTGAGGTCCCTGGGTTGGT	ACTCAGCAGCAGCGCAAGGCAA
9	69901077	69901782	AGGTGGGGGCGAAAGGAGAGTGGAA	ACCGCACCCAATCCAGCCAAAGCA
10	56797396	56797908	AGCGGGTTTGCACAAGGGCAGT	ATGCCTTTGGCTGGGGTGACCA
11	63955215	63955547	TTGGCCAGCACGGACGCTCCATTT	TGCAAAGGTTCTGGGGGAAGGCGA
12	78208404	78209064	CCCCGTGCACCTTCGTTAGC	GCTGCCTGCATGATCCCCAC
13	54117665	54117931	TGCTGGACTTGCAGACCGGA	GGCCTTTGGGAGGGGGCTTA
14	66930226	66930815	GCGGCGCCTTTGAGGATTCA	GCACCCGGCTTGGATGTCAG
15	56835216	56836104	TCTGCAGTGGTGGTGAGCCA	AATCACCCCCTGTCCCAGCC
X	69664440	69665196	GCCTTGCTCACGGCTAACCC	GTTCCGTTGCTGGCGAGGAG
