# Supplementary material for: Somatic retrotransposition in the developing rhesus macaque brain
Source: HighWire-hosted journal article supplement (doi:10.1101/gr.276451.121), 2022-06-21
Supplement: Supplemental_Table_S2.xlsx [file Supplemental_Table_S2.xlsx]

## Sheet: germline
Supplemental Table S2. TEBreak germline and somatic TE insertion calls, and additional PCR validation information. Columns are as described in the TEBreak documentation (https://github.com/adamewing/tebreak).
UUID	Chromosome	5_Prime_End	3_Prime_End	Superfamily	Subfamily	TE_Align_Start	TE_Align_End	Orient_5p	Orient_3p	Inversion	TSD	Sample_support_5p	Sample_support_3p	Genomic_Consensus_5p	Genomic_Consensus_3p	Insert_Consensus_5p	Insert_Consensus_3p
7323ab8c-188a-4295-a867-1ad6f976c300	Chr1	878168	878154	ALU	Alu_YRa4	0	270	+	+	N	GAGATATAGAAAATC	Hippocampus.Single.WGS.ON22212.Neuron-#19|11,Hippocampus.Single.WGS.ON22212.Neuron-#21|5,Liver.Bulk.WGS.ON22212|6,Hippocampus.Single.RC-seq.ON22212.Neuron-#19|2,Hippocampus.Single.RC-seq.ON22212.Neuron-#21|1	Hippocampus.Single.WGS.ON22212.Neuron-#19|23,Hippocampus.Single.WGS.ON22212.Neuron-#21|8,Liver.Bulk.WGS.ON22212|16,Hippocampus.Single.RC-seq.ON22212.Neuron-#19|5,Hippocampus.Single.RC-seq.ON22212.Neuron-#21|1	AATATAGATAGATAGATATAGAGATATCTATATATATCTCAAACCAGGTTTTACAATAGTTTATATTTTTTTGCATTGTAGCAATAAATTCTATAAGATTAAATGATGTTGTCAACCCCTCAGTGCAGACGTAAAGTGGAATGCAGTTCTGCTGTGACAGTGGGAGGAGTGTAAGTAACCTGGGGGTGATGATGGAGGAGGGAGCAGGCCACTATCCGTGGGAGCCTGTATCATGGATCAAGGAATGGAATTTGAGATATAGAAAATCGGCCGGGCGCGGTGGCTCAAGCCTGTAATCCCAGCACTTTGGGAGGCCGAGACGGGCGGATCACGAGGTCAGGAGTTCGAGACCATCCTGGCTAACACGGTGAAACCCCGTCTCTACTAAAAAATACAAAA…	CCGGGAGGCAGGGCTTGGAGGGAGCCGAAATCCGGCCCCTGCACCCCAGCCGGGGGGACACAGCGAGACCCCGTTCCAAAAAAAAAAAAAAAAAAAAAAAAAAGAGATATAGAAAATCAAGCATTAACAGATGAATGTATTGTCTGAAAATACATGGACAAATATGAGAGGGAAAACTGAGGGAAAGATATTTTGATGTCCTTGTCTTTGGGGTCAGCAAGAGTTTGTTATTTTTCTAACATTTCACCCTGTGGT	TGACAGTGGGAGGAGTGTAAGTAACCTGGGGGTGATGATGGAGGAGGGAGCAGGCCACTATCCGTGGGAGCCTGTATCATGGATCAAGGAATGGAATTTGAGATATAGAAAATCGGCCGGGCGCGGTGGCTCAAGCCTGTAATCCCAGCACTTTGGGACGGGCCCGAGACGGGCGGATCACGAGGTCAGGAGTTCGTAGACCATCCTGGCTAACACGGTGAAACCCCGTCTCTACTAAAAAATACAAAAAACTAGCCGGGCGAGGTGGCGGGCACCTGTAGTCCCGGCTACTCGGGAGGCTGAGGCAGGAGAATGGCGTAAAAACCCGGGAGGCAGAGCTTGCAGTGAGCCGAGATCCGGCCACTGCACTCCAGCCTGGGCGACACAGCGAGACTCCGT…	TGACAGTGGGAGGAGTGTAAGTAACCTGGGGGTGATGATGGAGGAGGGAGCAGGCCACTATCCGTGGGAGCCTGTATCATGGATCAAGGAATGGAATTTGAGATATAGAAAATCGGCCGGGCGCGGTGGCTCAAGCCTGTAATCCCAGCACTTTGGGACGGGCCCGAGACGGGCGGATCACGAGGTCAGGAGTTCGTAGACCATCCTGGCTAACACGGTGAAACCCCGTCTCTACTAAAAAATACAAAAAACTAGCCGGGCGAGGTGGCGGGCACCTGTAGTCCCGGCTACTCGGGAGGCTGAGGCAGGAGAATGGCGTAAAAACCCGGGAGGCAGAGCTTGCAGTGAGCCGAGATCCGGCCACTGCACTCCAGCCTGGGCGACACAGCGAGACTCCGT…
71f1b103-b306-4af9-9172-871b0f5199f5	Chr1	996546	996558	ALU	Alu_YRa4	0	269	+	+	N	TAAAATGCCCTTG	Hippocampus.Single.WGS.ON22213.Neuron-#69|67,Hippocampus.Single.WGS.ON22213.Neuron-#31|1,Hippocampus.Single.WGS.ON22213.Neuron-#52|1,Liver.Bulk.WGS.ON22213|13,Hippocampus.Single.RC-seq.ON22213.Neuron-#69|9,Hippocampus.Single.RC-seq.ON22213.Neuron-#31|1	Hippocampus.Single.WGS.ON22213.Neuron-#69|63,Hippocampus.Single.WGS.ON22213.Neuron-#31|1,Liver.Bulk.WGS.ON22213|17,Hippocampus.Single.RC-seq.ON22213.Neuron-#15|1,Hippocampus.Single.RC-seq.ON22213.Neuron-#69|17	ATATAGGGTAACTTCTGGACCTTGCCATGGCATTTGTAAACTGTCATGGTGCTGTTGGGAGTTTCCTTTGGTATGCTAATGTATTCTAATTATAACGAGCAGTGAGGACCACCGGAGGTGGGTTTCATTGCTATGATGGTTTTGGTAGGTTTTGGTCAGCTTATTTACCACATCCTGTTTTATCAGTGGAGTCTTTGTTACTTGTATCTTGTGAAACAAGTCCAGCTGAATTCCTGTCTCCAGAATATTCAAGGGCATTTTATTTTATTTTATTTTATTTATTTATTTTTTTGAGATGGAGTCTTGCTCTGTAGCCCGGGCTGGAGTGCAGTGGCCGGATCTCAGCTCACTGCAAGCTCCGCCCCCCGGGTTTACGCCATTCTCCTGCCTCAGCCTCCG…	ATATAGGGTAACTTCTGGACCTTGCCATGGCATTTGTAAACTGTCATGGTGCTGTTGGGAGTTTCCTTTGGTATGCTAATGTATTCTAATTATAACGAGCAGTGAGGACCACCGGAGGTGGGTTTCATTGCTATGATGGTTTTGGTAGGTTTTGGTCAGCTTATTTACCACATCCTGTTTTATCAGTGGAGTCTTTGTTACTTGTATCTTGTGAAACAAGTCCAGCTGAATTCCTGTCTCCAGAATATTCAAGGGCATTTTATTTTATTTTATTTTATTTATTTATTTTTTTGAGATGGAGTCTTGCTCTGTAGCCCGGGCTGGAGTGCAGTGGCCGGATCTCAGCTCACTGCAAGCTCCGCCCCCCGGGTTTACGCCATTCTCCTGCCTCAGCCTCCG…	CTTATACCTATGATAAAATTAACTAAAACATAGACATAAGAAAAAGGCATATCTCAATTATACTAAAAATCTGAAATCTGGAGCTTCAACCCAAGCATGTGTGTTTTTTAAAATGCCCTTGGCCGGGCGCGGTGGCTCAAGCCTGTAATCCCATGCAAAGCTT	CTTATACCTATGATAAAATTAACTAAAACATAGACATAAGAAAAAGGCATATCTCAATTATACTAAAAATCTGAAATCTGGAGCTTCAACCCAAGCATGTGTGTTTTTTAAAATGCCCTTGGCCGGGCGCGGTGGCTCAAGCCTGTAATCCCATGCAAAGCTT
23cf7a0c-1824-46d3-ac6b-2f98428a1b34	Chr1	1785700	1785688	ALU	Alu_YRd4	0	270	+	+	N	AAGTTATGTAGTC	Hippocampus.Single.WGS.ON22213.Neuron-#52|1,Liver.Bulk.WGS.ON22213|13	Hippocampus.Single.WGS.ON22213.Neuron-#69|3,Hippocampus.Single.WGS.ON22213.Neuron-#39|1,Hippocampus.Single.WGS.ON22213.Neuron-#52|4,Liver.Bulk.WGS.ON22213|12,Hippocampus.Single.RC-seq.ON22213.Neuron-#69|1,Hippocampus.Single.RC-seq.ON22213.Neuron-#39|1,Hippocampus.Single.RC-seq.ON22213.Neuron-#52|2	CTGAGACTACAGGCGCCTGCCACCTCGCCCGGCTAATTTTTTGTATTTTTAGTAGAGACGGGGTTTCACCGTGTTAGCCAGGATAGTCTCGATCTCCTGACCTCGTGATCCACCCGCCTCGGCCTCCCAAAGTGCTGGGATTACAGGCTTGAGCCACCGCGCCCGGCCGACTACATAACTTATAAAGAGTTTTATTGGGATTGTTTTGAATATATAATTCAAATTGGGGCAAACCAACATCTTAACAATATTGAGGTTTCTTTTCCATGACATGGAACATCTCTCCATTTATTTAAATCTTTGATTTTTTCATTAGAAACTTGTAGTTTTTGTCATGAAGATCTTTGTCATATATATATGTGTATATATATATATTTTGTCTATTTTCTTGTGCTATAA…	GGGCGAGGTGGCAGGCGCCTGTAGTCTCAGCTACTTGGGAGGCTGAGGCGGGAGAATGGCGTGAACCCGGGAGGCGGAGCTTGCAGTGAGCCGAGATCGCGCCACTGCACTCCAGCCTGGGAGACACAGCGAGACTCCGTCTCAAAAAAAAAAAAAAAGTTATGTAGTCAATAATGAAAAATTGACCCTGAAAATTATATGGAAAAGCAAATGATCCAGAATGGTTAACAGAACAAGGAAGAGTAAATTTCCAGTACTCACACTACATGACTTTAAGATTCATTATAAAATTATAGTAATCAAGACAGTGTGGTATTTGGGAAAGAATAGACAAATAGGTCAATAGAACAGAATAGAAAATTCAGAAATAAACCCACAAAATACAGTCAACTGATCTCT…	ATGTTCCATGTCATGGAAAAGAAACCTCAATATTGTTAAGATGTTGGTTTGCCCCAATTTGAATTATATATTCAAAACAATCCCAATAAAACTCTTTATAAGTTATGTAGTCGGCCGGGCGCGGTGGCTCAAGCCTGTAATCCCAGCACTTTGGGAGGCCGAGGCGGGTGGATCACGAGGTCAGGAGATCGAGACTATCCTGGCTAACACGGTGAAACCCCGTCTCTACTAAAAATACAAAAAATTAGCCGGGCGAGGTGGCAGGCGGCCTGTAGTCTCAGCTACTTGGGAGGCTGAGGCGGGAGAATGGCGTGAACCCGGGAGGCGGAGCTTGCAGTGAGCCGAGATCGCGCCACTGCACTCCAGCCTGGGAGACACAGCGAGACTCCGGTCTCAAAA…	ATGTTCCATGTCATGGAAAAGAAACCTCAATATTGTTAAGATGTTGGTTTGCCCCAATTTGAATTATATATTCAAAACAATCCCAATAAAACTCTTTATAAGTTATGTAGTCGGCCGGGCGCGGTGGCTCAAGCCTGTAATCCCAGCACTTTGGGAGGCCGAGGCGGGTGGATCACGAGGTCAGGAGATCGAGACTATCCTGGCTAACACGGTGAAACCCCGTCTCTACTAAAAATACAAAAAATTAGCCGGGCGAGGTGGCAGGCGGCCTGTAGTCTCAGCTACTTGGGAGGCTGAGGCGGGAGAATGGCGTGAACCCGGGAGGCGGAGCTTGCAGTGAGCCGAGATCGCGCCACTGCACTCCAGCCTGGGAGACACAGCGAGACTCCGGTCTCAAAA…
77d49264-ea95-4cff-839f-ab34551df09a	Chr1	1812281	1812268	ALU	Alu_YRd4	0	270	-	-	N	TGGCAGCTGTTTTT	Liver.Bulk.WGS.ON22212|16	Liver.Bulk.WGS.ON22212|19	CTGTCACATTTTCATTCATATTAGGTAACATTAAGGTCATTATAGAAATTAACTTTTTGGTGTCCCACAACTAAATGAACATAAATAATGTTTACTTTGTTAGTAAGTTATACTAATTAGGCATAGGAAGAAATGGCAGCTGTTTTTTTTTTTTTTTTGAGACGGAGTCTAGCTGTGTCTCCCAGGCTGGGGAAGTGCAGTGGCGTGATCTCGGCTCCACTGCAAGCTCCGCCTCCTGGGTTCACGCCATTCTGCCGCCTCAGCCTCCCA	GTGGTGAGATAGTACTTGCTGGTAACATTTTAGTCAATAATTTCTATTGTTATTTACAATGTTCAGAAAATATGACCTGCTGGGTTTCTGGGATAATAAATTCAATGACATATTTTAGGCCTAAAACTTTACCACCTAAAATACTCATATCTAATATTTTAAAATAATGGGCATCCTTTGTTTACTGGCAAAAACAGCTGCCAGGCCGGGCGCGGTGGCTCAAGCCTGTAATCCCAGCACTTTGGGAGGCCGAGGCGGGTGGATCACGAGGTCAGGAGATCGAGACCATCCTGGATAACATGGTGAAACCCCGTCTCTACTAAAAATACAAAAAACTAGCCGGGCGTGGTGGCGGGCGCCTGTAGTCTCAGCTACTTGGGAGGCTGAGGCGGCAGAATG…	CTTTGTTTACTGGCAAAAACAGCTGCCAGGCCGGGCGCGGTGGCTCAAGCCTGTAATCCCAGCACTTTGGGAGGCCGAGGCGGGTGGATCACGAGGTCAGGAGATCGAGACCATCCTGGATAACATGGTGAAACCCCGTCTCTACTAAAAATACAAAAAACTAGCCGGGCGTGGTGGCGGGCGCCTGTAGTCTCAGCTACTTGGGAGGCTGAGGCGGCAGAATGGCGTGAACCCAGGAGGCGGAGCTTGCAGTGAGCCGAGATCACGCCACTGCACTCCAGCCTGGGAGACACAGCGAGACTCCGTCTCAAAAAAAAAAAAAAAACAAGCACAAAAAAACAGCTGCCATTTCTTCCTATGCCTAATTAGTATAACTTACTAACAAAGTAAACATTATTT…	CTTTGTTTACTGGCAAAAACAGCTGCCAGGCCGGGCGCGGTGGCTCAAGCCTGTAATCCCAGCACTTTGGGAGGCCGAGGCGGGTGGATCACGAGGTCAGGAGATCGAGACCATCCTGGATAACATGGTGAAACCCCGTCTCTACTAAAAATACAAAAAACTAGCCGGGCGTGGTGGCGGGCGCCTGTAGTCTCAGCTACTTGGGAGGCTGAGGCGGCAGAATGGCGTGAACCCAGGAGGCGGAGCTTGCAGTGAGCCGAGATCACGCCACTGCACTCCAGCCTGGGAGACACAGCGAGACTCCGTCTCAAAAAAAAAAAAAAAACAAGCACAAAAAAACAGCTGCCATTTCTTCCTATGCCTAATTAGTATAACTTACTAACAAAGTAAACATTATTT…
ef2e0c69-0d65-4eec-9502-31c9ae04e63f	Chr1	1864788	1864777	ALU	Alu_YRa4	0	269	+	+	N	AAAGGTTGGTGA	Hippocampus.Single.WGS.ON22212.Neuron-#16|6,Hippocampus.Single.WGS.ON22212.Neuron-#19|5,Hippocampus.Single.WGS.ON22212.Neuron-#21|2,Hippocampus.Single.WGS.ON22212.Neuron-#37|24,Liver.Bulk.WGS.ON22212|15,Hippocampus.Single.RC-seq.ON22212.Neuron-#16|4,Hippocampus.Single.RC-seq.ON22212.Neuron-#21|2,Hippocampus.Single.RC-seq.ON22212.Neuron-#37|1	Hippocampus.Single.WGS.ON22212.Neuron-#16|6,Hippocampus.Single.WGS.ON22212.Neuron-#19|4,Hippocampus.Single.WGS.ON22212.Neuron-#21|4,Hippocampus.Single.WGS.ON22212.Neuron-#37|25,Liver.Bulk.WGS.ON22212|11,Hippocampus.Single.RC-seq.ON22212.Neuron-#16|1,Hippocampus.Single.RC-seq.ON22212.Neuron-#19|1,Hippocampus.Single.RC-seq.ON22212.Neuron-#21|1	GAATAGGATCAATAAGCATTTAATATACCTTGTCTTAGATTCTATGTAAGAAAATGAAAAGTAAATAACAATGGCATGGCGATTTCATCAAACTGAACAAATAGAAGCATTTCTCCAGAGAGAATATGCTATTAAAGGTTGGTGAGGCCGGGCGCGGTGGCGTCTCAAGCCTGTAATCCCAGCACTTTGGGAGGCCGAGACGGGCGGATCACGAGGTCAGGAGATCGAGACCATCCTGGCTAACACGGTGAAACCCCATCTCTACTAAAT	AGCTACTTGGTTGGCTGTGGCTGCTTAATGGCGTAAACCCGGGTGGCGTAGGTGGCTGTGCGCTGCTACCCGGCCACTGCACTCCTGCTTGGGCGACAGCGCAAGAATCAGTATAAAAAAAAAAAAAAAAAAAAGGTTGGTGAATATCAGTCTTCTGAGGACTTGGCCTGGGAGAGTGAAAAGCTACAGCCTTTTCTGAGTTCCAGTGGGGAGGATATAAATATATATTCATTTTGATACTCTTTTTAATATACAAACATATAAATGAATTGAGAT	TCTTAGATTCTATGTAAGAAAATGAAAAGTAAATAACAATGGCATGGCGATTTCATCAAACTGAACAAATAGAAGCATTTCTCCAGAGAGAATATGCTATTAAAGGTTGGTGAGGCCGGGCGCGGTGGCTCAAGCCTGTAATCCCAGCACTTTGGGAGGCCGAGACGGGCGGATCACGAGGTCAGGAGATCGAGACCATCCTGGCTAACACGGTGAAACCCCATCTCTACTAAATAAATACAAAAAAACTAGCCGGGCGCGGTGGCGGGCGCCTGTGGTCCCAGCTACTTGGGAGGCTGAGGCAGCAGAATGGCGTAAACCCGGGAGGCGGAGCTTGCAGTGAGCTGAGATCCGGCCACTGCACTCCAGCCTGGGCGACAGAGCCAGACTCAGTCTCAA…	TCTTAGATTCTATGTAAGAAAATGAAAAGTAAATAACAATGGCATGGCGATTTCATCAAACTGAACAAATAGAAGCATTTCTCCAGAGAGAATATGCTATTAAAGGTTGGTGAGGCCGGGCGCGGTGGCTCAAGCCTGTAATCCCAGCACTTTGGGAGGCCGAGACGGGCGGATCACGAGGTCAGGAGATCGAGACCATCCTGGCTAACACGGTGAAACCCCATCTCTACTAAATAAATACAAAAAAACTAGCCGGGCGCGGTGGCGGGCGCCTGTGGTCCCAGCTACTTGGGAGGCTGAGGCAGCAGAATGGCGTAAACCCGGGAGGCGGAGCTTGCAGTGAGCTGAGATCCGGCCACTGCACTCCAGCCTGGGCGACAGAGCCAGACTCAGTCTCAA…
eecfcc2c-15ce-4c03-a226-6970f173b75b	Chr1	2239529	2239517	ALU	Alu_YRb4	0	258	+	+	N	TAAAATCAGGACT	Hippocampus.Single.WGS.ON22213.Neuron-#14|10,Hippocampus.Single.WGS.ON22213.Neuron-#39|11,Hippocampus.Single.WGS.ON22213.Neuron-#47|1,Hippocampus.Single.WGS.ON22213.Neuron-#49|2,Liver.Bulk.WGS.ON22213|15,Hippocampus.Single.RC-seq.ON22213.Neuron-#14|1,Hippocampus.Single.RC-seq.ON22213.Neuron-#38|2,Hippocampus.Single.RC-seq.ON22213.Neuron-#39|7	Hippocampus.Single.WGS.ON22213.Neuron-#14|8,Hippocampus.Single.WGS.ON22213.Neuron-#38|1,Hippocampus.Single.WGS.ON22213.Neuron-#39|18,Hippocampus.Single.WGS.ON22213.Neuron-#49|2,Liver.Bulk.WGS.ON22213|19,Hippocampus.Single.RC-seq.ON22213.Neuron-#14|1	TTCCCCGGCAAGGCTGGAAATCAGTGTGACTGTGTTTCTTCAGCCTGGAGAGTAGCTGCACCCGTGTTATCTCAGCAAAGGCTCTGGAATCTCATTATCAAATGTTCGCCAAGTGGGCACAGCGTGGAATGTGTTAAAATCAGGACTGGCCGGGCGCGGTGGCTCAAGCCTGTAATCCCAGCACTTTGGGAGGCCGAGGCGGGCGGATCACAAGGTCAGGAGATCGAGACTACAGTGAAACCGCCCCC	AGCCGAGATCGCGCCACTGCACTCCAGCCTGGGCAACAGCGTGAGACTCCGTCTAAAAAAAAAATAAAAAAAATAAAAAAAATAAAAAAAATAAATAAAAAAAAATAAAAAAAAATAAAATAAAATCAGGACTCTGCTCTTCAGCTTCAGCTGCAGGGAGGGACAAAATGTGGTGAACTCTGCCCCCAGCCCGGTGCTGGCCTCACCCAC	TGGAGAGTAGCTGCACCCGTGTTATCTCAGCAAAGGCTCTGGAATCTCATTATCAAATGTTCGCCAAGTGGGCACAGCGTGGAATGTGTTAAAATCAGGACTGGCCGGGCGCGGTGGCTCAAGCCTGTAATCCCAGCACTTTGGGAGGCCGAGGCGGGCGGATCACAAGGTCAGGAGATCGAGACTACAGTGAAACCCCGTCTCTACTAAAAATACAAAAAATTAGCCGGGCGCGGTGGCGGGCGCCTGTAGTCCCAGCTACTCAGGAGGCTGAGGCAGGAGAATGGCGGGAACCCGGGAGGCGGAGCTTGCAGTGAGCCGAGATCGCGCCACTGCACTCCAGCCTGGGCAACAGCGTGAGACTCCGTCTAAAAAAAAAATAAAAAAAATAAAAAAAAT…	TGGAGAGTAGCTGCACCCGTGTTATCTCAGCAAAGGCTCTGGAATCTCATTATCAAATGTTCGCCAAGTGGGCACAGCGTGGAATGTGTTAAAATCAGGACTGGCCGGGCGCGGTGGCTCAAGCCTGTAATCCCAGCACTTTGGGAGGCCGAGGCGGGCGGATCACAAGGTCAGGAGATCGAGACTACAGTGAAACCCCGTCTCTACTAAAAATACAAAAAATTAGCCGGGCGCGGTGGCGGGCGCCTGTAGTCCCAGCTACTCAGGAGGCTGAGGCAGGAGAATGGCGGGAACCCGGGAGGCGGAGCTTGCAGTGAGCCGAGATCGCGCCACTGCACTCCAGCCTGGGCAACAGCGTGAGACTCCGTCTAAAAAAAAAATAAAAAAAATAAAAAAAAT…
82cbdf71-ec79-441b-b6ea-f76b5f1a8db2	Chr1	2279474	2279462	ALU	Alu_YRa4	0	269	+	+	N	AAGAATCACTGCC	Hippocampus.Single.WGS.ON22213.Neuron-#14|15,Hippocampus.Single.WGS.ON22213.Neuron-#38|1,Hippocampus.Single.WGS.ON22213.Neuron-#39|1,Liver.Bulk.WGS.ON22213|11,Hippocampus.Single.RC-seq.ON22213.Neuron-#14|1,Hippocampus.Single.RC-seq.ON22213.Neuron-#23|1	Hippocampus.Single.WGS.ON22213.Neuron-#14|14,Hippocampus.Single.WGS.ON22213.Neuron-#38|2,Hippocampus.Single.WGS.ON22213.Neuron-#39|2,Liver.Bulk.WGS.ON22213|5,Hippocampus.Single.RC-seq.ON22213.Neuron-#14|4,Hippocampus.Single.RC-seq.ON22213.Neuron-#15|1,Hippocampus.Single.RC-seq.ON22213.Neuron-#31|1,Hippocampus.Single.RC-seq.ON22213.Neuron-#39|1	AATCTCAGTTAAGAATCACTGCCAAAGCAGTGGGTCAGGATGGCCATGATTCTGATACATGAAATCTCAGTTGAGAATCACTGATAAAGCAGTGGGTCAGGACGGCCATGGTTCTGATATATGAAATCTCAGTTAAGAATCACTGCCGGCCGGGCGCGGTGGCTCAAGCCTGTAATCCCAGCACTGTGGGAGGCCGAGATGGGCGGATCACGAGGTCAGGAGATCGAGACCATCCTGGCTAACACGGTGAAACCCCGT	GGGTTGGCTTGGGATGTTTATGGGGTTTACCCATGGTGGGGTTGTTTCATTTGTGGTTTTATCGGGCAATTTAATTCATCCCTGGGCGCATCACCTTCATCCGTCATAAAAAAAAAAAAAAAAAAAAAAGAATCACTGCCAAAGCAGTGGGTCAGGACGGCCATGATTCTGATACATGAAGTCTCAGTTGAGAATCACTGATACAGCAGTGGGTCAGGACGGCCATGATTCTGATACATGAAGACTCAGTTGAGAAACACTGATACAGCAGTGGG	GATTCTGATACATGAAATCTCAGTTGAGAATCACTGATAAAGCAGTGGGTCAGGACGGCCATGGTTCTGATATATGAAATCTCAGTTAAGAATCACTGCCGGCCGGGCGCGGTGGCTCAAGCCTGTAATCCCAGCACTGTGGGAGGCCGAGATGGGCGGATCATGAGGTCAGGAGATCGAGACCATCCTGGCTAACACGGTGAAACCCCGTCTCTACTAAAAAATACAAAAAACTAGCCGGGCGCAGTGGCGGGCGCCTGTAGTCCCAGCTACTCGGGAGGCTGAGGCAGGAGAATGGCGTGAACCCAGGAGGCGGAGCTTGCAGTGAGCTGAGATCCGGCCACTGCACTCCAGCCTGGGCGGCAGAGCGAGACTCCGTCTCAAAAAAAAAAAAAAAAA…	GATTCTGATACATGAAATCTCAGTTGAGAATCACTGATAAAGCAGTGGGTCAGGACGGCCATGGTTCTGATATATGAAATCTCAGTTAAGAATCACTGCCGGCCGGGCGCGGTGGCTCAAGCCTGTAATCCCAGCACTGTGGGAGGCCGAGATGGGCGGATCATGAGGTCAGGAGATCGAGACCATCCTGGCTAACACGGTGAAACCCCGTCTCTACTAAAAAATACAAAAAACTAGCCGGGCGCAGTGGCGGGCGCCTGTAGTCCCAGCTACTCGGGAGGCTGAGGCAGGAGAATGGCGTGAACCCAGGAGGCGGAGCTTGCAGTGAGCTGAGATCCGGCCACTGCACTCCAGCCTGGGCGGCAGAGCGAGACTCCGTCTCAAAAAAAAAAAAAAAAA…
74a3943d-55d2-49e9-97ff-34766a709f3d	Chr1	2975002	2975003	ALU	Alu_YRd4	0	270	-	-	N	AT	Hippocampus.Single.WGS.ON22212.Neuron-#17|23,Hippocampus.Single.WGS.ON22212.Neuron-#19|4,Hippocampus.Single.WGS.ON22212.Neuron-#21|1,Hippocampus.Single.WGS.ON22212.Neuron-#7|11,Liver.Bulk.WGS.ON22212|13,Hippocampus.Single.RC-seq.ON22212.Neuron-#17|4,Hippocampus.Single.RC-seq.ON22212.Neuron-#19|5,Hippocampus.Single.RC-seq.ON22212.Neuron-#7|3	Hippocampus.Single.WGS.ON22212.Neuron-#17|19,Hippocampus.Single.WGS.ON22212.Neuron-#19|3,Hippocampus.Single.WGS.ON22212.Neuron-#7|3,Liver.Bulk.WGS.ON22212|22,Hippocampus.Single.RC-seq.ON22212.Neuron-#17|6,Hippocampus.Single.RC-seq.ON22212.Neuron-#19|2	AGACACGTGCAACAACCGCCAAATGACCTGTCCATCTTATCAAAGACAACGAAATGATGATTCCCTGCTAGTGTCTAGATATTATTTATCCAAGTCGTTGATTTGTAGGTGTTCATTCCATTTTCTCATACACAATCCAGTAATCCATAATCCAGTAAAAGACTCACAACATAGACATTCAATTTACAGTTGTTGCACAGGGTCTATTAAAAATTCTTTCATGGCCGGGCGCGGTGGCTCAAGCCTGTAATCCCAGCACTTTGGGAGGCCGAGGCGGGTGGATCACGAGGTCAGGAGATCGAGACTATCCTGGCTAACATGGTGAAACCCCGTCTCTACTAAAAATACAAAAAACTAGCCGGGCATGGTGGCGGGCGCCTGTAGTCTCAGCTACTTGGG…	AGACACGTGCAACAACCGCCAAATGACCTGTCCATCTTATCAAAGACAACGAAATGATGATTCCCTGCTAGTGTCTAGATATTATTTATCCAAGTCGTTGATTTGTAGGTGTTCATTCCATTTTCTCATACACAATCCAGTAATCCATAATCCAGTAAAAGACTCACAACATAGACATTCAATTTACAGTTGTTGCACAGGGTCTATTAAAAATTCTTTCATGGCCGGGCGCGGTGGCTCAAGCCTGTAATCCCAGCACTTTGGGAGGCCGAGGCGGGTGGATCACGAGGTCAGGAGATCGAGACTATCCTGGCTAACATGGTGAAACCCCGTCTCTACTAAAAATACAAAAAACTAGCCGGGCATGGTGGCGGGCGCCTGTAGTCTCAGCTACTTGGG…	AGGGTCTATTAAAAATTCTTTCATGGCCGGGCGCGGTGGCTCAAGCCTGTAATCCCAGCACTTTGGGAGGCCGAGGCGGGTGGATCACGAGGTCAGGAGATCGAGACTATCCTGGCTAACATGGTGAAACCCCGTCTCTACTAAAAATACAAAAAACTAGCCGGGCATGGTGGCGGGCGCCTGTAGTCTCAGCTACTTGGGAGGCTGAGGCGGGAGAATGGCGTAAACCCGGGAGGCGGAGCGTGCAGGGTGAGCTGAGATCACGCCACTGCACTCCAGCCTGGGAGACACAGCGAGACTCCGTCTCAAAAAAAAAAAAAAAAAAATTATTTAAATTACAAAGTATTTATTTCCTGGTTTCTTAAATATTCGGAAAATGCATAAAACACATGAAAAATA…	AGGGTCTATTAAAAATTCTTTCATGGCCGGGCGCGGTGGCTCAAGCCTGTAATCCCAGCACTTTGGGAGGCCGAGGCGGGTGGATCACGAGGTCAGGAGATCGAGACTATCCTGGCTAACATGGTGAAACCCCGTCTCTACTAAAAATACAAAAAACTAGCCGGGCATGGTGGCGGGCGCCTGTAGTCTCAGCTACTTGGGAGGCTGAGGCGGGAGAATGGCGTAAACCCGGGAGGCGGAGCGTGCAGGGTGAGCTGAGATCACGCCACTGCACTCCAGCCTGGGAGACACAGCGAGACTCCGTCTCAAAAAAAAAAAAAAAAAAATTATTTAAATTACAAAGTATTTATTTCCTGGTTTCTTAAATATTCGGAAAATGCATAAAACACATGAAAAATA…
597c4426-6b24-4b4e-9566-56857f2f1b75	Chr1	4088258	4088274	ALU	Alu_YRa4	0	270	-	-	N	GCCTCTACTGTATTTCT	Hippocampus.Single.WGS.ON22212.Neuron-#16|3,Hippocampus.Single.WGS.ON22212.Neuron-#19|2,Liver.Bulk.WGS.ON22212|19,Liver.Bulk.WGS.ON22213|15,Hippocampus.Single.RC-seq.ON22212.Neuron-#16|2,Hippocampus.Single.RC-seq.ON22213.Neuron-#52|1,Hippocampus.Single.RC-seq.ON22213.Neuron-#47|1	Hippocampus.Single.WGS.ON22212.Neuron-#16|2,Hippocampus.Single.WGS.ON22213.Neuron-#47|2,Liver.Bulk.WGS.ON22212|15,Liver.Bulk.WGS.ON22213|7,Hippocampus.Single.RC-seq.ON22212.Neuron-#16|2,Hippocampus.Single.RC-seq.ON22213.Neuron-#69|1,Hippocampus.Single.RC-seq.ON22213.Neuron-#52|1	GCTCCATAAACATGTACAATTATTATGTGTCAATTAAAAAATACTTAAGATTATTGTTTAAAAGAAAACTAGGAATAGAAGGGAACTTCCTCATTACGATAAAAGGTACTTATGAAAAACTCACAACTAACATCATACTTAATGAATGGCAAAAGCTATTCTGCGTGCCTTTAGAATCAGCATGTTTTAGAAAGGAAATGTCTATTTTATATTAATCTGGCACACACATTAAGGGGAGCCTCTACTGTATTTCTTTTTTTTTTTTTTTTTTTTTTTTTGAGGCGGAGTCTCACGCTGTTGCCCAGGCTGGAGTGCAGTGGCGCGATCTCGGCTCACTGCAAGCTCCGCCTCCCGGGTTCCCGCCATTCTCCTGCCTCAGCCTCCCGAGTAGCTGGGACT…	GCTCCATAAACATGTACAATTATTATGTGTCAATTAAAAAATACTTAAGATTATTGTTTAAAAGAAAACTAGGAATAGAAGGGAACTTCCTCATTACGATAAAAGGTACTTATGAAAAACTCACAACTAACATCATACTTAATGAATGGCAAAAGCTATTCTGCGTGCCTTTAGAATCAGCATGTTTTAGAAAGGAAATGTCTATTTTATATTAATCTGGCACACACATTAAGGGGAGCCTCTACTGTATTTCTTTTTTTTTTTTTTTTTTTTTTTTTGAGGCGGAGTCTCACGCTGTTGCCCAGGCTGGAGTGCAGTGGCGCGATCTCGGCTCACTGCAAGCTCCGCCTCCCGGGTTCCCGCCATTCTCCTGCCTCAGCCTCCCGAGTAGCTGGGACT…	AGAAATACAGTAGAGGCGGCCGGGCGCGGTGGCTCAAGCCTGTAATCCCAGCACTTTGGGAGGCCGAGGCGGGCGGATCACAAGGTCAGGAGATCGAGACCACAGTGAAACCCTGTCTCTACTAAAAATACAAAAAATTAGCCGGGCGCGGTGGCGGGCGCCTGTAGTCCCAGCTACTCGGGAGGCTGAGGCAGGAGAATGGCGGGAACCCGGGAGGCGGAGCTTGACGTGAGGCGAGATCGCGCCACCGCACTCCCGCCTGGGCAACAGCGTGAGACTCTGCCTCAAAAAAAAAAAAAAAAAAAAAAAAAAAAAAAAAAAGAAAGAGGCCCCATTAAATTTTTTTTAT	AGAAATACAGTAGAGGCGGCCGGGCGCGGTGGCTCAAGCCTGTAATCCCAGCACTTTGGGAGGCCGAGGCGGGCGGATCACAAGGTCAGGAGATCGAGACCACAGTGAAACCCTGTCTCTACTAAAAATACAAAAAATTAGCCGGGCGCGGTGGCGGGCGCCTGTAGTCCCAGCTACTCGGGAGGCTGAGGCAGGAGAATGGCGGGAACCCGGGAGGCGGAGCTTGACGTGAGGCGAGATCGCGCCACCGCACTCCCGCCTGGGCAACAGCGTGAGACTCTGCCTCAAAAAAAAAAAAAAAAAAAAAAAAAAAAAAAAAAAGAAAGAGGCCCCATTAAATTTTTTTTAT
1a02e271-a12a-40a5-98f3-b79f249c3042	Chr1	4961265	4961278	ALU	Alu_YRa4	0	269	-	-	N	AAGACGTATAATTT	Hippocampus.Single.WGS.ON22213.Neuron-#14|36,Hippocampus.Single.WGS.ON22213.Neuron-#15|9,Hippocampus.Single.WGS.ON22213.Neuron-#71|2,Hippocampus.Single.WGS.ON22213.Neuron-#38|1,Hippocampus.Single.WGS.ON22213.Neuron-#39|1,Hippocampus.Single.WGS.ON22213.Neuron-#52|1,Liver.Bulk.WGS.ON22213|8,Hippocampus.Single.RC-seq.ON22213.Neuron-#14|12,Hippocampus.Single.RC-seq.ON22213.Neuron-#15|6,Hippocampus.Si…	Hippocampus.Single.WGS.ON22213.Neuron-#14|45,Hippocampus.Single.WGS.ON22213.Neuron-#15|9,Hippocampus.Single.WGS.ON22213.Neuron-#71|2,Hippocampus.Single.WGS.ON22213.Neuron-#38|2,Hippocampus.Single.WGS.ON22213.Neuron-#52|9,Liver.Bulk.WGS.ON22213|18,Hippocampus.Single.RC-seq.ON22213.Neuron-#14|14,Hippocampus.Single.RC-seq.ON22213.Neuron-#15|3,Hippocampus.Single.RC-seq.ON22213.Neuron-#71|1,Hippocampu…	TTAGTAGAGACGGGGTTTCACCGTGTTAGCCAGGATGGTCTCGATCTCCTGACCTCGTGATCCGCCCGTCTCGGCCTCCCAAAGTGCTGGGATTACAGGCTTGAGCCACCGCGCCCAGCCAAGACGTATAATTTCTATTGGTAAAGCTGCTTATTTTTAATTTCTGTAATAAAAAATGAACATGTATTCATCTCTGATGTGCTATTATAACTACCACAGAATGCACAATGGAGGGTAAAGCATGACAAACTGATAATTCATTCAAAA	GGAGATGGAGGTTGCAGTGAGCCGAGATCGCGCCACTGCACTCCAGCCTGAGCGACAGAGTGAGACTTTGTCTCAAAAACAAAAACAAAACCAAAAAACAAATAGTGAATTTTCTTATTGATGACACCACCTGAAAGACGTATAATTTTTTTTTTTTTTTTTTTTTTTGTGAGCGGTGTGTGGCTCTGTCACCCAGGCTGGAGTGCAGTGGCGCGGTATCTCGGCTCACTGCAAGCTCACGCCCGCGCCCGGGTTTACGCCATTCACCTGCCACTTA	GCTTTACCAATAGAAATTATACGTCTTGGCTGGGCGCGGTGGCTCAAGCCTGTAATCCCAGCACTTTGGGAGGCCGAGACGGGCGGATCACGAGGTCAGGAGATCGAGACCATCCTGGCTAACACGGTGAAACCCCGTCTCTACTAAAAAATACAAAAAACTAGCCGGGCGAGGTGGCGGGCGCCTGTAGTCCCAGCTACTCGGGAGCCTGAGGCAGGAGAATGGCGTAAACCCGGGAGGCGGAGCTTGCAGTGAGCCGAGATCGCGCCACTGCACTCCAGCCTGGGTGACAGAGCCAGACTCCGTCTCAAAAAAAAAAAAAAAAAAAAATAATTATACGTCTTTCAGGTGGTGTCATCAATAAGAAAAGTCACTATTTGTTTTTTGGTTTTGTTTTTG…	GCTTTACCAATAGAAATTATACGTCTTGGCTGGGCGCGGTGGCTCAAGCCTGTAATCCCAGCACTTTGGGAGGCCGAGACGGGCGGATCACGAGGTCAGGAGATCGAGACCATCCTGGCTAACACGGTGAAACCCCGTCTCTACTAAAAAATACAAAAAACTAGCCGGGCGAGGTGGCGGGCGCCTGTAGTCCCAGCTACTCGGGAGCCTGAGGCAGGAGAATGGCGTAAACCCGGGAGGCGGAGCTTGCAGTGAGCCGAGATCGCGCCACTGCACTCCAGCCTGGGTGACAGAGCCAGACTCCGTCTCAAAAAAAAAAAAAAAAAAAAATAATTATACGTCTTTCAGGTGGTGTCATCAATAAGAAAAGTCACTATTTGTTTTTTGGTTTTGTTTTTG…
8072e352-ba6a-401f-8367-88859377f5f3	Chr1	6589877	6589893	ALU	Alu_YRb4	0	258	+	+	N	AAAAAGAGATCATAAGT	Hippocampus.Single.WGS.ON22212.Neuron-#10|9,Hippocampus.Single.WGS.ON22212.Neuron-#16|1,Hippocampus.Single.WGS.ON22212.Neuron-#7|1,Hippocampus.Single.WGS.ON22213.Neuron-#14|9,Hippocampus.Single.WGS.ON22213.Neuron-#15|20,Hippocampus.Single.WGS.ON22213.Neuron-#23|13,Hippocampus.Single.WGS.ON22213.Neuron-#25|10,Liver.Bulk.WGS.ON22212|11,Liver.Bulk.WGS.ON22213|6,Hippocampus.Single.RC-seq.ON22212.Neur…	Hippocampus.Single.WGS.ON22212.Neuron-#10|29,Hippocampus.Single.WGS.ON22212.Neuron-#7|1,Hippocampus.Single.WGS.ON22213.Neuron-#14|12,Hippocampus.Single.WGS.ON22213.Neuron-#15|28,Hippocampus.Single.WGS.ON22213.Neuron-#23|21,Hippocampus.Single.WGS.ON22213.Neuron-#25|7,Hippocampus.Single.WGS.ON22213.Neuron-#52|1,Liver.Bulk.WGS.ON22212|14,Liver.Bulk.WGS.ON22213|10,Hippocampus.Single.RC-seq.ON22212.Ne…	ATTGGCGTGAACCGGGGGGGGGGTGCTGGCCGTTGCCCGAGAACGCGCCACTCAAAACCCCCCTGGGCCCCACCCGTAGACACCGCAAAAAAAAAAAAAAAAAAAAAAAAAAAAAAAAAAAAAAAGAGATCATAAGTCTTTATAGTTCATCCCCTAGGGTT	GTTTTGGTCATTCCAGCCAAGGTTCTGGATATGTGAGTGAAAAGGCCTGTAGATGATTCCTGTAGTTAGCCCTTCCAGTCACTCCCAGCAACTTAAGTCTTCCCAAATGGAGGAAATAGACATACTTAAGCAAATATAAGCCATCCCTCCTGGGCCCTGCCCAAATTCCTGCCCTGCACAATCCATGAACACAACAAAATAGTTTGCTTTATGCCACCAAGTTTTGGGGTGGTTTGACAGCTATAGGTAACTGGAACACTCCCTTAAAAAGAGATCATAAGTTGGCCGGGCGCGGTGGCTCACGCCTGTAATCCCAGCACTTTGGGAGGCCGAGGCGGGCGGATCACAAGGTCAGGAGATCGAGACCACGGTGAAACCCCGTCTCTACTAAAAATACAA…	CCTGCACAATCCATGAACACAACAAAATAGTTTGCTTTATGCCACCAAGTTTTGGGGTGGTTTGACAGCTATAGGTAACTGGAACACTCCCTTAAAAAGAGATCATAAGTTGGCCGGGCGCGGTGGCTCACGCCTGTAATCCCAGCACTTTGGGAGGCCGAGGCGGGCGGATCACAAGGTCAGGAGATCGAGACCACGGTGAAACCCCGTCTCTACTAAAAATACAAAAAATTAGCCGGGCGCGGTTGTGGGCGCCTGTAGTCCCAGCTACTCGGGAGGCTGAGGCAGGAGAATGGCGTGAACGCCAC	CCTGCACAATCCATGAACACAACAAAATAGTTTGCTTTATGCCACCAAGTTTTGGGGTGGTTTGACAGCTATAGGTAACTGGAACACTCCCTTAAAAAGAGATCATAAGTTGGCCGGGCGCGGTGGCTCACGCCTGTAATCCCAGCACTTTGGGAGGCCGAGGCGGGCGGATCACAAGGTCAGGAGATCGAGACCACGGTGAAACCCCGTCTCTACTAAAAATACAAAAAATTAGCCGGGCGCGGTTGTGGGCGCCTGTAGTCCCAGCTACTCGGGAGGCTGAGGCAGGAGAATGGCGTGAACGCCAC
9c06473a-e223-4126-87e2-2abb38622c14	Chr1	6989436	6989421	ALU	Alu_YRc2	1	270	+	+	N	AAAAAAATAGTCACGA	Hippocampus.Single.WGS.ON22212.Neuron-#16|1,Hippocampus.Single.WGS.ON22212.Neuron-#19|14,Hippocampus.Single.WGS.ON22212.Neuron-#21|32,Hippocampus.Single.WGS.ON22212.Neuron-#7|3,Liver.Bulk.WGS.ON22212|16,Hippocampus.Single.RC-seq.ON22212.Neuron-#19|4,Hippocampus.Single.RC-seq.ON22212.Neuron-#21|7,Hippocampus.Single.RC-seq.ON22212.Neuron-#7|2	Hippocampus.Single.WGS.ON22212.Neuron-#16|2,Hippocampus.Single.WGS.ON22212.Neuron-#19|10,Hippocampus.Single.WGS.ON22212.Neuron-#21|24,Hippocampus.Single.WGS.ON22212.Neuron-#7|4,Liver.Bulk.WGS.ON22212|12,Hippocampus.Single.RC-seq.ON22212.Neuron-#16|1,Hippocampus.Single.RC-seq.ON22212.Neuron-#19|5,Hippocampus.Single.RC-seq.ON22212.Neuron-#21|6,Hippocampus.Single.RC-seq.ON22212.Neuron-#7|1	ACTCACTGAAGAAGAATGAATAAATGTAACAGTTCCGTAAGGTTTGCTGTTAGTAGCATTAAAAAAATAAATGCCACGCTCTGAAAATTTACTGAGATGTCAACCAGTTGACTTAATGCTTAAGCAAGTAAAAAAATAGTCACGAGCCAGGCGCGGTGGCTCACGCCTGTAATCCCAGCACTTTGGGAGGCCGAGGCGGGCGGATCACAAGGTCAGGAGATCGAGACCACGGTTCCTG	TGGGAGGCTGAGGCAGGAGAATGGCATGAACCCGGGACGTGGAGCTTGCAGTGAGCTGAGATCATGCCACTGCACTCCAGCCTGGGCAACAAAGCAAGACTCTTTCTCAAAAAAAAAAAAAAATAGTCACGAATGTAAGTTCAGATAACTTTCTTTAAGGTGGTCCTGGGTTCCAGATATCTAGATAGATGAACTGCTCTCAGG	ACAGTTCCGTAAGTTTAGCACTTAGTAGCATTAAAAAAATAACAGCCACGCTCTGAAAATTTACTGAGATGTCAACCAGTTGACTTAATGCTTAAGCAAGTAAAAAAATAGTCACGAGCCAGGCGCGGTGGCTCACGCCTGTAATCCCAGCACTTTGGGAGGCCGAGGCGGGCGGATCACAAGGTCAGGAGATCGAGACCACGGTGTAAACCCCGTCTCTACTAAAAATACAAAAAATTAGCCGGGCGCGGTTGTGGGCGCCTGTAGTCCCAGCTACTCGGGAGGCTGAGGCAGGAGAATGGCGCACTTGAAATACAA	ACAGTTCCGTAAGTTTAGCACTTAGTAGCATTAAAAAAATAACAGCCACGCTCTGAAAATTTACTGAGATGTCAACCAGTTGACTTAATGCTTAAGCAAGTAAAAAAATAGTCACGAGCCAGGCGCGGTGGCTCACGCCTGTAATCCCAGCACTTTGGGAGGCCGAGGCGGGCGGATCACAAGGTCAGGAGATCGAGACCACGGTGTAAACCCCGTCTCTACTAAAAATACAAAAAATTAGCCGGGCGCGGTTGTGGGCGCCTGTAGTCCCAGCTACTCGGGAGGCTGAGGCAGGAGAATGGCGCACTTGAAATACAA
e2de7ffc-2ee3-4fd0-9242-cb9cc0bc7add	Chr1	7096277	7096291	ALU	Alu_YRa4	0	269	-	-	N	GGCTTTTCTTTTTTT	Hippocampus.Single.WGS.ON22213.Neuron-#23|4,Hippocampus.Single.WGS.ON22213.Neuron-#25|2,Hippocampus.Single.WGS.ON22213.Neuron-#39|1,Liver.Bulk.WGS.ON22213|12,Hippocampus.Single.RC-seq.ON22213.Neuron-#23|1	Hippocampus.Single.WGS.ON22213.Neuron-#71|1,Hippocampus.Single.WGS.ON22213.Neuron-#23|10,Hippocampus.Single.WGS.ON22213.Neuron-#39|5,Liver.Bulk.WGS.ON22213|8,Hippocampus.Single.RC-seq.ON22213.Neuron-#23|5,Hippocampus.Single.RC-seq.ON22213.Neuron-#38|2,Hippocampus.Single.RC-seq.ON22213.Neuron-#39|3	TTAGTAGAGACGGGGTTTCACCGTGTTAGCCAGGATGGTCTCGAACTCCTGACCTCGTGATCCGCCCGTCTCGGCCTCCCAAAGTGCTGGGATTACAGGCTTGAGCCACCGCGCCCGGCCGGCTTTTCTTTTTTTGTACTTAACGTTCTTCAGAGGCTGGGCATGGTGGCGCACGTCTGTAATCCCAGCACTTTAGGAGGCTGAGATGGGAGGATTGCTTGAGTTCAGGAGCTTGCAGACCAGCCTGGACAACATATGGAGACCTTGTC	GGACTCATTTCTTAGGACTCTACTTATGCCAAAGCGACAGGCAGATTTTATCTGTGTTTAAGGACTCTCCTCAAGTTCACCTGGTATGTTGTGTCTGTAGCATGTTTTAGTGACTGCTGCTTCTTCATGTGGCTTTTCTTTTTTTTTTTTTTTTTGAGACGGAGGGTCTCGCTGTGTCGCCCAGGCTGGAGTGCAGTGGCCGGATCTCAGCTCACTGCAAGCTCCGCCTCCCGGGTTTTTACGCCATTCTCCTGCCTACATCC	AAGTACAAAAAAAGAAAAGCCGGCCGGGCGCGGTGGCTCAAGCCTGTAATCCCAGCACTTTGGGAGGCCGAGACGGGCGGATCACGAGGTCAGGAGTTCGAGACCATCCTGGCTAACACGGTGAAACCCCGTCTCTACTAAAAAATACAAAAAACTAGCCGGGCGAGGTGGCGGGCGCCTGTAGTCCCAGGGCTACTCGGGAGGCTGAGGCAGGAGAATGGCGTAAAAACCCGGGAGGCGGAGCTTGCAGTGAGCTGAGATCCGGCCACTGCACTCCAGCCTGGGCGACACAGCGAGACTCCGTCTCAAAAAAAAAAAAAAAAAGAAAAGCCACATGAAGAAGCAGCAGTCACTAAAACATGACTACAGACACAACATACCAGGTGAACTTGAGGAGAG…	AAGTACAAAAAAAGAAAAGCCGGCCGGGCGCGGTGGCTCAAGCCTGTAATCCCAGCACTTTGGGAGGCCGAGACGGGCGGATCACGAGGTCAGGAGTTCGAGACCATCCTGGCTAACACGGTGAAACCCCGTCTCTACTAAAAAATACAAAAAACTAGCCGGGCGAGGTGGCGGGCGCCTGTAGTCCCAGGGCTACTCGGGAGGCTGAGGCAGGAGAATGGCGTAAAAACCCGGGAGGCGGAGCTTGCAGTGAGCTGAGATCCGGCCACTGCACTCCAGCCTGGGCGACACAGCGAGACTCCGTCTCAAAAAAAAAAAAAAAAAGAAAAGCCACATGAAGAAGCAGCAGTCACTAAAACATGACTACAGACACAACATACCAGGTGAACTTGAGGAGAG…
d32b3870-96e2-4e85-b0de-4f0b437af7c5	Chr1	8082421	8082405	ALU	Alu_YRa4	0	269	+	+	N	AAATAAGCAGCAGTCGC	Hippocampus.Single.WGS.ON22212.Neuron-#19|4,Hippocampus.Single.WGS.ON22212.Neuron-#21|4,Hippocampus.Single.WGS.ON22212.Neuron-#7|24,Liver.Bulk.WGS.ON22212|14,Hippocampus.Single.RC-seq.ON22212.Neuron-#21|1,Hippocampus.Single.RC-seq.ON22212.Neuron-#7|6	Hippocampus.Single.WGS.ON22212.Neuron-#19|5,Hippocampus.Single.WGS.ON22212.Neuron-#21|3,Hippocampus.Single.WGS.ON22212.Neuron-#7|12,Liver.Bulk.WGS.ON22212|12,Hippocampus.Single.RC-seq.ON22212.Neuron-#7|4	GATCCGCCTGCCTTGGCCCCCCAACGTGCTGGGGTTACAGGCGTAAGCCACTGCGGCTCGCCTGATTGGGTATCTTAATACATTTTTTTCTACAGTAGGACAGATTAGACAAGACTAAGTATGGGATTGATAAATAAGCAGCAGTCGCAGCCGGGCGCGGTGGCTCAAGCCTGTAATCCCAGCACTTTGGGAGGCCGAGACGGGCGGATCATGAGGTCAGGAGATCGAGACCATCCTGGATAACCCAGTGAAACCCCGTCTCTACTAA	TCTGCCGTCACCCCGGCTGGGGGCGCTCGGCTTGCCCGGTTAACCCCCAACCGTCAACCCCGCGGGGGCACAGTCCCAAACCCCTTATAAAAAAAAAAAAAAAAAAAAAACAAAAAAAAAATAAGCAGCAGTCGCTCATGCTATCCGGGATGGAATTTGATATTTTATGGCTGAGATCATGTTCCCATGCTTAGTGTAACTTAAATTTTGTTGTTTACAGAGTGGTCTTGTTTTTGTATTCTGAGAC	GGCTCGCCTGATTGGGTATCTTAATACATTTTTTTCTACAGTAGGACAGATTAGACAAGACTAAGTATGGGATTGATAAATAAGCAGCAGTCGCAGCCGGGCGCGGTGGCTCAAGCCTGTAATCCCAGCACTTTGGGAGGCCGAGACGGGCGGATCATGAGGTCAGGAGATCGAGACCATCCTGGATAACCCAGTGAAACCCCGTCTCTACTAAAAAAATACAAAAAATTAGCCGGGCGCGGTGGCGGGCGCCTGTAGTCCCAGCTACGCGGGAGGCTGAGGCAGGAGAATGGCGTGAACCCGGGAGTGCGGAGCTTGCAGTGAGCTGAGATCCGGCCACTGTACTCCAGCCTGGGCGACAGAGCCAGACTCCGTCTCAAAAAAAAAAAAAAAAAAAGC…	GGCTCGCCTGATTGGGTATCTTAATACATTTTTTTCTACAGTAGGACAGATTAGACAAGACTAAGTATGGGATTGATAAATAAGCAGCAGTCGCAGCCGGGCGCGGTGGCTCAAGCCTGTAATCCCAGCACTTTGGGAGGCCGAGACGGGCGGATCATGAGGTCAGGAGATCGAGACCATCCTGGATAACCCAGTGAAACCCCGTCTCTACTAAAAAAATACAAAAAATTAGCCGGGCGCGGTGGCGGGCGCCTGTAGTCCCAGCTACGCGGGAGGCTGAGGCAGGAGAATGGCGTGAACCCGGGAGTGCGGAGCTTGCAGTGAGCTGAGATCCGGCCACTGTACTCCAGCCTGGGCGACAGAGCCAGACTCCGTCTCAAAAAAAAAAAAAAAAAAAGC…
48b2e082-97e2-4a4c-9077-603ade56b9ed	Chr1	8180317	8180305	ALU	Alu_YRa4	0	269	+	+	N	AAAACTAGTTATA	Hippocampus.Single.WGS.ON22212.Neuron-#16|3,Hippocampus.Single.WGS.ON22212.Neuron-#17|4,Hippocampus.Single.WGS.ON22212.Neuron-#19|15,Hippocampus.Single.WGS.ON22212.Neuron-#21|2,Hippocampus.Single.WGS.ON22212.Neuron-#37|4,Hippocampus.Single.WGS.ON22212.Neuron-#7|16,Hippocampus.Single.WGS.ON22213.Neuron-#14|1,Hippocampus.Single.WGS.ON22213.Neuron-#25|4,Hippocampus.Single.WGS.ON22213.Neuron-#38|1,Li…	Hippocampus.Single.WGS.ON22212.Neuron-#10|1,Hippocampus.Single.WGS.ON22212.Neuron-#16|2,Hippocampus.Single.WGS.ON22212.Neuron-#17|4,Hippocampus.Single.WGS.ON22212.Neuron-#19|12,Hippocampus.Single.WGS.ON22212.Neuron-#37|1,Hippocampus.Single.WGS.ON22212.Neuron-#7|13,Hippocampus.Single.WGS.ON22213.Neuron-#25|3,Hippocampus.Single.WGS.ON22213.Neuron-#38|4,Liver.Bulk.WGS.ON22212|21,Liver.Bulk.WGS.ON222…	ATTGTATGCAACGTTTGGGTAGCAAGATAAGTGATAATACAAATAAAAGGAATGAGGAAACAGAAAGAATTAATAATTAAATAGAAAATTTAAAATATAATTTAATGACACTGAGGTATCCCTTAAACACTTAATAAAACTAGTTATAGGCCGGCCGCGGTGGCTCAAGCCTGTAATCCCAGCACTTTGGGAGGCCGAGACGGGCGAGGGGCAGGGGGTGCAAAGGGCAGAGCTACTTCAGT	CGGCTGAGGCCGGACCATGGCGTGCACCCGGGAGGCAGAGCTGGCCTGGTGCTGAGTTCCGGCCACTTCACTCCCGCCTGGGTGAAAGTGCGTTACCCCGTCACAAAAAAAAAAAAAAAAAAAAAAAAACTAGTTATATATTTTAAATTGAAATATATTTTGAGATAATTTTTTAAAATTTTTTAAAAAATCATTTGCATTATATTCAAGATGCAACAGACACATAAATTAATCGATATTTGGGGTTTAGTGAAAATTTATTGCAAAGGT	CAAATAAAAGGAATGAGGAAACAGAAAGAATTAATAATTAAATAGAAAATTTAAAATATAATTTAATGACACTGAGGTATCCCTTAAACACTTAATAAAACTAGTTATAGGCCGGGCGCGGTGGCTCAAGCCTGTAATCCCAGCACTTTGGGAGGCCGAGACGGGCGGATCACGAGGTCAGGAGATCGAGACCATCCTGGGTAACACGGTGAAACCCCGTCTCTACTAAAAATACAAAAACTAGCCGGGCGAGGTGGCAGGCGTCTGTAGTCCCAGCTACTCGGGAGGCTGAGGCAGGAGAATGGCGTGAACCCGGGAGGCAGAGCTTGCAGTGAGCTGAGATCCGGCCACTGCACTCCAGCCTGGGTGACAGAGCGAGACTCCGTCTCAAAAAAAAAA…	CAAATAAAAGGAATGAGGAAACAGAAAGAATTAATAATTAAATAGAAAATTTAAAATATAATTTAATGACACTGAGGTATCCCTTAAACACTTAATAAAACTAGTTATAGGCCGGGCGCGGTGGCTCAAGCCTGTAATCCCAGCACTTTGGGAGGCCGAGACGGGCGGATCACGAGGTCAGGAGATCGAGACCATCCTGGGTAACACGGTGAAACCCCGTCTCTACTAAAAATACAAAAACTAGCCGGGCGAGGTGGCAGGCGTCTGTAGTCCCAGCTACTCGGGAGGCTGAGGCAGGAGAATGGCGTGAACCCGGGAGGCAGAGCTTGCAGTGAGCTGAGATCCGGCCACTGCACTCCAGCCTGGGTGACAGAGCGAGACTCCGTCTCAAAAAAAAAA…
13e004e8-2fde-40dc-b1ff-5cada808a271	Chr1	8325230	8325228	ALU	Alu_YRa4	0	269	+	+	N	AAA	Hippocampus.Single.WGS.ON22212.Neuron-#16|8,Hippocampus.Single.WGS.ON22212.Neuron-#19|1,Hippocampus.Single.WGS.ON22212.Neuron-#37|5,Hippocampus.Single.WGS.ON22213.Neuron-#14|3,Hippocampus.Single.WGS.ON22213.Neuron-#15|6,Hippocampus.Single.WGS.ON22213.Neuron-#71|3,Hippocampus.Single.WGS.ON22213.Neuron-#39|6,Hippocampus.Single.WGS.ON22213.Neuron-#47|11,Liver.Bulk.WGS.ON22212|12,Liver.Bulk.WGS.ON222…	Hippocampus.Single.WGS.ON22212.Neuron-#16|2,Hippocampus.Single.WGS.ON22212.Neuron-#19|1,Hippocampus.Single.WGS.ON22212.Neuron-#37|4,Hippocampus.Single.WGS.ON22213.Neuron-#15|1,Hippocampus.Single.WGS.ON22213.Neuron-#39|2,Hippocampus.Single.WGS.ON22213.Neuron-#47|4,Liver.Bulk.WGS.ON22212|12,Liver.Bulk.WGS.ON22213|12,Hippocampus.Single.RC-seq.ON22212.Neuron-#16|4,Hippocampus.Single.RC-seq.ON22212.Ne…	GTGAAAGCACTGACGTTGCTCCAATAAAATGGGTAACACCTAGGACTGATCCTTTAAAAATATCCATGTACGTAGATGCAAGTTTTATTTTATGCCTAAAGCGGGTGAATGGGATTTTAGTTAGAATCCTACAAGGTGTCTGTTAAATGGCCAGGCGCGGTGGCTCAAGCCTGTAATCCCAGCACTAAATTG	GGGTTGGCTTTGGCTGTTTATGGGGTTTACCCGGGTTGGGGTTGTTTGATGTTCGTTTTTACCGGCCAAATCCACCCATGCCTGGGGGGATTCCCCTTAAACGTTAAAAAAAAAAAAAAAAAAAAAAAAATTCAATTACTTTGACATATCACCTCTCTGAACGCCCCTT	CTAGGACTGATCCTTTAAAAATATCCATGTACGTAGATGCAAGTTTTATTTTATGCCTAAAGCGGGTGAATGGGATTTTAGTTAGAATCCTACAAGGTGTCTGTTAAATGGCCAGGCGCGGTGGCTCAAGCCTGTAATCCCAGCACTTTGGGGGGCCGGGTAGATGGGCGGATCACGAGGTCAGGAGATCGAGACCATCCTGGCTAACACGGTGAAACCCCGTCTCTACTAAAAAATACAAAAAACTAGCCGGGCGCGGTGGCGGGCGCCTGTAGTCCGAGCCACTCGGGAGGCTGAGGCAGGAGAATGGCGTGAACCCGGGAGGCGGAGCTTGCAGTGAGCTGAGATCCGGCCACTGCACTCCAGCCTGGGCGGCAGAGCGAGACTCCGTCTCAAAAA…	CTAGGACTGATCCTTTAAAAATATCCATGTACGTAGATGCAAGTTTTATTTTATGCCTAAAGCGGGTGAATGGGATTTTAGTTAGAATCCTACAAGGTGTCTGTTAAATGGCCAGGCGCGGTGGCTCAAGCCTGTAATCCCAGCACTTTGGGGGGCCGGGTAGATGGGCGGATCACGAGGTCAGGAGATCGAGACCATCCTGGCTAACACGGTGAAACCCCGTCTCTACTAAAAAATACAAAAAACTAGCCGGGCGCGGTGGCGGGCGCCTGTAGTCCGAGCCACTCGGGAGGCTGAGGCAGGAGAATGGCGTGAACCCGGGAGGCGGAGCTTGCAGTGAGCTGAGATCCGGCCACTGCACTCCAGCCTGGGCGGCAGAGCGAGACTCCGTCTCAAAAA…
3522ea29-03e3-46b2-9599-0f4a14c354c7	Chr1	8713327	8713316	ALU	Alu_YRc2	0	270	+	+	N	AATTAAATTTCT	Hippocampus.Single.WGS.ON22212.Neuron-#16|70,Hippocampus.Single.WGS.ON22212.Neuron-#19|4,Liver.Bulk.WGS.ON22212|15,Hippocampus.Single.RC-seq.ON22212.Neuron-#16|20,Hippocampus.Single.RC-seq.ON22212.Neuron-#19|1	Hippocampus.Single.WGS.ON22212.Neuron-#16|40,Hippocampus.Single.WGS.ON22212.Neuron-#19|2,Liver.Bulk.WGS.ON22212|9,Hippocampus.Single.RC-seq.ON22212.Neuron-#16|17	AATTACTTCTATTAAAATAGTAAATGTGGTTTTTGTTTCCCCAGCTTCACACAGAACTAGTAGAAGGGGTAACCAAAATTAATGGATTATATTTCTCTAAGTACTGAACAGCTTTCTGACACTGGAAGTTATTTCTAATGTATTAATTGCTTATAAATAATGTCTACTTGAATTGTTGACCATAAAATATGCCAGTTTCTCAGATTGTTTTTCCCAAATAAGTTTCATATTATTAGCACCGCCATGTGCAAATATATAAAGTCTTAAACATAGTTTGTTCTTTAATTAAATTTCTGGCCGGGCGCGGTGGCTCAAGCCTGTAATCCCAGCACTTTGGGAGGCCGAGATGGGCGGATCACGAGGTCAGGAGATCGAGACCATCCTGGCTGACACAGTGAA…	GGAGGCTGAGGCAGGAGAATGGCGTGAACCCGGGAGGCGGAGCTTGCAGTGAGCCAAGATCACGCCACTGCACTCCAGCCTGGGCGGCAGAGCGAGCCTCTGTCTCAAAAAAAAAAAAAAAAATTAAATTTCTTATGTTCTTTAATGACACTTATTTTTGAATATGCTATTATACAATTTCTTCATAAAGTATAGGAAAGGACTGAACAATCACATATTTCACATTCA	CCATAAAATATGCCAGTTTCTCAGATTGTTTTTCCCAAATAAGTTTCATATTATTAGCACCGCCATGTGCAAATATATAAAGTCTTAAACATAGTTTGTTCTTTAATTAAATTTCTGGCCGGGCGCGGTGGCTCAAGCCTGTAATCCCAGCACTTTGGGAGGCCGAGATGGGCGGATCACGAGGTCAGGAGATCGAGACCATCCTGGCTACCAACATGGAAACCCCGTCTCTACTAAAAAATACAAAAAAACTAGCCGGGCGAGGTGGCTGGGACTAC	CCATAAAATATGCCAGTTTCTCAGATTGTTTTTCCCAAATAAGTTTCATATTATTAGCACCGCCATGTGCAAATATATAAAGTCTTAAACATAGTTTGTTCTTTAATTAAATTTCTGGCCGGGCGCGGTGGCTCAAGCCTGTAATCCCAGCACTTTGGGAGGCCGAGATGGGCGGATCACGAGGTCAGGAGATCGAGACCATCCTGGCTACCAACATGGAAACCCCGTCTCTACTAAAAAATACAAAAAAACTAGCCGGGCGAGGTGGCTGGGACTAC
a7c4eea2-e159-46dd-a4e4-a2db3f42cdeb	Chr1	8885725	8885738	ALU	Alu_YRa4	0	270	-	-	N	GCCATTCACATTTT	Hippocampus.Single.WGS.ON22213.Neuron-#15|1,Hippocampus.Single.WGS.ON22213.Neuron-#71|13,Hippocampus.Single.WGS.ON22213.Neuron-#31|1,Hippocampus.Single.WGS.ON22213.Neuron-#52|1,Hippocampus.Single.WGS.ON22213.Neuron-#49|1,Liver.Bulk.WGS.ON22213|23,Hippocampus.Single.RC-seq.ON22213.Neuron-#15|1,Hippocampus.Single.RC-seq.ON22213.Neuron-#71|2,Hippocampus.Single.RC-seq.ON22213.Neuron-#52|1	Hippocampus.Single.WGS.ON22213.Neuron-#71|7,Hippocampus.Single.WGS.ON22213.Neuron-#31|1,Hippocampus.Single.WGS.ON22213.Neuron-#52|6,Liver.Bulk.WGS.ON22213|19,Hippocampus.Single.RC-seq.ON22213.Neuron-#71|1,Hippocampus.Single.RC-seq.ON22213.Neuron-#52|3	TTTTTTTTTTTTTTTTTCTTTGAGACGGAGTCTCGCTCTGTCGCCCAGGCTGGAGTGCAGTGGCGTGATCTCCGCTCACTGCAAGCTCCGCCTCCCGGGTTCCCGCCATTCTCCTGCCTCAGCCTCCTGAGTAGCTGGGACTACAGGCGCCGCCATCGCGCCCGGCTAATTTTTTTGTATTTTTAGTAGAGACGGGGTTTCACCGTGTTAGCCAGGATGGTCTCGATCTCCTGACCTTGTGATCCGCCCGCCTCGGCCTCCCAAAGTGCTGGGATTACAGGCGTGAGCCACCGCGCCCGGCGCCATTCACATTTTCAAAGAAAGGTGAGGGATTTGATTTTCCAAAGACGAAACGACAATGATCAAAAGCCCCTATACACATCTACACACCTGCTCCTG…	TTCTTTTCTTTTATTCCTTGCAGCAGGAAGTCATCTACCATGTTTCTACCAGATCCTCTTCCATATATTTTCTTCTAGGATTTTCTGTGCCTTGATTCTCTTTCTAAAAAGTCAGTTCTCTGTCTCCTCTCAGCCATTCACATTTTTTTTTTTTTTTTTTTCCTTATTGGAGACGGAGTCTTGCTCTGTCGCCCAGGCTGGAGTGCAGTGGCGTGATCTCCGCTCACTGCCAAAAAGCT	AGGTGTGTAGAGGTGTATAGGGGCTTTTGATCATTGTCGTTTCGTCTTTGGAAAATCAAATCCCTCACCTTTCTTTGAAAATGTGAATGGCGCCGGGCGCGGTGGCTCACGCCTGTAATCCCAGCACTTTGGGAGGCCGAGGCGGGCGGATCACAAGGTCAGGAGATCGAGACCATCCTGGCTAACACGGTGAAACCCCGTCTCTACTAAAAATACAAAAAAATTAGCCGGGCGCGATGGCGGCGCCTGATAGTCCCAGCTACTCAGGAGGCTGAGGCAGGAGAATGGCGGGAACCCGGGAGGCGGAGCTTGCAGTGAGCGGAGATCACGCCACTGCACTCCAGCCTGGGCGACAGAGCGAGACTCCGTCTCAAAGAAAAAAAAAAAAAAAAAAATGTG…	AGGTGTGTAGAGGTGTATAGGGGCTTTTGATCATTGTCGTTTCGTCTTTGGAAAATCAAATCCCTCACCTTTCTTTGAAAATGTGAATGGCGCCGGGCGCGGTGGCTCACGCCTGTAATCCCAGCACTTTGGGAGGCCGAGGCGGGCGGATCACAAGGTCAGGAGATCGAGACCATCCTGGCTAACACGGTGAAACCCCGTCTCTACTAAAAATACAAAAAAATTAGCCGGGCGCGATGGCGGCGCCTGATAGTCCCAGCTACTCAGGAGGCTGAGGCAGGAGAATGGCGGGAACCCGGGAGGCGGAGCTTGCAGTGAGCGGAGATCACGCCACTGCACTCCAGCCTGGGCGACAGAGCGAGACTCCGTCTCAAAGAAAAAAAAAAAAAAAAAAATGTG…
516d9eb3-789b-416d-8ddc-e4bfb0fae516	Chr1	9060211	9060226	ALU	Alu_YRa4	0	270	+	+	N	AAGAATGTAATTTCAG	Hippocampus.Single.WGS.ON22212.Neuron-#16|2,Hippocampus.Single.WGS.ON22212.Neuron-#17|6,Hippocampus.Single.WGS.ON22212.Neuron-#19|6,Hippocampus.Single.WGS.ON22213.Neuron-#69|1,Hippocampus.Single.WGS.ON22213.Neuron-#39|10,Hippocampus.Single.WGS.ON22213.Neuron-#47|2,Liver.Bulk.WGS.ON22212|7,Liver.Bulk.WGS.ON22213|11,Hippocampus.Single.RC-seq.ON22212.Neuron-#16|1,Hippocampus.Single.RC-seq.ON22212.Ne…	Hippocampus.Single.WGS.ON22212.Neuron-#16|4,Hippocampus.Single.WGS.ON22212.Neuron-#17|8,Hippocampus.Single.WGS.ON22212.Neuron-#19|8,Hippocampus.Single.WGS.ON22213.Neuron-#69|2,Hippocampus.Single.WGS.ON22213.Neuron-#39|11,Hippocampus.Single.WGS.ON22213.Neuron-#47|3,Liver.Bulk.WGS.ON22212|14,Liver.Bulk.WGS.ON22213|8,Hippocampus.Single.RC-seq.ON22212.Neuron-#16|3,Hippocampus.Single.RC-seq.ON22212.Ne…	CGTGCGTCCGGTCCCGGGTTTAAACCCGGCAGGCCGTCCTGGTCTGGCTAGGACAGCGTCCCCATAAACCCCACCCCAGCCTCCCGAGCGTGCCACCTTATAAAAAAAAAAAAAAAAAAATAAAAACAAGAATGTAATTTCAGAAATGTAATGATGCAAAATTTTGAATCCTTATGAGGTGTATCTGCATGGGCTAAAGTACGTGTGGAATGGCTCTCCCGGGAGCGTTGTCACAAAGGAACTCTCTTTGTTGACAATTCAACTTACCTCTA	ACACAAGCAAATGATTCAGAACATTGGATTTGGCAGTGATTTCTTAAGTATGACACTAAAGACACAAGAAATTAAAAAAAGACCATAAAATTAAAAAAAAAAATGCACACCAATGGTTGACCTTCTGACTTAATTTAGAAAGTTGAAATCACAAGGAATTACTTTTTAACTGTCATGATTTAAAAGTAAACATATTGAAGTTTTAACTTTGCATTTAATTTTATATGATGAATTTATAAGTACCCGAGAGAAGAGAGGAAGTGTCATCTTTTTTGCCTAAGAATGTAATTTCAGGGCCGGGCGCGGTGGCTCAAGCCTGTAATCCCAGCACTTTGGGAGGCCGAGACGGGTGGATCACGAGGTCAGGAGATCGAGACCATCCTGGTTAACACGGTGAAA…	TGCATTTAATTTTATATGATGAATTTATAAGTACCCGAGAGAAGAGAGGAAGTGTCATCTTTTTTGCCTAAGAATGTAATTTCAGGGCCGGGCGCGGTGGCTCAAGCCTGTAATCCCAGCACTTTGGGAGGCCGAGACGGGTGGATCACGAGGTCAGGAGATCGAGACCATCCTGGTTAACACGGTGAAACCCCGTCTCTACTAAAAAATACAAAAAACTAGCCGGGCGAGGTGGCGGGCGCCTGTAGTCCCAGCTACTCGGGAGGCTGAGGCAGGAGAATGGCGAAAACCCGGGAGGCGGAGCTTGCAGTGAGCTGAGATCCGGCCACTGCACCCCAGCCCAGGCGACAGAGCGAGACTCCGTCTCAAAAAAAAAAAAAAAAAAAAAAAAAAGAATGT…	TGCATTTAATTTTATATGATGAATTTATAAGTACCCGAGAGAAGAGAGGAAGTGTCATCTTTTTTGCCTAAGAATGTAATTTCAGGGCCGGGCGCGGTGGCTCAAGCCTGTAATCCCAGCACTTTGGGAGGCCGAGACGGGTGGATCACGAGGTCAGGAGATCGAGACCATCCTGGTTAACACGGTGAAACCCCGTCTCTACTAAAAAATACAAAAAACTAGCCGGGCGAGGTGGCGGGCGCCTGTAGTCCCAGCTACTCGGGAGGCTGAGGCAGGAGAATGGCGAAAACCCGGGAGGCGGAGCTTGCAGTGAGCTGAGATCCGGCCACTGCACCCCAGCCCAGGCGACAGAGCGAGACTCCGTCTCAAAAAAAAAAAAAAAAAAAAAAAAAAGAATGT…
714f64d0-435a-4854-bde0-d5e76d888ead	Chr1	10219497	10219485	ALU	Alu_YRb4	0	257	+	+	N	AAAAAGTAGAGTA	Hippocampus.Single.WGS.ON22213.Neuron-#25|7,Hippocampus.Single.WGS.ON22213.Neuron-#52|2,Hippocampus.Single.WGS.ON22213.Neuron-#49|3,Liver.Bulk.WGS.ON22213|15,Hippocampus.Single.RC-seq.ON22213.Neuron-#25|6,Hippocampus.Single.RC-seq.ON22213.Neuron-#52|1	Hippocampus.Single.WGS.ON22213.Neuron-#25|12,Hippocampus.Single.WGS.ON22213.Neuron-#52|2,Hippocampus.Single.WGS.ON22213.Neuron-#49|1,Liver.Bulk.WGS.ON22213|7,Hippocampus.Single.RC-seq.ON22213.Neuron-#25|1	AGATGTTATAGCCCACTCAGGCTATATGGTCCACAGCCTGTTGTTCCTAGGCTATAAAGCTGTACAGCATGTTAATGTACTCGATACTGAAGGCAATTATAATACAAAGTTAAGTATCTGTGTATCTAAACATATAAAAAGTAGAGTAGGCCGGGCGCAGTGGCTCAAGCCTGTAATCCCAGCACTTTGGGAGGCCGAGGCGGGCGGATCACAAGGTCAGGAGATCGAGACCACAGTGAAACCCCATCTCTACTAAAAATACAAATAAA	CGGCGGAGGCAGGTGAATGGCGGTAACCCGGGCGGGTGTGCGTGCATTCAGCCGCTTTCGCGCCACTGCACTCCAGCCTTGGCACCAGCGGGATACCCCGTCTCAAAAAAAAAAAAAAAAAAAAGTAGAGTAAAAATATGGTAGAGATTAAAAAATGGTGCATGTGTAAGGGCACTTACCATGAATAGAGTTTCCAGGACGGAAAGTTGCTCTGTGTGAGTTGGTGGGTGAGTGGTTAGTAAATGAGAAGGCCTGGGAGCACAGTA	GGCTATAAAGCTGTACAGCATGTTAATGTACTCGATACTGAAGGCAATTATAATACAAAGTTAAGTATCTGTGTATCTAAACATATAAAAAGTAGAGTAGGCCGGGCGCAGTGGCTCAAGCCTGTAATCCCAGCACTTTGGGAGGCCGAGGCGGGCGGATCACAAGGTCAGGAGATCGAGACCACAGTGAAACCCCCTCTCTACTAAAAATACAATAAAATTAGCCGGGCGCGGTGGCGGGCGCCTGTAGTCCCAGCTACTCAGGAGGCTGAGGCAGGAGAATGGCGGGAACCCGGGAGGCGGAGCTTGCAGTGAGCCGAGATCGCGCCACTGCACTCCAGCCTGGGCAACAGCGTGAGACTCCGTCTCAAAAAAAAAAAAAAAAAAAGAAGTAGAGTA…	GGCTATAAAGCTGTACAGCATGTTAATGTACTCGATACTGAAGGCAATTATAATACAAAGTTAAGTATCTGTGTATCTAAACATATAAAAAGTAGAGTAGGCCGGGCGCAGTGGCTCAAGCCTGTAATCCCAGCACTTTGGGAGGCCGAGGCGGGCGGATCACAAGGTCAGGAGATCGAGACCACAGTGAAACCCCCTCTCTACTAAAAATACAATAAAATTAGCCGGGCGCGGTGGCGGGCGCCTGTAGTCCCAGCTACTCAGGAGGCTGAGGCAGGAGAATGGCGGGAACCCGGGAGGCGGAGCTTGCAGTGAGCCGAGATCGCGCCACTGCACTCCAGCCTGGGCAACAGCGTGAGACTCCGTCTCAAAAAAAAAAAAAAAAAAAGAAGTAGAGTA…
e32c651f-dd50-479b-b820-2b32dfd98d36	Chr1	10334517	10334528	ALU	Alu_YRa4	0	269	-	-	N	GAGTATTTTCTT	Hippocampus.Single.WGS.ON22212.Neuron-#10|2,Hippocampus.Single.WGS.ON22212.Neuron-#16|3,Hippocampus.Single.WGS.ON22212.Neuron-#21|39,Liver.Bulk.WGS.ON22212|15,Hippocampus.Single.RC-seq.ON22212.Neuron-#16|2,Hippocampus.Single.RC-seq.ON22212.Neuron-#19|2,Hippocampus.Single.RC-seq.ON22212.Neuron-#21|6	Hippocampus.Single.WGS.ON22212.Neuron-#21|50,Liver.Bulk.WGS.ON22212|18,Hippocampus.Single.RC-seq.ON22212.Neuron-#21|16	TAGTAGAGACGGGGTTTCATTGTGTTAGCCAGGATGGTCTCGATCTCCTGACCTCGTGATCCGCCCGTCTCGGCCTCCCAAAGTGCTGGGATTACAGGCTTGAGCCACCGCGCCCGGCCGAGTATTTTCTTAAAATTTTTATTTAAAGAGAACTAACAAATTTGGTCACATTTCAATACTAATCACTAGTCAGTAATAATTACTGATAAATGCTTCATTTACAGTAAAGGGATAGATTATTTGCACCATTTCTGTATAGTTACCTC	CACCAGAAAATTTTTCTTGAGTGGACTTAAAGGAAGGGCATCAGGGGACACAACCTGACACCCTTTTAAAAAATTACATGAATTAAGTCACTTTTTTCTTTTTTGAGGCATAGCATATCTTTTTTATGATATATTGAGTATTTTCTTTTTTTTTTTTTTTGAGACGGAGTCTCTGGCGCTCTCCAGGCTGGAGTGCAGTGGCGCTATCTCGGCTCACTGCAAGCTCCGCCTCCCGGGTTTACGCCAGTTTTT	ATTTTAAGAAAATACTCGGCCGGGCGCGGTGGCTCAAGCCTGTAATCCCAGCACTTTGGGAGGCCGAGACGGGCGGATCACGAGGTCAGGAGATCGAGACCATCCTGGCTAACACAATGAAACCCCGTCTCTACTAAAAATACAAAAAAATTAGCCGGGCGAGGTGGCGGGCGCCTGTAGTCCCAGCTACTCGGGAGGCTGAGGCAGGAGAATGGCGTAAACCCGGGAGGCGGAGGCCTTGCAGTGAGCCGAGATAGCGCCACTGCACTCCAGCCTGGGCGACAGAGCGAGACTCCGTCTCAAATAAAAAAAAAAGAAAATACTCAATATATCATAAAAAAGATATGCTATGCCTCAAAAAAGAAAAAAGTGACTTAATTCATGTAATTTTTTAAAAGG…	ATTTTAAGAAAATACTCGGCCGGGCGCGGTGGCTCAAGCCTGTAATCCCAGCACTTTGGGAGGCCGAGACGGGCGGATCACGAGGTCAGGAGATCGAGACCATCCTGGCTAACACAATGAAACCCCGTCTCTACTAAAAATACAAAAAAATTAGCCGGGCGAGGTGGCGGGCGCCTGTAGTCCCAGCTACTCGGGAGGCTGAGGCAGGAGAATGGCGTAAACCCGGGAGGCGGAGGCCTTGCAGTGAGCCGAGATAGCGCCACTGCACTCCAGCCTGGGCGACAGAGCGAGACTCCGTCTCAAATAAAAAAAAAAGAAAATACTCAATATATCATAAAAAAGATATGCTATGCCTCAAAAAAGAAAAAAGTGACTTAATTCATGTAATTTTTTAAAAGG…
d9dfe50e-71b7-4294-91bb-48944113b201	Chr1	10410244	10410258	ALU	Alu_YRa4	0	270	+	+	N	AAAAACTAACTTCTG	Hippocampus.Single.WGS.ON22213.Neuron-#15|2,Hippocampus.Single.WGS.ON22213.Neuron-#71|11,Hippocampus.Single.WGS.ON22213.Neuron-#25|1,Hippocampus.Single.WGS.ON22213.Neuron-#52|1,Liver.Bulk.WGS.ON22213|6,Hippocampus.Single.RC-seq.ON22213.Neuron-#71|3	Hippocampus.Single.WGS.ON22213.Neuron-#15|1,Hippocampus.Single.WGS.ON22213.Neuron-#71|13,Hippocampus.Single.WGS.ON22213.Neuron-#25|6,Hippocampus.Single.WGS.ON22213.Neuron-#38|2,Hippocampus.Single.WGS.ON22213.Neuron-#52|3,Liver.Bulk.WGS.ON22213|9,Hippocampus.Single.RC-seq.ON22213.Neuron-#71|2,Hippocampus.Single.RC-seq.ON22213.Neuron-#31|1,Hippocampus.Single.RC-seq.ON22213.Neuron-#38|2	CAGGGAATCTCAACTGAACTGTTATTTGTTGCAAAGGAATGGTGATACATGGAATGTGCGCTTTATGAAAGAATTAAATTTAAAGATAAAGTAGCATATCTGATATTAGAATATTTTTCTGATGTGTTAATGATTCATAGCTACAGTTTGAATATTAAGATTAAGAGGTATATTTAGGTGTAAGACATAAGAAAGGTGGAAATCTTTCCTTTTTTAGTATGCTTAATGTCTATAGTAGATTTATATTTTTATTATGTGCATAAAAACTAACTTCTGGGCCGGGCGCGGTGGCTCAAGCCTGTAATCCCAGCACTTTGGGAGGCCGAGATGGGCGGATCATGAGGTCAGGAGATCGAGACCATCCTGGCTAACATGGTGAAACCCCGTCTCTACTAAAAA…	CAGGGAATCTCAACTGAACTGTTATTTGTTGCAAAGGAATGGTGATACATGGAATGTGCGCTTTATGAAAGAATTAAATTTAAAGATAAAGTAGCATATCTGATATTAGAATATTTTTCTGATGTGTTAATGATTCATAGCTACAGTTTGAATATTAAGATTAAGAGGTATATTTAGGTGTAAGACATAAGAAAGGTGGAAATCTTTCCTTTTTTAGTATGCTTAATGTCTATAGTAGATTTATATTTTTATTATGTGCATAAAAACTAACTTCTGGGCCGGGCGCGGTGGCTCAAGCCTGTAATCCCAGCACTTTGGGAGGCCGAGATGGGCGGATCATGAGGTCAGGAGATCGAGACCATCCTGGCTAACATGGTGAAACCCCGTCTCTACTAAAAA…	ATTTAGGTGTAAGACATAAGAAAGGTGGAAATCTTTCCTTTTTTAGTATGCTTAATGTCTATAGTAGATTTATATTTTTATTATGTGCATAAAAACTAACTTCTGGGCCGGGCGCGGTGGCTCAAGCCTGTAATCCCAGCACTTTGGGAGGCCGAGATGGGCGGATCATGAGGTCAGGAGATCGAGACCATCCTGGCTAACATGGTGAAACCCCGTCATTCT	ATTTAGGTGTAAGACATAAGAAAGGTGGAAATCTTTCCTTTTTTAGTATGCTTAATGTCTATAGTAGATTTATATTTTTATTATGTGCATAAAAACTAACTTCTGGGCCGGGCGCGGTGGCTCAAGCCTGTAATCCCAGCACTTTGGGAGGCCGAGATGGGCGGATCATGAGGTCAGGAGATCGAGACCATCCTGGCTAACATGGTGAAACCCCGTCATTCT
ee7f0fdc-1f22-4ca3-9c51-db7ad7e72977	Chr1	11503961	11503947	L1	L1_RS2	5606	6299	+	+	N	TAAAAAAAATCTGTT	Hippocampus.Single.WGS.ON22213.Neuron-#14|23,Hippocampus.Single.WGS.ON22213.Neuron-#23|10,Hippocampus.Single.WGS.ON22213.Neuron-#25|3,Hippocampus.Single.WGS.ON22213.Neuron-#31|8,Liver.Bulk.WGS.ON22213|11,Hippocampus.Single.RC-seq.ON22212.Neuron-#19|1,Hippocampus.Single.RC-seq.ON22213.Neuron-#14|14,Hippocampus.Single.RC-seq.ON22213.Neuron-#15|1,Hippocampus.Single.RC-seq.ON22213.Neuron-#23|6,Hippoc…	Hippocampus.Single.WGS.ON22213.Neuron-#14|28,Hippocampus.Single.WGS.ON22213.Neuron-#23|23,Hippocampus.Single.WGS.ON22213.Neuron-#31|6,Hippocampus.Single.WGS.ON22213.Neuron-#38|1,Hippocampus.Single.WGS.ON22213.Neuron-#39|2,Hippocampus.Single.WGS.ON22213.Neuron-#47|7,Liver.Bulk.WGS.ON22213|12,Hippocampus.Single.RC-seq.ON22213.Neuron-#14|5,Hippocampus.Single.RC-seq.ON22213.Neuron-#23|1	ATGCCAAAGATAAGGCCTCCAACACTCTTCATCTATACTTCTTTTTTAGTCCCCAAACTGCTGTCCTCATCTCCAGTTTTGTTTACATTCAGCCTTTTTCCTAAAGAGCCACTAGAATCATTCTTTAATTTAAAAAAAATCTGTTGTACCATATGACCCAGCCATCCCATTACTGGGTATATACCCAAAGGATTATAAATTATGCTGCTATAAAGACATACCCATGC	CAATGAGATCACTCGGACTCAGGAAGGGGAACATCACACACCGGGGCCTATCATGGGGAGGGGGGAGGGGGGAGGGATTGCATTGGGAGTTATACCTGATGTAAATGACGAGTTGATGGGTGCAGCACAGCAACATGGCACAAGTATACATATGTAACAAACCTGCACGTTATGCACATGTACCCTACAACTTAAAGTATAATAATAATAAATAAATTTAAAAAAAAAAATAAAAAAAATAAATAAAAAAAAATAAAAAAAATAAAAAAAATCTGTTTCAACTCCTGCCTCCTCTATTTGATCTGCTGCCACTTTTCTAACTCCACTCTACATCTGGTCATGCAAAGCTCTCTGAAATTCCCATTTGCAATCCTCCTTGTGTCTCTAAGGCTTACATAT…	TTCTTTTTTAGTCCCCAAACTGCTGTCCTCATCTCCAGTTTTGTTTACATTCAGCCTTTTTCCTAAAGAGCCACTAGAATCATTCTTTAATTTAAAAAAAATCTGTTGTACCATATGACCCAGCCATCCCATTACTGGGTATATACCCAAAGGATTATAAATTATGCTGCTATAAAGACATACCATGCACACGTATGTTTATTGCAGCACTATTCACAATAGCAACAGAGACTTGGAATCAACCCAAATGTCCATCAGTGACAGATTGGATTAAGAAAATGTGGCACATATACACCATGGAATACTATGCAGCCATAAAAAAGGATGAGTTTGAGTCCTTTGTAGGGACTTGGATGCAGCTGGAATCCATCATTCTTAGCAAACTATCACAAGAACAGA…	TTCTTTTTTAGTCCCCAAACTGCTGTCCTCATCTCCAGTTTTGTTTACATTCAGCCTTTTTCCTAAAGAGCCACTAGAATCATTCTTTAATTTAAAAAAAATCTGTTGTACCATATGACCCAGCCATCCCATTACTGGGTATATACCCAAAGGATTATAAATTATGCTGCTATAAAGACATACCATGCACACGTATGTTTATTGCAGCACTATTCACAATAGCAACAGAGACTTGGAATCAACCCAAATGTCCATCAGTGACAGATTGGATTAAGAAAATGTGGCACATATACACCATGGAATACTATGCAGCCATAAAAAAGGATGAGTTTGAGTCCTTTGTAGGGACTTGGATGCAGCTGGAATCCATCATTCTTAGCAAACTATCACAAGAACAGA…
de1e7fc1-61d1-4529-8441-5e47385e84ad	Chr1	11729215	11729228	ALU	Alu_YRa4	0	270	+	+	N	AAAAAAGGGAAGAA	Hippocampus.Single.WGS.ON22213.Neuron-#14|2,Hippocampus.Single.WGS.ON22213.Neuron-#71|1,Hippocampus.Single.WGS.ON22213.Neuron-#25|14,Hippocampus.Single.WGS.ON22213.Neuron-#31|1,Hippocampus.Single.WGS.ON22213.Neuron-#38|23,Hippocampus.Single.WGS.ON22213.Neuron-#49|1,Liver.Bulk.WGS.ON22213|9,Hippocampus.Single.RC-seq.ON22213.Neuron-#25|4,Hippocampus.Single.RC-seq.ON22213.Neuron-#38|11	Hippocampus.Single.WGS.ON22213.Neuron-#25|6,Hippocampus.Single.WGS.ON22213.Neuron-#31|1,Hippocampus.Single.WGS.ON22213.Neuron-#38|18,Liver.Bulk.WGS.ON22213|14,Hippocampus.Single.RC-seq.ON22213.Neuron-#25|4,Hippocampus.Single.RC-seq.ON22213.Neuron-#31|1,Hippocampus.Single.RC-seq.ON22213.Neuron-#38|17	GCAGGTGATTTGCTTAAACCCGGGGGGGGGAGGTTGCTGTGAGCCGATATAGCGCCACTGCACACCAGCCTGGGCGAAATAGCGCTACACCGTCAAAAAAAAAAAAAAAAAAAAAAAAAAAAAAAAAGGGAAGAAAATTCAGTTGGGGTGGTTAAATTGTGAGTGCATTTCTTTCTTGTGGTTCAATTTATGGAAATGTTTTCCAATAAATAATAATAAATAATGAAAAAGAACTGGTTGGTTGGGCTTAGGGAGAACCGTTTAAGT	AGGTGCTGGGATTACAGGCATGAATCACCGTGCCAGGACTTAATTTTTTTTAAATAGAAAAAAAAAGGCACATGGCTGTAGTCCCAACTATTCAGAGGGCTGAGGCAAGAGGAATATGCTTGGGCCCAGGAGTCTGAGGCTGCCGAAAGCCATGGTCATACCACTGTACGCAAACCTGAGTGACAGAGCAAGACCCTGTTCTCAAAAAATAAAAATTACATCGAAAAAAGGGAAGAAGGCCGGGTGCGGTGGCTCAAGCCTGTAATCCCAGCACTTTGGGAGGCCGAGACGGGCGGATCACGAGGTCAGGAGATCGAGACCATCCTGGCTAACACAATGAAACCCCGTCTCTACTAAAAATACAAAAAAATTAGCCGGGCGAGGTGGCGGCGCCTGTAG…	CCAGGAGTCTGAGGCTGCCGAAAGCCATGGTCATACCACTGTACGCAAACCTGAGTGACAGAGCAAGACCCTGTTCTCAAAAAATAAAAATTACATCGAAAAAAGGGAAGAAGGCCGGGTGCGGTGGCTCAAGCCTGTAATCCCAGCACTTTGGGAGGCCGAGACGGGCGGATCACGAGGTCAGGAGATCGAGACCATCCTGGCTAACACAATGAAACCCCGTCTCTACTAAAAATACAAAAAAATTAGCCGGGCGAGGTGGCGGCGCCTGTAGTCCCAGCTACTCGGGAGGCTGAGGCAGGAGAATGGGGCGT	CCAGGAGTCTGAGGCTGCCGAAAGCCATGGTCATACCACTGTACGCAAACCTGAGTGACAGAGCAAGACCCTGTTCTCAAAAAATAAAAATTACATCGAAAAAAGGGAAGAAGGCCGGGTGCGGTGGCTCAAGCCTGTAATCCCAGCACTTTGGGAGGCCGAGACGGGCGGATCACGAGGTCAGGAGATCGAGACCATCCTGGCTAACACAATGAAACCCCGTCTCTACTAAAAATACAAAAAAATTAGCCGGGCGAGGTGGCGGCGCCTGTAGTCCCAGCTACTCGGGAGGCTGAGGCAGGAGAATGGGGCGT
e6e761a0-2c8c-400a-a884-e6eb139d658a	Chr1	11879292	11879301	ALU	Alu_YRa4	0	270	-	-	N	CATGTCTTTC	Hippocampus.Single.WGS.ON22212.Neuron-#16|1,Hippocampus.Single.WGS.ON22212.Neuron-#19|4,Hippocampus.Single.WGS.ON22212.Neuron-#21|2,Hippocampus.Single.WGS.ON22212.Neuron-#37|2,Hippocampus.Single.WGS.ON22212.Neuron-#7|6,Liver.Bulk.WGS.ON22212|19,Hippocampus.Single.RC-seq.ON22212.Neuron-#7|7	Hippocampus.Single.WGS.ON22212.Neuron-#19|3,Hippocampus.Single.WGS.ON22212.Neuron-#21|2,Hippocampus.Single.WGS.ON22213.Neuron-#39|1,Liver.Bulk.WGS.ON22212|16,Hippocampus.Single.RC-seq.ON22212.Neuron-#16|1,Hippocampus.Single.RC-seq.ON22212.Neuron-#7|3	TGATTGGCTAGATTTATTAGTAGAATCCTAGGGCAAGCCATTCATGAAGCATTTGGTAGAGGAGGAAGAATCTGTAAGAAGTGATGAGGAAAGATTGCTTGGAGCAAAAGGACTAGAACCAGGAAAGCGGAATTGAGAAGGAGGCTGGCTTTCAGTATGTAAAGAAGGCAGTGACTGGCAGGATTAAATAAAGCCTATGGGTTTGCAAATTACAGATAGTCCTTTGGATTTACCAGTTAGAAGGCCATCAGTGACCTTTTGATAGTAACTTAGGAAAGACATGCGGCCGGGCGCGGTGGCTCAAGCCTGTAATCCCAGCACTTTGGGAGGCCGAGACGGGCGGATCACGAGGTCAGGAGATCGAGACCATCCTGGCTAACACGGTGAAACCCCGTCTCT…	TGATTGGCTAGATTTATTAGTAGAATCCTAGGGCAAGCCATTCATGAAGCATTTGGTAGAGGAGGAAGAATCTGTAAGAAGTGATGAGGAAAGATTGCTTGGAGCAAAAGGACTAGAACCAGGAAAGCGGAATTGAGAAGGAGGCTGGCTTTCAGTATGTAAAGAAGGCAGTGACTGGCAGGATTAAATAAAGCCTATGGGTTTGCAAATTACAGATAGTCCTTTGGATTTACCAGTTAGAAGGCCATCAGTGACCTTTTGATAGTAACTTAGGAAAGACATGCGGCCGGGCGCGGTGGCTCAAGCCTGTAATCCCAGCACTTTGGGAGGCCGAGACGGGCGGATCACGAGGTCAGGAGATCGAGACCATCCTGGCTAACACGGTGAAACCCCGTCTCT…	TGATAGTAACTTAGGAAAGACATGCGGCCGGGCGCGGTGGCTCAAGCCTGTAATCCCAGCACTTTGGGAGGCCGAGACGGGCGGATCACGAGGTCAGGAGATCGAGACCATCCTGGCTAACACGGTGAAACCCCGTCTCTACTAAAAAATACAAAAAACTAGCCGGGCGAGGTGGCGGGCGCCTGTAGTCCCAGCTACTCGGGAGGCTGAGACAGGAGAATGGCGTAAACCCGGGAGGCGGAGCTTGCAGTGAGCCGAGATCGCGCCACTGCACTCCAGCCTGGGTGACAGAGCCAGACTCCGTCTCAAAAAAAAAAAAAAAAAAAAAAAAGAAAAGACATGGGCATGGAACCACTGAGCACCTAATGAAGGGAAGAGGTATTGAAATGTTCATATGGC…	TGATAGTAACTTAGGAAAGACATGCGGCCGGGCGCGGTGGCTCAAGCCTGTAATCCCAGCACTTTGGGAGGCCGAGACGGGCGGATCACGAGGTCAGGAGATCGAGACCATCCTGGCTAACACGGTGAAACCCCGTCTCTACTAAAAAATACAAAAAACTAGCCGGGCGAGGTGGCGGGCGCCTGTAGTCCCAGCTACTCGGGAGGCTGAGACAGGAGAATGGCGTAAACCCGGGAGGCGGAGCTTGCAGTGAGCCGAGATCGCGCCACTGCACTCCAGCCTGGGTGACAGAGCCAGACTCCGTCTCAAAAAAAAAAAAAAAAAAAAAAAAGAAAAGACATGGGCATGGAACCACTGAGCACCTAATGAAGGGAAGAGGTATTGAAATGTTCATATGGC…
f26266c8-8107-4bf7-a532-50e71e362c97	Chr1	16948192	16948205	ALU	Alu_YRa4	0	270	+	+	N	AAAAAAATATTTTC	Hippocampus.Single.WGS.ON22213.Neuron-#69|13,Hippocampus.Single.WGS.ON22213.Neuron-#25|1,Hippocampus.Single.WGS.ON22213.Neuron-#38|14,Hippocampus.Single.WGS.ON22213.Neuron-#49|1,Liver.Bulk.WGS.ON22213|6,Hippocampus.Single.RC-seq.ON22213.Neuron-#69|6,Hippocampus.Single.RC-seq.ON22213.Neuron-#38|3	Hippocampus.Single.WGS.ON22213.Neuron-#69|33,Hippocampus.Single.WGS.ON22213.Neuron-#38|25,Liver.Bulk.WGS.ON22213|10,Hippocampus.Single.RC-seq.ON22213.Neuron-#69|15,Hippocampus.Single.RC-seq.ON22213.Neuron-#38|7	ACCCGGAGAGGCGAGGCTTGAGGCAAGAGCGAGGTCCCCAACCCCCCCCCCCCCTGGGAGAAAAGCAGAAGACAAAAAAAAAAAAAAAAAAAAAAAAAAAAAAAAAAAAAAAAAAAAAAAAAAAAAAATATTTTCACATGTATTGACTCTTTTGAGTTTTTCCACAACCGTGAAAGGCAGGCTTCATTTTGCAGGATCAACAAGGTAAATGATCAGCTTAAAATCATACAAGTGCTAAGTAGAAGACAACTTCAGATCCAGACCTCT	CATCTCAAGCATTCACGTTCTCCCAAGTGTCTGAGACCATCCTGAAGATTGAGGAAGGCAGGTCTACAGAACCAGAAATTGAAAATACTTCTTTTTATATTAAGAAATCTACCTGAATTACCAGGTACCTCTTGAGAGCCACTGTACTCTAGGTTGAGTACAGTGTTCTCGCTTGACTGGGTTACGTCCTGCTTTAGATTGGTTCCATTCACTCCATATAGCAGAAATTAAAAAAAAAAATTTGAAGGATATATGTATATGTTGCTTTTTTTAAAAAAATATTTTCGGCCGGGCGCGGTGGCTCAAGCCTGTAATCCCAGCACTTTGGGAGGCCGAGGCGGGCGGATCACGAGGTCAGGAGATCGAGACCATCCTGGCTAACACAATGAAACCCCGTCT…	CGCTTGACTGGGTTACGTCCTGCTTTAGATTGGTTCCATTCACTCCATATAGCAGAAATTAAAAAAAAAAATTTGAAGGATATATGTATATGTTGCTTTTTTTAAAAAAATATTTTCGGCCGGGCGCGGTGGCTCAAGCCTGTAATCCCAGCACTTTGGGAGGCCGAGGCGGGCGGATCACGAGGTCAGGAGATCGAGACCATCCTGGCTAACACAATGAAACCCCGTCTCCACTAAAAATACAAAAAAATTAGCCGGGCGTGGTGGCGGCGCCTGTAGTCCCAGCTACTCGGGAGGCTGAGGCAGGAGAATGGCGGGAACCCGGGAGGCGGAGCTTGCAGTGAGCCGAGATCGCGCCACCGCACTCCAGCCTGGGCGACAGAGCGAGACTCCGCTCTC…	CGCTTGACTGGGTTACGTCCTGCTTTAGATTGGTTCCATTCACTCCATATAGCAGAAATTAAAAAAAAAAATTTGAAGGATATATGTATATGTTGCTTTTTTTAAAAAAATATTTTCGGCCGGGCGCGGTGGCTCAAGCCTGTAATCCCAGCACTTTGGGAGGCCGAGGCGGGCGGATCACGAGGTCAGGAGATCGAGACCATCCTGGCTAACACAATGAAACCCCGTCTCCACTAAAAATACAAAAAAATTAGCCGGGCGTGGTGGCGGCGCCTGTAGTCCCAGCTACTCGGGAGGCTGAGGCAGGAGAATGGCGGGAACCCGGGAGGCGGAGCTTGCAGTGAGCCGAGATCGCGCCACCGCACTCCAGCCTGGGCGACAGAGCGAGACTCCGCTCTC…
01e78687-11a8-4599-9291-0a0698bbc263	Chr1	17402071	17402085	ALU	Alu_YRa4	0	269	-	-	N	TAAATCGTGATTCTT	Hippocampus.Single.WGS.ON22213.Neuron-#69|53,Hippocampus.Single.WGS.ON22213.Neuron-#25|9,Hippocampus.Single.WGS.ON22213.Neuron-#31|7,Hippocampus.Single.WGS.ON22213.Neuron-#39|5,Liver.Bulk.WGS.ON22213|11,Hippocampus.Single.RC-seq.ON22213.Neuron-#15|3,Hippocampus.Single.RC-seq.ON22213.Neuron-#69|15,Hippocampus.Single.RC-seq.ON22213.Neuron-#25|3,Hippocampus.Single.RC-seq.ON22213.Neuron-#31|1,Hippoca…	Hippocampus.Single.WGS.ON22213.Neuron-#15|1,Hippocampus.Single.WGS.ON22213.Neuron-#69|29,Hippocampus.Single.WGS.ON22213.Neuron-#25|8,Hippocampus.Single.WGS.ON22213.Neuron-#31|2,Liver.Bulk.WGS.ON22213|8,Hippocampus.Single.RC-seq.ON22213.Neuron-#15|2,Hippocampus.Single.RC-seq.ON22213.Neuron-#69|21,Hippocampus.Single.RC-seq.ON22213.Neuron-#25|6,Hippocampus.Single.RC-seq.ON22213.Neuron-#31|2	TAGTAGAGACGGGGTTTCACTGTGTTAGCCAGGATGGTCTCGATCTCCTGACCTCGTGATCCGCCCGTCTCGGCCTCCCAAAGTGCTGGGATTACAGGCTTGAGCCACCGCGCCCGGCCTTAAATCGTGATTCTTATGAGAACTTAATATAATAGAGATGGTGTTGCAAATTGACTATTAGGAAATTTCTATATAAGCTTCAGATTGATTCCATACCTGAATAGGAAAGTGTGAACCTTTAAGACTTCTAAAACGTTTTAGACAAAAAC	AGAAAACAAGATGGGAATAGTTGCCCTCTCATTTATTAAAACTCATTATAAATGTATAGTAATTAACGAGTATTGTATTGGTGCAGGGACACACAAACAGACCAATGGAATAGAAAAGAGAGAGCCTAGAAATAAATCGTGATTCTTTTTTTTTTTTTTTTTTTTTTTTTGTTTAAGGTGGAGTTCTCGCGATGTCACCCAGGCTGGAGTGTGCACAGTGGCTGGATCTCAGCTCACAGCAAGCGCCGCCACCCGGGTT	AAGTTCTCATAAGAATCACGATTTAAGGCCGGGCGCGGTGGCTCAAGCCTGTAATCCCAGCACTTTGGGAGGCCGAGACGGGCGGATCACGAGGTCAGGAGATCGAGACCATCCTGGCTAACACAGTGAAACCCCGTCTCTACTAAAAATACAAAAACTTGTAGCCGCGCGACGCGGCAGGCGCCTGTGGTCCCAGCTACTCCGGAGGCTGAGGCAGGAGAATGGCGTGAACCCGGGAGGCGGAGCTTGCAGTGAGCTGAGATCCAGCCACTGCACTCCAGCCTGGGTGACAGAGCGAGACTCCGTCTCAAAAAAAAAAAAAGAAAAAAAAAAGAATCACGATTTATTTCTAGGCTCTCTCTTTTCTATTCCATTGGTCTGTTTTTTGTGTTCCCTGCA…	AAGTTCTCATAAGAATCACGATTTAAGGCCGGGCGCGGTGGCTCAAGCCTGTAATCCCAGCACTTTGGGAGGCCGAGACGGGCGGATCACGAGGTCAGGAGATCGAGACCATCCTGGCTAACACAGTGAAACCCCGTCTCTACTAAAAATACAAAAACTTGTAGCCGCGCGACGCGGCAGGCGCCTGTGGTCCCAGCTACTCCGGAGGCTGAGGCAGGAGAATGGCGTGAACCCGGGAGGCGGAGCTTGCAGTGAGCTGAGATCCAGCCACTGCACTCCAGCCTGGGTGACAGAGCGAGACTCCGTCTCAAAAAAAAAAAAAGAAAAAAAAAAGAATCACGATTTATTTCTAGGCTCTCTCTTTTCTATTCCATTGGTCTGTTTTTTGTGTTCCCTGCA…
0a064cf1-5934-48fc-a046-531785cc32b0	Chr1	18048771	18048756	ALU	Alu_YRa4	0	270	-	-	N	CACTTTGGATTTTCTT	Hippocampus.Single.WGS.ON22213.Neuron-#15|2,Hippocampus.Single.WGS.ON22213.Neuron-#25|1,Hippocampus.Single.WGS.ON22213.Neuron-#31|2,Hippocampus.Single.WGS.ON22213.Neuron-#39|5,Hippocampus.Single.WGS.ON22213.Neuron-#52|1,Liver.Bulk.WGS.ON22213|13,Hippocampus.Single.RC-seq.ON22213.Neuron-#15|3,Hippocampus.Single.RC-seq.ON22213.Neuron-#25|3,Hippocampus.Single.RC-seq.ON22213.Neuron-#31|1,Hippocampus.…	Hippocampus.Single.WGS.ON22213.Neuron-#15|2,Hippocampus.Single.WGS.ON22213.Neuron-#25|1,Hippocampus.Single.WGS.ON22213.Neuron-#31|3,Hippocampus.Single.WGS.ON22213.Neuron-#39|6,Hippocampus.Single.WGS.ON22213.Neuron-#52|2,Liver.Bulk.WGS.ON22213|22,Hippocampus.Single.RC-seq.ON22213.Neuron-#15|1,Hippocampus.Single.RC-seq.ON22213.Neuron-#31|1,Hippocampus.Single.RC-seq.ON22213.Neuron-#39|6,Hippocampus.…	TTGTTCCACTACATTCCAGCTTGGGTGACAGAGTGAGACCCTGTCTCTAAAACAACAACAAAATAAACCCTAATTTAAGGACGTTTATTCAGGATAAAGTGCTGGGGCTTGATTGCATGAACACTGATACCCACTTTGGATTTTCTTTTTTTTTTTTTTTTTTTTTTTTTTTTTTTTATTTTTTTTCGAAGGGGGGTTTCACAAGCTGCGCCCCCGGCTGGGGTGCGCGGGGGGG	TTTTTTTTTTTTTTTTTTTTTTTTTTTTTGAGACGGAGTCTCACGCTGCTGCCCAGGCTGGAGTGCAGTGGCGCGATCTCGGCTCACTGCAAGCTCCGCCTCCCGGGTTCCCGCCATTCTCCTGCCTCAGCCTCCTGAGTAGCTGGGACTACAGGCGCCCGCCACCGCGCCCGGCTAATTTTTTGTATTTTTAGTAGAGACGGGGTTTCACTGTGGTCTCGATCTCCTGACCTTGTGATCCGCCCGCCTCGGCCTCCCAAAGTGCTGGGATTACAGGCTTGAGCCACCGCGCCCGGCCCTCACTTTGGATTTTCTTATGTCTTTTTGGTTTACTTTTGCATTCTGAACTGTCTTCTGTATTTTCATGTTGCCTGAATACAACTGATTGCTGGCTCAAAA…	GTTCAGAATGCAAAAGTAAACCAAAAAGACATAAGAAAATCCAAAGTGAGGGCCGGGCGCGGTGGCTCAAGCCTGTAATCCCAGCACTTTGGGAGGCCGAGGCGGGCGGATCACAAGGTCAGGAGATCGAGACCACAGTGAAACCCCGTCTCTACTAAAAATACAAAAAATTAGCCGGGCGCGGTGGCGGGCGCCTGTAGTCCCAGCTACTCAGGAGGCTGAGGCAGGAGAATGGCGGGAACCCGGGAGGCGGAGCTTGCAGTGAGCCGAGATCGCGCCACTGCACTCCAGCCTGGGCAGCAGCGTGAGACTCCGTCTCAAAAAAAAAAAAAAAAAAAAAAAAAAAAAAAAAAAAAAAAAAAAAAAAAGTGGGTAGAAGTTTTATTGAAAAAAACCCCC…	GTTCAGAATGCAAAAGTAAACCAAAAAGACATAAGAAAATCCAAAGTGAGGGCCGGGCGCGGTGGCTCAAGCCTGTAATCCCAGCACTTTGGGAGGCCGAGGCGGGCGGATCACAAGGTCAGGAGATCGAGACCACAGTGAAACCCCGTCTCTACTAAAAATACAAAAAATTAGCCGGGCGCGGTGGCGGGCGCCTGTAGTCCCAGCTACTCAGGAGGCTGAGGCAGGAGAATGGCGGGAACCCGGGAGGCGGAGCTTGCAGTGAGCCGAGATCGCGCCACTGCACTCCAGCCTGGGCAGCAGCGTGAGACTCCGTCTCAAAAAAAAAAAAAAAAAAAAAAAAAAAAAAAAAAAAAAAAAAAAAAAAAGTGGGTAGAAGTTTTATTGAAAAAAACCCCC…
8dbaba28-9b25-4d51-a428-51fef691aa78	Chr1	19080922	19080928	ALU	Alu_YRa4	0	269	-	-	N	TTCCTTT	Hippocampus.Single.WGS.ON22212.Neuron-#10|16,Hippocampus.Single.WGS.ON22212.Neuron-#16|43,Hippocampus.Single.WGS.ON22212.Neuron-#19|6,Hippocampus.Single.WGS.ON22212.Neuron-#21|1,Liver.Bulk.WGS.ON22212|15,Hippocampus.Single.RC-seq.ON22212.Neuron-#10|1,Hippocampus.Single.RC-seq.ON22212.Neuron-#16|18,Hippocampus.Single.RC-seq.ON22212.Neuron-#21|1	Hippocampus.Single.WGS.ON22212.Neuron-#10|7,Hippocampus.Single.WGS.ON22212.Neuron-#16|25,Hippocampus.Single.WGS.ON22212.Neuron-#21|2,Liver.Bulk.WGS.ON22212|12,Hippocampus.Single.RC-seq.ON22212.Neuron-#16|19	TAGAGACGGGGTTTCACCGTGTTAGCCAGGCTGGTCTCGATCTCCTGACCTCGTGATCCGCCCGTCTCGGCCTCCCAAAGTGCTGGGATTACAGGCTTGAGCCACCGTGCCCGGCCAATGGTTCCTTTATCATTGTGAAATAATCTTTCTATCCCTGATAATATTATTTCCTCTGAGACATATAGGTTGTGTTATATCTTAA	TCAAAAATGGGATAGTAAGCTCTCTATCATTGTGGATTTTTCTATTTCTTCTTGTTCTATCAATCTTTGATTTGTATGCTTTGAAGATCTTTTATTAGGTACATATATATTTAGTATTGTTATATTCTCTTGATGAATTGATTCCTTTTTTTTTTTTTTTTTTTTTTTTTGGAGAGCATAGAGTCTCGCTCTGTCACCCAGGCTGGAGTGCAGTGGCTGGATCTCAGCTCACTACAAGCTCTGCCTCCCAGGTTTTAAGCCATATAAACAGC	AAGATTATTTCACAATGATAAAGGAACCATTGGCCGGGCACGGTGGCTCAAGCCTGTAATCCCAGCACTTTGGGAGGCCGAGACGGGCGGATCACGAGGTCAGGAGATCGAGACCAGCCTGGCTAACACGGTGAAACCCCGTCTCTACTAAAAATACAAAAAACTAGCCGGGCGAGGTGGCAGGCGCCTGTAGTCCCAGCTATTTGGGAGGCTGAGGCAGGAGAATGGCGTAAACCTGGGAGGCAGAGCTTGTAGTGAGCTGAGATCCAGCCACTGCACTCCAGCCTGGGTGACAGAGCGAGACTCTGTCTCAAAAAAAAAAAAAAAAAAAAAAAAAGGAAAATGAAATTCATAACAAGAGAATATAACAATACTAAATATATATGTACCTAATAAAAG…	AAGATTATTTCACAATGATAAAGGAACCATTGGCCGGGCACGGTGGCTCAAGCCTGTAATCCCAGCACTTTGGGAGGCCGAGACGGGCGGATCACGAGGTCAGGAGATCGAGACCAGCCTGGCTAACACGGTGAAACCCCGTCTCTACTAAAAATACAAAAAACTAGCCGGGCGAGGTGGCAGGCGCCTGTAGTCCCAGCTATTTGGGAGGCTGAGGCAGGAGAATGGCGTAAACCTGGGAGGCAGAGCTTGTAGTGAGCTGAGATCCAGCCACTGCACTCCAGCCTGGGTGACAGAGCGAGACTCTGTCTCAAAAAAAAAAAAAAAAAAAAAAAAAGGAAAATGAAATTCATAACAAGAGAATATAACAATACTAAATATATATGTACCTAATAAAAG…
14d37d03-a0ef-4424-888d-e608f289f089	Chr1	20457324	20457337	ALU	Alu_YRa4	0	270	-	-	N	CCCACATGGTTTCT	Hippocampus.Single.WGS.ON22213.Neuron-#14|2,Hippocampus.Single.WGS.ON22213.Neuron-#15|7,Hippocampus.Single.WGS.ON22213.Neuron-#71|5,Hippocampus.Single.WGS.ON22213.Neuron-#38|1,Hippocampus.Single.WGS.ON22213.Neuron-#39|1,Hippocampus.Single.WGS.ON22213.Neuron-#52|12,Hippocampus.Single.WGS.ON22213.Neuron-#47|1,Hippocampus.Single.WGS.ON22213.Neuron-#49|5,Liver.Bulk.WGS.ON22213|6,Hippocampus.Single.RC…	Hippocampus.Single.WGS.ON22213.Neuron-#14|1,Hippocampus.Single.WGS.ON22213.Neuron-#15|6,Hippocampus.Single.WGS.ON22213.Neuron-#71|5,Hippocampus.Single.WGS.ON22213.Neuron-#38|1,Hippocampus.Single.WGS.ON22213.Neuron-#39|1,Hippocampus.Single.WGS.ON22213.Neuron-#52|26,Hippocampus.Single.WGS.ON22213.Neuron-#49|7,Liver.Bulk.WGS.ON22213|12,Hippocampus.Single.RC-seq.ON22213.Neuron-#71|2,Hippocampus.Singl…	TTTTAGTAGAGACGGGGTTTCACCGTGTTAACCAGGATGGTCTCGATCTCCCGACCTCGTGATCCGCCCGTCTCGGCCTCCCAAAGTGCTGGGATTACAGGCTTGAGCCACCGCGCCCGGCCCCACATGGTTTCTATAGCTCATGGGCCATGAGGGCAACAGCACATTCACTCCAGGAAGAGC	CACATGGAAAGATGTGTAGAATGTCTAGTGTGAGAGGCCTGAGAGGCTCTGAAAACTGCTACTGCTCATGATGATATGGGAGCAGAAAATTGAGCCAGAGAGAAGCTTGAATTTGATGCAGGACTATGGTAATCCCACATGGTTTCTTTTTTTTTTTTGAGACGGAGTCTCGCTCGTTGTCACCCAGGCTGGAGTGCAGTGGCCGGATCTCAGCTCACTGCAAGCTCCGCCTCCCGGGGTTTCACGCCACATTTCCTTCAAATCCATCCACGAT	GGCCCATGAGCTATAGAAACCATGTGGGGCCGGGCGCGGTGGCTCAAGCCTGTAATCCCAGCACTTTGGGAGGCCGAGACGGGCGGATCACGAGGTCGGGAGATCGAGACCATCCTGGTTAACACGGTGAAACCCCGTCTCTACTCAAAAAAAAAATACAAAAAACTAGCCGGGCGAGGTGGCGGGCGCCTGTAGTCCCAGCTCCTCGGGAGGCTGAGGCAGGAGAATGGCGTGAACCCGGGAGGCGGAGCTTGCAGTGAGCTGAGATCCGGCCACTGCACTCCAGCCTGGGTGACAGAGCGAGACTCCGTCTCAAAAAAAAAAAAGAAACCATGTGGGATTACCATAGTCCTGCATCAAATTCAAGCTTCTCTCTGGCTCAATTTTCTGCTCCCATAT…	GGCCCATGAGCTATAGAAACCATGTGGGGCCGGGCGCGGTGGCTCAAGCCTGTAATCCCAGCACTTTGGGAGGCCGAGACGGGCGGATCACGAGGTCGGGAGATCGAGACCATCCTGGTTAACACGGTGAAACCCCGTCTCTACTCAAAAAAAAAATACAAAAAACTAGCCGGGCGAGGTGGCGGGCGCCTGTAGTCCCAGCTCCTCGGGAGGCTGAGGCAGGAGAATGGCGTGAACCCGGGAGGCGGAGCTTGCAGTGAGCTGAGATCCGGCCACTGCACTCCAGCCTGGGTGACAGAGCGAGACTCCGTCTCAAAAAAAAAAAAGAAACCATGTGGGATTACCATAGTCCTGCATCAAATTCAAGCTTCTCTCTGGCTCAATTTTCTGCTCCCATAT…
81d37362-6b53-4e63-b83f-6752e01c0d7e	Chr1	20560111	20560122	ALU	Alu_YRa4	0	270	-	-	N	CCTTTAGCTCTT	Hippocampus.Single.WGS.ON22212.Neuron-#19|4,Hippocampus.Single.WGS.ON22212.Neuron-#37|11,Hippocampus.Single.WGS.ON22212.Neuron-#7|10,Liver.Bulk.WGS.ON22212|14,Hippocampus.Single.RC-seq.ON22212.Neuron-#19|1,Hippocampus.Single.RC-seq.ON22212.Neuron-#37|2,Hippocampus.Single.RC-seq.ON22212.Neuron-#7|3	Hippocampus.Single.WGS.ON22212.Neuron-#19|8,Hippocampus.Single.WGS.ON22212.Neuron-#37|12,Hippocampus.Single.WGS.ON22212.Neuron-#7|7,Liver.Bulk.WGS.ON22212|12,Hippocampus.Single.RC-seq.ON22212.Neuron-#19|1,Hippocampus.Single.RC-seq.ON22212.Neuron-#7|2	AGATGGCCCAGACTTGCTCTTCTCTAGCCTCACTGACTATAGTTAATTTGATAATTATTAATATGTGTTAAGTTTTAAGAATTATTGTGGAAATGTGTATGTTTTGTGCTGTGTGGATGTGTGTCTGTGTGAATGCGCTTTTCTGTAAAAAAAGAGATACAAAAGTGACTCGAGAAAGATGTCAGCAAGATGGCAGAATAAGACTTTCCAATGCTCAGTCCCCTACGAAACATCAATTTGAAAACTATCCACACACACAAAAAAATCGCATTCATAAGAGCTAAAGGGGCCGGGCGCGGTGGCTCAAGCCTGTAATCCCAGCACTTTGGGAGGCCGAGACGGGCGGATCACTAGGTCAGGAGATCGAGACCATCCTGGCTAACACGGTGAAACCCCGTC…	AGATGGCCCAGACTTGCTCTTCTCTAGCCTCACTGACTATAGTTAATTTGATAATTATTAATATGTGTTAAGTTTTAAGAATTATTGTGGAAATGTGTATGTTTTGTGCTGTGTGGATGTGTGTCTGTGTGAATGCGCTTTTCTGTAAAAAAAGAGATACAAAAGTGACTCGAGAAAGATGTCAGCAAGATGGCAGAATAAGACTTTCCAATGCTCAGTCCCCTACGAAACATCAATTTGAAAACTATCCACACACACAAAAAAATCGCATTCATAAGAGCTAAAGGGGCCGGGCGCGGTGGCTCAAGCCTGTAATCCCAGCACTTTGGGAGGCCGAGACGGGCGGATCACTAGGTCAGGAGATCGAGACCATCCTGGCTAACACGGTGAAACCCCGTC…	TCGCATTCATAAGAGCTAAAGGGGCCGGGCGCGGTGGCTCAAGCCTGTAATCCCAGCACTTTGGGAGGCCGAGACGGGCGGATCACTAGGTCAGGAGATCGAGACCATCCTGGCTAACACGGTGAAACCCCGTCTCTACTAAAAAAAAAAATACAAAAAACTAGCCGGGCTGAGGTGGCGGGCGCCTGTAGTCCCAGCTACTCAGGGGAGGCTGAGGCAGGAGAATGGCCCGAACCCGGGAGGTGGAGCTTGCAGTGAGCTGAGATCCGGCCACTGCACTCCAGCCTGGGCGACAGAGCGAGACTCCGTCTCAAAAAAAAAAAAAAAAAAAAAAGAGCTAAAGGAAATAGGTGAGAGACTACTGTACCTAAGATGTAGCACAGAAATAAATTGATACAT…	TCGCATTCATAAGAGCTAAAGGGGCCGGGCGCGGTGGCTCAAGCCTGTAATCCCAGCACTTTGGGAGGCCGAGACGGGCGGATCACTAGGTCAGGAGATCGAGACCATCCTGGCTAACACGGTGAAACCCCGTCTCTACTAAAAAAAAAAATACAAAAAACTAGCCGGGCTGAGGTGGCGGGCGCCTGTAGTCCCAGCTACTCAGGGGAGGCTGAGGCAGGAGAATGGCCCGAACCCGGGAGGTGGAGCTTGCAGTGAGCTGAGATCCGGCCACTGCACTCCAGCCTGGGCGACAGAGCGAGACTCCGTCTCAAAAAAAAAAAAAAAAAAAAAAGAGCTAAAGGAAATAGGTGAGAGACTACTGTACCTAAGATGTAGCACAGAAATAAATTGATACAT…
9a329daa-102d-4efe-9a90-b02aed0097d4	Chr1	21204615	21204626	ALU	Alu_YRa4	0	270	-	-	N	GAAAATTTTTTA	Hippocampus.Single.WGS.ON22212.Neuron-#19|3,Liver.Bulk.WGS.ON22212|21	Hippocampus.Single.WGS.ON22212.Neuron-#19|8,Hippocampus.Single.WGS.ON22212.Neuron-#37|3,Liver.Bulk.WGS.ON22212|18,Hippocampus.Single.RC-seq.ON22212.Neuron-#19|1	AAAGGGAGCAGCTTGGTCATGAAAACAAACTGTTATATATAACAAAGGTAGCCAAAACAAAGCAAAAAAACAAAAACTATTTAAAGGATTAAAAAATAAAACAAAAAAAGAGATCATATAGTAGAAGTAACTGTATAATGAAGCTGTGCCATGTACACAGTAAAATAACCAATAGAGCCGAAATGGAACATATAAGTCATGTTCATGAATGTAAATGACATAACTCACATATTAAAAGGAAAATTTTTTATTTTATTTTATTTTTTTATTTTTATTTTTTGAGACGGAGTCTCGCTCTGTCGCCCAGGTTGGAGTGCAGTGGCCGGATCTCAGCTCACTGCAAGCTCCGCCTCCCGGGTTCACGCCATTCTCCTGCCTCAGCCTCCCGAGTAGCTGGGA…	AAAGGGAGCAGCTTGGTCATGAAAACAAACTGTTATATATAACAAAGGTAGCCAAAACAAAGCAAAAAAACAAAAACTATTTAAAGGATTAAAAAATAAAACAAAAAAAGAGATCATATAGTAGAAGTAACTGTATAATGAAGCTGTGCCATGTACACAGTAAAATAACCAATAGAGCCGAAATGGAACATATAAGTCATGTTCATGAATGTAAATGACATAACTCACATATTAAAAGGAAAATTTTTTATTTTATTTTATTTTTTTATTTTTATTTTTTGAGACGGAGTCTCGCTCTGTCGCCCAGGTTGGAGTGCAGTGGCCGGATCTCAGCTCACTGCAAGCTCCGCCTCCCGGGTTCACGCCATTCTCCTGCCTCAGCCTCCCGAGTAGCTGGGA…	TCTTCAATTCTTTGTTTTAGGTGCATCTAGTGTACACTGCGCAGAGTTGATTTTGTTTTGTGAGCCAATTTAAAAAATTTTCAGGCCGGGCGCGGTGGCTCAAGCCTGTAATCCCAGCACTTTGGGAGGCCGAGACGAGCGGATCACAAGGTCAGGAGATCGAGACCATCCTGGCTAACATGGTGAAACCCCGTCTCTACTAAAAAATACAAAAAAAAAACTAGCCGGGCGAGGTGGCGGGCGCCTGTAGTCCCAGCTACTCGGGAGGCTGAGGCAGGAGAATGGCGTGAACCCGGGAGGCGGAGCTTGCAGTGAGCTGAGATCCGGCCACTGCACTCCAACCTGGGCGACAGAGCGAGACTCCGTCTCAAAAAATAAAAATAAAAAAATAAAATAAAA…	TCTTCAATTCTTTGTTTTAGGTGCATCTAGTGTACACTGCGCAGAGTTGATTTTGTTTTGTGAGCCAATTTAAAAAATTTTCAGGCCGGGCGCGGTGGCTCAAGCCTGTAATCCCAGCACTTTGGGAGGCCGAGACGAGCGGATCACAAGGTCAGGAGATCGAGACCATCCTGGCTAACATGGTGAAACCCCGTCTCTACTAAAAAATACAAAAAAAAAACTAGCCGGGCGAGGTGGCGGGCGCCTGTAGTCCCAGCTACTCGGGAGGCTGAGGCAGGAGAATGGCGTGAACCCGGGAGGCGGAGCTTGCAGTGAGCTGAGATCCGGCCACTGCACTCCAACCTGGGCGACAGAGCGAGACTCCGTCTCAAAAAATAAAAATAAAAAAATAAAATAAAA…
f12def1f-db81-4fea-9c34-41158d375d74	Chr1	25116690	25116678	ALU	Alu_YRa4	0	269	-	-	N	CACCAAGAGAAGG	Hippocampus.Single.WGS.ON22212.Neuron-#17|32,Hippocampus.Single.WGS.ON22212.Neuron-#21|13,Liver.Bulk.WGS.ON22212|7,Hippocampus.Single.RC-seq.ON22212.Neuron-#17|5,Hippocampus.Single.RC-seq.ON22212.Neuron-#21|2	Hippocampus.Single.WGS.ON22212.Neuron-#16|2,Hippocampus.Single.WGS.ON22212.Neuron-#17|28,Hippocampus.Single.WGS.ON22212.Neuron-#21|22,Liver.Bulk.WGS.ON22212|14,Hippocampus.Single.RC-seq.ON22212.Neuron-#17|11,Hippocampus.Single.RC-seq.ON22212.Neuron-#21|1	GAGATGATGCCAGTTATATCCAAGCGAAGTTGAATAGGCTGTGTGTGTGTGTGTGTGTGTGTGTGTGTGCGTGCGCGTGCGCGCATACAGGTGTCATCAGCATTTGGGAGCATTTGAAACTGGATGAGGTCACCAAGAGAAGGAATGTTTTTTTTTTTTTTTTTTTTATTTTTTTTTTTTTGAGACGGGGTCTCCCGCTTTTGCCCAGGGGGG	CTGAAACCTCTGACAGTTACTCCCTCCTAAAACTTTTGTTTTGTTTTTTAACAGTTTAGCTTTTGGAATGCCTCTCCCTCTTGATTCTCTTATCTCATTGACTGCTCATTCCCTGGTTCTCCTGACTTTTATATGATTAAGAGCCCAAATCATTTCTCTGACAGCTTGTCTATTTAACATTCCTTCTCGGCCGGGCGCGGTGGCTCAAGCCTGTAATCCCAGCACTTTGGGAGGCCGAGGCGGGCGGATCACAAGGTCAGGAGATCGAGACCACAGTGAAACCCCGTCTCTACTAAAAATACAAAAAATTAGCCGGGCGCGGTGGCGGGCGCCTGTAGTCCTAGCTACTCAGGAGGCTGAGGCAGGAGAATGGCGGGAACCCAGGAGGCGGAGCTTGCA…	TCATTTCTCTGACAGTTTGTCTATTTAACATTCTTTCTCGGCCGGGCGCGGTGGCTCAAGCCTGTAATCCCAGCACTTTGGGAGGCCGAGGCGGGCGGATCACAAGGTCAGGAGATCGAGACCACAGTGAAACCCCGTCTCTACTAAAAATACAAAAAATTAGCCGGGCGCGGTGGCGGGCGCCTGTAGTCCTAGCTACTCAGGAGGCTGAGGCAGGAGAATGGCGTGGAACCCAGGAGGCGGAGCTTGCAGTGAGCCAAGATCGCGCCACTGCACTCCAGCCTGGGCAACAGCGTGAGACTCCGTCTCAAAAAAAAAAAAAAAAAAAAAAAAAAAAAAAAAAAAAAAAAATACATGTCATGTTTG	TCATTTCTCTGACAGTTTGTCTATTTAACATTCTTTCTCGGCCGGGCGCGGTGGCTCAAGCCTGTAATCCCAGCACTTTGGGAGGCCGAGGCGGGCGGATCACAAGGTCAGGAGATCGAGACCACAGTGAAACCCCGTCTCTACTAAAAATACAAAAAATTAGCCGGGCGCGGTGGCGGGCGCCTGTAGTCCTAGCTACTCAGGAGGCTGAGGCAGGAGAATGGCGTGGAACCCAGGAGGCGGAGCTTGCAGTGAGCCAAGATCGCGCCACTGCACTCCAGCCTGGGCAACAGCGTGAGACTCCGTCTCAAAAAAAAAAAAAAAAAAAAAAAAAAAAAAAAAAAAAAAAAATACATGTCATGTTTG
9bc76758-9602-4fcc-8db5-47db019de63f	Chr1	26552697	26552713	ALU	Alu_YRb4	0	258	+	+	N	AAAAATGAACAACTTTT	Hippocampus.Single.WGS.ON22213.Neuron-#15|11,Liver.Bulk.WGS.ON22213|6,Hippocampus.Single.RC-seq.ON22213.Neuron-#15|4	Hippocampus.Single.WGS.ON22213.Neuron-#15|14,Hippocampus.Single.WGS.ON22213.Neuron-#71|3,Hippocampus.Single.WGS.ON22213.Neuron-#31|1,Liver.Bulk.WGS.ON22213|12,Hippocampus.Single.RC-seq.ON22213.Neuron-#15|6,Hippocampus.Single.RC-seq.ON22213.Neuron-#31|1	CGGGCTCATGTCCTTCCACATATTTTCTTCACCTCCCACCCCCCCAGGCCAACCCCCAACCACACCCCCAAAAAAAAAAAAAAAAAAAAAAACAAACAAAAAAAAAAAAAAAAAAATGAACAACTTTTATCCCCTGACCTAGCAATTTTACCTATAGAAATTAATTCCAAGGTAAAAACTTGTACAAACTTTTATGTATAAGTCTGTTCTCTGCGTAATATCCTATCTT	TTTTTTTTTTTTTTTTTTTTTTTTTTTTTGAGACGGAGTCTTGCGCTGTGGCCCAGGCTGGAGTGCAGTGACCAGATCTCGGCTCACTGCAAGCTCCGCCTCCCGGGTTCACGCCATTCTCCTGCCTCAGCCTCCCGAGTAGCTGGGACTACAGGCGCCCGCCACCGCGCCCGGCTAGGTTTTTTTTGTATTTTTCAGTAGAGACGGAGTTTCACCGTGTTAGCCAGGATGGTCTCGATCTCCTGACCTCGTGATCCGCCCGTCTCGGCCTCCCAAAGTGCTGGGATTACAGGCTTGAGCCACCGCGCCCGGCAAAAGATGTTCATTTTTAATTTGTTTTGTCTTGCCCTTCCTAAAATGACAGAGTAGTTTAATAGAACTTTGACTTATGTTATTTCG…	ATAAGTCAAAGTTCTATTAAACTACTCTGTCATTTTAGGAAGGGCAAGACAAAACAAATTAAAAATGAACATCTTTTGCCGGGCGCGGTGGCTCAAGCCTGTAATCCCAGCACTTTGGGAGGCCGAGACGGGCGGATCACGAGGTCAGGAGATCGAGACCATCCTGGCTAACACGGTGAAACTCCGTCTCTACTGAAAAATACAAAAAAAACCTAGCCGGGCGCGGTGGCGGGCGCCTGTAGTCCCAGCTCCTCGGGAGGCTGAGGCAGGAGAATGGCGTGAACCCGGGAGGCGGAGCTTGCAGTGAGCCGAGATCTGGTCACTGCACTCCAGCCTGGGCCACAGCGCAAGACTCCGTCTCAAAAAAAAAAAAAAAAAAAAAAAAAAAAAAAAAAAAAA…	ATAAGTCAAAGTTCTATTAAACTACTCTGTCATTTTAGGAAGGGCAAGACAAAACAAATTAAAAATGAACATCTTTTGCCGGGCGCGGTGGCTCAAGCCTGTAATCCCAGCACTTTGGGAGGCCGAGACGGGCGGATCACGAGGTCAGGAGATCGAGACCATCCTGGCTAACACGGTGAAACTCCGTCTCTACTGAAAAATACAAAAAAAACCTAGCCGGGCGCGGTGGCGGGCGCCTGTAGTCCCAGCTCCTCGGGAGGCTGAGGCAGGAGAATGGCGTGAACCCGGGAGGCGGAGCTTGCAGTGAGCCGAGATCTGGTCACTGCACTCCAGCCTGGGCCACAGCGCAAGACTCCGTCTCAAAAAAAAAAAAAAAAAAAAAAAAAAAAAAAAAAAAAA…
d705e148-5924-41a1-b1e0-e93a7ae3670c	Chr1	27302536	27302550	ALU	Alu_YRa4	0	270	-	-	N	GAAGCCAGAATTTTC	Hippocampus.Single.WGS.ON22213.Neuron-#15|11,Liver.Bulk.WGS.ON22213|10,Hippocampus.Single.RC-seq.ON22213.Neuron-#15|6	Hippocampus.Single.WGS.ON22213.Neuron-#15|6,Hippocampus.Single.WGS.ON22213.Neuron-#49|1,Liver.Bulk.WGS.ON22213|13,Hippocampus.Single.RC-seq.ON22213.Neuron-#15|7	GTGTATGTGGTTTAGAATGTAAGTTGATAGTTCCAATACAAATGTATTTATTACAAAATAATTTTATTTCAAATAATTTCTAAACTCTGGGCTTAAGTCTGTCATCTTAAACTGGAGTCACCCCCGACCCTGTGTATCTTTTCTCTTCTAGATACTGTCTTAGCTCTCCTTCTTTCTAGTACCAAAGTTTCCAAACAGTTGTCTATATTTTACTTCCTTCATTTCTGCACTTTGAACTTATGAAAATTCTGGCTTCATGGCCGGGCGCGGTGGCTCAAGCCTGTAATCCCAGCACTTTGGGAGGCCGAGACGGGCGGATCACAAGGTCAGGAGATCGAGACCATCCTGGCTAACACGGTGAAACCCCATCTCTACTAAAAAATACAAAAAAACTAGCCG…	GTGTATGTGGTTTAGAATGTAAGTTGATAGTTCCAATACAAATGTATTTATTACAAAATAATTTTATTTCAAATAATTTCTAAACTCTGGGCTTAAGTCTGTCATCTTAAACTGGAGTCACCCCCGACCCTGTGTATCTTTTCTCTTCTAGATACTGTCTTAGCTCTCCTTCTTTCTAGTACCAAAGTTTCCAAACAGTTGTCTATATTTTACTTCCTTCATTTCTGCACTTTGAACTTATGAAAATTCTGGCTTCATGGCCGGGCGCGGTGGCTCAAGCCTGTAATCCCAGCACTTTGGGAGGCCGAGACGGGCGGATCACAAGGTCAGGAGATCGAGACCATCCTGGCTAACACGGTGAAACCCCATCTCTACTAAAAAATACAAAAAAACTAGCCG…	ACTTATGAAAATTCTGGCTTCATGGCCGGGCGCGGTGGCTCAAGCCTGTAATCCCAGCACTTTGGGAGGCCGAGACGGGCGGATCACAAGGTCAGGAGATCGAGACCATCCTGGCTAACACGGTGAAACCCCATCTCTACTAAGAATACAAAAAAACTAGCCGGGCGAAGTGGCGGGTGCCTGTGGTCCCAGCTACTCGGGAGGCTGAGGCAGGAGAATGGCGTAATCCCGGGAGGCGGAGCTTGCAGTGAGCTGAGATCCGGCCATGAAGCCAGAATTTTCATAAGTTCAAAGTGCAGAAATG	ACTTATGAAAATTCTGGCTTCATGGCCGGGCGCGGTGGCTCAAGCCTGTAATCCCAGCACTTTGGGAGGCCGAGACGGGCGGATCACAAGGTCAGGAGATCGAGACCATCCTGGCTAACACGGTGAAACCCCATCTCTACTAAGAATACAAAAAAACTAGCCGGGCGAAGTGGCGGGTGCCTGTGGTCCCAGCTACTCGGGAGGCTGAGGCAGGAGAATGGCGTAATCCCGGGAGGCGGAGCTTGCAGTGAGCTGAGATCCGGCCATGAAGCCAGAATTTTCATAAGTTCAAAGTGCAGAAATG
bd274dc3-a641-46ce-ac59-87d3f406a849	Chr1	28011823	28011837	ALU	Alu_YRa4	0	270	-	-	N	AAAATCCTCTTTTCT	Hippocampus.Single.WGS.ON22212.Neuron-#17|2,Hippocampus.Single.WGS.ON22212.Neuron-#19|12,Hippocampus.Single.WGS.ON22212.Neuron-#21|2,Liver.Bulk.WGS.ON22212|12,Hippocampus.Single.RC-seq.ON22212.Neuron-#21|1	Hippocampus.Single.WGS.ON22212.Neuron-#19|8,Hippocampus.Single.WGS.ON22212.Neuron-#21|1,Liver.Bulk.WGS.ON22212|12,Hippocampus.Single.RC-seq.ON22212.Neuron-#19|3	GAGCAGAAACCCCCACCTATTGTGAACTGCGCATGCGCGGGATCTAGGGTGCAGGTTCCTTATGATAATCTAAATTAATGCCTGATGAGCTGAGGTGGAAGTTTCATCCCAAAACCATTCTCGCTCCCTACCCTCACCTTCCCCCATCCATGGAAAAATTAACTTCCATGAAACCGGTCCCTGGTGTCAAAAAGTTGGGGACTATTGTTCTATACTGCTATCGGGTGACTATAAAATAATTCACGTGTATCTTCAAATAGAAAAGAGGATTTTAGGCCGGGCGCGGTGGCTCAAGCCTGTAATCCCAGCACTTTGGGAGGCCGAGACGGGTGGATCACGAGGTCAGAAGATCGAGACCATCCTGGCGAACACGGTGAAACCCCGTCTCTACTAAAAAAT…	GAGCAGAAACCCCCACCTATTGTGAACTGCGCATGCGCGGGATCTAGGGTGCAGGTTCCTTATGATAATCTAAATTAATGCCTGATGAGCTGAGGTGGAAGTTTCATCCCAAAACCATTCTCGCTCCCTACCCTCACCTTCCCCCATCCATGGAAAAATTAACTTCCATGAAACCGGTCCCTGGTGTCAAAAAGTTGGGGACTATTGTTCTATACTGCTATCGGGTGACTATAAAATAATTCACGTGTATCTTCAAATAGAAAAGAGGATTTTAGGCCGGGCGCGGTGGCTCAAGCCTGTAATCCCAGCACTTTGGGAGGCCGAGACGGGTGGATCACGAGGTCAGAAGATCGAGACCATCCTGGCGAACACGGTGAAACCCCGTCTCTACTAAAAAAT…	TGAAACCGGTCCCTGGTGTCAAAAAGTTGGGGACTATTGTTCTATACTGCTATCGGGTGACTATAAAATAATTCACGTGTATCTTCAAATAGAAAAGAGGATTTTAGGCCGGGCGCGGTGGCTCAAGCCTGTAATCCCAGCACTTTGGGAGGCCGAGACGGGTGGATCACCGTGTTCGCCAGGATGGTCT	TGAAACCGGTCCCTGGTGTCAAAAAGTTGGGGACTATTGTTCTATACTGCTATCGGGTGACTATAAAATAATTCACGTGTATCTTCAAATAGAAAAGAGGATTTTAGGCCGGGCGCGGTGGCTCAAGCCTGTAATCCCAGCACTTTGGGAGGCCGAGACGGGTGGATCACCGTGTTCGCCAGGATGGTCT
629f72d9-13df-4382-89e3-a4901bbe75fd	Chr1	31001973	31001987	ALU	Alu_YRd4	0	269	-	-	N	CAACCACTGTATTTT	Hippocampus.Single.WGS.ON22212.Neuron-#16|2,Hippocampus.Single.WGS.ON22212.Neuron-#7|17,Hippocampus.Single.WGS.ON22213.Neuron-#15|5,Hippocampus.Single.WGS.ON22213.Neuron-#39|2,Liver.Bulk.WGS.ON22212|16,Liver.Bulk.WGS.ON22213|12,Hippocampus.Single.RC-seq.ON22212.Neuron-#16|1,Hippocampus.Single.RC-seq.ON22212.Neuron-#7|6,Hippocampus.Single.RC-seq.ON22213.Neuron-#39|1	Hippocampus.Single.WGS.ON22212.Neuron-#16|4,Hippocampus.Single.WGS.ON22212.Neuron-#21|1,Hippocampus.Single.WGS.ON22212.Neuron-#7|19,Hippocampus.Single.WGS.ON22213.Neuron-#15|6,Hippocampus.Single.WGS.ON22213.Neuron-#39|2,Liver.Bulk.WGS.ON22212|18,Liver.Bulk.WGS.ON22213|10,Hippocampus.Single.RC-seq.ON22212.Neuron-#16|1,Hippocampus.Single.RC-seq.ON22212.Neuron-#19|1,Hippocampus.Single.RC-seq.ON22212…	TAGAGATGGGGTTTCACCGTGTTAGCCAGGATGGTCTCGATCTCCTGACCTCGTGATCCACCCGTCTCGGCCTCCCAAAGTGCTGGGATTACAGGCTTGAGCCACCGCGCCCGGCCAACCACTGTATTTTATACATTGGAAACAAGACATAATTTTTGATTGAAAAACTATAAGGTCAAAACCC	TACTGTACTCCAGCCTGGGTAACAGATTGAGACTCTGCTTCAAAAAAAAAAAAGAAGAAGAAGAAGAATAAGAATGAAAATTCCACAAACAATGGGTCCTGTGGATCTCACCTACAACTAAACCTTAGGTTCAACCACGGTATTTTTTTTTTTTTTTTTTTTTTTATTGGGCTTGGGGGTTTTTCTCTGTCGCCCAGGCTGGGGGGCAGTGGCCGGATCTCCGCTCACTGCAAGCTCTCCCCCCTCCC	TGTCTTGTTTTCAATGTATAAAATACAGTGGTTGGCCGGGCGCGGTGGCTCAAGCCTGTAATCCCAGCACTTTGGGAGGCCGAGACGGGTGGATCACGAGGTCAGGAGATCGAGACCATCCTGGCTAACACGGTGAAACCCCATCTCTACTAAAAAATACAAAAAACTAGCCGGGCGAGGTGGCGGGCGCCTGTAGTCCCAGCTACTCAGGAGGCTGAGGCAGGAGAATGGCATAAACCCGGGAGGTGCGAGGAGCTTGCAGTGAGCTGAGATCCGGCCACTGCACCCCAGCCTGGGCGACAGAGCAAGACTCCGTCTCAAAAAAAAAAAAAAAAAAAATACAGTGGTTGAACCTAAGGTTTAGTTGTAGGTGAGATCCACAGGACCCATTGTTTGTGG…	TGTCTTGTTTTCAATGTATAAAATACAGTGGTTGGCCGGGCGCGGTGGCTCAAGCCTGTAATCCCAGCACTTTGGGAGGCCGAGACGGGTGGATCACGAGGTCAGGAGATCGAGACCATCCTGGCTAACACGGTGAAACCCCATCTCTACTAAAAAATACAAAAAACTAGCCGGGCGAGGTGGCGGGCGCCTGTAGTCCCAGCTACTCAGGAGGCTGAGGCAGGAGAATGGCATAAACCCGGGAGGTGCGAGGAGCTTGCAGTGAGCTGAGATCCGGCCACTGCACCCCAGCCTGGGCGACAGAGCAAGACTCCGTCTCAAAAAAAAAAAAAAAAAAAATACAGTGGTTGAACCTAAGGTTTAGTTGTAGGTGAGATCCACAGGACCCATTGTTTGTGG…
c7ec0b91-af36-4d2b-92a7-d866b433a162	Chr1	31947383	31947367	L1	L1_RS2	5446	6299	-	+	Y	AAGAAATGCTGTCATTT	Hippocampus.Single.WGS.ON22212.Neuron-#17|31,Hippocampus.Single.WGS.ON22212.Neuron-#19|6,Hippocampus.Single.WGS.ON22212.Neuron-#37|1,Hippocampus.Single.WGS.ON22212.Neuron-#7|5,Liver.Bulk.WGS.ON22212|18,Hippocampus.Single.RC-seq.ON22212.Neuron-#17|5,Hippocampus.Single.RC-seq.ON22212.Neuron-#7|3	Hippocampus.Single.WGS.ON22212.Neuron-#17|27,Hippocampus.Single.WGS.ON22212.Neuron-#19|3,Liver.Bulk.WGS.ON22212|14,Hippocampus.Single.RC-seq.ON22212.Neuron-#17|1	TTTTTTTTTTTTTTTTTTTTTTTTTTTTTAGGCTTTTTATTTTTATTTTTATTTTTTAATTTATTTATTATTATTATACTTTAAGTTGTAGGGTACATGTGCATAACGTGCAGGTTTGTTACATATGTATACTTGTGCCATGTTGCTGTGCTGCACCCATCAACTCGTCATTTACATCAGGTATAACTCCCAATGCAATCCCTCCCCCCTCCCCCCTCCCCATGATAGGCCCCGGTGTGTGATGTTCCCCTTCCTGAGTCCGAGTGATCTCATTGTTCAGTTCCCACCTATGAGTGAGAACATGCGGTGTTTGGTTTTCTGTTCTTGTGATAGTTTGCTAAGAATGATGGATTCCAGCTGCATCCAAGTCCCTACAAAGGACTCAAACTCATCACACCA…	CTTTACTCCCCGGCCCACCACCCTCAACTACACATTCAATAAAAAAATTTCACAACAACAAAAAAAACCAAACAACCCAAAACCATCACCACACCTAAAAAAAACCAAAACAAAAAAAAGAAATGCTGTCATTTATATGAAAAGCAGCACATTTTTGCTACTTCATGTTAAGAACTTAAATTCCAGCAAATCGTTTTAACAGAAAGATCTTAGAGTAAAAATTTTACCTATGCATCTGTTTATTCTTTTGAATATCCTTGTATA	TCACACCAGTTAGAATGGCAATCATTCAAAAGTCAGGAAACAACAGGTGCTGGAGAGGATGTGGAGAAATAGGAACACTTTTACACTGTTGGTGGGATTGTAAACTAGTTCAACCATTATGGAAAACAGTATGGCGATTCCTCAAGGATCTAGAACTAGATGTACCATATGACCCAGCCATCCCATTACTGGGTATATACCCAAAGGATTATAAATTATGCTCCTATAAAGACACATGCACACGTATGTTTATTACAGCACTATTCACAATAGCAAAGACTTGGAATCAACCCAAATGTCCATCAGTGACAGATTGGATTAAGAAAATGTGGCACATATACACCATGGAATACTATGCAGCCATAAAAAATGACAGCATTTCTTGTGTATCAGTAGGAA…	GATGAGTTTGAGTCCTTTGTAGGGACTTGGATGCAGCTGGAATCCATCATTCTTAGCAAACTATCACAAGAACAGAAAACCAAACACCGCATGTTCTCACTCATAGGTGGGAACTGAACAATGAGATCACTCGGACTCAGGAAGGGGAACATCACACACCGGGGCCTATCATGGGGAGGGGGGAGGGGGGAGGGATTGCATTGGGAGTTATACCTGATGTAAATGACGAGTTGATGGGTGCAGCACAGCAACATGGCACAAGTATACATATGTAACAAACCTGCACGTTATGCACATGTACCCTACAACTTAAAGTATAATAATAATAAATAAATTAAAAAATAAAAATAAAAATAAAAAGCCTAAAAAAAAAAAAAAAAAAAAAAAAAAAAAAAAAAA…
0ec40295-be19-4c5e-a15d-0f081b41f9ca	Chr1	31950837	31950850	ALU	Alu_YRa4	0	270	-	-	N	ACATGCAGCTGTTT	Hippocampus.Single.WGS.ON22212.Neuron-#10|1,Hippocampus.Single.WGS.ON22212.Neuron-#17|1,Hippocampus.Single.WGS.ON22212.Neuron-#19|1,Hippocampus.Single.WGS.ON22213.Neuron-#15|1,Hippocampus.Single.WGS.ON22213.Neuron-#69|5,Hippocampus.Single.WGS.ON22213.Neuron-#71|3,Hippocampus.Single.WGS.ON22213.Neuron-#23|3,Hippocampus.Single.WGS.ON22213.Neuron-#39|1,Liver.Bulk.WGS.ON22212|18,Liver.Bulk.WGS.ON2221…	Hippocampus.Single.WGS.ON22212.Neuron-#10|3,Hippocampus.Single.WGS.ON22212.Neuron-#17|3,Hippocampus.Single.WGS.ON22212.Neuron-#19|3,Hippocampus.Single.WGS.ON22213.Neuron-#15|1,Hippocampus.Single.WGS.ON22213.Neuron-#69|6,Hippocampus.Single.WGS.ON22213.Neuron-#71|2,Hippocampus.Single.WGS.ON22213.Neuron-#23|1,Hippocampus.Single.WGS.ON22213.Neuron-#52|2,Liver.Bulk.WGS.ON22212|18,Liver.Bulk.WGS.ON2221…	GATTCTTTAAACATTTGCTTATTTTCTTTTTATCTATGAGTTGTTTGAGACCTTTTCAAAATTTCTGGCCACTGACCTCAGCTATTCAAGTTAGCAACTATTTTTCAGCTTCCATTTGGTTATTTAGGATACAATTACATTGTATTCTTTACTCCTTTGTCATCAAAACCTCAAGTGACACTAACTTGAACATATATGGCCAAGAATACTTCTCTTAACAAGTTGTAAGCCTCCTCATCTTCCTCTCAGATCTCTACTCAAATGTCTATACAAAACAGCTGCATGTGCCGGGCGCGGTGGCTCAAGCCTGTAATCCCAGCATTTTGGGAGGCCGAGACGGGCGGATCATGAGGTCAGGAGATCGAGACCATCCTGGCTAAGCCAGTGAAACCCCGTCTC…	GATTCTTTAAACATTTGCTTATTTTCTTTTTATCTATGAGTTGTTTGAGACCTTTTCAAAATTTCTGGCCACTGACCTCAGCTATTCAAGTTAGCAACTATTTTTCAGCTTCCATTTGGTTATTTAGGATACAATTACATTGTATTCTTTACTCCTTTGTCATCAAAACCTCAAGTGACACTAACTTGAACATATATGGCCAAGAATACTTCTCTTAACAAGTTGTAAGCCTCCTCATCTTCCTCTCAGATCTCTACTCAAATGTCTATACAAAACAGCTGCATGTGCCGGGCGCGGTGGCTCAAGCCTGTAATCCCAGCATTTTGGGAGGCCGAGACGGGCGGATCATGAGGTCAGGAGATCGAGACCATCCTGGCTAAGCCAGTGAAACCCCGTCTC…	AGGCCGGGCGCGGTGGCTCAAGCCTGTAATCCCAGCATTTTGGGAGGCCGAGACGGGCGGATCATGAGGTCAGGAGATCGAGACCATCCTGGCTAAGCCAGTGAAACCCCGTCTCTACTAAAAAATACAAAAAATTAGCCGGGCGAGGTGGCGGGTGCCTGTAGTCCCAGCTACGCGGGAGACTGAGGCGGGAGAATGGCGTGAACCCGGGAGGTGGAGCTTGCAGTGAGCTGAGATCTGGCCACTGCACTCCAGCCTGGGCGACAGAGCGAGACTCCGTCTCAAATTAAA	AGGCCGGGCGCGGTGGCTCAAGCCTGTAATCCCAGCATTTTGGGAGGCCGAGACGGGCGGATCATGAGGTCAGGAGATCGAGACCATCCTGGCTAAGCCAGTGAAACCCCGTCTCTACTAAAAAATACAAAAAATTAGCCGGGCGAGGTGGCGGGTGCCTGTAGTCCCAGCTACGCGGGAGACTGAGGCGGGAGAATGGCGTGAACCCGGGAGGTGGAGCTTGCAGTGAGCTGAGATCTGGCCACTGCACTCCAGCCTGGGCGACAGAGCGAGACTCCGTCTCAAATTAAA
ffba7d95-4aff-4e8f-8c74-2860cfcf77ea	Chr1	32267286	32267276	ALU	Alu_YRa4	0	270	-	-	N	GAACTAATCTT	Hippocampus.Single.WGS.ON22213.Neuron-#14|3,Hippocampus.Single.WGS.ON22213.Neuron-#39|2,Liver.Bulk.WGS.ON22212|13,Liver.Bulk.WGS.ON22213|8,Hippocampus.Single.RC-seq.ON22212.Neuron-#21|1,Hippocampus.Single.RC-seq.ON22213.Neuron-#14|2,Hippocampus.Single.RC-seq.ON22213.Neuron-#25|1	Hippocampus.Single.WGS.ON22212.Neuron-#21|2,Hippocampus.Single.WGS.ON22213.Neuron-#14|8,Hippocampus.Single.WGS.ON22213.Neuron-#25|1,Liver.Bulk.WGS.ON22212|14,Liver.Bulk.WGS.ON22213|15,Hippocampus.Single.RC-seq.ON22212.Neuron-#21|3,Hippocampus.Single.RC-seq.ON22213.Neuron-#14|1	TTCCATTTGTTATACTACTTAGAGAAGTAGAAATGGTTATGGAATTAGACAATATTGATACTTAGCCATCCAGCTTAGTGGAGAACTACCGATATTTAGATGTAGGACAAAATTGTTTCCATAAAAGCAGTAAATGAACTAATCTTTTTTTTTTTTTTTTTTGTTTGATGACGGAGTCTCGCTCTATAGCCCAGGCTGGAGTGCAGGTGTTGGCCGGATCATCAGCTCACTGCAAGCTCCGCCTCCCGGGTTCACGCCATTCTCCGGCCTCAGC	CAAATGCACATGGCTCATAACTCAGGAAAGTAAAATTATGAAAATCCAGTCATACAAAAATTTGAAACCCAAGAAATTTTCTAGGTTGAGAAATGGAGCCTCAAAGCAGTTAAGTACTCTACCCAAAGTTAGGCATCTAACAAGTGATAGAATTCAGATTCAAATCCAGGTTTCTGAATACAAAGCCTATGCTCTTTTTATCCTTCAGAATAAAAATACGATCACTAAATACATTCTTTAAGATTAGTTCGGCCGGGCGCGGTGGCTCAAGCCTGTAATCCCAGCACTTTGGGAGGCCGAGATGGGCGGATCACGAGGTCAGGAGATCGAGACCATCCTGGCTAACACGGTGAAACCCCGTCTCTACTAAGAAATACAAAAAATAGCCGGGCGAGGTGG…	AGTTCGGCCGGGCGCGGTGGCTCAAGCCTGTAATCCCAGCACTTTGGGAGGCCGAGATGGGCGGATCACGAGGTCAGGAGATCGAGACCATCCTGGCTAACACGGTGAAACCCCGTCTCTACTAAGAAATACAAAAAATAGCCGGGCGAGGTGGCAGCGCCTGTAGTCCCAGCTACTCGGGAGGCTGAGGCCGGAGAATGGCGTGAACCCGGGAGGCGGAGCTTGCAGTGAGCTGAGATCCGGCCACTGCACTCCAGCCTGGGCTATAGAGCGAGACTCCGTCTCAAAAAAAAAAAAAAAAAGATTAGTTCATTTACTGCTTTTATGGAAACAATTTTGTCCTACATCTTTAAA	AGTTCGGCCGGGCGCGGTGGCTCAAGCCTGTAATCCCAGCACTTTGGGAGGCCGAGATGGGCGGATCACGAGGTCAGGAGATCGAGACCATCCTGGCTAACACGGTGAAACCCCGTCTCTACTAAGAAATACAAAAAATAGCCGGGCGAGGTGGCAGCGCCTGTAGTCCCAGCTACTCGGGAGGCTGAGGCCGGAGAATGGCGTGAACCCGGGAGGCGGAGCTTGCAGTGAGCTGAGATCCGGCCACTGCACTCCAGCCTGGGCTATAGAGCGAGACTCCGTCTCAAAAAAAAAAAAAAAAAGATTAGTTCATTTACTGCTTTTATGGAAACAATTTTGTCCTACATCTTTAAA
f4e1aeaa-c16d-416d-83a2-f5ab81bd50a0	Chr1	33364888	33364873	ALU	Alu_YRb4	0	257	+	+	N	AAAGAGACATGACAAA	Hippocampus.Single.WGS.ON22213.Neuron-#31|5,Hippocampus.Single.WGS.ON22213.Neuron-#38|1,Hippocampus.Single.WGS.ON22213.Neuron-#39|2,Liver.Bulk.WGS.ON22213|10,Hippocampus.Single.RC-seq.ON22213.Neuron-#31|3,Hippocampus.Single.RC-seq.ON22213.Neuron-#39|3	Hippocampus.Single.WGS.ON22213.Neuron-#31|9,Hippocampus.Single.WGS.ON22213.Neuron-#39|2,Liver.Bulk.WGS.ON22213|5,Hippocampus.Single.RC-seq.ON22213.Neuron-#31|4,Hippocampus.Single.RC-seq.ON22213.Neuron-#39|3	TAGATAATCTGAATCTTAGGCATAAGAAAACACAAGACAAATTCAAACTGAGGAACATCCTATAAAATAACTTATACTCTTCAAAAATGTTGATGTCATAAACTGAAAAACTGTACCAATTTAGAGGAGATTAAAGAGACATGACAAAGGCCGGGCGCGGTGGCTCACGCCTGTAATCCCAGCACTTTGGGAGGCCGAGGCGGGCGGATCACAAGGTCAGCGGAGTCGGGAGCACGGGGAAAACCCGTCTCTACTAAAAATACAAAAAA	GGGGAATGGCGGCAACCCGGGGGGCGGAGCTTGAAAGGGCCCGAGATCCCCCCACTGCACTCCAGCCTGGGAGAAAAAGCGAGACCCCCTCCAAAAAAAAAAAAAAAAAAAAAAAAAAAAAGAGACATGACAAATAAATGCAACAAGTCATTCAGAATGGTCCTGGACTAGAATTTTCTTTTCTATAAAGGACATTAGTTGGAATACATTGCTGAAATTTAAATTGTAAAGAATTTAAAATTAAAAATTTAAAGTTTTCTTTCGG	GATGTCATAAACTGAAAAACTGTACCAATTTAGAGGAGATTAAAGAGACATGACAAAGGCCGGGCGCGGTGGCTCACGCCTGTAATCCCAGCACTTTGGGAGGCCGAGGCGGGCGGATCACAAGGTCAGGAGATCGAGACCACGGTGAAACCCCGTCTCTACTAAAAATACAAAAAAAAATTAGCCGGGCGCGGTTGTGGGCGCCTGTAGTCCCAGCTGACTCGGGAGGCTGAGGCAGGAGAATGGCGTGAACCCGGGAGGCGGAGCTTGCAATGAGCCGAGATCGCGCCACTGCACTCCAGCCTGGGCGACAGAGCGAGACTCCGTCTCAAAAAAAAAAAAAAAAAAAAAAAAAAAAAAACATGTAAAAAAAAAAAATGAAACAATTCATTCAGATTG…	GATGTCATAAACTGAAAAACTGTACCAATTTAGAGGAGATTAAAGAGACATGACAAAGGCCGGGCGCGGTGGCTCACGCCTGTAATCCCAGCACTTTGGGAGGCCGAGGCGGGCGGATCACAAGGTCAGGAGATCGAGACCACGGTGAAACCCCGTCTCTACTAAAAATACAAAAAAAAATTAGCCGGGCGCGGTTGTGGGCGCCTGTAGTCCCAGCTGACTCGGGAGGCTGAGGCAGGAGAATGGCGTGAACCCGGGAGGCGGAGCTTGCAATGAGCCGAGATCGCGCCACTGCACTCCAGCCTGGGCGACAGAGCGAGACTCCGTCTCAAAAAAAAAAAAAAAAAAAAAAAAAAAAAAACATGTAAAAAAAAAAAATGAAACAATTCATTCAGATTG…
b64b3e4b-5c0c-45fb-92c2-2d9ad9ffc4f8	Chr1	35687259	35687243	ALU	Alu_YRb4	0	257	+	+	N	AGAAATTCGTTTATAGG	Hippocampus.Single.WGS.ON22213.Neuron-#10|1,Hippocampus.Single.WGS.ON22213.Neuron-#39|1,Hippocampus.Single.WGS.ON22213.Neuron-#47|1,Liver.Bulk.WGS.ON22213|17	Hippocampus.Single.WGS.ON22213.Neuron-#47|2,Liver.Bulk.WGS.ON22213|8,Hippocampus.Single.RC-seq.ON22213.Neuron-#47|1	TTATTTTCCTCTCTATTTTGTTTTTTATGTATCATGTACTTTGTACAAATAATAGACTTTTTGTATAATATATGAGTCATTCAGATTTATCATGTACCCTAATCTTAGAAATTTGAATTTGAAGAGACCTTTTAAAATAGATAATTGACAAGTCTATTAATATGATGCTGCAGTTTTCACATTTGGATTTGTTGAGCTGTCTCCTAACCAACCTCTTCAAGAACTCCCAAAGTTTATGGATTAATTTAATCAGCCCTTTCTTTGGTATTGATAGCAGAAATTCGTTTATAGGCCGGGCGCGGTGGCTCACGCCTGTAATCCCAGCACTTTGGGAGGCTGAGGCGGGCGGATCACAAGGTCAGGAGATCGAGACCACGGTGAAACCCCGTCTCTACTAAA…	TGGCGTGAACCCGGGCGGCGGAGCTTGCAGTGAGCCGAGATCGCGCCACTGCACCCCCGCCTGGGCTGGGCGACAGTGCGACACTCCGTCAAAAAAAAAAAAAAAAAAAAAAAAAAAAAAGAAATTCGTTTATAGGAATCCGACTATTTCACACTCTGAAGCTGAAACCAATTGGTCTTGTTTATATCTAGTAAATACTAGCAAGGAGCAAGGAACTGGCCTCAGCATAGCCAGGCTGTGACTAATTGTAGTCTCAGTGAAA	GGATTTGTTGAGCTGTCTCCTAACCAACCTCTTCAAGAACTCCCAAAGTTTATGGATTAATTTAATCAGCCCTTTCTTTGGTATTGATAGCAGAAATTCGTTTATAGGCCGGGCGCGGTGGCTCACGCCTGTAATCCCAGCACTTTGGGAGGCTGAGGCGGGCGGATCACAAGGTCAGGAGATCGAGACCACGGTGAAACCCCGTCTCTACTAAAAATACAAAAAATTAGCCGGGCGCGGTTGTGGGCGCCTGTAGTCCCAGCTACTCGGGAGGCTGAGGCAGGAGAATGGCGTGAACCCGGGAGGCTGAGCTTGCAGTGAGCCGAGATCGCGCCACTGCACTCCAGCCTGGGCTGGGCGACAGAGCGAGACTCCGTCTCAAAAAAAAAAAAAAAAAAA…	GGATTTGTTGAGCTGTCTCCTAACCAACCTCTTCAAGAACTCCCAAAGTTTATGGATTAATTTAATCAGCCCTTTCTTTGGTATTGATAGCAGAAATTCGTTTATAGGCCGGGCGCGGTGGCTCACGCCTGTAATCCCAGCACTTTGGGAGGCTGAGGCGGGCGGATCACAAGGTCAGGAGATCGAGACCACGGTGAAACCCCGTCTCTACTAAAAATACAAAAAATTAGCCGGGCGCGGTTGTGGGCGCCTGTAGTCCCAGCTACTCGGGAGGCTGAGGCAGGAGAATGGCGTGAACCCGGGAGGCTGAGCTTGCAGTGAGCCGAGATCGCGCCACTGCACTCCAGCCTGGGCTGGGCGACAGAGCGAGACTCCGTCTCAAAAAAAAAAAAAAAAAAA…
063e30a8-bc69-49c1-b51a-1b8f6bd5ef0d	Chr1	38271631	38271637	ALU	Alu_YRa4	0	270	+	+	N	AAAAAAA	Hippocampus.Single.WGS.ON22212.Neuron-#21|1,Hippocampus.Single.WGS.ON22212.Neuron-#7|4,Hippocampus.Single.WGS.ON22213.Neuron-#25|1,Hippocampus.Single.WGS.ON22213.Neuron-#52|3,Hippocampus.Single.WGS.ON22213.Neuron-#49|2,Liver.Bulk.WGS.ON22212|10,Liver.Bulk.WGS.ON22213|12,Hippocampus.Single.RC-seq.ON22213.Neuron-#25|2	Hippocampus.Single.WGS.ON22212.Neuron-#21|4,Hippocampus.Single.WGS.ON22213.Neuron-#25|2,Hippocampus.Single.WGS.ON22213.Neuron-#52|5,Hippocampus.Single.WGS.ON22213.Neuron-#49|6,Liver.Bulk.WGS.ON22212|14,Liver.Bulk.WGS.ON22213|10,Hippocampus.Single.RC-seq.ON22212.Neuron-#21|1,Hippocampus.Single.RC-seq.ON22213.Neuron-#69|1,Hippocampus.Single.RC-seq.ON22213.Neuron-#31|1,Hippocampus.Single.RC-seq.ON22…	TAGTCCCAGCTACTCAGGACGATGAGGATGTAGCATGGCGGTAACCAGGGAGTGGGATATTGCATTTATCCGAGATCGCGCCTCTGCTCTCATGCCTGGGCAAATTCTTTAGACTCCTTCTCAAAAAAAAAAAAAAAAAAATTAGCTAGGCATGGTGAAACCTCCCTGTAGTCCCAGCTGCTCAGCAGGCTGAGGCTGGAGGATCACTTGAGCCCAGGAGGTCAAGGAGGAAGTGAACTGTGTTTGTGCCACAGCACCCTAGCCATTGT	GCTGGAGTGAGTAAAGTGATTTGCCAAAAGAAACCCTGAAACCAGTGATAAACCTCATGTCTTGACACAAATGTTCAACATCACTCATCATTAGGGAAATGAAAATTAAGATCACAATGAGCTATCACTGCATATATCTAAGAACAGCTAAAATAAAAGAAGGCTGGGGCAGTGGCTCACACCTACAATCCCTGCACTTTGATAGGCTCAGGTGGGAGGATCACTTGAGTCCAGCAGTTCAGAATCAGCCTAAGGAACACAGTGAGGCTCTGATTCTATTAAAGAAAAAAAGGCCGGGCGCGGTGGCTCAAGCCTGTAATCCCAGCACTTTGGGAGGCCGAGGCGGGCGGATCACAAGGTCAGGAGATCGAGACCACAGTGAAACCCCGTCTCTACTAA…	GCACTTTGATAGGCTCAGGTGGGAGGATCACTTGAGTCCAGCAGTTAAGAATCAGCCTAAGGAACACAGTGAGGCTCTGATTATATTAAAGAAAAAAAGGCCGGGCGCGGTGGCTCAAGCCTGTAATCCCAGCACTTTGGGAGGCCGAGGCGGGCGGATCACAAGGTCAGGAGATCGAGACCACAGTGAAACCCCGTCTCTACTAAAAATACAAAAAATTAGCCGGGCGCGGTGGCGGGCGCCGGTAGTCCCAGCTACTCAGGAGGCTGAGGCAGGAGAATGGCGGGAACCCGGGAGGCGGAGCTTGCAGTGAGCCGAGATCGCGCCACTGCACTCCAGCCTGGGCAACAGCGTGAGACTCCGTCTCGAAAAAAAAAAAAAAAAAATTAGCAGAGGAAG…	GCACTTTGATAGGCTCAGGTGGGAGGATCACTTGAGTCCAGCAGTTAAGAATCAGCCTAAGGAACACAGTGAGGCTCTGATTATATTAAAGAAAAAAAGGCCGGGCGCGGTGGCTCAAGCCTGTAATCCCAGCACTTTGGGAGGCCGAGGCGGGCGGATCACAAGGTCAGGAGATCGAGACCACAGTGAAACCCCGTCTCTACTAAAAATACAAAAAATTAGCCGGGCGCGGTGGCGGGCGCCGGTAGTCCCAGCTACTCAGGAGGCTGAGGCAGGAGAATGGCGGGAACCCGGGAGGCGGAGCTTGCAGTGAGCCGAGATCGCGCCACTGCACTCCAGCCTGGGCAACAGCGTGAGACTCCGTCTCGAAAAAAAAAAAAAAAAAATTAGCAGAGGAAG…
772b1ae4-a0c2-4032-80ea-32f25c0ec3cb	Chr1	39387861	39387875	ALU	Alu_YRb4	0	258	+	+	N	AAAAGAAGCATAATA	Hippocampus.Single.WGS.ON22212.Neuron-#37|7,Liver.Bulk.WGS.ON22212|16	Hippocampus.Single.WGS.ON22212.Neuron-#37|4,Liver.Bulk.WGS.ON22212|22	CCCGGGGTGGCGGTCATTGCCCGGCGCCGAGACCGCGCCCCACCCCACCAGCCGGGGCAACTGTCCCACACCCCGCAACAAAAAAAAAAAAAAAAAAAAAAAAAAACCAAAAAAAAAGAAGCATAATATTTCAAAATATATGAATATTAAATGAAATTTAAATTTTAGGTTCATAAATAAATTTCATCGGAATGTGGCCATACTCATTCATTCACATATTGTCCATGGCTATTTTTTTTCCTGTGCTTTTTTTGTTTG	TTTTTTTTTGAGACGGAGTCTCGCTCTGTCGCCCAGGCTGGAGTGCAGTGGCGCGATCTCGGCTCACTGCAAGCTCCGCCTCCCGGGTTCACGCCATTCTCCTGCCTCAGCCTCCCGAGTAGCTGGGACTACAGGCGCCCACAACCGCGCCCGGCTAATTTTTTGTATTTTTAGTAGAGACGGGGTTTCACCGTGGTCTCGATCTCCTGACCTTGTGATCCGCCCGCCTCGGCCTCCCAAAGTGCTGGGATTACAGGCGTGAGCCACCGCGCCCGGCTATTATGCTTCTTTTGACTTGGCCCATGAGCCATAGTTTTCAGATCCCTACCCTATTGCAGTGCTGTCTAGTAGAGTAATCACGGTTGACTCCTGAGCACCTGAAATGTGGCTATCTGAATT…	CCACATTTCAGGTGCTCAGGAGTCAACCGAGATTACTCTACTAGACAGCACTGCAATAGGGTAGGGATCTGAAAACTATGGCTCATGGGCCAAGTAAAAAGAAGCATAATAGCCGGGCGCGGTGGCTCACGCCTGTAATCCCAGCACTTTGGGAGGCCGAGGCGGGCGGATCACAAGGTCAGGAGATCGAGACCACGGTGAAACCCCGTCTCTACTAAAAATACAAAAAATTAGCCGGGCGCGGTTGTGGGCGCCTGTAGTCCCAGCTACTCGGGAGGCTGAGGCAGGAGAATGGCGTGAACCCGGGAGGCGGAGCTTGCAGTGAGCCGAGTTCGCGCCACTGCACTCCAGCCTGGGCGACAGAGCGAGACTCCGTCTCAAAAAAAAAAAAAAAAAAAA…	CCACATTTCAGGTGCTCAGGAGTCAACCGAGATTACTCTACTAGACAGCACTGCAATAGGGTAGGGATCTGAAAACTATGGCTCATGGGCCAAGTAAAAAGAAGCATAATAGCCGGGCGCGGTGGCTCACGCCTGTAATCCCAGCACTTTGGGAGGCCGAGGCGGGCGGATCACAAGGTCAGGAGATCGAGACCACGGTGAAACCCCGTCTCTACTAAAAATACAAAAAATTAGCCGGGCGCGGTTGTGGGCGCCTGTAGTCCCAGCTACTCGGGAGGCTGAGGCAGGAGAATGGCGTGAACCCGGGAGGCGGAGCTTGCAGTGAGCCGAGTTCGCGCCACTGCACTCCAGCCTGGGCGACAGAGCGAGACTCCGTCTCAAAAAAAAAAAAAAAAAAAA…
ce953915-34d9-4ea5-94c8-52cc385002fb	Chr1	39694689	39694673	ALU	Alu_YRb4	0	257	-	-	N	AGGCTCCTCATTTTCTT	Hippocampus.Single.WGS.ON22212.Neuron-#19|12,Hippocampus.Single.WGS.ON22212.Neuron-#37|9,Liver.Bulk.WGS.ON22212|27,Hippocampus.Single.RC-seq.ON22212.Neuron-#19|3	Hippocampus.Single.WGS.ON22212.Neuron-#10|2,Hippocampus.Single.WGS.ON22212.Neuron-#17|1,Hippocampus.Single.WGS.ON22212.Neuron-#19|9,Liver.Bulk.WGS.ON22212|10,Hippocampus.Single.RC-seq.ON22212.Neuron-#17|1,Hippocampus.Single.RC-seq.ON22212.Neuron-#19|9	CTGAAGTGATCCGCCCACCTTGGCCTCCCAAAGTGCTGGGATTACAGGTGTGAGCCACCACGCCTGGCCTAATAACTTGTTTTAAAACATCCACCTAGAAAATGGCCAAACCAGGTCTCAAACACAGTCAGGCTCCTCATTTTCTTTCTTTTTTTTTTTTTTTTTTTTTGAGTGACGGAGTCTCGCTCTGTCACCCAGGCTGGGCGCGGTGGCGCGGTCTTGGCTCACTGCAAGCTCACCGCCTCCCGGGTTCAC	CTTCCTCACAACGCATGATCATTCCTCTCCTACTCTATCCCCTCCCCCGCCCCCAGCTCGCCCCCCCCCCCCCCCGCCACCCCACCGGGCCCGCCCTCCCCCCCCCCCCCCCCGCGCCCGGCCTAGGCTCCTCATTTTCTTAATCACTAACCCATAATGTCTCCGGGGGCCTGGACCAGGAGGAATTCTAACTTCACCCACACCCTTGAGAAAGTACAGCTTTCTGGCTTCCTCGAACCCCCTTCCTCGCTTCTGCCTTCTCAGAATCTGGACTG	GAGCCTAGGCCGGGCGCGGTGGCTCACGCCTGTAATCCCAGCACTTTGGGAGACCGAGGCGGGCGGATCACAAGGTCAGGAGATCGAGACCACGGTGAAACCCCGTCTCTACTAAAAATACAAAAAATTAGCCGGGCGCGGTTGTGGGCGCCTGTAGTCACCAGCTACTCGGGAGGCTGAGGCAGGAGAATGGCGTGAACCCGGGAGGCGGAGCTTGCAGTGAGCCAAGATCGCGCCACTGCACTCCAGCCTGGGTGACAGAGCGAGACTCCGTCTCAAAAAAAAAAAAAAAAAGAAAGAAAGAAAATGAGGAGCCTGACTGTGTTTTAGACCTGGTTTGGCCATTTTCTAGGTGGATGTTTTAAAACACAGTTATTAGGCCAGGCGTGGTGGCTCACA…	GAGCCTAGGCCGGGCGCGGTGGCTCACGCCTGTAATCCCAGCACTTTGGGAGACCGAGGCGGGCGGATCACAAGGTCAGGAGATCGAGACCACGGTGAAACCCCGTCTCTACTAAAAATACAAAAAATTAGCCGGGCGCGGTTGTGGGCGCCTGTAGTCACCAGCTACTCGGGAGGCTGAGGCAGGAGAATGGCGTGAACCCGGGAGGCGGAGCTTGCAGTGAGCCAAGATCGCGCCACTGCACTCCAGCCTGGGTGACAGAGCGAGACTCCGTCTCAAAAAAAAAAAAAAAAAGAAAGAAAGAAAATGAGGAGCCTGACTGTGTTTTAGACCTGGTTTGGCCATTTTCTAGGTGGATGTTTTAAAACACAGTTATTAGGCCAGGCGTGGTGGCTCACA…
6485ffdb-5ee4-4372-98ad-a66f5dd337ff	Chr1	40374958	40374971	ALU	Alu_YRb4	0	257	-	-	N	GCCAGGATGGTCTT	Hippocampus.Single.WGS.ON22212.Neuron-#17|1,Hippocampus.Single.WGS.ON22212.Neuron-#19|8,Hippocampus.Single.WGS.ON22212.Neuron-#37|1,Hippocampus.Single.WGS.ON22213.Neuron-#15|18,Hippocampus.Single.WGS.ON22213.Neuron-#71|1,Hippocampus.Single.WGS.ON22213.Neuron-#38|1,Hippocampus.Single.WGS.ON22213.Neuron-#49|2,Liver.Bulk.WGS.ON22212|15,Liver.Bulk.WGS.ON22213|15,Hippocampus.Single.RC-seq.ON22212.Neur…	Hippocampus.Single.WGS.ON22212.Neuron-#19|7,Hippocampus.Single.WGS.ON22212.Neuron-#37|1,Hippocampus.Single.WGS.ON22212.Neuron-#7|2,Hippocampus.Single.WGS.ON22213.Neuron-#14|1,Hippocampus.Single.WGS.ON22213.Neuron-#15|16,Hippocampus.Single.WGS.ON22213.Neuron-#31|1,Hippocampus.Single.WGS.ON22213.Neuron-#38|1,Liver.Bulk.WGS.ON22212|14,Liver.Bulk.WGS.ON22213|8,Hippocampus.Single.RC-seq.ON22212.Neuron…	TTTTAGTAGAGACGGGGTTTCACCGTGGTCTCGATCTCCTGACCTTGTGATCCGCCCACCTCGGCCTCCCAAAGCGCTGGGATTACAGGCGTGAGCCACCGCGCCCGGCCGCCAGGATGGTCTTGATCTCCTGACCTCGTGATTTGCCCACCTCGGCCTTCCCCAAAGTGCTGGGGTTACAGGCATGAGCCGCTGCGCCCAGCCAAAAAATTTTTACATTATCAAATAATTGAGTAACCCTCCAAGCAGGACCACCATACACA	ATTGCAACCTCCGCCTCCTGGGTTCAAGTGGTTCTCCTGCCTCAGCCTCCCAAGTACCTGGGACTACAGGCACATGCCCACCCTGCCCGGGTAATTTTTTGTATTTTGAGTAGAGATGGCGGTTCGCCGTGTTAGCCAGGATGGTCTTTTTTTTTTTTTTTTTTTTTTTTTTTTGGGAGATACCGAGTATCGACTCTGTCTGCCCAGGCTGGGGTGCAGTGGCGGCGATCTCACGGCGCAC	CCTGTAATCCCAGCACTTTGGGAGGCCGAGGTGGGCAAATCACGAGGTCAGGAGATCAAGACCATCCTGGCGGCCGGGCGCGGTGGCTCACGCCTGTAATCCCAGCGCTTTGGGAGGCCGAGGTGGGCGGATCACAAGGTCAGGAGATCGAGACCACGGTGAAACCCCGTCTCTACTCAAAATACAAAAAATTAGCCAGGCGCGGTTGTGGGCGCCTGTAGTCCCAGCTCAAACTC	CCTGTAATCCCAGCACTTTGGGAGGCCGAGGTGGGCAAATCACGAGGTCAGGAGATCAAGACCATCCTGGCGGCCGGGCGCGGTGGCTCACGCCTGTAATCCCAGCGCTTTGGGAGGCCGAGGTGGGCGGATCACAAGGTCAGGAGATCGAGACCACGGTGAAACCCCGTCTCTACTCAAAATACAAAAAATTAGCCAGGCGCGGTTGTGGGCGCCTGTAGTCCCAGCTCAAACTC
a9371e0a-68ba-4a91-b81a-3b5896fb6c8a	Chr1	40749872	40749856	ALU	Alu_YRd4	0	270	-	-	N	CATGTGTTACATTCTTT	Hippocampus.Single.WGS.ON22212.Neuron-#16|3,Hippocampus.Single.WGS.ON22212.Neuron-#7|1,Liver.Bulk.WGS.ON22212|13,Hippocampus.Single.RC-seq.ON22212.Neuron-#16|3	Hippocampus.Single.WGS.ON22212.Neuron-#16|1,Hippocampus.Single.WGS.ON22212.Neuron-#7|2,Liver.Bulk.WGS.ON22212|12,Hippocampus.Single.RC-seq.ON22212.Neuron-#16|2	CCACCCACCTTGGCCTCCCAAAGTGCTGGGATTACAGGCTTGAGCCACCATGCCCGGCCAAGGTTTTTTTCTTTTTAACCCTAATTATTTTTCCTTTTGATACAGTACATGAGTGTTCACAGTATCTTTCACATGTGTTACATTCTTTTTTTTTTTTTTTTTTTTTTTTTTTTTTGAGACGGAGTCTCGCTGTGTATCACCGGCTGGTTTGCAGTGGCGTGTTAACGGCTAACAGCAAGCA	TTTTTTAGTAGAGACGGGGTTTCACCGTGTTAGCCAGGATAGTCTCGATCTCCTGACCCCGTGATCCGCCCGCCTCGGCCTCCCAAAGTGCTGGGATTACAGGCTTGAGCCACCGCGCCCGGCCATGTGTTACATTCTTTCACATGTGTTACATGTTTTCACTGACAGAATCCTGCAAAATAAGCATAATTAACCCTCACTTTTCATACCGTAAAGTGAAGCTCAAAAATAAAAAGTTCAAACAACAGAGTTAGACAGGGCTTGAATTTTA	AAAGAATGTAACACATGGCCGGGCGCGGTGGCTCAAGCCTGTAATCCCAGCACTTTGGGAGGCCGAGGCGGGCGGATCACGAGGTCAGGAGATCGAGACTATCCTGGCTAACATGGTGAAACCCCGTCTCTACTAAAAATACAAAAAACTAGCCGGGCGTGGTGGCGGGCGCCTGTAGTCTCAGCTACTTGGGAGGCTGAGGCGGGAGAATGGCGTGAACCCGGGAGGCGGAGCTTGCAGTGAGCCGAGATCACGCCACTGCACTCCAGCCTGGGAGACACAGCGAGACTCCGTCTCAAAAAAAAAAAAAAAAAAAAAAAAAAAAAAAAAAAGAAAAAAAAGGGAAAAAAAATGTGAACACCCACTTACTTATTCAAAA	AAAGAATGTAACACATGGCCGGGCGCGGTGGCTCAAGCCTGTAATCCCAGCACTTTGGGAGGCCGAGGCGGGCGGATCACGAGGTCAGGAGATCGAGACTATCCTGGCTAACATGGTGAAACCCCGTCTCTACTAAAAATACAAAAAACTAGCCGGGCGTGGTGGCGGGCGCCTGTAGTCTCAGCTACTTGGGAGGCTGAGGCGGGAGAATGGCGTGAACCCGGGAGGCGGAGCTTGCAGTGAGCCGAGATCACGCCACTGCACTCCAGCCTGGGAGACACAGCGAGACTCCGTCTCAAAAAAAAAAAAAAAAAAAAAAAAAAAAAAAAAAAGAAAAAAAAGGGAAAAAAAATGTGAACACCCACTTACTTATTCAAAA
3e2d8762-f887-4a50-99cf-5b34e5bc1435	Chr1	40987956	40987942	ALU	Alu_YRd4	0	269	+	+	N	TGGTAGAAAAGGTAG	Hippocampus.Single.WGS.ON22213.Neuron-#71|9,Hippocampus.Single.WGS.ON22213.Neuron-#25|1,Hippocampus.Single.WGS.ON22213.Neuron-#31|4,Hippocampus.Single.WGS.ON22213.Neuron-#38|8,Liver.Bulk.WGS.ON22213|11,Hippocampus.Single.RC-seq.ON22213.Neuron-#15|2,Hippocampus.Single.RC-seq.ON22213.Neuron-#71|1,Hippocampus.Single.RC-seq.ON22213.Neuron-#25|1,Hippocampus.Single.RC-seq.ON22213.Neuron-#31|2,Hippocamp…	Hippocampus.Single.WGS.ON22213.Neuron-#10|1,Hippocampus.Single.WGS.ON22213.Neuron-#15|3,Hippocampus.Single.WGS.ON22213.Neuron-#71|5,Hippocampus.Single.WGS.ON22213.Neuron-#25|3,Hippocampus.Single.WGS.ON22213.Neuron-#31|6,Hippocampus.Single.WGS.ON22213.Neuron-#38|6,Liver.Bulk.WGS.ON22213|7,Hippocampus.Single.RC-seq.ON22213.Neuron-#38|2	TTAATAGTGTTCATTTATTTAGCTCTTGAAGGGCAGGGCAGAGGAAGTGTGATAGGCAGGCATTAGAGAATGTGGAGGAGCTGACAAAACAGAATATGAAGGGAGGTAGAAGAAACTGACTCTCAGCTTTGGTAGAAAAGGTAGCACAAAGGCCAGGCGCGGTGGCTCAAGCCTGTAATCCCAGCACTTTGGGAGGCCGAGACGGGTGGATCACAAGGTCAGGAGATCGAGACCATCCTGGCTAACCCGGTGAAACCCCGTCTCTACTAAAAA	CCCGGGTTGGGGAGCTTGCTTTTCGCTTTTCTCCGGCCACTTCACCACACCCTTGGTTACCTCCTCCTACCCACAAAAAAAAAAAAAAAAAAAAAAAAAAAAAAAAAAAAAAAAAAAGAAAAGGTAGCACAGATAAGGAAGCACAAATTTCAGATAACCCTCTTGGCCTTTCCCTGATACCTTATTGCGGAGAGTTCGTGTTTCTCCTTAAGCATTAAAGTTAGAAAGCCAAATAGTAATAGATGGCCACAATTCTGTGAAAATT	GCATTAGAGACTGTGGAGGAGCTGACAAAACAGAATATGAAGGGAGGTAGAAGAAACTGACTCTCAGCTTTGGTAGAAAAGGTAGCACAAAGGCCAGGCGCGGTGGCTCAAGCCTGTAATCCCAGCACTTTGGGAGGCCGAGACGGGTGGATCACAAGGTCAGGAGATCGAGACCATCCTGGCTAACCCGGTGAAACCCCGTCTCTACTAAAAAATACAAAAAACTAGCCGGGCGGGAGG	GCATTAGAGACTGTGGAGGAGCTGACAAAACAGAATATGAAGGGAGGTAGAAGAAACTGACTCTCAGCTTTGGTAGAAAAGGTAGCACAAAGGCCAGGCGCGGTGGCTCAAGCCTGTAATCCCAGCACTTTGGGAGGCCGAGACGGGTGGATCACAAGGTCAGGAGATCGAGACCATCCTGGCTAACCCGGTGAAACCCCGTCTCTACTAAAAAATACAAAAAACTAGCCGGGCGGGAGG
0b6e57c9-5b63-4386-b909-f95087af2ba1	Chr1	41483767	41483753	ALU	Alu_YRa4	0	270	+	+	N	AAGAATACTGTTCTT	Hippocampus.Single.WGS.ON22213.Neuron-#31|8,Hippocampus.Single.WGS.ON22213.Neuron-#39|4,Liver.Bulk.WGS.ON22213|8,Hippocampus.Single.RC-seq.ON22212.Neuron-#7|1,Hippocampus.Single.RC-seq.ON22213.Neuron-#71|2,Hippocampus.Single.RC-seq.ON22213.Neuron-#31|9,Hippocampus.Single.RC-seq.ON22213.Neuron-#39|1	Hippocampus.Single.WGS.ON22213.Neuron-#10|1,Hippocampus.Single.WGS.ON22213.Neuron-#71|1,Hippocampus.Single.WGS.ON22213.Neuron-#31|15,Hippocampus.Single.WGS.ON22213.Neuron-#39|2,Liver.Bulk.WGS.ON22213|13,Hippocampus.Single.RC-seq.ON22213.Neuron-#31|3	AAAGAACAGTATTCTTTTTTTTTTTTTTTTGAGAGGGAGTCTTGCTCTGTGCCCCAGGCTGGAGTGCAGTGGCGCGATCTCGGCTCACTGCAAGCTCCGCCCCGCCGGTTTCACACCATTCTCCTGCCTCAGCCTCCCAAGTAGCTGGGACTACAGGCGCCCGCCACCTCGCCCGGCTAATTTTCTTGTATTTTTAGTAGAGACGGGGTTTCACCGTGTTAGCCAGGATGGTCTCGATCTCCTGACCTCGTGATCCGCCCGTCTCGGCCTCCCAAAGTGCTGGGATTACAGGCTTGAGCCACCGCGCCCGGCCAAGAACAGTATTCTTATCATGAGGAACACCCCTCAATCCCATCATGACTTCATCAAAACCTAATTACCCCAAAAGACCCCATTTCC…	AGGCAGGAGAATGGTGTGAAACCGGCGGGGCGGAGCTTGCAGTGAGCCGAGATCGCGCCACTGCACTCCAGCCTGGGGCACAGAGCAAGACTCCCTCTCAAAAAAAAAAAAAAAAGAATACTGTTCTTTAAGAGGAGATACCAGAGAGCTTGTGCATGTACCCTCTCTCTTTCCACCATGTGAGAACACAGCAAGAAGGCAGCAGTCTGCAAGCCAGGAAGAGAGCCCTCACTAGAACCCAAAGATGTTGGCATCTTGAT	ATTTGGAAATGGGGTCTTTTGGGGTAATTAGGTTTTGATGAAGTCATGATGGGATTGAGGGGTGTTCCTCATGATAAGAATACTGTTCTTGGCCGGGCGCGGTGGCTCAAGCCTGTAATCCCAGCACTTTGGGAGGCCGAGACGGGCGGATCACGAGGTCAGGAGATCGAGACCATCCTGGCTAACACGGTGAAACCCCGTCTCTACTAAAAATACAAGAAAATTAGCCGGGCGAGGTGGCGGGCGCCTGTAGTCCCAGCTACTTGGGAGGCTGAGGCAGGAGAATGGTGTGAAACCGGCGGGGCGGAGCTTGCAGTGAGCCGAGATCGCGCCACTGCACTCCAGCCTGGGGCACAGAGCAAGACTCCCTCTCAATTAAAAAAAAAAAAGAATACTGTT…	ATTTGGAAATGGGGTCTTTTGGGGTAATTAGGTTTTGATGAAGTCATGATGGGATTGAGGGGTGTTCCTCATGATAAGAATACTGTTCTTGGCCGGGCGCGGTGGCTCAAGCCTGTAATCCCAGCACTTTGGGAGGCCGAGACGGGCGGATCACGAGGTCAGGAGATCGAGACCATCCTGGCTAACACGGTGAAACCCCGTCTCTACTAAAAATACAAGAAAATTAGCCGGGCGAGGTGGCGGGCGCCTGTAGTCCCAGCTACTTGGGAGGCTGAGGCAGGAGAATGGTGTGAAACCGGCGGGGCGGAGCTTGCAGTGAGCCGAGATCGCGCCACTGCACTCCAGCCTGGGGCACAGAGCAAGACTCCCTCTCAATTAAAAAAAAAAAAGAATACTGTT…
60f2ee9b-4d5f-4759-bd11-87d9d9285a3e	Chr1	42116810	42116826	ALU	Alu_YRa4	0	269	+	+	N	AGAAGTCATTGCTTTTG	Hippocampus.Single.WGS.ON22212.Neuron-#16|1,Hippocampus.Single.WGS.ON22212.Neuron-#17|1,Hippocampus.Single.WGS.ON22212.Neuron-#19|11,Hippocampus.Single.WGS.ON22212.Neuron-#7|2,Liver.Bulk.WGS.ON22212|12,Hippocampus.Single.RC-seq.ON22212.Neuron-#16|1,Hippocampus.Single.RC-seq.ON22212.Neuron-#19|1,Hippocampus.Single.RC-seq.ON22212.Neuron-#7|1	Hippocampus.Single.WGS.ON22212.Neuron-#16|1,Hippocampus.Single.WGS.ON22212.Neuron-#17|1,Hippocampus.Single.WGS.ON22212.Neuron-#19|15,Hippocampus.Single.WGS.ON22212.Neuron-#7|1,Liver.Bulk.WGS.ON22212|13,Hippocampus.Single.RC-seq.ON22212.Neuron-#19|3	CACCCCCGGCGGCCCGCTGCGGCCCGGCCCCCCCATCCCCCCACCCCCCAACCCCCGTGGGCCCCACCCCCCAACCCCTCAAAAAAAAAAAAAAAAAAAAAAAAAAAAAAAAAAAAAAAAAGAAGTCATTGCTTTTGTTCATCCTCAGACGTTGTGGAAAAAAATTGTTCCATTAGTATAAAAAAACAAAAACTGAATATTATTTATGGAATAGCATCATGAAAATTGATGTGTTATTTTATGAAAATATTTTGTATCTTAAAAATAC	TCATTGTGTTAGCCAGGATGGTCTCGATCTCCTGACCTTGTGATCCGCCCGTCTCGGCCTCCCAAAGTGCTGGGATTACAGGCTTGAGCCACCGCGCCCGGCCAAAAGCAATGACTTCTAAGTCTCAATTATACAATTTTAGGAAGCTAATTTTATAATATTTTGAATTTTTTGCATGTTTACAAAATTAATTTTTGTTTTACCCTGAAAGTTTGAGGTAGATCTGCCCCCCTTTCCCTCCTCCGCCCACAGTGCTATATTTAGCATGCTTCCTCCCACCTGCCTACAGCTTTGCATACCCTAAAATGCATACCCTCCTTTTCATTCCTTCTGTCTACAATCTAGGCCAATTATTAGTCCTATGGCTTTGATTCCAAC	TCAAACTTTAAGGGTAAAACAAAAATTAATTTTGTAAACATGCAAAAAATTCAAAATATAATAAAATTAGCTTCCTAAAATTGTATAATTGAGACTTAGAATACATTGCTTTTGGCCGGGCGCGGTGGCTCAAGCCTGTAATCCAAGCACTTTGGGAGGCCGAGACGGGCGGATCAATCAG	TCAAACTTTAAGGGTAAAACAAAAATTAATTTTGTAAACATGCAAAAAATTCAAAATATAATAAAATTAGCTTCCTAAAATTGTATAATTGAGACTTAGAATACATTGCTTTTGGCCGGGCGCGGTGGCTCAAGCCTGTAATCCAAGCACTTTGGGAGGCCGAGACGGGCGGATCAATCAG
c5b02682-c53e-4b87-92a1-d60516cd1ddd	Chr1	42375029	42375016	ALU	Alu_YRb4	0	257	+	+	N	AAAAAGTTATTGTG	Hippocampus.Single.WGS.ON22213.Neuron-#69|5,Hippocampus.Single.WGS.ON22213.Neuron-#25|6,Hippocampus.Single.WGS.ON22213.Neuron-#39|3,Liver.Bulk.WGS.ON22213|14,Hippocampus.Single.RC-seq.ON22213.Neuron-#69|2,Hippocampus.Single.RC-seq.ON22213.Neuron-#25|1	Hippocampus.Single.WGS.ON22213.Neuron-#69|6,Hippocampus.Single.WGS.ON22213.Neuron-#25|2,Hippocampus.Single.WGS.ON22213.Neuron-#31|1,Liver.Bulk.WGS.ON22213|8,Hippocampus.Single.RC-seq.ON22213.Neuron-#69|3	TTTACCCTGGGAGAGGGAGGTTGCAGTGAGTCGAGATTGCGCCACTGCACTCCAGCCTGGGAAACGAGCGAGACTCCATCTCAAACAAACAAAAAAAACCCAAATCAACTTTAAGGTACAATTAGCTGTTACCAATGATGCAAAAGCATATACACATTAAATATTTCCAATTATGTACCATCTAAATAACTTTACCTAAAACAAAGGCAGACACTTTCACATGCCTTTCTCACTTAAAACTAATTCTTCTAGGACATTTTACATGAGTTAGCTCTTCTATAAAAAGTTATTGTGGCCGGGCGCGGTGGCTCACGCCTGTAATCCCAGCACTTTGGGAGGCCGAGGCGGGCGGATCACAAGGTCAGGAGATCGAGACCACGGTGAAACCCCGTCTCTACT…	GTGTGACCCGGGGTGGGGGTGCTTGCTGTTTGCCGAGATCGCGCCACTGCACTCCAGCCTGGGCGACAGAGCAACACTCCGAAAAAAAAAAAAAAAAAAAAAAAAAAAAAAAAAAAAAAAAAAAAGTTATTGTGATCATTTAAAAATCACATGCTAGATCTACAATGATCAATTTTAAAAAGCTTCTTTCTTACTATTCAGAAATGAATTATCTAGTTTCCAGATCATCCAGGCTTCTCTTTTACTCTCCATTGCCTCTTAGTTCTGTC	TCTAAATAACTTTACCTAAAACAAAGGCAGACACTTTCACATGCCTTTCTCACTTAAAACTAATTCTTCTAGGACATTTTACATGAGTTAGCTCTTCTATAAAAAGTTATTGTGGCCGGGCGCGGTGGCTCACGCCTGTAATCCCAGCACTATTTGGGAGGCCGAGGCGGGCGGATCACAAGGTCAGGAGATCGAGACCACGGTGAAACCCCGTCTCTACTAAAAATACAAAAAATTAGCCGGGCGCGGTTGTGGGCGCCTGTAGTCCCAGCTACTCGGGAGGCTGAGGCAGGAGAAGGGCGTGAACCCGGGAGGCGGAGCTTGCAGTGAGCCGAGATCGCGCCACTGCACTCCAGCCTGGGCGACAGAGCAAGACTCCGTCTCAAAAAAAAAAAAAAA…	TCTAAATAACTTTACCTAAAACAAAGGCAGACACTTTCACATGCCTTTCTCACTTAAAACTAATTCTTCTAGGACATTTTACATGAGTTAGCTCTTCTATAAAAAGTTATTGTGGCCGGGCGCGGTGGCTCACGCCTGTAATCCCAGCACTATTTGGGAGGCCGAGGCGGGCGGATCACAAGGTCAGGAGATCGAGACCACGGTGAAACCCCGTCTCTACTAAAAATACAAAAAATTAGCCGGGCGCGGTTGTGGGCGCCTGTAGTCCCAGCTACTCGGGAGGCTGAGGCAGGAGAAGGGCGTGAACCCGGGAGGCGGAGCTTGCAGTGAGCCGAGATCGCGCCACTGCACTCCAGCCTGGGCGACAGAGCAAGACTCCGTCTCAAAAAAAAAAAAAAA…
4ea89414-d891-49d8-a75e-f5d6d45bf732	Chr1	42813582	42813594	ALU	Alu_YRd4	0	269	-	-	N	AGCTTCCACTTGT	Hippocampus.Single.WGS.ON22212.Neuron-#19|1,Hippocampus.Single.WGS.ON22212.Neuron-#21|31,Hippocampus.Single.WGS.ON22212.Neuron-#7|7,Liver.Bulk.WGS.ON22212|15,Hippocampus.Single.RC-seq.ON22212.Neuron-#19|2,Hippocampus.Single.RC-seq.ON22212.Neuron-#21|4,Hippocampus.Single.RC-seq.ON22212.Neuron-#7|1	Hippocampus.Single.WGS.ON22212.Neuron-#16|1,Hippocampus.Single.WGS.ON22212.Neuron-#21|23,Hippocampus.Single.WGS.ON22212.Neuron-#7|3,Liver.Bulk.WGS.ON22212|13,Hippocampus.Single.RC-seq.ON22212.Neuron-#21|2,Hippocampus.Single.RC-seq.ON22212.Neuron-#7|2	TTTAGTAGAGACGGGGTTTCACTATGTTAGCCAGGATGGTCTCGATCTCCTGACCTCGTGATCCACCCGCCTTGGCCTCCCAAAGTGCTGGGATTACAGGCTTGAGCCACCGCGCCCGGCCAGCTTCCACTTGTAAATAAGAACATGTGGTATCTGATTTTCTGTTTGAGTTATCTCACTTAGGATAATGGCCTCCAGCTCTACCCATGTTGCTGCAAAAAACATGATTTGTATTCTTTTCTATGGCTGAGTAGTATTCCATGACATATA	TAGTTATAATAGTGGCTTTAAAATCCTTCTCTGCTAATTTTAACATCTGAATCTGTAGTCTCTGTTGAATGCCTTTTCTTTCAAATATGATTCATATTTTTCCGTTTCTTTGTACCCATGTGTTCCCATTGTTTAGCTTCCACTTGTTCTTTTTTTTTTTTTTTGAGACGGACTCTCACTCTGTCGCCCAGGCCAATGGAGTGCAGTGGCGCGATACTCGGCTCACTGCAAGCTCCGCCTCCCGGGTCTTCTCACGCCATTCTCCCGCAC	GATATTTTGTTAGAGCAGCCTGAATAGACTAGAATAATGGGGATTACACCTCAGGGAGTCATCATGAGGATTAAAAGTTAATGTTGGCCGGGCGCGGTGGCTCAAGCCTGTAATCCCAGCACTTTGGGAGGCCAAGGCGGGTGGATCACGAGGTCAGGAGATCGAGACCATCCTGGCTAACATAGTGAAACCCCGTCTCTACTAAAAATACAAAAAACTAGCCGGGCGTGGTGGCGGGCGCCTGTAGTCTCAGCTACTTGGGAGGCTGAGGCGGGAGAATGGCGTGAACCCGGGAGGCGGAGCTTGCAGTGAGCCGAGATCGCGCCACTGCACTCCAGCCTGGGCGACAGAGGGAGAGGGCGTCCGTCTCAAAAAAAAAAAAAAAAAAACAAGTGGAAG…	GATATTTTGTTAGAGCAGCCTGAATAGACTAGAATAATGGGGATTACACCTCAGGGAGTCATCATGAGGATTAAAAGTTAATGTTGGCCGGGCGCGGTGGCTCAAGCCTGTAATCCCAGCACTTTGGGAGGCCAAGGCGGGTGGATCACGAGGTCAGGAGATCGAGACCATCCTGGCTAACATAGTGAAACCCCGTCTCTACTAAAAATACAAAAAACTAGCCGGGCGTGGTGGCGGGCGCCTGTAGTCTCAGCTACTTGGGAGGCTGAGGCGGGAGAATGGCGTGAACCCGGGAGGCGGAGCTTGCAGTGAGCCGAGATCGCGCCACTGCACTCCAGCCTGGGCGACAGAGGGAGAGGGCGTCCGTCTCAAAAAAAAAAAAAAAAAAACAAGTGGAAG…
5692c731-465e-45b3-887f-605071c6a1f6	Chr1	43158846	43158830	ALU	Alu_YRa4	0	269	+	+	N	AAGATGTTAAATGTTTG	Hippocampus.Single.WGS.ON22212.Neuron-#16|3,Hippocampus.Single.WGS.ON22212.Neuron-#17|3,Hippocampus.Single.WGS.ON22212.Neuron-#21|65,Liver.Bulk.WGS.ON22212|10,Hippocampus.Single.RC-seq.ON22212.Neuron-#21|11	Hippocampus.Single.WGS.ON22212.Neuron-#17|3,Hippocampus.Single.WGS.ON22212.Neuron-#21|44,Hippocampus.Single.WGS.ON22212.Neuron-#37|2,Liver.Bulk.WGS.ON22212|8,Hippocampus.Single.RC-seq.ON22212.Neuron-#21|6	TGGAGAAAAACGATTTCTGCAAAGTGTTGCCTTTTAACTTACTGTGAAACAACGTTTTGGGAAAATCTCTAGGAATTATTGTTTTATCAGACTTTTATGCTATTAATTCAATAACAACATAACTTCCATAAGATGTTAAATGTTTGGCCGGGCGCGGTGGCTCAAGCCTGTAATCCCAGCACTTTGGGTAGAGGC	GTTAACCCGGGGTGGGGGGGTTGGAGTTTTGCCTTTTTTCCCCCATTCACCCCACCCCGGGGCCACCTCGCCTCCACCCGTAAAAAAAAAAAAAAAAAAAAAAAAAAAAAAAAAAAAAAGATGTTAAATGTTTGACAGTCTCAGCTTATACAATCACTTTATGGCAACTTATTTTAATCAAAAATTTATGGCAGGAATGTTCATCAGAACTAGGACATTTTCTACTCGTTTAAAGATTAAACTGTTATATTATTCTCCTGCCCCTTACA	CTTACTGTGAAACAACGTTTTGGGAAAATCTCTAGGAATTATTGTTTTATCAGACTTTTATGCTATTAATTCAATATCAACATAACTTCCATAAGATGTTAAATGTTTGGCCGGGCGCGGTGGCTCAAGCCTGTAATCCCAGCACTTTGGGAGGCCGAGACGGGCGGATCACGAGGTCAGGAGATCGAGACCATCCTGGCTAACACAATGAAACCCCGTCTCTACTAAAACCATACAAAAAAATTAGCCGGGCGAGGTGGCGGGCGCCTGTAGTCTCAGCTACTCAGGAGGCTGAGGCAGGAGAATGGCGTAAACCCGGGAGGCGGAGCTTGCAGTGAGCCGAGATAGCGCCACTGCACTCCAGCCTGGGCGACAGAGCGAGACTCCGTCTCAAAAAAA…	CTTACTGTGAAACAACGTTTTGGGAAAATCTCTAGGAATTATTGTTTTATCAGACTTTTATGCTATTAATTCAATATCAACATAACTTCCATAAGATGTTAAATGTTTGGCCGGGCGCGGTGGCTCAAGCCTGTAATCCCAGCACTTTGGGAGGCCGAGACGGGCGGATCACGAGGTCAGGAGATCGAGACCATCCTGGCTAACACAATGAAACCCCGTCTCTACTAAAACCATACAAAAAAATTAGCCGGGCGAGGTGGCGGGCGCCTGTAGTCTCAGCTACTCAGGAGGCTGAGGCAGGAGAATGGCGTAAACCCGGGAGGCGGAGCTTGCAGTGAGCCGAGATAGCGCCACTGCACTCCAGCCTGGGCGACAGAGCGAGACTCCGTCTCAAAAAAA…
fe2db4e6-4aee-4f11-9842-85442e9bc851	Chr1	44161443	44161456	ALU	Alu_YRd4	0	269	-	-	N	CTTCTGCACTTTTT	Hippocampus.Single.WGS.ON22212.Neuron-#10|27,Hippocampus.Single.WGS.ON22212.Neuron-#21|15,Liver.Bulk.WGS.ON22212|14,Hippocampus.Single.RC-seq.ON22212.Neuron-#10|3,Hippocampus.Single.RC-seq.ON22212.Neuron-#16|2,Hippocampus.Single.RC-seq.ON22212.Neuron-#21|3	Hippocampus.Single.WGS.ON22212.Neuron-#10|25,Hippocampus.Single.WGS.ON22212.Neuron-#16|1,Hippocampus.Single.WGS.ON22212.Neuron-#21|14,Liver.Bulk.WGS.ON22212|8,Hippocampus.Single.RC-seq.ON22212.Neuron-#10|8,Hippocampus.Single.RC-seq.ON22212.Neuron-#21|7	TTAGTAGAGACGGGGTTTCACCGTGTTAGCCAGGATGGTCTCGATCTCCTGACCTCGTGATCCGCCCGCCTCGGCCTCCCAAAGTGCTGGGATTACAGGCTTGAGCCACCGCGCCCGGCCTCTTCTGCACTTTTTAAGCACAAAAATTCTAAATGTTTCACCCTAAATGTTTACCCGTGAAGGTTCGGAGTTTCAGCAAGTCCGGTGGTTAGCTACTGATATTTTAAAACGCATTGACCATTCTTGTGAT	GAAATGTGTTAAGTAACTGCATTTTATGGGAAAATTAATTTAGGGGTTTTTAAAGGGTTTTAAGATATTTGCTTAACAGATGTTGAGAGTCTCTCAAGTCATTCCAAATCTTAGTTGCAGATGAGAATCACTTCTGCACTTTTTTTTTTTTTTTTTTTTTTTTTGAGAGGGAGTCTCGGTATGTCGCCCCGACTGGTGTGCATTGGCGCGAGCTCGGCTCACTGAGGACAAGCTCCGCCTCACCGGGTTCACGCACATTCTCCTGCCTC	TTTTAAAATATCAGTAGCTAACCACCGGACTTGCTGAATCCGAACCTTCACGGGTAAACATTTAGGGTGAAACATTTAGAATTTTTGTGCTTAAAAAGTGCAGAAGAGGCCGGGCGCGGTGGCTCAAGCCTGTAATCCCAGCACTTTGGGAGGCCGAGGCGGGCGGATCACGAGGTCAGGAGATCGAGACCATCCTGGCTAACACGGTGAAACCCCGGCTCTACTAAAAATACAAAAAGAAATTAGCCGGGGCGTGGTGGCGGGCGCCTGTAGTCCCAGCTACTCCGGAGGCTGAGTGCAGGAGAATGGCGTGAACCCGGGAGGCGGAGCTTGCAGTGAGCCGAGATCGCGCCACTGCACTCCAGTCTGGGCGACAGAGCGAGACTCCCTCTCAAAAAA…	TTTTAAAATATCAGTAGCTAACCACCGGACTTGCTGAATCCGAACCTTCACGGGTAAACATTTAGGGTGAAACATTTAGAATTTTTGTGCTTAAAAAGTGCAGAAGAGGCCGGGCGCGGTGGCTCAAGCCTGTAATCCCAGCACTTTGGGAGGCCGAGGCGGGCGGATCACGAGGTCAGGAGATCGAGACCATCCTGGCTAACACGGTGAAACCCCGGCTCTACTAAAAATACAAAAAGAAATTAGCCGGGGCGTGGTGGCGGGCGCCTGTAGTCCCAGCTACTCCGGAGGCTGAGTGCAGGAGAATGGCGTGAACCCGGGAGGCGGAGCTTGCAGTGAGCCGAGATCGCGCCACTGCACTCCAGTCTGGGCGACAGAGCGAGACTCCCTCTCAAAAAA…
6ce64a66-404d-4f19-b88c-c2f121160d83	Chr1	44753411	44753399	ALU	Alu_YRb4	0	258	-	-	N	AAACATGCCTTCT	Liver.Bulk.WGS.ON22212|13,Hippocampus.Single.RC-seq.ON22212.Neuron-#17|1	Hippocampus.Single.WGS.ON22212.Neuron-#19|1,Hippocampus.Single.WGS.ON22212.Neuron-#7|2,Liver.Bulk.WGS.ON22212|15,Hippocampus.Single.RC-seq.ON22212.Neuron-#7|1	AAAAAAAAAAAAAAAAAAAAAAAAAAAAAAGAAGGCATGTTTCATGCCTAGCATACCAAATTCATTTTAGTTGTGTCTGAAATGCACATTAATTCATGGCACAATATTTCACATTTTCCTTTTCTAATGATCCTACTTGAATCATTTGAAAATTCAGGAGATCAAAAAAATTCCTTCATTATTGGTTCAAAAATTATGATAAAAAAGGACTATGGGATGTGTAGATATGCAATTGAGTTGATGAGAAATAACCTTAAGGAAATGTCTTTAAAAAGTACATACCTTAATTTAAAATTATTGTA	TTTTTTTTTTTTTTTTTTTTTTTTTTTTTGAGACGGAGTCTCGCTCTGTCGCCCAGGCTGGAGTGCAGTGGCGCGATCTCGGCTCACTGCAAGCTCCACCTCCCGGGTTCACGCCATTCTCCTGCCTCAGCCTCCCGAGTAGCTGGGACTACAGGAGCCCACAACCGCGCCCGGCTAATTTTTTTTTTGTATTTTTAGTAGAGACGGGGTTTCACCGTGGTCTCGATCTCCTGACCTTGTGATCCGCCCGCCTCGGCCTCCCAAAGTGCTGGGATTACAGGCGTGAGCCACCGCGCCCGGCAAAACATGCCTTCTATACCTATATTTACCTATATCTTTACCATCAACTTATAAATAGATAATATATAAATAGATAGTATATCTAATATAGATATAAAA…	TTATAAGTTGATGGTAAAGATATAGGTAAATATAGGTATAGAAGGCATGTTTTGCCGGGCGCGGTGGCTCACGCCTGTAATCCCAGCACTTTGGGAGGCCGAGGCGGGCGGATCACAAGGTCAGGAGATCGAGACCACGGTGAAACCCCGTCTCTACTAAAAATACAAAAAAAAAATTAGCCGGGCGCGGTTGTGGGCTCCTGTAGTCCCAGCTACTCGGGAGGCTGAGGCAGGAGAATGGCGTGAACCCGGGAGGTGGAGCTTGCAGTGAGCCGAGATCGCGCCACTGCACTCCAGCCTGGGCGACAGAGCGAGACTCCGTCTCAAAAAAAAAAAAAAAAAAAAAAAAAAGTAACCCATTTTTTTTTCCTACTATACCAAATTCATTTTTGTTTGT	TTATAAGTTGATGGTAAAGATATAGGTAAATATAGGTATAGAAGGCATGTTTTGCCGGGCGCGGTGGCTCACGCCTGTAATCCCAGCACTTTGGGAGGCCGAGGCGGGCGGATCACAAGGTCAGGAGATCGAGACCACGGTGAAACCCCGTCTCTACTAAAAATACAAAAAAAAAATTAGCCGGGCGCGGTTGTGGGCTCCTGTAGTCCCAGCTACTCGGGAGGCTGAGGCAGGAGAATGGCGTGAACCCGGGAGGTGGAGCTTGCAGTGAGCCGAGATCGCGCCACTGCACTCCAGCCTGGGCGACAGAGCGAGACTCCGTCTCAAAAAAAAAAAAAAAAAAAAAAAAAAGTAACCCATTTTTTTTTCCTACTATACCAAATTCATTTTTGTTTGT
97c6bbbb-a22b-4be3-aac9-e22cd57a16c1	Chr1	45911237	45911251	ALU	Alu_YRa4	0	270	+	+	N	AATAAAGAAAGAGAA	Hippocampus.Single.WGS.ON22212.Neuron-#10|4,Hippocampus.Single.WGS.ON22212.Neuron-#7|1,Hippocampus.Single.WGS.ON22213.Neuron-#69|2,Liver.Bulk.WGS.ON22212|19,Liver.Bulk.WGS.ON22213|13,Hippocampus.Single.RC-seq.ON22213.Neuron-#69|1	Hippocampus.Single.WGS.ON22212.Neuron-#10|6,Hippocampus.Single.WGS.ON22212.Neuron-#16|1,Hippocampus.Single.WGS.ON22212.Neuron-#7|1,Hippocampus.Single.WGS.ON22213.Neuron-#69|2,Liver.Bulk.WGS.ON22212|19,Liver.Bulk.WGS.ON22213|11,Hippocampus.Single.RC-seq.ON22213.Neuron-#69|2	ATAATAATAATTATGATAAAGAGACTTAAAAACCATGCATGTAAAATGTGGTTAAAATAGAAATAGTTACAGATAATCAAAAGTCCTGAAAAAAGTTAGGTAACATTATGGGCAAGTAAGAATCACTGTGATGTTTTCAGAAAGAAAATACCTTGAAGAGAAAGTAATTTATTATTTTTTGTAGGACAGGCTGGTGTTGCAAAATGATGAATAGAAAGTTATTCCTTCAGTTGAGCTTAGAGTTGATAATAAAGAAAGAGAAGGCCGGGCGCGGTGGCTCAAGCCTGTAATCCCAGCACTTTGGGAGGCCGAGACGAGCGGATCACGAGGTCAGGAGATCGAGACCATCCTGGCTAACACAGTGAAACCCCGTCTCTACTAAAAAATACAAAAAAACTA…	ATAATAATAATTATGATAAAGAGACTTAAAAACCATGCATGTAAAATGTGGTTAAAATAGAAATAGTTACAGATAATCAAAAGTCCTGAAAAAAGTTAGGTAACATTATGGGCAAGTAAGAATCACTGTGATGTTTTCAGAAAGAAAATACCTTGAAGAGAAAGTAATTTATTATTTTTTGTAGGACAGGCTGGTGTTGCAAAATGATGAATAGAAAGTTATTCCTTCAGTTGAGCTTAGAGTTGATAATAAAGAAAGAGAAGGCCGGGCGCGGTGGCTCAAGCCTGTAATCCCAGCACTTTGGGAGGCCGAGACGAGCGGATCACGAGGTCAGGAGATCGAGACCATCCTGGCTAACACAGTGAAACCCCGTCTCTACTAAAAAATACAAAAAAACTA…	GAAGAGAAAGTAATTTATTATTTTTTGTAGGACAGGCTGGTGTTGCAAAATGATGAATAGAAAGTTATTCCTTCAGTTGAGCTTAGAGTTGATAATAAAGAAAGAGAAGGCCGGGCGCGGTGGCTCAAGCCTGTAATCCCAGCACTTTGGGAGGCCGAGACGAGCGGATCACGAGGTCAGGAGATCGAGACCATCCTGGCTAACACAGTGAAACCCCGTCTCTACTAAAAAATACAAAAAAACTAGCCGGGCGAGGTGGCGGGCGCCTGTAGTCCCAGCTACTCGGGAGGCTGAGGCAGGAGAATGGCGTGAACCCGGGAGGCGGAGCTTGCAGTGAGCTGAGATCCGGCCACTGCACTCCAGCCTGGGCTACAGAGCGAGACTCCATCTCAAAAAAAA…	GAAGAGAAAGTAATTTATTATTTTTTGTAGGACAGGCTGGTGTTGCAAAATGATGAATAGAAAGTTATTCCTTCAGTTGAGCTTAGAGTTGATAATAAAGAAAGAGAAGGCCGGGCGCGGTGGCTCAAGCCTGTAATCCCAGCACTTTGGGAGGCCGAGACGAGCGGATCACGAGGTCAGGAGATCGAGACCATCCTGGCTAACACAGTGAAACCCCGTCTCTACTAAAAAATACAAAAAAACTAGCCGGGCGAGGTGGCGGGCGCCTGTAGTCCCAGCTACTCGGGAGGCTGAGGCAGGAGAATGGCGTGAACCCGGGAGGCGGAGCTTGCAGTGAGCTGAGATCCGGCCACTGCACTCCAGCCTGGGCTACAGAGCGAGACTCCATCTCAAAAAAAA…
215a261e-b41e-4a83-a621-fb467e30d328	Chr1	46622107	46622095	ALU	Alu_YRb4	0	258	-	-	N	GTTATCGAGCTTT	Hippocampus.Single.WGS.ON22213.Neuron-#52|27,Liver.Bulk.WGS.ON22212|7,Liver.Bulk.WGS.ON22213|15,Hippocampus.Single.RC-seq.ON22213.Neuron-#52|8	Hippocampus.Single.WGS.ON22213.Neuron-#25|2,Hippocampus.Single.WGS.ON22213.Neuron-#52|30,Liver.Bulk.WGS.ON22212|21,Liver.Bulk.WGS.ON22213|25,Hippocampus.Single.RC-seq.ON22213.Neuron-#52|10	CATGGTTTGGATTTTGATAATGGAAGCTTTTTGCTAGACAGGTTTATAATTTTTGCATATATCCTTGTGAGATTGGTCTATATTCATTTTAAAAATTATATTTATCAGATTTTGGTGACTAAGCACCACAAATAAGTTATCGAGCTTTTTTTTTTTTTTTTTTTTTTTTTGTTTTTAAGGTATGTTATTCAAGGGGGTTCCCCGGGTGGTTTGCAGGGGGGCGTGAGCGGGTCACTGAAATCGCCCCCTCCGGGG	AAAATAAATTATTATATAATTCTACATGTGGTTAATTTTAAGTGCTGCAGGAAATGTATGATTCCCCATAAAATTATAATTTTTAAAAGGTAACCAGAAGATAGATATTTGAATATAGCAATTTCCTTAGAAAGGATTGAAAACATTTTTAAAAGTTATCAGAATTAATGGATTCACAGCCTAATTCTAACACCTAATGATATATTAAAGTATTCTACATAAAAGAATTATTAAAGCTCGATAACGGCCGGGCGCGGTGGCTCAAGCCTGTAATCCCAGCACTTTGGGAGGCCGAGGCGGGCGGATCACAAGGTCAGGAGATCGAGACCACAGTGAAACCCCGTCTCTACTAAAAATACAAAAAATTAGCCGGGCGCGGTGGCGGGCGCCTGTAGTCCC…	ATAAAAGAATTATTAAAGCTCGATAACGGCCGGGCGCGGTGGCTCAAGCCTGTAATCCCAGCACTTTGGGAGGCCGAGGCGGGCGGATCACAAGGTCAGGAGATCGAGACCACAGTGAAACCCCGTCTCTACTAAAAATACAAAAAATTAGCCGGGCGCGGTGGCGGGCGCCTGTAGTCCCAGCTACTCAGGAGGCTGAGGCAGGAGAATGGCGTGAACCCAGGAGGCGGAGCTTGCAGTGAGCCGAGATCGCGCCACTGCACTCCAGCCTGGGCAACAGCGTGAGACTCCGTCTCAAAAAAAAAAAAAAAAAAAAAAAAAAAAGCTCGATAACTTATTTGTGGTGCTTAGTCACCAAAATCTGATAAATATAATTTTTAAAATGA	ATAAAAGAATTATTAAAGCTCGATAACGGCCGGGCGCGGTGGCTCAAGCCTGTAATCCCAGCACTTTGGGAGGCCGAGGCGGGCGGATCACAAGGTCAGGAGATCGAGACCACAGTGAAACCCCGTCTCTACTAAAAATACAAAAAATTAGCCGGGCGCGGTGGCGGGCGCCTGTAGTCCCAGCTACTCAGGAGGCTGAGGCAGGAGAATGGCGTGAACCCAGGAGGCGGAGCTTGCAGTGAGCCGAGATCGCGCCACTGCACTCCAGCCTGGGCAACAGCGTGAGACTCCGTCTCAAAAAAAAAAAAAAAAAAAAAAAAAAAAGCTCGATAACTTATTTGTGGTGCTTAGTCACCAAAATCTGATAAATATAATTTTTAAAATGA
eb66da5c-8e59-4bdd-953b-e6820f15c6d2	Chr1	46695973	46695958	ALU	Alu_YRb4	0	258	-	-	N	ACTTACATTAATTTCT	Hippocampus.Single.WGS.ON22212.Neuron-#7|17,Liver.Bulk.WGS.ON22212|6,Hippocampus.Single.RC-seq.ON22212.Neuron-#7|2	Hippocampus.Single.WGS.ON22212.Neuron-#7|17,Liver.Bulk.WGS.ON22212|11,Hippocampus.Single.RC-seq.ON22212.Neuron-#7|6	ATGCTACTTTGGTCCTTTCCCTTCAAAGGCTCTTGAAGAACATTGAAAGAAGGCAATGACCTTCATCTGCATTTCAACCACCAAAGAAATTATCACCCTTGTTCACATATCTATCTTGAGACAAAAGGAAATACTTACATTAATTTCTTTTTTTTTTTTTTTTTTTGTTTTTTTTTTTTTTTTTTTTTTTTTTTTGGGGTTTTTCTGCTTTTTTCTTGGTGGGGGTGGG	ACATAAACTCTTTCATATGTGGAATCTAAAAGAGTTTAACTTATTTAAGTAGACAGTAGAAGGGTAATTACAGAGGTTGGAGTGGTTGGAAATAAGATTTGAAAGATGTTCATCAAAGGATACAAAACTACAGTTAGATAGGAGGAATAAAATTTCAAGAGATCTATGATACAAAATGGTGACTTTAGTTACCAATATACTGTATTCTTGAAAAATGCTGAGAGTGGATGTAAAATGTTCACAAATAAAATAATAACTCTGTGAGACGATGTTAGAAATTAATGTAAGTGGCCGGGCGCGGTGGCTCAAGCCTGTAATCCCAGCACTTTGGGAGGCCGAGGCGGGCGGATCACAGGGTCAGGAGATCGAGACCACAGTGAAACCCCGTCTCTACTAAAA…	TTCTTGAAAAATGCTGAGAGCGGATGTAAAATGTTCACAAATAAAATAATAACTCTGTGAGACGATGTTAGAAATTACTGTAAGTGGCCGGGCGCGGTGGCTCAAGCCTGTAATCCCAGCACTTTGGGAGGCCGAGGCGGGCGGATCACAGGGTCAGGAGATCGAGACCACAGTGAAACCCCGTCTCTACTAAAAATACAAAAAAATTAGCCGGGCGCGGTGGCGGGCGCCTGTAGTCCCAGCTACTCAGGAGGCTGAGGCAGGAGAATGGCGTGAACCCAGGAGGCGGAGCTTGCAGTGAGCCAAGATCGCGCCACTGCACTCCAGCCTGGGCAACAGCGTGAGACTCCGTATCTAAAAAAAAAAAAAACAAACCAAAAAAAAAAAAAAAAAAAGAAA…	TTCTTGAAAAATGCTGAGAGCGGATGTAAAATGTTCACAAATAAAATAATAACTCTGTGAGACGATGTTAGAAATTACTGTAAGTGGCCGGGCGCGGTGGCTCAAGCCTGTAATCCCAGCACTTTGGGAGGCCGAGGCGGGCGGATCACAGGGTCAGGAGATCGAGACCACAGTGAAACCCCGTCTCTACTAAAAATACAAAAAAATTAGCCGGGCGCGGTGGCGGGCGCCTGTAGTCCCAGCTACTCAGGAGGCTGAGGCAGGAGAATGGCGTGAACCCAGGAGGCGGAGCTTGCAGTGAGCCAAGATCGCGCCACTGCACTCCAGCCTGGGCAACAGCGTGAGACTCCGTATCTAAAAAAAAAAAAAACAAACCAAAAAAAAAAAAAAAAAAAGAAA…
923aca30-d0ae-4158-bc26-b5235f33ada7	Chr1	46864962	46864966	L1	L1_RS2	5465	6299	-	-	N	TCTTT	Hippocampus.Single.WGS.ON22212.Neuron-#19|20,Liver.Bulk.WGS.ON22212|12,Hippocampus.Single.RC-seq.ON22212.Neuron-#19|3	Hippocampus.Single.WGS.ON22212.Neuron-#19|23,Hippocampus.Single.WGS.ON22212.Neuron-#37|4,Liver.Bulk.WGS.ON22212|10,Hippocampus.Single.RC-seq.ON22212.Neuron-#19|5	GTCAGTGGACTGGGAGAGGCAGAACCACCCTCAATCTGGGTGGGCATTACCTAATCAGCTGCCAGTGCAGCCAGAATAAAAAGCAGGCTGAAGAACGTGGAGAGATTAGACTGGCTTAGCCTCTGAGGCTATATCTTCCTACCATGCTGTATGCTTCCTGCCCTTGACCATTGGACTCCACGTTATTCAGCTTTGGGACTTGGACTGAGCTTCCTTGCTCCTCAGCTTGCGGATGGCTTATTGTGGGACCATATGATTGTATGAGTTAATATTCTTTTTTTTTTTTCCATTTATTTATTATTATTATACTTTAAGTTGTAGGGTACATGTGCATAATGTGCAGGTTTGTTACATATGTATACTTGTGCCATGTTGGTGTGCTGCACCCATCAACTCATC…	GTCAGTGGACTGGGAGAGGCAGAACCACCCTCAATCTGGGTGGGCATTACCTAATCAGCTGCCAGTGCAGCCAGAATAAAAAGCAGGCTGAAGAACGTGGAGAGATTAGACTGGCTTAGCCTCTGAGGCTATATCTTCCTACCATGCTGTATGCTTCCTGCCCTTGACCATTGGACTCCACGTTATTCAGCTTTGGGACTTGGACTGAGCTTCCTTGCTCCTCAGCTTGCGGATGGCTTATTGTGGGACCATATGATTGTATGAGTTAATATTCTTTTTTTTTTTTCCATTTATTTATTATTATTATACTTTAAGTTGTAGGGTACATGTGCATAATGTGCAGGTTTGTTACATATGTATACTTGTGCCATGTTGGTGTGCTGCACCCATCAACTCATC…	GCATTGCTATTTGGTAAATAGGTTGTATTAGGGTTCTCTAGAGGGACAGAGCTAATATGATAGATGTGTATATAAAGGGAGTTTATTAAAGATCATTAAAAAGTCAGGAAACAACAGGTGCTGGAGAGGATGTGGAGAAATAGGAACACTTTTACACTGTTGGTGGGATTGTAAACTAGTTCAACCATTATGGAAAACAGTATGGCGATTCCTCAAGGATCTAGAACTAGATGTACCATATGACCCAGCCATCCCATTACTGGGTATATACCCAAAGGATTATAAATTATGCTGCTATAAAGACACATGCACACGTATGTTTATTGCGGCACTATTCACAATAGCAAAGACTTGGAATCAACCCAAATGTCCATCAGTGACAGATTGGATTAAGAAAAT…	GCATTGCTATTTGGTAAATAGGTTGTATTAGGGTTCTCTAGAGGGACAGAGCTAATATGATAGATGTGTATATAAAGGGAGTTTATTAAAGATCATTAAAAAGTCAGGAAACAACAGGTGCTGGAGAGGATGTGGAGAAATAGGAACACTTTTACACTGTTGGTGGGATTGTAAACTAGTTCAACCATTATGGAAAACAGTATGGCGATTCCTCAAGGATCTAGAACTAGATGTACCATATGACCCAGCCATCCCATTACTGGGTATATACCCAAAGGATTATAAATTATGCTGCTATAAAGACACATGCACACGTATGTTTATTGCGGCACTATTCACAATAGCAAAGACTTGGAATCAACCCAAATGTCCATCAGTGACAGATTGGATTAAGAAAAT…
2e794ade-3fd1-4e33-903a-434fc09f57f1	Chr1	47006819	47006833	ALU	Alu_YRa4	0	270	+	+	N	AAATTATCTTTTCTT	Hippocampus.Single.WGS.ON22212.Neuron-#17|26,Hippocampus.Single.WGS.ON22212.Neuron-#7|2,Liver.Bulk.WGS.ON22212|18,Hippocampus.Single.RC-seq.ON22212.Neuron-#17|7,Hippocampus.Single.RC-seq.ON22212.Neuron-#7|1	Hippocampus.Single.WGS.ON22212.Neuron-#17|30,Hippocampus.Single.WGS.ON22212.Neuron-#7|2,Liver.Bulk.WGS.ON22212|22,Hippocampus.Single.RC-seq.ON22212.Neuron-#17|6,Hippocampus.Single.RC-seq.ON22212.Neuron-#7|1	GGGTGTGGACGGATAATGGGGTGAACCTGGGTGGCGGTGCTTGCTTTCTGCTGATATCGGGCCACTGCAATCCACCCGGGGCGAACCCGCTATAAACCGTCAAAAAAAAAAAAAAAAAAAAAAAAAAAATTATCTTTTCTTTTAAAATAAATTAGTGGTTATTTTAGAGTTTGCAATATACATTTTTAACTACCTAGTTATACCTTTGAATATCACTGTACTTCTCTATAATTAGGGCAGGGATCTGAAAACAAAATATTCTCAATTCCTTT	GTTGTTATATTCACTCTGAAGATTTCTGTCTTTACATTTAAGTATTTAAACTAATCACATTTTAAGTGATTATTGATACAGTTGAACCTAACCAATTTGTAGCTGTTTTCTATTCATTGCACTGGTTCTTTGTTGGTGTTGCTTCTGCTTCTTCTTTGCTACTGTTGCTACTGTTCTATTTTTTTAATCTTCTATCTTCTCTTTATATCTTCTCCAGTTTCAACTGGGCAGCGTATCTGATTTAATTTTCTCTTCTCTGTTAGCATATAAATTATCTTTTCTTGGCCGGGCGCGGTGGCTCAAACCTGTAATCCCAGCACTTTGGGAGGCCGAGACGGGCGGATCACGAGGTCAGGAGATCGAGACCATCCTGGCTAACACAGTGAAACCCCGTCTCTA…	TCTATTTTTTTAATCTTCTATCTTCTCTTTATATCTTCTCCAGTTTCAACTGGGCAGCGTATCTGATTTAATTTTCTCTTCTCTGTTAGCATATAAATTATCTTTTCTTGGCCGGGCGCGGTGGCTCAAACCTGTAATCCCAGCACTTTGGGAGGCCGAGACGGGCGGATCACGAGGTCAGGAGATCGAGACCATCCTGGCTAACACAGTGAAACCCCGTCTCTACGTAAAAAATACAAAAAACTAGCCGGACGAGGTGGCGGGCGCCTGTAGTCCCAGCTACTTGGGAGGCTGAGGCAGGAGACTGGCGTGAACCTGGGAGGCGGAGCTTGCAGTGAGCTGAGATCCGGCCACTGCACTCCAGCCTGGGCGACAGAGCGAGACTCCGTCTCAAAAAAA…	TCTATTTTTTTAATCTTCTATCTTCTCTTTATATCTTCTCCAGTTTCAACTGGGCAGCGTATCTGATTTAATTTTCTCTTCTCTGTTAGCATATAAATTATCTTTTCTTGGCCGGGCGCGGTGGCTCAAACCTGTAATCCCAGCACTTTGGGAGGCCGAGACGGGCGGATCACGAGGTCAGGAGATCGAGACCATCCTGGCTAACACAGTGAAACCCCGTCTCTACGTAAAAAATACAAAAAACTAGCCGGACGAGGTGGCGGGCGCCTGTAGTCCCAGCTACTTGGGAGGCTGAGGCAGGAGACTGGCGTGAACCTGGGAGGCGGAGCTTGCAGTGAGCTGAGATCCGGCCACTGCACTCCAGCCTGGGCGACAGAGCGAGACTCCGTCTCAAAAAAA…
7bf33f5d-b3c4-4192-af46-52125a440921	Chr1	47055009	47054991	ALU	Alu_YRd4	0	269	+	+	N	AGAATATAGGATAATTCCC	Hippocampus.Single.WGS.ON22212.Neuron-#16|2,Hippocampus.Single.WGS.ON22212.Neuron-#17|13,Liver.Bulk.WGS.ON22212|9,Hippocampus.Single.RC-seq.ON22212.Neuron-#16|1	Hippocampus.Single.WGS.ON22212.Neuron-#16|6,Hippocampus.Single.WGS.ON22212.Neuron-#17|24,Liver.Bulk.WGS.ON22212|6,Hippocampus.Single.RC-seq.ON22212.Neuron-#16|1,Hippocampus.Single.RC-seq.ON22212.Neuron-#17|6	AAGGAAAGAAGGAAAGAAAGAAAGAAAGAAAGAGAGAAAGAGAGAAAGAGAGAAAGCAAGAAAGCGAGAAAGCAAGAAAGTTAAGGTGATGCCGACTAAAAGATTCAATAGAATATAGGATAATTCCCGCCGGGCGCGGTGGCTCAAGCCTGTAATCCCAGCACTCTGGGAGGCCGAGACGGGTGGATCACGAGGTCAGGAGATCGAGACCATCCTGGCTAACACGGTGAAACCCCGTCTCTACTAAAA	GGGAAGGGGCAGCGGGGACAGAAGAGCACAGAGAGGGGGGCCACACACGCCCGGGGCTGGCAGGGGAAGGGAGGTGATAGAAAAAAAAAAAAAAAAAAAAAAAAAAAAAAAAAAAAAAAAAGAATATAGGATAATTCCCTGAGTATATCTGTAAGACCACGGGGCCACAGATCCCAGTTTGAGAAACAGTTGTGTAGTCAGAGGATAGGAGTAGGGTAATTCTGAAGTTATAAATCTAAAAAACCGTTGACCAAATTGTTTAAATGTTCT	AAAGAGAGAAAGCAAGAAAGCGAGAAAGCAAGAAAGTTAAGGTGATGCCGACTAAAAGATTCAATAGAATATAGGATAATTCCCGCCGGGCGCGGTGGCTCAAGCCTGTAATCCCAGCACTCTGGGAGGCCGAGACGGGTGGATCACGAGGTCAGGAGATCGAGACCATCCTGGCTAACACGGTGAAACCCCGTCTCTACTAAAAAATACAAAAAACTAGCCGGGCGAGGTGGCGGGCGCCTGTAGTCCCAGCTATTCCGGAGGCTGAGGCAGGAGAATGGCGTGAACCCGGGAGGCGGAGCTTGCAGTGAGCTGAGATCTGGCCACTGTACTCCAGCCTGGGCGACAGAGCGAGACTCCGTCTCAAAAAAAAAAAAAAAAAAACAAAATAAAAAAAAA…	AAAGAGAGAAAGCAAGAAAGCGAGAAAGCAAGAAAGTTAAGGTGATGCCGACTAAAAGATTCAATAGAATATAGGATAATTCCCGCCGGGCGCGGTGGCTCAAGCCTGTAATCCCAGCACTCTGGGAGGCCGAGACGGGTGGATCACGAGGTCAGGAGATCGAGACCATCCTGGCTAACACGGTGAAACCCCGTCTCTACTAAAAAATACAAAAAACTAGCCGGGCGAGGTGGCGGGCGCCTGTAGTCCCAGCTATTCCGGAGGCTGAGGCAGGAGAATGGCGTGAACCCGGGAGGCGGAGCTTGCAGTGAGCTGAGATCTGGCCACTGTACTCCAGCCTGGGCGACAGAGCGAGACTCCGTCTCAAAAAAAAAAAAAAAAAAACAAAATAAAAAAAAA…
35c3cff7-48a2-4282-9583-aed143e5deb6	Chr1	47616983	47616994	ALU	Alu_YRc2	0	270	+	+	N	AACATTAAACTA	Hippocampus.Single.WGS.ON22212.Neuron-#37|8,Hippocampus.Single.WGS.ON22212.Neuron-#7|27,Liver.Bulk.WGS.ON22212|9,Hippocampus.Single.RC-seq.ON22212.Neuron-#7|18	Hippocampus.Single.WGS.ON22212.Neuron-#37|6,Hippocampus.Single.WGS.ON22212.Neuron-#7|36,Liver.Bulk.WGS.ON22212|13,Hippocampus.Single.RC-seq.ON22212.Neuron-#37|2,Hippocampus.Single.RC-seq.ON22212.Neuron-#7|15	CGCGGGGCCGGCCGGGAAAGCTACCACGATACCACCATATCACACTCGAAGGAGTCGCGAAAAGAAGCCCAACAAGGAAAAAAAAAAAAAAAAAAAAAAAAAAAAAAAAAAAAAAAAAAAAAACATTAAACTAAATATGCATTATTAATGATCAAATTATGGCATCACCTTGGTATTAAA	CAATGTACAAAAAAATTAAAAATGATCTCCAGGTATACAGCCAGTTACTGAATGGTGAACCTATGATTCAATCACAGAGAGTTTTCTGAAGCCCTTCTCCTGAAGTAAACACATGAACAGTATAGGTATGGTGATCACATTTGCTAATAACACTAAATTTAGTGGAACATATATTGCAGTGAGTGGTTAAATCTTAATTTTGTAAGATATTAAGACAGTGAAAAAAATCAAAATCAAAATAAAGTTAATAGAGTATATGAAGCATATGCACATCTTAATAACATTAAACTAGGCCGGGCGCGGTGGCTCACGCCTGTAATCCCACCACTTTGGGAGGCCGAGGCGGGCGGATCACAAGGTCAGGAGATCGAGACCATCCTGGCTAACACTGTGAAACCC…	ATTGCAGTTAGTGTTTAAATCTTAATTTTGTAAGATATTAAGACAGTGAAAAAAATCAAAATCAAAATAAAGTTAATAGAGTATATGAAGCATATGCACATCTTAATAACATTAAACTAGGCCGGGCGCGGTGGCTCACGCCTGTAATCCCACCACTTTGGGAGGCCGAGGCGGGCGGATCACAAGGTCAGGAGATCGAGACCATCCTGGCTAACACTGTGAAACCCCGTCTCTACTAAAAATGCAAAAAATTAGCCGGGCGAGGCGGCGGGCGCCTGTAGTCCCAGCTACTCGGGAGGCTGAGGCAGGAGAATGGCGTGAACCCGGGAGGCGGAGCTTGCAGTGAGCCGAGATCGCGCCACTGCACTCCCAGTCGCTGGGCGACTAAGCGAGACTCTG…	ATTGCAGTTAGTGTTTAAATCTTAATTTTGTAAGATATTAAGACAGTGAAAAAAATCAAAATCAAAATAAAGTTAATAGAGTATATGAAGCATATGCACATCTTAATAACATTAAACTAGGCCGGGCGCGGTGGCTCACGCCTGTAATCCCACCACTTTGGGAGGCCGAGGCGGGCGGATCACAAGGTCAGGAGATCGAGACCATCCTGGCTAACACTGTGAAACCCCGTCTCTACTAAAAATGCAAAAAATTAGCCGGGCGAGGCGGCGGGCGCCTGTAGTCCCAGCTACTCGGGAGGCTGAGGCAGGAGAATGGCGTGAACCCGGGAGGCGGAGCTTGCAGTGAGCCGAGATCGCGCCACTGCACTCCCAGTCGCTGGGCGACTAAGCGAGACTCTG…
d3c10406-ece3-4698-af62-154c9072d69d	Chr1	47823542	47823555	ALU	Alu_YRb4	0	258	+	+	N	AAATAAATCCTACA	Hippocampus.Single.WGS.ON22213.Neuron-#14|35,Hippocampus.Single.WGS.ON22213.Neuron-#69|31,Hippocampus.Single.WGS.ON22213.Neuron-#52|1,Liver.Bulk.WGS.ON22212|14,Liver.Bulk.WGS.ON22213|16,Hippocampus.Single.RC-seq.ON22213.Neuron-#14|6,Hippocampus.Single.RC-seq.ON22213.Neuron-#69|4	Hippocampus.Single.WGS.ON22212.Neuron-#16|1,Hippocampus.Single.WGS.ON22213.Neuron-#14|17,Hippocampus.Single.WGS.ON22213.Neuron-#69|28,Hippocampus.Single.WGS.ON22213.Neuron-#71|2,Hippocampus.Single.WGS.ON22213.Neuron-#25|2,Liver.Bulk.WGS.ON22212|11,Liver.Bulk.WGS.ON22213|14,Hippocampus.Single.RC-seq.ON22213.Neuron-#14|7,Hippocampus.Single.RC-seq.ON22213.Neuron-#69|7	GGAGGCGGAGCTTGCAGTGCGCTGAGCACCGGCCACTGCACTCCATCCTGGGCGGCAGAGCGATACTCCGTCTCAAAAAAAAAAAATAAAAAATAAATAAATAAATAAATAAATAAATAAATAAATCCTACAATCACAATTAGTTGTGGAATTTTCATATAGATTAGATCAATATATATCTTTTTTCAAGAAGGTATCTATTATAATTTCTTTCTATATAGAGGA	TACCACTTTGGAAGGCCAAGGTGGGTGCATCACTTGGGTCCAGGAGTTTGAGAACTGTCTGGGCAATGTGGTGAAATGCCATCTCTACAAGAAATTAAAAAATTAACCGGGTTTGGTGGTGTGCACCTCTAGTTCCAGTTACTCAGGAGGCTGATGTAGAATTGCTTGTGTCCGAAATATTGAGGCTGTAGTGAGCTGTGTTTGCATCTCTGCACTCCAGCCTGGGTGACAGAACAAGACCGTGTCTCAAAACAAAACAAAAACAAAACAAAAAAATAAATCCTACAGGCCGGGCGCGGTGGCTCAAGCCTGTAATCCCAGCACTTTGGGAGGCCGAGACGGGCGGATCACGAGGCCAGGGGATCGAGACCATCCTGGCTAACACGGTGAAACCCCGTC…	CGAAATATTGAGGCTGTAGTGAGCTGTGTTTGCATCTCTGCACTCCAGCCTGGGTGACAGAACAAGACCGTGTCTCAAAACAAAACAAAAACAAAACAAAAAAATAAATCCTACAGGCCGGGCGCGGTGGCTCAAGCCTGTAATCCCAGCACTTTGGGAGGCCGAGACGGGCGGATCACGAGGCCAGGGGATCGAGACCATCCTGGCTAACACGGTGAAACCCCGTCTCTACTAAAAAAAAATACAAAAAACTAGCCGGGCGCGGTGGCAGGCGCCTGTAGTCCCAACTACTCGGATGAG	CGAAATATTGAGGCTGTAGTGAGCTGTGTTTGCATCTCTGCACTCCAGCCTGGGTGACAGAACAAGACCGTGTCTCAAAACAAAACAAAAACAAAACAAAAAAATAAATCCTACAGGCCGGGCGCGGTGGCTCAAGCCTGTAATCCCAGCACTTTGGGAGGCCGAGACGGGCGGATCACGAGGCCAGGGGATCGAGACCATCCTGGCTAACACGGTGAAACCCCGTCTCTACTAAAAAAAAATACAAAAAACTAGCCGGGCGCGGTGGCAGGCGCCTGTAGTCCCAACTACTCGGATGAG
3ecaa4dc-dd61-4dc7-b484-844999764c15	Chr1	48040160	48040152	ALU	Alu_YRa4	0	270	+	+	N	AAAAAAAAA	Hippocampus.Single.WGS.ON22212.Neuron-#10|1,Hippocampus.Single.WGS.ON22213.Neuron-#25|1,Hippocampus.Single.WGS.ON22213.Neuron-#39|1,Liver.Bulk.WGS.ON22212|2,Liver.Bulk.WGS.ON22213|10	Hippocampus.Single.WGS.ON22213.Neuron-#39|1,Liver.Bulk.WGS.ON22213|10	AGGTCTTTTTTAAATAAATGTTCACAGTCACCTCATTTGTGTCAATTTTTTAAAAAAGTATTAGACATGGAAAGCAGAGTTTAAATTGAAGTGAGAAAAAAATAAAGGCTATAAATCTTGTTTAAAAACAGAGAATTTTCCATTTAAAATAGATATTCTTGTTTTCTTAATCAGTAGAGAGATTAGAAACAAAAGCAATGATTTCATTGCATGCATTATTTTATAGAGCATGTTTTAAAGCCCATGGATCACAAAAATTAAAAAAAAAAAACTGCTTGGCCGGGCGCGGTGGCTCAAGCCTGTAATCCCAGCACTTTGGGAGGCCGAGACGGGTGGATCACGAGGTCAGGAAATCGAGACCATCCTGGCTAACACGGTGAAACCCCATCTCTACTAAAA…	CCGGGAGGTGGAGCTTGCAGTGAGCTGAGATCCGGCCACTGCACCCCAGCCTGGGCGACAGAGCAAGACTCCGTCTCAAAAACAAAACAAAACAAAACAAAACAAAAAAAAACTGCTTAATTTTCATGGCATACAGTTTTTAAAAGCGAAGATTAGTTTAAAATGGGAGTTAAAAAAAGAAGCACATGATGTTTTAGAGAGATGTTTTATTAGGTTAATATAAGAAAGATTCAATGCATTCTTCTTTG	GTAGAGAGATTAGAAACAAAAGCAATGATTTCATTGCATGCATTATTTTATAGAGCATGTTTTAAAGCCCATGGATCACAAAAATTAAAAAAAAAAAACTGCTTGGCCGGGCGCGGTGGCTCAAGCCTGTAATCCCAGCACTTTGGGAGGCCGAGACGGGTGGATCACGAGGTCAGGAGATCGAGACCATCCTGGCTAACACGGTGAAACCCCATCTCTACTAAAAAATACAAAAAACTAGCCGGGCGAGGTGGCGGGCGCCTGTAGTCCCAGCTACTCAGGAGGCTGAGGCAGGAGAATGGCGTAAACCCGGGAGGTGGAGCTTGCAGTGAGCTGAGATCCGGCCACTGCACCCCAGCCTGGGCGACAGAGCAAGACTCCGTCTCAAAAAAAAAACAA…	GTAGAGAGATTAGAAACAAAAGCAATGATTTCATTGCATGCATTATTTTATAGAGCATGTTTTAAAGCCCATGGATCACAAAAATTAAAAAAAAAAAACTGCTTGGCCGGGCGCGGTGGCTCAAGCCTGTAATCCCAGCACTTTGGGAGGCCGAGACGGGTGGATCACGAGGTCAGGAGATCGAGACCATCCTGGCTAACACGGTGAAACCCCATCTCTACTAAAAAATACAAAAAACTAGCCGGGCGAGGTGGCGGGCGCCTGTAGTCCCAGCTACTCAGGAGGCTGAGGCAGGAGAATGGCGTAAACCCGGGAGGTGGAGCTTGCAGTGAGCTGAGATCCGGCCACTGCACCCCAGCCTGGGCGACAGAGCAAGACTCCGTCTCAAAAAAAAAACAA…
fe3d4d47-0941-47f3-84a5-18ba0935e3db	Chr1	48053022	48053009	ALU	Alu_YRa4	0	270	+	+	N	AGAAAAGTTATATT	Hippocampus.Single.WGS.ON22212.Neuron-#10|1,Hippocampus.Single.WGS.ON22212.Neuron-#19|4,Hippocampus.Single.WGS.ON22212.Neuron-#21|1,Hippocampus.Single.WGS.ON22212.Neuron-#7|5,Hippocampus.Single.WGS.ON22213.Neuron-#31|2,Liver.Bulk.WGS.ON22212|30,Liver.Bulk.WGS.ON22213|14,Hippocampus.Single.RC-seq.ON22212.Neuron-#7|1	Hippocampus.Single.WGS.ON22212.Neuron-#10|1,Hippocampus.Single.WGS.ON22212.Neuron-#19|7,Hippocampus.Single.WGS.ON22212.Neuron-#21|1,Hippocampus.Single.WGS.ON22212.Neuron-#7|2,Hippocampus.Single.WGS.ON22213.Neuron-#25|1,Liver.Bulk.WGS.ON22212|23,Liver.Bulk.WGS.ON22213|13,Hippocampus.Single.RC-seq.ON22212.Neuron-#17|1,Hippocampus.Single.RC-seq.ON22212.Neuron-#19|1,Hippocampus.Single.RC-seq.ON22212.…	AACTTTTCTTTAATTTTTTTTTTTTTTTTTGAGACTGAGTCTGGCTCTGTCGCCCAGGCTGGAGTGCAGTGGCCGGATCTCAGCTCACTGCAAGCTCCGCCTCCCGGGTTTACGCCATTCTCCTGCCTCAGCCTCCCAAGTAGCTGGGACCACAGGCGCCCGCCACTTCGCCCGGCTAGTTTTTTGTATTTTTTAGTAGAGATGGGGTTTCACCGTGTTAGCCAGGATGGTCTCGATCTCCTGACCTCGTGATCCGCCCGTCTCGGCCTCCCAAAGTGCTGGGATTACAGGCTTGAGCCACCGCGCCCGGCCAATATAACTTTTCTGATGAACATTAAATCTATGTATTTTGTTTGCATATATAATTACAAAATTTTGCAATTTAAAGCTTTTATTTTT…	GAGGCAGGAGAATGGCGTAAACCCGGGAGGCGGAGCTTGCAGTGAGCTGAGATCCGGCCACTGCACTCCAGCCTGGGCGACAGAGCCAGACTCAGTCTCAAAAAAAAAAAAAAAAAATTAAAGAAAAGTTATATTAAGGACTATTTCCTACATCTCTAGGAATATATCAGTTTCTTCCTCTACATATTTAGCCACTCTTATTTGTTGCAGATAGTATGACTATATTTGC	ATTGAAGAGTATAAAAATATATAAAAATAAAAGCATTAAATTGCAAAATTTTGTAATTATATATGCAAACAAAATACATAGATTTAATGTTCATCAGAAAAGTTATATTGGCCGGGCGCGGTGGCTCAAGCCTGTAATCCCAGCACTTTGGGAGGCCGAGACGGGCGGATCACGAGGTCAGGAGATCGAGACCATCCTGGCTAACACGGTGAAACCCCATCTCTACTAAAAAATACAAAAAACTAGCCGGGCGAAGTGGCGGGCGCCTGTGGTCCCAGCTACTTGGGAGGCTGAGGCAGGAGAATGGTCGTAAACCCGGGAGGCGGAGCTTGCAGGGAGCTGAGATCGCGCCACTGCACTCCAGCCCGGGCGACAGAGCAAGACTCTGTCTCAAAAAAA…	ATTGAAGAGTATAAAAATATATAAAAATAAAAGCATTAAATTGCAAAATTTTGTAATTATATATGCAAACAAAATACATAGATTTAATGTTCATCAGAAAAGTTATATTGGCCGGGCGCGGTGGCTCAAGCCTGTAATCCCAGCACTTTGGGAGGCCGAGACGGGCGGATCACGAGGTCAGGAGATCGAGACCATCCTGGCTAACACGGTGAAACCCCATCTCTACTAAAAAATACAAAAAACTAGCCGGGCGAAGTGGCGGGCGCCTGTGGTCCCAGCTACTTGGGAGGCTGAGGCAGGAGAATGGTCGTAAACCCGGGAGGCGGAGCTTGCAGGGAGCTGAGATCGCGCCACTGCACTCCAGCCCGGGCGACAGAGCAAGACTCTGTCTCAAAAAAA…
4775489a-cff5-4d69-ac58-bf93cea2e0f0	Chr1	48523900	48523914	ALU	Alu_YRb4	0	258	+	+	N	AAAGATGAATAAGTG	Hippocampus.Single.WGS.ON22212.Neuron-#16|16,Hippocampus.Single.WGS.ON22212.Neuron-#19|2,Liver.Bulk.WGS.ON22212|9,Hippocampus.Single.RC-seq.ON22212.Neuron-#16|18,Hippocampus.Single.RC-seq.ON22212.Neuron-#19|2	Hippocampus.Single.WGS.ON22212.Neuron-#16|14,Hippocampus.Single.WGS.ON22212.Neuron-#19|1,Liver.Bulk.WGS.ON22212|14,Hippocampus.Single.RC-seq.ON22212.Neuron-#16|15,Hippocampus.Single.RC-seq.ON22212.Neuron-#19|4,Hippocampus.Single.RC-seq.ON22213.Neuron-#31|1	GGACGTTTATTGGGGTGACCCGGGGGTGCGGGGGTTGCGGTGAGCCTATTTCGCGCCCAAGACCCCCCCCCGGGGCTCCAGCGCGATACTCTTCATCAAAAAAAAAAAAAAAAAAAAAAAAAAAAGATGAATAAGTGGGGTTTATTCCAGAAATACCAGGTTAGTGCAATAGTTAAAAATCAATCATTGTAATATAGCGCATTAAAAAAATAAAAATAAGATCACCTCAATAGATACATCAAAAAATTTAACAAAATCAAATACGCTTT	ATAAAAACTCATGAAATTTTTTGCTAGTAGACCATCCCTATTAAAAAAAAAAAAATACTAAGAGAGTCCTTCAGGCTAAAATTAAAGGGAACTAAACAAAGACACAAATTTACATTAAAAAAGAATGAATACCTCAATAAAGATAACTTCACAGAGAAATGTAGAAAACAGTATAAATGTATGTTTGTAACACTTTTCTTCTATTTTATTTGTAAGAAAACTTCATAAAGCAATAATTGCTTATCTCTGTTGATTGTCTTATATTGTATAAAGATGAATAAGTGCCGGGCGCGGTGGCTCACGCCTGTAATCCCAGCACTTTGGGAGGCCGAGGCGGGCGGATCACAAGGTCAGGAGATCGAGACCACGGTGAAACCCCGTCTCTACTAAAAATACAAA…	ATGTATGTTTGTAACACTTTTCTTCTATTTTATTTGTAAGAAAACTTCATAAAGCAATAATTGCTTATCTCTGTTGATTGTCTTATATTGTATAAAGATGAATAAGTGCCGGGCGCGGTGGCTCACGCCTGTAATCCCAGCACTTTGGGAGGCCGAGGCGGGCGGATCACAAGGTCAGGAGATCGAGACCACGGTGAAACCCCGTCTCTACTAAAAATACAAAAAATTAGCCGGGCGCGGTTGTGGGCGCCTGTAGTCCCAGCACTTACCCGGGAGGCTGAGGCAGGAGAATGGCGTGAACCCGGGAGGCGGAGCTTGCAGTGAGCCGAGATCGCGCCACTGCACTCCAGCCTGGGCGACAGAGCGAGACTCTGTCTCAAAAAAAAAAAGAGAAAAAAA…	ATGTATGTTTGTAACACTTTTCTTCTATTTTATTTGTAAGAAAACTTCATAAAGCAATAATTGCTTATCTCTGTTGATTGTCTTATATTGTATAAAGATGAATAAGTGCCGGGCGCGGTGGCTCACGCCTGTAATCCCAGCACTTTGGGAGGCCGAGGCGGGCGGATCACAAGGTCAGGAGATCGAGACCACGGTGAAACCCCGTCTCTACTAAAAATACAAAAAATTAGCCGGGCGCGGTTGTGGGCGCCTGTAGTCCCAGCACTTACCCGGGAGGCTGAGGCAGGAGAATGGCGTGAACCCGGGAGGCGGAGCTTGCAGTGAGCCGAGATCGCGCCACTGCACTCCAGCCTGGGCGACAGAGCGAGACTCTGTCTCAAAAAAAAAAAGAGAAAAAAA…
244376d2-1c25-441a-a678-9d672166d766	Chr1	49476798	49476782	ALU	Alu_YRd4	0	270	-	-	N	CAGGCTGTTCTTTTTCT	Hippocampus.Single.WGS.ON22212.Neuron-#16|1,Hippocampus.Single.WGS.ON22212.Neuron-#21|25,Hippocampus.Single.WGS.ON22212.Neuron-#7|6,Liver.Bulk.WGS.ON22212|6,Hippocampus.Single.RC-seq.ON22212.Neuron-#16|1,Hippocampus.Single.RC-seq.ON22212.Neuron-#21|5,Hippocampus.Single.RC-seq.ON22212.Neuron-#7|4	Hippocampus.Single.WGS.ON22212.Neuron-#16|5,Hippocampus.Single.WGS.ON22212.Neuron-#21|47,Hippocampus.Single.WGS.ON22212.Neuron-#7|11,Liver.Bulk.WGS.ON22212|14,Hippocampus.Single.RC-seq.ON22212.Neuron-#16|1,Hippocampus.Single.RC-seq.ON22212.Neuron-#21|11,Hippocampus.Single.RC-seq.ON22212.Neuron-#7|2	ATTGTATTGGTTTCCTGTTGCTGCTGTATCAACTTACCACAACTACAGTGATTAAAACAACACAATTTGATTATCTTATAGTTGTGTAAGAAGTCCAGCATGCATTTGATCAAAATAAATCAAGATGTCAGCAGGCTGTTCTTTTTCTTTTTTTTTTTTTTTTTTTTTTTTTTTTTTTTTTTTTTTATTGGGTGGGCCCCCCTGGGCTCCCCGGCCGGGGGGGCCGGGCCCGTGTC	GCTGAAACTGCACCAAGCCAATCCTGGGGGAACTTCTCTCATGCTAGAAACAAGTCCCCTAGGTGCCCCCTTCCAACATCACCACATTGAAGATCAAATTTCAACCTGAGATTTGGGGTCAGGGGACAAACAAATCACATCCAAACCACAGCAGTGGGAATGATCCTCTGTCTGTAGCCAGCAAGGGAAGGAAGTAGCTGGTTTATAACTGCAAACAGCTTAATTCTGCCAACAATCCAAATGAGCAGAAACGGGACTCTTCCTTAAACCCTTCAGAAAAAGAACAGCCTGGCCGGGCGCGGTGGCTCAAGCCTGTAATCCCAGCACTTTGGGAGGCCGAGGCGGGTGGATCACGAGGTCAGGAGATCGAGACTATCCTGGCTAACATGGTGAAACCCC…	TCTTCCTTAAACCCTTCAGAAAAAGAACAGCCTGGCCGGGCGCGGTGGCTCAAGCCTGTAATCCCAGCACTTTGGGAGGCCGAGGCGGGTGGATCACGAGGTCAGGAGATCGAGACTATCCTGGCTAACATGGAAAAACCCCGTCTCTACTAAAAATACAAAAAAAACTAGCCGGGCGTGGTGGCGGGCGCCTGTAGTCTCAGCTACTTGGGAGGCTGAGGCGGGAGAATGGCGTGAACCCGGGAGGCGGAGCTTGCAGTGAGCCGAGATCAGGCCACTGCACTCCAGCCTGGGAGACACAGCGAGACTCCGTCTCAAAAAAAAAAAAAAAAAAAAAAAAAAAAAAAAAAAAAAAAAAAAAAAAAAAACAAGCCTGCTGACATCTT	TCTTCCTTAAACCCTTCAGAAAAAGAACAGCCTGGCCGGGCGCGGTGGCTCAAGCCTGTAATCCCAGCACTTTGGGAGGCCGAGGCGGGTGGATCACGAGGTCAGGAGATCGAGACTATCCTGGCTAACATGGAAAAACCCCGTCTCTACTAAAAATACAAAAAAAACTAGCCGGGCGTGGTGGCGGGCGCCTGTAGTCTCAGCTACTTGGGAGGCTGAGGCGGGAGAATGGCGTGAACCCGGGAGGCGGAGCTTGCAGTGAGCCGAGATCAGGCCACTGCACTCCAGCCTGGGAGACACAGCGAGACTCCGTCTCAAAAAAAAAAAAAAAAAAAAAAAAAAAAAAAAAAAAAAAAAAAAAAAAAAAACAAGCCTGCTGACATCTT
7880b40c-f855-44bd-904e-ae8ff3e55dbb	Chr1	49590138	49590122	ALU	Alu_YRb4	0	258	+	+	N	TAAATAATGAGTCGTGA	Hippocampus.Single.WGS.ON22212.Neuron-#19|49,Hippocampus.Single.WGS.ON22212.Neuron-#37|2,Liver.Bulk.WGS.ON22212|15,Hippocampus.Single.RC-seq.ON22212.Neuron-#19|10	Hippocampus.Single.WGS.ON22212.Neuron-#19|59,Hippocampus.Single.WGS.ON22212.Neuron-#37|1,Liver.Bulk.WGS.ON22212|16,Hippocampus.Single.RC-seq.ON22212.Neuron-#19|4	CACTTCTAATTCTAGTTTTTTGGCTATTTCCTTCCCATCTGCAGTGACTTCTTCCACTGAAATCTTGAATCCCTCAGTTGTCCAAGGAGGGTTGAAATCAACTTCTTCCAATCTCCTGCTAATGTTGATATTTTGATCTCTTCGCATGAATCACAAATGTTCTCAATGTCATCTAGAATGATGACCGTTTTACAGAAGGTTTTCAATTTGCTTTGCCCAAATCCATCAGAGGAATCACTATCTATGGAAGCTATAGCCTTATACAATTTAGTTTTTAAATAATGAGTCGTGAGGCCGGGCGCGGTGGCTCAAGCCTGTAATCCCAGCACTTTGGGAGGCCGAGGCGGGCGGATCACAAGGTCAGGAGATCGAGACCACAGTGAAACCCCGTCTCTACTA…	CGTGAACCCAGGAGGCGGAGATTGCAGTGAGCCGAGATCGCGCCACTGCACTCCAGCCTGGGCAACAGCGTGAGACTCCGTCTCAAAAAAAAAAAAAAAATAAATAAATAAATAAATAAATAAATAATGAGTCGTGAAACCCAAAATTACACCTTGATCCATGGGCTGCAGAAAATGTTAAGCTCACAGACATGAAAACAACACTACTCATTCCTTTGTATGATTCTGTCAGAGCTCTTGGGAGACCAGATGCATTGTCAATGATCA	GATGACCGTTTTACAGAAGGTTTTCAATTTGCTTTGCCCAAATCCATCAGAGGAATCACTATCTATGGAAGCTATAGCCTTATACAATTTAGTTTTTAAATAATGAGTCGTGAGGCCGGGCGCGGTGGCTCAAGCCTGTAATCCCAGCACTTTGGGAGGCCGAGGCGGGCGGATCACAAGGTCAGGAGATCGAGACCACAGTGAAACCCCGTCTCTACTAAAAATACAAAAAAATTAGCCGGGCGTGGTGGCGGGCGCCTGTAGTCCTAGCTACTCAGGAGGCTGAGGCAGGAGAATGGCGTGAACCCAGGAGGCGGAGATTGCAGTGGCGCGATCGCGCCACTGCACTCCAGCCTGGGCAACAGCGTGAGACTCCGTCTCAAAAAATAAAAAAAATAA…	GATGACCGTTTTACAGAAGGTTTTCAATTTGCTTTGCCCAAATCCATCAGAGGAATCACTATCTATGGAAGCTATAGCCTTATACAATTTAGTTTTTAAATAATGAGTCGTGAGGCCGGGCGCGGTGGCTCAAGCCTGTAATCCCAGCACTTTGGGAGGCCGAGGCGGGCGGATCACAAGGTCAGGAGATCGAGACCACAGTGAAACCCCGTCTCTACTAAAAATACAAAAAAATTAGCCGGGCGTGGTGGCGGGCGCCTGTAGTCCTAGCTACTCAGGAGGCTGAGGCAGGAGAATGGCGTGAACCCAGGAGGCGGAGATTGCAGTGGCGCGATCGCGCCACTGCACTCCAGCCTGGGCAACAGCGTGAGACTCCGTCTCAAAAAATAAAAAAAATAA…
a03d634b-4fc0-4e92-bc93-2b9a65c285f2	Chr1	49596681	49596697	ALU	Alu_YRa4	0	270	+	+	N	AGAAGCCAGAGTGTTTC	Hippocampus.Single.WGS.ON22213.Neuron-#31|11,Hippocampus.Single.WGS.ON22213.Neuron-#39|32,Hippocampus.Single.WGS.ON22213.Neuron-#47|9,Liver.Bulk.WGS.ON22213|13,Hippocampus.Single.RC-seq.ON22213.Neuron-#71|1,Hippocampus.Single.RC-seq.ON22213.Neuron-#31|2,Hippocampus.Single.RC-seq.ON22213.Neuron-#39|13,Hippocampus.Single.RC-seq.ON22213.Neuron-#47|3	Hippocampus.Single.WGS.ON22213.Neuron-#71|2,Hippocampus.Single.WGS.ON22213.Neuron-#31|8,Hippocampus.Single.WGS.ON22213.Neuron-#39|35,Hippocampus.Single.WGS.ON22213.Neuron-#47|17,Liver.Bulk.WGS.ON22213|14,Hippocampus.Single.RC-seq.ON22213.Neuron-#71|1,Hippocampus.Single.RC-seq.ON22213.Neuron-#31|5,Hippocampus.Single.RC-seq.ON22213.Neuron-#39|16,Hippocampus.Single.RC-seq.ON22213.Neuron-#47|2	GGGCGTCTTTGGCTGTTTAAGGGCTTAAACCGGGGGGGCGTTTTTTGATGTGAGCTTTGATACAGCACCTGAACTCCTCCCTGGGCGAAAGTGCGATACTCCTGCTAAAAAAAAAAAAAAAAAAAAAAAAGAAGCCAGAGTGTTTCCAAGAGAAACAGGATGGTGGGGCTCAGGCCACAGACTGTTACTCTTTGAGTAACTTCCATGTCTGAACTAGCAACTCTATGACAAAATCAGACTGAGAGTTTCCAAAGTGCTTTGTTCAGAGCAGCAATAT	TCAAGGCGCTGTTAGAAAGAAAGATGGGTTGGGTAGATAGCTAACAGTATTTGCTACACTGAATGTATTTTCATCATCATGAAGAAAATACCAAAATTTGTTAGACAATAGTTTACTGATGGTTTATACATTAATTAGATTATAAGTATAAAAATATGTAGGTAAAAAGGTTTACACGTTCACCTTTGTTTAAAATAATGAAAAGATCTAGATTTCCAACTAATTTTTATATCACTTCCTGGAGAAATCACACAATCGCCTTGCTTAGAAGCCAGAGTGTTTCTGGCCGGGCGCGGTGGCTCAAGCCTGTAATCCCAGCACTCTGGGAGGCCGAGACGGGTGGATCACGAGGTCAGGAGATCGAGACCATCCTGGCTAACATGGTGAAACCCCGTCTCT…	AGATCTAGATTTCCAACTAATTTTTATATCACTTCCTGGAGAAATCACACAATCGCCTTGCTTAGAAGCCAGAGTGTTTCTGGCCGGGCGCGGTGGCTCAAGCCTGTAATCCCAGCACTCTGGGAGGCCGAGACGGGTGGATCACGAGGTCAGGAGATCGAGACCATCCTGGCTAACATGGTGAAACCCCGTCTCTACTAAAAAGTACAAAAAACTAGCCGGGCGAGGTGGCGGGCGCCTGTAGTCCCGGCTACCCGGGAGGCTGAGGCAGGAGAATGGCGTAAACCCGGGAGGCGGAGTTTGCAGTGAGCTGAGATACAGCCACTGCACTCCAGCCTGGGCGACAGAGCGAGACTCCGTCTCAAAAAAAAAAAAAAAAAAAAAAGAATAATACACAGT…	AGATCTAGATTTCCAACTAATTTTTATATCACTTCCTGGAGAAATCACACAATCGCCTTGCTTAGAAGCCAGAGTGTTTCTGGCCGGGCGCGGTGGCTCAAGCCTGTAATCCCAGCACTCTGGGAGGCCGAGACGGGTGGATCACGAGGTCAGGAGATCGAGACCATCCTGGCTAACATGGTGAAACCCCGTCTCTACTAAAAAGTACAAAAAACTAGCCGGGCGAGGTGGCGGGCGCCTGTAGTCCCGGCTACCCGGGAGGCTGAGGCAGGAGAATGGCGTAAACCCGGGAGGCGGAGTTTGCAGTGAGCTGAGATACAGCCACTGCACTCCAGCCTGGGCGACAGAGCGAGACTCCGTCTCAAAAAAAAAAAAAAAAAAAAAAGAATAATACACAGT…
2ea57779-6b94-4a52-b839-30e835920da2	Chr1	49668687	49668671	ALU	Alu_YRa4	0	269	+	+	N	AAAGAAACAGGTAGATT	Hippocampus.Single.WGS.ON22212.Neuron-#19|2,Hippocampus.Single.WGS.ON22212.Neuron-#21|9,Hippocampus.Single.WGS.ON22212.Neuron-#7|4,Liver.Bulk.WGS.ON22212|17,Hippocampus.Single.RC-seq.ON22212.Neuron-#19|2,Hippocampus.Single.RC-seq.ON22212.Neuron-#21|6,Hippocampus.Single.RC-seq.ON22212.Neuron-#7|1	Hippocampus.Single.WGS.ON22212.Neuron-#19|4,Hippocampus.Single.WGS.ON22212.Neuron-#21|3,Hippocampus.Single.WGS.ON22212.Neuron-#7|4,Liver.Bulk.WGS.ON22212|11,Hippocampus.Single.RC-seq.ON22212.Neuron-#21|3,Hippocampus.Single.RC-seq.ON22212.Neuron-#7|1	CAGAATATATCCTGGAATATGTGGGGATCTTAGTATCTCCACAAAAAGGTTTGGAGAATATATAGAATATAGAATAGAATATAATAGATCTCCATTAGACCTCACTGGAAATGCCTATGTGTGGTAATGGTAAAGAAACAGGTAGATTGGCCGGGCGCGGTGGCTCAAGCCTGTAATCCCAGCACTTTGGGAGGCCGAGACGGGCGGATCACGAGGTCAGGAGATCGAAACCATCCTGGCTAACACGGTGAAACCCCCGTCTCTATTAA	GGTTGAGGCCGGTGTTTGGGTTTAACCTGGGAGGGGGTGGTTGCATTGAGCTGAGATCCGGCCAATGCAATCCTCCCTGGGCGTAATTGCGCGACTCCGTATAAAAAAAAAAAAAAAAAAAAAAAAAGAAACAGGTAGATTATATGTAGATATATGTTCCTTGGGAGAGATGCGAATCAGTGAAGAGCGCATGTTATTTGATCCATTTATCAAACAAAAAGAAACACAAATTAGAAAGAAAAGCAGTGCTGTAAGGAACAAAGGAAAATATG	CAAAAAGGTTTGGAGAATATATAGAATATAGAATAGAATATAATAGATCTCCATTAGACCTCACTGGAAATGCCTATGTGTGGTAATGGTAAAGAAACAGGTAGATTGGCCGGGCGCGGTGGCTCAAGCCTGTAATCCCAGCACTTTGGGAGGCCGAGACGGGCGGATCACGAGGTCAGGAGATCGAAACCATCCTGGCTAACACGGTGAAACCCCCGTCTCTATTAAGAAATACAAAAAACTAGCCGGGCGAGGTGGCGGGCGCCTGTAGTCCCAGCTACTCGGGAGGCTGAGGCCGGAGAATGGCGTGAACCTGGGAGGCGGAGCTTGCAGTGAGCTGAGATCCGGCCACTGCACTCCAGCCTGGGCGACAGAGCGAGACTCCGTCTCAAAAAAAAA…	CAAAAAGGTTTGGAGAATATATAGAATATAGAATAGAATATAATAGATCTCCATTAGACCTCACTGGAAATGCCTATGTGTGGTAATGGTAAAGAAACAGGTAGATTGGCCGGGCGCGGTGGCTCAAGCCTGTAATCCCAGCACTTTGGGAGGCCGAGACGGGCGGATCACGAGGTCAGGAGATCGAAACCATCCTGGCTAACACGGTGAAACCCCCGTCTCTATTAAGAAATACAAAAAACTAGCCGGGCGAGGTGGCGGGCGCCTGTAGTCCCAGCTACTCGGGAGGCTGAGGCCGGAGAATGGCGTGAACCTGGGAGGCGGAGCTTGCAGTGAGCTGAGATCCGGCCACTGCACTCCAGCCTGGGCGACAGAGCGAGACTCCGTCTCAAAAAAAAA…
ddd8bcb5-960d-4cab-b31d-78c2585d3487	Chr1	50723708	50723722	L1	L1_RS2	3054	6299	+	-	Y	GTCTGTACTCTTTTT	Hippocampus.Single.WGS.ON22212.Neuron-#16|9,Hippocampus.Single.WGS.ON22212.Neuron-#17|1,Hippocampus.Single.WGS.ON22212.Neuron-#19|3,Hippocampus.Single.WGS.ON22212.Neuron-#7|2,Hippocampus.Single.WGS.ON22213.Neuron-#49|1,Liver.Bulk.WGS.ON22212|19,Hippocampus.Single.RC-seq.ON22212.Neuron-#16|6	Hippocampus.Single.WGS.ON22212.Neuron-#19|22,Hippocampus.Single.WGS.ON22212.Neuron-#21|7,Liver.Bulk.WGS.ON22212|17,Hippocampus.Single.RC-seq.ON22212.Neuron-#19|9,Hippocampus.Single.RC-seq.ON22212.Neuron-#21|2	ATTGACAAATGGGATCTCATTAAACTAAAGAGCTTCTGCACAGCAAAAGAAACTACCATCAGAGTGAACAGGCAACCTACAGAATGGGAGAAAATTTTTGCAATCTACTCATCTGACAAAGGTCTGTACTCTTTTTAACAGGTGATGAGAGTTAGTGTAACAGAGAATAACCACAGAGGAAAGTGAATCCTCGTAATTGTTTTGTTGGAAAAGTTTTATTTTTTAGTAAACTTGTTTTATTGTTGTGTAACAGGCATGCAAAAGAGGT	TTATATTATTTTTAATCTGTGTAATATACCAATTAAGTTAAGATTTATGATTTATGTGTAAGAGATAACTGAAACTTAGAGAGGTTAAGTTATTTGTGCAGTCACACAGCATGCAAGCAGCAGAACCAGTAGAGTCTGTACTCTTTTTTTTTTTATTTAAAAATTAATTTATTATTATTATACTTTAAGTTGTAGGGTACATGTGCACACTTAA	TTTAAAGTTCATATGGAACCAAAAAAGAGCCCGCATCTCCAAGACAATCCTAAGTCAAAAGAACAAAGCTGGAGGCATCACGCTACCTGACTTCAAACTATACTACAAGGCTACAGTAACCAAAACAGCATGGTACTGGTACCAAAACAGAGATATAGACCAATGGAACAGAACAGAGTCCTCAGAAATAATACCACACATCTACAGCCATCTGATCTTTGACAAACCTGAGAGAAACCAGAAATGGGGA	TATGGCGATTCCTCAAGGATCTAGAACTAGATGTACCATATGACCCAGCCATCCCATTACTGGGTATATACCCAAAGGATTATAAATTATGCTGCTATAAAGACACATGCACACGTATGTTTATTGCAGCACTATTCACAATAGCAAAGACTTGGAATCAACCCAAATGTCCATCAGTGACAGATTGGATTAAGAAAATGTGGCACATATACACCATGGAATACTATGCAGCCATCAAAAAGGATGAGTTTGTGTCCTTTGTAGGGACATGGATGCAGCTGGAAACCATCATTCTTAGCAAACTATCACAAGAACAGAAAACCAAACACCACATGTTCTCACTCATAGGTGGGAACTGAACAATGAGATCACTTGGACTCAGTGAAGGGGAACATCACA…
fc5541c8-d7ce-45e4-9a75-13b67432b62e	Chr1	51642251	51642241	ALU	Alu_YRa4	0	270	-	-	N	GCAAAATCTTT	Hippocampus.Single.WGS.ON22212.Neuron-#19|11,Hippocampus.Single.WGS.ON22212.Neuron-#21|48,Liver.Bulk.WGS.ON22212|11,Hippocampus.Single.RC-seq.ON22212.Neuron-#19|3,Hippocampus.Single.RC-seq.ON22212.Neuron-#21|9	Hippocampus.Single.WGS.ON22212.Neuron-#19|28,Hippocampus.Single.WGS.ON22212.Neuron-#21|52,Liver.Bulk.WGS.ON22212|9,Hippocampus.Single.RC-seq.ON22212.Neuron-#19|5,Hippocampus.Single.RC-seq.ON22212.Neuron-#21|11	ATTGATTAAGTCCATGGATTGTAGTTTGCTGACCCATGCTCTAAAACAGGGTATTTTCACCATGCTACATATAATAAAATAAATTATTATTAATTGTATACGATACAAATAAATAAATGCTGACTTTGTGACTCTTGCAAAATCTTTTTTTTTTTTTTTTTTTTTTTTTTTGTTTTAGAAGGTGTCTGGCTGCTGTCGCCCAGGCTGGGGTGGCCACAGGG	ATGATAGGGAAAGGTGTTTGGTTGCCTAGTTGTTGTTTATCAGTTTAAAGTGACTAGGCATTGTGAATTAATGTATTGAGGCTAAGAAAATATGTATAGATTTGGAAAAATTCTTCAGTCATCTTTGCCAGGCATAAAGATTTTGCGGCCGGGCGCGGTGGCTCAAGCCTGTAATCCCAGCACTTTGGGAGGCCGAGACAGGCGGATCACGAGGTCAGGAGATCGAGACCATCCTGGCTAACACGGTGAAACCCCGTCTCTACTAAAAAAAAAAAAATACAAAAAACTAGCCGGGCGAGGTGGCGGGCGCCTGTAGTCCCAGCTACTCGGGAGGCTGAGGCAGGAGAATGGCGTGAACCCAGGAGGCGGAGCTTGCAGTGAGCTGAGATCCGGCCACTG…	ATCTTTGCCAGGCATAAAGATTTTGCGGCCGGGCGCGGTGGCTCAAGCCTGTAATCCCAGCACTTTGGGAGGCCGAGACAGGCGGATCACGAGGTCAGGAGATCGAGACCATCCTGGCTAACACGGTGAAACCCCGTCTCTACTAAAAAAAAAAAAATACAAAAAACTAGCCGGGCGAGGTGGCGGGCGCCTGTAGTCCCAGCTACTCGGGAGGCTGAGGCAGGAGAATGGCGTGAACCACAGGAGGCGGAGCTTGCAGTGAGCTGAGATCCGGCCACTGCACTCCAGCCTGGGCGACAGAGCGAGACTCCGTCTCAAAAAAACAAAAAAAAAAAAAAAAAAAAAAGATTTTGAAAGAGCCACAAAAGCAACATTTTTTATTTTTAGAGTATAAAATTA…	ATCTTTGCCAGGCATAAAGATTTTGCGGCCGGGCGCGGTGGCTCAAGCCTGTAATCCCAGCACTTTGGGAGGCCGAGACAGGCGGATCACGAGGTCAGGAGATCGAGACCATCCTGGCTAACACGGTGAAACCCCGTCTCTACTAAAAAAAAAAAAATACAAAAAACTAGCCGGGCGAGGTGGCGGGCGCCTGTAGTCCCAGCTACTCGGGAGGCTGAGGCAGGAGAATGGCGTGAACCACAGGAGGCGGAGCTTGCAGTGAGCTGAGATCCGGCCACTGCACTCCAGCCTGGGCGACAGAGCGAGACTCCGTCTCAAAAAAACAAAAAAAAAAAAAAAAAAAAAAGATTTTGAAAGAGCCACAAAAGCAACATTTTTTATTTTTAGAGTATAAAATTA…
118702e0-4884-4b1e-bb28-918cded68b7e	Chr1	51941627	51941641	ALU	Alu_YRb4	0	258	-	-	N	TATTTTATGGTTTTT	Hippocampus.Single.WGS.ON22212.Neuron-#21|18,Hippocampus.Single.WGS.ON22212.Neuron-#7|7,Liver.Bulk.WGS.ON22212|12,Hippocampus.Single.RC-seq.ON22212.Neuron-#21|4,Hippocampus.Single.RC-seq.ON22212.Neuron-#7|1	Hippocampus.Single.WGS.ON22212.Neuron-#21|16,Hippocampus.Single.WGS.ON22212.Neuron-#7|3,Liver.Bulk.WGS.ON22212|17,Hippocampus.Single.RC-seq.ON22212.Neuron-#21|6,Hippocampus.Single.RC-seq.ON22212.Neuron-#7|4	TACATCAGGGTTCAAGAATTTTTAATCCTGTCCATACTTATAGATGTTATATTTTGATCATGAGTGAATATACTAAAATCTCTCTGAAGTTATTAATCATCGAAATATCTATATTGTCCAATGTATTTTTAGTTTTCATGACAAAATTAATATAACAAGTGTCCAATAGATAATACGTGTCAAATAGTGAAAATGTATTTAGTTAACTACAGCTATACTCTACAGAACTTTTGGTTAAGATTTTGTTTTATCATTAGATATTTATATGTTAAAAACCATAAAATAGGCCGGGCGCGGTGGCTCACGCCTGTAATCCCAGCACTTTGGGAGGCCGAGGCGGGCGGATCACAAGGTCAGGAGATCGAGACCACGGTGAAACCCCGTCTCTACTAAAAATAC…	TACATCAGGGTTCAAGAATTTTTAATCCTGTCCATACTTATAGATGTTATATTTTGATCATGAGTGAATATACTAAAATCTCTCTGAAGTTATTAATCATCGAAATATCTATATTGTCCAATGTATTTTTAGTTTTCATGACAAAATTAATATAACAAGTGTCCAATAGATAATACGTGTCAAATAGTGAAAATGTATTTAGTTAACTACAGCTATACTCTACAGAACTTTTGGTTAAGATTTTGTTTTATCATTAGATATTTATATGTTAAAAACCATAAAATAGGCCGGGCGCGGTGGCTCACGCCTGTAATCCCAGCACTTTGGGAGGCCGAGGCGGGCGGATCACAAGGTCAGGAGATCGAGACCACGGTGAAACCCCGTCTCTACTAAAAATAC…	ATTTATATGTTAAAAACCATAAAATAGGCCGGGCGCAGTGGCTCACGCCTGTAATCCCAGCACTTTGGGAGGCCGAGGCGGGCGGATCACAAGGTCAGGAGATCGAGACCACGGTGAAACCCCGTCTCTACTAAAAATACAAAAAATTAGCCGGGCGCGGTGGCGGGCGCCTGTAGTCCCAGCTACTCAGGAGGCTGAGGCAGGAGAATGGCGTAAACCCAGGAGGCGGAGCTTGCAGTGAGCTGAGATCGCGCCACTGCACTCCAGCCTGGGCGACAGAGCGAGACTCCGTCTCAAAAAAAAAAAAAAAAAAACAACCATAAAATATCTAAATTTTAGACAATCTTATTGATTTAGTCTAATTTATAATAAGAATTAAACACTTAAATATAAAACAAT…	ATTTATATGTTAAAAACCATAAAATAGGCCGGGCGCAGTGGCTCACGCCTGTAATCCCAGCACTTTGGGAGGCCGAGGCGGGCGGATCACAAGGTCAGGAGATCGAGACCACGGTGAAACCCCGTCTCTACTAAAAATACAAAAAATTAGCCGGGCGCGGTGGCGGGCGCCTGTAGTCCCAGCTACTCAGGAGGCTGAGGCAGGAGAATGGCGTAAACCCAGGAGGCGGAGCTTGCAGTGAGCTGAGATCGCGCCACTGCACTCCAGCCTGGGCGACAGAGCGAGACTCCGTCTCAAAAAAAAAAAAAAAAAAACAACCATAAAATATCTAAATTTTAGACAATCTTATTGATTTAGTCTAATTTATAATAAGAATTAAACACTTAAATATAAAACAAT…
51341437-e8ef-4280-808e-7b3269a0487a	Chr1	52233806	52233822	ALU	Alu_YRa4	0	270	+	+	N	AGAAATTAAATTTAAAA	Hippocampus.Single.WGS.ON22213.Neuron-#15|32,Hippocampus.Single.WGS.ON22213.Neuron-#69|7,Hippocampus.Single.WGS.ON22213.Neuron-#31|2,Liver.Bulk.WGS.ON22213|10,Hippocampus.Single.RC-seq.ON22213.Neuron-#15|10,Hippocampus.Single.RC-seq.ON22213.Neuron-#69|3,Hippocampus.Single.RC-seq.ON22213.Neuron-#31|2	Hippocampus.Single.WGS.ON22213.Neuron-#15|33,Hippocampus.Single.WGS.ON22213.Neuron-#31|8,Liver.Bulk.WGS.ON22213|14,Hippocampus.Single.RC-seq.ON22213.Neuron-#15|14	CGTGAACCCGGCTAATGGCGTGCACCCGGGTGGAGGAGCGTGCAGTGTGGTGATAACCGGCCACTGCCCCCCTGCCGGGGCGGCCTCCCAAGACTCCGTCACAAAAAAAAAAAAAAAAAAGAAAGAAATTAAATTTAAAATGAAGAGTCACTCATTCTTTCATTTTTAAAACACTAAGTATTAAAAAATACACAAATTTTTAAAACCCAGTGATATATTTACTTAATGGATAAAGAAAAGGGGAGAAGAAGGAATGAGAAGAGAAGAAAAAAA	CTAACCTCTCATTATGAAATAATTGTATAACAAATTGTTTCACTCCTATGACAAGTAATATGATAATCATACATTTGGAAAACTGTGATTATTTGCAATAATTTGATTCTTTATCAATGATGAGATGACTTACTCATCTTTTCCATACCACTATACATTTCCTAATTATTTTTTCTTTGGCTGTAAAACTATACTAGTATTTTTGGACAAAAGATGGATAAATTTTAACCCACATATTGGAGATTTTCATAAACGTATTGGCAAATTTGTTAGAAATTAAATTTAAAAGGCCGGGCGCGGTGGCTCAAGCCTGTAATCCCAGCACTTTGGGAGGCCGAGACGGGCGGATCACGAGGTCAGGAGATCGAGACCATCCTGGCTAACACAGTGAAACCCCGT…	TTTTTCTTTGGCTGTAAAACTATACTAGTATTTTTGGACAAAAGATGGATAAATTTTAACCCACATATTGGAGATTTTCATAAACGTATTGGCAAATTTGTTAGAAATTAAATTTAAAAGGCCGGGCGCGGTGGCTCAAGCCTGTAATCCCAGCACTTTGGGAGGCCGAGACGGGCGGATCACGAGGTCAGGAGATCGAGACCATCCTGGCTCACACAGTGAAACCCCGTCTCTACTAAAAAATACAAAAAAGTAGCCGGGTGAGGTGGCGGGCGCCTGTAGTCCCAGCTACTCGGGAGGCTGAAGCAGGAGAATGGCGTGAACCCGGGAGGCGGAGCTTGCAGTGAGCTGAGATCCGGCCACTGCACCCCAGCCTGGGCGGCAGAGCAAGACTCCGTC…	TTTTTCTTTGGCTGTAAAACTATACTAGTATTTTTGGACAAAAGATGGATAAATTTTAACCCACATATTGGAGATTTTCATAAACGTATTGGCAAATTTGTTAGAAATTAAATTTAAAAGGCCGGGCGCGGTGGCTCAAGCCTGTAATCCCAGCACTTTGGGAGGCCGAGACGGGCGGATCACGAGGTCAGGAGATCGAGACCATCCTGGCTCACACAGTGAAACCCCGTCTCTACTAAAAAATACAAAAAAGTAGCCGGGTGAGGTGGCGGGCGCCTGTAGTCCCAGCTACTCGGGAGGCTGAAGCAGGAGAATGGCGTGAACCCGGGAGGCGGAGCTTGCAGTGAGCTGAGATCCGGCCACTGCACCCCAGCCTGGGCGGCAGAGCAAGACTCCGTC…
e67907e8-62be-4258-a507-138442fcda3b	Chr1	53003674	53003661	ALU	Alu_YRa4	0	270	-	-	N	AGTTTTTATTATTT	Hippocampus.Single.WGS.ON22213.Neuron-#23|9,Hippocampus.Single.WGS.ON22213.Neuron-#52|5,Hippocampus.Single.WGS.ON22213.Neuron-#49|5,Liver.Bulk.WGS.ON22213|8,Hippocampus.Single.RC-seq.ON22213.Neuron-#23|2	Hippocampus.Single.WGS.ON22213.Neuron-#23|16,Hippocampus.Single.WGS.ON22213.Neuron-#52|3,Hippocampus.Single.WGS.ON22213.Neuron-#49|6,Liver.Bulk.WGS.ON22213|18,Hippocampus.Single.RC-seq.ON22213.Neuron-#23|4,Hippocampus.Single.RC-seq.ON22213.Neuron-#52|2	TCTTTAGTGTGTGCATATTCACCATTCGTTTTCCAGTGAATGCACCTTAGTTCATTATATTTCACAAATGTGTATAATGTCATTGTATGGCATTAATCATATCGTTCCTAAGCATAAGGGGTTTTAAAGTTTTTATTATTTTTTTTTTTTTTTGTTTTTTTTTTTTTTTTTTTTTTTTTGAGTACTGGTTGAAAAGCTGGT	TTTTTTTTTTTTTTTTTTTTTTTTTTTTTGAGACGGAGTCTCACGCTGTTGCCCAGCCTGGAGTGCAGTGGCGCGATCTCGGCTCACTGCAAGCTCCGCCTCCCGGGTTCCCGCCATTCTCCTGCCTCAGCCTCCTGAGTAGCTGGGACTACAGGCGCCCGCCACCGCGCCCGGCTAATTTTTTTTTTTGTATTTTTAGTAGAGACGGGGTTTCACTGTGGTCTCGATCTCCTGACCTTGTGATCCGCCCGCCTCGGCCTCCCAAAGTGCTGGGATTACAGGCTTGAGCCACCGCGCCCGGCCAGTTTTTATTATTTAAGAAAACATTATGAACATACCTGTAGATATCTTCTAGTACATATTCATACACAGCTCTCTAGGACATTAACTAGGAAATAG…	TTTTCTTAAATAATAAAAACTGGCCGGGCGCGGTGGCTCAAGCCTGTAATCCCAGCACTTTGGGAGGCCGAGGCGGGCGGATCACAAGGTCAGGAGATCGAGACCACAGTGAAACCCCGTCTCTACTAAAAATACAAAAAAAAAAATTAGCCGGGCGCGGTGGCGGGCGCCTGTAGTCCCAGCTACTCAGGAGGCTGAGGCAGGAGAATGGCGGGAACCCGGGAGGCGGAGCTTGCAGTGAGCCGAGATCGCGCCACTGCACTCCAGGCTGGGCAACAGCGTGAGACTCCGTCTCAAAAAAAAAAAAAAAAAAAAAAAAAAAAAAAAAAAAAAAAAAAAAAAAAAATTTAAAAAACATTATGA	TTTTCTTAAATAATAAAAACTGGCCGGGCGCGGTGGCTCAAGCCTGTAATCCCAGCACTTTGGGAGGCCGAGGCGGGCGGATCACAAGGTCAGGAGATCGAGACCACAGTGAAACCCCGTCTCTACTAAAAATACAAAAAAAAAAATTAGCCGGGCGCGGTGGCGGGCGCCTGTAGTCCCAGCTACTCAGGAGGCTGAGGCAGGAGAATGGCGGGAACCCGGGAGGCGGAGCTTGCAGTGAGCCGAGATCGCGCCACTGCACTCCAGGCTGGGCAACAGCGTGAGACTCCGTCTCAAAAAAAAAAAAAAAAAAAAAAAAAAAAAAAAAAAAAAAAAAAAAAAAAAATTTAAAAAACATTATGA
67e65068-45ef-497c-bb65-f2cd3cb2151f	Chr1	54381930	54381943	ALU	Alu_YRa4	0	270	-	-	N	TAATTTGCTTTTTA	Hippocampus.Single.WGS.ON22213.Neuron-#15|1,Hippocampus.Single.WGS.ON22213.Neuron-#25|3,Hippocampus.Single.WGS.ON22213.Neuron-#38|1,Hippocampus.Single.WGS.ON22213.Neuron-#39|4,Liver.Bulk.WGS.ON22213|19,Hippocampus.Single.RC-seq.ON22213.Neuron-#25|2,Hippocampus.Single.RC-seq.ON22213.Neuron-#39|1	Hippocampus.Single.WGS.ON22213.Neuron-#15|1,Hippocampus.Single.WGS.ON22213.Neuron-#25|1,Hippocampus.Single.WGS.ON22213.Neuron-#39|6,Hippocampus.Single.WGS.ON22213.Neuron-#49|1,Liver.Bulk.WGS.ON22213|12,Hippocampus.Single.RC-seq.ON22213.Neuron-#15|2	CTCTACTGAAAATGCAAAAATTAGCCAGGCACAGTAGTGGGTGCCTGTAGTCCCAACTACTAGGGAGGCTGAGGCAGGAGAATCACTTGAACCCAGGAGGCGGAGGTTGCAGTGAGCTGAAATCGCACCACTACACTCCAGCCTGGGTGACAGAGTGAGACCCTGTCTCAAAAAAAAGTAGATATGTGAAACAACAAAACAGGATACAACTAATAAATGTTAAGTTGAAGGGAATATTAAAAAGCAAATTAGGCCGGGCGCGGTGGCTCAAGCCTGTAATCCCAGCACTTTGGGAGGCCGAGGCGGGCGGATCACAAGGTCAGGAGATCGAGACCACAGTGAAACCCCGTCTCTACTAAAAATACAAAAAATTAGCCGGGCGCGGTGGCGGGCGCCTGT…	TCAGAATATACTCATAATGAGTTAGTTTTTACAAACATATTAGTGATAGAGTTGAGTATAATGGAAAGATTCAAAAAACCTAGATGGGTTTTTTAAAAGTCTTTTATTTAGTTACCCTTTTGTAAAATTGAGAATAATTTGCTTTTTATTTATTTATTTATTTATTTATTTATTTATTTTTTGAGACGGAGTCTCACGCTGTTGCCCAGGCTGGAGTGCAGTGGCGCGATCTCGGCTCACTGCAAGCTCCGCCTCCAGGGTTCCCGCC	TAGGCCGGGCGCGGTGGCTCAAGCCTGTAATCCCAGCACTTTGGGAGGCCGAGGCGGGCGGATCACAAGGTCAGGAGATCGAGACCACAGTGAAACCCCGTCTCTACTAAAAATACAAAAAATTAGCCGGGCGCGGTGGCGGGCGCCTGTAGTCCCAGCTACTCAGGAGGCTGAGGCAGGAGAATGGCGGGAACCCGGGAGGCGGAGCTTGCAGTGAGCCGAGATCGCGCCACTGCACTCCAGCCTGGGCGACAGAGCGAGACTCCGTCTCAAAAAATAAATAAATAAATAAATAAATAAATAAATAAAAAGCAAATTATTCTCAATTTTACAAAAGGGTAACTAAATAAAGACTTTTAAAAAACCCATCTAGG	TAGGCCGGGCGCGGTGGCTCAAGCCTGTAATCCCAGCACTTTGGGAGGCCGAGGCGGGCGGATCACAAGGTCAGGAGATCGAGACCACAGTGAAACCCCGTCTCTACTAAAAATACAAAAAATTAGCCGGGCGCGGTGGCGGGCGCCTGTAGTCCCAGCTACTCAGGAGGCTGAGGCAGGAGAATGGCGGGAACCCGGGAGGCGGAGCTTGCAGTGAGCCGAGATCGCGCCACTGCACTCCAGCCTGGGCGACAGAGCGAGACTCCGTCTCAAAAAATAAATAAATAAATAAATAAATAAATAAATAAAAAGCAAATTATTCTCAATTTTACAAAAGGGTAACTAAATAAAGACTTTTAAAAAACCCATCTAGG
44a492e7-b20d-488d-98dc-2775e1b0afda	Chr1	54413019	54413021	ALU	Alu_YRd4	0	270	-	-	N	CTT	Hippocampus.Single.WGS.ON22212.Neuron-#21|8,Hippocampus.Single.WGS.ON22212.Neuron-#7|46,Liver.Bulk.WGS.ON22212|21,Hippocampus.Single.RC-seq.ON22212.Neuron-#21|2,Hippocampus.Single.RC-seq.ON22212.Neuron-#7|15	Hippocampus.Single.WGS.ON22212.Neuron-#21|5,Hippocampus.Single.WGS.ON22212.Neuron-#7|19,Liver.Bulk.WGS.ON22212|11,Hippocampus.Single.RC-seq.ON22212.Neuron-#21|4,Hippocampus.Single.RC-seq.ON22212.Neuron-#7|6	GTAGAGACGGGGTTTCACCGTGTTAGCCAGGATGGTCTGGATCTCCTGACCTCGTGATCCACCCGCCTCGGCCTCCCAAAGTGCTGGGATTACAGGCGTGAGCCACCACGCCCGGCTCCTTCTTTTCTTTTTAACTATTTTGAAGAAGCTAGTTTTAGTTGTGCCTTTTGCACACAACCCTGAGCTGAGTTTTGCTTTGGAACCAAATAAGAAAATACTTTTCTAATAGAAGATTTAAGTTCTTTATAATAATTTTATAGGTTTTTTA	GTGAGAGCTGTTTATATATTCTGGATAAAAATCACTGATGAAATATATGACTTTTAAATATTTTCTCCTGTTTCACTGGTGACTTTCTCACTTTGCTGATTCTGTCCTTTGATCCTTACTCAATGTACTTTTTTCTACTCCTTCTTTTCTTTTTTTTTTTTATTTTTTTTGAGACGGAGTCTCGCTTTTTCACCCAGGCTGGAGTGCAGTGGCGCGCTTATCT	TCACAACTCAAAATAAGAAGGCAAATACTAGAATATAAAAATGAGTGAGGGGCCGGGCGCGGTGACTCACGCCTGTAATCCCAGCACTTTGGGAGGCCGAGGCGGGTGCATCACCTGAGGTCAGGTTATTGTAGGAATGGAGCTGCTTTCATC	TCACAACTCAAAATAAGAAGGCAAATACTAGAATATAAAAATGAGTGAGGGGCCGGGCGCGGTGACTCACGCCTGTAATCCCAGCACTTTGGGAGGCCGAGGCGGGTGCATCACCTGAGGTCAGGTTATTGTAGGAATGGAGCTGCTTTCATC
ff817337-0bfa-4654-8640-d315318d3882	Chr1	54863672	54863683	ALU	Alu_YRa4	0	269	-	-	N	CATTTTTTTCTT	Hippocampus.Single.WGS.ON22213.Neuron-#15|6,Hippocampus.Single.WGS.ON22213.Neuron-#71|1,Hippocampus.Single.WGS.ON22213.Neuron-#23|14,Hippocampus.Single.WGS.ON22213.Neuron-#25|7,Hippocampus.Single.WGS.ON22213.Neuron-#47|1,Liver.Bulk.WGS.ON22213|28,Hippocampus.Single.RC-seq.ON22213.Neuron-#15|2,Hippocampus.Single.RC-seq.ON22213.Neuron-#23|10,Hippocampus.Single.RC-seq.ON22213.Neuron-#25|4	Hippocampus.Single.WGS.ON22213.Neuron-#15|10,Hippocampus.Single.WGS.ON22213.Neuron-#71|1,Hippocampus.Single.WGS.ON22213.Neuron-#23|15,Hippocampus.Single.WGS.ON22213.Neuron-#25|6,Hippocampus.Single.WGS.ON22213.Neuron-#47|1,Liver.Bulk.WGS.ON22213|24,Hippocampus.Single.RC-seq.ON22212.Neuron-#19|1,Hippocampus.Single.RC-seq.ON22213.Neuron-#15|7,Hippocampus.Single.RC-seq.ON22213.Neuron-#23|8	AGTAGAGACGGGGTTTCACCATATTAGCCAGGATGGTCTCAATCTCCTGACCTCGTGATCCGCCCGTCTCGGCCTCCCAAAGTGCTGGGATTACAGGCTTGAGCCACCGCGCCCGGCCATTTTTTTCTTAAATAGATGTGAGAGCTGCTTAGTCGAAAAC	AAATAATGTAAATAATTCATGTCAATATGATACCGAATATGAGACAAGAATTATTCAGAAAAAAACTATATTTTGAGAGTATGAATAGCAAATTATAGAAATAAAATATAATCAAGCACATTATCCAGGTTATCTCATTTTTTTCTTTTTCTTTTTTTTTTTTGTTTTGAGATCGGAGTCTCGCTTTGTCGCCCAGGCTGGAGTGCGGTGGCCGGATCTCAGCTCACTGCAAGCTCCGCCTCCCGGGTTGTACGCCCATTTTCTC	CATTATCCAGGTTATCTGTTTACTAAGCAGCTCTCACATCTATTTAAGAAAAAAATGGCCGGGCGCGGTGGCTCAAGCCTGTAATCCCAGCACTTTGGGAGGCCGAGACGGGCGGATCACGAGGTCAGGAGATTGAGACCATCCTGGCTAATATGGTGAAACCCCGTCTCTACTAAAAAATACAAAAAACTAGCCGGGCGAGGTGGTGGGCGCCTGTAGTCCCAGCTACTCGGGAGGCTGATGCAGGAGAATGGCGTAAACCCGGGAGGCGGAGCTTGCAGTGAGCTGAGATCCGGCCACTGCTCTCCAGCCTGGGCGACAAAGCGAGACTCCGTCTCAAAAAAAAAAAAAAAAAAAAAAAGAAAATGAGAAAAAAATGAGATAACCTGGATAATGTGC…	CATTATCCAGGTTATCTGTTTACTAAGCAGCTCTCACATCTATTTAAGAAAAAAATGGCCGGGCGCGGTGGCTCAAGCCTGTAATCCCAGCACTTTGGGAGGCCGAGACGGGCGGATCACGAGGTCAGGAGATTGAGACCATCCTGGCTAATATGGTGAAACCCCGTCTCTACTAAAAAATACAAAAAACTAGCCGGGCGAGGTGGTGGGCGCCTGTAGTCCCAGCTACTCGGGAGGCTGATGCAGGAGAATGGCGTAAACCCGGGAGGCGGAGCTTGCAGTGAGCTGAGATCCGGCCACTGCTCTCCAGCCTGGGCGACAAAGCGAGACTCCGTCTCAAAAAAAAAAAAAAAAAAAAAAAGAAAATGAGAAAAAAATGAGATAACCTGGATAATGTGC…
a28a8a6b-f4cf-44a0-b4b5-6e9f71b61d77	Chr1	54877215	54877199	ALU	Alu_YRa4	0	270	-	-	N	TACTCCTGTATACTTTT	Hippocampus.Single.WGS.ON22212.Neuron-#10|8,Hippocampus.Single.WGS.ON22212.Neuron-#16|2,Hippocampus.Single.WGS.ON22212.Neuron-#19|21,Hippocampus.Single.WGS.ON22212.Neuron-#7|1,Liver.Bulk.WGS.ON22212|11,Hippocampus.Single.RC-seq.ON22212.Neuron-#10|1,Hippocampus.Single.RC-seq.ON22212.Neuron-#16|1,Hippocampus.Single.RC-seq.ON22212.Neuron-#19|5	Hippocampus.Single.WGS.ON22212.Neuron-#10|8,Hippocampus.Single.WGS.ON22212.Neuron-#16|3,Hippocampus.Single.WGS.ON22212.Neuron-#19|37,Liver.Bulk.WGS.ON22212|11,Hippocampus.Single.RC-seq.ON22212.Neuron-#19|10	CATATGGCAGTTTACACAGAAACTGTAGTTTCTGCCATATGTTTACACAGAAACTACAATAAAAAATTGGCTACATTTCTCACTTCTCCTATCATGTGGTCAAAGGTTATTGTTGTATACCAGCGGTGGGATACTCCTGTATACTTTTTTTTTTTTTTTTTTTTTTTTGTTTTTTTTGTTTTAGACGGATAAAACAGTTTGACAAGCGGGTGA	TTTTTTTTTTTTTTTTTTTTTTTTTTTTGAGACGGAGTCTCACGCTGTTGCCCAGGCTGGAGTGCAGTGGCGCGATCTCGGCTCACTGCAAGCTCCACCTCCCGGGTTCCCGCCATTCTCCTGCCTCAGCCTCCTGAGTAGCTGGGACTACAGGCGCCCGCCACCGCGCCCGGCTAATTTTTTTTGTATTTTTAGTAGAGACAGGGTTTCACTGTGGTCTCGATCTCCTGACCTTGTGATCCGCCCGCCTCGGCCTCCCAAAGTGCTGGGATTACAGGCTTGAGCCACCGCGCCCGGCCTACTCCTGTATACTTTTGTCGTTCATTCATGGATTCAGAGAAAGCCATGGGAATGACCTGTGGTTCAAAAAAGTGACCCAATGGCAACAAATAAAAATCA…	CGACAAAAGTATACAGGAGTAGGCCGGGCGCGGTGGCTCAAGCCTGTAATCCCAGCACTTTGGGAGGCCGAGGCGGGCGGATCACAAGGTCAGGAGATCGAGACCACAGTGAAACCCTGTCTCTACTAAAAATACAAAAAAAATTAGCCGGGCGCGGTGGCGGGCCGCCTGTAGTCCCAGCTACTCAGGAGGCTGAGGCAGGAGAATGGCGGGACCCCGGGAGGTGGAGCTTGCAGTGAGCCGAGATCGCGCCACTGCACTCCAGCCTGGGCAACAGCGTGAGACTCCGTCTCAAAAAAAAAAAAAAAAAAAAAAAAAAAAAAAAATTAAACAGAAGAAACCGGAATCCCCCCCCCGGAAAAAAAAAAAAA	CGACAAAAGTATACAGGAGTAGGCCGGGCGCGGTGGCTCAAGCCTGTAATCCCAGCACTTTGGGAGGCCGAGGCGGGCGGATCACAAGGTCAGGAGATCGAGACCACAGTGAAACCCTGTCTCTACTAAAAATACAAAAAAAATTAGCCGGGCGCGGTGGCGGGCCGCCTGTAGTCCCAGCTACTCAGGAGGCTGAGGCAGGAGAATGGCGGGACCCCGGGAGGTGGAGCTTGCAGTGAGCCGAGATCGCGCCACTGCACTCCAGCCTGGGCAACAGCGTGAGACTCCGTCTCAAAAAAAAAAAAAAAAAAAAAAAAAAAAAAAAATTAAACAGAAGAAACCGGAATCCCCCCCCCGGAAAAAAAAAAAAA
46daaf66-87db-4a74-ac75-8ff44a9cea9e	Chr1	55078913	55078901	ALU	Alu_YRa4	0	270	-	-	N	GGATTTTACTTTT	Hippocampus.Single.WGS.ON22212.Neuron-#17|17,Hippocampus.Single.WGS.ON22212.Neuron-#19|20,Hippocampus.Single.WGS.ON22212.Neuron-#21|1,Liver.Bulk.WGS.ON22212|15,Hippocampus.Single.RC-seq.ON22212.Neuron-#17|3,Hippocampus.Single.RC-seq.ON22212.Neuron-#19|3	Hippocampus.Single.WGS.ON22212.Neuron-#17|25,Hippocampus.Single.WGS.ON22212.Neuron-#19|29,Hippocampus.Single.WGS.ON22212.Neuron-#21|1,Liver.Bulk.WGS.ON22212|32,Hippocampus.Single.RC-seq.ON22212.Neuron-#17|5,Hippocampus.Single.RC-seq.ON22212.Neuron-#19|3	TTTCTATTCCTGTATTAAGTTTTCTGAGGATGATGGTTTCCAGCTTCATCCATGTCCCTTAGGGAATATATTTTTAAACTTAGGGCCAAAAAGGAACTGTCAGGACAATTATGCCCAATGTGGAATTTTTCTCTTGGATTTTACTTTTTTTTTTTTTTTTTTTTTTTTTTTGTATTGGTAGGTTGAAAGCTGTTCTGC	AGCAAATGTATTTGCTTCATGGCAGTTATTTTAATATTCTAATGATATAAATTTATTTTAAATTCTCGATAGTGAAAAATAACTTGATCAGATTTAATAACCTAAGTAGTTTTAGTGTTGGAATTCACAGAGCACTTTCCCTCATTTAAGGAGGCGGGGTAGAAGAGGGATTTATTCCTAATGAAAACACTACATAAAAGTAAAATCCGGCCGGGCGCGGTGGCTCAAGCCTGTAATCCCAGCACTTTGGGAGGCCGAGGCGGGCGGATCACGAGGTCAGGAGATCGAGACCATCCTGGCTCACACGGTGAAACCCCGTCTCTACTAAAAAATACAAAAAACTAGCCGGGCGAGGTGGCGGGCGCCTGTAGTCCCAGCTACTGGGGAGGCTGAGGCAGG…	ATGAGGAGGCGGGGTAGAAGAGGGATTTATTCCTAATGAAAACACTACATAAAAGTAAAATCCGGCCGGGCGCGGTGGCTCAAGCCTGTAATCCCAGCACTTTGGGAGGCCGAGGCGGGCGGATCACGAGGTCAGGAGATCGAGACCATCCTGGCTCACACGGTGAAACCCCGTCTCTACTAAAAAATACAAAAAACTAGCCGGGCGAGGTGGCGGGCGCCTGTAGTCCCAGCTACTGGGGAGGCTGAGGCAGGAGAATTGCGTGAACCCGGGAGGCGGAGCCTGCAGTGAGCTGAGATCCGGCCACTGCACTCCAGCCTGGGCAGCAGAGCGAGACTCCGTCTCAAACAAAAAAAAAAAAAAAAAAAAAAAAAAGTAAAATCCAATAGAAAAATTACA…	ATGAGGAGGCGGGGTAGAAGAGGGATTTATTCCTAATGAAAACACTACATAAAAGTAAAATCCGGCCGGGCGCGGTGGCTCAAGCCTGTAATCCCAGCACTTTGGGAGGCCGAGGCGGGCGGATCACGAGGTCAGGAGATCGAGACCATCCTGGCTCACACGGTGAAACCCCGTCTCTACTAAAAAATACAAAAAACTAGCCGGGCGAGGTGGCGGGCGCCTGTAGTCCCAGCTACTGGGGAGGCTGAGGCAGGAGAATTGCGTGAACCCGGGAGGCGGAGCCTGCAGTGAGCTGAGATCCGGCCACTGCACTCCAGCCTGGGCAGCAGAGCGAGACTCCGTCTCAAACAAAAAAAAAAAAAAAAAAAAAAAAAAGTAAAATCCAATAGAAAAATTACA…
9f0446d1-f1ac-4424-9e03-66761440432b	Chr1	55224210	55224195	ALU	Alu_YRa4	0	269	+	+	N	AAAAAAAATGAAGCAC	Hippocampus.Single.WGS.ON22212.Neuron-#16|6,Hippocampus.Single.WGS.ON22212.Neuron-#19|2,Hippocampus.Single.WGS.ON22212.Neuron-#21|6,Hippocampus.Single.WGS.ON22212.Neuron-#7|1,Liver.Bulk.WGS.ON22212|16,Hippocampus.Single.RC-seq.ON22212.Neuron-#16|2	Hippocampus.Single.WGS.ON22212.Neuron-#16|6,Hippocampus.Single.WGS.ON22212.Neuron-#17|2,Hippocampus.Single.WGS.ON22212.Neuron-#19|1,Hippocampus.Single.WGS.ON22212.Neuron-#21|2,Hippocampus.Single.WGS.ON22212.Neuron-#7|5,Liver.Bulk.WGS.ON22212|11,Hippocampus.Single.RC-seq.ON22212.Neuron-#16|7	GTTTTTTTGTATTTTTAGTAGAGACGGGGTTTCACTATGTTAGCCAGGATGGTCTTGATCTCCTGACCTCGTGATCCGCCGATCTCGGCCTCCCAAAGTGCTGGGATTACAGGCTTGAGCCACCGCGCCCGGCCGTGCTTCATTTTTTTTATTCTTTCTTTTTCTTTTGTTTCCTCTGACTGTATTTTCAAATAGCCTGTCTTCAAACTCACTAATTCTTTATTCTGCTTGATCAACTCTGCTAAGAGACTCTTCATACTTCTTTAGTATGTCAATTGCATTTTTCAGCTCCATAATTTCTGCTTGATTCTCTGTAATTATTTTAATCTCTTTGTTAAATTTATCTGATAGGATTCTGAATTTCTTCTCTTATTTTTAATTTCACTGGGCTTCC	CGGGAGGCGGGGGCAGGAAAATGGCGTAAACCCGGGGGGCGGGGCTTAGAGTGAGCTGAAATCCGGCCACTGCACTCCAGCCTGGGCGATAGAGCAAAACTCCGTCTCAAAAAAAAAAAAAAAAAAAATGAAGCACACCTACAATATCCAGAAAATAGTCTCAAAAGGGCAGATCTATGAGCTCTTGTCCTTAAAGATGAGGTAGAAAGAGAGATCAGGGTAAAAAGTTTATTCATAGGGATAATAGAGAACTTCCTAAACCTAGAG	GGTGAGTTTGAAGACAGGCTATTTGAAAATACAGTCAGAGGAAACAAAAGAAAAAGAAAGAATAAAAAAATGAAGCACGGCCGGGCGCGGTGGCTCAAGCCTGTAATCCCAGCACTTTGGGAGGCCGAGATCGGCGGATCACGAGGTCAGGAGATCAAGACCATCCTGGCTAACATAGTGAAACCCCGTCTCTACTAAAAATACAAAAAAACTAGCCGGGCGAGGTGGCGGGCGCCTGTAGTCCCAGCTACTCGGGAGGCTGAGGCAGGAGAATGGCGTAAACCCGGGAGGCGGAGCTTAGAGTGAGCTGAGATCCGGCCACTGCACTCCAGCCTGGGCGATAGAGCAAGACTCCGTCTCAAAAAAAAAAAAAAAAAAATGAAGCACACCTACAATATC…	GGTGAGTTTGAAGACAGGCTATTTGAAAATACAGTCAGAGGAAACAAAAGAAAAAGAAAGAATAAAAAAATGAAGCACGGCCGGGCGCGGTGGCTCAAGCCTGTAATCCCAGCACTTTGGGAGGCCGAGATCGGCGGATCACGAGGTCAGGAGATCAAGACCATCCTGGCTAACATAGTGAAACCCCGTCTCTACTAAAAATACAAAAAAACTAGCCGGGCGAGGTGGCGGGCGCCTGTAGTCCCAGCTACTCGGGAGGCTGAGGCAGGAGAATGGCGTAAACCCGGGAGGCGGAGCTTAGAGTGAGCTGAGATCCGGCCACTGCACTCCAGCCTGGGCGATAGAGCAAGACTCCGTCTCAAAAAAAAAAAAAAAAAAATGAAGCACACCTACAATATC…
acefd3b9-3c2a-43cf-ba7c-ff6f508204b4	Chr1	57003656	57003657	ALU	Alu_YRb4	0	258	+	+	N	AG	Hippocampus.Single.WGS.ON22213.Neuron-#71|5,Liver.Bulk.WGS.ON22213|15,Hippocampus.Single.RC-seq.ON22213.Neuron-#71|2	Hippocampus.Single.WGS.ON22213.Neuron-#71|6,Liver.Bulk.WGS.ON22213|11,Hippocampus.Single.RC-seq.ON22213.Neuron-#71|1	TGATAAAGCAGTCAATTCTCTAAGAAGAAATAAGAATCTTAAATATGTATGCCCCTAACAAGACAGCAATAAAATACCTTAGGCAAAAACTGGTAGAACTAAAAAGAGAAATTAGGCCGGGCACGGTGGCTCAAGCCTGTAATCCCAGCACTTTGGGAGGCCGAGACGGGCGGATCACGAGGTCAGGAGATCGAGACCATCCTGGCTAAAGCGGTGAAACCCCGTCTCTACTAAAAAAAAAAATACAAAAAAAGCTAGCCGGGCGAGGTGGTGGGCGCCTGTAGTCCCAGCTACTCGGGAGGCTGAGGCAGGAGAATGGCGTGAACCCGGGAGGCGGAGCTTGCAGTGAGCTGAGATCCCGCCACTGCACTCCAGCCTGGGCGACAGAGCGAGACTCCG…	TTACAAACATGGTTGATATAAACCCAAACTAATAGTAATATATCATGCTACTAGTAATCAAAGAAAGCTGGAATAGCTATACTAATTTAAGACAAAGCAAACTTTGGACCAGGCAAGATTGCTATCGATAAAGAAGGGTACCACATGATGATAAAGCAGTCAATTCTCTAAGAAGAAATAAGAATCTTAAATATGTATGCCCCTAACAAGACAGCAATAAAATACCTTAGGCAAAAACTGGTAGAACTAAAAAGAGAAATTAGGCCGGGCACGGTGGCTCAAGCCTGTAATCCCAGCACTTTGGGAGGCCGAGACGGGCGGATCACGAGGTCAGGAGATCGAGACCATCCTGGCTAAAGCGGTGAAACCCCGTCTCTACTAAAAAAAAAAATACAAAAA…	CAGTCAATTCTCTGAGAAGAAATAAGAATCTTAAATATGTATGCCCCTAACAAGACAGCAATAAAATACCTTAGGCAAAAACTGGTAGAACTAAAAAGAGAAATTAGGCCGGGCACGGTGGCTCAAGCCTGTAATCCCAGCACTTTGGGAGGCCGAGACGGGCGGATCACGAGGTCAGGAGATCGAGACCATCCTGGCTAAAGCGGTGAAACCCCGTCTCTACTAAAAAAAAAAATACAAAAAAAGCTAGCCGGGCGAGGTGGTGGGCGCCTGTAGTCCCAGCTACTCGGGAGGCTGAGGCAGGAGAATGGCGTGAACCCGGGAGGCGGAGCTTGCAGTGAGCTGAGATCCCGCCACTGCACTCCAGCCTGGGCGACAGAGCGAGACTCCGTCTCAAAA…	CAGTCAATTCTCTGAGAAGAAATAAGAATCTTAAATATGTATGCCCCTAACAAGACAGCAATAAAATACCTTAGGCAAAAACTGGTAGAACTAAAAAGAGAAATTAGGCCGGGCACGGTGGCTCAAGCCTGTAATCCCAGCACTTTGGGAGGCCGAGACGGGCGGATCACGAGGTCAGGAGATCGAGACCATCCTGGCTAAAGCGGTGAAACCCCGTCTCTACTAAAAAAAAAAATACAAAAAAAGCTAGCCGGGCGAGGTGGTGGGCGCCTGTAGTCCCAGCTACTCGGGAGGCTGAGGCAGGAGAATGGCGTGAACCCGGGAGGCGGAGCTTGCAGTGAGCTGAGATCCCGCCACTGCACTCCAGCCTGGGCGACAGAGCGAGACTCCGTCTCAAAA…
4f6ec7ee-a6b6-487d-b605-51d732e7259a	Chr1	57153811	57153796	ALU	Alu_YRd4	0	270	+	+	N	AAAAAATCTACATGTG	Hippocampus.Single.WGS.ON22212.Neuron-#19|12,Hippocampus.Single.WGS.ON22212.Neuron-#21|7,Hippocampus.Single.WGS.ON22212.Neuron-#7|12,Liver.Bulk.WGS.ON22212|17,Hippocampus.Single.RC-seq.ON22212.Neuron-#19|4,Hippocampus.Single.RC-seq.ON22212.Neuron-#21|3,Hippocampus.Single.RC-seq.ON22212.Neuron-#7|6	Hippocampus.Single.WGS.ON22212.Neuron-#19|11,Hippocampus.Single.WGS.ON22212.Neuron-#7|11,Hippocampus.Single.WGS.ON22213.Neuron-#23|9,Liver.Bulk.WGS.ON22212|20,Hippocampus.Single.RC-seq.ON22212.Neuron-#19|5,Hippocampus.Single.RC-seq.ON22212.Neuron-#7|4,Hippocampus.Single.RC-seq.ON22213.Neuron-#23|2	AGGGGCCACAGATCAACCGAAAAAGAAAAATGCCACACTTATCTACAGAATGTCTCCTTTACTGAATATGTATCCTTTTTTGAAGAATGAAAAGCAGCAAGTTGCTCAGACAGATAAACCGGAAGAGAGAATAAAAAATCTACATGTGGGCCGGGCGCGGTGGCTCAAGCCTGTAATCCCAGCACTTTGGAGGAGCCCCG	TGGGAGGCTGAGGCGGGAGAATGGCGTGAACCCGGGAGGCGGAGCTTGCAGTGAGCCGAGATCCACGCCACTGCACTCCAGCCTGGGAGACACAGCGAGACTCCGTCTCAAAAAAAAAAAAAAAAAATCTACATGTGTATGATATCGGACTTCCATTTTCACAGGATACTGACTGTAATTCACTCTCAAAATAGCCTCTCCAGATAT	AAGCCACACTTAGCTACAGAATGTCTCCTTTACTGAATATGTATCCTTTGTTGAAGAATGAAAAGCAGCAAGTTGCTCAGACAGATAAACCGGAAGAGAGAATAAAAAATCTACATGTGGGCCGGGCGCGGTGGCTCAAGCCTGTAATCCCAGCACTTTGGGAGGCCGAGGCGGGTGGATCACGAGGTCAGGAGATCGAGACCATCCTGGCTAACATGGTGAAACCCCGTCTCTACTAAAAATACAAAAAACTAGCCGGGCGTGGTGGCGGGCGCCTGTAGTCTCAGCTACTTGGGAGGCTGAGGCGGGAGAATGGCGTGAACCCGGGAGGCGGAGCTTGCAGTGAGCCGAGATCCACGCCACTGCACTCCAGCCTGGGAGACACAGCGAGACTCCGTC…	AAGCCACACTTAGCTACAGAATGTCTCCTTTACTGAATATGTATCCTTTGTTGAAGAATGAAAAGCAGCAAGTTGCTCAGACAGATAAACCGGAAGAGAGAATAAAAAATCTACATGTGGGCCGGGCGCGGTGGCTCAAGCCTGTAATCCCAGCACTTTGGGAGGCCGAGGCGGGTGGATCACGAGGTCAGGAGATCGAGACCATCCTGGCTAACATGGTGAAACCCCGTCTCTACTAAAAATACAAAAAACTAGCCGGGCGTGGTGGCGGGCGCCTGTAGTCTCAGCTACTTGGGAGGCTGAGGCGGGAGAATGGCGTGAACCCGGGAGGCGGAGCTTGCAGTGAGCCGAGATCCACGCCACTGCACTCCAGCCTGGGAGACACAGCGAGACTCCGTC…
0cd2fc0e-962f-4ec9-b7ab-475d4133dfc8	Chr1	57452903	57452889	ALU	Alu_YRa4	0	269	+	+	N	AAAAACGCAAAAAGA	Hippocampus.Single.WGS.ON22213.Neuron-#14|1,Hippocampus.Single.WGS.ON22213.Neuron-#15|2,Hippocampus.Single.WGS.ON22213.Neuron-#69|1,Hippocampus.Single.WGS.ON22213.Neuron-#71|1,Hippocampus.Single.WGS.ON22213.Neuron-#23|2,Hippocampus.Single.WGS.ON22213.Neuron-#39|12,Hippocampus.Single.WGS.ON22213.Neuron-#52|12,Hippocampus.Single.WGS.ON22213.Neuron-#47|2,Liver.Bulk.WGS.ON22213|28,Hippocampus.Single.…	Hippocampus.Single.WGS.ON22212.Neuron-#21|1,Hippocampus.Single.WGS.ON22213.Neuron-#15|3,Hippocampus.Single.WGS.ON22213.Neuron-#69|1,Hippocampus.Single.WGS.ON22213.Neuron-#71|1,Hippocampus.Single.WGS.ON22213.Neuron-#23|1,Hippocampus.Single.WGS.ON22213.Neuron-#39|9,Hippocampus.Single.WGS.ON22213.Neuron-#52|10,Liver.Bulk.WGS.ON22213|16,Hippocampus.Single.RC-seq.ON22213.Neuron-#15|3,Hippocampus.Singl…	TGTAGAAATGGCCAGGCACAGTGGCTCATGCCTGTAATTTAGCCCTCTGGGAGGCTGAGATGGGAGGATCACTTGAGGCCAGGAGTTCGAGACAAACCTGGGCAACACAGTGAGACCCCCATCTCTATTTTTTAAAAACGCAAAAAGAGGCCGGGCGCGGTGGCTCAAGCCTGTAATCCCAGCACTTTGGGAGGCCGAGACGGGCGGATCACGAGGTTGAGTT	GGTTGAGGCTCGAGATTGGCTTGAACCGGGGCGGGGGAGGTTTCTTGGCTCTTATAACCGGCCAATTAAATCCAGCCTGGGCGGCAGACCTACACACCTACTAAAAAAAAAAAAAAAAAAAAAAAAAAAAACGCAAAAAGAAAAAATGAAGATAAAAAAGTGAACATGTAGAAATAATATGTGAGTGTATAGACGTAAAGAAGGCTTGAAAATGTAGTCAAAAATCACATTTCTAATAACACAGCTGTTCCAATTCTAATGTATCTTCCT	AGATGGGAGGATCACTTGAGGCCAGGAGTTCGAGACAAACCTGGGCAACACAGTGAGACCCCCATCTCTATTTTTTAAAAACGCAAAAAGAGGCCGGGCGCGGTGGCTCAAGCCTGTAATCCCAGCACTTTGGGAGGCCGAGACGGGCGGATCACGAGGTCAGGAGATCGAGACCATCCTGGCTGACACGGTGAAACCCCGTCTCTACTAAAAAATACAAAAAACTAGCCGGGCGAGGTGGCGGGCGCCTGTAATCCCAGCTACTCGGGAGGCTGAGGCAGGAGAATGGCGCTCTT	AGATGGGAGGATCACTTGAGGCCAGGAGTTCGAGACAAACCTGGGCAACACAGTGAGACCCCCATCTCTATTTTTTAAAAACGCAAAAAGAGGCCGGGCGCGGTGGCTCAAGCCTGTAATCCCAGCACTTTGGGAGGCCGAGACGGGCGGATCACGAGGTCAGGAGATCGAGACCATCCTGGCTGACACGGTGAAACCCCGTCTCTACTAAAAAATACAAAAAACTAGCCGGGCGAGGTGGCGGGCGCCTGTAATCCCAGCTACTCGGGAGGCTGAGGCAGGAGAATGGCGCTCTT
9138ff23-8753-4199-b5b8-e2ef26ba9550	Chr1	57682199	57682214	ALU	Alu_YRb4	0	258	+	+	N	AAGAATACTGAGATAG	Hippocampus.Single.WGS.ON22212.Neuron-#10|3,Hippocampus.Single.WGS.ON22212.Neuron-#19|1,Liver.Bulk.WGS.ON22212|15	Hippocampus.Single.WGS.ON22212.Neuron-#10|11,Hippocampus.Single.WGS.ON22212.Neuron-#17|3,Hippocampus.Single.WGS.ON22212.Neuron-#21|1,Hippocampus.Single.WGS.ON22212.Neuron-#37|1,Liver.Bulk.WGS.ON22212|12,Hippocampus.Single.RC-seq.ON22212.Neuron-#10|1	TGGTTTTGGCTTTAGAAGGGGGTGACCCGGGGTGGGGTTGCTTGTTTTGACCCGTTACCGCGAAAGTGAACTCCACCTTGGGCCACTTTGGTGTACTCGGATGAAAAAAAAAAAAAAAAAAAAAAAAGAATACTGAGATAGTTTGTGTTTATTTTGGAGCTACTTGTTTTGCACCTGTGCTGTAGGCCAATCCCATCCTCATCCAATTCTTTTAACAGAGAAAGCAAAAGTAGATTACGGGAAACCTGGGAATGTTTTCACAAATAGTA	TATTTTTAAATAACCTACAATGTGACGTTCTAGTTCAACAAATTCACCACTAATAACTTTTTTATTGGTGAGGGTAGATGGAACGTGTTCTCTCTAGTTGTGTAAATCGTGTAGTCAAAAGGTGAGGAAATTTTGCCTATCTCTCCTTTCACCAGATAAACAGTTGTCAAGAGTTTTCATTACCACCTATGCTTACATCATTATTCCACACTTCTACTGAGTGTGAAGAATACTGAGATAGGCCGGGCGCGGTGGCTCACGCCTGTAATCCCAGCACTTTGGGAGGCCGAGGCGGGCGGATCACAAGGTCAGGAGATCGAGACCACGGTGTAAACCCCGTCTCTACTAAAAATACAAAAAATTAGCTGGGCGCGGTTGTGGGCGCCTGTAGTCCCAGCT…	GGTCAAGAGTTTTCATTACCACCTATGCTTACATCATTATTCCACACTTCTACTGAGTGTGAAGAATACTGAGATAGGCCGGGCGCGGTGGCTCACGCCTGTAATCCCAGCACTTTGGGAGGCCGAGGCGGGCGGATCACAAGGTCAGGAGATCGAGACCACGGTGTAAACCCCGTCTCTACTAAAACTCCA	GGTCAAGAGTTTTCATTACCACCTATGCTTACATCATTATTCCACACTTCTACTGAGTGTGAAGAATACTGAGATAGGCCGGGCGCGGTGGCTCACGCCTGTAATCCCAGCACTTTGGGAGGCCGAGGCGGGCGGATCACAAGGTCAGGAGATCGAGACCACGGTGTAAACCCCGTCTCTACTAAAACTCCA
5791674f-58ab-4ce4-9eee-44f84c6359d4	Chr1	59854338	59854353	ALU	Alu_YRb4	0	257	-	-	N	GAAGTGAAAGGTTTCT	Hippocampus.Single.WGS.ON22212.Neuron-#19|16,Hippocampus.Single.WGS.ON22212.Neuron-#21|3,Hippocampus.Single.WGS.ON22212.Neuron-#7|1,Liver.Bulk.WGS.ON22212|20,Hippocampus.Single.RC-seq.ON22212.Neuron-#19|5,Hippocampus.Single.RC-seq.ON22212.Neuron-#21|2,Hippocampus.Single.RC-seq.ON22212.Neuron-#7|1	Hippocampus.Single.WGS.ON22212.Neuron-#19|12,Hippocampus.Single.WGS.ON22212.Neuron-#21|2,Hippocampus.Single.WGS.ON22212.Neuron-#7|2,Liver.Bulk.WGS.ON22212|9,Hippocampus.Single.RC-seq.ON22212.Neuron-#19|6,Hippocampus.Single.RC-seq.ON22212.Neuron-#21|4	TTTTTGTATTTTTAGTAGAGACGGGGTTTCACTGTGGTCTCGATCTCCTGACCTTGTGATCCGCCCGCCTCGGCCTCCCAAAGTGCTGGGATTACAGGCTTGAGCCACCGCGCCCGGCCTTGAAGTGAAAGGTTTCTAGAAGGGAAAGAGAAGGGAGAGAGTTCCACCTAGTTGGAAGAAACAAGCTGTGGAAGAGAGCTGGGATGTTGA	GGTCTAGAATTAGTGTTTGTTGGGGAGGAGAAGAAGAAGGATGGGGTTAAAGGAAGGAAAGAGGGAATTCAGTGTGTGAGAACAGGCAAAGCTTTCATGAAGGCAAAAGCATTTTAAATGAACTTTGAAAGAAGTGAAAGGTTTCTTTTTTTTTTTTTTTTTTTTTTTTTTGAGACGGAGTCTTGGCTCTTTAGCCAGGCGGGAGTGCCGAGTGGCGCGATCTCGGCTCACTGCAAGCTCCCCCAC	CTAGAAACCTTTCACTTCAAGGCCGGGCGCGGTGGCTCAAGCCTGTAATCCCAGCACTTTGGGAGGCCGAGGCGGGCGGATCACAAGGTCAGGAGATCGAGACCACAGTGAAACCCCGTCTCTACTAAAAATACAAAAAAATTAGCCGGGCGCGGTGGCGGGCGCCTGTAGTCCCAGCTACTCAGGAGGCTGAGGCAGGAGACTGGCGGGAACCCGGGAGGCGGAGCTTGCAGTGAGCCGAGATCGCGCCACTGCACTCCAGCCTGGCGACAGAGCGAGACTCCGTCTCAAAAAAAAAAAAAAAAAAAAAAAAAAAAAAACCTTTCACTTCTTTCAAAGTTCATTTAAAATGCTTTTGCCTTCATGAAAGCTTTGCCTGTTCTCACACACTGAATTCCC…	CTAGAAACCTTTCACTTCAAGGCCGGGCGCGGTGGCTCAAGCCTGTAATCCCAGCACTTTGGGAGGCCGAGGCGGGCGGATCACAAGGTCAGGAGATCGAGACCACAGTGAAACCCCGTCTCTACTAAAAATACAAAAAAATTAGCCGGGCGCGGTGGCGGGCGCCTGTAGTCCCAGCTACTCAGGAGGCTGAGGCAGGAGACTGGCGGGAACCCGGGAGGCGGAGCTTGCAGTGAGCCGAGATCGCGCCACTGCACTCCAGCCTGGCGACAGAGCGAGACTCCGTCTCAAAAAAAAAAAAAAAAAAAAAAAAAAAAAAACCTTTCACTTCTTTCAAAGTTCATTTAAAATGCTTTTGCCTTCATGAAAGCTTTGCCTGTTCTCACACACTGAATTCCC…
68a2e00c-0526-431b-bdfc-b7485973b32e	Chr1	60381926	60381937	ALU	Alu_YRa4	0	270	-	-	N	GGATTATTTTTT	Hippocampus.Single.WGS.ON22212.Neuron-#19|15,Liver.Bulk.WGS.ON22212|17,Hippocampus.Single.RC-seq.ON22212.Neuron-#19|5,Hippocampus.Single.RC-seq.ON22213.Neuron-#52|1	Hippocampus.Single.WGS.ON22212.Neuron-#19|17,Liver.Bulk.WGS.ON22212|18,Hippocampus.Single.RC-seq.ON22212.Neuron-#19|3	GAGACGGGGTTTCACTGTGTTACCCAGGATGGTCTCGATCTCCTGACCTCGTGATCCGCCCGTCTCGGCCTCCCAAAGTGCTGGGATTACAGGCTTGAGCCACCGCGCCCGGCCGGATTATTTTTTTAAAAGGATAATTTGTTCTTCCACTGTAGAAACTTGACCCTTGATGTGAACCCAACCTTAACTCAAGAAGACTGCCCTTAAACTGCCTGTATTAGCTGAGAAGTGATTACTGCTATCTTGTGCTATATAATGAACA	ACTCAATATTAGGCTTCTAATTTGGTTTCAGTCTGGTCAGAGTGGGACAGTTTATCATTTTGGTTTTAATTTACATTTCCCTGGTTACCACTTGAGGCAGAGAAACTTTTCCTGTTGGTGTAGGTGGATTTTTTTTTATTTTTTTTTTTTTTATTTTTTATTTTTTGAGACGGAGTCTCGCTCTGTCACCCAGGCTGGAGTGCAGTGGCCGGATCTCAGCTCACTGCAAGCTCCGCCTCCCGGGTTCACGC	AAGAACAAATTATCCTTTTAAAAAAATAATCCGGCCGGGCGCGGTGGCTCAAGCCTGTAATCCCAGCACTTTGGGAGGCCGAGACGGGCGGATCACGAGGTCAGGAGATCGAGACCATCCTGGGTAACACAGTGAAACCCCGTCTCTACTAAAAAAATACAAAAACTTAGCCGGGCGAGGTGGCGGGCGCCTGTAGTCCCAGCTACTCGGGAGGCTGAGGCAGGAGAATGGCGTGAACCCGGGAGGCGGAGCTTGCAGTGAGCTGAGATCCGGCCACTGCACTCCAGCCTGGGTGACAGAGCGAGACTCCGTCTCAAAAAATAAAAAATAAAAAAAAAAAAAATAAACAAAAAATCCACCTACACCAACAGGAAAAGTTTCTCTGCCTCAAGTGGTAAC…	AAGAACAAATTATCCTTTTAAAAAAATAATCCGGCCGGGCGCGGTGGCTCAAGCCTGTAATCCCAGCACTTTGGGAGGCCGAGACGGGCGGATCACGAGGTCAGGAGATCGAGACCATCCTGGGTAACACAGTGAAACCCCGTCTCTACTAAAAAAATACAAAAACTTAGCCGGGCGAGGTGGCGGGCGCCTGTAGTCCCAGCTACTCGGGAGGCTGAGGCAGGAGAATGGCGTGAACCCGGGAGGCGGAGCTTGCAGTGAGCTGAGATCCGGCCACTGCACTCCAGCCTGGGTGACAGAGCGAGACTCCGTCTCAAAAAATAAAAAATAAAAAAAAAAAAAATAAACAAAAAATCCACCTACACCAACAGGAAAAGTTTCTCTGCCTCAAGTGGTAAC…
7c6d607e-d271-4c94-b1f9-16b974af3086	Chr1	64883452	64883438	ALU	Alu_YRb4	0	257	+	+	N	AAAACAAAAGCTGTG	Hippocampus.Single.WGS.ON22212.Neuron-#10|1,Hippocampus.Single.WGS.ON22212.Neuron-#17|1,Hippocampus.Single.WGS.ON22212.Neuron-#21|13,Liver.Bulk.WGS.ON22212|35,Hippocampus.Single.RC-seq.ON22212.Neuron-#17|4,Hippocampus.Single.RC-seq.ON22212.Neuron-#21|6	Hippocampus.Single.WGS.ON22212.Neuron-#17|1,Hippocampus.Single.WGS.ON22212.Neuron-#21|13,Liver.Bulk.WGS.ON22212|35,Hippocampus.Single.RC-seq.ON22212.Neuron-#21|4	AAAGCCGCAAAAATAAGAAAAAAAGGAAATAATGATTTAAAATAGATAATGAAGAAACTAAGATACAGACATTAAATAAAATGTAAATAGATTATTTTATTTCACTAAAGCTTAAAGACATAGTTTGGTTTAGAAAACAAAAGCTGTGGGCCGGGCGCGGTGGCTCACGCCTGTAATCCCAGCACTTTGGGAGGCCGAGGCGGGCGAGGAGGTCGCTTGAGGCCAGGAGTTCAAGACCAGCCTGTGCAACACAGCAAGACCCTGTCT	GTGGCTGTGGCTGGTTTTTGGGGTGAACCCGGGAGGGGGTGTTTGCAGTGTGCCGATATCGCGCCAATGCACTACAGCCTGGGCGAAATAGCGTTACTCCGTCTAAAAAAAAAAAAAAAAAAAAAAAACAAAAGCTGTGTATGAGGGACATGGTGAAATAGTAAAGGGTGGAAAATAAAAGATAAGTAAATGTTAA	TAATGATTTAAAATAGATAATGAAGAAACTAAGATACAGACATTAAATAAAATGTAAATAGATTATTTTATTTCACTAAAGCTTAAAGACATAGTTTGGTTTAGAAAACAAAAGCTGTGGGCCGGGCGCGGTGGCTCACGCCTGTAATCCCAGCACTTTGGGAGGCCGAGGCGGGCGGATCACAAGGTCAGGAGATCGAGACCACGGTGAAACCCCGTCTCTACTAAAAATACAAAAAATTAGCCGGGCGCGGTTGTGGGCGCCTGTAGTCCCAGCTACTCGGGAGGCTGAGGCAGGAGAATGGCGTGAACCCGGGAGGCGGAGCTTGCAGTGAGCCGAGATCGCGCCACTGCACTCCAGCCTGGGCGACAGAGCGAGACTCCGTCTCAAAAAAAAAAA…	TAATGATTTAAAATAGATAATGAAGAAACTAAGATACAGACATTAAATAAAATGTAAATAGATTATTTTATTTCACTAAAGCTTAAAGACATAGTTTGGTTTAGAAAACAAAAGCTGTGGGCCGGGCGCGGTGGCTCACGCCTGTAATCCCAGCACTTTGGGAGGCCGAGGCGGGCGGATCACAAGGTCAGGAGATCGAGACCACGGTGAAACCCCGTCTCTACTAAAAATACAAAAAATTAGCCGGGCGCGGTTGTGGGCGCCTGTAGTCCCAGCTACTCGGGAGGCTGAGGCAGGAGAATGGCGTGAACCCGGGAGGCGGAGCTTGCAGTGAGCCGAGATCGCGCCACTGCACTCCAGCCTGGGCGACAGAGCGAGACTCCGTCTCAAAAAAAAAAA…
488b504d-3511-4d7e-af99-bb8191737d7f	Chr1	66395517	66395502	ALU	Alu_YRa4	0	270	+	+	N	AGAATTTTTGATGGAT	Hippocampus.Single.WGS.ON22213.Neuron-#15|3,Hippocampus.Single.WGS.ON22213.Neuron-#69|11,Hippocampus.Single.WGS.ON22213.Neuron-#31|33,Hippocampus.Single.WGS.ON22213.Neuron-#52|1,Liver.Bulk.WGS.ON22213|17,Hippocampus.Single.RC-seq.ON22213.Neuron-#15|3,Hippocampus.Single.RC-seq.ON22213.Neuron-#69|3,Hippocampus.Single.RC-seq.ON22213.Neuron-#31|13	Hippocampus.Single.WGS.ON22213.Neuron-#15|2,Hippocampus.Single.WGS.ON22213.Neuron-#69|6,Hippocampus.Single.WGS.ON22213.Neuron-#31|32,Hippocampus.Single.WGS.ON22213.Neuron-#38|9,Liver.Bulk.WGS.ON22213|8,Hippocampus.Single.RC-seq.ON22213.Neuron-#15|2,Hippocampus.Single.RC-seq.ON22213.Neuron-#69|3,Hippocampus.Single.RC-seq.ON22213.Neuron-#31|21,Hippocampus.Single.RC-seq.ON22213.Neuron-#38|4	TTTTTTTTTTTTTTTTTTTTGAGACGGAGTCTCGCTCTGTCACCCAGGCTGGATTGCACCTCAGCTCACTGCAAGCTCCGCCTCCCGGGTTTACGCCATTCTCCTGCCTCAGCCTCCCGAGTAGCTGGGACTACAAGCGCCTGCCACCTCGCCCGGCTAGTTTTTTTTTTGTATTTTTTAGTAGAGACGGGGTTTCACGGTGTTCGCCAGGATGGTCTCGATCTCCTGACCTCGTGATCCGCCCGTCTCGGCCTCCCAAAGTGCTGGGATTACAGGCTTGAGCCACCGCGCCCGGCATCCATCAAAAATTCTATCATTTATCTTAAACTCTACCACTTAATACCATCTCTGCTGCTACCACCCAGGTTTGAACCTTCACCATTTCTTGTTTCTATTTTT…	GGGGAGGCTGAGGCAGGAGAATGGCGTAAACCCGGGAGGCGGAGCGTGCAGGGAGCTGAGGTGCAATCCAGCCTGGGTGACAGAGCGAGACTCCGTCTCAAAAAAAAAAAAAAAAAAGAATTTTTGATGGATTGAAAATGTAGTATAACAGGAAGGGAGGAATCAAGGATAACATCTATGAGTGCTTGGCCTGAGCAACTCGTGTGAGAGT	GATGGTATTAAGTGGTAGAGTTTAAGATAAATGATAGAATTTTTGATGGAGGCCGGGCGCGGTGGCTCAAGCCTGTAATCCCAGCACTTTGGGAGGCCGAGACGGGCGGATCACGAGGTCAGGAGATCGAGACCATCCTGGCGAACACCGTGAAACCCCGTCTCTACTAAAAAATACAAAAAAAAAACTAGCCGGGCGAGGTGGCAGGCGCTTAGTAGTCCCAGCTACTCGGGAGGCGGAGGCAGGAGAATGGCGTAAACCCGGGAGGCGGAGGTCTCTTGCAGTGAGCTGAGGTGCAATCCAGCCTGGGTGACAGAGCGAGACTCCGTCTCAAAAAAAAAAAAAAAAAAAAGAATTTTTGATGGATTGAAAATGTAGTATAACAGGAAGGGAGGAATC…	GATGGTATTAAGTGGTAGAGTTTAAGATAAATGATAGAATTTTTGATGGAGGCCGGGCGCGGTGGCTCAAGCCTGTAATCCCAGCACTTTGGGAGGCCGAGACGGGCGGATCACGAGGTCAGGAGATCGAGACCATCCTGGCGAACACCGTGAAACCCCGTCTCTACTAAAAAATACAAAAAAAAAACTAGCCGGGCGAGGTGGCAGGCGCTTAGTAGTCCCAGCTACTCGGGAGGCGGAGGCAGGAGAATGGCGTAAACCCGGGAGGCGGAGGTCTCTTGCAGTGAGCTGAGGTGCAATCCAGCCTGGGTGACAGAGCGAGACTCCGTCTCAAAAAAAAAAAAAAAAAAAAGAATTTTTGATGGATTGAAAATGTAGTATAACAGGAAGGGAGGAATC…
2a183058-9c54-495d-914e-e450e8fae29a	Chr1	66692581	66692588	ALU	Alu_YRa4	0	270	+	+	N	AGAAAATA	Hippocampus.Single.WGS.ON22212.Neuron-#16|21,Hippocampus.Single.WGS.ON22212.Neuron-#19|1,Hippocampus.Single.WGS.ON22212.Neuron-#21|2,Liver.Bulk.WGS.ON22212|9,Hippocampus.Single.RC-seq.ON22212.Neuron-#16|25,Hippocampus.Single.RC-seq.ON22212.Neuron-#21|1	Hippocampus.Single.WGS.ON22212.Neuron-#16|37,Hippocampus.Single.WGS.ON22212.Neuron-#21|4,Liver.Bulk.WGS.ON22212|14,Hippocampus.Single.RC-seq.ON22212.Neuron-#16|17,Hippocampus.Single.RC-seq.ON22212.Neuron-#19|1	TGTGGCCGTGGCCGTTTCATGGGGGTAACCCGGGAGGCGGCGCTTGGATGGCCCCGTGATCGCGCAACAGCCCCCCACCCGTGGCAAAACTCTGTCCCCCCCACACAAAAAAAAAAAAAAAAAAAAAAAGAAAATACTTATGAATACATTGTATTACACTTTCCTGATGTACTACAGTTTATTTAAAAAGTCATCCACTAGAGGAAATTTAGATCGTTAACAACAACTTTTGATTATTTAAAATTTTGACATATAGATGTATACATTTGTGTGACTACA	TTTTTTTTTTTTTTTTTTTTTGAGACGGAGTCTCACTCTGTTGCCCAGGCTGGAGTGCAGTGGCGCGATCTCGGCTCACTGCAAGCTCCGCCTCCCGGGTTCCCACCATTCTCCTGCCTCAGCCTCCTGAGTAGCTGGGACTACAGGCGCCCGCCACCGCGCCCGGCTAATTTTTTGTATTTTTAGTAGAGACGGGGTTTCACTGTGGTCTCGATCTCCTGACCTTGTGATCCACCCGCCTCGGCCTCCCAAAGTGCTGGGATTACAGGCTTGAGCCACCGCGCCCGGCCTATTTTCTAAGATCTTATTAAAGATCTTAGAACCTTTTCTCTAAGATACCTTAAGTAGAAAAAATTAAGGTGTATGTGCAAGTGCACGTGTGTGTGTGTGTGTGTGCAT…	CATACACACACATGCACACACACACACACACACGTGCACTTGCACATACACCTTAATTTTTTCTACTTAAGGTATCTTAGAGAAAAGGTTCTAAGATCTTTAATAAGATCTTAGAAAATAGGCCGGGCGCGGTGGCTCAAGCCTGTAATCCCAGCACTTTGGGAGGCCGAGGCGGGTGGATCACAAGGTCAGGAGATCGAGACCACAGTGAAACCCCGTCTCTACTAAAAATACAAAAAATTAGCCGGGCGCGGTGGCGGGCGCCTGTAGTCCCAGCTACTCAGGAGGCTGAGGCAGGAGAATGGTGGGAACCCGGGAGGCGGAGCTTGCAGTGAGCCGAGATCGCGCCACTGCACTCCAGCCTGGGCAACAGAGTGAGACTCCGTCTCAAAAAAAAAA…	CATACACACACATGCACACACACACACACACACGTGCACTTGCACATACACCTTAATTTTTTCTACTTAAGGTATCTTAGAGAAAAGGTTCTAAGATCTTTAATAAGATCTTAGAAAATAGGCCGGGCGCGGTGGCTCAAGCCTGTAATCCCAGCACTTTGGGAGGCCGAGGCGGGTGGATCACAAGGTCAGGAGATCGAGACCACAGTGAAACCCCGTCTCTACTAAAAATACAAAAAATTAGCCGGGCGCGGTGGCGGGCGCCTGTAGTCCCAGCTACTCAGGAGGCTGAGGCAGGAGAATGGTGGGAACCCGGGAGGCGGAGCTTGCAGTGAGCCGAGATCGCGCCACTGCACTCCAGCCTGGGCAACAGAGTGAGACTCCGTCTCAAAAAAAAAA…
e2f5e240-d56b-4546-9f5b-e190732cd36d	Chr1	68309858	68309844	ALU	Alu_YRb4	0	258	+	+	N	AAGAGTTCCAGTGTC	Hippocampus.Single.WGS.ON22212.Neuron-#19|23,Liver.Bulk.WGS.ON22212|21,Hippocampus.Single.RC-seq.ON22212.Neuron-#19|11,Hippocampus.Single.RC-seq.ON22213.Neuron-#10|1	Hippocampus.Single.WGS.ON22212.Neuron-#19|15,Hippocampus.Single.WGS.ON22212.Neuron-#37|1,Liver.Bulk.WGS.ON22212|11,Hippocampus.Single.RC-seq.ON22212.Neuron-#19|6	TTCAATTCTTTTGTTTCTATACCTAGGAGTGAAATTGCTGGGTCATATGGTTACTACGTTTCACATGTTGGAGAAATTGCAGAATTGATTCCGAAAGTAACTGCACTACTTTACATTCCTGCCAGCAGTATATAAGAGTTCCAGTGTCGGCCGGGCGTGGTGGCTCACGCCTGTAATCCCAACACTTTGGGAGGCCGAGGTGGGCGGATCACAAGGTCAGGAGATTGAGACCATGGTGAAACCCCGTCTCTACTAAAAATAGAAAAAAT	GGAGAATGGCGTGAACCCGGGAGGCGGAGCTTGCAGTGAGCCGAGATCGCGCCACTGCACTCCAGCCTGGGCTACAGAGCGAGACTCCGTCTCAAAAAAAAAAAAACAAAAACAAAAACAAAGAGTTCCAGTGTCTCAATATCCTCCATTAACATTTTGGTGTTA	TCATATGGTTACTACGTTTCACATGTTGGAGAAATTGCAGAATTGATTCCGAAAGTAACTGCACTACTTTACATTCCTGCCAGCAGTATATAAGAGTTCCAGTGTCGGCCGGGCGTGGTGGCTCACGCCTGTAATCCCAGCACTGTGGGAGGCCGAGGTGGGCGGATCACAAGGTCAGGAGATTGAGACCATGGTGAAACCCCGTCTCTACTAAAAATAGAAAAAATTAGCCGGGCGCAGGGGCGGGCGCCTGTAGTCCCAGCTACTCGGGAGGCTGAGGCAGGAGAATGGCGTGAACCCGGGAGGCGGAGCTTGCAGTGAGCCGAGATCGCGCCACTGCACTCCAGCCTGGGCTACAGAGCGAGACTCCGTCTCAAAAAAAAAAAAACAAAAACAAAA…	TCATATGGTTACTACGTTTCACATGTTGGAGAAATTGCAGAATTGATTCCGAAAGTAACTGCACTACTTTACATTCCTGCCAGCAGTATATAAGAGTTCCAGTGTCGGCCGGGCGTGGTGGCTCACGCCTGTAATCCCAGCACTGTGGGAGGCCGAGGTGGGCGGATCACAAGGTCAGGAGATTGAGACCATGGTGAAACCCCGTCTCTACTAAAAATAGAAAAAATTAGCCGGGCGCAGGGGCGGGCGCCTGTAGTCCCAGCTACTCGGGAGGCTGAGGCAGGAGAATGGCGTGAACCCGGGAGGCGGAGCTTGCAGTGAGCCGAGATCGCGCCACTGCACTCCAGCCTGGGCTACAGAGCGAGACTCCGTCTCAAAAAAAAAAAAACAAAAACAAAA…
088a0dd1-0bf0-4269-bbbf-6ed54e141506	Chr1	68521243	68521227	ALU	Alu_YRa4	0	269	+	+	N	AAAAGAATAATAATCGG	Hippocampus.Single.WGS.ON22212.Neuron-#21|6,Hippocampus.Single.WGS.ON22213.Neuron-#15|5,Hippocampus.Single.WGS.ON22213.Neuron-#69|1,Hippocampus.Single.WGS.ON22213.Neuron-#25|1,Hippocampus.Single.WGS.ON22213.Neuron-#38|1,Hippocampus.Single.WGS.ON22213.Neuron-#39|1,Hippocampus.Single.WGS.ON22213.Neuron-#49|4,Liver.Bulk.WGS.ON22212|18,Liver.Bulk.WGS.ON22213|15,Hippocampus.Single.RC-seq.ON22212.Neuro…	Hippocampus.Single.WGS.ON22212.Neuron-#21|2,Hippocampus.Single.WGS.ON22212.Neuron-#7|3,Hippocampus.Single.WGS.ON22213.Neuron-#15|4,Hippocampus.Single.WGS.ON22213.Neuron-#25|2,Hippocampus.Single.WGS.ON22213.Neuron-#38|1,Hippocampus.Single.WGS.ON22213.Neuron-#39|1,Hippocampus.Single.WGS.ON22213.Neuron-#49|6,Liver.Bulk.WGS.ON22212|19,Liver.Bulk.WGS.ON22213|13,Hippocampus.Single.RC-seq.ON22212.Neuron…	GGCGAGGGAGAAGATGCTAGATGAGCTCTGAAAGGAAAACGGAAACTAGTCCACACAGGACCCAGTGGGATATTGGGAGGTGTTAGATTTTATTCTATGTACGGCTGGGTGTAACCAGAGGGTTTTAGGTAAAAGAATAATAATCGGGGCCGGGCGCGGTGGCTCAAGCCTGTAATCCCAGCACTTTGGGAGGCCGAGACAGGCGGATCACAAGGTCAGGAGATCGAGAGCCACTTCTCCTTGAAAGATACGGCGACCACCG	GTTATTGGGGGTTACCGGGGTGGGGGTGCTTTCTTTTTGCTGTTTTCTGGAAACTGATATCCTGCCTGGGGGTAATTTCGATACTCCGTCTAAAAAAAAAAAAAAAAAAAAAAAAAAAAAAAAGAATAATAATCGGATGCATGTTTCTAAAATAACACCCTGGCTGCTTTCTAGATAATGAGTTGGTACAAAGGATTGAGGGAAGAATATAATCTGGGTACTTGTTATAACAGAGAAAAATTGATGAGTGAAA	GAAACTAGTCCACACAGGACCCAGTGGGATATTGGGAGGTGTTAGATTTTATTCTATGTACGGCTGGGTGTAACCAGAGGGTTTTAGGTAAAAGAATAATAATCGGGGCCGGGCGCGGTGGCTCAAGCCTGTAATCCCAGCACTTTGGGAGGCCTAGACAGGCGGTTCACAAGGTCAGGAGATAGCGAGACCATCCTGGCTAACACGGCGAAACCCCGTCTCTACTAAAAACACAAAAAATTAGCCGGGCGAGGTGGCGGCGCCTGTGGTCCCAGCTACTCGGGAGGCTGAGGCAGGAGAATGGCGGGAACCCGGGAGGCGGAGCTTGCAGTGAGCTGAGATCTGGCCACTGCACTCCAGCCTGGGCGACAGAGCGAGACTCCGTCTCAAAAAAAAAAA…	GAAACTAGTCCACACAGGACCCAGTGGGATATTGGGAGGTGTTAGATTTTATTCTATGTACGGCTGGGTGTAACCAGAGGGTTTTAGGTAAAAGAATAATAATCGGGGCCGGGCGCGGTGGCTCAAGCCTGTAATCCCAGCACTTTGGGAGGCCTAGACAGGCGGTTCACAAGGTCAGGAGATAGCGAGACCATCCTGGCTAACACGGCGAAACCCCGTCTCTACTAAAAACACAAAAAATTAGCCGGGCGAGGTGGCGGCGCCTGTGGTCCCAGCTACTCGGGAGGCTGAGGCAGGAGAATGGCGGGAACCCGGGAGGCGGAGCTTGCAGTGAGCTGAGATCTGGCCACTGCACTCCAGCCTGGGCGACAGAGCGAGACTCCGTCTCAAAAAAAAAAA…
0d8d89cc-f94d-4468-8a07-f485b496adbe	Chr1	68713134	68713148	ALU	Alu_YRa4	0	270	-	-	N	CCTAACTAAAATTTT	Hippocampus.Single.WGS.ON22212.Neuron-#10|9,Hippocampus.Single.WGS.ON22212.Neuron-#19|29,Liver.Bulk.WGS.ON22212|16,Hippocampus.Single.RC-seq.ON22212.Neuron-#10|1,Hippocampus.Single.RC-seq.ON22212.Neuron-#19|3	Hippocampus.Single.WGS.ON22212.Neuron-#10|13,Hippocampus.Single.WGS.ON22212.Neuron-#19|23,Liver.Bulk.WGS.ON22212|18,Hippocampus.Single.RC-seq.ON22212.Neuron-#10|1,Hippocampus.Single.RC-seq.ON22212.Neuron-#19|4	GGGTGACAGAGTGAGATTCTGTCTTTAAAAAAAAAAAATTAAAAAATGTTGTTTTGAATTATGTATGTATTGTGCAATGGCTAAATCAAGCTAATTGACATAGTAATTACCTCCCATACTTATTTTCTGTGGTGAGAACACTTAAAATCTACTCTCCTAACAATTTTCAAGACTGTGATACATTGTTATTTACTATAGTCACCATGCTATGCAATAGATCTCTTGAACTTATTTCTCCTAACTAAAATTTTTTTTTATTTTTTTATTTATTTATTTATTTATTTATTTTTTTTTTGAGACGGAGTCTCGCGCTGTCACCCAGGCTGGAGTGCAGTGGCCGGATCTCGGCTCACTGCAAGCTCCGCCTCCCGGGTTTACGCCATTCTCCTGCCTCAGCCT…	GGGTGACAGAGTGAGATTCTGTCTTTAAAAAAAAAAAATTAAAAAATGTTGTTTTGAATTATGTATGTATTGTGCAATGGCTAAATCAAGCTAATTGACATAGTAATTACCTCCCATACTTATTTTCTGTGGTGAGAACACTTAAAATCTACTCTCCTAACAATTTTCAAGACTGTGATACATTGTTATTTACTATAGTCACCATGCTATGCAATAGATCTCTTGAACTTATTTCTCCTAACTAAAATTTTTTTTTATTTTTTTATTTATTTATTTATTTATTTATTTTTTTTTTGAGACGGAGTCTCGCGCTGTCACCCAGGCTGGAGTGCAGTGGCCGGATCTCGGCTCACTGCAAGCTCCGCCTCCCGGGTTTACGCCATTCTCCTGCCTCAGCCT…	GGAACTGAGTGTTTCAGTAACACTGGTCAAAGGATACAAAATTTTAGTTAGGGCCGGGCGCGGTGGCTCAAGCCTGTAATCCCAGCACTTTGGGAGGCCGAGACGGGCGGACACGAGGTCGGGAGATCGAGACCATCCTGGTTAACACGGTGAAACCCCGTCTCTACTAAAAAATACAAAAAACTAGCCAGGCGAGGTGGCGGGCGCCTGTAGTCCCAGCTACTCGGGAGGCTGAGGCAGGAGAATGGCGTAAACCCGGGAGGCGGAGCTTGCAGTGAGCCGGATCCGGCCACTGCACTCCAGCCTGGGTGACAGCGCGAGACTCCGTCTCAAAAAAAAAATAAATAAATAAATAAATAAATAAAAAAATAAAAAAAAATTTTAGTTAGGAGAAATAAG…	GGAACTGAGTGTTTCAGTAACACTGGTCAAAGGATACAAAATTTTAGTTAGGGCCGGGCGCGGTGGCTCAAGCCTGTAATCCCAGCACTTTGGGAGGCCGAGACGGGCGGACACGAGGTCGGGAGATCGAGACCATCCTGGTTAACACGGTGAAACCCCGTCTCTACTAAAAAATACAAAAAACTAGCCAGGCGAGGTGGCGGGCGCCTGTAGTCCCAGCTACTCGGGAGGCTGAGGCAGGAGAATGGCGTAAACCCGGGAGGCGGAGCTTGCAGTGAGCCGGATCCGGCCACTGCACTCCAGCCTGGGTGACAGCGCGAGACTCCGTCTCAAAAAAAAAATAAATAAATAAATAAATAAATAAAAAAATAAAAAAAAATTTTAGTTAGGAGAAATAAG…
beb3c248-8a03-48ae-859c-2fa90b083ac9	Chr1	68904717	68904704	ALU	Alu_YRb4	0	258	-	-	N	TGTATGTCTTTTCT	Hippocampus.Single.WGS.ON22212.Neuron-#19|7,Liver.Bulk.WGS.ON22212|10,Hippocampus.Single.RC-seq.ON22212.Neuron-#19|5,Hippocampus.Single.RC-seq.ON22212.Neuron-#21|2	Hippocampus.Single.WGS.ON22212.Neuron-#19|6,Hippocampus.Single.WGS.ON22212.Neuron-#21|8,Liver.Bulk.WGS.ON22212|14,Hippocampus.Single.RC-seq.ON22212.Neuron-#19|8,Hippocampus.Single.RC-seq.ON22212.Neuron-#21|2	TTTGGCCACTACATTGCTCATAACATACACTTATTTTCTTTTAAATCCTTGCTGGATACATAATTTTGTCCTCCTTTTTGTTCCTAATATTTGTTTTTTGCCTTCTTTCTTTCTTCTTAATCATGCCAGAGATTGTATGTCTTTTCTTTTTTTTTTTTTTTTTTTTTTTTTTTTTTTTTTTTTTTTTTTTTTTTTTTTTTTGATTTTTCGCCAAGGTGGGGTGCGGTGGTGCCT	GAGGTTGCAGTCAGCTGAAATCGCATCACTGCACTCCAGCCTGGGCGACAGAGCAAGACTCTGTATAGAAAAAAAGAAAAAATGCCCCCAGAAATCCGACCGTAGAACAGGTGCTACAATAAACATCAACTAAACATCGTCTGTTTTTAAAAACCCAAAGAACAGAAGAAAGGAAAGAAAATAAAGATAAGAGCAGAAATTTGAGGAAATAGCAGAAGAGACAATGGACAAAATCAATGAAGCCAAAAAATGGTTCTTAAAAAGACCTAGAAAAGACATACAGGCCGGGCGCGGTGGCTCACGCCTGTAATCCCAGCACTTTGGGAGGCCGAGGCGGGCGGATCACAAGGTCAGGAGATCGAGACCACGGTGAAACCCCGTCTCTACTAAAAAATACAA…	GAGCAGAAATTTGAGGAAATAGCAGAAGAGACAATGGACAAAATCAATGAAGCCAAAAAATGGTTCTTAAAAAGACCTAGAAAAGACATACAGGCCGGGCGCGGTGGCTCACGCCTGTAATCCCAGCACTTTGGGAGGCCGAGGCGGGCGGATCACAAGGTCAGGAGATCGAGACCACGGTGAAACCCCGTCTCTACTAAAAAATACAAAAAATTAGCCGGGCGCGGTTGTGGGCGCCTGTAGTCCCAGCTACTCGGGAGGCTGAGGCAGGAGAATGGCGTGAACCCGGGAGGCGGAGCTTGCAGTGAGCCGAGATCGCGCCACTGCACTCCAGCCTGGGCGACAGAGCGAGACTCCGTCTCAAAAAAAAAAAAAAAAAAAAAAAAAAAAAAAAAAAAA…	GAGCAGAAATTTGAGGAAATAGCAGAAGAGACAATGGACAAAATCAATGAAGCCAAAAAATGGTTCTTAAAAAGACCTAGAAAAGACATACAGGCCGGGCGCGGTGGCTCACGCCTGTAATCCCAGCACTTTGGGAGGCCGAGGCGGGCGGATCACAAGGTCAGGAGATCGAGACCACGGTGAAACCCCGTCTCTACTAAAAAATACAAAAAATTAGCCGGGCGCGGTTGTGGGCGCCTGTAGTCCCAGCTACTCGGGAGGCTGAGGCAGGAGAATGGCGTGAACCCGGGAGGCGGAGCTTGCAGTGAGCCGAGATCGCGCCACTGCACTCCAGCCTGGGCGACAGAGCGAGACTCCGTCTCAAAAAAAAAAAAAAAAAAAAAAAAAAAAAAAAAAAAA…
8705d3b4-6ab3-45d9-b2fc-1aa2551d4a76	Chr1	70360156	70360142	ALU	Alu_YRa4	0	270	+	+	N	AAAAGACAATTTGCT	Hippocampus.Single.WGS.ON22212.Neuron-#16|5,Hippocampus.Single.WGS.ON22212.Neuron-#19|7,Hippocampus.Single.WGS.ON22212.Neuron-#21|3,Hippocampus.Single.WGS.ON22212.Neuron-#37|1,Hippocampus.Single.WGS.ON22212.Neuron-#7|1,Hippocampus.Single.WGS.ON22213.Neuron-#49|2,Liver.Bulk.WGS.ON22212|18,Liver.Bulk.WGS.ON22213|8,Hippocampus.Single.RC-seq.ON22212.Neuron-#16|2,Hippocampus.Single.RC-seq.ON22212.Neur…	Hippocampus.Single.WGS.ON22212.Neuron-#10|6,Hippocampus.Single.WGS.ON22212.Neuron-#21|5,Hippocampus.Single.WGS.ON22212.Neuron-#7|2,Hippocampus.Single.WGS.ON22213.Neuron-#31|1,Hippocampus.Single.WGS.ON22213.Neuron-#39|2,Liver.Bulk.WGS.ON22212|8,Liver.Bulk.WGS.ON22213|15,Hippocampus.Single.RC-seq.ON22212.Neuron-#10|3,Hippocampus.Single.RC-seq.ON22212.Neuron-#16|2,Hippocampus.Single.RC-seq.ON22212.N…	GTGCTTAGTTTATTTTCATTGACTATGAAAAGGTGTGGGAATGTGAAGAGTCTGAATTAGTTAATCCATTTATTTGATCAACTTCTCATGCAAATTGTTTTCAGGGAGAAGAAGTCAATGCTGGAAGGATTGGGCTAACACTAGTAGTAGCTGGAATGGTGGGCTCTATTCTTTGTGGCTTATGGCTGGATTATACCAAAACATACAAGTAAGTGAAAGTAAATACATGTATGGTGTGTAACCAAAGGTATTTTGATTTTAAAAGACAATTTGCTGGCCGGGCGCGGTGGCTCAAGCCTGTAATCCCAGCACTTTGGGAGGCCGAGACGGGCGGATCACGAGGTCAGGAGATCGAGACCATCTTGGCTAACACAATGAAACCCCGTCTCCACTAAAAAT…	ACAATTTGCAGGAGAATGGCGGGAACCCGGGAGGCGGAGCTTGCAGTGAGCCGAGAGGGCGCCACTGCACTCCAGCCTGGGCGACAGAGCGAGACTCCGCCTCAAAAAAAAAAAAAAAAAAAAGACAATTTGCTTTTTATTTTAAGAAATTTAAAACATGTTATTACTTAGATATGGATTCTAAACACTAGTAGGTGTCTCTTCACTTAAGTGTTTCAATCCTCTATGTATTGTATTATTTTATTGGTCACATTTTATTTCAATTTTG	TAACCAAAGGTATTTTGATTTTAAAAGACAATTTGCTGGCCGGGCGCGGTGGCTCAAGCCTGTAATCCCAGCACTTTGGGAGGCCGAGACGGGCGGATCACGAGGTCAGGAGATCGAGACCATCTTGGCTAACACAATGAAACCCTGTCTCCACTAAAAAAGTACAAAAAAAATTAGCCGGGCGTGGTGGCGGGCGCCTGTAGTCCCAGCTACTCGGGAGGCTGAGGCAGGAGAATGGCGGGAACCCGGGAGGCGGAGCTTGCAGTGAGCCGAGATGGCGCCACTGCACTCCAGCCTGGGCGACAGAGCGAGACTCCGCCTCAAAAAAAAAAAAAAAAGACAATTTGCTTTTTATTTTAAGAAATTTAAAACATGTTATTACTTAGATATGGATTCTAA…	TAACCAAAGGTATTTTGATTTTAAAAGACAATTTGCTGGCCGGGCGCGGTGGCTCAAGCCTGTAATCCCAGCACTTTGGGAGGCCGAGACGGGCGGATCACGAGGTCAGGAGATCGAGACCATCTTGGCTAACACAATGAAACCCTGTCTCCACTAAAAAAGTACAAAAAAAATTAGCCGGGCGTGGTGGCGGGCGCCTGTAGTCCCAGCTACTCGGGAGGCTGAGGCAGGAGAATGGCGGGAACCCGGGAGGCGGAGCTTGCAGTGAGCCGAGATGGCGCCACTGCACTCCAGCCTGGGCGACAGAGCGAGACTCCGCCTCAAAAAAAAAAAAAAAAGACAATTTGCTTTTTATTTTAAGAAATTTAAAACATGTTATTACTTAGATATGGATTCTAA…
2250f544-c3b6-48a7-b82e-e293f5ca29fc	Chr1	70471485	70471471	ALU	Alu_YRc2	0	270	-	-	N	CTTATAGACAGTTTT	Hippocampus.Single.WGS.ON22212.Neuron-#17|7,Hippocampus.Single.WGS.ON22212.Neuron-#19|12,Hippocampus.Single.WGS.ON22212.Neuron-#21|52,Liver.Bulk.WGS.ON22212|20,Hippocampus.Single.RC-seq.ON22212.Neuron-#17|1,Hippocampus.Single.RC-seq.ON22212.Neuron-#19|4,Hippocampus.Single.RC-seq.ON22212.Neuron-#21|15	Hippocampus.Single.WGS.ON22212.Neuron-#17|7,Hippocampus.Single.WGS.ON22212.Neuron-#19|16,Hippocampus.Single.WGS.ON22212.Neuron-#21|59,Liver.Bulk.WGS.ON22212|19,Hippocampus.Single.RC-seq.ON22212.Neuron-#17|3,Hippocampus.Single.RC-seq.ON22212.Neuron-#19|7,Hippocampus.Single.RC-seq.ON22212.Neuron-#21|13	GCTCCAAATATTCCTATTTCTTTAATGAAGAATCCCAGCATCTTTACCCCTCTGACAATCTTTTCCTACAGTTCAAGAGATAAATTTAAATGATCATCTTTTCAACTGGCATATTCATTTTTGGATCAATTCTCTTATAGACAGTTTTTTTTTTTTTTTTGAGATTTCG	TCAGTTTCTTTGTCTGTAGTTCGGGTTGTTGTGAGGATTAGATGAGACAAAGCATATAAAGCACAATGTTTGAAACATAGTTAAGTGCCTAGGTAGTATTAGGAAGGGAAACAGCTTGTTTGTGGACCTGGACCAGCTCAAGTACTCTTTGAAATTCACATACTTAAACAAAGGTCAAGATCACAGAAACATATCTCTCAGATATCAAGAGGACCTTTAGTTGTCTTTGATTTACTAAATCTCAAAACTGTCTATAAGCCGGGCGCGGTGGCTCAAGCCTGTAATCCCAGCACTTTGGGAGGCCGAGACGGGCGGATCACTAGGTCAGGAGATCGAGACCATCCTGGCGAACACGGTGAAACCCCGTCTCTACTAAAAAATACAAAAAACTAGCCGGGC…	AAGAGGACCTTTAGTTGTCTTTGATTTACTAAATCTCAAAACTGTCTATAAGCCGGGCGCGGTGGCTCAAGCCTGTAATCCCAGCACTTTGGGAGGCCGAGACGGGCGGATCACTAGGTCAGGAGATCGAGACCATCCTGGCGAACACGGTGAAACCCCGTCTCTACTAAAAAATACAAAAAACTAGCCGGGCGAGGCGGCGGGCGCCTGTAGTCCCAGCTACTCGGGAGGCTGAGGCAGGAGAATGGCGTAAACCCGGGGGGCGGAGCTTGCAGTGAGCTGAGATCCGGCCACTGCACTCCAGCCCGGGCGACAGAGCCAGACTCCGTCTCAAAAAAAAAAAAAAAACACTGTGTCTATAAGAGAATTGATCCAAAAATGAATATGCCAGTTGAAAAG…	AAGAGGACCTTTAGTTGTCTTTGATTTACTAAATCTCAAAACTGTCTATAAGCCGGGCGCGGTGGCTCAAGCCTGTAATCCCAGCACTTTGGGAGGCCGAGACGGGCGGATCACTAGGTCAGGAGATCGAGACCATCCTGGCGAACACGGTGAAACCCCGTCTCTACTAAAAAATACAAAAAACTAGCCGGGCGAGGCGGCGGGCGCCTGTAGTCCCAGCTACTCGGGAGGCTGAGGCAGGAGAATGGCGTAAACCCGGGGGGCGGAGCTTGCAGTGAGCTGAGATCCGGCCACTGCACTCCAGCCCGGGCGACAGAGCCAGACTCCGTCTCAAAAAAAAAAAAAAAACACTGTGTCTATAAGAGAATTGATCCAAAAATGAATATGCCAGTTGAAAAG…
7429449d-dad9-4d9f-b08c-865ce80693d1	Chr1	72005006	72005021	ALU	Alu_YRb4	0	258	+	+	N	AGAAATACAAGCATCC	Hippocampus.Single.WGS.ON22213.Neuron-#10|1,Hippocampus.Single.WGS.ON22213.Neuron-#15|1,Hippocampus.Single.WGS.ON22213.Neuron-#71|1,Hippocampus.Single.WGS.ON22213.Neuron-#39|1,Hippocampus.Single.WGS.ON22213.Neuron-#47|16,Hippocampus.Single.WGS.ON22213.Neuron-#49|1,Liver.Bulk.WGS.ON22213|8,Hippocampus.Single.RC-seq.ON22213.Neuron-#15|1,Hippocampus.Single.RC-seq.ON22213.Neuron-#47|7	Hippocampus.Single.WGS.ON22213.Neuron-#15|1,Hippocampus.Single.WGS.ON22213.Neuron-#69|1,Hippocampus.Single.WGS.ON22213.Neuron-#39|1,Hippocampus.Single.WGS.ON22213.Neuron-#47|11,Hippocampus.Single.WGS.ON22213.Neuron-#49|2,Liver.Bulk.WGS.ON22213|9,Hippocampus.Single.RC-seq.ON22213.Neuron-#15|1,Hippocampus.Single.RC-seq.ON22213.Neuron-#39|2,Hippocampus.Single.RC-seq.ON22213.Neuron-#47|2	AGGAGAATGGCGGGAACCCGGGAGGCGGAGCTTGCAGTGAGCCGAGATCGCGCCACTGCCCTCCAGCCTGGGCTGGGCGACAGAGCGAGACTCCGTCTCAAAAAAAAAAAAAAAAAAAAAAGAAATACAAGCATCCTTACATAAAATACTGGCCCCTGATTACAGTAAGAATTATAGAGGGAAAAAGATCTTTTTCTCTGCCCTTCTAATCTCTCAGTGGCTTTCCCTCCTCAAACTTCTCTACTGCCTGGTCCCCTACCTCTCAATT	ACATTGTTCCTTTCTTCTAACATTCCCTTGCACTTTGAGGTTGATATGAAGATCAATAATTTAATGTTTGTCAAATACTCTAGGTTTCTCAGATGAAAGACAACATTAAAGTTCAAATAACCAGTGGCTAGCATTACACAAGAAGTATTGCAGTTTACTCTTTATATTTGGGCTTCACTAGGCTGCAAAGATATATCAGCTAGCTTTTGTACTCTTGTTAAAGGCAAGAGTTACCCTAACATTCTTTAACTAGATTTCAACATTAGAAATACAAGCATCCCAGGCCGGGCGCGGTGGCTCACGCCTGTAATCCCAGTACTTTGGGAGGCCGAGGCGGGCGGATCACAAGGTCAGGAGATCGAGACCACGGTGAAACCCCGTCTCTACTAAAAATACAAA…	CTTCACTAGGCTGCAAAGATATATCAGCTAGCTTTTGTACTCTTGTTAAAGGCAAGAGTTACCCTAACATTCTTTAACTAGATTTCAACATTAGAAATACAAGCATCCCAGGCCGGGCGCGGTGGCTCACGCCTGTAATCCCAGTACTTTGGGAGGCCGAGGCGGGCGGATCACAAGGTCAGGAGATCGAGACCACGGTGAAACCCCGTCTCTACTAAAAATACAAAAAATTAGCCGGGCGCGGTTGTGGGCGCCTGTAGTCCCAGCTACTCGGGAGGCTGAGGCAGGAGAATGGCGTGAACCCGGGAGGCGGAGCTTGCAGTGAGCCGAGATCGCGCCACTGCACTCCAGCCTGGGCCACAGAGCGAGAGTCCGTCTCAAAAAAAAAAAAAAAAAACA…	CTTCACTAGGCTGCAAAGATATATCAGCTAGCTTTTGTACTCTTGTTAAAGGCAAGAGTTACCCTAACATTCTTTAACTAGATTTCAACATTAGAAATACAAGCATCCCAGGCCGGGCGCGGTGGCTCACGCCTGTAATCCCAGTACTTTGGGAGGCCGAGGCGGGCGGATCACAAGGTCAGGAGATCGAGACCACGGTGAAACCCCGTCTCTACTAAAAATACAAAAAATTAGCCGGGCGCGGTTGTGGGCGCCTGTAGTCCCAGCTACTCGGGAGGCTGAGGCAGGAGAATGGCGTGAACCCGGGAGGCGGAGCTTGCAGTGAGCCGAGATCGCGCCACTGCACTCCAGCCTGGGCCACAGAGCGAGAGTCCGTCTCAAAAAAAAAAAAAAAAAACA…
3afb40fd-1fc6-41ae-ba32-c73122510e59	Chr1	72575193	72575206	ALU	Alu_YRb4	0	258	+	+	N	AAGATAGTTGGTGT	Hippocampus.Single.WGS.ON22212.Neuron-#16|6,Hippocampus.Single.WGS.ON22212.Neuron-#17|1,Hippocampus.Single.WGS.ON22212.Neuron-#19|6,Hippocampus.Single.WGS.ON22212.Neuron-#21|1,Hippocampus.Single.WGS.ON22212.Neuron-#7|1,Hippocampus.Single.WGS.ON22213.Neuron-#15|1,Hippocampus.Single.WGS.ON22213.Neuron-#38|4,Hippocampus.Single.WGS.ON22213.Neuron-#47|1,Liver.Bulk.WGS.ON22212|15,Liver.Bulk.WGS.ON22213…	Hippocampus.Single.WGS.ON22212.Neuron-#17|1,Hippocampus.Single.WGS.ON22212.Neuron-#19|8,Hippocampus.Single.WGS.ON22212.Neuron-#21|1,Hippocampus.Single.WGS.ON22212.Neuron-#7|1,Hippocampus.Single.WGS.ON22213.Neuron-#15|2,Hippocampus.Single.WGS.ON22213.Neuron-#31|2,Hippocampus.Single.WGS.ON22213.Neuron-#38|6,Hippocampus.Single.WGS.ON22213.Neuron-#39|1,Hippocampus.Single.WGS.ON22213.Neuron-#49|24,Liv…	GGCGAATGGCGGTAACCCGGGTGGCGGCGCTTGCCTGCTCCCGCTACCGCCCCACCGACAACCACCCTGGGGGCCACGGCGCAAACCCGTCAAAAAAAAAAAAAAAAAAAAAAAAAAAAAAAAAGATAGTTGGTGTGATCATCTACACATATAAAGCAAGAAATAGTTAAAATTCATGTTCGTTCATTTATCCATTTTATGTTTCTGTTTTTTGAAAGGCATCGTTTCCTATGCATGGGATATAATAAACATTTAACTAAACTGAGAGTTTT	TTTTTTTTTTTTTTTTTTTTTTTTTTTTGAGACGGAGTCTCGCTCTGTCGCCCAGGCTGGAGTGCAGTGGCGCGATCTCGGCTCACTGCAAGCTCCGCCTCCCGGGTTCACGCCATTCTCCTGCCTCAGCCTCCCGAGTAGCTGGGACTACAGGCGCCCACAACCGCGCCCGGCTAATTTTTTGTATTTTTAGTAGAGACGGGGTTTCACCGTGGTCTCGATCTCCTGACCTTGTGATCCGCCCGCCTCGGCCTCCCAAAGTGCTGGGATTACACCAACTATCTTAACTCAGGCCTCTATAACAGCTAATATGCTATCCGAGTAAAATAGATAAATGTAAAAATGTTTCTAAGTAGGAATTCAGAAAGAGAATTCAAAATAATCAGTATGTGTCCAAGT…	ATACTGATTATTTTGAATTCTCTTTCTGAATTCCTACTTAGAAACATTTTTACATTTATCTATTTTACTCGGATAGCATATTAGCTGTTATAGAGGCCTGAGTTAAGATAGTTGGTGTAATCCCAGCACTTTGGGAGGCCGAGGCGGGCGGATCACAAGGTCAGGAGATCGAGACCACGGTGAAACCCCGTCTCTACTAAAAATACAAAAAATTAGCCGGGCGCGGCGTTTGTGGGCGCCTGTAGTCCCAGCTACTCGGGAGGCTGAGGCAGGAGACATGGCGTGAACCCGGGAGGCGGAGCTTGCAGTGAGCCGAGATCGCGCCACTGCACTCCAGCCTGGGCGACAGAGCGAGACTCCGTCTCAAAAAAAAAAAAAAAAAAAAAAAAAAAAAAAAAG…	ATACTGATTATTTTGAATTCTCTTTCTGAATTCCTACTTAGAAACATTTTTACATTTATCTATTTTACTCGGATAGCATATTAGCTGTTATAGAGGCCTGAGTTAAGATAGTTGGTGTAATCCCAGCACTTTGGGAGGCCGAGGCGGGCGGATCACAAGGTCAGGAGATCGAGACCACGGTGAAACCCCGTCTCTACTAAAAATACAAAAAATTAGCCGGGCGCGGCGTTTGTGGGCGCCTGTAGTCCCAGCTACTCGGGAGGCTGAGGCAGGAGACATGGCGTGAACCCGGGAGGCGGAGCTTGCAGTGAGCCGAGATCGCGCCACTGCACTCCAGCCTGGGCGACAGAGCGAGACTCCGTCTCAAAAAAAAAAAAAAAAAAAAAAAAAAAAAAAAAG…
472b8916-1215-4362-a756-546a493b706e	Chr1	73877019	73877000	ALU	Alu_YRa4	0	269	-	-	N	CAAGACATTTATAGTTTTTT	Hippocampus.Single.WGS.ON22212.Neuron-#21|17,Hippocampus.Single.WGS.ON22212.Neuron-#7|1,Liver.Bulk.WGS.ON22212|16,Hippocampus.Single.RC-seq.ON22212.Neuron-#17|1,Hippocampus.Single.RC-seq.ON22212.Neuron-#21|6	Hippocampus.Single.WGS.ON22212.Neuron-#17|4,Hippocampus.Single.WGS.ON22212.Neuron-#21|13,Liver.Bulk.WGS.ON22212|20,Hippocampus.Single.RC-seq.ON22212.Neuron-#21|9	AATTTAAAATGATTAGGTTACTCCAAGCCTTCTTTTGATCCTGATAAATCCCTATTCTTTCAAATATTCTTTTCATAAAATGAATATTTAAATGTGTTAAATTTAAAACCACCATTTTCACTTTTCCTCAAGACATTTATAGTTTTTTTTTTTTTTTTTTTTTTTTTATTATGTGGGGTCTCTGTTTTTTTCCCAGTGCTGGAGTGCAGTGGCGCGATATCGGCGCACAGCAAGCTCC	GACATCCATTGAGTGCTTGCATGAAGTTTAGTTTTTGAACTGTACAAATAAATGATTTTCTATATATCTGTCTACATATTGAGGGCCTGATTGATGGCCCTTCTGACTTGGGGTCAGCAGTGAGTTCATATCTCTTGGAATACTTTGGCTTATTCCCTGGAAGTATTAACAGAAATCCTGTGTTCACTGTTTTCATTATTTTCCTTCAGGCATAATCTGACCTAATGATATGTAACTGTATTACTGTGATTTAAGAGATTTTTTAAAAAACTATAAATGTCTTGGCCGGGCGCGGTGGCTCAAGCCTGTAATCCCAGCACTTTGGGAGGCCGAGACGGGCGGATCACGAGGTCAGGAGATCGAGACCATCCTGGCTAACACAATGAAACCCCGTCTCCA…	AGATTTTTTAAAAAACTATAAATGTCTTGGCCGGGCGCGGTGGCTCAAGCCTGTAATCCCAGCACTTTGGGAGGCCGAGACGGGCGGATCACGAGGTCAGGAGATCGAGACCATCCTGGCTAACACAATGAAACCCCGTCTCCACTAAAAATACAAAAAAATTAGCCGGGCGTGGTGGCGGCGCCTGTAGTCCCAGCTACTCGGGAGGCTGAGGCAGGAGAATGGCGGGAACCCGGGAGGCGGAGCTTGCAGTGAGCCGAGATCGCGCCACTGCACTCCAGCCTGGGAGACAGAGCGAGACTCCGCCTCAAAAAAAAAAAAAAAAAAAAAAAAAAAAACTATAAATGTCTTGAGGAAAAGTGAAAATGGGGGTTTTAAATTTAACACATTTAAATATTC…	AGATTTTTTAAAAAACTATAAATGTCTTGGCCGGGCGCGGTGGCTCAAGCCTGTAATCCCAGCACTTTGGGAGGCCGAGACGGGCGGATCACGAGGTCAGGAGATCGAGACCATCCTGGCTAACACAATGAAACCCCGTCTCCACTAAAAATACAAAAAAATTAGCCGGGCGTGGTGGCGGCGCCTGTAGTCCCAGCTACTCGGGAGGCTGAGGCAGGAGAATGGCGGGAACCCGGGAGGCGGAGCTTGCAGTGAGCCGAGATCGCGCCACTGCACTCCAGCCTGGGAGACAGAGCGAGACTCCGCCTCAAAAAAAAAAAAAAAAAAAAAAAAAAAAACTATAAATGTCTTGAGGAAAAGTGAAAATGGGGGTTTTAAATTTAACACATTTAAATATTC…
c46ba266-addd-482e-a2d5-efd887a78c1d	Chr1	75138823	75138835	ALU	Alu_YRa4	0	270	-	-	N	GAAAGTAACCTTT	Hippocampus.Single.WGS.ON22212.Neuron-#10|20,Hippocampus.Single.WGS.ON22212.Neuron-#21|44,Hippocampus.Single.WGS.ON22212.Neuron-#37|14,Liver.Bulk.WGS.ON22212|12,Hippocampus.Single.RC-seq.ON22212.Neuron-#10|3,Hippocampus.Single.RC-seq.ON22212.Neuron-#21|18,Hippocampus.Single.RC-seq.ON22212.Neuron-#37|1	Hippocampus.Single.WGS.ON22212.Neuron-#10|15,Hippocampus.Single.WGS.ON22212.Neuron-#16|1,Hippocampus.Single.WGS.ON22212.Neuron-#21|41,Hippocampus.Single.WGS.ON22212.Neuron-#37|11,Hippocampus.Single.WGS.ON22213.Neuron-#15|3,Hippocampus.Single.WGS.ON22213.Neuron-#69|3,Hippocampus.Single.WGS.ON22213.Neuron-#52|7,Liver.Bulk.WGS.ON22212|12,Liver.Bulk.WGS.ON22213|6,Hippocampus.Single.RC-seq.ON22212.Neu…	GGCAGATGGCTTGAGCCCAGGAGTTCAAGACCAGCCTAGCCAACATGGTGAAAACTCATCTTCACTAAAAATGCTAAAAAGAAAAAAAAAAATTAGCTGGGTGTGGTGGCAGGTGCCTGTAATCCCCCCTACTCAGGAATCTGAAGCAGGAGAATCTCTTGAACCTGGGAGGCAGAGGTGCAGTGAGCTGAGATCACGCAACTGCACTCCAGCCTGGGCAACAGAGCGAGACTCTGTCTAAAAATGATGATAATAATAATAAGTCAAAGGTTACTTTCGGCCGGGCGCGGTGGCTCACGCCTGTAATCCCAGCACTTTGGGAGGCCGAGGCGGGCGGATCACAAGGTCAGGAGATCGAGACCACGGTGAAATCCCGTCTCTACTAAAAATACAAAAAAT…	GGCAGATGGCTTGAGCCCAGGAGTTCAAGACCAGCCTAGCCAACATGGTGAAAACTCATCTTCACTAAAAATGCTAAAAAGAAAAAAAAAAATTAGCTGGGTGTGGTGGCAGGTGCCTGTAATCCCCCCTACTCAGGAATCTGAAGCAGGAGAATCTCTTGAACCTGGGAGGCAGAGGTGCAGTGAGCTGAGATCACGCAACTGCACTCCAGCCTGGGCAACAGAGCGAGACTCTGTCTAAAAATGATGATAATAATAATAAGTCAAAGGTTACTTTCGGCCGGGCGCGGTGGCTCACGCCTGTAATCCCAGCACTTTGGGAGGCCGAGGCGGGCGGATCACAAGGTCAGGAGATCGAGACCACGGTGAAATCCCGTCTCTACTAAAAATACAAAAAAT…	ATAATAATAATAAGTCAAAGGTTACTTTCGGCCGGGCGCGGTGGCTCACGCCTGTAATCCCAGCACTTTGGGAGGCCGAGGCGGGCGGATCACAAGGTCAGGAGATCGAGACCACGGTGAAATCCCGTCTCTACTAAAAATACAAAAAATTAGCCGGGCGTGGTGGCGGGCGCCTGTAGTCCCAGCTACTCAGGAGGCTGAGGCAGGAGAATGGCGTAAACCCAGGAGGCGGAGCTTGCAGTGAGCCGAGATCGCGCCACCGAAAGCCCAGCCTGGGCGCCAGAGCGAGACTCCGTCTCAAAAAACAATCAAACAAACAAACAAACAAAAAGGTGACTTTATTATTTATAGTTTTTATAGACAGAAGTCACATCATGTCACTCCTCTGCTGAAAACACC…	ATAATAATAATAAGTCAAAGGTTACTTTCGGCCGGGCGCGGTGGCTCACGCCTGTAATCCCAGCACTTTGGGAGGCCGAGGCGGGCGGATCACAAGGTCAGGAGATCGAGACCACGGTGAAATCCCGTCTCTACTAAAAATACAAAAAATTAGCCGGGCGTGGTGGCGGGCGCCTGTAGTCCCAGCTACTCAGGAGGCTGAGGCAGGAGAATGGCGTAAACCCAGGAGGCGGAGCTTGCAGTGAGCCGAGATCGCGCCACCGAAAGCCCAGCCTGGGCGCCAGAGCGAGACTCCGTCTCAAAAAACAATCAAACAAACAAACAAACAAAAAGGTGACTTTATTATTTATAGTTTTTATAGACAGAAGTCACATCATGTCACTCCTCTGCTGAAAACACC…
6e690055-9643-4d09-b4d2-00ad965e6d45	Chr1	75693536	75693550	ALU	Alu_YRb4	0	258	+	+	N	TAAAAGTAGAAGACA	Hippocampus.Single.WGS.ON22212.Neuron-#19|3,Liver.Bulk.WGS.ON22212|18	Hippocampus.Single.WGS.ON22212.Neuron-#19|7,Liver.Bulk.WGS.ON22212|11	ATAACAGTTAATAATACAATCAGATTTTACTATTTTTTCGTTATAGAAATGCAAAATTACAGCTTATTTAAAAACTTTTCACTCATTTTATTACTGACAAAGTTTTCTTTTACCATATGTTAATTGGTAGTTTTTAGTTTTTCAAAATTGCTTGTTCATGTCCTTTGCATGTTAATGATTTTCTTATTAATTTAAAATTAGGTTTGCTATACTAAGGGCTGAACTCCATATTTTTGTAAAGTCATATTGTCTTCTACTTTTATTTATTTATTTATTTATTTATTTATTTTTATTTTTATTTTTTTTGAGACGGAGTCTTGCTGTGTCGCCCAGGCTGGAGTGCAGTGGCCGGATCTCAGCTCATTGCAAGCTCTGCCTCCCGGGTTTTTACGCCATTCT…	ATAACAGTTAATAATACAATCAGATTTTACTATTTTTTCGTTATAGAAATGCAAAATTACAGCTTATTTAAAAACTTTTCACTCATTTTATTACTGACAAAGTTTTCTTTTACCATATGTTAATTGGTAGTTTTTAGTTTTTCAAAATTGCTTGTTCATGTCCTTTGCATGTTAATGATTTTCTTATTAATTTAAAATTAGGTTTGCTATACTAAGGGCTGAACTCCATATTTTTGTAAAGTCATATTGTCTTCTACTTTTATTTATTTATTTATTTATTTATTTATTTTTATTTTTATTTTTTTTGAGACGGAGTCTTGCTGTGTCGCCCAGGCTGGAGTGCAGTGGCCGGATCTCAGCTCATTGCAAGCTCTGCCTCCCGGGTTTTTACGCCATTCT…	CTCAGCATATATAAGTAAAAGAGCAATAAAGAATAATGAAGAGCATAACATTCAACTAAAAAATTTAAATGCTGTACCAAAAATACTCATAAACTTTAAAAGTAGAAGACAGGCCGGGCGCGGTGGCTCAAGCCTGTAATCCCAGCACTTTGGGAGGCCGAGACGGGTGGATCACGACGTCAGGAGTTCGAGACCATCCTGGCTAACACGGTGAAACCCCGTCTCTACTAAAAAATACAAAAAACTAGCCGGGCGAGGTGGTGGGCGCCTGTAGTCCCAGCTACTTGGGAGGCTGAGGCAGGAGAATGGCGTAAAAACCCGGGAGGCAGAGCTTGCAATGAGCTGAGATCCGGCCACTGCACTCCAGCCTGGGCGACACAGCAAGACTCCGTCTCAAAA…	CTCAGCATATATAAGTAAAAGAGCAATAAAGAATAATGAAGAGCATAACATTCAACTAAAAAATTTAAATGCTGTACCAAAAATACTCATAAACTTTAAAAGTAGAAGACAGGCCGGGCGCGGTGGCTCAAGCCTGTAATCCCAGCACTTTGGGAGGCCGAGACGGGTGGATCACGACGTCAGGAGTTCGAGACCATCCTGGCTAACACGGTGAAACCCCGTCTCTACTAAAAAATACAAAAAACTAGCCGGGCGAGGTGGTGGGCGCCTGTAGTCCCAGCTACTTGGGAGGCTGAGGCAGGAGAATGGCGTAAAAACCCGGGAGGCAGAGCTTGCAATGAGCTGAGATCCGGCCACTGCACTCCAGCCTGGGCGACACAGCAAGACTCCGTCTCAAAA…
6a00d094-b717-4321-aaf4-3cf196f07e41	Chr1	76433084	76433095	ALU	Alu_YRa4	0	270	-	-	N	AGGAAATTTTCT	Hippocampus.Single.WGS.ON22213.Neuron-#25|11,Hippocampus.Single.WGS.ON22213.Neuron-#49|8,Liver.Bulk.WGS.ON22213|10,Hippocampus.Single.RC-seq.ON22213.Neuron-#25|2	Hippocampus.Single.WGS.ON22213.Neuron-#25|23,Hippocampus.Single.WGS.ON22213.Neuron-#49|2,Liver.Bulk.WGS.ON22213|11,Hippocampus.Single.RC-seq.ON22213.Neuron-#25|8	AACCCATTGGATGAAGTAAGTTCCACTTTATCCAACAGTATTAGTTGGATGGAACTATATTTGTTTCAGGTTCTACTATCAAGACCCTTGTTAGTTTTGAGCATTAATAAACATTTTTTGAAAATCATTACCACCCCAAAAATATGGGTGATTATTTTCTTCTCCTTTAATTTTTCTTTCTTTTCTAAATTTCTATAAAGACTAAAAAAACCCATCTTAATGTATGTAACCCAGAAACTTCTGAGAGGCTTTTCTGCATATAGAAAATTTCCTGCCGGGCGCGGTGGCTCAAGCCTGTAATCCCAGCACTTTGGGAGGCCGAGACGGGCGGATCACGAGGTCAGGAGATCGAGACCATCCTGGCTAACACGGTGAAACCCCGTCTCTACTAAAAATACA…	AACCCATTGGATGAAGTAAGTTCCACTTTATCCAACAGTATTAGTTGGATGGAACTATATTTGTTTCAGGTTCTACTATCAAGACCCTTGTTAGTTTTGAGCATTAATAAACATTTTTTGAAAATCATTACCACCCCAAAAATATGGGTGATTATTTTCTTCTCCTTTAATTTTTCTTTCTTTTCTAAATTTCTATAAAGACTAAAAAAACCCATCTTAATGTATGTAACCCAGAAACTTCTGAGAGGCTTTTCTGCATATAGAAAATTTCCTGCCGGGCGCGGTGGCTCAAGCCTGTAATCCCAGCACTTTGGGAGGCCGAGACGGGCGGATCACGAGGTCAGGAGATCGAGACCATCCTGGCTAACACGGTGAAACCCCGTCTCTACTAAAAATACA…	AAGAAGACATTTTAGGCCGGGCGCGGTGGCTCAAGCCTGTAATCCCAGCACTTTGGGAGGCCGAGACGGGCGGATCACGAGGTCAGGAGATCGAGATCATCCTGGCTAACACGGTGAAACCCCGTCTCTACTAAAAAATAGAAAAAACTAGCCGGGCGAGGTGGCGGGCGCCTGTAGTCCCAGCTACTCAGGAGGCTGAGGCGGGAGAATGGTGTAAACCTGGGAGGTGGAGCTTGCAGTGAGCTGAGATCCGGCAGGAAATTTTCTATATGCAGAAAAGCCTCTCAGAAGTT	AAGAAGACATTTTAGGCCGGGCGCGGTGGCTCAAGCCTGTAATCCCAGCACTTTGGGAGGCCGAGACGGGCGGATCACGAGGTCAGGAGATCGAGATCATCCTGGCTAACACGGTGAAACCCCGTCTCTACTAAAAAATAGAAAAAACTAGCCGGGCGAGGTGGCGGGCGCCTGTAGTCCCAGCTACTCAGGAGGCTGAGGCGGGAGAATGGTGTAAACCTGGGAGGTGGAGCTTGCAGTGAGCTGAGATCCGGCAGGAAATTTTCTATATGCAGAAAAGCCTCTCAGAAGTT
d861692c-0abd-4ad1-9793-24126da89eb9	Chr1	78125363	78125370	ALU	Alu_YRa4	0	270	-	-	N	AGGTTTTA	Hippocampus.Single.WGS.ON22212.Neuron-#17|6,Hippocampus.Single.WGS.ON22212.Neuron-#37|5,Hippocampus.Single.WGS.ON22213.Neuron-#15|3,Hippocampus.Single.WGS.ON22213.Neuron-#39|10,Liver.Bulk.WGS.ON22212|10,Liver.Bulk.WGS.ON22213|18,Hippocampus.Single.RC-seq.ON22212.Neuron-#17|1,Hippocampus.Single.RC-seq.ON22212.Neuron-#37|2,Hippocampus.Single.RC-seq.ON22213.Neuron-#15|2,Hippocampus.Single.RC-seq.ON2…	Hippocampus.Single.WGS.ON22212.Neuron-#17|3,Hippocampus.Single.WGS.ON22212.Neuron-#37|15,Hippocampus.Single.WGS.ON22213.Neuron-#15|4,Hippocampus.Single.WGS.ON22213.Neuron-#31|1,Hippocampus.Single.WGS.ON22213.Neuron-#39|13,Liver.Bulk.WGS.ON22212|16,Liver.Bulk.WGS.ON22213|15,Hippocampus.Single.RC-seq.ON22212.Neuron-#17|1,Hippocampus.Single.RC-seq.ON22212.Neuron-#37|1,Hippocampus.Single.RC-seq.ON222…	ATGCTATGTGATAAGTACTGTGACATGTGAAGGATGCACAGGATACTGAGAAAATCCAAGGGTAGTAGCAAAGGTATACTTTTTCCTCTTGCTTCTTCATGCCATTAACAATGATGCTCACAGGACAAACTACTGATGGCAACCTTAGTTACAATAGGTAATCATTATAACCACCGCCATGAATTTCAGTATGTCACAAGACTCAACATCAAGAGTCTTTTTTTTTATTAAAGACTTTTTAATCGAACTGAATTCAATTTTAAAACCTTGGCCGGGCGCGGTGGCTCAAGCCTGTAATCCCGGCACTTTGGGAGGCCGAGACGGGCGAATCACGAGGTCAGGAGATCGAGACCATCCTGGGTAACACAGTGAAACCCCGTCTCTACTAAAAATACAAAA…	ATGCTATGTGATAAGTACTGTGACATGTGAAGGATGCACAGGATACTGAGAAAATCCAAGGGTAGTAGCAAAGGTATACTTTTTCCTCTTGCTTCTTCATGCCATTAACAATGATGCTCACAGGACAAACTACTGATGGCAACCTTAGTTACAATAGGTAATCATTATAACCACCGCCATGAATTTCAGTATGTCACAAGACTCAACATCAAGAGTCTTTTTTTTTATTAAAGACTTTTTAATCGAACTGAATTCAATTTTAAAACCTTGGCCGGGCGCGGTGGCTCAAGCCTGTAATCCCGGCACTTTGGGAGGCCGAGACGGGCGAATCACGAGGTCAGGAGATCGAGACCATCCTGGGTAACACAGTGAAACCCCGTCTCTACTAAAAATACAAAA…	AACTGAATTCAATTTTAAAACCTTGGCCGGGCGCGGTGGCTCAAGCCTGTAATCCCGGCACTTTGGGAGGCCGAGACGGGCGAATCACGAGGTCAGGAGATCGAGACCATCCTGGGTAACACAGTGAAACCCCGTCTCTACTAAAAATACAAAAACTCAGCCGGGCGAGGTGGCAGGCGCCTGTAGTCCCAGCTACTCGGGAGGCTGAGGCAGGAGAATGGCGTGAACCCGGGAGGCGGAGCTTGCAGTGAGCTGAGATCCGGCCACTGCACTCCAGCCTGGGTGACACAGCGAGACTCCGTCTCAAAAAAAAATAAATAAATAAAAATAAAACACTCCCAAGAAGTAGTCAAAAGAGTTTTCTTCATACTGATCAAAATTTCATCACAGATAGCTAGG…	AACTGAATTCAATTTTAAAACCTTGGCCGGGCGCGGTGGCTCAAGCCTGTAATCCCGGCACTTTGGGAGGCCGAGACGGGCGAATCACGAGGTCAGGAGATCGAGACCATCCTGGGTAACACAGTGAAACCCCGTCTCTACTAAAAATACAAAAACTCAGCCGGGCGAGGTGGCAGGCGCCTGTAGTCCCAGCTACTCGGGAGGCTGAGGCAGGAGAATGGCGTGAACCCGGGAGGCGGAGCTTGCAGTGAGCTGAGATCCGGCCACTGCACTCCAGCCTGGGTGACACAGCGAGACTCCGTCTCAAAAAAAAATAAATAAATAAAAATAAAACACTCCCAAGAAGTAGTCAAAAGAGTTTTCTTCATACTGATCAAAATTTCATCACAGATAGCTAGG…
4d0d4fbb-6991-4939-a3b6-e812128b50ac	Chr1	78235004	78234990	ALU	Alu_YRa4	0	269	+	+	N	AAAAACTCGGAACAG	Hippocampus.Single.WGS.ON22212.Neuron-#17|2,Hippocampus.Single.WGS.ON22213.Neuron-#15|11,Hippocampus.Single.WGS.ON22213.Neuron-#69|5,Hippocampus.Single.WGS.ON22213.Neuron-#39|1,Hippocampus.Single.WGS.ON22213.Neuron-#52|1,Liver.Bulk.WGS.ON22212|11,Liver.Bulk.WGS.ON22213|21,Hippocampus.Single.RC-seq.ON22212.Neuron-#16|3,Hippocampus.Single.RC-seq.ON22213.Neuron-#15|8,Hippocampus.Single.RC-seq.ON2221…	Hippocampus.Single.WGS.ON22212.Neuron-#16|1,Hippocampus.Single.WGS.ON22212.Neuron-#17|1,Hippocampus.Single.WGS.ON22213.Neuron-#15|10,Hippocampus.Single.WGS.ON22213.Neuron-#69|4,Hippocampus.Single.WGS.ON22213.Neuron-#39|1,Hippocampus.Single.WGS.ON22213.Neuron-#52|2,Liver.Bulk.WGS.ON22212|8,Liver.Bulk.WGS.ON22213|9,Hippocampus.Single.RC-seq.ON22213.Neuron-#15|4,Hippocampus.Single.RC-seq.ON22213.Neu…	ATTTTCTGTGCCTCAGTTTTCTTGTCTATAAAATGAGGGCAATAATAGTGCTTATCTTTTAGGATCATTGAAAGTGTTAAATGAATGAGCACTTATAAACTCGGAACAGTTTCTAGTGGATTATTATGGGCTTAAAAACTCGGAACAGGCCGGGCGCGGTGGCTCAAGCCTGTAATCCCAGCACTTTGGGATGGGGGCCGAGACGGGCGGATCACGAGGTCAGGAGATCGAGACCATCCTGGCTAACACGGTGAAACCCCGTCTCTAC	GCTGTCTATGGGTGTAAACCCGGGCGGTGGTGCTTGCTGTTTGCGGTTATCCGGCCACTGCACTCCAGCCTGGGGGACAGTGCCATAGTAAGTATAAAAAAAAAAAAAAAAAAAAAAAAAAAAACTCGGAACAGTTTCTAGCGGATTATTATGTGCTCTGCATTAGCTGTTTATCATCATCAGTATTACTCTGCGATTTATCACTAGGATTATTATATTTATATGAATTTAGATTTACTATTGGGATGCCAGTGAGGCCATCAAAAGTTT	ATAAAATGAGGGCAATAATAGTGCTTATCTTTTAGGATCATTGAAAGTGTTAAATGAATGAGCACTTATAAACTCGGAACAGTTTCTAGTGGATTATTATGGGCTTAAAAACTCGGAACAGGCCGGGCGCGGTGGCTCAAGCCTGTAATCCCAGCACTTTGGGATGGCCGAGACGGGCGGATCACGAGGTCAGGAGATCGAGACCATCCTGGCTAACACGGTGAAACCCCGTCTCTACTAAAAAATACAAAAAAACTAGCCGGGCGAAGTGGCGGGCGCCTGTGGTCCCAGCTACTCGGGAGGCTGAGGCAGGAGAATGGCGTGAACCCGGGAGGTGGAGCTTGCAGTGAGCTGAGATCCGGCCACTGCACTCCAGCCTGGGCGACAGAGCCAGACTCA…	ATAAAATGAGGGCAATAATAGTGCTTATCTTTTAGGATCATTGAAAGTGTTAAATGAATGAGCACTTATAAACTCGGAACAGTTTCTAGTGGATTATTATGGGCTTAAAAACTCGGAACAGGCCGGGCGCGGTGGCTCAAGCCTGTAATCCCAGCACTTTGGGATGGCCGAGACGGGCGGATCACGAGGTCAGGAGATCGAGACCATCCTGGCTAACACGGTGAAACCCCGTCTCTACTAAAAAATACAAAAAAACTAGCCGGGCGAAGTGGCGGGCGCCTGTGGTCCCAGCTACTCGGGAGGCTGAGGCAGGAGAATGGCGTGAACCCGGGAGGTGGAGCTTGCAGTGAGCTGAGATCCGGCCACTGCACTCCAGCCTGGGCGACAGAGCCAGACTCA…
c938b7ff-7725-4c54-8d15-7c339cdeb443	Chr1	78369500	78369514	ALU	Alu_YRd4	0	269	-	-	N	TACATGGCAAGTCTT	Hippocampus.Single.WGS.ON22212.Neuron-#19|2,Hippocampus.Single.WGS.ON22212.Neuron-#7|17,Hippocampus.Single.WGS.ON22213.Neuron-#69|5,Hippocampus.Single.WGS.ON22213.Neuron-#52|3,Liver.Bulk.WGS.ON22212|23,Liver.Bulk.WGS.ON22213|12,Hippocampus.Single.RC-seq.ON22212.Neuron-#19|2,Hippocampus.Single.RC-seq.ON22212.Neuron-#7|6,Hippocampus.Single.RC-seq.ON22213.Neuron-#69|1,Hippocampus.Single.RC-seq.ON222…	Hippocampus.Single.WGS.ON22212.Neuron-#19|1,Hippocampus.Single.WGS.ON22212.Neuron-#7|16,Hippocampus.Single.WGS.ON22213.Neuron-#69|1,Hippocampus.Single.WGS.ON22213.Neuron-#52|5,Liver.Bulk.WGS.ON22212|12,Liver.Bulk.WGS.ON22213|9,Hippocampus.Single.RC-seq.ON22212.Neuron-#16|1,Hippocampus.Single.RC-seq.ON22212.Neuron-#19|1,Hippocampus.Single.RC-seq.ON22212.Neuron-#7|6,Hippocampus.Single.RC-seq.ON2221…	TTTAGTAGAGACGGGGTTTCACCGTGTTAGCCAGGATGGTCTCGATCTCCTGACCTCGTGATCCGCCCGCCTCGGCCTCCCAAAGTGCTGGGATTACAGGCTTGAGCCACCGCGCCCGGCCTACATGGCAAGTCTTAAAAACACATTTTTTGTTTGCTGTGTAAGATTGGTATTATTTATTCTTTAATTATTAGTAGAACCTGCCAGTAATAAGTATCTGGATTTTCTTTGTAAGAGTCTATTCAAATTTTTATGCCCTCTTACATAA	GTCTTCACTTCTTTATGTCTTATTTTATCTCTTTAATAAAGTTTTATAATTTTATCTGTAATGGGATTTTACATTTAGTAAAATCCCGTGTTAGATTTAGTACTAAACATTTACTCCTTTCTTCCACTTTTACATGGCAAGTCTTTTTTTTTTTTTTTTTTTTTTTTTTTTTTTTTTAGGAGTATTAGGATGTTAGCCCAAAAAAGGGTGGCAGTGGGGCGTTCACGGCG	AAAATGTGTTTTTAAGACTTGCCATGTAGGCCGGGCGCGGTGGCTCAAGCCTGTAATCCCAGCACTTTGGGAGGCCGAGGCGGGCGGATCACGAGGTCAGGAGATCGAGACCATCCTGGCTAACACGGTGAAACCCCGTCTCTACTAAAAATACAAAAAGAAACTAGCCGGGCGAGGTGGCGGGCGCCTGTAGTCCCAGCTACTCCGGAGGCTGAGGCAGGAGAATGGCTCGGTGACCCCGGGAGGCGGAGCTTCCAGTGAGCCGAGATCGCGCCCCTGCACTCCAGTCTGGGAGACAGAGCGAGACTCCGTCTAAAAAAAAAAAAAAAAAAAAAAAAAAAAAAAAGAAACTTGCCAAGGAAAATTGGAAGAAAGGTTTAAATTTTTATTACAAA	AAAATGTGTTTTTAAGACTTGCCATGTAGGCCGGGCGCGGTGGCTCAAGCCTGTAATCCCAGCACTTTGGGAGGCCGAGGCGGGCGGATCACGAGGTCAGGAGATCGAGACCATCCTGGCTAACACGGTGAAACCCCGTCTCTACTAAAAATACAAAAAGAAACTAGCCGGGCGAGGTGGCGGGCGCCTGTAGTCCCAGCTACTCCGGAGGCTGAGGCAGGAGAATGGCTCGGTGACCCCGGGAGGCGGAGCTTCCAGTGAGCCGAGATCGCGCCCCTGCACTCCAGTCTGGGAGACAGAGCGAGACTCCGTCTAAAAAAAAAAAAAAAAAAAAAAAAAAAAAAAAGAAACTTGCCAAGGAAAATTGGAAGAAAGGTTTAAATTTTTATTACAAA
8c2bea27-1fb6-4f9b-b8bb-bfdd585a1e11	Chr1	78831109	78831097	ALU	Alu_YRa4	0	270	-	-	N	TCTTTGTATTTTT	Hippocampus.Single.WGS.ON22213.Neuron-#14|2,Hippocampus.Single.WGS.ON22213.Neuron-#15|1,Hippocampus.Single.WGS.ON22213.Neuron-#38|1,Liver.Bulk.WGS.ON22213|14,Hippocampus.Single.RC-seq.ON22213.Neuron-#14|2	Hippocampus.Single.WGS.ON22213.Neuron-#14|1,Liver.Bulk.WGS.ON22213|13,Hippocampus.Single.RC-seq.ON22213.Neuron-#14|1,Hippocampus.Single.RC-seq.ON22213.Neuron-#38|1	ATATCTATCTGCAACAGAACATGTTGAGTGTTGCTTTCCATTGAGTGCTCATGCAAACAAAGGAAGGAGAGTAAAGAGATTCAAGGCAAACCTTCCTGTGTGGGGGTTGGGAGGATCCACTCTTTTAGCAGTCCATCTTTGTATTTTTTTTTTTTTTTTTTGAGACGGAGTCTCACGCTGTTGCCCAGGCTGGAGTGCAGTGGCGCGGTCTCGGCTCACTGCAAGCTCCGGCCTCCCGGGTTCCCGCCATTCTTCCTGCCTCAGCCTCCTGAG	CCTGGAAATAAAAGGAAACAATTACATTAATTTTTTTAATACACAATAAATATATACAGTTTTTATTTGTCAATTAAAATAAATGAAATTAAAGATAATCCTATACATATATTTACTCCTTTGTATTGCCTTAGATCCTTCCTATGAACAAAGCTAGGCACATTAGTCCCCATACAATCACCAACATGGCCAATACAAGGCCACATTAAAAATACAAAGACGGGCCGGGCGCGGTGGCTCAAGCCTGTAATCCCAGCACTTTGGGAGGCCGAGGCGGGCGGATCACAAGGTCAGGAGATCGAGACCACAGTGAAACCCCGTCTCTACTAAAAATACAAAAAATTAGCCGGGCGCGGTGGCGGGCGCCTGTAGTCCCAGCTACTCAGGAGGCTGAGGCAG…	CAATCACCAACATGGCCAATACAAGGCCACATTAAAAATACAAAGATGGGCCGGGCGCGGTGGCTCAAGCCTGTAATCCCAGCACTTTGGGAGGCCGAGGCGGGCGGATCACAAGGTCAGGAGATCGAGACCACAGTGAAACCCCGTCTCTACTAAAAATACAAAAAATTAGCCGGGCGCGGTGGCGGGCGCCTGTAGTCCCAGCTACTCAGGAGGCTGAGGCAGGAGAATGGCGGGAACCCGGGAGGCGGCGAGCTTGCAGTGAGCCGAGACCGCGCCACTGCACTCCAGCCTGGGCAACAGCGTGAGACTCCGTCTCAAAAAAAAAAAAAAATACAAAGATAAAGGAATGCCTAAAAAAGGGGATCCTCCCCAACCCCCCCCACACAGGAAGGTTTG…	CAATCACCAACATGGCCAATACAAGGCCACATTAAAAATACAAAGATGGGCCGGGCGCGGTGGCTCAAGCCTGTAATCCCAGCACTTTGGGAGGCCGAGGCGGGCGGATCACAAGGTCAGGAGATCGAGACCACAGTGAAACCCCGTCTCTACTAAAAATACAAAAAATTAGCCGGGCGCGGTGGCGGGCGCCTGTAGTCCCAGCTACTCAGGAGGCTGAGGCAGGAGAATGGCGGGAACCCGGGAGGCGGCGAGCTTGCAGTGAGCCGAGACCGCGCCACTGCACTCCAGCCTGGGCAACAGCGTGAGACTCCGTCTCAAAAAAAAAAAAAAATACAAAGATAAAGGAATGCCTAAAAAAGGGGATCCTCCCCAACCCCCCCCACACAGGAAGGTTTG…
9ffc551c-352e-4bc8-b510-6e7847b04233	Chr1	78976393	78976378	ALU	Alu_YRa4	0	270	+	+	N	AAAAAAAGCATTTTCT	Hippocampus.Single.WGS.ON22213.Neuron-#14|1,Hippocampus.Single.WGS.ON22213.Neuron-#15|2,Hippocampus.Single.WGS.ON22213.Neuron-#23|1,Liver.Bulk.WGS.ON22213|11,Hippocampus.Single.RC-seq.ON22213.Neuron-#14|1,Hippocampus.Single.RC-seq.ON22213.Neuron-#15|2	Hippocampus.Single.WGS.ON22213.Neuron-#15|1,Hippocampus.Single.WGS.ON22213.Neuron-#23|1,Liver.Bulk.WGS.ON22213|9	CATGGATTTATTTGGAAAAATAAAGCATTACAATAGAAGTCCAAGCTTATCATGTGCAGGCCTTTTCCTGCCAACTTATAAGCAACAAACTGGGGTATTTCTTCTTCCTCTTTGAGATAGAGTACATTCCAGGAGGAAGCTGATGCCAAGTATTTGGATAAACAGCTAAGATTTGAGAACCAGCTCTGCAGCAGTGGGGGAGATTTTTTCTAATACTTCCTAAGGCTGGTGTGCTACAGGTTTGTAGCAATTATTTCTTTTTTTTAAAAAAAAGCATTTTCTGGCCGGGCGCGGTGGCTCAAGCCTGTAATCCCAGCACTTTGGGAGGCCGAGACGGGCGGATCATGAGGTCAGGAGATTGAGACCATCCTGGCTAACACGGTGAAACCCCGTCTCTAC…	GTGAACCCGGGGGTGCGGAGCTTGCAGTGAGCCGATATCGCGCCACTGCACTCCAGCCTGGGGCACAGAGCAAGACTCCGCGTCAAAAAAAAAAAAAAAAAAAAAAAAAAAGCATTTTCTTCTCATGAGGGAAAAGACCTCTCGAATGAACTAAAGGGGACAGATGAAGACTTGGAAAACTCTGTCATCACCCCTGAGCCTCTGTAACTATTATTTATAGGGCACTCGGGTAGCTTATTGGGCCAGTCATC	CTACAGGTTTGTAGCAATTATTTCTTTTTTTTAAAAAAAAGCATTTTCTGGCCGGGCGCGGTGGCTCAAGCCTGTAATCCCAGCACTTTGGGAGGCCGAGACGGGCGGATCATGAGGTCAGGAGATTGAGACCATCCTGGCTAACACGGTGAAACCCCGTCTCTACTAAAAATACAAGAAAATTAGCCGGGCGAGGTGGCGGGCGCCTGTAGTCCCAGCTACTCCGGAGGCTGAGGCAGGAGAATGGCGTGAACCCGGGGGAGCGGAGCTTGCAGTGAGCCGAGATCGCGCCACTGCACTCCAGCCTGGGGCACAGAGCAAGACTCCGCGTCAAAAAAAAAAAAAAAAAAAAAAAAAAGCATTTTCTTCTCATGAGGGAAAAGACCTCTCGAATGAACA…	CTACAGGTTTGTAGCAATTATTTCTTTTTTTTAAAAAAAAGCATTTTCTGGCCGGGCGCGGTGGCTCAAGCCTGTAATCCCAGCACTTTGGGAGGCCGAGACGGGCGGATCATGAGGTCAGGAGATTGAGACCATCCTGGCTAACACGGTGAAACCCCGTCTCTACTAAAAATACAAGAAAATTAGCCGGGCGAGGTGGCGGGCGCCTGTAGTCCCAGCTACTCCGGAGGCTGAGGCAGGAGAATGGCGTGAACCCGGGGGAGCGGAGCTTGCAGTGAGCCGAGATCGCGCCACTGCACTCCAGCCTGGGGCACAGAGCAAGACTCCGCGTCAAAAAAAAAAAAAAAAAAAAAAAAAAGCATTTTCTTCTCATGAGGGAAAAGACCTCTCGAATGAACA…
d6d7e7b8-cfc7-4bac-8d1a-a066d354fc77	Chr1	79635495	79635479	ALU	Alu_YRa4	0	270	-	-	N	CCAAAAAAGGGATTCTT	Hippocampus.Single.WGS.ON22212.Neuron-#16|14,Hippocampus.Single.WGS.ON22212.Neuron-#19|1,Liver.Bulk.WGS.ON22212|15,Hippocampus.Single.RC-seq.ON22212.Neuron-#16|8,Hippocampus.Single.RC-seq.ON22212.Neuron-#19|1	Hippocampus.Single.WGS.ON22212.Neuron-#16|13,Hippocampus.Single.WGS.ON22212.Neuron-#19|6,Liver.Bulk.WGS.ON22212|15,Hippocampus.Single.RC-seq.ON22212.Neuron-#16|6,Hippocampus.Single.RC-seq.ON22212.Neuron-#19|2	AAGAAACCAAAAATAAACTTATGTTAACAATTAACATTTCAGCATTTAACTTTATTTTGGAAATGATTCAGACATTTAATGAATATTTACTATTTAATTCAATATAACATACACTTAAGATTCCATTTATCCAAAAAAGGGATTCTTTTTTTTTTTTTTTTTTTTTTTTTTTTTTTTGGAGACAGGGGTTTTTTCTTTTTTACCCACAGGGTGTGTGTT	TGAGCCCAGGAGTTTGAGACCAGCTTGGGCAACATAGTGAGACCCCTTCTCTAAAAAAAAAATTAAAAATTATTTGGGCGTGGTGGTGAACATCTCTGGTCCTAGTTACTTGAGAGGCTGAGATGGGAGGATCACTTAGGCCCAGGAGTTTGAGGCTGCAGTGAGCTGTGATTACACCACTGAACTCCAGCCTAGGTGACATAGCAAGACCCCATCTCAAATAAAAAGAGATTATGTTTTATAAAACATCTCTCTTTAAAAATAGTCTTAAGAATCCCTTTTTTGGGCCGGGCGCGGTGGCTCACGCCTGTAATCCCAGCACTTTGGGAGGCCGAGACGGGCGGATCACAAGGTCAGGAGATCGAGACCATCCTGGCTAACACGGTGAAACCCCGTCTC…	ATAGTCTTAAGAATCCCTTTTTTGGGCCGGGCGCGGTGGCTCACGCCTGTAATCCCAGCACTTTGGGAGGCCGAGACGGGCGGATCACAAGGTCAGGAGATCGAGACCATCCTGGCTAACACGGTGAAACCCCGTCTCTACTAAAAGTACAAAAAAAACTAGCCGGGTCGAGAGGGTGGCGGGCGCCTGTAGTCCCAGCTACTCGGGAGGCTGAGGTTGGAGAATGGCGTAAACCCAGGAGGCGGAGCTTGTAGTGAGCCGAGTTCGCACCACTGCACTCCAGCCTGGGTGACAGAGCAAAGACTCCGTCTCAAAAAAAGAAAAAAAAAAAAAAAAAAAAAAAAATCCTTTTTTTGGAATAAAATGAATATTTAAAAGTGTATTTTATATTGAATTAAA…	ATAGTCTTAAGAATCCCTTTTTTGGGCCGGGCGCGGTGGCTCACGCCTGTAATCCCAGCACTTTGGGAGGCCGAGACGGGCGGATCACAAGGTCAGGAGATCGAGACCATCCTGGCTAACACGGTGAAACCCCGTCTCTACTAAAAGTACAAAAAAAACTAGCCGGGTCGAGAGGGTGGCGGGCGCCTGTAGTCCCAGCTACTCGGGAGGCTGAGGTTGGAGAATGGCGTAAACCCAGGAGGCGGAGCTTGTAGTGAGCCGAGTTCGCACCACTGCACTCCAGCCTGGGTGACAGAGCAAAGACTCCGTCTCAAAAAAAGAAAAAAAAAAAAAAAAAAAAAAAAATCCTTTTTTTGGAATAAAATGAATATTTAAAAGTGTATTTTATATTGAATTAAA…
583fcd46-2f3c-4674-b738-e5a8ab727e3d	Chr1	80642235	80642217	ALU	Alu_YRa4	0	270	+	+	N	TTAAAATACTAGTTCTTGC	Hippocampus.Single.WGS.ON22212.Neuron-#10|33,Hippocampus.Single.WGS.ON22212.Neuron-#19|13,Hippocampus.Single.WGS.ON22212.Neuron-#21|10,Hippocampus.Single.WGS.ON22212.Neuron-#7|4,Liver.Bulk.WGS.ON22212|28,Hippocampus.Single.RC-seq.ON22212.Neuron-#10|5,Hippocampus.Single.RC-seq.ON22212.Neuron-#19|6,Hippocampus.Single.RC-seq.ON22212.Neuron-#21|1,Hippocampus.Single.RC-seq.ON22212.Neuron-#7|2	Hippocampus.Single.WGS.ON22212.Neuron-#10|17,Hippocampus.Single.WGS.ON22212.Neuron-#19|8,Hippocampus.Single.WGS.ON22212.Neuron-#21|5,Liver.Bulk.WGS.ON22212|30,Hippocampus.Single.RC-seq.ON22212.Neuron-#19|1,Hippocampus.Single.RC-seq.ON22212.Neuron-#21|2	TCTGCCCTGTCTTCCTAACAAGCATTTTTGAACACTTTTTTTTTTTTTATTAAGCCATTTATCTAGTCATTTTAAAAGTCTGTCTCTAGCCGTTCACATAAAGAGCCAGCATTATTTTTCAAAGCATTTTAAAATACTAGTTCTTGCCGGGCGCGGTGGCTCCCAAAGCCTGTAATCCCAGCACTTTGGGAGGCCGAGACGGGCGGATCACGAGGTCAGGAGTTCGTAGACCATCCTGGCTAACACGGTGAAACCCCGTCTCTACTAAAAAA	TCAAAGCATTTTAAAATACTAGTTCTTGCCGGGCGCGGTGGCTCAAGCCTGTAATCCCAGCACTTTGGGAGGCCGAGACGGGCGGATCACGAGGTCAGGAGTTCGAGACCATCCTGGCTAACACGGTGAAACCCCGTCTCTACTAAAAAATACAAAAAACTAGCCGGGCGAGGTGGCGGGCGCCTGTAGTCCCGGCTACTCGGGAGGCTGAGGCAGGAGAATGGCGTAAAAACCCGAGAGGCAGAGCTTGCAGTGAGCTGAGATCCGGCCACTGCACTCCAGCCTGGGTGACACAGCGAGACTCCGTCTCAAAAAAAAAAATAAAATAAAATAAAATAAAAATAAAAAATAAAATACTAGTTCTTGCCTACCTTATGGAGGGATCATTTTTATTGCCTA…	ATTCTTGAACACTTTTTTTTTTTTATTAAGCCATTTATCTAGTCATTTTAAAAGTCTGTCTCTAGCCGTTCACATAAAGAGCCAGCATTATTTTTCAAAGCATTTTAAAATACTAGTTCTTGCCGGGCGCGGTGGCTCAAGCCTGTAATCCCAGCACTTTGGGAGGCCGAGACGGGCGGATCACGAGGTCAGGAGTTCGTAGACCATCCTGGCTAACACGGTGAAACCCCGTCTCTACTAAAAAATACAAAAAACTAGCCGGGCGAGGTGGCGGGCGCCTGTAGTCCCGGCTACTCGGGAGGCTGAGGCAGGAGAATGGCGTAAAAACCCGAGAGGCAGAGCTTGCAGTGAGCTGAGATCCGGCCACTGCACTCCAGCCTGGGTGACACAGCGAGACTC…	ATTCTTGAACACTTTTTTTTTTTTATTAAGCCATTTATCTAGTCATTTTAAAAGTCTGTCTCTAGCCGTTCACATAAAGAGCCAGCATTATTTTTCAAAGCATTTTAAAATACTAGTTCTTGCCGGGCGCGGTGGCTCAAGCCTGTAATCCCAGCACTTTGGGAGGCCGAGACGGGCGGATCACGAGGTCAGGAGTTCGTAGACCATCCTGGCTAACACGGTGAAACCCCGTCTCTACTAAAAAATACAAAAAACTAGCCGGGCGAGGTGGCGGGCGCCTGTAGTCCCGGCTACTCGGGAGGCTGAGGCAGGAGAATGGCGTAAAAACCCGAGAGGCAGAGCTTGCAGTGAGCTGAGATCCGGCCACTGCACTCCAGCCTGGGTGACACAGCGAGACTC…
db43b7cc-ff68-452c-9d35-f5247a9c360f	Chr1	83231913	83231896	ALU	Alu_YRa4	0	269	+	+	N	AAAAAAATACAAAATTAG	Hippocampus.Single.WGS.ON22213.Neuron-#15|1,Hippocampus.Single.WGS.ON22213.Neuron-#25|4,Hippocampus.Single.WGS.ON22213.Neuron-#52|2,Hippocampus.Single.WGS.ON22213.Neuron-#49|1,Liver.Bulk.WGS.ON22213|9,Hippocampus.Single.RC-seq.ON22213.Neuron-#25|2,Hippocampus.Single.RC-seq.ON22213.Neuron-#31|1	Hippocampus.Single.WGS.ON22212.Neuron-#37|1,Hippocampus.Single.WGS.ON22213.Neuron-#14|1,Hippocampus.Single.WGS.ON22213.Neuron-#15|1,Hippocampus.Single.WGS.ON22213.Neuron-#25|7,Hippocampus.Single.WGS.ON22213.Neuron-#31|2,Hippocampus.Single.WGS.ON22213.Neuron-#52|3,Liver.Bulk.WGS.ON22213|5,Hippocampus.Single.RC-seq.ON22213.Neuron-#25|3	AGAAATTCTAGGCTGGGTGTGGTGGCTTACACCTATAATCTCGGCACTTTGGGAGGCTGAGGTGGGTGGATCATCTGAGGTCAGGAATTTGAGACCGGCCTGGCCAACATGGTGAAACCCCGTCTCTACTAAAAAAATACAAAATTAGGCCGGGCGCGGTGGCTCAAGCCTGTAATCCCAGCACTTTGGGAGGCCGAGATGGGCGGA	GTCCATGGTCTTGGGTTGGTTTTGGATGTTTATGGGGTTAAACCCTGTCGGGGTTGATTGATGTTTGTTTTTTTCGGGCATTTGAACGCATGCAGGGGGGAATTTGCTTGATTCGTTTTAAAAAAAAAAAAAAAATACAAAATTAGCCGGGTGTGGTGGTGGGCACCTGTAATCCCAGCTACTCAGGAGGCTGAGGCAGGAGAATCGCTTGAACCCAGGAGGCGGAGGTTGCAGTGAGCCGAGATTCACATCACTGCATTCCAGCTAGTCAACAAGA	ACCTATAATCTCGGCACTTTGGGAGGCTGAGGTGGGTGGATCATCTGAGGTCAGGAATTTGAGACCAGCCTGGCCAACATGGTGAAACCCCGTCTCTACTAAAAAAATACAAAATTAGGCCGGGCGCGGTGGCTCAAGCCTGTAATCCCAGCACTTTGGGAGGCCGAGATGGGCGGATCACGAGGTCAGGAGATCGAGACCATCCTGGTTAACACAGTGAAACCCCATCTCTACTAAAAAAATACAAAAAACTAGCCGGGCGTGGTGGCGGGCGCCTGTAGTCCCAGCTACTCGGGAGGCTGAGGCAGGAGAATGGCATGTAAACCCAGGAGGCGGAGCATGCAGTGAGCTGAGATCCGGCCATTGCACTCCAGCCTGGGCGAAATAGCGAGACTCCGT…	ACCTATAATCTCGGCACTTTGGGAGGCTGAGGTGGGTGGATCATCTGAGGTCAGGAATTTGAGACCAGCCTGGCCAACATGGTGAAACCCCGTCTCTACTAAAAAAATACAAAATTAGGCCGGGCGCGGTGGCTCAAGCCTGTAATCCCAGCACTTTGGGAGGCCGAGATGGGCGGATCACGAGGTCAGGAGATCGAGACCATCCTGGTTAACACAGTGAAACCCCATCTCTACTAAAAAAATACAAAAAACTAGCCGGGCGTGGTGGCGGGCGCCTGTAGTCCCAGCTACTCGGGAGGCTGAGGCAGGAGAATGGCATGTAAACCCAGGAGGCGGAGCATGCAGTGAGCTGAGATCCGGCCATTGCACTCCAGCCTGGGCGAAATAGCGAGACTCCGT…
05f89cb7-bab1-4260-9452-39e93b347e6e	Chr1	83720466	83720481	ALU	Alu_YRa4	0	269	-	-	N	AAGAGTCACAGATTTG	Hippocampus.Single.WGS.ON22213.Neuron-#39|38,Hippocampus.Single.WGS.ON22213.Neuron-#52|1,Liver.Bulk.WGS.ON22213|9,Hippocampus.Single.RC-seq.ON22213.Neuron-#39|56	Hippocampus.Single.WGS.ON22213.Neuron-#14|1,Hippocampus.Single.WGS.ON22213.Neuron-#39|67,Liver.Bulk.WGS.ON22213|11,Hippocampus.Single.RC-seq.ON22213.Neuron-#39|33	ATTTTTTAGTAGAGACGGGGTTTCACTGTGTCAGCCAGGATGGTCTCGATCTCCTGACCTCGTGATCCGCCCGTCTCGGCCTCCCAAAGTGCTGGGATTACAGGCTTGAGCCACCGCGCCCGGCCAAGAGTCACAGATTTGAAGAAGCTCTGGTGGCTCTGGGAAGATGGAGGAAGGGGCAAAGTA	GTTTAACTTCTGGAACCTGTGAATATGTTAGGTTACTTGCAAAGGCAGAATTAAGGTTGCAGGTGACCTTTTCCTGAACTACTCATGTGGGCCCAATGTAATCATAAGGGTCCTCATAAATGGAAGGGGAGAAAGAGTCACAGATTTGTTTATTTATTTTTTTTTTTTTGAGACAGAGTCTCGCTCTGCCGCCCACGGGGGCTTGATTGCAGTGGCCGTGTGATCTTGGCTCACTGCAAGCTCCGCCTCCCGGAGGTGTTCACGCCATTCTCCTGCCTCA	TGTTTATGCCCCTTCCTCCATCTTCAGAGCCACCAGAGCTTCTTCAAATCTGTGACTCTAGGCCGGGCGCGGTGGCTCAAGCCTGTAATCCCAGCACTGTGGTAGGCCGAGACGGGCGGATCACTAGTTCAGGAGAACGAGAACATCCTGGCTGACACAGTGAAACCCCGTCTCTACTAAAAAATACAAAAAAACTAGCCGGGCGAGGTGGCGGGCGCCTGTAGTCCCAGCTACTCGTGGAGGCTGAGGCAGGAGAATGGCGTGAACCCGGGAGGCGGAGCTTGCAGTGAGCCAAGATCACGCCACTGCACTCCAGCCTGGGCGGCAGAGCGAGACTCTGTCTCAAAAAAAAAAAAATAAATAAACAAATCTGTGACTCTTTCTCCCCTTCCATTTATG…	TGTTTATGCCCCTTCCTCCATCTTCAGAGCCACCAGAGCTTCTTCAAATCTGTGACTCTAGGCCGGGCGCGGTGGCTCAAGCCTGTAATCCCAGCACTGTGGTAGGCCGAGACGGGCGGATCACTAGTTCAGGAGAACGAGAACATCCTGGCTGACACAGTGAAACCCCGTCTCTACTAAAAAATACAAAAAAACTAGCCGGGCGAGGTGGCGGGCGCCTGTAGTCCCAGCTACTCGTGGAGGCTGAGGCAGGAGAATGGCGTGAACCCGGGAGGCGGAGCTTGCAGTGAGCCAAGATCACGCCACTGCACTCCAGCCTGGGCGGCAGAGCGAGACTCTGTCTCAAAAAAAAAAAAATAAATAAACAAATCTGTGACTCTTTCTCCCCTTCCATTTATG…
a70e46ae-f67f-4aec-9e4f-ca108741601b	Chr1	83747180	83747197	ALU	Alu_YRa4	0	269	-	-	N	CCACATGCATTATTTTTT	Hippocampus.Single.WGS.ON22213.Neuron-#14|1,Hippocampus.Single.WGS.ON22213.Neuron-#15|2,Hippocampus.Single.WGS.ON22213.Neuron-#38|1,Hippocampus.Single.WGS.ON22213.Neuron-#39|37,Liver.Bulk.WGS.ON22213|15,Hippocampus.Single.RC-seq.ON22213.Neuron-#39|7	Hippocampus.Single.WGS.ON22213.Neuron-#15|4,Hippocampus.Single.WGS.ON22213.Neuron-#39|42,Liver.Bulk.WGS.ON22213|14,Hippocampus.Single.RC-seq.ON22213.Neuron-#69|1,Hippocampus.Single.RC-seq.ON22213.Neuron-#38|3,Hippocampus.Single.RC-seq.ON22213.Neuron-#39|9	TTTTTAGTAGAGACGGGGTTTCACCGTGTTAGCCAGGATGGTCTCGATCTTCTGACCTCGTGATCCGCCCGTCTCGGCCTCCCAAAGTGCTGGGATTACAGGCTTGAGCCACCGCGCCCGGCCACATGCATTATTTTTTAAATGTCACTGAGAATTAACTGGGAAGGAAGATTATGGCTAATTTCAAAAATATTTATATTATGTACATACTTGTATTTTTTTTTTTTTTTTTTTTTTTTTTTTTTTTGAGACAGAGTTTTGCTCT	CAGCCGTATAGTAGGGATCTTTTGGATTGAAATATTTATGTAGATTAAAAAATAAAATATATGGGATATATATGAATGAGATTTAACCTTTCATTTCCTACTTTCTATACTGTTTGAATTTTCCAATCTTCCACATGCATTATTTTTTTTTTTTTTTTTTTTTTTTTTTTTTTTGGGCGATTATCACC	GAAATTAGCCATAATCTTCCTTCCCAGTTAATTCTCAGTGACATTTAAAAAATAATGCATGTGGCCGGGCGCGGTGGCTCAAGCCTGTAATCCCAGCACTTTGGGAGGCCGAGACGGGCGGATCACGAGGTCAGAAGATCGAGACCATCCTGGCTAACACGGTGAAACCCCGTCTCTACTAAAAAAATACAAAAAACTAGCCGGGCGCGGTGGCGGGCGCCTGTAGTCCCAGCTACTCAGGAGGCTGAGGCAGGAGAATGGCGTGAACCTGGGAGGCGGAGCTTGCAGTGAGCTGAGATCCGGCCACTGCACTCCAGCCTGGGCGGCAGAGCGAGACTCCGTCTCAAAAAAAAAAAAAAAAAAAAAAAAAAAAAGCCAGTGGAAGAATGGAAATAATTC…	GAAATTAGCCATAATCTTCCTTCCCAGTTAATTCTCAGTGACATTTAAAAAATAATGCATGTGGCCGGGCGCGGTGGCTCAAGCCTGTAATCCCAGCACTTTGGGAGGCCGAGACGGGCGGATCACGAGGTCAGAAGATCGAGACCATCCTGGCTAACACGGTGAAACCCCGTCTCTACTAAAAAAATACAAAAAACTAGCCGGGCGCGGTGGCGGGCGCCTGTAGTCCCAGCTACTCAGGAGGCTGAGGCAGGAGAATGGCGTGAACCTGGGAGGCGGAGCTTGCAGTGAGCTGAGATCCGGCCACTGCACTCCAGCCTGGGCGGCAGAGCGAGACTCCGTCTCAAAAAAAAAAAAAAAAAAAAAAAAAAAAAGCCAGTGGAAGAATGGAAATAATTC…
8a663971-bd80-4be1-af57-16a877a2ba8a	Chr1	83755487	83755502	ALU	Alu_YRb4	0	257	-	-	N	TCCATTTCATTTTTTT	Hippocampus.Single.WGS.ON22212.Neuron-#10|32,Hippocampus.Single.WGS.ON22212.Neuron-#17|2,Hippocampus.Single.WGS.ON22212.Neuron-#19|7,Hippocampus.Single.WGS.ON22212.Neuron-#21|1,Liver.Bulk.WGS.ON22212|8,Hippocampus.Single.RC-seq.ON22212.Neuron-#10|7,Hippocampus.Single.RC-seq.ON22212.Neuron-#17|2,Hippocampus.Single.RC-seq.ON22212.Neuron-#19|3,Hippocampus.Single.RC-seq.ON22213.Neuron-#47|1	Hippocampus.Single.WGS.ON22212.Neuron-#10|30,Hippocampus.Single.WGS.ON22212.Neuron-#17|4,Hippocampus.Single.WGS.ON22212.Neuron-#19|7,Hippocampus.Single.WGS.ON22212.Neuron-#21|3,Hippocampus.Single.WGS.ON22212.Neuron-#7|1,Hippocampus.Single.WGS.ON22213.Neuron-#39|3,Liver.Bulk.WGS.ON22212|7,Hippocampus.Single.RC-seq.ON22212.Neuron-#10|10,Hippocampus.Single.RC-seq.ON22212.Neuron-#17|2,Hippocampus.Sin…	TTTGTATTTTTAGTAGAGACGGGGTTTCACCGTGGTCTCGATCTCCTGACCTTGTGATCCGCCCGCCTCGGCCTCCCAAAGTGCTGGGATTACAGGCGTGAGCCACCGCGCCCGGCTCCATTTCATTTTTTTAAGAGACAGGGTTGGCCAGGCATGGTGGCTCACGCCTGTAATCCCAGCGCTTTGTGGGGGAAGGCCAAGGTGTTCAGTTCACTTGAGGTCAGTAGTTCAAGACCAGACTGAGAAACATGGTGAAACCCCGTCTCTAC	TATCTATACAATGGAATATTATTCAGTCATAAAAGGAGTAAAGTTCTGATACATGCCATAACATTAGATGAATCTCAAAAACACTACACTAAGTGAAAGAAACCAGGCACAAAAGGTCACATCTTGTATGATTCCATTTCATTTTTTTCTTTTTTTTTTTTTTTTTTTTTGAGTTGTCG	TCTGGTCTTGAACTACTGACCTCAAGTGATCTGAACACCTTGGCCTCCCAAAGCGCTGGGATTACAGGCGTGAGCCACCATGCCTGGCCAACCCTGTCTCTTAAAAAAATGAAATGGAGCCGGGCGCGGTGGCTCACGCCTGTAATCCCAGCACTTTGGGAGGCCGAGGCGGGCGGATCACAAGGTCAGGAGATCGAGACCACGGTGAAACCCCGTCTCTACTAAAAATACAAAAAATTAGCCGGGCGCGGTTGTGGGCACCTGTAGTCCCAGCTACTCGGGAGGCTGAGGCAGAGAGAATGGCGGGAACCCCCGGGAGGCGGAGCTTGCAGTGAGCTGAGATCCGGCCACTGCACTCCAGCCTGGGCGGCAGAGCGAGACTCCGTCTCAAAAAAAAAA…	TCTGGTCTTGAACTACTGACCTCAAGTGATCTGAACACCTTGGCCTCCCAAAGCGCTGGGATTACAGGCGTGAGCCACCATGCCTGGCCAACCCTGTCTCTTAAAAAAATGAAATGGAGCCGGGCGCGGTGGCTCACGCCTGTAATCCCAGCACTTTGGGAGGCCGAGGCGGGCGGATCACAAGGTCAGGAGATCGAGACCACGGTGAAACCCCGTCTCTACTAAAAATACAAAAAATTAGCCGGGCGCGGTTGTGGGCACCTGTAGTCCCAGCTACTCGGGAGGCTGAGGCAGAGAGAATGGCGGGAACCCCCGGGAGGCGGAGCTTGCAGTGAGCTGAGATCCGGCCACTGCACTCCAGCCTGGGCGGCAGAGCGAGACTCCGTCTCAAAAAAAAAA…
3203d537-905a-424c-8744-792cc0ff86ea	Chr1	83826314	83826331	ALU	Alu_YRa4	0	269	+	+	N	AAAAAAGTGTACTGAATC	Liver.Bulk.WGS.ON22212|11	Hippocampus.Single.WGS.ON22212.Neuron-#21|1,Liver.Bulk.WGS.ON22212|15	TGTTTTGGGGGGGAACGGGGTGGGGGTGTTTGATGTGTGTTGTGTGCGGGCCTCTGAATTCACGGCGGGGGGGCCTGGCGTTACAACATATTATAAAAAAAAAAAAAAAAAAAAAAAAAAAAAGTGTACTGAATCAAAAATCAAATATAACAAGGATCGATAAAAATATCACTATGTAGACATAGCGTAGTAGTACTTAGCTTCTGGCTCCCATTGCTTATGGATCTCTCTCAAACTCACACACACAACACCTGTTCA	GACTGTAACAAATATACCACTCTGGTGGGAGATAATAGGGGGAGACTACACAGGTGTGGGGTCAGGAAGTATATGGGAAATATCTGTATCTTCTTCTCAATTTTGCTATGAACCTAAAACCTCTCTAAAGAAAAAAGTGTACTGAATCGGCCGGGCGCGGTGGCTCAAGCCTGTAATCCCAGCACTTTGGGAGGCCGAGACGGGCGGATCACGAGGTCGGGAGATCGAGACCATCCTGGCTAACATGGTGAAACCCCATGTGTC	GGGGAGACTACACAGGTGTGGGGTCAGGAAGTATATGGGAAATATCTGTATCTTCTTCTCAATTTTGCTATGAACCTAAAACCTCTCTAAAGAAAAAAGTGTACTGAATCGGCCGGGCGCGGTGGCTCAAGCCTGTAATCCCAGCACTTTGGGAGGCCGAGACGGGCGGATCACGAGGTCGGGAGATCGAGACCATCCTGGCTAACATGGTGAAACCCCGTCATTTCTA	GGGGAGACTACACAGGTGTGGGGTCAGGAAGTATATGGGAAATATCTGTATCTTCTTCTCAATTTTGCTATGAACCTAAAACCTCTCTAAAGAAAAAAGTGTACTGAATCGGCCGGGCGCGGTGGCTCAAGCCTGTAATCCCAGCACTTTGGGAGGCCGAGACGGGCGGATCACGAGGTCGGGAGATCGAGACCATCCTGGCTAACATGGTGAAACCCCGTCATTTCTA
c96b9e5e-36f1-489c-998c-8049f466fce6	Chr1	84768709	84768726	ALU	Alu_YRa4	0	270	-	-	N	CATTGCTATAATTTTTCT	Hippocampus.Single.WGS.ON22212.Neuron-#19|16,Hippocampus.Single.WGS.ON22212.Neuron-#21|20,Liver.Bulk.WGS.ON22212|14,Hippocampus.Single.RC-seq.ON22212.Neuron-#16|1,Hippocampus.Single.RC-seq.ON22212.Neuron-#19|3,Hippocampus.Single.RC-seq.ON22212.Neuron-#21|11	Hippocampus.Single.WGS.ON22212.Neuron-#19|9,Hippocampus.Single.WGS.ON22212.Neuron-#21|15,Liver.Bulk.WGS.ON22212|13,Hippocampus.Single.RC-seq.ON22212.Neuron-#19|5,Hippocampus.Single.RC-seq.ON22212.Neuron-#21|2	ATTTATTTTATAATATACTGAATTATCATATAAGCCATATATATTATTGTGGGTTATAGTGAGAATTGTTTAAAAGCCATAGTATAAAGAGTTTTGTATGCGCTAGTTGCATAGTTGTTGAACTGAATGTAATGATGTTTTAACTGGATTTAATTTTATTTAATATACAAAATTTTAGGGGTGAATGTATCATGCAAATATAATCTGCATGGGTTTGTTAACAACATTTGCAAGAGCAGATTAAAACACATGCCACATCTTTGCCTAGAAAAATTATAGCAATGGCCGGGCGTGGTGGCTCAAGCCTGTAATCCCAGCACTTTGGGAGGCCGAGACGGGCGGATCACGAGGTCAGTAGATCGAGACCATCCTGGCTAACACGGTGAAACCCCGTCTCTA…	ATTTATTTTATAATATACTGAATTATCATATAAGCCATATATATTATTGTGGGTTATAGTGAGAATTGTTTAAAAGCCATAGTATAAAGAGTTTTGTATGCGCTAGTTGCATAGTTGTTGAACTGAATGTAATGATGTTTTAACTGGATTTAATTTTATTTAATATACAAAATTTTAGGGGTGAATGTATCATGCAAATATAATCTGCATGGGTTTGTTAACAACATTTGCAAGAGCAGATTAAAACACATGCCACATCTTTGCCTAGAAAAATTATAGCAATGGCCGGGCGTGGTGGCTCAAGCCTGTAATCCCAGCACTTTGGGAGGCCGAGACGGGCGGATCACGAGGTCAGTAGATCGAGACCATCCTGGCTAACACGGTGAAACCCCGTCTCTA…	ATTATAGCAATGGCCGGGCGTGGTGGCTCAAGCCTGTAATCCCAGCACTTTGGGAGGCCGAGACGGGCGGATCACGAGGTCAGTAGATCGAGACCATCCTGGCTAACACGGTGAAACCCCGTCTCTACTAAAAAATACAAAAAACTAGCCGGGCGAGGTGGCGGGCGCTTGTAGTCCCAGCTACTTGGGAGGCTGAGGCAGGAGAATGGCGTAAACCCGGGAGGCGGAGCTTGCAGTGAGCTGAGGTCCGGCCACTGCACTCCAGCCTGGGTGACAGAGCGAGACTCCGTCTCAAAAAAAAAAAAAAAAAAAAAAAAAAGAAAAATTATAGCAATGTATCATGATAATTTTCAAAATGTTTTCAAATAATGAATAAAATCCACTATGACATTGCATTCT	ATTATAGCAATGGCCGGGCGTGGTGGCTCAAGCCTGTAATCCCAGCACTTTGGGAGGCCGAGACGGGCGGATCACGAGGTCAGTAGATCGAGACCATCCTGGCTAACACGGTGAAACCCCGTCTCTACTAAAAAATACAAAAAACTAGCCGGGCGAGGTGGCGGGCGCTTGTAGTCCCAGCTACTTGGGAGGCTGAGGCAGGAGAATGGCGTAAACCCGGGAGGCGGAGCTTGCAGTGAGCTGAGGTCCGGCCACTGCACTCCAGCCTGGGTGACAGAGCGAGACTCCGTCTCAAAAAAAAAAAAAAAAAAAAAAAAAAGAAAAATTATAGCAATGTATCATGATAATTTTCAAAATGTTTTCAAATAATGAATAAAATCCACTATGACATTGCATTCT
95ffa4ca-a892-4ad3-9899-536f667cccb2	Chr1	85461593	85461580	ALU	Alu_YRa4	0	269	+	+	N	AAGAAAACCTTTCT	Hippocampus.Single.WGS.ON22213.Neuron-#25|15,Hippocampus.Single.WGS.ON22213.Neuron-#52|2,Hippocampus.Single.WGS.ON22213.Neuron-#49|18,Liver.Bulk.WGS.ON22213|29,Hippocampus.Single.RC-seq.ON22213.Neuron-#25|9,Hippocampus.Single.RC-seq.ON22213.Neuron-#39|4	Hippocampus.Single.WGS.ON22213.Neuron-#15|4,Hippocampus.Single.WGS.ON22213.Neuron-#23|5,Hippocampus.Single.WGS.ON22213.Neuron-#25|8,Hippocampus.Single.WGS.ON22213.Neuron-#39|1,Hippocampus.Single.WGS.ON22213.Neuron-#49|12,Liver.Bulk.WGS.ON22213|11,Hippocampus.Single.RC-seq.ON22213.Neuron-#23|1,Hippocampus.Single.RC-seq.ON22213.Neuron-#25|5,Hippocampus.Single.RC-seq.ON22213.Neuron-#31|1	TTATTTGAAAAGATTAACAAATTTGCCAAACCTAGACTTTCTGAGAAAAAGAGAGAGAAAATTCAAATAGCTAAAATCAGAAAGTAGTAACATTACTATTGACCTTAGAGAAATAAGAAGGATTGTAGCAGAATGCTATGAAGAATTGTATACTAACAAATTAGATAATCTCGGTGAAATGGACACATTTCTAGAAACACAAAAACTACCATAACGGCCTCAGGAAGAAATAGGAAATCTGCACTGACTTATAATGGGTGAAGAGCTTGAGCCCATAAGAAAACCTTTCTGGCCGGGCGCGGTGGCTCAAGCCTGTAATCCCAGCACTTTGGGAGGCCGAGACGGGCGGATCATGAGGTCAGGAGATC	GCTGTGGCTTTTTAATGGCTTGAACCCGGTTGGGGGAGGTTGCTGTGGGCGGTTATCCGGCCACTGAACTCCTGCCTGGGCGCACGTGCTTGTATCCGTTTAAAAAAAAAAAAAAAAAAAAAAAAAAGAAAACCTTTCTAACAAAGAAAAGCTTAGGACCAAGTGGCTTCACTGGTCCTAAGGGAAGTGCTGGGTGCAGTGGCTCAAACCTGTAATGCCAGTGGCTTTGGGAGGCTAAGGTGGGAGGATTGCTTGAGGCCAGGAGTTTGAGAC	ATGGACACATTTCTAGAAACACAAAAACTACCATAACGGCCTCAGGAAGAAATAGGAAATCTGCACTGACTTATAATGGGTGAAGAGCTTGAGCCCATAAGAAAACCTTTCTGGCCGGGCGCGGTGGCTCAAGCCTGTAATCCCAGCACTTTGGGAGGCCGAGACGGGCGGATCATGAGGTCAGGAGATCGAGACCATACTGGCTAACACAGTGAAACCCCGTCTCTATACTA	ATGGACACATTTCTAGAAACACAAAAACTACCATAACGGCCTCAGGAAGAAATAGGAAATCTGCACTGACTTATAATGGGTGAAGAGCTTGAGCCCATAAGAAAACCTTTCTGGCCGGGCGCGGTGGCTCAAGCCTGTAATCCCAGCACTTTGGGAGGCCGAGACGGGCGGATCATGAGGTCAGGAGATCGAGACCATACTGGCTAACACAGTGAAACCCCGTCTCTATACTA
eafd5ca6-1bdb-43ff-a08d-0047ec850418	Chr1	86058814	86058822	ALU	Alu_YRa4	0	270	-	-	N	AAAATTCTT	Hippocampus.Single.WGS.ON22212.Neuron-#16|1,Hippocampus.Single.WGS.ON22212.Neuron-#17|7,Hippocampus.Single.WGS.ON22212.Neuron-#19|1,Hippocampus.Single.WGS.ON22212.Neuron-#21|7,Liver.Bulk.WGS.ON22212|7,Hippocampus.Single.RC-seq.ON22212.Neuron-#17|1	Hippocampus.Single.WGS.ON22212.Neuron-#17|5,Hippocampus.Single.WGS.ON22212.Neuron-#21|4,Hippocampus.Single.WGS.ON22212.Neuron-#37|1,Liver.Bulk.WGS.ON22212|16	ACGGGGTTTCACCGTGTTAGCCAGGATGGTCTCGATCTCCTGACCTAGTGATCTGCCCGTCTCGGCCTCCCAAAGTGCTGGGATTACAGGCTTGAGCCACCGCGCCCGGCCAAAAATTCTTAAGCTCACTGCATCCTTTCAAGTCTCCAACGGAATGCTAAGTTTCCTCCCTGTCATGAGAGACACGAAGTGAACTTAGTAGGTTGGGAGATGGAAGCTGGATGGCCCTCGGGGGTTGAACTGCAGGGTGTGGGACTTTG	GGATGAAAGGGATAGCCAACTGGACTAAAGTACGAGTGCCACTTCAGTTATTCAGCAGAGTGCCTAGTAAATGTCCACCACAATACCACCACACATCCGCTCAGGGATGAACAAGGGCTGACTGACTGATAAGCTCTTGAAAATTCTTTTTTTTTTTTTTTGAGACGGAGTCTCGCTTGTCGCCCAGGCTGGGGTGCAGTGGCCGGATCTCAGCTCACTGCAAGCTCCGCCTC	CCGAGGGCCATCCAGCTTCCATCTCCCAACACTAAGTTCACTTCGTGTCTCTCATGACAGGGAGGAAACTTAGCATTCCTTGGAGACTTGAAAGGATGCAGTGAGCTTAAGAATTTTTGGCCGGGCGCGGTGGCTCAAGCCTGTAATCCCAGCACTTTGGGAGGCCGAGACGGGCAGATCACTAGGTCAGGAGATCGAGACCATCCTGGCTAACACGGTGAAACCCCGTCTCTACTAAGAAATAAAAAAAAAAAAAAAAGAATTTTCAAGAGCTTATCAGTCAGTCAGCCCTTGTTCATCCCTGAGCGGATGTGTGGTGGTATTGTGGTGGACATTTTCTAGGCACTCTGCTGAA	CCGAGGGCCATCCAGCTTCCATCTCCCAACACTAAGTTCACTTCGTGTCTCTCATGACAGGGAGGAAACTTAGCATTCCTTGGAGACTTGAAAGGATGCAGTGAGCTTAAGAATTTTTGGCCGGGCGCGGTGGCTCAAGCCTGTAATCCCAGCACTTTGGGAGGCCGAGACGGGCAGATCACTAGGTCAGGAGATCGAGACCATCCTGGCTAACACGGTGAAACCCCGTCTCTACTAAGAAATAAAAAAAAAAAAAAAAGAATTTTCAAGAGCTTATCAGTCAGTCAGCCCTTGTTCATCCCTGAGCGGATGTGTGGTGGTATTGTGGTGGACATTTTCTAGGCACTCTGCTGAA
70fcfe5b-9c2e-45b4-bcbf-377d5131558f	Chr1	89166480	89166462	ALU	Alu_YRa4	1	269	+	+	N	ATAATAATAATTAATTTGG	Hippocampus.Single.WGS.ON22213.Neuron-#15|16,Hippocampus.Single.WGS.ON22213.Neuron-#23|2,Hippocampus.Single.WGS.ON22213.Neuron-#25|2,Hippocampus.Single.WGS.ON22213.Neuron-#31|10,Hippocampus.Single.WGS.ON22213.Neuron-#39|1,Hippocampus.Single.WGS.ON22213.Neuron-#49|1,Liver.Bulk.WGS.ON22213|14,Hippocampus.Single.RC-seq.ON22213.Neuron-#15|3,Hippocampus.Single.RC-seq.ON22213.Neuron-#31|5	Hippocampus.Single.WGS.ON22213.Neuron-#15|23,Hippocampus.Single.WGS.ON22213.Neuron-#23|3,Hippocampus.Single.WGS.ON22213.Neuron-#25|3,Hippocampus.Single.WGS.ON22213.Neuron-#31|2,Liver.Bulk.WGS.ON22213|14,Hippocampus.Single.RC-seq.ON22213.Neuron-#15|5	GTCTCAAGTATCCCCATGTGTTTTAGAAACCTGAAGTCAGTGAGATAAAATCCAACATTAAGAATTTAAAGGAAAGTAACCTGTGGGGAAAGAATGTAAAGAAAATACTGGGTAGTCTGGCTAGAGCATAATAATAATTAATTTGGGTGCCGGGCGCGGTGGCTCAAGCCTGTAATCCCAGCACTTTGGGAGGCCGAGACGGGTGGATCACGAGGTCAGGAGATCGAGACCATCCTGGTGAACACAGTGAAACCCCGTCTCTACTA	TGAACCGGGCAGGTAGAGGTTGCAGTGAGCCGAGATCACGTCACTGCACTCTAGCCTGGGCAACAGAGCAAGACTCCATCTCAAAAAAAAAAAAAAAAAAAAAAAATAATAATAATAATAATAATTAATTTGGTTTTCTGGTTTTCAAAATTTTGGATTGTAATAAGAGGAGATTTCAATATGCTATTTCAATTTTTAGTAGCAAATAAACGTGTATTTAGAGAAAAACATAAAAATGATGTATTTGAGTTCCCTCCCCCCGCCCA	AACCTGAAGTCAGTGAGATAAAATCCAACATTAAGAATTTAAAGGAAAGTAACCTGTGGGGAAAGAATGTAAAGAAAATACTGGGTAGTCTGGCTAGAGCATAATAATAATTAATTTGGGTGCCGGGCGCGGTGGCTCAAGCCTGTAATCCCAGCACTTTGGGAGGCCGAGACGGGTGGATCACGAGGTCAGGAGATCGAGACCATCCTGGTGAACACAGTGAAACCCCGTCTCTACTAAAACTACAAAAAACTAGCCGGGCGAGGTGGCGGGCGCCTGTAGTCCCAGCTACTCGGGAGGCTGAGGCAGGAGAATGGCGTGAACCCGGGAGGTGGAGCTTGCAGTGAGCTGAGATCAGGCCACTGCACTCCAGCCTGGGCGACAGAGCGAGACTCCGTC…	AACCTGAAGTCAGTGAGATAAAATCCAACATTAAGAATTTAAAGGAAAGTAACCTGTGGGGAAAGAATGTAAAGAAAATACTGGGTAGTCTGGCTAGAGCATAATAATAATTAATTTGGGTGCCGGGCGCGGTGGCTCAAGCCTGTAATCCCAGCACTTTGGGAGGCCGAGACGGGTGGATCACGAGGTCAGGAGATCGAGACCATCCTGGTGAACACAGTGAAACCCCGTCTCTACTAAAACTACAAAAAACTAGCCGGGCGAGGTGGCGGGCGCCTGTAGTCCCAGCTACTCGGGAGGCTGAGGCAGGAGAATGGCGTGAACCCGGGAGGTGGAGCTTGCAGTGAGCTGAGATCAGGCCACTGCACTCCAGCCTGGGCGACAGAGCGAGACTCCGTC…
a545c6c2-9408-4583-93d9-38dcb727e19e	Chr1	89404732	89404745	ALU	Alu_YRa4	0	270	-	-	N	TTCAACTGATTTTT	Hippocampus.Single.WGS.ON22212.Neuron-#19|30,Hippocampus.Single.WGS.ON22212.Neuron-#21|3,Hippocampus.Single.WGS.ON22212.Neuron-#7|19,Liver.Bulk.WGS.ON22212|12,Hippocampus.Single.RC-seq.ON22212.Neuron-#19|8,Hippocampus.Single.RC-seq.ON22212.Neuron-#7|5	Hippocampus.Single.WGS.ON22212.Neuron-#19|37,Hippocampus.Single.WGS.ON22212.Neuron-#21|7,Hippocampus.Single.WGS.ON22212.Neuron-#7|10,Hippocampus.Single.WGS.ON22213.Neuron-#23|1,Liver.Bulk.WGS.ON22212|14,Hippocampus.Single.RC-seq.ON22212.Neuron-#19|4,Hippocampus.Single.RC-seq.ON22212.Neuron-#7|1	GAGATGGGGTTTCACTGTGTTAGCCAGGATGGTCTCGATCTCCTGACCTTGTGATCCGCCCGTCTCGGCCTCCCACAGTGCTGGGATTACAGGCTTGAGCCACCGCGCCCGGCCCATTCAACTGATTTTTTAATTGAAACTAAATTTGAAAATGCAGTTTCTTAGAGAAACTAGCCAAGTTCAAGTGCTCAGTAGTGCGTGGCTACCGAATGAACCTCGCAAGACACAAGAGCCCCTTTCTGAAGCCAAGACTTCATCGCCCCCA	CGTATTTAGATTTCATAAAATTTACAATTGAAAAAGTAGATTCAATAGCCAAGTTGTTTCAAATGCACTGAAACCTTCTCCAATGCTTATTAAGTATCCATTTAAAAATTTCCACTCATTTATTAATTTTATTTCAACTGATTTTTTATTTTTTTTGTTTATTTTTTTTTTTTTTTTAATTTTTTATTTTTTTTTGAGACGGAGTCTCGCTCTGTCGCCACAGGCTGGAGTGCAGTGGCCAGCTGAG	TTCAAATTTAGTTTCAATTAAAAAATCAGTTGAATGGGCCGGGCGCGGTGGCTCAAGCCTGTAATCCCAGCACTTTGGGAGGCCGAGACGGGCGGATCACAAGGTCAGGAGATCGAGACCATCCTGGCTAACACAGTGAAACCCCATCTCTACTAAAAAATACAAAAAACTAGCCGGGCGAGCTGGCGGGCGCCTGTGGTCCCAGCTACTCGGGAGGCTGAGGCAGGAGAATGGCGTGAACCCGGGAGGCGGAGCTTGCAGTGAGCTGAGATCAGGCCACTGCACTCCAGCCTGGGCGACAGAGCGAGACTCCGTCTCAAAAAAAAATAAAAAATAAAAAAAAAAAAAAAATAAAAAAAAAAGAATAAACCAGTCATGAAATAAAATTAATAAATGAGT…	TTCAAATTTAGTTTCAATTAAAAAATCAGTTGAATGGGCCGGGCGCGGTGGCTCAAGCCTGTAATCCCAGCACTTTGGGAGGCCGAGACGGGCGGATCACAAGGTCAGGAGATCGAGACCATCCTGGCTAACACAGTGAAACCCCATCTCTACTAAAAAATACAAAAAACTAGCCGGGCGAGCTGGCGGGCGCCTGTGGTCCCAGCTACTCGGGAGGCTGAGGCAGGAGAATGGCGTGAACCCGGGAGGCGGAGCTTGCAGTGAGCTGAGATCAGGCCACTGCACTCCAGCCTGGGCGACAGAGCGAGACTCCGTCTCAAAAAAAAATAAAAAATAAAAAAAAAAAAAAAATAAAAAAAAAAGAATAAACCAGTCATGAAATAAAATTAATAAATGAGT…
b14138db-cf12-43a2-8ccb-4e3e9b224d74	Chr1	91674673	91674685	ALU	Alu_YRa4	0	270	+	+	N	AAAGATCACTATC	Hippocampus.Single.WGS.ON22212.Neuron-#7|4,Liver.Bulk.WGS.ON22212|9	Hippocampus.Single.WGS.ON22212.Neuron-#7|1,Liver.Bulk.WGS.ON22212|17,Hippocampus.Single.RC-seq.ON22212.Neuron-#7|2	GGCAGAGGGATTCTCCTTTCCTTGGGGAAAATAAATATACACAGCTCTTGAAATCTGCAGTTTAAGAGACTGTATTATTCCCCCGGGCCAATTCTCAGGCCAAATGAGCCAATGCCCCCAGCCTCAAGGAACACAGCAACAATTTGAGGCTCTCTTTGATATTACAGAGAACTGGATTTTCCTCATTTTGTGTATTTTTGCTTCCCTTGTAAATGCCTCTTGAATGCAAGGTTTGTTCACCTGCTTGCTCTGAGTAGACTCAGTCCTTTCATGCCTTTTAAAGATCACTATCGGGCCGGGCGCGGTGGCTCAAGCCTGTAATCCCAGCACTTTGGGAGGCCGAGACGGGCGGATCACGAGGTTAGGAGATCGAGACCATCCTGGCTAACACGGTGAAAC…	GGCAGAGGGATTCTCCTTTCCTTGGGGAAAATAAATATACACAGCTCTTGAAATCTGCAGTTTAAGAGACTGTATTATTCCCCCGGGCCAATTCTCAGGCCAAATGAGCCAATGCCCCCAGCCTCAAGGAACACAGCAACAATTTGAGGCTCTCTTTGATATTACAGAGAACTGGATTTTCCTCATTTTGTGTATTTTTGCTTCCCTTGTAAATGCCTCTTGAATGCAAGGTTTGTTCACCTGCTTGCTCTGAGTAGACTCAGTCCTTTCATGCCTTTTAAAGATCACTATCGGGCCGGGCGCGGTGGCTCAAGCCTGTAATCCCAGCACTTTGGGAGGCCGAGACGGGCGGATCACGAGGTTAGGAGATCGAGACCATCCTGGCTAACACGGTGAAAC…	TCCTCATTTTGTGTATTTTTGCTTCCCTTGTAAATGCCTCTTGAATGCAAGGTTTGTTCACCTGCTTGCTCTGAGTAGACTCAGTCCTTTCATGCCTTTTAAAGATCACTATCGGGCCGGGCGCGGTGGCTCAAGCCTGTAATCCCAGCACTTTGGGAGGCCGAGACGGGCGGATCACGAGGTTAGGAGATCGAGACCATCCTGGCTAACACGGTGAAACCCCGTCTCTACTAAAAAATACAAAAAAAAAAACTAGCCGGGCGAGGTGGCGGCGCCTGTAGTCCCAGCTACTCGGGAG	ATCCCAGCACTTTGGGAGGCCGAGACGGGCGGATCACGAGGTTAGGAGATCGAGACCATCCTGGCTAACACGGTGAAACCCCGTCTCTACTAAAAAATACAAAAAAAAAAACTAGCCGGGCGAGGTGGCGGCGCCTGTAGTCCCAGCTACTCGGGAGGCTGAGGCAGGAGAATGGCGGGAACCCGGGAGGCGGAGCTTGCAGTGAGCTGAGATCCGGCCACCGCACTCCAGCCTGGGCGGCAGAGCAAGACTCCGTCTCAAAAAAAAAAAAAAAAAAGATAAACACTATCTGGAAAGTGCTTCCTTCTCCTTTCTATTGCCAAGGTCAGAAACAGTGAGTGCCATTAG
69e5533d-d7b3-4114-b595-4012ea4278a4	Chr1	93213471	93213458	ALU	Alu_YRb4	0	258	+	+	N	GAGAAACAGGCCCT	Hippocampus.Single.WGS.ON22212.Neuron-#10|3,Hippocampus.Single.WGS.ON22212.Neuron-#7|1,Liver.Bulk.WGS.ON22212|13	Hippocampus.Single.WGS.ON22212.Neuron-#10|1,Liver.Bulk.WGS.ON22212|14	CTTTTATTACATGACCCTTTAGGGGTCATGAGGGTGGAACTCTTACGAAAGGGATTAGTGTCCTTGTAAAAGAGGCTTGAGGGAGCTTTTTTGCCCCTTCCATCATGTGAAGACACATAGAAGTCACCATCTATGAGAAACAGGCCCTTGGCCGGGCGCGGTGGCTCACGACCCCTGTAATCCCAGCACTTTGGGAGGCCGAGGCGGGCGGATCACAAGGTCAGGAGATCGAGACCACGGTGAAACCCCGTCTCTACTAAAAATACAAAAAA	AACCCGGGTGGGGGCGCTTGCAGTGTGCCGTTATCGCGCCACTGCACTCCAGCCTGGGCTACAGAGCGATACTCCGTCAAAAAAAAAAAAAAAAAAAAAAAAAAAAAGAGAAACAGGCCCTCATCAGACACTGAATCTACTGGTGCCTTGATCTTAAACCTCCCAGCCTCTTGAACTATGAGTGATAAACTTATGTTGTTTATAAATTACTCAGTCTAAGGTATTCTTTTGAGTAGCCTCAATGGACTAAGACA	TCTTACGAAAGGGATTAGTGTCCTTGTAAAAGAGGCTTGAGGGAGCTTTTTTGCCCCTTCCATCATGTGAAGACACATAGAAGTCACCATCTATGAGAAACAGGCCCTTGGCCGGGCGCGGTGGCTCACGCCTGTAATCCCAGCACTTTGGGAGGCCGAGGCGGGCGGATCACAAGGTCAGGAGATCGAGACCACGGTGAAACCCCGTCTCTACTAAAAATACAAAAAAAATTAATTGCCGGGCGCGGTTGTGGGCGCCTGTAGTCCCAGCTACTCGGGAGGCTGAGGCAGGAGAATGGCGTGAACCCTCTCGGCTC	TCTTACGAAAGGGATTAGTGTCCTTGTAAAAGAGGCTTGAGGGAGCTTTTTTGCCCCTTCCATCATGTGAAGACACATAGAAGTCACCATCTATGAGAAACAGGCCCTTGGCCGGGCGCGGTGGCTCACGCCTGTAATCCCAGCACTTTGGGAGGCCGAGGCGGGCGGATCACAAGGTCAGGAGATCGAGACCACGGTGAAACCCCGTCTCTACTAAAAATACAAAAAAAATTAATTGCCGGGCGCGGTTGTGGGCGCCTGTAGTCCCAGCTACTCGGGAGGCTGAGGCAGGAGAATGGCGTGAACCCTCTCGGCTC
19eb3037-03d1-454e-b33b-bb21129f99ee	Chr1	93643097	93643083	ALU	Alu_YRa4	0	270	-	-	N	GGTAAGACTTTTTTT	Hippocampus.Single.WGS.ON22212.Neuron-#21|1,Hippocampus.Single.WGS.ON22212.Neuron-#7|2,Hippocampus.Single.WGS.ON22213.Neuron-#39|2,Liver.Bulk.WGS.ON22212|14,Liver.Bulk.WGS.ON22213|11,Hippocampus.Single.RC-seq.ON22212.Neuron-#21|1,Hippocampus.Single.RC-seq.ON22212.Neuron-#7|2	Hippocampus.Single.WGS.ON22212.Neuron-#19|1,Hippocampus.Single.WGS.ON22212.Neuron-#21|1,Hippocampus.Single.WGS.ON22212.Neuron-#7|4,Liver.Bulk.WGS.ON22212|20,Liver.Bulk.WGS.ON22213|15,Hippocampus.Single.RC-seq.ON22212.Neuron-#7|1	CATGGTACTACTGGTTTTGCTTTATTACACTTGGTCAAATCATTTGTACACAGTGCAGCAAGAATAATTTTTTACATAAGCTTTTAAATTGGTGTTGATGGAATTTTGTTCCATAGTAGGAGTCTCGGGTAAGACTTTTTTTTTTTTTTTTTTTTTTTTTTTTTGTGAGACGGAGTCTTGCTAGGTCACCCCGAGGCTGGTGTGAAGTGGCCGGAACGAAGCGCACGGCCAACTC	TTTTTTTTTTTTTTTTTTTTTTTTTTTTTGAGACGGAGTCTTGCTCTGTCACCCAGGCTGGAGTGAAGTGGCCGGATCTCAGCTCACTGCAAGCTCCGCCTCCCGGGTTTACGCCGTTCTCCTGCCTCAGCCTCCCGAGTAGCTGGGACTACAGGCGCCCGCCACCTCGCCCGGCTAGTTTTTTTGTATTTTTTAGTAGAGACGGGGTTTCACCGTGTTAGCCGGGATCGTCTCTCGATCTCCTGGCCTCGTGATCCGCCCGTCTCGGCCTCCCAAAGTGCTGGGATTACAGGCTTGAGCCACCGCACCCGGCCGGTAAGACTTTTTTTAAAGCTGAGCCCAACCATGGATTTGTGCCATGAAATATCCATGGGTTTGGTGAATTTCCTCTCCTCTTGA…	CACCAACCCCATGGATATTTCATGGCACAAATCCATGGTTGGGCTCAGCTTTAAAAAAAGTCTTACTGGCCGGGTGCGGTGGCTCAAGCCTGTAATCCCAGCACTTTGGGAGGCCGAGACGGGCGGATCACGAGGCCAGGAGATCGAGAGACGATCCCGGCTAACACGGTGAAACCCCGTCTCTACTAAAAAATACAAAAAAACTAGCCGGGCGAGGTGGCGGCCGCCTGTAGTCCCAGCTACTCGGGAGGCTGAGGCAGGAGAACGGCGTAAACCCGGGAGGCGGAGCTTGCAGTGAGCTGAGATCCGGCCACTTCACTCCAGCCTGGGTGACAGAGCAAGACTCCGTCTCAAAAAAAAAAA	CACCAACCCCATGGATATTTCATGGCACAAATCCATGGTTGGGCTCAGCTTTAAAAAAAGTCTTACTGGCCGGGTGCGGTGGCTCAAGCCTGTAATCCCAGCACTTTGGGAGGCCGAGACGGGCGGATCACGAGGCCAGGAGATCGAGAGACGATCCCGGCTAACACGGTGAAACCCCGTCTCTACTAAAAAATACAAAAAAACTAGCCGGGCGAGGTGGCGGCCGCCTGTAGTCCCAGCTACTCGGGAGGCTGAGGCAGGAGAACGGCGTAAACCCGGGAGGCGGAGCTTGCAGTGAGCTGAGATCCGGCCACTTCACTCCAGCCTGGGTGACAGAGCAAGACTCCGTCTCAAAAAAAAAAA
5cc1ab29-0130-4852-920d-3e494f317a2e	Chr1	94209438	94209452	ALU	Alu_YRa4	0	269	-	-	N	TCTCTTCTTCATTTT	Hippocampus.Single.WGS.ON22212.Neuron-#10|37,Hippocampus.Single.WGS.ON22212.Neuron-#16|3,Hippocampus.Single.WGS.ON22212.Neuron-#19|11,Liver.Bulk.WGS.ON22212|19,Hippocampus.Single.RC-seq.ON22212.Neuron-#10|6,Hippocampus.Single.RC-seq.ON22212.Neuron-#16|1,Hippocampus.Single.RC-seq.ON22212.Neuron-#19|3	Hippocampus.Single.WGS.ON22212.Neuron-#10|29,Hippocampus.Single.WGS.ON22212.Neuron-#16|3,Hippocampus.Single.WGS.ON22212.Neuron-#19|8,Liver.Bulk.WGS.ON22212|13,Hippocampus.Single.RC-seq.ON22212.Neuron-#10|6,Hippocampus.Single.RC-seq.ON22212.Neuron-#16|1,Hippocampus.Single.RC-seq.ON22212.Neuron-#19|2	TTTAGTAGAGACGGGGTTTCACCGTGTTAGCCAGGATGGTCTCGATCTCCTGACCTCATGATCCGCCCGTCTCGGCCTCCCAAAGTGCTGGGATTACAGGCTTGAGCCACCGCGCCCGGCCTCTCTTCTTCATTTTACAGAGGGTGTAACTTGGGCCAAGAAGTCGTGATATGAGCAGGTCATACAGGTGTGTTGAGGGCCAAACCCCTCGACTCCCTTGGGAGTTAAAGGGAAGGAAGTGGACATTTCCTTTGAACCTATGAATGAGCA	CCATACTCTCAACCACTCTGTCTCCACATAGAATGCACAAAGGCAGGGCTGCTCTGTTATTTTGGGTGGCGTGGGTGGAAGTAGGCAATGGAGGCACAGTTTTCAAAGCCACTGGTCTAATCTAACCATTCTTCTCTTCTTCATTTTTTTTTTTTTTTTTTTTTTTTTTTTTTTTTTTTTTTTGTGACGCGGTGGGTATTGGATGTGCCCAAGGGAGGTGTGGGGGGGGG	CCCAAGTTACACCCTCTGTAAAATGAAGAAGAGAGGCCGGGCGCGGTGGCTCAAGCCTGTAATCCCAGCACTTTGGGAGGCCGAGACGGGCGGATCATGAGGTCAGGAGATCGAGACCATCCTGGCTAACACGGTGAAACCCCGTCTCTACTAAAAATACAAGAAAATTAGCCGGGCGAGGTGGCGGGCGCCTGTAGTCCCAGCTACTCGGGAGGCTGAGGCAGGAGAATAGCGTGAACCCGGGGGAGAGGAGCTTGCAGTGAGCTGAGATCGCGCCACTGCACTCCAGCCTGGGGCACAGAGCAAGACTCCGCGTTCAAAAAAAAAAAAAAAAAAAAAAAAAAAAAAAAAAATAAAAATGAAGAAGGAAGAAAGGTTAGATTAGACCAGTGG	CCCAAGTTACACCCTCTGTAAAATGAAGAAGAGAGGCCGGGCGCGGTGGCTCAAGCCTGTAATCCCAGCACTTTGGGAGGCCGAGACGGGCGGATCATGAGGTCAGGAGATCGAGACCATCCTGGCTAACACGGTGAAACCCCGTCTCTACTAAAAATACAAGAAAATTAGCCGGGCGAGGTGGCGGGCGCCTGTAGTCCCAGCTACTCGGGAGGCTGAGGCAGGAGAATAGCGTGAACCCGGGGGAGAGGAGCTTGCAGTGAGCTGAGATCGCGCCACTGCACTCCAGCCTGGGGCACAGAGCAAGACTCCGCGTTCAAAAAAAAAAAAAAAAAAAAAAAAAAAAAAAAAAATAAAAATGAAGAAGGAAGAAAGGTTAGATTAGACCAGTGG
25207b2c-cd05-4883-920d-0441bb46c876	Chr1	95510437	95510422	ALU	Alu_YRa4	0	269	+	+	N	AAAAATTATATTTGTC	Hippocampus.Single.WGS.ON22212.Neuron-#16|5,Hippocampus.Single.WGS.ON22212.Neuron-#17|10,Hippocampus.Single.WGS.ON22212.Neuron-#19|1,Hippocampus.Single.WGS.ON22213.Neuron-#69|11,Hippocampus.Single.WGS.ON22213.Neuron-#71|6,Hippocampus.Single.WGS.ON22213.Neuron-#31|1,Liver.Bulk.WGS.ON22212|29,Liver.Bulk.WGS.ON22213|12,Hippocampus.Single.RC-seq.ON22212.Neuron-#16|4,Hippocampus.Single.RC-seq.ON22212.…	Hippocampus.Single.WGS.ON22212.Neuron-#16|4,Hippocampus.Single.WGS.ON22212.Neuron-#17|11,Hippocampus.Single.WGS.ON22212.Neuron-#19|1,Hippocampus.Single.WGS.ON22213.Neuron-#69|9,Hippocampus.Single.WGS.ON22213.Neuron-#71|1,Hippocampus.Single.WGS.ON22213.Neuron-#31|1,Liver.Bulk.WGS.ON22212|42,Liver.Bulk.WGS.ON22213|20,Hippocampus.Single.RC-seq.ON22212.Neuron-#16|5,Hippocampus.Single.RC-seq.ON22212.N…	AAGGCAGGGGAGTTTGGTAATCTTTCTAAGCTGTTTGTTGATTATAACGGTTAGGGCAATTATGAAGGTTAGGAATTACGAAACGTGGAAATTCTCCTAAGCATAGTTGGTATGCATAGTTGGTAACTCTTAAAAATTATATTTGTCGGCCGGGCGCGGTGGCTCAAGCCTGTAATCCCAGCACTTTGGGAGGCCGAGACGGGCGGATCACGAGGTCAGGAGATCGAGACCATCCTGGCTAACACTGGGTAAACCCCGTCTCTACTAAA	ACTGAGGAAGGAGAATGGCATAAACCGGGGAGGGGGAGCTTGCAGGGAGCGGAGATCCGGCCCTTGTACTCCAACCTGGGCGGCAGAGCAAGACCCCGTCTAAAAAAAAAAAAAAAAAAAAAAAAATTATATTTGTCTCAACCTTGATAACTAAAATTACCTAAGATTAAAATTTGAAAAATTAAATTAAGATAAATTTTCATTTATCTTAAATTTAAGATAATTTAAGTTTTTATCTTAATTTAATTATCAAATTTAATTAAGCTCT	TATAACGGTTAGGGCAATTATGAAGGTTAGGAATTACGAAACGTGGAAATTCTCCTAAGCATAGTTGGTATGCATAGTTGGTAACTCTTAAAAATTATATTTGTCGGCCGGGCACGGTGGCTCATGCCTGTAATCCCAGCACTTTGGGAGGCCGAGACGGGCGGATCACGAGGTCAGGAGATCGAGACCATCCTGGCTAACACGGTGAAACCCCGTCTCTACTAAAAATACAAAAAAAAAACTAGCCGGGCGAGGTGGCGGGCGCCTGTAATCCCAGCTACTCGGGAGACTGAGGCAGGAGAATGGCATAAACCTGGGAGGCGGAGCTTGCAGTGAGCTGAGATCCGGCCACTGTACTCCAACCTGGGCGGCAGAGCAAGACTCCGTCTCAAAAAAAAA…	TATAACGGTTAGGGCAATTATGAAGGTTAGGAATTACGAAACGTGGAAATTCTCCTAAGCATAGTTGGTATGCATAGTTGGTAACTCTTAAAAATTATATTTGTCGGCCGGGCACGGTGGCTCATGCCTGTAATCCCAGCACTTTGGGAGGCCGAGACGGGCGGATCACGAGGTCAGGAGATCGAGACCATCCTGGCTAACACGGTGAAACCCCGTCTCTACTAAAAATACAAAAAAAAAACTAGCCGGGCGAGGTGGCGGGCGCCTGTAATCCCAGCTACTCGGGAGACTGAGGCAGGAGAATGGCATAAACCTGGGAGGCGGAGCTTGCAGTGAGCTGAGATCCGGCCACTGTACTCCAACCTGGGCGGCAGAGCAAGACTCCGTCTCAAAAAAAAA…
29f8ab9b-6729-4f0e-96ca-78fc3e0e285f	Chr1	98958790	98958804	ALU	Alu_YRd4	0	269	-	-	N	GGGGCCTTTATTTTT	Hippocampus.Single.WGS.ON22212.Neuron-#10|2,Hippocampus.Single.WGS.ON22212.Neuron-#21|15,Liver.Bulk.WGS.ON22212|17,Hippocampus.Single.RC-seq.ON22212.Neuron-#21|2,Hippocampus.Single.RC-seq.ON22213.Neuron-#25|1,Hippocampus.Single.RC-seq.ON22213.Neuron-#38|1	Hippocampus.Single.WGS.ON22212.Neuron-#21|6,Liver.Bulk.WGS.ON22212|9,Hippocampus.Single.RC-seq.ON22212.Neuron-#16|1,Hippocampus.Single.RC-seq.ON22212.Neuron-#21|1	TAGTAGAGATGGGGTTTCACCATGTTAGCCAGGATAGTCTCGATCTCCTGACCTCGTGATCCACCCGCCTCGGCCTCCCAAAGTGCTGGGATTACAGGCTTGAGCCACCGCGCCCGGCCAAGGGGCCTTTATTTTTAAACACATGATTGACACCCCTCTCTCAGGGTTGGGTCAAATACAGGCCATCCTGCAGGCAGACAGAGGAATCATATGACTTATGAGGTCCCTGCCAGCACTATGATTTGTCTAGAGACCAGAAATATAATTATGT	CTTAGGTAAGCAAGGTTTTGCACATCAAGCAAGAGATTTTTTTTTTCTAACTCTGCCTCTGGGCAAGGAGAGCAGAGCATTGAAACCTCTGAATCAACTGTTGTCTCCACTTTTGTCACATGGCTAAATGGGGGCCTTTATTTTTTTTTTTTTTTTTTTTTTTTTTTTTTTTTTTTTTTTTTTTTTGGGGGGGTTTTATGTGGTTGTTTGGCCGGGGTGTGGGACTTG	AAAATAAAGGCCCCTTGGCCGGGCGCGGTGGCTCAAGCCTGTAATCCCAGCACTTTGGGAGGCCGAGGCGGGTGGATCACGAGGTCAGGAGATCGAGACTATCCTGGCTAACATGGTGAAACCCCATCTCTACTAAAAATACAAAAAACTAGCCGGGCGTGGTGGCGGGCGCCTGTAGTCTCAGCTACTTGGGAGGCTGAGGCAGGAGAATGGCGTGAACCCGGGAGGCGGAGCTTGCAGTGAGCCGAGATCACGCCACTGCACTCCAGCCTGGGAGACACAGCGAGACTCCGTCTCAAAAAAAAAAAAAAAAAAAAAAAAAAAAAAAAAAAAAAAAAAAAATAAAGGCCCCCATTTAGCC	AAAATAAAGGCCCCTTGGCCGGGCGCGGTGGCTCAAGCCTGTAATCCCAGCACTTTGGGAGGCCGAGGCGGGTGGATCACGAGGTCAGGAGATCGAGACTATCCTGGCTAACATGGTGAAACCCCATCTCTACTAAAAATACAAAAAACTAGCCGGGCGTGGTGGCGGGCGCCTGTAGTCTCAGCTACTTGGGAGGCTGAGGCAGGAGAATGGCGTGAACCCGGGAGGCGGAGCTTGCAGTGAGCCGAGATCACGCCACTGCACTCCAGCCTGGGAGACACAGCGAGACTCCGTCTCAAAAAAAAAAAAAAAAAAAAAAAAAAAAAAAAAAAAAAAAAAAAATAAAGGCCCCCATTTAGCC
0487b756-13a9-423c-a6c7-1349e749fcca	Chr1	99112013	99111999	ALU	Alu_YRa4	0	270	+	+	N	AAACAAAGACTAATT	Hippocampus.Single.WGS.ON22213.Neuron-#14|5,Hippocampus.Single.WGS.ON22213.Neuron-#69|4,Hippocampus.Single.WGS.ON22213.Neuron-#23|9,Hippocampus.Single.WGS.ON22213.Neuron-#39|1,Liver.Bulk.WGS.ON22212|22,Liver.Bulk.WGS.ON22213|10,Hippocampus.Single.RC-seq.ON22213.Neuron-#14|2,Hippocampus.Single.RC-seq.ON22213.Neuron-#71|2,Hippocampus.Single.RC-seq.ON22213.Neuron-#23|7	Hippocampus.Single.WGS.ON22212.Neuron-#16|1,Hippocampus.Single.WGS.ON22213.Neuron-#14|1,Hippocampus.Single.WGS.ON22213.Neuron-#69|5,Hippocampus.Single.WGS.ON22213.Neuron-#71|1,Hippocampus.Single.WGS.ON22213.Neuron-#23|6,Hippocampus.Single.WGS.ON22213.Neuron-#49|1,Liver.Bulk.WGS.ON22212|15,Liver.Bulk.WGS.ON22213|19,Hippocampus.Single.RC-seq.ON22213.Neuron-#14|2,Hippocampus.Single.RC-seq.ON22213.Ne…	TTAAACAGCAATGATTCTGTCTATAAATATTTCAGTGAGTACTTCTAAAAAACAAAGAACTCTACTTTTTAACCCCAAAACAATTATACAAAAAATCAACACGTTAACCAAGTTTTAAAAAATAAGCTACTACATCTATCTTAGATACTTCAGCATACAAGAAAAAGGCTCAACACTTGGTGATTGTGTCAATTAGGATAAGTCAGGAGACAGAAATCACACAGTAATTTGAACAGAGAAAGTTTAATGTAAACAAAGACTAATTTGGCCGGGCGCGGTGGCTCAAGCCTGTAATCCCAGCACTTTGGGAGGCCGAGACGGGCGGATCACAAGGTCAGGAGATCGAGACCATCCTGGCTAACACGGCGAAACCCCGTCTCTACTAAAAACACAAAAAAT…	CGGGTGGCTGTGGCAGGAGAATGGCGGGAACCCGGGAGGCGGAGCTTGCTGTGAGCTGAGATCTGGCCACTGCACTCCAGCCTGGGCGACAGAGCGAGACTCTGTCTCAAAAAAAAAAAAAAAACAAAGACTAATTAGCAACAGGAAATTAATAACTAAAGGATAAAAAGAACTCTAAAGAACATAGAAATAGTAGATACAGGAATAGAAAGTTAATACAAAAAGGCTTGAGGCCGAGTGCCACTGGAGATAGAAAAAATATGAACCAAA	CTCAACACTTGGTGATTGTGTCAATTAGGATAAGTCAGGAGACAGAAATCACACAGTAATTTGAACAGAGAAAGTTTAATGTAAACAAAGACTAATTTGGCCGGGCGCGGTGGCTCAAGCCTGTAATCCCAGCACTTTGGGAGGCCGAGACGGGCGGATCACAAGGTCAGGAGATCGAGACCATCCTGGCTAACACGGCGAAACCCCGTCTCTACTAAAAACACAAAAAATTAGCCGGGCGAGGTGGCGGCGCCTGTGGTCCCAGCTACTCGGGAGGCTGAGGCAGGAGAATGGCGGGAACCCGGGAGGCGGAGCTTGCAGTGAGCTGAGATCTGGCCACTGCACTCCAGCCTGGGCGACAGAGCGAGACTCTGTCTCAAAAAAAAAAAAAAAAAACAA…	CTCAACACTTGGTGATTGTGTCAATTAGGATAAGTCAGGAGACAGAAATCACACAGTAATTTGAACAGAGAAAGTTTAATGTAAACAAAGACTAATTTGGCCGGGCGCGGTGGCTCAAGCCTGTAATCCCAGCACTTTGGGAGGCCGAGACGGGCGGATCACAAGGTCAGGAGATCGAGACCATCCTGGCTAACACGGCGAAACCCCGTCTCTACTAAAAACACAAAAAATTAGCCGGGCGAGGTGGCGGCGCCTGTGGTCCCAGCTACTCGGGAGGCTGAGGCAGGAGAATGGCGGGAACCCGGGAGGCGGAGCTTGCAGTGAGCTGAGATCTGGCCACTGCACTCCAGCCTGGGCGACAGAGCGAGACTCTGTCTCAAAAAAAAAAAAAAAAAACAA…
e31cfb6d-f28e-4f86-810c-ad4f44687186	Chr1	99124401	99124411	ALU	Alu_YRa4	0	269	-	-	N	AACATTTTTTA	Hippocampus.Single.WGS.ON22212.Neuron-#16|10,Hippocampus.Single.WGS.ON22212.Neuron-#17|14,Hippocampus.Single.WGS.ON22212.Neuron-#19|52,Liver.Bulk.WGS.ON22212|22,Hippocampus.Single.RC-seq.ON22212.Neuron-#17|7,Hippocampus.Single.RC-seq.ON22212.Neuron-#19|16,Hippocampus.Single.RC-seq.ON22213.Neuron-#38|1	Hippocampus.Single.WGS.ON22212.Neuron-#16|5,Hippocampus.Single.WGS.ON22212.Neuron-#17|25,Hippocampus.Single.WGS.ON22212.Neuron-#19|56,Liver.Bulk.WGS.ON22212|22,Hippocampus.Single.RC-seq.ON22212.Neuron-#16|1,Hippocampus.Single.RC-seq.ON22212.Neuron-#17|3,Hippocampus.Single.RC-seq.ON22212.Neuron-#19|18	TTCGTTAATACACGTTTCTGATAACTTTAAGATCTTACCAGTGGAGTAAGTAAAAATTTCCAAAACTCAAATGAAAAAACTGATTTGAAACTGCTAATCAAGATCAAGCAAAATGAAAACTAATACATGAGATTAAATAACTGGTAAAGATGTTTTTATATGTTTTATTTGAAACATTGTTCGTTCTTTACTTAAATTTTTAAAAAATGTTGCCGGGCGCGGTGGCTCAAGCCTGTAATCCCAGCACTTTGGGAGGCCGAGACGGGCGGATCACGAGGTCAGGAGATCGAGACCATCCTGGCTGACACAGTGAAACCCCGTCTCTACTAAAAAATACAAAAAAACTTAGCCGGGCGCGGTGGCGGGCGCCTATAGTCCCAGCTACTCGGGAGGCTGAGG…	GGGCAACAAGAGTGAAATTCTATCTCAAAAAAAAAAAAAAAGTATACCTTGAAATTACTGCAAACTAAAGATAATTTATGAGAAAAAGACTTCTTAAATGTGGAAAACAAAACATTTAAGTATTTCATTCAATAAAAAATTTTTTATTTTTTATTTTTTATTTTTTTAATTTTTTATTTTTTTTTTTTTAGAGGACGGTC	GAAGGGAGGAGGTTATGGCAACCCCTAGCTTTGTTGCAAGGTTGAACAGAAGTGTAGGTACCCTGGGTACTCAATATTTGAGACTGGGCCGGGCGCGGTGGCTCACGCCTGTAATCCCAGCACTTTGGGAGGCCGAGGCGGGCGGATCACGAGGTCAGGAGATCGAGACCATCCTGGCTGACACAGTGAAACCCCGTCTCTACTAAAAAATACAAAAAAACTTAGCCGGGCGCGGTGGCGGGCGCCTATAGTCCCAGCTACTCGGGAGGCTGAGGCAGGAGAATGGCGTAAACCCGGGAGGCGGAGCTTGCAGTGAGCTGAGATCCGGCCACTGCACTCCAGCCTGGGCGACAGAGCGAGACTCCGTCTCAAAAAAAAAAAATAAAAAATAAAAAATAA…	GAAGGGAGGAGGTTATGGCAACCCCTAGCTTTGTTGCAAGGTTGAACAGAAGTGTAGGTACCCTGGGTACTCAATATTTGAGACTGGGCCGGGCGCGGTGGCTCACGCCTGTAATCCCAGCACTTTGGGAGGCCGAGGCGGGCGGATCACGAGGTCAGGAGATCGAGACCATCCTGGCTGACACAGTGAAACCCCGTCTCTACTAAAAAATACAAAAAAACTTAGCCGGGCGCGGTGGCGGGCGCCTATAGTCCCAGCTACTCGGGAGGCTGAGGCAGGAGAATGGCGTAAACCCGGGAGGCGGAGCTTGCAGTGAGCTGAGATCCGGCCACTGCACTCCAGCCTGGGCGACAGAGCGAGACTCCGTCTCAAAAAAAAAAAATAAAAAATAAAAAATAA…
33192449-e55b-4cff-9430-ddd1a7ebce50	Chr1	99297762	99297777	ALU	Alu_YRb4	0	257	-	-	N	CAAACAGGTTCTTTTC	Hippocampus.Single.WGS.ON22212.Neuron-#19|5,Hippocampus.Single.WGS.ON22212.Neuron-#21|2,Liver.Bulk.WGS.ON22212|17,Hippocampus.Single.RC-seq.ON22212.Neuron-#19|3,Hippocampus.Single.RC-seq.ON22212.Neuron-#21|4	Hippocampus.Single.WGS.ON22212.Neuron-#16|1,Hippocampus.Single.WGS.ON22212.Neuron-#19|7,Hippocampus.Single.WGS.ON22212.Neuron-#21|2,Liver.Bulk.WGS.ON22212|13,Hippocampus.Single.RC-seq.ON22212.Neuron-#19|3,Hippocampus.Single.RC-seq.ON22212.Neuron-#21|2,Hippocampus.Single.RC-seq.ON22213.Neuron-#52|1	CACTATTTCCCTACTCGTCGCTCTTGCGTTCTGCTGTTCTCGAACTCGTGACCTCAAGTGATCAGCCTGCCTCGGCCTCCCAAAGTGCTGGGATTACAGGCGTGAGCCACCGCGCCCGGCCCAAACAGGTTCTTTTCATACATTGCTGATGGGAGACAAAATTGGTAAAATTTCCAGGGAAGGCAATTTGGTAATACTAACTAAAATCATTTTCAAAAATTGCTGGTGGGATGAAAATTATAAAAATCTTTGTTGGGAGGAAGGGAAT	ATTGCCATGTAACTATATTAAAAGATGCTCAACTTTACTTATAAGAGCAATGAAATTTTATCTTGCAATGAGATAGCATTTACATGATCAGATTGTCAAAAATCAAGAAGTTTAACAGCACCAGTGTGCTATCAAACAGGTTCTTTTCTTTTTTTTTTTTTTTTTTTTTTTTTTTGATTGAGACGCGGCTTCTGGAAAGTTACCCCAGGGATGAGTGAATTTGGGCCTTAACAGCGAAAT	TATTACCAAATTGCCTTCCCTGGAAATTTTACCAATTTTGTCTCCCATCAGCAATGTATGAAAAGAACCTGTTTGGGCCGGGCGCGGTGGCTCACGCCTGTAATCCCAGCACTTTGGGAGGCCGAGGCGGGCGGATCACAAGGTCAGGAGATCAGAGACCACGGTGAAACCCCGTCTCTACTAAAAATACAAAAAATTAGCCGGGCGCGGTTGTGGGCGCCTATAGTCCCAGCTACTCGGGAGGCTGAGGCAGGAGAATGGCGTGAACCCGGGAGGCGGAGCTTGCAGTGAGCCGAGATCGCGCCACTGCACTCCAGCCTGGGCGACAGAGCCAGACTCCGTCTCAAAAAAAAAAAAAAAAAAAAAAAAAAAATAAAAGAACCTGTTTGATAGCACACT…	TATTACCAAATTGCCTTCCCTGGAAATTTTACCAATTTTGTCTCCCATCAGCAATGTATGAAAAGAACCTGTTTGGGCCGGGCGCGGTGGCTCACGCCTGTAATCCCAGCACTTTGGGAGGCCGAGGCGGGCGGATCACAAGGTCAGGAGATCAGAGACCACGGTGAAACCCCGTCTCTACTAAAAATACAAAAAATTAGCCGGGCGCGGTTGTGGGCGCCTATAGTCCCAGCTACTCGGGAGGCTGAGGCAGGAGAATGGCGTGAACCCGGGAGGCGGAGCTTGCAGTGAGCCGAGATCGCGCCACTGCACTCCAGCCTGGGCGACAGAGCCAGACTCCGTCTCAAAAAAAAAAAAAAAAAAAAAAAAAAAATAAAAGAACCTGTTTGATAGCACACT…
6f8c9e8d-faeb-46d0-a42c-ccf9e804f3b9	Chr1	99512097	99512084	ALU	Alu_YRa4	0	270	+	+	N	GAAAATAATATGAA	Hippocampus.Single.WGS.ON22212.Neuron-#7|1,Hippocampus.Single.WGS.ON22213.Neuron-#69|9,Hippocampus.Single.WGS.ON22213.Neuron-#31|6,Hippocampus.Single.WGS.ON22213.Neuron-#47|1,Hippocampus.Single.WGS.ON22213.Neuron-#49|1,Liver.Bulk.WGS.ON22212|10,Liver.Bulk.WGS.ON22213|8,Hippocampus.Single.RC-seq.ON22213.Neuron-#69|1,Hippocampus.Single.RC-seq.ON22213.Neuron-#23|2,Hippocampus.Single.RC-seq.ON22213.N…	Hippocampus.Single.WGS.ON22212.Neuron-#7|2,Hippocampus.Single.WGS.ON22213.Neuron-#69|11,Hippocampus.Single.WGS.ON22213.Neuron-#31|2,Liver.Bulk.WGS.ON22212|11,Liver.Bulk.WGS.ON22213|7,Hippocampus.Single.RC-seq.ON22213.Neuron-#69|2,Hippocampus.Single.RC-seq.ON22213.Neuron-#31|3,Hippocampus.Single.RC-seq.ON22213.Neuron-#47|1	CCATGTTATCCTACCTAACACAAGATGTTTGAGGGCAAGACCAAATTTGTATTGTTCACTGCCGTGTCCCTACCTGAATCCTTGGTCAAAGACACAGTGGCCTGCAGAGAGCAGGAACTTAATAAATATGTGCATTGAAAATAATATGAAGGCCGGGCGCGGTGGCTCAAGCCTGTAATCCCAGCACTTTGGGAGGCCGAGACGGGCGGATCACGAGGTCAGGAGATCGAGACCATCCTGGCTAACACAGTGAAACCCCGTCTCTACTAA	CAGGAGAATGGCGGGAACCCGGGAGGCGGAGCTTGCAGTGAGCCGAGATCTGGCCACTGCACTCCAGCCTGGGCGACAGAGCGAGACTCCGCCTCAAAAAAAAAAAAAAAAAAAGAAAATCATATGAATTTATTTACTTGCTGTTGAGATGGAGTCTTGCTCAGTCGCCCAGGCTGCAGTGCAGTGCCACAATCTCAGCTCGCTGCAACCTCCGCCTCCTCGGTTCAAGTGATCCTCCTGCCGTTCTCCGC	ACCAAATTTGTATTGTTCACTGCCGTGTCCCTACCTGAATCCTTGGTCAAAGACACAGTGGCCTGCAGAGAGCAGGAACTTAATAAATATGTGCATTGAAAATAATATGAAGGCCGGGCGCGGTGGCTCAAGCCTGTAATCCCAGCACTTTGGGAGGCCGAGACGGGCGGATCACGAGGTCAGGAGATCGAGACCATCCTGGCTAACACAGTGAAACCCCGTCTCTACTAAAAAATACAAAAAACTAGCCGGGCGAGGTGGCGGGCGCCTGTAGTCCCAGCTACTCGGGAGGCTGAGGCAGGAGAATGGCGGGAACCCGGGAGGCGGGGCGTGCCGTGAGCCGAGATATGGGCACAGCACACCCCGCAGGGGGGCCG	ACCAAATTTGTATTGTTCACTGCCGTGTCCCTACCTGAATCCTTGGTCAAAGACACAGTGGCCTGCAGAGAGCAGGAACTTAATAAATATGTGCATTGAAAATAATATGAAGGCCGGGCGCGGTGGCTCAAGCCTGTAATCCCAGCACTTTGGGAGGCCGAGACGGGCGGATCACGAGGTCAGGAGATCGAGACCATCCTGGCTAACACAGTGAAACCCCGTCTCTACTAAAAAATACAAAAAACTAGCCGGGCGAGGTGGCGGGCGCCTGTAGTCCCAGCTACTCGGGAGGCTGAGGCAGGAGAATGGCGGGAACCCGGGAGGCGGGGCGTGCCGTGAGCCGAGATATGGGCACAGCACACCCCGCAGGGGGGCCG
fde9ac05-7425-4623-834e-e9adf466d673	Chr1	99624340	99624332	ALU	Alu_YRa4	0	269	+	+	N	AAGATTCCA	Hippocampus.Single.WGS.ON22212.Neuron-#16|40,Hippocampus.Single.WGS.ON22212.Neuron-#7|4,Hippocampus.Single.WGS.ON22213.Neuron-#10|8,Hippocampus.Single.WGS.ON22213.Neuron-#14|19,Hippocampus.Single.WGS.ON22213.Neuron-#38|1,Hippocampus.Single.WGS.ON22213.Neuron-#39|1,Liver.Bulk.WGS.ON22212|12,Liver.Bulk.WGS.ON22213|19,Hippocampus.Single.RC-seq.ON22212.Neuron-#16|9,Hippocampus.Single.RC-seq.ON22212.N…	Hippocampus.Single.WGS.ON22212.Neuron-#16|4,Hippocampus.Single.WGS.ON22212.Neuron-#7|6,Hippocampus.Single.WGS.ON22213.Neuron-#10|1,Hippocampus.Single.WGS.ON22213.Neuron-#14|4,Hippocampus.Single.WGS.ON22213.Neuron-#38|4,Liver.Bulk.WGS.ON22212|19,Liver.Bulk.WGS.ON22213|20,Hippocampus.Single.RC-seq.ON22212.Neuron-#16|2,Hippocampus.Single.RC-seq.ON22212.Neuron-#7|3,Hippocampus.Single.RC-seq.ON22213.N…	AGTGGAATGTGGTAAACAGGCTCTGGATATTCACAGAGCAATGGTCAAAGCTAGGAAAAATGTTTCAGCGTGGGTGATACCTTAATACTAAAGTGTTTCTGTAGTTGGTTTAAGTCTGCAGAGTCTCATTTCAAGATAAGATTCCAGGCCGGGCGCGGTGGCTCAAGCCTGTAATCCCAGCACTTTGGGAGGCCGAGACGGGCGGATCACGAGGGCAGGAGATCGAAAAGGACCATCCTGGCTAAGATGGTGAAACCCCGTCTCTACTAAA	TTGCGTCGGCCGTCCTTTGGGTTGAACCCGGGCGGGGGATCTTGAATTGTGAGTAGATCCGCCCATTGCAATCCCCCCTGGGCCACTCTTCAACAACCCGTATCAAAAAAAAAAAAAAAAAAAAAAAAAGATTCCATTTGGGAAAACGCCGGAAGGCTTCTCTTAGATTACAAATAGTATAGAAGAAGATGTATATGGAGCTGTCTTGTATGCAGTATCTGCTCAACAAATGTTGTTTGGATTCTGAATCTTGAATGCCCAAGCCTTACCGGAGGGAGG	CACAGAGCAATGGTCAAAGCTAGGAAAAATGTTTCAGCGTGGGTGATACCTTAATACTAAAGTGTTTCTGTAGTTGGTTTAAGTCTGCAGAGTCTCATTTCAAGATAAGATTCCAGGCCGGGCGCGGTGGCTCAAGCCTGTAATCCCAGCACTTTGGGAGGCCGAGACGGGCGGATCACGAGGGCAGGAGATCGAGACACATCCTGGCTAAGATGGTGAAACCCCGTCTCTACTAAAAAATACAAAAAAAAAAAAAAAAAACTAGCCGGGCAAGGTGGCGGGCGCCTGTAGTCCCAGCCTCCC	CACAGAGCAATGGTCAAAGCTAGGAAAAATGTTTCAGCGTGGGTGATACCTTAATACTAAAGTGTTTCTGTAGTTGGTTTAAGTCTGCAGAGTCTCATTTCAAGATAAGATTCCAGGCCGGGCGCGGTGGCTCAAGCCTGTAATCCCAGCACTTTGGGAGGCCGAGACGGGCGGATCACGAGGGCAGGAGATCGAGACACATCCTGGCTAAGATGGTGAAACCCCGTCTCTACTAAAAAATACAAAAAAAAAAAAAAAAAACTAGCCGGGCAAGGTGGCGGGCGCCTGTAGTCCCAGCCTCCC
b50088da-96a5-4f61-b62a-2fadbcb58944	Chr1	102303535	102303547	ALU	Alu_YRb4	0	258	+	+	N	AATAACTGACTGA	Hippocampus.Single.WGS.ON22212.Neuron-#10|25,Hippocampus.Single.WGS.ON22212.Neuron-#19|17,Hippocampus.Single.WGS.ON22212.Neuron-#21|1,Hippocampus.Single.WGS.ON22212.Neuron-#7|2,Hippocampus.Single.WGS.ON22213.Neuron-#15|1,Hippocampus.Single.WGS.ON22213.Neuron-#23|4,Hippocampus.Single.WGS.ON22213.Neuron-#25|9,Hippocampus.Single.WGS.ON22213.Neuron-#31|5,Hippocampus.Single.WGS.ON22213.Neuron-#39|10,L…	Hippocampus.Single.WGS.ON22212.Neuron-#10|11,Hippocampus.Single.WGS.ON22212.Neuron-#19|22,Hippocampus.Single.WGS.ON22212.Neuron-#21|1,Hippocampus.Single.WGS.ON22212.Neuron-#7|1,Hippocampus.Single.WGS.ON22213.Neuron-#23|8,Hippocampus.Single.WGS.ON22213.Neuron-#25|15,Hippocampus.Single.WGS.ON22213.Neuron-#31|8,Hippocampus.Single.WGS.ON22213.Neuron-#39|9,Liver.Bulk.WGS.ON22212|16,Liver.Bulk.WGS.ON22…	AGCTGATCTCTAGGGAGCTGTATATAGCTGGCCATATAAATATCTATCTACTTACAGATATTTTATTATACTCTATATCTAGTTATATATAGGCAGACAAATCTAAGATACAGATCAGATACCAACCTATTTCCTGGATCCTTATGTCAGAAATACCTGGACACTGCACTGAAAAAAGGGTTCATAATTTTTAAAATGCACAGCTTCTGTAAAAAGTCTCATGTGCCTATATGTCTATATGAACATAGATCTAGATATGTGGATTACATAGATACAATAACTGACTGAGGCCGGGCGCGGTGGCTCACGCCTGTAATCCCAGCACTTTGGGAGGCCGAGGCGGGCGGATCACAAGGTCAGGAGATCGAGACCACGGTGAAACCCCGTCTCTACTAAAAA…	AGCTGATCTCTAGGGAGCTGTATATAGCTGGCCATATAAATATCTATCTACTTACAGATATTTTATTATACTCTATATCTAGTTATATATAGGCAGACAAATCTAAGATACAGATCAGATACCAACCTATTTCCTGGATCCTTATGTCAGAAATACCTGGACACTGCACTGAAAAAAGGGTTCATAATTTTTAAAATGCACAGCTTCTGTAAAAAGTCTCATGTGCCTATATGTCTATATGAACATAGATCTAGATATGTGGATTACATAGATACAATAACTGACTGAGGCCGGGCGCGGTGGCTCACGCCTGTAATCCCAGCACTTTGGGAGGCCGAGGCGGGCGGATCACAAGGTCAGGAGATCGAGACCACGGTGAAACCCCGTCTCTACTAAAAA…	TTCATAATTTTTAAAATGCACAGCTTCTGTAAAAAGTCTCATGTGCCTATATGTCTATATGAACATAGATCTAGATATGTGGATTACATAGATACAATAACTGACTGAGGCCGGGCGCGGTGGCTCACGCCTGTAATCCCAGCACTTTGGGAGGCCGAGGCGGGCGGATCACAAGGTCAGGAGATCGAGACCACGGTGAAACCCCGTCTCTACTAAAAATACAAAAAAAAAAAATTAGCCGGGCGCGGTGGCGGGCGCCTGTAGTCCCAGCTACTCAGGAGGCTGAGGCAGGAGAATGGCGTAAACCCAGGAGGCGGAGCTTGCAGTGAGCCGAGATCGCGCCACTGCACTCCAGCCTGGGCGACAGAGTGAGACTCCGTCTCAAAAAAAAAAAAATAA…	TTCATAATTTTTAAAATGCACAGCTTCTGTAAAAAGTCTCATGTGCCTATATGTCTATATGAACATAGATCTAGATATGTGGATTACATAGATACAATAACTGACTGAGGCCGGGCGCGGTGGCTCACGCCTGTAATCCCAGCACTTTGGGAGGCCGAGGCGGGCGGATCACAAGGTCAGGAGATCGAGACCACGGTGAAACCCCGTCTCTACTAAAAATACAAAAAAAAAAAATTAGCCGGGCGCGGTGGCGGGCGCCTGTAGTCCCAGCTACTCAGGAGGCTGAGGCAGGAGAATGGCGTAAACCCAGGAGGCGGAGCTTGCAGTGAGCCGAGATCGCGCCACTGCACTCCAGCCTGGGCGACAGAGTGAGACTCCGTCTCAAAAAAAAAAAAATAA…
c5fa7a8d-f1ae-4dba-80b2-238fd7187230	Chr1	102982295	102982275	ALU	Alu_YRa4	0	270	+	+	N	AGAAAAACTATAGAAAAATCG	Hippocampus.Single.WGS.ON22212.Neuron-#19|29,Hippocampus.Single.WGS.ON22213.Neuron-#52|6,Liver.Bulk.WGS.ON22212|21,Liver.Bulk.WGS.ON22213|9,Hippocampus.Single.RC-seq.ON22212.Neuron-#19|19,Hippocampus.Single.RC-seq.ON22213.Neuron-#52|3	Hippocampus.Single.WGS.ON22212.Neuron-#19|8,Hippocampus.Single.WGS.ON22213.Neuron-#69|1,Hippocampus.Single.WGS.ON22213.Neuron-#23|3,Hippocampus.Single.WGS.ON22213.Neuron-#52|8,Liver.Bulk.WGS.ON22212|21,Liver.Bulk.WGS.ON22213|12,Hippocampus.Single.RC-seq.ON22213.Neuron-#23|1,Hippocampus.Single.RC-seq.ON22213.Neuron-#52|3	AGATGATAGGAGTTGGTTGGGGAGGTTGCAGTGAGCCAAGATTATGCCACTGCACTCCAGCCTGCACAACAGAGTGACACCCTGACTCAAAAAATAAAATAAAATAAAATCATGATAAAAAATAAATGCCTGCATTAAAAAAGAAGATCTCAAATAAATAACCTAACATTACACTTCAAGGAACTAAGAAAAGATCAAAATGAAATTAGCAAAAGGAAGAAAATAATAAAATTCAAAGCAGAAGCAAATCAATTAAAGAATAGAAAAACTATAGAAAAATCGGCCGGGCGCGGTGGCTCAAGCCTGTAATCCCAGCACTTTGGGAGGCCGAGACGGGCGGATCACGAGGTCAGGAGATCGAAACCATCCTGGCTAACACGGTGAAACCCCGTCTCTATT…	GGTTTTTCGCGGGTGGGGGTGGTTGCTGTGAGCTTAGAGTAGGCCACTGCACTCCAGCCTGGGCTACAGATCTAGACTCCGTCTCAAAAAAAAAAAAAAGAAAAAAGAAAAAGAAAAACTATAGAAAAATCGACAAAACTGAGTTAATTTTTCAAAAAATAAACAAAATTGACAAACTTTTAACTAGACTAAAAAAAAGAGGGAAGAGTTAAATAAATAGCATCAAAAATGAAAATGGAGGCATTTGTCAACAAATGCCT	CCTAACATTACACTTCAAGGAACTAAGAAAAGATCAAAATTAAATTAGCAAAAGGAAGAAAATAATAAAATTCAAAGCAGAAGCAAATCAATTAAAGAATAGAAAAACTATAGAAAAATCGGCCGGGCGCGGTGGCTCAAGCCTGTAATCCCAGCACTTTGGGAGGCCGAGACGGGCGGATCACGAGGTCAGGAGATCGAAACCATCCTGGCTAACACTGGGTGAAACCCCGTCTCTATTAAGAAATACAAAAAACTAGCCGGGCGAGGTGGCGGGCGCCTGTAGTCCCAGCTACTCGGGAGGCTGAGGCCGGAGAATGGCGTGAACCCGGGAGGCGGAGCTTGCAGTGAGCTGAGATCCGGCCACTGCACTCCAGCCTGGGCGACAGAGCGAGACTCC…	CCTAACATTACACTTCAAGGAACTAAGAAAAGATCAAAATTAAATTAGCAAAAGGAAGAAAATAATAAAATTCAAAGCAGAAGCAAATCAATTAAAGAATAGAAAAACTATAGAAAAATCGGCCGGGCGCGGTGGCTCAAGCCTGTAATCCCAGCACTTTGGGAGGCCGAGACGGGCGGATCACGAGGTCAGGAGATCGAAACCATCCTGGCTAACACTGGGTGAAACCCCGTCTCTATTAAGAAATACAAAAAACTAGCCGGGCGAGGTGGCGGGCGCCTGTAGTCCCAGCTACTCGGGAGGCTGAGGCCGGAGAATGGCGTGAACCCGGGAGGCGGAGCTTGCAGTGAGCTGAGATCCGGCCACTGCACTCCAGCCTGGGCGACAGAGCGAGACTCC…
b9e9468b-99bb-401d-8042-d8abdd6b3ec9	Chr1	104030289	104030301	ALU	Alu_YRa4	0	270	-	-	N	TTATGTTTTATTT	Hippocampus.Single.WGS.ON22212.Neuron-#19|1,Hippocampus.Single.WGS.ON22212.Neuron-#21|35,Hippocampus.Single.WGS.ON22212.Neuron-#7|7,Hippocampus.Single.WGS.ON22213.Neuron-#69|11,Hippocampus.Single.WGS.ON22213.Neuron-#71|6,Hippocampus.Single.WGS.ON22213.Neuron-#23|1,Hippocampus.Single.WGS.ON22213.Neuron-#39|1,Hippocampus.Single.WGS.ON22213.Neuron-#52|1,Hippocampus.Single.WGS.ON22213.Neuron-#47|12,H…	Hippocampus.Single.WGS.ON22212.Neuron-#17|2,Hippocampus.Single.WGS.ON22212.Neuron-#19|1,Hippocampus.Single.WGS.ON22212.Neuron-#21|45,Hippocampus.Single.WGS.ON22213.Neuron-#69|7,Hippocampus.Single.WGS.ON22213.Neuron-#71|8,Hippocampus.Single.WGS.ON22213.Neuron-#23|3,Hippocampus.Single.WGS.ON22213.Neuron-#52|1,Hippocampus.Single.WGS.ON22213.Neuron-#47|13,Hippocampus.Single.WGS.ON22213.Neuron-#49|56,…	CCAGCACTTTGGGAGGCTGAGGTGGGCGTATCACCTGAGATCAGGAGTTCAAGACCAGGCTAGCCAACATGGTGAAACCCTGTCTCCACCAAAAATACAAAAATTAGCTGGACATGGTGGCCCACGCCTGTAATCCCAGCTACACAGGAGGCTGAGGCTGGAGAATCTCTTGAATCCGGGAGGCAGAGGTTGCAGTGAGCCGAGATCGTGGCACTGCACTCCAGCCTGGGTGATAGAGCAGACTCTGTCTCAAAAAATAAAACATAATGGCCGGGCGCGGTGGCTCAAGCCTGTAATCCCAGCACTTTGGGAGGCCGAGACGGGCGGATCACGAGGTCAGGAGATCGAGACCATCCTGGGTAACACAGTGAAACCCCGTCTCTACTAAAAATACAAAAA…	TACATTAATAGTACAATTGGTAAGATACTGAGTGCTTATTCCTTGACAGCCTCTGTACTAAAAGCTTTTCTCCATCTCACGTATGAGATTAACATTATTATTATACCCATTTTATTTATTTATTTATCTATTTATGTTTTATTTATTTATTTATTTATTTATTTATTTATTTTTTTGAGACGGAGTCTCGCTCTGTCTTACTA	AAAATAAAACATAATGGCCGGGCGCGGTGGCTCAAGCCTGTAATCCCAGCACTTTGGGAGGCCGAGACGGGCGGATCACGAGGTCAGGAGATCGAGACCATCCTGGGTAACACAGTGAAACCCCGTCTCTACTAAAAATACAAAAACTTAGCTGGGCGAGGTGGCGGGCGCCTGTAGTCCCAGCTACTCGGGAGGCTGAGGCAGGAGAATGGCGTGAACCCGGGAGGCGGAGCTTGCAGTGAGCTGAGATCCGGCCACTGCACTCCAGCCTGGGTGACAGAGCGAGACTCCGTCTCAAAAAAATAAATAAATAAATAAATACAAAAATAAATAAAACATAAATAGATAAATAAATAAATAAAATGGGTATAATAATAATTGTTAATCTCATACGTGAGA…	AAAATAAAACATAATGGCCGGGCGCGGTGGCTCAAGCCTGTAATCCCAGCACTTTGGGAGGCCGAGACGGGCGGATCACGAGGTCAGGAGATCGAGACCATCCTGGGTAACACAGTGAAACCCCGTCTCTACTAAAAATACAAAAACTTAGCTGGGCGAGGTGGCGGGCGCCTGTAGTCCCAGCTACTCGGGAGGCTGAGGCAGGAGAATGGCGTGAACCCGGGAGGCGGAGCTTGCAGTGAGCTGAGATCCGGCCACTGCACTCCAGCCTGGGTGACAGAGCGAGACTCCGTCTCAAAAAAATAAATAAATAAATAAATACAAAAATAAATAAAACATAAATAGATAAATAAATAAATAAAATGGGTATAATAATAATTGTTAATCTCATACGTGAGA…
f6a36276-ffac-4a9d-b1db-c2ed0e881e56	Chr1	104110489	104110514	ALU	Alu_YRd4	0	269	-	-	N	GCGCCCGGCCGGTTTTTTGTATTTTT	Hippocampus.Single.WGS.ON22212.Neuron-#19|4,Hippocampus.Single.WGS.ON22212.Neuron-#7|3,Hippocampus.Single.WGS.ON22213.Neuron-#71|7,Hippocampus.Single.WGS.ON22213.Neuron-#25|2,Hippocampus.Single.WGS.ON22213.Neuron-#38|5,Hippocampus.Single.WGS.ON22213.Neuron-#47|1,Liver.Bulk.WGS.ON22212|11,Liver.Bulk.WGS.ON22213|7,Hippocampus.Single.RC-seq.ON22212.Neuron-#7|4,Hippocampus.Single.RC-seq.ON22213.Neuro…	Hippocampus.Single.WGS.ON22212.Neuron-#19|5,Hippocampus.Single.WGS.ON22212.Neuron-#7|9,Hippocampus.Single.WGS.ON22213.Neuron-#69|2,Hippocampus.Single.WGS.ON22213.Neuron-#71|6,Hippocampus.Single.WGS.ON22213.Neuron-#23|1,Hippocampus.Single.WGS.ON22213.Neuron-#25|4,Hippocampus.Single.WGS.ON22213.Neuron-#31|1,Hippocampus.Single.WGS.ON22213.Neuron-#38|11,Hippocampus.Single.WGS.ON22213.Neuron-#39|3,Liv…	AGTAGAGACGGGGTTTCACCGTGTCAGCCAGGATGGTCTCCATCTCCTGACCTCATGATCCGCCCGCCTCGGCCTCCCAAAGTGCTGGGCTTACAGGCTTGAGCCACCGCGCCCGGCCGGTTTTTTGTATTTTTAGTTGAGACGGGGCCGTGGTCTTGATCTCCTGACCTTGTGATCCGCCCGCCTCGGCCTGCCCAAAGTGCTGGGATTACGAGGCGTGAGCCGCCGCCACCCGGCATGCCCCTATCTTTTAATGCTG	ACGGAGTCTCGCTCTGTCGCCCAGGCTGGAGTGCAGTAGTGCAATCTCAGCTCACTGCAAGCTCCGCCTCCCGGGTTCACGCCATTCTCCTGCCTCAGCCTCCCGAGTAGCTGGGACTACAGGCGCCCGGCCGGTTTTTTGTATTTTTTTTTGTATTTTTTTTTTTTTTTTTAAAAG	GGAAAGCGACCTCTGCCTCAGCCTCATGTCCTGGTGTATTGGTCTGTTCTCATGCTGCTATGAAGAACTATCTGAGACCGGGTAATTTATAAAGGACAGAGGTTGGCCGGGCGCAGTGGCTCAAGCCTGTAATCCCAGCACTTTGGGAGGCCGAGGCGGGCGGATCATGAGGTCAGGAGATGGAGACCATCCTGGCTGACACGGTGAAACCCCGTCTCTACTAAAAAATACAAAAAACTAGCCGGGCGAGGTGGCGGGCGCCTGTAGTCCCAGCTACTGGGGAGGCTGAGGCAGGAGAATGGCGTGAACCCGGGAGGCGGAGCCTGCAGTGAGCTGAGATCCGGCCACTGCACTCCAGCCTGGGCAGCAGAGCGAGACTCCGTCTCAAAAAAAAAAAAA…	GGAAAGCGACCTCTGCCTCAGCCTCATGTCCTGGTGTATTGGTCTGTTCTCATGCTGCTATGAAGAACTATCTGAGACCGGGTAATTTATAAAGGACAGAGGTTGGCCGGGCGCAGTGGCTCAAGCCTGTAATCCCAGCACTTTGGGAGGCCGAGGCGGGCGGATCATGAGGTCAGGAGATGGAGACCATCCTGGCTGACACGGTGAAACCCCGTCTCTACTAAAAAATACAAAAAACTAGCCGGGCGAGGTGGCGGGCGCCTGTAGTCCCAGCTACTGGGGAGGCTGAGGCAGGAGAATGGCGTGAACCCGGGAGGCGGAGCCTGCAGTGAGCTGAGATCCGGCCACTGCACTCCAGCCTGGGCAGCAGAGCGAGACTCCGTCTCAAAAAAAAAAAAA…
8c4d8b4f-0a43-4664-b1de-01359f2dd951	Chr1	106523689	106523705	ALU	Alu_YRa4	0	270	+	+	N	AAGAGATTGCAGCTTCC	Hippocampus.Single.WGS.ON22213.Neuron-#69|2,Hippocampus.Single.WGS.ON22213.Neuron-#25|1,Hippocampus.Single.WGS.ON22213.Neuron-#39|8,Hippocampus.Single.WGS.ON22213.Neuron-#52|1,Hippocampus.Single.WGS.ON22213.Neuron-#47|4,Hippocampus.Single.WGS.ON22213.Neuron-#49|2,Liver.Bulk.WGS.ON22213|11,Hippocampus.Single.RC-seq.ON22213.Neuron-#39|3,Hippocampus.Single.RC-seq.ON22213.Neuron-#47|1	Hippocampus.Single.WGS.ON22213.Neuron-#39|12,Hippocampus.Single.WGS.ON22213.Neuron-#52|3,Hippocampus.Single.WGS.ON22213.Neuron-#47|6,Hippocampus.Single.WGS.ON22213.Neuron-#49|6,Liver.Bulk.WGS.ON22213|13,Hippocampus.Single.RC-seq.ON22213.Neuron-#39|7	AAGTCTATTGTATTTGTCTACTCAATCCAAATAGAAATAATAATTCTTTAAAAGTTAATATCTATTATGGCAACAACAACAACAATAAAAAACAGAAGGTTCATGTGTAAGATCTTTGTGGGAAAAAAATCCCACAAAAATTTATTGAAAGGCAATAAAGAAGATCCAAATAAGTGAATAGAAATACTGTTAATGATGAAAACCTCAATACCTGAAAGATGTCAGTTTCCTAAAGACATACTTGCTCCACCTTGAAAGGAGATTAAGAGATTGCAGCTTCCGCCGGGCGCGGTGGCTCAAGCCTGTAATCCCAGCACTTTGGGAGGCCGAGACGGGCGGATCACAAGGTCAGTAGATCGAGACCATCCTGGCTAACACGGTGAAACCCCGTCTCTACTA…	AAGTCTATTGTATTTGTCTACTCAATCCAAATAGAAATAATAATTCTTTAAAAGTTAATATCTATTATGGCAACAACAACAACAATAAAAAACAGAAGGTTCATGTGTAAGATCTTTGTGGGAAAAAAATCCCACAAAAATTTATTGAAAGGCAATAAAGAAGATCCAAATAAGTGAATAGAAATACTGTTAATGATGAAAACCTCAATACCTGAAAGATGTCAGTTTCCTAAAGACATACTTGCTCCACCTTGAAAGGAGATTAAGAGATTGCAGCTTCCGCCGGGCGCGGTGGCTCAAGCCTGTAATCCCAGCACTTTGGGAGGCCGAGACGGGCGGATCACAAGGTCAGTAGATCGAGACCATCCTGGCTAACACGGTGAAACCCCGTCTCTACTA…	AGATCCAAATAAGTGAATAGAAATACTGTTAATGATGAAAACCTCAATACCTGAAAGATGTCAGTTTCCTAAAGACATACTTGCTCCACCTTGAAAGGAGATTAAGAGATTGCAGCTTCCGCCGGGCGCGGTGGCTCAAGCCTGTAATCCCAGCACTTTGGGAGGCCGAGACGGGCGGATCACAAGGTCAGTAGATCGAGACCATCCTGGCTAACACGGTGAAACCCCGTCTCTACTAAAAAATACAAAAAACTAGCCGGGCGAGGTGGCGGGCGCCTGTGGTCCCAGCTACTCCGGAGGCTGAGGCAGGAGAATGGCGTAAACCCGGGAGGCGGAGCTTGCAGTGAGCTGAGATCCGGCCACTGCACTCCAGCCTGGGCGACAGAGCCAGACTCAGTC…	AGATCCAAATAAGTGAATAGAAATACTGTTAATGATGAAAACCTCAATACCTGAAAGATGTCAGTTTCCTAAAGACATACTTGCTCCACCTTGAAAGGAGATTAAGAGATTGCAGCTTCCGCCGGGCGCGGTGGCTCAAGCCTGTAATCCCAGCACTTTGGGAGGCCGAGACGGGCGGATCACAAGGTCAGTAGATCGAGACCATCCTGGCTAACACGGTGAAACCCCGTCTCTACTAAAAAATACAAAAAACTAGCCGGGCGAGGTGGCGGGCGCCTGTGGTCCCAGCTACTCCGGAGGCTGAGGCAGGAGAATGGCGTAAACCCGGGAGGCGGAGCTTGCAGTGAGCTGAGATCCGGCCACTGCACTCCAGCCTGGGCGACAGAGCCAGACTCAGTC…
f85c6c25-5aa1-4d86-ad09-6d3a88b1c2e2	Chr1	109617120	109617104	ALU	Alu_YRb4	0	257	-	-	N	TTGTTTTGTTTTGTTTT	Hippocampus.Single.WGS.ON22212.Neuron-#10|8,Hippocampus.Single.WGS.ON22212.Neuron-#16|57,Hippocampus.Single.WGS.ON22212.Neuron-#19|1,Hippocampus.Single.WGS.ON22212.Neuron-#37|1,Liver.Bulk.WGS.ON22212|10,Hippocampus.Single.RC-seq.ON22212.Neuron-#10|4,Hippocampus.Single.RC-seq.ON22212.Neuron-#16|30,Hippocampus.Single.RC-seq.ON22212.Neuron-#19|1,Hippocampus.Single.RC-seq.ON22212.Neuron-#7|1	Hippocampus.Single.WGS.ON22212.Neuron-#10|5,Hippocampus.Single.WGS.ON22212.Neuron-#16|25,Hippocampus.Single.WGS.ON22212.Neuron-#19|2,Hippocampus.Single.WGS.ON22212.Neuron-#21|1,Liver.Bulk.WGS.ON22212|5,Hippocampus.Single.RC-seq.ON22212.Neuron-#10|2,Hippocampus.Single.RC-seq.ON22212.Neuron-#16|13,Hippocampus.Single.RC-seq.ON22213.Neuron-#38|1,Hippocampus.Single.RC-seq.ON22213.Neuron-#39|1	ATTTAATTTAATTTGATTCCTGTTGAGGTTGAGCATCCTATTTATTGGTCTCTTGAATATCATCTTTTATAAAAATCTTTGTCTCTTTCCATTACATTGTTTACTCTCTTGTTTTGTTTTTGGTTTTGTTTTTGTTTTGTTTTGTTTTGTTTTTGTTGTTTTGTTTTGTTTTGTTGAGACGGAGTCTTGCTCTGTCACCCAGGCTGGAGTGCAGTGGCACTATCTCGGCTCACTGCAAACTCCGCCTCCCGGGTTTACCC	CCCCCCCCCCTGCCCCTCTGCCCCCCACCCCCTCAAAACAAACTAACAAATTATTTTCGGGGTTTGGGTCCCTCCCAATCTTCCCCCTTGCGTTCGGTATTCTCAGCCTCCCCCCCCGGCGCCCGGCCCTTGTTTTGTTTTGTTTTTGAGATGGAGTCTCACTCTGTTGCCCAGGCTGGAGTGCAGTGGCGTGATCTCAGCTCGCTGCAACTTCTGCCTCCCAGGTTCAGTGAA	AGTGAGACTCCATCTCAAAAACAAAACAAAACAAGGGCCGGGCGCGGTGGCTCAAGCCTGTAATCCCAGCACTTTGGGAGGCCGAGACGGGTGGATCACGAGGTCAGGAGATCGAGACCATCCTGGCTAACACAATGAAACCCCGTCTCTACTAAAAATACAAAAAAATTAGCCGGGCGAGGTGGCGGGCGCCTGTAGTCCCAGCTACTCGGGAGGCTGAGGCAGGAGAATGGCGTAAACCCGGGAGGCGGAGTTTGCAGTGAGCCGAGATAGTGCCACTGCACTCCAGCCTGGGCGACAGAGCGAGACTCCGTCTCAAAAAACCAAACAAAACAAAACAAAAACAAAACCAAAAACAAAACAAGAGAGTAAACAATGTAATGGAAAGAGACAAAGATT…	AGTGAGACTCCATCTCAAAAACAAAACAAAACAAGGGCCGGGCGCGGTGGCTCAAGCCTGTAATCCCAGCACTTTGGGAGGCCGAGACGGGTGGATCACGAGGTCAGGAGATCGAGACCATCCTGGCTAACACAATGAAACCCCGTCTCTACTAAAAATACAAAAAAATTAGCCGGGCGAGGTGGCGGGCGCCTGTAGTCCCAGCTACTCGGGAGGCTGAGGCAGGAGAATGGCGTAAACCCGGGAGGCGGAGTTTGCAGTGAGCCGAGATAGTGCCACTGCACTCCAGCCTGGGCGACAGAGCGAGACTCCGTCTCAAAAAACCAAACAAAACAAAACAAAAACAAAACCAAAAACAAAACAAGAGAGTAAACAATGTAATGGAAAGAGACAAAGATT…
ebffc3b7-8e6d-4d4e-ae79-281f64cf8ca7	Chr1	109623086	109623102	ALU	Alu_YRa4	0	270	-	-	N	CTAGAATTAATTTTTTT	Hippocampus.Single.WGS.ON22212.Neuron-#37|45,Hippocampus.Single.WGS.ON22212.Neuron-#7|2,Liver.Bulk.WGS.ON22212|14,Hippocampus.Single.RC-seq.ON22212.Neuron-#37|1	Hippocampus.Single.WGS.ON22212.Neuron-#37|71,Hippocampus.Single.WGS.ON22212.Neuron-#7|1,Hippocampus.Single.WGS.ON22213.Neuron-#31|2,Liver.Bulk.WGS.ON22212|19,Hippocampus.Single.RC-seq.ON22212.Neuron-#37|1,Hippocampus.Single.RC-seq.ON22213.Neuron-#31|1,Hippocampus.Single.RC-seq.ON22213.Neuron-#52|1	TCCCAAAGTGCTAGGATTACAGGTATGAATCACGGTGCCTGGACAGATTTTTTAGTTTTTGTGAATACGGTGGGTATAAAAAATGGTATTGCACTGTGGCTTACATTTACACTTCCCTGAATGTAAATGATGTAGTGAGGTTGCATGTCTCTTCAATTACTTATATGCTTATCATGTTTCTTCTTTTTTGAATGTTTGTTCCTGTCTTTTTCTCATTTTTCTATTGGATTGTTTATCTTTTTCTTACTGATTTTCAGGTGTTTTTTAAAAAAAATTAATTCTAGGCCGGGCGCGGTGGCTCAAGCCTGTAATCCCAGCACTTTGGGAGGCCGAGACGGGCGGATCACGAGGTCAGGAGATCGAGACCATCCTGGCTAACCCGGTGAAACCCCGTCTCTA…	TCCCAAAGTGCTAGGATTACAGGTATGAATCACGGTGCCTGGACAGATTTTTTAGTTTTTGTGAATACGGTGGGTATAAAAAATGGTATTGCACTGTGGCTTACATTTACACTTCCCTGAATGTAAATGATGTAGTGAGGTTGCATGTCTCTTCAATTACTTATATGCTTATCATGTTTCTTCTTTTTTGAATGTTTGTTCCTGTCTTTTTCTCATTTTTCTATTGGATTGTTTATCTTTTTCTTACTGATTTTCAGGTGTTTTTTAAAAAAAATTAATTCTAGGCCGGGCGCGGTGGCTCAAGCCTGTAATCCCAGCACTTTGGGAGGCCGAGACGGGCGGATCACGAGGTCAGGAGATCGAGACCATCCTGGCTAACCCGGTGAAACCCCGTCTCTA…	TTTTAAAAAAAATTAATTCTAGGCCGGGCGCGGTGGCTCAAGCCTGTAATCCCAGCACTTTGGGAGGCCGAGACGGGCGGATCACGAGGTCAGGAGATCGAGACCATCCTGGCTAACCCGGTGAAACCCCGTCTCTAGTAAAAAAATATAAAAAAATAGCCGGGCGAGGTGGCGAGCGTCTGTAGTCCCAGCTACTCGGGAGGCTGAGGCAGGAGAATGGCGTAAACCCGGGAGGCGGAGCTTGCAGTGAGCCGAGATCCGGCCACTGCACTCCAGGCTGGGCGACAGAGCGAGACTCCGTCTCAAATAAAAATTAATAAAATAAAATAAAAAAATAAAAAAATAAAAAAATAAAAAAAAAATTAATTCTAGACACTATTCATTTGGTAGATACATATG…	TTTTAAAAAAAATTAATTCTAGGCCGGGCGCGGTGGCTCAAGCCTGTAATCCCAGCACTTTGGGAGGCCGAGACGGGCGGATCACGAGGTCAGGAGATCGAGACCATCCTGGCTAACCCGGTGAAACCCCGTCTCTAGTAAAAAAATATAAAAAAATAGCCGGGCGAGGTGGCGAGCGTCTGTAGTCCCAGCTACTCGGGAGGCTGAGGCAGGAGAATGGCGTAAACCCGGGAGGCGGAGCTTGCAGTGAGCCGAGATCCGGCCACTGCACTCCAGGCTGGGCGACAGAGCGAGACTCCGTCTCAAATAAAAATTAATAAAATAAAATAAAAAAATAAAAAAATAAAAAAATAAAAAAAAAATTAATTCTAGACACTATTCATTTGGTAGATACATATG…
62412937-7243-47c9-ac43-4f1b2a63331b	Chr1	109662940	109662929	ALU	Alu_YRa4	0	269	+	+	N	TTTCACATTAAC	Hippocampus.Single.WGS.ON22212.Neuron-#10|1,Hippocampus.Single.WGS.ON22212.Neuron-#19|9,Hippocampus.Single.WGS.ON22212.Neuron-#21|1,Hippocampus.Single.WGS.ON22213.Neuron-#15|7,Hippocampus.Single.WGS.ON22213.Neuron-#71|1,Hippocampus.Single.WGS.ON22213.Neuron-#25|3,Liver.Bulk.WGS.ON22212|16,Liver.Bulk.WGS.ON22213|14,Hippocampus.Single.RC-seq.ON22213.Neuron-#15|6	Hippocampus.Single.WGS.ON22212.Neuron-#19|3,Hippocampus.Single.WGS.ON22212.Neuron-#21|1,Hippocampus.Single.WGS.ON22213.Neuron-#15|14,Hippocampus.Single.WGS.ON22213.Neuron-#25|4,Liver.Bulk.WGS.ON22212|8,Liver.Bulk.WGS.ON22213|11,Hippocampus.Single.RC-seq.ON22212.Neuron-#19|1,Hippocampus.Single.RC-seq.ON22212.Neuron-#7|1,Hippocampus.Single.RC-seq.ON22213.Neuron-#15|2,Hippocampus.Single.RC-seq.ON222…	AGCATATGTATGCTATATATATATATATATACACACACACACACACACAGTGTCATCGCATTTACACATAAAAACACAATGCATGTTTTTTCTATATAGTCACATCTATTTTTACTAATTTTACTAATTTTCACATTAACGGCCGGGCACGGTGGCTCAAGCCTGTAATCCCAGCACTTTGGGAGGCCGAGATGGGCGGATCACGAGCGGGGT	GGGGGGGGTGTTTTGCCTCGCGTCGCCCCCCCCCACCGCCACCAACCCCGGGCCAAACCCCACCAAACAACAAAAAAAAAAAAAAAAAAAAAAAAAAAAAAAAAAAAAAAAAAAAAAAATTTCACATTAACTATGAGGCTATTTGCATTTATATAAGGTACGTAGGGTAGACAAACTCATAGAGATAGAAAATGGAATGAGAGTTGCCAGGGGCTGGGGAAATGGGAAATGTGGAGTTGTTTAACAGGTAGAGAAGAGTTTTAATC	CACACACACACACAGTGTCATCGCATTTACACATAAAAACACAATGCATGTTTTTTCTATATAGTCACATCTATTTTTACTAATTTTACTAATTTTCACATTAACGGCCGGGCACGGTGGCTCAAGCCTGTAATCCCAGCACTTTGGGAGGCCGAGATGGGCGGATCACGAGGTCAGGAGATCGAGACCATCCTGGCTAACACGGTGAAACCCCGTCTCTACTAAGAAATACAAAAAATAGCCGGCGAGGTGGCAGCGCCTGTAGTCCCAGCTACTCAGGAGGCTGAGGCAGGAGAATGGCGTGAACCCGGGAGGCGGAGCTTGCAGTGAGCTGAGATCCGGCCACTGCACTCCAGCCTGGGCTACAGAGCGAGACTCCGTCTCAAAAAAAAATAAAAA…	CACACACACACACAGTGTCATCGCATTTACACATAAAAACACAATGCATGTTTTTTCTATATAGTCACATCTATTTTTACTAATTTTACTAATTTTCACATTAACGGCCGGGCACGGTGGCTCAAGCCTGTAATCCCAGCACTTTGGGAGGCCGAGATGGGCGGATCACGAGGTCAGGAGATCGAGACCATCCTGGCTAACACGGTGAAACCCCGTCTCTACTAAGAAATACAAAAAATAGCCGGCGAGGTGGCAGCGCCTGTAGTCCCAGCTACTCAGGAGGCTGAGGCAGGAGAATGGCGTGAACCCGGGAGGCGGAGCTTGCAGTGAGCTGAGATCCGGCCACTGCACTCCAGCCTGGGCTACAGAGCGAGACTCCGTCTCAAAAAAAAATAAAAA…
ffb1b5ea-6b66-4dce-bdcb-880e6952176d	Chr1	109726677	109726693	ALU	Alu_YRa4	0	270	-	-	N	TCATTACCTATTTTATT	Hippocampus.Single.WGS.ON22213.Neuron-#15|10,Hippocampus.Single.WGS.ON22213.Neuron-#47|24,Liver.Bulk.WGS.ON22213|12,Hippocampus.Single.RC-seq.ON22213.Neuron-#15|5,Hippocampus.Single.RC-seq.ON22213.Neuron-#47|5	Hippocampus.Single.WGS.ON22212.Neuron-#17|1,Hippocampus.Single.WGS.ON22213.Neuron-#15|12,Hippocampus.Single.WGS.ON22213.Neuron-#47|28,Liver.Bulk.WGS.ON22213|18,Hippocampus.Single.RC-seq.ON22213.Neuron-#15|10,Hippocampus.Single.RC-seq.ON22213.Neuron-#47|4	AAGATAGACAAAGAAAATAAAAGAAAAAAGAAAGAAAGAAAAAAAATTTAAGAAAAAGGGTAGAACATCCAGACTATCACAAAGAACTGCAACTTTAAAATGTCAAATAACCTAATTAAATAATGGACAAAAGTCTGAACAGACATTTCATCAGAGAAGATACACTAATGGTCAATAAGTGCAAAAGAAGATGCTCAACATCATTAGCCACAAGAGAAATGCAAATCAAAACCACAATAAAATACTATGTCACACCCACCAGGATAGCTATAATAAAATAGGTAATGAGGTCGGGCGCGGTGGCTCAAGCCTGTAATCCCAGCACTTTGGGAGGCCGAGACGGGCGGATCACGAGGTCAGGAGATCGAGACCATCCTGGCTAACACAATGAAACCCCGT…	AAGATAGACAAAGAAAATAAAAGAAAAAAGAAAGAAAGAAAAAAAATTTAAGAAAAAGGGTAGAACATCCAGACTATCACAAAGAACTGCAACTTTAAAATGTCAAATAACCTAATTAAATAATGGACAAAAGTCTGAACAGACATTTCATCAGAGAAGATACACTAATGGTCAATAAGTGCAAAAGAAGATGCTCAACATCATTAGCCACAAGAGAAATGCAAATCAAAACCACAATAAAATACTATGTCACACCCACCAGGATAGCTATAATAAAATAGGTAATGAGGTCGGGCGCGGTGGCTCAAGCCTGTAATCCCAGCACTTTGGGAGGCCGAGACGGGCGGATCACGAGGTCAGGAGATCGAGACCATCCTGGCTAACACAATGAAACCCCGT…	ATGCTCAACATCATTAGCCACAAGAGAAATGCAAATCAAAACCACAATAAAATACTATGTCACACCCACCAGGATAGCTATAATAAAATAGGTAATGAGGCCGGGCGCGGTGGCTCAAGCCTGTAATCCCAGCACTTTGGGAGGCCGAGACGGGCGGATCACGAGGTCAGGAGATCGAGACCATCCTGGCTAACACAATGAAACCCCGTCTCTACTAAAAAATACAAAAAAACTAGCCGGGCGAGGTGGCGGGCGCCTGTAGTCCCAGCTACTCGGGAGGCTGAGGCAGGAGAATGGCGTAAACCCGGGAGGCGGAGCTTGCAGTGAGCCGAGATCGCGCCACTGCACTCCAGCCTGGGTGACAGAGCGAGACTCCGTCTCAAAAAAAAAAAAATAAAA…	ATGCTCAACATCATTAGCCACAAGAGAAATGCAAATCAAAACCACAATAAAATACTATGTCACACCCACCAGGATAGCTATAATAAAATAGGTAATGAGGCCGGGCGCGGTGGCTCAAGCCTGTAATCCCAGCACTTTGGGAGGCCGAGACGGGCGGATCACGAGGTCAGGAGATCGAGACCATCCTGGCTAACACAATGAAACCCCGTCTCTACTAAAAAATACAAAAAAACTAGCCGGGCGAGGTGGCGGGCGCCTGTAGTCCCAGCTACTCGGGAGGCTGAGGCAGGAGAATGGCGTAAACCCGGGAGGCGGAGCTTGCAGTGAGCCGAGATCGCGCCACTGCACTCCAGCCTGGGTGACAGAGCGAGACTCCGTCTCAAAAAAAAAAAAATAAAA…
50b06939-6039-4fd7-9392-d6b2ad9591f9	Chr1	111244700	111244685	ALU	Alu_YRb4	0	258	+	+	N	AAAAAATAAAATTGTG	Hippocampus.Single.WGS.ON22212.Neuron-#7|12,Hippocampus.Single.WGS.ON22213.Neuron-#23|1,Hippocampus.Single.WGS.ON22213.Neuron-#25|39,Hippocampus.Single.WGS.ON22213.Neuron-#31|1,Liver.Bulk.WGS.ON22212|16,Liver.Bulk.WGS.ON22213|16,Hippocampus.Single.RC-seq.ON22212.Neuron-#7|4,Hippocampus.Single.RC-seq.ON22213.Neuron-#23|2,Hippocampus.Single.RC-seq.ON22213.Neuron-#25|6,Hippocampus.Single.RC-seq.ON22…	Hippocampus.Single.WGS.ON22212.Neuron-#7|11,Hippocampus.Single.WGS.ON22213.Neuron-#15|5,Hippocampus.Single.WGS.ON22213.Neuron-#23|3,Hippocampus.Single.WGS.ON22213.Neuron-#25|39,Hippocampus.Single.WGS.ON22213.Neuron-#31|3,Liver.Bulk.WGS.ON22212|16,Liver.Bulk.WGS.ON22213|9,Hippocampus.Single.RC-seq.ON22212.Neuron-#7|4,Hippocampus.Single.RC-seq.ON22213.Neuron-#15|2,Hippocampus.Single.RC-seq.ON22213.…	TTAAAAATCCAAATGAAGACACAAAGAAGCAAATAAATAACATGTTATAATCCCATCACCAAAGGATAAACATCCTTAAGATTTTATTATAATCTAATATTGCCTTTGTGTTCATTTTATGCATATTTCCTTAAAAAATAAAATTGTGGCCGGGCGCGGTGGCTCACGCCTGTAATCCCAGCACTTTGGGAGGCCGAGGCGGGCGGATCACAAGGTCAGGAGATCGAGACCACGGTTCCTG	GAATGGCGTGAACCCGGGAGGCGGAGCTTGCAGTGAGCCGAGATCGCGCCACTGCACTCCAGCCTGGGCGACAGAGCGAGACTCCGTCTCAAAAAAAAAAAAAATAAAATAAAAAATAAAAAAAAATAAAATTGTGATCACTTTCTATTTAGTGTTTTGAAATCTGTTTTTCTTTTTGTTTTGAGACAAGGTCTTACTCTGTTGCCTATGCTGGAGTGCAGTGGTGCAATAACAGCGTACCGAGCCATTTTG	ATAATCCCATCACCAAAGGATAAACATCCTTAAGATTTTATTATAATCTAATATTGCCTTTGTGTTCATTTTATGCATATTTCCTTAAAAAATAAAATTGTGGCCGGGCGCGGTGGCTCACGCCTGTAATCCCAGCACTTTGGGAGGCCGAGGCGGGCGGATCACAAGGTCAGGAGATCGAGACCACGGTGAAACCCCGTCTCTACTAAAAATACAAAAAATTAGCCGGGCGCGGTGGGGGGCGCCTGTAGTCCCAGCTACTCGGGAGGCTGAGGCAGGAGAATGGCGTGAACCCGGGAGGCGGAGCTTGCAGTGAGCCGAGATCGCGCCACTGCACTCCAGCCTGGGCGACAGAGCGAGACTCCGTCTCAAAAAAAAAAAAAACTATAAAATAAAAAA…	ATAATCCCATCACCAAAGGATAAACATCCTTAAGATTTTATTATAATCTAATATTGCCTTTGTGTTCATTTTATGCATATTTCCTTAAAAAATAAAATTGTGGCCGGGCGCGGTGGCTCACGCCTGTAATCCCAGCACTTTGGGAGGCCGAGGCGGGCGGATCACAAGGTCAGGAGATCGAGACCACGGTGAAACCCCGTCTCTACTAAAAATACAAAAAATTAGCCGGGCGCGGTGGGGGGCGCCTGTAGTCCCAGCTACTCGGGAGGCTGAGGCAGGAGAATGGCGTGAACCCGGGAGGCGGAGCTTGCAGTGAGCCGAGATCGCGCCACTGCACTCCAGCCTGGGCGACAGAGCGAGACTCCGTCTCAAAAAAAAAAAAAACTATAAAATAAAAAA…
c7c645da-dcff-4168-ad09-9676aed70d60	Chr1	112792702	112792711	ALU	Alu_YRa4	0	269	-	-	N	ACATTCTCTT	Hippocampus.Single.WGS.ON22212.Neuron-#16|46,Hippocampus.Single.WGS.ON22212.Neuron-#37|1,Hippocampus.Single.WGS.ON22212.Neuron-#7|6,Liver.Bulk.WGS.ON22212|15,Hippocampus.Single.RC-seq.ON22212.Neuron-#16|26,Hippocampus.Single.RC-seq.ON22212.Neuron-#19|1,Hippocampus.Single.RC-seq.ON22212.Neuron-#37|1,Hippocampus.Single.RC-seq.ON22212.Neuron-#7|1	Hippocampus.Single.WGS.ON22212.Neuron-#16|32,Hippocampus.Single.WGS.ON22212.Neuron-#37|2,Hippocampus.Single.WGS.ON22212.Neuron-#7|3,Liver.Bulk.WGS.ON22212|15,Hippocampus.Single.RC-seq.ON22212.Neuron-#16|35,Hippocampus.Single.RC-seq.ON22212.Neuron-#19|1,Hippocampus.Single.RC-seq.ON22212.Neuron-#7|1,Hippocampus.Single.RC-seq.ON22213.Neuron-#23|1	TAGTGGAGACGGGGTTTCATTGTGTTAGCCAGGATGGTCTCGATCTCCTGACCTCGTGATCCGCCCGTCTCGGCCTCCCAAAGTGCTGGGATTACAGGCTTGAGCCACCGCGCCCGGCCAACATTCTCTTGTCCTGTGGACTGTCATTAGTGAGATGTTATGTTACATGTCTGAGCTGGAAGCCACCCCAAT	CATGTGAGACTGTCAGACAAAAGCTCCAGTGGCTCAGATACTGCATCTCTCTCTCTTTGGAAAGACGCATAGTCCCCAGAGCAAATGTCTGAATGTTCTCAAGCAAATGTCTGAATGTCTCATCAGGGCATCTTGACATTCTCTTTTTTTTTTTTTGAGGCGGAGTCTCGCTAAGTAG	AGTTTCTTCATCTATAAAATGTGGGAGTTGAAATAGAAGATCCCTAATGTGGCTTCCAGCTCAGACATGTAACATAACATCTCACTAATGACAGTCCACAGGACAAGAGAATGTTGGCCGGGCGCGGTGGCTCAAGCCTGTAATCCCAAAGGCACTTTGGGAGGCCGAGACGGGCGGATCACGAGGTCAGGAGATCGAGACCATCCTGGCTAACACAATGAAACCCCGTCTCCACTAAAAATACAAAAAAATTAGCCGGGCGTGGTGGCGGCGCCTGTAGTCCCAGCTACTCGGGAGGCTGAGGCAGGAGAATGGCGGGAACCCAGGAGGCGGAGCTTGCAGTGAGCCGAGATCGCGCCACTGCACTCCAGCCTGGGCGACAGAGCGAGACTCCGCCTC…	AGTTTCTTCATCTATAAAATGTGGGAGTTGAAATAGAAGATCCCTAATGTGGCTTCCAGCTCAGACATGTAACATAACATCTCACTAATGACAGTCCACAGGACAAGAGAATGTTGGCCGGGCGCGGTGGCTCAAGCCTGTAATCCCAAAGGCACTTTGGGAGGCCGAGACGGGCGGATCACGAGGTCAGGAGATCGAGACCATCCTGGCTAACACAATGAAACCCCGTCTCCACTAAAAATACAAAAAAATTAGCCGGGCGTGGTGGCGGCGCCTGTAGTCCCAGCTACTCGGGAGGCTGAGGCAGGAGAATGGCGGGAACCCAGGAGGCGGAGCTTGCAGTGAGCCGAGATCGCGCCACTGCACTCCAGCCTGGGCGACAGAGCGAGACTCCGCCTC…
198a43cb-339a-4189-89b9-23f43d507925	Chr1	113774422	113774414	ALU	Alu_YRa4	0	269	+	+	N	AAAAATACA	Hippocampus.Single.WGS.ON22213.Neuron-#71|5,Hippocampus.Single.WGS.ON22213.Neuron-#39|6,Liver.Bulk.WGS.ON22213|17,Hippocampus.Single.RC-seq.ON22213.Neuron-#71|1,Hippocampus.Single.RC-seq.ON22213.Neuron-#25|4,Hippocampus.Single.RC-seq.ON22213.Neuron-#39|7	Hippocampus.Single.WGS.ON22213.Neuron-#14|1,Hippocampus.Single.WGS.ON22213.Neuron-#71|12,Hippocampus.Single.WGS.ON22213.Neuron-#31|1,Hippocampus.Single.WGS.ON22213.Neuron-#39|12,Liver.Bulk.WGS.ON22213|14,Hippocampus.Single.RC-seq.ON22213.Neuron-#14|2,Hippocampus.Single.RC-seq.ON22213.Neuron-#71|1,Hippocampus.Single.RC-seq.ON22213.Neuron-#25|3,Hippocampus.Single.RC-seq.ON22213.Neuron-#39|6	AAAAAAAAAAGTCATTCCTGGCCGTGCACGGTGACTCATGCTTGTATTTCTAGCACTTTGGGAGGCTGAGGCAGGTGGACTGCTTGAGTCGAGGAGTTCAAGACCGGCCTGGGTGACATAGTGAAACTCTGTCTCTGATAAAAATACAGGCCGGGCGCGGTGGGGCCTTCAAGCCTGTAATCCCCGCACTTTTGGAGGCCGAGACGGGCGGATCACGAGGTCAGGAGATCGAGACCATCCTGGCTAACACAATGAAACCCCGTCTCCACTA	GGCTGTGGTTGGATAATGGCGGGAACCCGGGTGGGGGCGCTTGCAGTGAGCCGTTATCGCGCCACTGCACTCCACCCTGGGCTAAAGAGCGAGACCCCGCCACAAAAAAAAAAAAAAAAAAAAAATACAAAAATTACCCAGTGTGGCACACACCTATAGTCGTGCTTCCCAGATACTTGGGAAGTTGAGACAGGAGGATCACTTAAGCCCTGAAGGTGGAGGTTGCAGTGAGCTGAGATTGTATTTAACACTGCATTCCAGTCTGGGTGACA	ACTCATGCTTGTATTTCTAGCACTTTGGGAGGCTGAGGCAGGTGGACTGCTTGAGTCGAGGAGTTCAAGACCGGCCTGGGTGACATAGTGAAACTCTGTCTCTGATAAAAATACAGGCCGGGCGCGGTGGCTCAAGCCTGTAATCCCAGCACTTTGGGAGGCCGAGACGGGCGGATCACGAGGTCAGGAGATCGAGACCATCCTGGCTAACACAATGAAACCCCGTCTCCACTAAAAATACAAAAAAATTAGCCGGGCGTGGTGGCGGCGCCTGTAGTCCCAGCTACTCGGGAGGCTGAGGTAGGAGAATGGCGGGAACCCGGGAGGCGGAGCTTGCAGTGAGCCGAGATCGCGCCACTGCACTCCAGCCTGGGCGACAGAGCGAGACTCCGCCTCAAA…	ACTCATGCTTGTATTTCTAGCACTTTGGGAGGCTGAGGCAGGTGGACTGCTTGAGTCGAGGAGTTCAAGACCGGCCTGGGTGACATAGTGAAACTCTGTCTCTGATAAAAATACAGGCCGGGCGCGGTGGCTCAAGCCTGTAATCCCAGCACTTTGGGAGGCCGAGACGGGCGGATCACGAGGTCAGGAGATCGAGACCATCCTGGCTAACACAATGAAACCCCGTCTCCACTAAAAATACAAAAAAATTAGCCGGGCGTGGTGGCGGCGCCTGTAGTCCCAGCTACTCGGGAGGCTGAGGTAGGAGAATGGCGGGAACCCGGGAGGCGGAGCTTGCAGTGAGCCGAGATCGCGCCACTGCACTCCAGCCTGGGCGACAGAGCGAGACTCCGCCTCAAA…
e4e3a959-979e-4564-a8c6-813ad10ad171	Chr1	114927093	114927078	ALU	Alu_YRb4	0	257	+	+	N	AAGATTTAAAGCAGAC	Hippocampus.Single.WGS.ON22212.Neuron-#16|8,Hippocampus.Single.WGS.ON22212.Neuron-#19|4,Hippocampus.Single.WGS.ON22212.Neuron-#7|4,Liver.Bulk.WGS.ON22212|20,Hippocampus.Single.RC-seq.ON22212.Neuron-#16|4,Hippocampus.Single.RC-seq.ON22212.Neuron-#19|1,Hippocampus.Single.RC-seq.ON22212.Neuron-#7|4	Hippocampus.Single.WGS.ON22212.Neuron-#16|7,Hippocampus.Single.WGS.ON22212.Neuron-#7|10,Liver.Bulk.WGS.ON22212|11,Hippocampus.Single.RC-seq.ON22212.Neuron-#16|6,Hippocampus.Single.RC-seq.ON22212.Neuron-#19|2,Hippocampus.Single.RC-seq.ON22212.Neuron-#7|3	CATCTGTACACATGAAGCTAACATTCTATTCCTATAGTGCTGCTCTAAAGCATGTCACTGCAAAACTTAAGCCTTCAAGTAAAATGATTAGATTTGCATTTTAGAAAGATTATATGCCCTGGTGAGACTGGGTTAAGATTTAAAGCAGACGGCCGGGCGCGGTGGCTCACGCCTGTAATCCCAGCACTTTGGGAGGCCGAGGCGGGCGGATCACAAGGGTTCAGGAGATCGGGAACCCACGGTGAAACCCCGGTCTTCTCT	GTTTACCCGGGGTGGGGTGGTTTGATTTTGCCGTTTTTGGGCCACTGCAAACCACCCTGGGGGAAAGTTGTATACACCAAAAAAAAAAAAAAAAAAAAAAAAAAAAAAAAAAAGATTTAAAGCAGACATAAAGCTATTCCAGCTGCTGGGGCAAACAACGAAAAGGACCTGTTTTAAAACATGTACAGTAAAGGTTATGAGGAAATAACAGCTTTAGGCTGGGCATGGTGACTCATGCCTTTGTAATCCCAGCA	GCTCTAAAGCATGTCACTGCAAAACTTAAGCCTTCAAGTAAAATGATTAGATTTGCATTTTAGAAAGATTATATGCCCTGGTGAGACTGGGTTAAGATTTAAAGCAGACGGCCGGGCGCGGTGGCTCACGCCTGTAATCCCAGCACTTTGGGAGGCCGAGGCGGGCGGATCACAAGGTCAGGAGATCGAGACCACGGTGAAACCCCGTCTCTACTAAAAATACAAAAAATTAGCCGGGCGCGGTTGTGGGCGCCTGTAGTCCCAGCTACTCGGGAGGCTGAGGCAGGAGAATGGCGTGAACCCGGGAGGCGGAGCTTGCAGTGAGCCGAGATTGCGCCACTGCACTCCAGCCTGGGCGACAGAGCTAGACTCCATCTCAAAAAAAAAAAAAAAATAAAA…	GCTCTAAAGCATGTCACTGCAAAACTTAAGCCTTCAAGTAAAATGATTAGATTTGCATTTTAGAAAGATTATATGCCCTGGTGAGACTGGGTTAAGATTTAAAGCAGACGGCCGGGCGCGGTGGCTCACGCCTGTAATCCCAGCACTTTGGGAGGCCGAGGCGGGCGGATCACAAGGTCAGGAGATCGAGACCACGGTGAAACCCCGTCTCTACTAAAAATACAAAAAATTAGCCGGGCGCGGTTGTGGGCGCCTGTAGTCCCAGCTACTCGGGAGGCTGAGGCAGGAGAATGGCGTGAACCCGGGAGGCGGAGCTTGCAGTGAGCCGAGATTGCGCCACTGCACTCCAGCCTGGGCGACAGAGCTAGACTCCATCTCAAAAAAAAAAAAAAAATAAAA…
6d15344e-f8d7-4d38-9590-031915f7814f	Chr1	114990370	114990357	ALU	Alu_YRb4	0	257	+	+	N	AAAAAATATTTTTA	Hippocampus.Single.WGS.ON22212.Neuron-#19|5,Hippocampus.Single.WGS.ON22212.Neuron-#21|20,Hippocampus.Single.WGS.ON22212.Neuron-#7|5,Liver.Bulk.WGS.ON22212|10,Hippocampus.Single.RC-seq.ON22212.Neuron-#19|1,Hippocampus.Single.RC-seq.ON22212.Neuron-#7|2	Hippocampus.Single.WGS.ON22212.Neuron-#19|8,Hippocampus.Single.WGS.ON22212.Neuron-#21|11,Hippocampus.Single.WGS.ON22212.Neuron-#7|9,Liver.Bulk.WGS.ON22212|11,Hippocampus.Single.RC-seq.ON22212.Neuron-#21|2,Hippocampus.Single.RC-seq.ON22212.Neuron-#7|3	TTTTTTTTTTTAAAAAAAGGTGATACCACTGGTCCTAGAGAACATGCCCAATCTCTGATTTATTCTATTGAATACTCCAGAAGGCAGATGCCTGATGATCTAATAGTCTAAATTAGAGAAATATCTCCAAAATAAAAAATATTTTTAGGCCGGGCGTGGTGGCTCAAGCCTGTAATCCCAGCACTTTGGGAGCGGCCGAGGCGAGGGGCGGATCACAAGGTCAGGAGATCGAGACCACAGTGAAACCCCGTCTCTACTAAAAAAAAAT	AGGCTGAGGCAGGTTACTGGCGGGAACCCGGGAGGCGGAGCTTGCAGTGAGCCGATATCGCGCAACTGCACTCAAGCCTGGGAAACAGCTTGATACACCGTATCAAAAAAAAAAAAAAAAAAAAAATATTTTTATAAAATATAAATCTATATATATTTAGAGATAGTGTCTTACTCTGTTGCCCAGGCTTGAGTGCAGTGGTGTGATCACAGCTCACTACAGCCTCAACATCCTGGGCTCAAGTGATTCTCCCTCCTCAGCCTC	ATACTCCAGAAGGCAGAAGCCTGATGATCTAATAGTCTAAATTAGAGAAATATCTCCAAAATAAAAAATATTTTTAGGCCGGGCGTGGTGGCTCAAGCCTGTAATCCCAGCACTTTGGGAGGCCGAGGCGGGCGGATCACAAGGTCAGGAGATCGAGACCACAGTGAAACCCCGTCTCTACTAAAAAAAAATACAAAAAATTAGCCGGGCGCGGTGGCGGGCGCCTAGTAGTCCCAGCTACTCAGGAGGCTGAGGCAGGAGAATGGCGCGATCTCGGCTCAC	ATACTCCAGAAGGCAGAAGCCTGATGATCTAATAGTCTAAATTAGAGAAATATCTCCAAAATAAAAAATATTTTTAGGCCGGGCGTGGTGGCTCAAGCCTGTAATCCCAGCACTTTGGGAGGCCGAGGCGGGCGGATCACAAGGTCAGGAGATCGAGACCACAGTGAAACCCCGTCTCTACTAAAAAAAAATACAAAAAATTAGCCGGGCGCGGTGGCGGGCGCCTAGTAGTCCCAGCTACTCAGGAGGCTGAGGCAGGAGAATGGCGCGATCTCGGCTCAC
2b3556c1-68ae-4ffd-9cd9-5b1920953d79	Chr1	115514349	115514332	ALU	Alu_YRb4	0	257	+	+	N	TAAAAACTACCATTTATT	Hippocampus.Single.WGS.ON22212.Neuron-#16|11,Hippocampus.Single.WGS.ON22212.Neuron-#17|14,Hippocampus.Single.WGS.ON22212.Neuron-#21|1,Hippocampus.Single.WGS.ON22212.Neuron-#7|10,Liver.Bulk.WGS.ON22212|12,Hippocampus.Single.RC-seq.ON22212.Neuron-#16|6,Hippocampus.Single.RC-seq.ON22212.Neuron-#17|7	Hippocampus.Single.WGS.ON22212.Neuron-#16|7,Hippocampus.Single.WGS.ON22212.Neuron-#17|11,Hippocampus.Single.WGS.ON22212.Neuron-#21|2,Liver.Bulk.WGS.ON22212|13,Hippocampus.Single.RC-seq.ON22212.Neuron-#16|2,Hippocampus.Single.RC-seq.ON22212.Neuron-#17|4,Hippocampus.Single.RC-seq.ON22212.Neuron-#19|1	TAGAGAATCAACGAGGAAGTGTATTATGAGGACCAAGGTTAAAATGCGAATATCTTAGAAGTAGCACATTAAAATGTTAATAATTGGTACATAATAGAATGTAACATGAGCTTAAACTGAATATGAATTAAAAACTACCATTTATTGGGCCGGGCGCGGTGGCTCACGCCTGTAATCCCAGCACTTTGGGAGGCCGAGGCGGGAGGATCACAAGGTCAGGAGATCGAGACCACAGTGAAACCCCGTCTCTACTAAAAATACAAAAGAAA	AGAAGAGGGGGGGCAGACATTGGGAAGAGGCGAACCCCCGCCACCCCACCCAAGGCAGGACAAAAAGGCAAAAACACAAAAAAAAAAAAAAAAAAAAAAAAAAAAAAAAAAAAAAAAAAAATAAAAACTACCATTTATTAAGTAGTTGTTATGAGCCTATTATTGTGTCCAATAATTTACATTCTCAATTTTAATCCTTATGTTCTTTTATGAGGGATTATTGTTTACTCCAATTTTCAGATGAGGAAACCAAGGCTTAGAGAGAATTTA	GACCAAGGTTAAAATGCGAATATCTTAGAAGTAGCACATTAAAATGTTAATAATTGGTACATAATAGAATGTAACATGAGCTTAAACTGAATATGAATTAAAAACTACCATTTATTGGGCCGGGCGCGGTGGCTCACGCCTGTAATCCCAGCACTTTGGGAGGCCGAGGCGGGAGGATCACAAGGTCAGGAGATCGAGACCACAGTGAAACCCCGTCTCTACTAAAAATACAAAAGAAAAATTAGCCGGGCGCGGTTGTGGGCGCCTGTAGTCCCAGCTACTCGGGAGGCTGAGGCAGGAGAATGGCGTGAACCCGGGAGGCGGAGCTTGCAGTGAGCCGAGATCGCGCCACTGCACTCCAGCCTGGGCGACAGAGCGAGACTCCGTCTCAAAAAAAAA…	GACCAAGGTTAAAATGCGAATATCTTAGAAGTAGCACATTAAAATGTTAATAATTGGTACATAATAGAATGTAACATGAGCTTAAACTGAATATGAATTAAAAACTACCATTTATTGGGCCGGGCGCGGTGGCTCACGCCTGTAATCCCAGCACTTTGGGAGGCCGAGGCGGGAGGATCACAAGGTCAGGAGATCGAGACCACAGTGAAACCCCGTCTCTACTAAAAATACAAAAGAAAAATTAGCCGGGCGCGGTTGTGGGCGCCTGTAGTCCCAGCTACTCGGGAGGCTGAGGCAGGAGAATGGCGTGAACCCGGGAGGCGGAGCTTGCAGTGAGCCGAGATCGCGCCACTGCACTCCAGCCTGGGCGACAGAGCGAGACTCCGTCTCAAAAAAAAA…
e55148c9-b756-40ae-b156-1bb61591dfee	Chr1	116206883	116206896	ALU	Alu_YRb4	0	258	-	-	N	GACTTTTGGGTTTT	Hippocampus.Single.WGS.ON22212.Neuron-#16|34,Hippocampus.Single.WGS.ON22212.Neuron-#19|25,Hippocampus.Single.WGS.ON22212.Neuron-#21|7,Hippocampus.Single.WGS.ON22212.Neuron-#7|5,Liver.Bulk.WGS.ON22212|12,Hippocampus.Single.RC-seq.ON22212.Neuron-#16|14,Hippocampus.Single.RC-seq.ON22212.Neuron-#21|1,Hippocampus.Single.RC-seq.ON22212.Neuron-#7|4	Hippocampus.Single.WGS.ON22212.Neuron-#16|20,Hippocampus.Single.WGS.ON22212.Neuron-#19|20,Hippocampus.Single.WGS.ON22213.Neuron-#38|1,Liver.Bulk.WGS.ON22212|14,Hippocampus.Single.RC-seq.ON22212.Neuron-#16|14,Hippocampus.Single.RC-seq.ON22212.Neuron-#19|2,Hippocampus.Single.RC-seq.ON22212.Neuron-#7|3	AATTTTTTGTATTTTTAGTAGAGACGGGGTTTCACCGTGGTCTCGATCTCCTGACCTTGTGATCCGCCCGCCTCGGCCTCCCAAAGTGCTGGGATTACAGGCGTGAGCCACCGCGCCCGGCGACTTTTGGGTTTTATGTTTTGTTGAAAGAGTACTTCCACATCTCACAGTATAAAATATTATATATTTTCTTGTAGCCTCA	TTCAACAAAACATAAAACCCAAAAGTCGCCGGGCGCGGTGGCTCACGCCTGTAATCCCAGCACTTTGGGAGGCCGAGGCGGGCGGATCACAAGGTCAGGAGATCGAGACCACGGTGAAACCCCGTCTCTACTAAAAATACAAAAAATTAGCCGGGCGCGGTTGTGGGCGCCTGTAGTCCCAGCTACTCGGGAGGCTGAGGCAGGAGAATGGCGTGAACCCGGGAGGCGGAGCTTGCAGTGAGCCGAGATCGCGCCACTGCACTCCAGCCTGGGCGACAGAGCGAGACTCCGTCTCAAAAAAAAAAAAAAAAAAAAAAAACCCAAAAGTCATTAAAAATATATATATATAGAGAGAGATTTCACTATTTAACTAGAATTCTATATGGCAAAAGACACTAT…	ATTCTTGTATATGATGTGAGATGGGGAAGTACTCTTTCAACAAAACATAAAACCCAAAAGTCGCCGGGCGCGGTGGCTCACGCCTGTAATCCCAGCACTTTGGGAGGCCGAGGCGGGCGGATCACAAGGTCAGGAGATCGAGACCACGGTGAAACCCCGTCTCTACTAAAAATACAAAAAATTAGCCGGGCGCGGTTGTGGGCGCCTGTAGTCCCAGCTACTCGGGAGGCTGAGGCAGGAGAATGGCTGTGAACCCGGGAGGCGGAGCTTGCAGTGAGCCGAGATCGCGCCACTGCACTCCAGGACCCTGGGCGACAGAGCGAGACTCCGTCTCAAAAAAAAAAAAAAAAAAAAAAAAAACCAAAAAGACAAAAAAAAAATATATATATATAGAGAGAT…	ATTCTTGTATATGATGTGAGATGGGGAAGTACTCTTTCAACAAAACATAAAACCCAAAAGTCGCCGGGCGCGGTGGCTCACGCCTGTAATCCCAGCACTTTGGGAGGCCGAGGCGGGCGGATCACAAGGTCAGGAGATCGAGACCACGGTGAAACCCCGTCTCTACTAAAAATACAAAAAATTAGCCGGGCGCGGTTGTGGGCGCCTGTAGTCCCAGCTACTCGGGAGGCTGAGGCAGGAGAATGGCTGTGAACCCGGGAGGCGGAGCTTGCAGTGAGCCGAGATCGCGCCACTGCACTCCAGGACCCTGGGCGACAGAGCGAGACTCCGTCTCAAAAAAAAAAAAAAAAAAAAAAAAAACCAAAAAGACAAAAAAAAAATATATATATATAGAGAGAT…
ec87f9ff-3739-4fb2-b15a-c503f1acf78c	Chr1	116635129	116635139	ALU	Alu_YRa4	0	270	-	-	N	TCATTTTATTT	Hippocampus.Single.WGS.ON22213.Neuron-#25|29,Liver.Bulk.WGS.ON22213|12,Hippocampus.Single.RC-seq.ON22213.Neuron-#25|5,Hippocampus.Single.RC-seq.ON22213.Neuron-#39|1	Hippocampus.Single.WGS.ON22213.Neuron-#23|1,Hippocampus.Single.WGS.ON22213.Neuron-#25|23,Liver.Bulk.WGS.ON22213|18,Hippocampus.Single.RC-seq.ON22213.Neuron-#25|3	ACTATAATCCTCCATCCACACAAAATAGAGATTTTTAGTACAGTGACACAGTAAATAAAAATTATATTGATGAGTGAAACAAGTCACTAAAAAACTGATATTATATATCTTAAAAAATCAATGTGAAAATTAATTCCTTGCATCATAGGCTTATGTGTAATTTAAAAAGTATAAAATTGCCTGTGAGAATTATTTAGTATCACATGAAAATTATTACCCACTTCTTATTAGCATATTTTCTTTCTGTAAGCACACCCATTTCACATGACTTAATTAAAATAAAATGAGGCCGGGCGCGGTGGCTCAAGCCTGTAATCCCAGCACTTTGGGAGGCCGAGACGGGCGGATCATGAGGTCAGGAGATCGAGACCATCCTGGCTAACACAGTGAAACCCCGTC…	ACTATAATCCTCCATCCACACAAAATAGAGATTTTTAGTACAGTGACACAGTAAATAAAAATTATATTGATGAGTGAAACAAGTCACTAAAAAACTGATATTATATATCTTAAAAAATCAATGTGAAAATTAATTCCTTGCATCATAGGCTTATGTGTAATTTAAAAAGTATAAAATTGCCTGTGAGAATTATTTAGTATCACATGAAAATTATTACCCACTTCTTATTAGCATATTTTCTTTCTGTAAGCACACCCATTTCACATGACTTAATTAAAATAAAATGAGGCCGGGCGCGGTGGCTCAAGCCTGTAATCCCAGCACTTTGGGAGGCCGAGACGGGCGGATCATGAGGTCAGGAGATCGAGACCATCCTGGCTAACACAGTGAAACCCCGTC…	AAATGAGGCCGGGCGCGGTGGCTCAAGCCTGTAATCCCAGCACTTTGGGAGGCCGAGACGGGCGGATCATGAGGTCAGGAGATCGAGACCATCCTGGCTAACACAGTGAAACCCCGTCTCTACTAAAATACAAAAAAAAAACTAGCCGTGCGAGGTGGCGGGCGCCTGTAGTCCCAGCTACTCGGGAGGCTGAGGCAGGAGAATGGCGTGAACCCGGGAGGCGGAGCTTGCAGTGAGCTGAGATCCGGCCACTGCACTCCAGCCTGGGCGACAGAGCGAGACTCCGTCTCAAAAAAATAAATAAATAAAAAAATATAAATATGAAACCATCTTCCTTGGGAAAAATAATACATATATCTAACAAAAAG	AAATGAGGCCGGGCGCGGTGGCTCAAGCCTGTAATCCCAGCACTTTGGGAGGCCGAGACGGGCGGATCATGAGGTCAGGAGATCGAGACCATCCTGGCTAACACAGTGAAACCCCGTCTCTACTAAAATACAAAAAAAAAACTAGCCGTGCGAGGTGGCGGGCGCCTGTAGTCCCAGCTACTCGGGAGGCTGAGGCAGGAGAATGGCGTGAACCCGGGAGGCGGAGCTTGCAGTGAGCTGAGATCCGGCCACTGCACTCCAGCCTGGGCGACAGAGCGAGACTCCGTCTCAAAAAAATAAATAAATAAAAAAATATAAATATGAAACCATCTTCCTTGGGAAAAATAATACATATATCTAACAAAAAG
38713d3f-7a7a-4a0a-b38e-35ce7f9d3c5e	Chr1	117550199	117550180	ALU	Alu_YRa4	0	270	+	+	N	AATAATAATAATAATATTAA	Hippocampus.Single.WGS.ON22212.Neuron-#7|8,Hippocampus.Single.WGS.ON22213.Neuron-#69|50,Hippocampus.Single.WGS.ON22213.Neuron-#25|6,Liver.Bulk.WGS.ON22212|8,Liver.Bulk.WGS.ON22213|10,Hippocampus.Single.RC-seq.ON22212.Neuron-#16|1,Hippocampus.Single.RC-seq.ON22212.Neuron-#7|3,Hippocampus.Single.RC-seq.ON22213.Neuron-#69|13,Hippocampus.Single.RC-seq.ON22213.Neuron-#25|2	Hippocampus.Single.WGS.ON22212.Neuron-#7|13,Hippocampus.Single.WGS.ON22213.Neuron-#14|2,Hippocampus.Single.WGS.ON22213.Neuron-#69|37,Hippocampus.Single.WGS.ON22213.Neuron-#25|3,Hippocampus.Single.WGS.ON22213.Neuron-#52|1,Liver.Bulk.WGS.ON22212|12,Liver.Bulk.WGS.ON22213|7,Hippocampus.Single.RC-seq.ON22213.Neuron-#69|2	CACGCCTGTAATCCCAGCTACATGGGAAGCTGAGGCAGGAGAATCGTTTGAACCCGGGAGGTGGAGGTTGCAGGGAGCCGAGATTGTGCCACTGCACTCCAGCCTGGGTGAGAGAGTGACACTCCATTTCAAATAATAATAATAATATTAAGGCCGGGCGCTGGTGGCTCAAGCCTGTAATCCCAGCACTTTGGGAGGCCGAGACGGGCGGATCACGAGGTCAGGAGATCGAAACCATCGCCCT	CGGGAGGCGGAGCTTGCAGTGAGCTGAGATCCGGCCACTGCACTCCAGCCTGGGCGACAGAGCGAGACTCTGTCTCAAAAAAAAAAAATAAAAAAAATAAAATAAAATAAAATAAAAATAATAATAATAATAATATTAAAAATAAAAATAAAAACAACAAAGTGTAATTTCTTAACTGAAAAGATTCTTCAGATTGTATTCCCCAAATAGTACATATTTTCATTTTCCTGTTGTAGTATGTATAATTTATCTTTCAGAATGGAGGAAT	TGCACCCGGGAGGTGGAGGTGGCAGGGAGCCGAGATTGTGCCACTGCACTCCAGCCTGGGTGAGAGAGTGACACTCCATTTCAAATAATAATAATAAGATTAAGGCCGGGCGCGGTGGCTCAAGCCTGTAATCCCAGCACTTTGGGAGGCCGAGACGGGCGGATCACGAGGTCAGGAGATCGAAACCATCCTGGCTAACACGGTGAAACCCCGTCTCTATTAAGAAATACAAAAAACTAGCCGGGCGAGGTGGCGGGTGCCTGTAGTCCCAGCTACTCGGGAGGCTGAGGCCAGAGACTGGCGTGAACCCGGGAGGCGGAGCTTGCAGTGAGCTGAGATCCGGCCACTGCACTCCAGCCTGGGCGACAGAGCGAGACTCTGTCTCAAAAAAAAAAATAT…	TGCACCCGGGAGGTGGAGGTGGCAGGGAGCCGAGATTGTGCCACTGCACTCCAGCCTGGGTGAGAGAGTGACACTCCATTTCAAATAATAATAATAAGATTAAGGCCGGGCGCGGTGGCTCAAGCCTGTAATCCCAGCACTTTGGGAGGCCGAGACGGGCGGATCACGAGGTCAGGAGATCGAAACCATCCTGGCTAACACGGTGAAACCCCGTCTCTATTAAGAAATACAAAAAACTAGCCGGGCGAGGTGGCGGGTGCCTGTAGTCCCAGCTACTCGGGAGGCTGAGGCCAGAGACTGGCGTGAACCCGGGAGGCGGAGCTTGCAGTGAGCTGAGATCCGGCCACTGCACTCCAGCCTGGGCGACAGAGCGAGACTCTGTCTCAAAAAAAAAAATAT…
9a02da4c-b09f-4f00-8150-ca4b8888299b	Chr1	117804051	117804038	ALU	Alu_YRb4	0	258	+	+	N	CAAAATTGCAAATC	Hippocampus.Single.WGS.ON22212.Neuron-#10|1,Hippocampus.Single.WGS.ON22212.Neuron-#16|2,Hippocampus.Single.WGS.ON22212.Neuron-#19|5,Liver.Bulk.WGS.ON22212|22,Hippocampus.Single.RC-seq.ON22212.Neuron-#19|2	Hippocampus.Single.WGS.ON22212.Neuron-#19|3,Liver.Bulk.WGS.ON22212|18,Hippocampus.Single.RC-seq.ON22212.Neuron-#16|1,Hippocampus.Single.RC-seq.ON22212.Neuron-#19|2	ACTGGTGTTTTATTTAATTTTATATTTTGGTTTTGATTTTATTTGAGTTATTGAGTGATTAATGAAGCACACATTATTCTCTTTTTTGCTGTTGACCTGTGGTCATATCTTTATGACTATTAATATAATTCAAAATTGCAAATCGGCCGGGCGCGGTGGCTCAAGCCTGTAATCCCAGCACTTTGGGAGGCCGAGACGGGCGGATCACAAGGTCAGGACGCCTCC	CGGCAGGAGAATGGCTTGAACCCGGGAGGCGGAGCTTGCCGTGAGCTGAGATCTGGCCACTGCCCTCCAGCCTGGGCGACAGCGCGAGACTCCGTCTCAAAAAAAAAAAAAAAAAAAAAACAAAATTGCAAATCATCCCTTTATACATTATATTCATTTTCCTTTTGATTAAGAATCAAGTAATGTTTAAAAATCTTATAATGAGGCTGAAGAATTGAGTATACTGGTTTTGAACTAGTTTCATGTTTAGCCTGTTCTTGTTGAT	ATTTTATTTGAGTTATTGAGTGATTAATGAAGCACACATTATTCTCTTTTTTGCTGTTGACCTGTGGTCATATCTTTATGACTATTACTATAATTCAAAATTGCAAATCGGCCGGGCGCGGTGGCTCAAGCCTGTAATCCCAGCACTTTGGGAGGCCGAGACGGGCGGATCACAAGGTCAGGAGATCGAGACCATCCTGGCTAACACGGCGAAACCCTGTCTCTACTAAAAACACACACACACAAAAAAAAATTAGCCGGGCGAGGTGGCGGCGCCTGTGGTCCCAGCTACTCGGG	GTCAGGAGATCGAGACCATCCTGGTGAACACAGTGAAACCCCGTCTCTACTAAAACTACAAAAAACTAGCCGGGCGAGGTGGCGGGCGCCTGTAGTCCCAGCTACTCGGGAGGCTGAGGCAGGAGAATGGCGTGAACCCGGGAGGCGGAGCTTGCAGTGAGCCGAGATCACGCCACTGCACTCCAGCCTGGGCTGGGACAGAGCGAGACTCCGTCTCAAAAAAAAAAAAAAAAAAACAAAATTGCAAATCATCCCTTTATACATTATATTCATTTTCCTTTTGATTAAGAATCAAGTAATGTTTAAAAATCTTATAATGAGGCTGAAGAATTGAGTATACT
856f6db4-5d11-447a-9d37-9892b0becb67	Chr1	118125278	118125286	ALU	Alu_YRb4	0	258	+	+	N	AAATAGTAG	Hippocampus.Single.WGS.ON22213.Neuron-#39|4,Liver.Bulk.WGS.ON22213|11,Hippocampus.Single.RC-seq.ON22213.Neuron-#38|1,Hippocampus.Single.RC-seq.ON22213.Neuron-#39|1	Hippocampus.Single.WGS.ON22213.Neuron-#38|1,Hippocampus.Single.WGS.ON22213.Neuron-#39|7,Liver.Bulk.WGS.ON22213|10	AATAAAACCAAGGCTCTGTACAAGCAATAATATTTTGTTCACTCGTTGAAAACATGAACAAATTTGCACCTTAAAAGGTCAGAAAGAACTGAGCTCTAATCTTTCCTTTGCCAAAGAGTACGCTATAATCGCTAATACGTTACTTTATTTTAATTTAACTGGGAAAATAATAATCACCTCACAGAAGTTTGAGAAATATTAAATGAAATATCACCTATAAAGTGACTATCATCTGAAAATTAAAGCACTCAATAAATAGTAGCTTATAGGCCGGGCGCGGTGGCTCAAGCCTGTAATCCCAGCACTTTGGGAGGCCGAGACGGGCGGATCACGAGGTCAGGAGATCGAGACCATCCTGGCTAACACAATGAAACCCCGTCTCTACTAAAAAATACAAAA…	AATAAAACCAAGGCTCTGTACAAGCAATAATATTTTGTTCACTCGTTGAAAACATGAACAAATTTGCACCTTAAAAGGTCAGAAAGAACTGAGCTCTAATCTTTCCTTTGCCAAAGAGTACGCTATAATCGCTAATACGTTACTTTATTTTAATTTAACTGGGAAAATAATAATCACCTCACAGAAGTTTGAGAAATATTAAATGAAATATCACCTATAAAGTGACTATCATCTGAAAATTAAAGCACTCAATAAATAGTAGCTTATAGGCCGGGCGCGGTGGCTCAAGCCTGTAATCCCAGCACTTTGGGAGGCCGAGACGGGCGGATCACGAGGTCAGGAGATCGAGACCATCCTGGCTAACACAATGAAACCCCGTCTCTACTAAAAAATACAAAA…	CTGGGAAAATAATAATCACCTCACAGAAGTTTGAGAAATATTAAATGAAATATCACCTATAAAGTGACTATCATCTGAAAATTATAGCACTCAATAAATAGTAGCTTATAGGCCGGGCGCGGTGGCTCAAGCCTGTAATCCCAGCACTTTGGGAGGCCGAGACGGGCGGATCACGAGGTCAGGAGATCGAGACCATCCTGGCTAACACAATGAAACCCCGTCTCTACTAAAAAATACAAAAAACTAGCCGGGCGCGGTGGCGGGCGCCTGTAGTCCCAGCTAC	CTGTAATCCCAGCACTTTGGGAGGCCGAGACGGGCGGATCACGAGGTCAGGAGATCGAGACCATCCTGGCTAACACAATGAAACCCCGTCTCTACTAAAAAATACAAAAAACTAGCCGGGCGCGGTGGCGGGCGCCTGTAGTCCCAGCTACTCGGGAGGCTGAGGCAGGAGAATGGCGTGAACCCAGGAGGCGGAGCTTGCAGTGAGCTGAGATCCGGCCACTGCACTCCAGCCTGGGCGGCAGAGCGAGACTCCGTCTCAAAAAAAAAAAAAAAATAGTAGTTTATTTCCCTCCTTCTATAAATAGTGTAGGTTGTTAAGAGGAGTTTTATCTAGTGCTTAAGAGGATAGGCACTGGAGCTTTTTCTGGACCTAAAT
e4698ecf-9a77-4934-a784-32a466979f05	Chr1	118210766	118210782	ALU	Alu_YRb4	0	258	+	+	N	ATATATTCAACATTTGG	Hippocampus.Single.WGS.ON22212.Neuron-#19|41,Liver.Bulk.WGS.ON22212|9,Hippocampus.Single.RC-seq.ON22212.Neuron-#19|5,Hippocampus.Single.RC-seq.ON22212.Neuron-#37|1	Hippocampus.Single.WGS.ON22212.Neuron-#17|1,Hippocampus.Single.WGS.ON22212.Neuron-#19|47,Hippocampus.Single.WGS.ON22212.Neuron-#7|1,Liver.Bulk.WGS.ON22212|11,Hippocampus.Single.RC-seq.ON22212.Neuron-#19|11	TTGTAATTACTACATTTTGCCGTTTTCGGGACCCTGCACTCCCGCCTGGGCAACAGCGTTATAATACGTCTAAAAAAAAAAAAAAAAAAAAAAAAAAAAAAAAAATATATATATATATATATATTCAACATTTGGAAAATAGTAACCTGTGATAAATATTTGTTTGATGTATAAAGGCAATGGAGCTATTTAAAATTGTTTGGCACCCTGATATTGTCTATACTTTGGCATAGGTAAATGAGAGT	TTTTTTTTTTTTTTTTTTTTTTTTTTTTTGAGACGGAGTCTCACGCTGTTGCCCAGGCTGGAGTGCAGTGGCGCGATCTCGGCTCACTGCAAGCTCCGCCTCCTGGGTTCACGCCATTCTCCTGCCTCAGCCTCCTGAGTAGCTAGGACTACAGGCGCCCGCCACCGCGCCCGGCTAATTTTTTTTGTATTTTTAGTAGAGACGGGGTTTCACTGTGGTCTCGATCTCCTGACCTTGTGATCCGCCCGCCTCGGCCTCCCAAAGTGCTGGGATTACAGGCTTGAGCCACCGCGCCCGGCCCAAATGTTGAATATATTTAAACATTTTTCATTCATAATATCATCCCTCAACAAATGTTTCTGTAGTAGAGGAAAGTGACAAATTATCAAGTAGACATAA…	ATTTATCAAACGGTATTATGTCTACTTGATAATTTGTCACTTTCCTCTACTACAGAAACATTTGTTGAGGGATGATATTATGAATGAAAAATGTTTAAATATATTCAACATTTGGGCCGGGCGCGGTGGCTCAAGCCTGTAATCCCAGCACTTTGGGAGGCCGAGGCGGGCGGATCACAAGGTCAGGAGATCGAGACCACAGTGAAACCCCGTCTCTACTAAAAATACAAAAAAAATTAGCCGGGCGCGGTGGCGGGCGCCTGTAGTCCTAGCTACTTGGGCA	ATTTATCAAACGGTATTATGTCTACTTGATAATTTGTCACTTTCCTCTACTACAGAAACATTTGTTGAGGGATGATATTATGAATGAAAAATGTTTAAATATATTCAACATTTGGGCCGGGCGCGGTGGCTCAAGCCTGTAATCCCAGCACTTTGGGAGGCCGAGGCGGGCGGATCACAAGGTCAGGAGATCGAGACCACAGTGAAACCCCGTCTCTACTAAAAATACAAAAAAAATTAGCCGGGCGCGGTGGCGGGCGCCTGTAGTCCTAGCTACTTGGGCA
34a8f6fe-9850-4046-84f0-675639fe2b8e	Chr1	118357528	118357524	ALU	Alu_YRb4	0	258	-	-	N	AATTT	Hippocampus.Single.WGS.ON22212.Neuron-#10|12,Hippocampus.Single.WGS.ON22212.Neuron-#17|4,Hippocampus.Single.WGS.ON22212.Neuron-#19|16,Hippocampus.Single.WGS.ON22212.Neuron-#21|2,Liver.Bulk.WGS.ON22212|22,Hippocampus.Single.RC-seq.ON22212.Neuron-#10|1,Hippocampus.Single.RC-seq.ON22212.Neuron-#17|2,Hippocampus.Single.RC-seq.ON22212.Neuron-#19|7,Hippocampus.Single.RC-seq.ON22212.Neuron-#7|3	Hippocampus.Single.WGS.ON22212.Neuron-#10|3,Hippocampus.Single.WGS.ON22212.Neuron-#19|18,Liver.Bulk.WGS.ON22212|19,Hippocampus.Single.RC-seq.ON22212.Neuron-#17|1,Hippocampus.Single.RC-seq.ON22212.Neuron-#19|8,Hippocampus.Single.RC-seq.ON22212.Neuron-#7|1	TTTCATTGGAAAGATATCAACCCATTTCTCCAACATGTTTTAGGACAAGATGACTGCACAAGGAAAGCTGCATTTTCCAATATATTTTTATAGATAGATAGAGCTACGTGGCTAAGTTCCCAATGGGATGTTTGTGCAACTTCAATTTTTTTTTTTTTTTTTTTTTTTTTATACGAGAGAGTCTTGCTCTGTCACCCAGGCTGGGGTGGCCGTGGCGCAATATCGGCTCACTGCAAGCACCGCCACCCGGGTTCACGCCACTTTCT	AACTTCAATTTTTTTTTTTTTTTTTTTTTTGAGACGGAGTCTTGCTCTGTCACCCAGGCTGGAGTGCAGTGGCGCAATCTCGGCTCACTGCAAGCTCCGCCTCCCGGGTTCACGCCATTCTCCTGCCTCAGCCTCCTGAGTAGCTGGGACTACAGGCGCCCGCCACTGCGCCCGGCTAATTTTTTTTCTATTTTTAGTAGAGACGGGGTTTCACCATGGTCTCGATCTCCTGACCTTGTGATCCGCCCGCCTCGGCCTCCCAAAGTGCTGGGATTACAGGCGTGAGCCACCGCGCCCAGCCGCAACTTAATTTAATCTCATTTAAAAACTAAAATTTCTTCTCTTCACTTTCTATTTCTGTCTTCCTACTAGAAAGACAGAAGTGGAATAGCCAACATT…	AGAAATTTTAGTTTTTAAATGAGATTAAATTGAAGTTGCGGCCGGGCGCGGTGGCTCACGCCTGTAATCCCAGCACTTTGGGAGGCCGAGGCGGGCGGATCACAAGGTCAGGAGATCGAGACCATGGTGAAACCCCGTCTCTACTAAAAATAGAAAAAAAATTAGCCGGGCGCAGTGGCGGGCGCCTGTAGTCCCAGCTACTCAGGAGGCTGAGGCAGGAGAATGGCGTGAACCCGGGAGGCGGAGCTTGCAGTGAGCCGAGATTGCGCCACTGCACTCCAGCCTGGGTGACAGAGCAAGACTCCGTCTCAAAAAAAAAAAAAAAAAAAAAATTTAAGTTGCACAAAAACATCCCATTGGGAACTTAGCCACGTTAGAGTCTATCTATCTATAAAAATA…	AGAAATTTTAGTTTTTAAATGAGATTAAATTGAAGTTGCGGCCGGGCGCGGTGGCTCACGCCTGTAATCCCAGCACTTTGGGAGGCCGAGGCGGGCGGATCACAAGGTCAGGAGATCGAGACCATGGTGAAACCCCGTCTCTACTAAAAATAGAAAAAAAATTAGCCGGGCGCAGTGGCGGGCGCCTGTAGTCCCAGCTACTCAGGAGGCTGAGGCAGGAGAATGGCGTGAACCCGGGAGGCGGAGCTTGCAGTGAGCCGAGATTGCGCCACTGCACTCCAGCCTGGGTGACAGAGCAAGACTCCGTCTCAAAAAAAAAAAAAAAAAAAAAATTTAAGTTGCACAAAAACATCCCATTGGGAACTTAGCCACGTTAGAGTCTATCTATCTATAAAAATA…
475caf22-d622-4038-92ab-8ca17dce3bde	Chr1	118421282	118421294	ALU	Alu_YRc2	0	269	-	-	N	GGATATAATTTGT	Hippocampus.Single.WGS.ON22213.Neuron-#15|2,Hippocampus.Single.WGS.ON22213.Neuron-#69|1,Hippocampus.Single.WGS.ON22213.Neuron-#49|2,Liver.Bulk.WGS.ON22213|15	Hippocampus.Single.WGS.ON22213.Neuron-#69|2,Hippocampus.Single.WGS.ON22213.Neuron-#49|1,Liver.Bulk.WGS.ON22213|11	TTTAGTAGAGACGGGGTTTCACCATGTTAGCCAGGATGGTCTCGATCTCCTGACCTTGTGATCCGCCCGTCTCGGCCTCCCAAAGTGCTGGGATTACAGGCTTGAGCCACCGCGCCCGGCCGGATATAATTTGTTTAAAACAAAACTTTATTGCCTAATGATTCAATTAGTTTATTTTTGGAATCATTACATTTATTGATTCATTAAATATCCATGCGAAAAACATGTTTATATTGAACACTTAGAATGTGCCAGGCACTATATAGGGGTTGT	TTCAGATTTCTTTCTCAGTAGATGATTATCATAGACATTTTATTACAATGCAAAGAAAAGAAAAAGAAATGACTTATAGAAATAGAAGATACATAGTATTTTTCACCAAAACTCTCAAAATATACATTATAAGGATATAATTTGTGTTTTTTTTTTTTTTTTTTTACCAAGGACAGAA	CGCATGGATATTTAATGAATCAATAAATGAATGATTCCAAAAATAAACTAATTGAATCATTAGGCAATAAAGTTTTGTTTTAAACAAATTATATCCGGCCGGGCGCGGTGGCTCAAGCCTGTAATCCCAGCACTTTGGGAGGCCGAGACGGGCGGATCACAAGGTCAGGAGATCGAGACCATCCTGGCTAACATGGTGAAACCCCGTCTCTACTAAAAATACAAAAAAACTAGCCGGGCGAGGTGGCGGGCGCCTGTAGTCCCAGCTACTCGGGAGGCTGAGGCAGGAGAATGGCGTAAACCCAGGAGGAGGAGCTTGCAGTGAGCTGAGATCCGGCCACTGCACTCCAGCCTGGGCAACAGAGCGAGACTCCGTCTCAAAAAAAAAAAAAAAAAAAAA…	CGCATGGATATTTAATGAATCAATAAATGAATGATTCCAAAAATAAACTAATTGAATCATTAGGCAATAAAGTTTTGTTTTAAACAAATTATATCCGGCCGGGCGCGGTGGCTCAAGCCTGTAATCCCAGCACTTTGGGAGGCCGAGACGGGCGGATCACAAGGTCAGGAGATCGAGACCATCCTGGCTAACATGGTGAAACCCCGTCTCTACTAAAAATACAAAAAAACTAGCCGGGCGAGGTGGCGGGCGCCTGTAGTCCCAGCTACTCGGGAGGCTGAGGCAGGAGAATGGCGTAAACCCAGGAGGAGGAGCTTGCAGTGAGCTGAGATCCGGCCACTGCACTCCAGCCTGGGCAACAGAGCGAGACTCCGTCTCAAAAAAAAAAAAAAAAAAAAA…
c0082ba0-f1b3-40c4-a317-5a6dda9127e4	Chr1	119188031	119188043	ALU	Alu_YRa4	0	270	+	+	N	AAAAGGGAAGCAG	Hippocampus.Single.WGS.ON22213.Neuron-#14|3,Hippocampus.Single.WGS.ON22213.Neuron-#71|10,Liver.Bulk.WGS.ON22212|15,Liver.Bulk.WGS.ON22213|8,Hippocampus.Single.RC-seq.ON22213.Neuron-#71|3	Hippocampus.Single.WGS.ON22213.Neuron-#71|18,Liver.Bulk.WGS.ON22212|26,Liver.Bulk.WGS.ON22213|16,Hippocampus.Single.RC-seq.ON22213.Neuron-#71|3	TGTATATTGGGGGTAACCGGGTGGGGGTTGTTTTATTTTTTTTTTTTTTGGGCCACTCAAACCCTCCGGGGGGCAAACCGTTTCAACCCTTAAAAAAAAAAAAAAAAAAAAAAAAAAAAAAAAAAAAGGGAAGCAGATAAATTCAACCCCAGGATAGTACTGACTAGCTAGCTTTCCTGAAATTTAAGTTTGGGAGAAAAACTCTTCTTCTGTTCTTCTTAGGATTACAGAAACAGTTAAAAGAAAGAATCATTACTAGCAGTGGAAA	AAAATGAAATCTGAGTGTAAAATGAGCTCAAAAATGTCTGCCTCTCTGTAATAATTTATATAATAATCTAAAAAGAAGCGATCATATAAATGATATGATACCACTGCATAAAAGTTATTCTATAAGATATTTATAGTTTGCTCTATGAGATTAAAAAATGCATTCTTAATATATATTTCTTGTAATTATTAGAGAAGGTTTAAGTCTCAATGATTTGAATGGTAAAGAAAATATTACAATCACATATCATTAGTATCAACCACCTCAATATAAAAGGGAAGCAGGGCCGGGCGCGGTGGCTCAAGCCTGTAATCCCAGCACTTTGGGAGGCCGAGACGGGCGGATCACGAGGTCAGGAGATCGAGACCATCCTGGCTAACACGGTGAAACCCCGTCTCT…	TATATATTTCTTGTAATTATTAGAGAAGGTTTAAGTCTCAATGATTTGAATGGTAAAGAAAATATTACAATCACATATCATTAGTATCAACCACCTCAATATAAAAGGGAAGCAGGGCCGGGCGCGGTGGCTCAAGCCTGTAATCCCAGCACTTTTGGAGGCCGAGACGGGCGGATCACGAGGTCAGGAGATCGAGACCATCCTGGCTAACACGGTGAAACCCCGTCTCTACTAAAAAGTACAAAAAACTAGCCGGGCGAGGTGGCGGGCGCCTGTAGTCCCAGCTACTCAGGAGGCTGAGGCCGAGGAGAATGGCGGGAACCCGGGAGGCGGAGCTTGCAGTGAGCTGAGATCTGGCCACTGCACTCCAGCCTGGGCGACAGAGCGAGACTCCGTCTC…	TATATATTTCTTGTAATTATTAGAGAAGGTTTAAGTCTCAATGATTTGAATGGTAAAGAAAATATTACAATCACATATCATTAGTATCAACCACCTCAATATAAAAGGGAAGCAGGGCCGGGCGCGGTGGCTCAAGCCTGTAATCCCAGCACTTTTGGAGGCCGAGACGGGCGGATCACGAGGTCAGGAGATCGAGACCATCCTGGCTAACACGGTGAAACCCCGTCTCTACTAAAAAGTACAAAAAACTAGCCGGGCGAGGTGGCGGGCGCCTGTAGTCCCAGCTACTCAGGAGGCTGAGGCCGAGGAGAATGGCGGGAACCCGGGAGGCGGAGCTTGCAGTGAGCTGAGATCTGGCCACTGCACTCCAGCCTGGGCGACAGAGCGAGACTCCGTCTC…
a985503a-f27f-4ca7-bce3-a1e4747c21bd	Chr1	119270593	119270578	L1	L1_RS2	4024	6299	-	+	Y	AAAATTGGTATATCCT	Hippocampus.Single.WGS.ON22212.Neuron-#21|14,Hippocampus.Single.WGS.ON22212.Neuron-#7|1,Hippocampus.Single.WGS.ON22213.Neuron-#15|16,Hippocampus.Single.WGS.ON22213.Neuron-#25|23,Liver.Bulk.WGS.ON22212|8,Liver.Bulk.WGS.ON22213|7,Hippocampus.Single.RC-seq.ON22212.Neuron-#21|3,Hippocampus.Single.RC-seq.ON22213.Neuron-#15|5,Hippocampus.Single.RC-seq.ON22213.Neuron-#25|3	Hippocampus.Single.WGS.ON22212.Neuron-#7|1,Hippocampus.Single.WGS.ON22213.Neuron-#15|12,Liver.Bulk.WGS.ON22212|12,Liver.Bulk.WGS.ON22213|13,Hippocampus.Single.RC-seq.ON22212.Neuron-#7|1,Hippocampus.Single.RC-seq.ON22213.Neuron-#15|7	TTTTTTTTTTTTTTTTTTTTTTTTTTTAAATTTATTTATTATTATTATACTTTAAGTTGTAGGGTACATGTGCATAACGTGCAGGTTTGTTACATATGTATACTTGTGCCATGTTGCTGTGCTGCACCCATCAACTCGTCATTTACATCAGGTATAACTCCCAATGCAATCCCTCCCCCCTCCCCCCTCCCCATGATAGGCCCCGGTGTGTGATGTTCCCCTTCCTGAGTCCGAGTGATCTCATTGTTCAGTTCCCACCTATGAGTGAGAACATGCGGTGTTTGGTTTTCTGTTCTTGTGATAGTTTGCTAAGAATGATGGATTCCAGCTGCATCCAAGTCCCTACAAAGGACTCAAACTCATCCTTTTTTATGGCTGCATAGTATTCCATGGTGTATA…	CCAACAAAAAAAAAAAAAAAAAAAAAAAAAAAAAAAAAAAAAAAAAAAAAAAAAAAAAAAAAAAAAAAGCCTGCTGCCACAAAAAAAAAAAAAAAAAAAAAAAAAAAAAAAAAAAAAAAAATTGGTATATCCTCTTGCTGAATTGACCACTTTACTATTATACAGTAACATCATTTTTTCCTTTTTGTAGCCTTTGTCTTGGAGTCTAATTTATCTGATACAGATATAGTTACACCTATTGCACAT	ATCAACCCAAATGTCCATCAGTGACAGATTGGATTAAGAAAATGTGGCACATATACACCATGGAATACTATGCAGCCATAAAAAAGGATGAGTTTGAGTCCTTTGTAGGGACTTGGATGCAGCTGGAATCCATCATTCTTAGCAAACTATCACAAGAACAGAAAACCAAACACCGCATGTTCTCACTCATAGGTGGGACCTGAACAATGAGATCACTCGGACTCAGGAAGGGGAACATCACACACCGGGGCCTATCATGGGGAGGGGGGAGGGGGGAGGGATTGCATTGGGAGTTATACCTGATGTAAATGACGAGTTGATGGGTGCAGCACAGCAACATGGCACAAGTATACATATGTAACAAACCTGCACGTTATGCACATGTACCCTACAACTTAA…	ATATCATACTGAATGGGCAAAAACTGGAAAAATTCCCTTTGAAAACTGGCACAAGACAGGGATGCCCTCTCTCACCACTCCTATTCAACATAGTGTTGGAAGTTCTGGCTAGGGCAATCAGGCAAGAGAAAGAAATCAAGGGTATTCAGTTAGGAAAAGAAGAAGTCAAATTGTCCCTGTTTGCAGATGACATGATTGTATATTTAGAAAACCCCATTGTCTCAGCCCAAAATCTCCTTAAGCTGATAAGCAACTTCAGCAAAGTCTCAGGATACAAAATTAATGTGCAAAAATCACAAGCATTCTTATACACCAGTAACAGACAAACAGAGAGCCAAATCAGGAATGAACTTCCATTCACCGGGGCCTATCAGGGGGAGGGGGGGAGGGGGGAGGGAT…
451234a2-f72a-4477-8b43-81967bd4d0af	Chr1	119409658	119409644	ALU	Alu_YRb4	0	258	+	+	N	TAAATATAAATGGAA	Hippocampus.Single.WGS.ON22212.Neuron-#17|19,Liver.Bulk.WGS.ON22212|10,Hippocampus.Single.RC-seq.ON22212.Neuron-#17|6	Hippocampus.Single.WGS.ON22212.Neuron-#17|14,Liver.Bulk.WGS.ON22212|11,Hippocampus.Single.RC-seq.ON22212.Neuron-#17|3	TAAGCACCAAAAAAGGATATAAAGGAGAAAACTGACAAAAATGTTATAACATCCAGGAAGCAATGAACAAATTGGCAGTAGCAAATCATTCTCTATCTCTGATTACTTTAAATATAAATGGAAGCGGCCGGGCGCGGTGGCTCAAGCCTGTAATCCCAGCACTTTGGGAGGCCGAGACGGGCGGATCACGAGGTCAGGAGATCGAGACCATCCTGGCTAACACGGTGAAACCCCGTCTCTACTAAAAAATACAAAAAACTAGCCGGGCGCGGTGGCGGGCGCCTGTAGTCCCAACTACTTGGGAGGCTGAGGCAGGAGAATGGCATGAACCCGGGAGGCGGAGCTTGCAGTGAGCTGAGATCCGGCCACTGCACTCCAGCCTGGGCGGCAGAGCGAGAC…	GGCATGAACCCGGGAGGCGGAGCTTGCAGTGAGCTGAGATCCGGCCACTGCACTCCAGCCTGGGCGGCAGAGCGAGACTCCGTCTCAAAAAAAATAAATAAATAAATAAATAAAAAATAAATAAATATAAATGGAATAAACTCCTTGCTATGATCTAAATGTTTGTTATTTCCCCAAAATTTATATGTTGAAACGAAATAATCATTGCAATTGTAATTGGGGGTAGGGCCTTTGAGAGGTCATTAGATAATTAGGGACGAGCTCT	AAAGGATATAAAGGAGAAAACTGACAAAAATGTTATAACATCCAGGAAGCAATGAACAAATTGGCAGTAGCAAATCATTCTCTATCTCTGATTACTTTAAATATAAATGGAAGCGGCCGGGCGCGGTGGCTCAAGCCTGTAATCCCAGCACTTTGGGAGGCCGAGACGGGCGGATCACGAAAGGTCAGGAGATCGAGACCATCCTGGCTAACACGGTGAAACCCCGTCTCTACTAAAAAATACAAAAAACTAGCCGGGCGCGGTGGCGGGCGCCTGTAGTCCCAACTACTTGGGAGGCTGAGGCAGGAGAATGGCATGAACCCGGGAGGCGGAGCTTGCAGTGAGCTGAGATCCGGCCACTGCACTCCAGCCTGGGCGGCAGAGCGAGACTCCGTCTCA…	AAAGGATATAAAGGAGAAAACTGACAAAAATGTTATAACATCCAGGAAGCAATGAACAAATTGGCAGTAGCAAATCATTCTCTATCTCTGATTACTTTAAATATAAATGGAAGCGGCCGGGCGCGGTGGCTCAAGCCTGTAATCCCAGCACTTTGGGAGGCCGAGACGGGCGGATCACGAAAGGTCAGGAGATCGAGACCATCCTGGCTAACACGGTGAAACCCCGTCTCTACTAAAAAATACAAAAAACTAGCCGGGCGCGGTGGCGGGCGCCTGTAGTCCCAACTACTTGGGAGGCTGAGGCAGGAGAATGGCATGAACCCGGGAGGCGGAGCTTGCAGTGAGCTGAGATCCGGCCACTGCACTCCAGCCTGGGCGGCAGAGCGAGACTCCGTCTCA…
414645a6-83d5-45cd-b281-a4df6f17466c	Chr1	119650065	119650081	ALU	Alu_YRb4	0	258	+	+	N	TAAAAATATGACTATTA	Hippocampus.Single.WGS.ON22212.Neuron-#16|1,Hippocampus.Single.WGS.ON22212.Neuron-#19|2,Hippocampus.Single.WGS.ON22212.Neuron-#7|3,Hippocampus.Single.WGS.ON22213.Neuron-#69|25,Hippocampus.Single.WGS.ON22213.Neuron-#25|2,Hippocampus.Single.WGS.ON22213.Neuron-#49|2,Liver.Bulk.WGS.ON22212|15,Liver.Bulk.WGS.ON22213|35,Hippocampus.Single.RC-seq.ON22213.Neuron-#69|5	Hippocampus.Single.WGS.ON22212.Neuron-#10|5,Hippocampus.Single.WGS.ON22212.Neuron-#16|1,Hippocampus.Single.WGS.ON22212.Neuron-#19|7,Hippocampus.Single.WGS.ON22212.Neuron-#7|3,Liver.Bulk.WGS.ON22212|18,Liver.Bulk.WGS.ON22213|5,Hippocampus.Single.RC-seq.ON22212.Neuron-#16|2,Hippocampus.Single.RC-seq.ON22212.Neuron-#19|1	AAGTAATTATGGTGAATTTTGTGTATTTGTATGTGTAAAGACACCTATTTCTTATAGACTGCTAAGTTTGATTGATTATTATACATGGAAGTTCATCAGAAATTACTTAAAAATTCCTAAAGTTAGGAGAAAGATCATTGCCCATTATTCTTTAATATATTTTTGAACCTAATTACAATAAAAATAAATGATTTGATCTATAATTAAATAAGTAATTATAATAGTCATATTTTTATTTTTTTTTTATTTTTTTATTTTTATTTTTTTTGAGACGGAGTCTCGATCTGTCGCCCAGGCTGGAGTGCAGTGGCGCGATCTCGGCTCACTGCAAGCTCCGCCTCCCGGGCCGACGCCATTCTCCTGCCTCAGCCTCCCGAGTAGCTGGGACTACAGGCGCCC…	AAGTAATTATGGTGAATTTTGTGTATTTGTATGTGTAAAGACACCTATTTCTTATAGACTGCTAAGTTTGATTGATTATTATACATGGAAGTTCATCAGAAATTACTTAAAAATTCCTAAAGTTAGGAGAAAGATCATTGCCCATTATTCTTTAATATATTTTTGAACCTAATTACAATAAAAATAAATGATTTGATCTATAATTAAATAAGTAATTATAATAGTCATATTTTTATTTTTTTTTTATTTTTTTATTTTTATTTTTTTTGAGACGGAGTCTCGATCTGTCGCCCAGGCTGGAGTGCAGTGGCGCGATCTCGGCTCACTGCAAGCTCCGCCTCCCGGGCCGACGCCATTCTCCTGCCTCAGCCTCCCGAGTAGCTGGGACTACAGGCGCCC…	AGCCGGGCGCAGTGGCTCACGTCTGTAATCCCAGCACTTTGGGAGGCTGAGGCGGGTGGATCACAAGGTCAGGAGATCGAGACCATCCTGGCTAAAACGGTGAAACCCCGTCTCTACTAAAAATACAAAAAATTAGCCGGGCGCGGAGGCGGGCGCCTGTAGGTCCCAGCTACTCGGGAGGCTGAGGCAGGAGAATGGCGTCGGCCCGGGAGGCGGAGCTTGCAGTGAGCCGAGATCGCGCCACTGCACTCCAGCCTGGGCGACAGATCGAGACTCCGTCTCAAAAAAAATAAAAATAAAAAAATGATAA	AGCCGGGCGCAGTGGCTCACGTCTGTAATCCCAGCACTTTGGGAGGCTGAGGCGGGTGGATCACAAGGTCAGGAGATCGAGACCATCCTGGCTAAAACGGTGAAACCCCGTCTCTACTAAAAATACAAAAAATTAGCCGGGCGCGGAGGCGGGCGCCTGTAGGTCCCAGCTACTCGGGAGGCTGAGGCAGGAGAATGGCGTCGGCCCGGGAGGCGGAGCTTGCAGTGAGCCGAGATCGCGCCACTGCACTCCAGCCTGGGCGACAGATCGAGACTCCGTCTCAAAAAAAATAAAAATAAAAAAATGATAA
65db7d25-8f5a-42ad-9558-f5153471e95f	Chr1	119944180	119944196	ALU	Alu_YRa4	0	270	+	+	N	AAAAAAAACTTGCTCTA	Hippocampus.Single.WGS.ON22213.Neuron-#14|1,Hippocampus.Single.WGS.ON22213.Neuron-#49|1,Liver.Bulk.WGS.ON22213|18,Hippocampus.Single.RC-seq.ON22213.Neuron-#38|3	Hippocampus.Single.WGS.ON22213.Neuron-#38|2,Liver.Bulk.WGS.ON22213|10,Hippocampus.Single.RC-seq.ON22213.Neuron-#38|2	GGGGGGAGGAGGGAAAAGGGGGGAACCCGGGGGGGGGGGCTTGGCATGAGGGGAAAACCCGGCCACACCACCCAAGCTGGGAGGCAAAGGGAAGCCCCCTTCAAAAAAAAAAAAAAAAAAAAAAAAAACTTGCTCTAAAAATATTTAAAATACAACACTATGAAAATTTATTATGGCATTTCTAGCATTTAGTTTTATTCAGTTAAAGATATCTGTTTATGTTACTCTGAAAACTTGTGGTTTTAATACACTTAATGAGCAATTTT	TTTTTTTTTTTTTTTTTTTTTTTTTTTTGAGACGGAGTCTCGCTCTGCCGTCCAGGCTGGAGTGCAGTGGCCGGATCTCAGCTCACTGCAAGCTCCACCTCCCGGGTTCACGCCATTCTCCTGCCTCAGCCTCCCGAGTAGCTGGGATTACAGGCGCCCGCCACCTCGCCCGGCTAGCTTTTTGTATTTTTTAGTAGAGACGGGGTTTCACCGTGTCAGCCAGGATGGTCTCGATCTCCTGACCTTGTGATCCGCCCGTCTCGGCCTCCCAAAGTGCTGGGATTACAGGCTTGAGCCACCGCGCCCGGCCTAGAGCAAGTTTTTTTTATTGCTAATAACTTTAAAATTATTAAAAACAGAATGATAGCATTTCCCAGTTTTAAACAAATTATATAAATA…	TTCGGTAAGCTCCTTAATACTATTTATATAATTTGTTTAAAACTGGGAAATGCTATCATTCTGTTTTTAATAATTTTAAAGTTATTAGCAATAAAAAAAACTTGCTCTAGGCCGGGCGCGGTGGCTCAAGCCTGTAATCCCAGCACTTTGGGAGGCCGAGACGGGCGGATCACAAGGTCAGGAGATCGAGACCATCCTGGCTGACACGGTGAAACCCCGTCTCTACTAAAAAATACAAAAAGCTAGCCGGGCGAGGTGGCGGGCGCCTGTAATCCCAGCTACTCGGGAGGCTGAGGCAGGAGAATGGCGTGAACCCGGGAGGTGGAGCTTGCAGTGAGCTGAGATCCGGCCACTGCACTCCAGCCTGGACGGCAGAGCGAGACTCCGTCTCAAAAAAAA…	TTCGGTAAGCTCCTTAATACTATTTATATAATTTGTTTAAAACTGGGAAATGCTATCATTCTGTTTTTAATAATTTTAAAGTTATTAGCAATAAAAAAAACTTGCTCTAGGCCGGGCGCGGTGGCTCAAGCCTGTAATCCCAGCACTTTGGGAGGCCGAGACGGGCGGATCACAAGGTCAGGAGATCGAGACCATCCTGGCTGACACGGTGAAACCCCGTCTCTACTAAAAAATACAAAAAGCTAGCCGGGCGAGGTGGCGGGCGCCTGTAATCCCAGCTACTCGGGAGGCTGAGGCAGGAGAATGGCGTGAACCCGGGAGGTGGAGCTTGCAGTGAGCTGAGATCCGGCCACTGCACTCCAGCCTGGACGGCAGAGCGAGACTCCGTCTCAAAAAAAA…
e52e3507-5c09-47ea-8406-bea8cca49bdc	Chr1	120723298	120723313	ALU	Alu_YRb4	0	258	+	+	N	AATATGGTGCTGATTG	Hippocampus.Single.WGS.ON22212.Neuron-#16|17,Hippocampus.Single.WGS.ON22212.Neuron-#19|24,Hippocampus.Single.WGS.ON22212.Neuron-#21|2,Liver.Bulk.WGS.ON22212|24,Hippocampus.Single.RC-seq.ON22212.Neuron-#16|16,Hippocampus.Single.RC-seq.ON22212.Neuron-#19|3,Hippocampus.Single.RC-seq.ON22212.Neuron-#21|1	Hippocampus.Single.WGS.ON22212.Neuron-#16|19,Hippocampus.Single.WGS.ON22212.Neuron-#19|19,Hippocampus.Single.WGS.ON22212.Neuron-#21|3,Liver.Bulk.WGS.ON22212|11,Hippocampus.Single.RC-seq.ON22212.Neuron-#16|10,Hippocampus.Single.RC-seq.ON22212.Neuron-#19|3,Hippocampus.Single.RC-seq.ON22212.Neuron-#21|4	AACTGTTTGGCTCAATGCTATTGTACCTGTCCAGCTTCACCTTTATTTAGCAAAATTATCAAAAGGCTCCTGGTATAAAGGAACAAAAAAGAGTGTTAAGTAACCTATAAATTAGATAATCAATCTTTAAATGATCATCTTATTGAATTATTACAATTATCTTTATAAATATAAATTTCTTAGAATTGGTTAAATGTACATATATGCTTTGGCAAGTTAAATTTACCAAAATACATTAAAATTGTGGGCATGTAAACAAACATAAATAATAGTACCTTTAATATGGTGCTGATTGGGGCCGGGCGCGGTGGCTCAAGCCTGTAATCCCAGCACTTTGGGAGGCCGAGGCGGGCGGATCACAAGGTCAGGAGATCGAGACCACAGTGAAACCCCGTCTCT…	AACTGTTTGGCTCAATGCTATTGTACCTGTCCAGCTTCACCTTTATTTAGCAAAATTATCAAAAGGCTCCTGGTATAAAGGAACAAAAAAGAGTGTTAAGTAACCTATAAATTAGATAATCAATCTTTAAATGATCATCTTATTGAATTATTACAATTATCTTTATAAATATAAATTTCTTAGAATTGGTTAAATGTACATATATGCTTTGGCAAGTTAAATTTACCAAAATACATTAAAATTGTGGGCATGTAAACAAACATAAATAATAGTACCTTTAATATGGTGCTGATTGGGGCCGGGCGCGGTGGCTCAAGCCTGTAATCCCAGCACTTTGGGAGGCCGAGGCGGGCGGATCACAAGGTCAGGAGATCGAGACCACAGTGAAACCCCGTCTCT…	TGTACATATATGCTTTGGCAAGTTAAATTTACCAAAATACATTAAAATTGTGGGCATGTAAACAAACATAAATAATAGTACCTTTAATATGGTGCTGATTGGGGCCGGGCGCGGTGGCTCAAGCCTGTAATCCCAGCACTTTGGTAGGCCGAGGCGGGCGGATCACAAGGTCAGGAGATCGAGACCACAGTGAAACCCCGTCTCTACTAAAAATACAAAAAATTAGCCGGGCGCGGTGGCGGGCGCCTGTAGTCCTAGCTACTCAGGAGGCTGAGGCAGGAGAATGGCGTGAACCCAGGAGGCGGAGCTTGCAGTGAGCCGAGATCGCGCCACTGCACTCCAGCCTGGGCAACAGCGTGAGCCTCCGTCTCAAAAACAAACCCACAAAAACAAAAAAAA…	TGTACATATATGCTTTGGCAAGTTAAATTTACCAAAATACATTAAAATTGTGGGCATGTAAACAAACATAAATAATAGTACCTTTAATATGGTGCTGATTGGGGCCGGGCGCGGTGGCTCAAGCCTGTAATCCCAGCACTTTGGTAGGCCGAGGCGGGCGGATCACAAGGTCAGGAGATCGAGACCACAGTGAAACCCCGTCTCTACTAAAAATACAAAAAATTAGCCGGGCGCGGTGGCGGGCGCCTGTAGTCCTAGCTACTCAGGAGGCTGAGGCAGGAGAATGGCGTGAACCCAGGAGGCGGAGCTTGCAGTGAGCCGAGATCGCGCCACTGCACTCCAGCCTGGGCAACAGCGTGAGCCTCCGTCTCAAAAACAAACCCACAAAAACAAAAAAAA…
4fd84e2c-618a-4434-91b8-7e0bf1b26818	Chr1	120746141	120746153	ALU	Alu_YRa4	0	270	-	-	N	GGCTACCCAATTT	Hippocampus.Single.WGS.ON22212.Neuron-#21|12,Liver.Bulk.WGS.ON22212|11	Hippocampus.Single.WGS.ON22212.Neuron-#21|2,Liver.Bulk.WGS.ON22212|17,Hippocampus.Single.RC-seq.ON22212.Neuron-#21|1	TCTCTAAGATCACACAATGTTTAATGGCAGAATAGAATTTTAATCCAGCCAATCAGGCTTTAGAGTTTATCCTTTAATCACTACCTAATATAGCCTCTCTGTACAGTACAGTGGTGATGAGCACAGATTCTGGAGCCAGATATCCTGAATTCAAAATCCAGCTTCACTACATACTAAGTATGTGACTTGGAGCATAATTTCTCTCAGCCTCAGTTTCCTAATTTGCATACTGGAATGATATATTATACAGATCCTTACCAGGATTAAATTGGGTAGCCTGGCCGGGCGCGGTGGCTCAAGCCTGTAATCCCAGCACTTTGGGAGGCCGAGACGGGCGGATCACGAGGTCAGGAGATCGAGACCATCCTGGCTAACACGGTGAAACCCCGTCTCTACTAA…	AATGGCAGAATAGAATTTTAATCCAGCCAATCAGGCTTTAGAGTTTATCCTTTAATCACTACCTAATATAGCCTCTCTGTACAGTACAGTGGTGATGAGCACAGATTCTGGAGCCAGATATCCTGAATTCAAAATCCAGCTTCACTACATACTAAGTATGTGACTTGGAGCATAATTTCTCTCAGCCTCAGTTTCCTAATTTGCATACTGGAATGATATATTATACAGATCCTTACCAGGATTAAATTGGGTAGCCTGGCCGGGCGCGGTGGCTCAAGCCTGTAATCCCAGCACTTTGGGAGGCCGAGACGGGCGGATCACGAGGTCAGGAGATCGAGACCATCCTGGCTAACACGGTGAAACCCCGTCTCTACTAAAAAATACAAAAAACTAGCCGGG…	TCCTTACCAGGATTAAATTGGGTAGCCTGGCCGGGCGCGGTGGCTCAAGCCTGTAATCCCAGCACTTTGGGAGGCCGAGACGGGCGGATCACGAGGTCAGGAGATCGAGACCATCCTGGCTAACACGGTGAAACCCCGTCTCTACTAAAAAATACAAAAAACTAGCCGGGCGAGGTGGCGGGCGCCTGTAGTCCCAGCTACTTGGGAGGCTGAGGCAGGAGAATGGCGTAAACCCGGGAGGCGGAGCTTGCAGTGAGCTGAGATCCGGCCACTGCACTCCAGCCCGGGCGATAGAGTGAGACTCCGTCTCAAAAAAAAAAAAAAAAAAAAAAATTGGGAAGCCCATGAAGACAAACTAGCACCGTG	TCCTTACCAGGATTAAATTGGGTAGCCTGGCCGGGCGCGGTGGCTCAAGCCTGTAATCCCAGCACTTTGGGAGGCCGAGACGGGCGGATCACGAGGTCAGGAGATCGAGACCATCCTGGCTAACACGGTGAAACCCCGTCTCTACTAAAAAATACAAAAAACTAGCCGGGCGAGGTGGCGGGCGCCTGTAGTCCCAGCTACTTGGGAGGCTGAGGCAGGAGAATGGCGTAAACCCGGGAGGCGGAGCTTGCAGTGAGCTGAGATCCGGCCACTGCACTCCAGCCCGGGCGATAGAGTGAGACTCCGTCTCAAAAAAAAAAAAAAAAAAAAAAATTGGGAAGCCCATGAAGACAAACTAGCACCGTG
f6c68a29-10d4-420f-b5b4-cca886627884	Chr1	120922224	120922232	ALU	Alu_YRa4	0	270	+	+	N	AAAGAAAGT	Hippocampus.Single.WGS.ON22213.Neuron-#14|14,Hippocampus.Single.WGS.ON22213.Neuron-#23|3,Hippocampus.Single.WGS.ON22213.Neuron-#31|4,Hippocampus.Single.WGS.ON22213.Neuron-#38|5,Hippocampus.Single.WGS.ON22213.Neuron-#39|5,Hippocampus.Single.WGS.ON22213.Neuron-#47|1,Liver.Bulk.WGS.ON22213|12,Hippocampus.Single.RC-seq.ON22213.Neuron-#14|5,Hippocampus.Single.RC-seq.ON22213.Neuron-#31|4,Hippocampus.Si…	Hippocampus.Single.WGS.ON22213.Neuron-#14|13,Hippocampus.Single.WGS.ON22213.Neuron-#23|1,Hippocampus.Single.WGS.ON22213.Neuron-#31|7,Hippocampus.Single.WGS.ON22213.Neuron-#38|7,Hippocampus.Single.WGS.ON22213.Neuron-#39|5,Hippocampus.Single.WGS.ON22213.Neuron-#52|1,Hippocampus.Single.WGS.ON22213.Neuron-#47|2,Liver.Bulk.WGS.ON22213|10,Hippocampus.Single.RC-seq.ON22213.Neuron-#14|10,Hippocampus.Sing…	GAGGACGGTGACTCTGGACGGCCGCCCCCCCCTCTGTCGAATCGAAGGCCTAACACACACAAGCCAATTGCAAATAAAAAAAAAAACAAAAAAACAAAAAAAAAAAAAAAAAAAAAAAAGAAAGTGACAAGTGCTATGGAAAAATAGAATGTACAGCAAAGATTGATTGAAAACATCTGAGGGCGCAATTGTAAATGGATCAGCAGAGCATGGTTTATTTTTAAAAAACTATAAAATTTTA	TTTTTTTTTTTTTTTTTTTTTTTTTTTGAGACGGAGTCTCGCTGTGTCGCCCAGGCTGGAGTGCAGTGGCGCGATCTCGGCTCACTGCAAACTCCGCCTCCCGGGTTCACGCCATTCTCCCGCCTCAGCCTCCCAAGTAGCTGAGACTACAGGCGCCCGCCACCACGCCCGGCTAGTTTTTTGTATTTTTAGTAGAGACGGGGTTTCACCATGTTAGCCAGGATAGTCTCGATCTCCTGACCTCGTGATCCACCCGCCTCGGCCTCCCAAAGTGCTGGGATTACAGGCTTGAGCCACCGCGCCCGGCCTATCACTTTCTTTATCTAATGCATTTAGCATTTAGCAATGCTAAATGATCCATTTGTTTATTCTATTTATTGACTGTCTCTGCCTGATCTA…	CTTTCTGCCTGTATGGAGCTGATATTTTAGATCAGGCAGAGACAGTCAATAAATAGAATAAACAAATGGATCATTTAGCATTGCTAAATGCTAAATGCATTAGATAAAGAAAGTGATAGGCCGGGCGCGGTGGCTCAAGCCTGTAATCCCAGCACTTTGGGAGGCCGAGGCGGGTGGATCACGAGGTCAGGAGATCGAGACTATCCTGGCTAACATGGTGAAACCCCGTCTCTACTAAAAATACAAAAAACTAGCCGGGCGTGGTGGCGGGCGCCTGTAGTCTCAGCTACTTGGGAGGCTGAGGCGGGAGAATGGCGTGAACCCGGGAGGCGGAGTTTGCAGTGAGCCGAGATCGCGCCACTGCACTCCAGCCTGGGCGACACAGCGAGACTCCGTCTC…	CTTTCTGCCTGTATGGAGCTGATATTTTAGATCAGGCAGAGACAGTCAATAAATAGAATAAACAAATGGATCATTTAGCATTGCTAAATGCTAAATGCATTAGATAAAGAAAGTGATAGGCCGGGCGCGGTGGCTCAAGCCTGTAATCCCAGCACTTTGGGAGGCCGAGGCGGGTGGATCACGAGGTCAGGAGATCGAGACTATCCTGGCTAACATGGTGAAACCCCGTCTCTACTAAAAATACAAAAAACTAGCCGGGCGTGGTGGCGGGCGCCTGTAGTCTCAGCTACTTGGGAGGCTGAGGCGGGAGAATGGCGTGAACCCGGGAGGCGGAGTTTGCAGTGAGCCGAGATCGCGCCACTGCACTCCAGCCTGGGCGACACAGCGAGACTCCGTCTC…
e52d7626-a410-4349-8048-626a23f9f42c	Chr1	121017527	121017538	ALU	Alu_YRc2	0	269	-	-	N	ACTGTGACTCTT	Hippocampus.Single.WGS.ON22212.Neuron-#16|10,Hippocampus.Single.WGS.ON22212.Neuron-#17|6,Hippocampus.Single.WGS.ON22212.Neuron-#19|1,Hippocampus.Single.WGS.ON22213.Neuron-#15|4,Hippocampus.Single.WGS.ON22213.Neuron-#69|3,Hippocampus.Single.WGS.ON22213.Neuron-#38|1,Liver.Bulk.WGS.ON22212|33,Liver.Bulk.WGS.ON22213|10,Hippocampus.Single.RC-seq.ON22212.Neuron-#16|2,Hippocampus.Single.RC-seq.ON22212.N…	Hippocampus.Single.WGS.ON22212.Neuron-#16|2,Hippocampus.Single.WGS.ON22212.Neuron-#17|2,Hippocampus.Single.WGS.ON22212.Neuron-#19|2,Hippocampus.Single.WGS.ON22212.Neuron-#7|1,Hippocampus.Single.WGS.ON22213.Neuron-#10|1,Hippocampus.Single.WGS.ON22213.Neuron-#38|2,Hippocampus.Single.WGS.ON22213.Neuron-#47|6,Liver.Bulk.WGS.ON22212|11,Liver.Bulk.WGS.ON22213|14,Hippocampus.Single.RC-seq.ON22212.Neuron…	TTTAGTAGAGACGGGGTTTCACCGTGTTAGCCAGGATGGTCTCGATCTCCTGACCTTGTGATCCGCCCGTCTCGGCCTCCCAAAGTGCTGGGATTACAGGCTTGAGCCACCGCGCCCGGCTGAACTGTGACTCTTAAGTACATACACAAGAGAATTAAAAACACAAGTCCAAACAAAAATTTGTATGTAAATATTTACAAAAACAGAAACAACCCAAATATTTATCAATGAATGAATGGATTAACAAAAATGTGATGTATCCATACAAGA	AATAAAGAGTGCTGGCAAAGAGCTGAAGAAACTGAAACATTGATGCTGGTGGTAATATAACATGTACAGCCACTTTAGAAAAGAGATTGGCAGTTCTTTGAAAATTTAAAACGTGGAGTTTCCATATGACCCAGAACTGTGACTCTTTTTTTTTTTTTTTTTTTTTTTTTTTAAGTTTTGAACGGGGGTTGAGGTGTGTAAACCAGGCT	TTGTGTATGTACTTAAGAGTCACAGTTCGGCCGGGCGCGGTGGCTCAAGCCTGTAATCCCAGCACTTTGGGAGGCCGAGACGGGCGGATCACAAGGTCAGGAGATCGAGACCATCCTGGCTAACACGGTGAAACCCCGTCTCTACTAAAAATACAAAAAACTAGCAGGGCGAGGTGGCGGGCGCCTGTAGTCCCAGCTACTCGGGAGGCTGAGGCCGGAGAATGGCGTAAACCCGGGAGGCGGAGCTTGCAGTGAGCTGAGATCCGGCCACTGTACTCCAGCCTGGGGTGACAGAGCGAGACTCCGTCTCAAAAAAAAAAAAAAAAAAAAAAAAAAAAAGTCAAGGAATAGTG	TTGTGTATGTACTTAAGAGTCACAGTTCGGCCGGGCGCGGTGGCTCAAGCCTGTAATCCCAGCACTTTGGGAGGCCGAGACGGGCGGATCACAAGGTCAGGAGATCGAGACCATCCTGGCTAACACGGTGAAACCCCGTCTCTACTAAAAATACAAAAAACTAGCAGGGCGAGGTGGCGGGCGCCTGTAGTCCCAGCTACTCGGGAGGCTGAGGCCGGAGAATGGCGTAAACCCGGGAGGCGGAGCTTGCAGTGAGCTGAGATCCGGCCACTGTACTCCAGCCTGGGGTGACAGAGCGAGACTCCGTCTCAAAAAAAAAAAAAAAAAAAAAAAAAAAAAGTCAAGGAATAGTG
0ee86ba5-e7e4-4697-9b6d-8da52a6599d6	Chr1	121063138	121063150	L1	L1_RS2	4061	6299	+	-	Y	AAAAGAAACTATC	Hippocampus.Single.WGS.ON22212.Neuron-#16|1,Hippocampus.Single.WGS.ON22212.Neuron-#21|3,Hippocampus.Single.WGS.ON22212.Neuron-#37|1,Hippocampus.Single.WGS.ON22212.Neuron-#7|3,Liver.Bulk.WGS.ON22212|34,Hippocampus.Single.RC-seq.ON22212.Neuron-#16|1,Hippocampus.Single.RC-seq.ON22212.Neuron-#21|1,Hippocampus.Single.RC-seq.ON22212.Neuron-#7|2	Hippocampus.Single.WGS.ON22212.Neuron-#19|5,Hippocampus.Single.WGS.ON22212.Neuron-#37|2,Hippocampus.Single.WGS.ON22212.Neuron-#7|7,Hippocampus.Single.WGS.ON22213.Neuron-#52|1,Liver.Bulk.WGS.ON22212|20,Hippocampus.Single.RC-seq.ON22212.Neuron-#19|1,Hippocampus.Single.RC-seq.ON22212.Neuron-#7|2	AAAAAAAAAAAAATCACATGCTTTAAATAATTCCTTTTTGTCCGTTTCAGGTTGCCAAAAAAAAAAAAAAAAAAAAAAAAAAAAAAGAAACTATCATCAGAGTAAACAGGCAACCTACAGAATAGGAGAAAATTTTTGCAATCTATCCAACTCTGACAAAGGGCTAATATCCAGAATCTACAAGGAACTTAAAAAAATTCAGAAGAAAAAACAACCCCATCAAAATGTGG	GGAAGAAAACCTAGGCAACATCATTTGGGACATAGGCATGGGTAAAGACTTCATGACTAAAACACTAAAAGCAATTGCAACAAAACTCAAAATTGAAAAATGGGATCTAATTAAACTAAAAAGCTTCTGCACAACAAAAGAAACTATCTCTGATGGCCAGTGATGATGAGCATTTTTTCATGTGTCTGTTGGCTGTATGAATGTCTTCTTTTGAGAAATGTCTGTTCATGTCCTTTGCCCACTTTTTGATGGGGTTGTTTGTTTT	AAGAAAACCTAGGCAACATCATTTGGGACATAGGCATGGGTAAAGACTTCATGACTAAAACACTAAAAGCAATTGCAACAAAACTCAAAATTGAAAAATGGGATCTAATTAAACTAAAAAGCTTCTGCACAACAAAAGAAACTATCTCTGATGGCCAGTGATGATGAGCATTTTTTCATGTGTCTGTTGGCTTGGGATTGTAAACTAGTTCAACCATTATGGAAAACAGTATGGCGATTCCTCAAGGATCTAGAACTAGAAGTACCATATGACCCAGCCATTCCATTACTGGGTATATACCCAAAGGATTATAAATTATGCTGCTATAAAGACACATGCACACGTATGTTTATTGCAGCACTATTCACAATAGCAAAGACTTGGAATCAACCCAAATGT…	AAGAAAACCTAGGCAACATCATTTGGGACATAGGCATGGGTAAAGACTTCATGACTAAAACACTAAAAGCAATTGCAACAAAACTCAAAATTGAAAAATGGGATCTAATTAAACTAAAAAGCTTCTGCACAACAAAAGAAACTATCTCTGATGGCCAGTGATGATGAGCATTTTTTCATGTGTCTGTTGGCTTGGGATTGTAAACTAGTTCAACCATTATGGAAAACAGTATGGCGATTCCTCAAGGATCTAGAACTAGAAGTACCATATGACCCAGCCATTCCATTACTGGGTATATACCCAAAGGATTATAAATTATGCTGCTATAAAGACACATGCACACGTATGTTTATTGCAGCACTATTCACAATAGCAAAGACTTGGAATCAACCCAAATGT…
01321c75-3ca9-4483-8d73-a75aaab05323	Chr1	121246373	121246388	ALU	Alu_YRa4	0	270	+	+	N	AGAAAAATATCTTCCT	Hippocampus.Single.WGS.ON22212.Neuron-#10|6,Hippocampus.Single.WGS.ON22213.Neuron-#10|1,Hippocampus.Single.WGS.ON22213.Neuron-#39|2,Hippocampus.Single.WGS.ON22213.Neuron-#52|2,Liver.Bulk.WGS.ON22212|3,Liver.Bulk.WGS.ON22213|8,Hippocampus.Single.RC-seq.ON22213.Neuron-#15|1	Hippocampus.Single.WGS.ON22212.Neuron-#19|2,Hippocampus.Single.WGS.ON22213.Neuron-#15|1,Hippocampus.Single.WGS.ON22213.Neuron-#23|2,Hippocampus.Single.WGS.ON22213.Neuron-#39|4,Liver.Bulk.WGS.ON22212|22,Liver.Bulk.WGS.ON22213|16	AATTTAAAGTTTTAAACTATTTTGCCATGAATGTGTTATCAATTTCAGCAAATAAGAGCAATTTTATCTTGTATTTACAGCACTTTTAAAAAAAAAAAAAAAAAAAAAAAGAAAAAGAAAAATATCTTCCTGTAAATTAATTGGTTCATCTCCTTCATCATATCAGGAAAAAATCATATATATATGATGTATATTCACAAAGACATATATACACATGGATCTAAATATTCCCTTCAGATTCTGTTAGTCTCATACTC	TAAGAGGTATCAGAAGCATAATAAATGCCTACACTTGAGAAGCATGCATTCTAGTAGGAGAGACAAGACAGGAGCATTGCTTTCACTAATAAACAAAATGATTTTTATACTATGTTCCTCTAACAAACGAGATATTAGAGCATGAAATAAAAATACCTAATTTCTCTAGTATGCTGTTTTATGCTGTTTGGGATAGAAATGGCTTCATCTGTTTTATATAGAAAGAAGAAACTGAGGTGGAGAGATAGAAAAATATCTTCCTAGGCCGGGCGCGGTGGCTCAAGCCTGTAATCCCAGCACTTTGGGAGGCCGAGACGGGTGGATCACGAGGTCAGGAGATCGAGACCATCCTGGTTAACACGGTGAAACCCCGTCTCTACTAAAAAATACAAAAAACTA…	GTTTGGGATAGAAATGGCTTCATCTGTTTTATATAGAAAGAAGAAACTGAGGTGGAGAGATAGAAAAATATCTTCCTAGGCCGGGCGCGGTGGCTCAAGCCTGTAATCCCAGCACTTTGGGAGGCCGAGACGGGTGGATCACGAGGTCAGGAGATCGAGACCATCCTGGTTAACACGGTGAAACCCCGTCTCTACTAAAAAATACAAAAAACTAGCCGGCCGAGGTGGCGGACGGCTGTAGTCCCCGCTACTCGGGCGGCGGAGGCAGGAGAATGGCGTGAACCCGGGAGGCGGAGCTTGCAGTGAGCTGATATCCGGCCACTGCACTCCAGCCTGGGTGACAGCGCGAGACTCCGTCTCAAAAAAAAAAAAAAAAAAAAAAAAAAAAAAAAAAAAAAA…	GTTTGGGATAGAAATGGCTTCATCTGTTTTATATAGAAAGAAGAAACTGAGGTGGAGAGATAGAAAAATATCTTCCTAGGCCGGGCGCGGTGGCTCAAGCCTGTAATCCCAGCACTTTGGGAGGCCGAGACGGGTGGATCACGAGGTCAGGAGATCGAGACCATCCTGGTTAACACGGTGAAACCCCGTCTCTACTAAAAAATACAAAAAACTAGCCGGCCGAGGTGGCGGACGGCTGTAGTCCCCGCTACTCGGGCGGCGGAGGCAGGAGAATGGCGTGAACCCGGGAGGCGGAGCTTGCAGTGAGCTGATATCCGGCCACTGCACTCCAGCCTGGGTGACAGCGCGAGACTCCGTCTCAAAAAAAAAAAAAAAAAAAAAAAAAAAAAAAAAAAAAAA…
7e2f9848-750d-43a7-92da-c4ce82cc2c77	Chr1	121410857	121410842	ALU	Alu_YRa4	0	269	-	-	N	CTCTTTCCACTTTTTT	Hippocampus.Single.WGS.ON22212.Neuron-#16|21,Hippocampus.Single.WGS.ON22212.Neuron-#17|1,Hippocampus.Single.WGS.ON22212.Neuron-#19|12,Hippocampus.Single.WGS.ON22212.Neuron-#7|1,Hippocampus.Single.WGS.ON22213.Neuron-#52|2,Liver.Bulk.WGS.ON22212|12,Liver.Bulk.WGS.ON22213|12,Hippocampus.Single.RC-seq.ON22212.Neuron-#16|7,Hippocampus.Single.RC-seq.ON22212.Neuron-#19|3,Hippocampus.Single.RC-seq.ON2221…	Hippocampus.Single.WGS.ON22212.Neuron-#16|14,Hippocampus.Single.WGS.ON22212.Neuron-#17|1,Hippocampus.Single.WGS.ON22212.Neuron-#19|16,Hippocampus.Single.WGS.ON22213.Neuron-#15|1,Hippocampus.Single.WGS.ON22213.Neuron-#39|1,Hippocampus.Single.WGS.ON22213.Neuron-#52|2,Liver.Bulk.WGS.ON22212|16,Liver.Bulk.WGS.ON22213|6,Hippocampus.Single.RC-seq.ON22212.Neuron-#16|10,Hippocampus.Single.RC-seq.ON22212.…	TGGATTTTTAAGAAAAAAAACTTACAATTTTTCTTCTTTTATTCTATGTATGTATTTCAAAATAAATAACTTAGGATTTAAACAAGAAGAATACATTAATTGGAAACAATAAATTTCATGATGAAGGCATTACTCTTTCCACTTTTTTTTTTTTTTTTTTTTTTTTTTTTTGTTGAGGGGTCCCTCTCGCTATGTCGCCCAGGCTGGTGTGCAGTGGCGCGATCTCGGCGCACGCAAG	AACCCATCTGTGGGAATTCCTCAGTTGCTAGTACAAGAACAATTAGAGGAGCTCATGTGAGCAGCTCTGCATCATTTCTTGGCTTCGACAAGCAGCAATGCGTATAACATTTCAACAATATCCTCAGAGGGAGTAATTTCAGAAACAACTGGGAAATACTCACCAAAGATGAAAGTCTGGCAAGAAAGTATTCCAACTCAGGAACTTGCTGCTTGTAATTTGAGGCATGAAACATTTTTAGGAATTGCTTAACACCATAGCATCGTTAAACCTTTAAAAAAGTGGAAAGAGGCCCGGCGCGGTGGCTCAAGCCTGTAATCCCAGCACTTTGGGAGGCCGAGGCGGGCGGATCACAAGGTCAGGAGATCGAGACCATCCTGGCTAACACAATGAAACCCT…	TAAACCTTTAAAAAAGTGGAAAGAGGCCCGGCGCGGTGGCTCAAGCCTGTAATCCCAGCACTTTGGGAGGCCGAGGCGGGCGGATCACAAGGTCAGGAGATCGAGACCATCCTGGCTAACACAATGAAACCCTGTCTCCACTAAAAATACAAAAAAATTAGCCGGGCGTGGTGGCGGCGCCTGTAGTCCCAGCTACTCGGGAGGCTGAGGCAGGAAGGGAATGGCGTGAACCCGGGAGGCTCGGAGCTTGCAGTGAGCCGAGATCGCGCCACTGCACTCCAGCCTGGGCGACAGAGCGAGACTCCGCCTCAAAAAAAAAAAAAAAAAAAAAAAGTGGAAAGAGTAATGCCTTCATCATGAAATTTATTTTTTCCAATTAATGTATTCTTCTTGTTTAAA…	TAAACCTTTAAAAAAGTGGAAAGAGGCCCGGCGCGGTGGCTCAAGCCTGTAATCCCAGCACTTTGGGAGGCCGAGGCGGGCGGATCACAAGGTCAGGAGATCGAGACCATCCTGGCTAACACAATGAAACCCTGTCTCCACTAAAAATACAAAAAAATTAGCCGGGCGTGGTGGCGGCGCCTGTAGTCCCAGCTACTCGGGAGGCTGAGGCAGGAAGGGAATGGCGTGAACCCGGGAGGCTCGGAGCTTGCAGTGAGCCGAGATCGCGCCACTGCACTCCAGCCTGGGCGACAGAGCGAGACTCCGCCTCAAAAAAAAAAAAAAAAAAAAAAAGTGGAAAGAGTAATGCCTTCATCATGAAATTTATTTTTTCCAATTAATGTATTCTTCTTGTTTAAA…
4eef5def-9522-4324-8090-b0e5bc415877	Chr1	121589306	121589289	ALU	Alu_YRb4	0	257	+	+	N	AAGAGTTGATAGCAGCTC	Hippocampus.Single.WGS.ON22212.Neuron-#10|71,Hippocampus.Single.WGS.ON22212.Neuron-#16|19,Hippocampus.Single.WGS.ON22212.Neuron-#21|1,Liver.Bulk.WGS.ON22212|12,Hippocampus.Single.RC-seq.ON22212.Neuron-#10|6,Hippocampus.Single.RC-seq.ON22212.Neuron-#16|2	Hippocampus.Single.WGS.ON22212.Neuron-#10|49,Hippocampus.Single.WGS.ON22212.Neuron-#16|4,Hippocampus.Single.WGS.ON22212.Neuron-#21|1,Liver.Bulk.WGS.ON22212|11,Hippocampus.Single.RC-seq.ON22212.Neuron-#10|10,Hippocampus.Single.RC-seq.ON22212.Neuron-#16|3	GTGAGCCACCGCGCCCGGCCGAGCTGCTATCAACTCTTGCCTGAATTAGAGGAAAGTGATTACTTCGGCCAAAATATCTTGCACCAAATCCACTGGCTCCTGATTACTGTGCACACTTATTTCTCTAGTCTCACTCTGTAAATCACTATGATCTGTAGACAGGGCCCTGCCAATGGAGTACTATTATCTTGCCTTCTTTTGGCTAATGATACAACCATTAGATTTCCAGTCAGTTGTCAAAACCTCAGAGAGGCCTGCCCTCACATCCTTGATCAGGTCAAATTCTCCTGCTTTAAGTAATCATGTATAA	CTATCCCTAACTCAACCCTGTTGGTGTGTTGTCCGTTTTTGTTTTTAACACCATTGAACACACGCCTGGTTTAAAGAGGGTTAATCTGTTAAAAAAAAAAAAAAAAAAAAAAAAAAAAAAAAGAGTTGATAGCAGCTCAAGTCACACATTGAAAGTCACAGACAAAAACTGCAATTACTTTTGCATCAACCTAATATTTTTGGCATTGGAGAGAAACAGAAAGATTTGAGAGAAATTTAGAAGAAAAACATTTAGAGAATTTAGTTCTG	GAGTGAGACTAGAGAAATAAGTGTGCACAGTAATCAGGAGCCAGTGGATTTGGTGCAAGATATTTTGGCCGAAGTAATCACTTTCCTCTAATTCAGGCAAGAGTTGATAGCAGCTCGGCCGGGCGCGGTGGCTCACGCTTGTAATCCCAGCACTTTGGGAGGCCGAGGTGGGCGGATCACGAGGTCAGGAGATCGAGACCACAGTGAAACCCCGTCTCTACTACAAATACAAAAAAAAAAATTAGCCTGGCGTGGTGGCGGGCGCCTGTAGTTCCAGCTACTTAGGAGGCTGAGGCAGGAGTAAATGGCCTGAACCCAGGAGGCGGAGCTTGCAGTGAGCCGAGATGGCGCCACTGCACTCCAGCCTGGGCTACAGAGGGAGACTCTGTCTCAAAAAAA…	GAGTGAGACTAGAGAAATAAGTGTGCACAGTAATCAGGAGCCAGTGGATTTGGTGCAAGATATTTTGGCCGAAGTAATCACTTTCCTCTAATTCAGGCAAGAGTTGATAGCAGCTCGGCCGGGCGCGGTGGCTCACGCTTGTAATCCCAGCACTTTGGGAGGCCGAGGTGGGCGGATCACGAGGTCAGGAGATCGAGACCACAGTGAAACCCCGTCTCTACTACAAATACAAAAAAAAAAATTAGCCTGGCGTGGTGGCGGGCGCCTGTAGTTCCAGCTACTTAGGAGGCTGAGGCAGGAGTAAATGGCCTGAACCCAGGAGGCGGAGCTTGCAGTGAGCCGAGATGGCGCCACTGCACTCCAGCCTGGGCTACAGAGGGAGACTCTGTCTCAAAAAAA…
18352170-504d-451a-8bac-e51f72caaa58	Chr1	123746202	123746189	ALU	Alu_YRa4	0	270	+	+	N	TAAACTGCTACTGA	Hippocampus.Single.WGS.ON22212.Neuron-#16|11,Hippocampus.Single.WGS.ON22212.Neuron-#19|13,Liver.Bulk.WGS.ON22212|10,Hippocampus.Single.RC-seq.ON22212.Neuron-#16|8,Hippocampus.Single.RC-seq.ON22212.Neuron-#19|2	Hippocampus.Single.WGS.ON22212.Neuron-#16|9,Hippocampus.Single.WGS.ON22212.Neuron-#19|11,Liver.Bulk.WGS.ON22212|9,Hippocampus.Single.RC-seq.ON22212.Neuron-#16|4,Hippocampus.Single.RC-seq.ON22212.Neuron-#19|1	AACCACTGCTCAAAGAAATCAAAGAGGACACAAACGAACAGAGAGACATTCCATGTCCACGGACAGGAAGGATCAATATCATGAAAATGGCCATACTGCCCAAAGTCATTTATAGATTCAATGCTATTCCCATTAAACTGCTACTGATTGCGGGCCGCGGTGGCTCAAGCCTGTAATCCCAGCACTTTGGGAGGCCGAGACGGGCGGATCACGAGGTCAGGAGATCGAGACCATCCTGGCCTGACACGGTGAAACCCTGTCT	GGCAGGAGAATGGCGTGAACCCGGGAGGCGGAGCTTGCAGTGAGCTGAGATCCGGCCACTGCACTCCAGCCTGGGTGGCAGAGCGAGACTCCGTCTCAAAAAAAAAAATAAATAAATAAATAAACTGCTACTGACATTCTTCACAGAATTAGGGGAAATAAAACTATTTTAAAATTCATGTGGAATCAAAAAAGAGTCTGAATAGCCAAGATAATCCTAAGCAGTAAGAACAAAGCTGGAGGCATCACGTTACCTGACTTCAAACTGT	AGAGACATTCCATGTCCACGGACAGGAAGGATCAATATCATGATAATGGCCATACTGCCCAAAGTCATTTATAGATTCAATGCTATTCCCATTAAACTGCTACTGATTGGCCGGGCGCGGTGGCTCAAGCCTGTAATCCCAGCACTTTGGGAGGCCGAGACGGGCGGATCACGAGGTCAGGAGATCGAGACCATCCTGGCCTGACACGGTGAAACCCTGTCTCTACTAAAAAATACAAAAAAAAAAACTAGCCGGGCGAGGTGGCGGGCGCCTGTAGTCCCAGCTACTTGGGAGGCTGAGGCAGGAGAATGGCGTGAACCCGGGAGGCGGAGCTTGCAGTGAGCTGAGATCCGGCCACTGCACTCCAGCCTGGGTGGCAGAGCGAGACTCCGTCTCAAA…	AGAGACATTCCATGTCCACGGACAGGAAGGATCAATATCATGATAATGGCCATACTGCCCAAAGTCATTTATAGATTCAATGCTATTCCCATTAAACTGCTACTGATTGGCCGGGCGCGGTGGCTCAAGCCTGTAATCCCAGCACTTTGGGAGGCCGAGACGGGCGGATCACGAGGTCAGGAGATCGAGACCATCCTGGCCTGACACGGTGAAACCCTGTCTCTACTAAAAAATACAAAAAAAAAAACTAGCCGGGCGAGGTGGCGGGCGCCTGTAGTCCCAGCTACTTGGGAGGCTGAGGCAGGAGAATGGCGTGAACCCGGGAGGCGGAGCTTGCAGTGAGCTGAGATCCGGCCACTGCACTCCAGCCTGGGTGGCAGAGCGAGACTCCGTCTCAAA…
787225ca-879f-40ac-a0d6-356ed7307c20	Chr1	124493382	124493397	ALU	Alu_YRa4	0	270	+	+	N	AAAAATTATTTGGTAG	Hippocampus.Single.WGS.ON22212.Neuron-#19|1,Hippocampus.Single.WGS.ON22212.Neuron-#21|3,Hippocampus.Single.WGS.ON22212.Neuron-#7|4,Liver.Bulk.WGS.ON22212|6,Hippocampus.Single.RC-seq.ON22212.Neuron-#19|2,Hippocampus.Single.RC-seq.ON22212.Neuron-#7|2	Hippocampus.Single.WGS.ON22212.Neuron-#19|5,Hippocampus.Single.WGS.ON22212.Neuron-#21|1,Hippocampus.Single.WGS.ON22212.Neuron-#7|7,Liver.Bulk.WGS.ON22212|16,Hippocampus.Single.RC-seq.ON22212.Neuron-#19|1,Hippocampus.Single.RC-seq.ON22212.Neuron-#21|1,Hippocampus.Single.RC-seq.ON22212.Neuron-#7|3	GCTGTGGCAGGAGAATGGCGTGAACCCGTGAGGGGGAGCTTGGAGTGAGCTGAGATCCGGCCACTGCACTCCAGCCTGGGTGACAGAGCAAGAATCCGTCTAAAAAAAAAAAAAAAAAAAAAAAATTATTTGGTAGATGTGAGTTTACATTCTTTTTTTTTTTTTTTTTTTTTTTTTTTAAACAGCATCTTGCTCTGTCACAGAGGCTGGAGTGCAGTGGCATAATCGTAGCTCACTGAAGTTTCCATTTCCCACGGCTCA	ATTAATATGATCCAATGATATTAACACAATCACATATTTGATAAAAAGTAAGCACAATGCTTAAGAGTATAAGTATTTTAGTTATATTATTGATTAACAATGTGCTAAATTCTAATATGCCTAATCTTGTCAAGAAGGCAGAATTGCCTTCTTGTTTGATTATTGATTTATTCAACACTTAGCTACTTATGTGCAAATGCTATATTCAAGATGACATTAGGAGTTGTGCAGTGTTTAAAAATTATTTGGTAGGCCGGGCGCAGTGGCTCAAGCCTGTAATCCCAGCACTTTGGGAGGCCGAGACGGGCGGATCATGAGGTCAGGAGATCGAGACCATCCTGGCTAATACGGTGAAACCCCGTCTCTACTAAAAAATACAAAAAACTAGCCAGGTGAAGT…	CTTAGCTACTTATGTGCAAATGCTATATTCAAGATGACATTAGGAGTTGTGCAGTGTTTAAAAATTATTTGGTAGGCCGGGCGCAGTGGCTCAAGCCTGTAATCCCAGCACTTTGGGAGGCCGAGACGGGCGGATCATGAGGTCAGGAGATCGAGACCATCCTGGCTAATACGGTGAAACCCCGTCTCTACTAAAAAATACAAAAAACTAGCCAGGTGAAGTGGCGGGCGTGCCTGTAGTCCCAGCTACTCGGGAGGCTGAGGCAGGAGAATGGCGTGTACCCGAGAGGGGGAGCTTGCAGTGAGCTACGATTATGCCACTGCACTCCAGCCTCTGTGACAGAGCAAGACTCCGTCTCAAAAAAAAAAAAAAAAAAAAAAATTATTTGGTAGATGTGAG…	CTTAGCTACTTATGTGCAAATGCTATATTCAAGATGACATTAGGAGTTGTGCAGTGTTTAAAAATTATTTGGTAGGCCGGGCGCAGTGGCTCAAGCCTGTAATCCCAGCACTTTGGGAGGCCGAGACGGGCGGATCATGAGGTCAGGAGATCGAGACCATCCTGGCTAATACGGTGAAACCCCGTCTCTACTAAAAAATACAAAAAACTAGCCAGGTGAAGTGGCGGGCGTGCCTGTAGTCCCAGCTACTCGGGAGGCTGAGGCAGGAGAATGGCGTGTACCCGAGAGGGGGAGCTTGCAGTGAGCTACGATTATGCCACTGCACTCCAGCCTCTGTGACAGAGCAAGACTCCGTCTCAAAAAAAAAAAAAAAAAAAAAAATTATTTGGTAGATGTGAG…
f07880bd-1199-4cd5-8f5f-3c9f06df9b96	Chr1	128220208	128220197	ALU	Alu_YRc2	0	270	-	-	N	AAATATACTTTT	Hippocampus.Single.WGS.ON22212.Neuron-#10|3,Hippocampus.Single.WGS.ON22212.Neuron-#16|13,Hippocampus.Single.WGS.ON22212.Neuron-#21|1,Hippocampus.Single.WGS.ON22212.Neuron-#7|2,Liver.Bulk.WGS.ON22212|19,Liver.Bulk.WGS.ON22213|7,Hippocampus.Single.RC-seq.ON22212.Neuron-#16|4,Hippocampus.Single.RC-seq.ON22212.Neuron-#7|3	Hippocampus.Single.WGS.ON22212.Neuron-#10|24,Hippocampus.Single.WGS.ON22212.Neuron-#16|19,Hippocampus.Single.WGS.ON22212.Neuron-#21|1,Hippocampus.Single.WGS.ON22212.Neuron-#7|8,Hippocampus.Single.WGS.ON22213.Neuron-#14|1,Liver.Bulk.WGS.ON22212|16,Liver.Bulk.WGS.ON22213|8,Hippocampus.Single.RC-seq.ON22212.Neuron-#10|4,Hippocampus.Single.RC-seq.ON22212.Neuron-#16|7,Hippocampus.Single.RC-seq.ON22212…	TTGACTAGCTAATGTTTTATTTAGGATTTTCACATCAGATGTTTTTCTATGAAATGGAACTTTTCTCTACTTGAATTATTCTATTTTGCTTTGATGCTTTTATTGAAAACTCTAGAAAATATTTTCACGTGAGTTAAAATATACTTTTTTTTTTTTTTTTTTTTTTTTTTTTTTTTTTGTTTGATTCGTGTTTTTGTTTTTTTGCCCCGGCTTGGGTGGGTGTGCCGGATCGCCACGCCCCGCCAGGTCCGC	TTTTTTTTTTTTTTTTTTTTTTTTTTTTGAGACGGAGTCTGGCTCTGTCGCCCGGGCTGGAGTGCAGTGGCCGGATCTCAGCTCACTGCAAGCTCCGCCTCCCGGGTTTACGCCATTCTCCTGCCTCAGCCTCCCGAGTAGCTGGGACTACAGGCGCCCGCCGCCTCGCCCGGCTAGTTTTTTGTATTTTTTAGTAGAGACGGGGTTTCACCGTGTTCGCCAGGATGGTCTCCATCTCCTGACCTAGTGATCCGCCCGTCTCGGCCTCCCAAAGTGCTGGGATTACAGGCTTGAGCCACCGCGCCCGGCCAAATATACTTTTAAAGTATACCTCATTTACCGTGATATTATTATTAGTCATTCCTCGCCTGTATGAAAATATCTCATGTACCCTATAAA…	AGGAATGACTAATAATAATATCACGGTAAATGAGGTATACTTTAAAAGTATATTTGGCCGGGCGCGGTGGCTCAAGCCTGTAATCCCAGCACTTTGGGAGGCCGAGACGGGCGGATCACTAGGTCAGGAGATGGAGACCATCCTGGCGAACACGGTGAAACCCCGTCTCTACTAAAAAATACAAAAAACTAGCCGGGCGAGGCGGCGGGCGCCTGTAGTCCCAGCTACTCGGGAGGCTGAGGCAGGAGAATGGCGTAAACCCGGGAGGCGGAGCTTGCAGTGAGCTGAGATCCGGCCACTGCACTCCAGCCCGGGCGACAGAGCCAGACTCCGTCTCAAAAAAAAAAAAAATGTAGATTGG	AGGAATGACTAATAATAATATCACGGTAAATGAGGTATACTTTAAAAGTATATTTGGCCGGGCGCGGTGGCTCAAGCCTGTAATCCCAGCACTTTGGGAGGCCGAGACGGGCGGATCACTAGGTCAGGAGATGGAGACCATCCTGGCGAACACGGTGAAACCCCGTCTCTACTAAAAAATACAAAAAACTAGCCGGGCGAGGCGGCGGGCGCCTGTAGTCCCAGCTACTCGGGAGGCTGAGGCAGGAGAATGGCGTAAACCCGGGAGGCGGAGCTTGCAGTGAGCTGAGATCCGGCCACTGCACTCCAGCCCGGGCGACAGAGCCAGACTCCGTCTCAAAAAAAAAAAAAATGTAGATTGG
fe95910d-d492-4a5f-93d6-47cec0d40d7e	Chr1	130067180	130067192	ALU	Alu_YRa4	0	269	-	-	N	CAGGGCAGTTTCT	Hippocampus.Single.WGS.ON22212.Neuron-#16|5,Hippocampus.Single.WGS.ON22212.Neuron-#17|2,Hippocampus.Single.WGS.ON22212.Neuron-#19|3,Hippocampus.Single.WGS.ON22212.Neuron-#21|29,Liver.Bulk.WGS.ON22212|20,Hippocampus.Single.RC-seq.ON22212.Neuron-#21|9	Hippocampus.Single.WGS.ON22212.Neuron-#16|5,Hippocampus.Single.WGS.ON22212.Neuron-#19|1,Hippocampus.Single.WGS.ON22212.Neuron-#21|20,Liver.Bulk.WGS.ON22212|24,Hippocampus.Single.RC-seq.ON22212.Neuron-#16|2,Hippocampus.Single.RC-seq.ON22212.Neuron-#21|6	TTTTAGTAGAGACGGGGTTTCACCGTGTTAGCCAGGATGGTCTCGATCTCCTGACCTCGTGATCCGCCCGTCTCGGCCTCCCAAAGTGCTGGGATTACAGGCTTGAGCCACCGCGCCCGGCCAGGGCAGTTTCTAGCATTGCCTCTTCTCCCTGCAGTTTGCTCATGGAGTACCGGACCTGGCGCTGAAGGACATCGCCTGCAGTGAGGCCCTCCTGGAGCGCTTCATCATCTTTAGCCAGCGACGCGGGGCACAGACCGTGCGCTAT	AAATATTCTCCTTATTTTAAAATCAGTTAATTAGTGGCTTTAATCTCATCTGCGATCTTAATTCCCATTGCCATGTAACATAAGGTATTCCCATGTTCTGTGGGTTAGGACGTGGCTGTCTTTCCTACCACAGGGCAGTTTCTTTTTTTTTTTTTTTTTTTTTGAGTATAACG	GCCAGGTCCGGTACTCCATGAGCAAACTGCAGGGAGAAGAGGCAATGCTAGAAACTGCCCTGGCCGGGCGCGGTGGCTCAAGCCTGTAATCCCAGCACTTTGGGAGGCCGAGACGGGCGGATCACGAGGTCAGGAGATCGAGACCATCCTGGCTAACACGGTGAAACCCCGTCTCTACTAAAAAATACAGAAAACTAGCCGGGCGCGGTGGCGGGCGCCTGTAGTCCCAACTACTCGGGAGGCTGAGGCAGGAGAATGGCGTGAACCTGGGAGGTGGAGCTTGCAGTGAGCTGAGATCTGGCCACTGCACTCCAGCCTGGGCGACAGAGCGAGACTCCGTCTCAAAAAAAAAAAAAAAAAAAAAGTAAACTGCCCTGTGGTAGGAAAGACAGCCACGTC…	GCCAGGTCCGGTACTCCATGAGCAAACTGCAGGGAGAAGAGGCAATGCTAGAAACTGCCCTGGCCGGGCGCGGTGGCTCAAGCCTGTAATCCCAGCACTTTGGGAGGCCGAGACGGGCGGATCACGAGGTCAGGAGATCGAGACCATCCTGGCTAACACGGTGAAACCCCGTCTCTACTAAAAAATACAGAAAACTAGCCGGGCGCGGTGGCGGGCGCCTGTAGTCCCAACTACTCGGGAGGCTGAGGCAGGAGAATGGCGTGAACCTGGGAGGTGGAGCTTGCAGTGAGCTGAGATCTGGCCACTGCACTCCAGCCTGGGCGACAGAGCGAGACTCCGTCTCAAAAAAAAAAAAAAAAAAAAAGTAAACTGCCCTGTGGTAGGAAAGACAGCCACGTC…
d91ab32a-094a-4f68-9122-81c7b257dd98	Chr1	130735211	130735199	ALU	Alu_YRa4	0	269	+	+	N	AAGAAACAAGGTA	Hippocampus.Single.WGS.ON22213.Neuron-#23|4,Hippocampus.Single.WGS.ON22213.Neuron-#52|4,Liver.Bulk.WGS.ON22213|13	Hippocampus.Single.WGS.ON22213.Neuron-#14|2,Hippocampus.Single.WGS.ON22213.Neuron-#23|5,Hippocampus.Single.WGS.ON22213.Neuron-#39|3,Hippocampus.Single.WGS.ON22213.Neuron-#52|12,Liver.Bulk.WGS.ON22213|20,Hippocampus.Single.RC-seq.ON22213.Neuron-#23|1,Hippocampus.Single.RC-seq.ON22213.Neuron-#39|1,Hippocampus.Single.RC-seq.ON22213.Neuron-#52|1	GAGTCTCGCTCTGTCGCCCAGGCTGGAGTGCAGTGGCCGGATCTCAGCTCACTGCAAGCTCCGCCTCCCGGGTTTACGCCATTCTCCTGCCTCAGCCTCCCGAGTAGCTGGGACTACAGGCACCCGCCACCGCGCCCGGCTAGTTTTTTGTATTTTTTAGTAGAGACGGGGTTTCATCGTGTTAGCCAGGATGGTCTCGATCTCCTGACCTCATGATCCGCCCGTCTCGGCCTCCCAAAGTGCTGGGATTACAGGCTTGAGCCACCGCGCCCGGCCTACCTTGTTTCTTAATTAGATTACTGACTTTAGGGTGGAGCCTTTTAATGAATAGAGCAAAGAAAGCACTTGCAGTTTACTTTTCACATATTTAAGTATTAATATTTAAGTATGTGAAAGCAG…	GGCGTAAACCCGGGAGGCGGTGCTTGCAGTGAGCTGAGATCCGGCCACTACACTCCAGCCTGGGCGACAGAGCGAGACACCGTATAAAAAAAAAAAAAAAAAAAAAAAAAAAAGAAACAAGGTAAACTGAAAATACCTATGTAACTAGTCTGCCAAAATTTGAGTTGCTGGCATTAGCTGGCTATTTTCAAACTCTTTGTAAAAGAAATTTACATCTATAAAAGGAACCTCCAATTTTAAGGGCATCTCCCTTA	TAAATATTAATACTTAAATATGTGAAAAGTAAACTGCAAGTGCTTTCTTTGCTCTATTCATTAAAAGGCTCCACCCTAAAGTCAGTAATCTAATTAAGAAACAAGGTAGGCCGGGCGCGGTGGCTCAAGCCTGTAATCCCAGCACTTTGGGAGGCCGAGACGGGCGGATCATGAGGTCAGGAGATCGAGACCATCCTGGCTAACACGATGAAACCCCGTCTCTACGTATAAAAAATACAAAAAACTAGCCGGGCGCGGTGGCGGGTGCCTGTAGTCCCAGCTACTCGGGAGGCTGAGGCAGGAGAATGGCGTAAACCCGGGAGGCGGAGCTTGCAGTGAGCTGAGATCCGGCCACTGCACTCCAGCCTGGGCGACAGAGCGAGACTCCGTCTCAAAAAA…	TAAATATTAATACTTAAATATGTGAAAAGTAAACTGCAAGTGCTTTCTTTGCTCTATTCATTAAAAGGCTCCACCCTAAAGTCAGTAATCTAATTAAGAAACAAGGTAGGCCGGGCGCGGTGGCTCAAGCCTGTAATCCCAGCACTTTGGGAGGCCGAGACGGGCGGATCATGAGGTCAGGAGATCGAGACCATCCTGGCTAACACGATGAAACCCCGTCTCTACGTATAAAAAATACAAAAAACTAGCCGGGCGCGGTGGCGGGTGCCTGTAGTCCCAGCTACTCGGGAGGCTGAGGCAGGAGAATGGCGTAAACCCGGGAGGCGGAGCTTGCAGTGAGCTGAGATCCGGCCACTGCACTCCAGCCTGGGCGACAGAGCGAGACTCCGTCTCAAAAAA…
925c8b2c-60ba-4477-bcba-ee4d84bd22fd	Chr1	131962657	131962643	ALU	Alu_YRb4	0	258	+	+	N	TAAAAAGACACTCTT	Hippocampus.Single.WGS.ON22212.Neuron-#19|2,Hippocampus.Single.WGS.ON22212.Neuron-#21|12,Liver.Bulk.WGS.ON22212|27,Hippocampus.Single.RC-seq.ON22212.Neuron-#19|1,Hippocampus.Single.RC-seq.ON22212.Neuron-#21|6	Hippocampus.Single.WGS.ON22212.Neuron-#10|1,Hippocampus.Single.WGS.ON22212.Neuron-#19|3,Hippocampus.Single.WGS.ON22212.Neuron-#21|16,Liver.Bulk.WGS.ON22212|30,Hippocampus.Single.RC-seq.ON22212.Neuron-#21|8,Hippocampus.Single.RC-seq.ON22213.Neuron-#69|1	CCAGCCTGGGCAACACAGTGAGACTCCGTCTCAAAAAAAAAACCAAAAAAACAAAAAAACAAAACTTCCTCCTTCCAAAGATGCTTTTGTATCAAAACTGCACTTGTACCACCTAAATTTATAAAAATGTTTAAAAAGACACTCTTGGCCGGGCGCGGCGGCTCACGCCTGTAATCCCAGCACTTTGGGAGGCCGAGACGGGCGGATCATGAGGTCAGGAGATCGAGACCATCCTGGCTAACACTGGGGT	AGGCTGAGGCAGGAGAATGGCGTGAACCCGGGAGGCGGAGCTTGCAGTGAGCTGAGATCCGGCCACTGCACTCCAGCCTGGGCGACAGAGCGAGACTCCGTCTCAAAAATAAAATAAAATAAAAAGACACTCTTAAGGGGAATAAAAAGACAAGCTAGAGACTGGAAGAAAATAACTGCAAAGCAAATATCTGGTAAATGACTTGTATCCCGAATATATTTTTAAAGACTCTCAAGGCTTGGGCTGGGCAAGGTGGCTCACGCCT	AAAAACAAAACTTCCTCCTTCCAAAGATGCTTTTGTATCAAAACTGCACTTGTACCACCTAAATTTATAAAAATGTTTAAAAAGACACTCTTGGCCGGGCGCGGCGGCTCACGCCTGTAATCCCAGCACTTTGGGAGGCCGAGACGGGCGGATCATGAGGTCAGGAGATCGAGACCATCCTGGCTAACACGGTGAAAACCCGTCTCTACTAAAAAATACAAAAAACTAGCCGGGCGCGGTGGCGGGCGCCTGTAGTCCCAGCTACTCGGGAGGCTGAGGCAGGAGAATGGCGTGAAAACCCGGGAGGCGGAGCTTGCAGTGAGCCGAGATCACGCCACTGCACTCCAGCCTGGGTGACACAGCGAGACTCCGTCTCAAAAATAAAATAAAATAAAAAGA…	AAAAACAAAACTTCCTCCTTCCAAAGATGCTTTTGTATCAAAACTGCACTTGTACCACCTAAATTTATAAAAATGTTTAAAAAGACACTCTTGGCCGGGCGCGGCGGCTCACGCCTGTAATCCCAGCACTTTGGGAGGCCGAGACGGGCGGATCATGAGGTCAGGAGATCGAGACCATCCTGGCTAACACGGTGAAAACCCGTCTCTACTAAAAAATACAAAAAACTAGCCGGGCGCGGTGGCGGGCGCCTGTAGTCCCAGCTACTCGGGAGGCTGAGGCAGGAGAATGGCGTGAAAACCCGGGAGGCGGAGCTTGCAGTGAGCCGAGATCACGCCACTGCACTCCAGCCTGGGTGACACAGCGAGACTCCGTCTCAAAAATAAAATAAAATAAAAAGA…
3802899a-9a0f-4da5-b889-14cc545a5c74	Chr1	132120355	132120370	ALU	Alu_YRa4	0	270	+	+	N	AAAAAAGCATATTCAT	Hippocampus.Single.WGS.ON22212.Neuron-#17|7,Hippocampus.Single.WGS.ON22212.Neuron-#21|12,Liver.Bulk.WGS.ON22212|15,Hippocampus.Single.RC-seq.ON22212.Neuron-#17|3,Hippocampus.Single.RC-seq.ON22212.Neuron-#19|3	Hippocampus.Single.WGS.ON22212.Neuron-#17|4,Hippocampus.Single.WGS.ON22212.Neuron-#21|6,Liver.Bulk.WGS.ON22212|15,Hippocampus.Single.RC-seq.ON22212.Neuron-#19|1	TATGGGTAGGCTTATGCCTGATAATGCCTTAAACCCGGGAGGCGTTGATTGCATTGACCCTATATCGCCACACTTAACTCAAGCCTGGTTTTCATTCCCATACTCCGTGTCAAAAAAAAAAAAAAAAAAGCATATTCATTTAGTTATATTTGCCTTCAAACTAATAGATATACTATAAATCCAAAAGAGATTTGATAATATAACTTTTTAATGGTTAAAAGTAGTAAAAAGAACTTTTGAATAAAATAGAATGAAAATTTATATATCAATTTG	AGCCTCATGAGTAGCCGGGACTTCAGGTGTGCACCTCTACGCCTGCCTACTTTTATTTTTTATTTATTTTTGGTAGAGTCAAGGTTTCACCATGTTGACCAGGCTGGTCTCAAACTCCTGGCCTCAAGTGATTCTCCCGCCTTGGTTTCCCAGAGTGCTGAGATTACAGGCATGAGCCACCACGCCCAGTCAAGATGTCAGCTTTAAAAAATGGTTTAATGTTCCCAGTATAAATAGTATATGGCCCATTTTAAAAATGCATATTCATGGCCGGGCGCGGTGGCTCAAGCCTGTAATCCCAGCACTTTGGGAGGCCGAGACGGGCGGATCACGGGGTCAGGAGATCGAGACCATCCTGGCTAACACGGTGAAACCCCATCTCTACTAAAAAATACAAAA…	CCCAGAGTGCTGAGATTACAGGCATGAGCCACCACGCCCAGTCAAGATGTCAGCTTTAAAAAATGGTTTAATGTTCCCAGTATAAATAGTATATGGCCCATTTTAAAAATGCATATTCATGGCCGGGCGCGGTGGCTCAAGCCTGTAATCCCAGCACTTTGGGAGGCCGAGGTAAGAAGATAGCTTGTGTCCGGGAGCTTGAGGTTGCAGTGAACCATGATTGGGCCATTGCACTC	CCCAGAGTGCTGAGATTACAGGCATGAGCCACCACGCCCAGTCAAGATGTCAGCTTTAAAAAATGGTTTAATGTTCCCAGTATAAATAGTATATGGCCCATTTTAAAAATGCATATTCATGGCCGGGCGCGGTGGCTCAAGCCTGTAATCCCAGCACTTTGGGAGGCCGAGGTAAGAAGATAGCTTGTGTCCGGGAGCTTGAGGTTGCAGTGAACCATGATTGGGCCATTGCACTC
f143f136-d7af-4c79-a4b5-08b6f51009d1	Chr1	132124277	132124267	ALU	Alu_YRc2	0	270	+	+	N	AACAGTTTCCT	Hippocampus.Single.WGS.ON22213.Neuron-#69|3,Hippocampus.Single.WGS.ON22213.Neuron-#31|1,Hippocampus.Single.WGS.ON22213.Neuron-#52|2,Liver.Bulk.WGS.ON22213|17,Hippocampus.Single.RC-seq.ON22213.Neuron-#52|1	Hippocampus.Single.WGS.ON22213.Neuron-#25|1,Hippocampus.Single.WGS.ON22213.Neuron-#31|2,Hippocampus.Single.WGS.ON22213.Neuron-#52|1,Liver.Bulk.WGS.ON22213|13,Hippocampus.Single.RC-seq.ON22213.Neuron-#31|1	CTATATAGAATTCCATCATATGATTATACTGCAATTGATCCATTCTTCTGTTAAAAGACATTTTAAAATGTCCATTTTGATAATTCAAATAATAACCAAATTCATTCTTGTACACATCCACTTATGCGCATGTACAACAGTTTCCTGGCCGGGCGCGGTGGCTCAAGCCTGTAATCCCAGCACTTTGGGAGGCCGAGACGGGCGGATCACAAGGTCAGGAGATCGAGACCATCCTGGCTAACACGGCGAAACCCCGTCTCTACT	GGCAGGAGAATGGCGGGAACCCGGGAGGCGGAGCTTGCAGTGAGCTGAGATCTGGCCACTGCACTCCAGCCTGGGCGACAGAGCAAGACTCCGTCTCAAAAAAAAAAAAAAAAAAAAAAAAAACAGTTTCCTTACAGTACATCCCCAGAAATAGAACTGCTTTTCAGAGTATATACATCCTCAACCTTACTTGATATTTGTCAAATTGTTTTTTAAACTGATTGTATGTTCCACAAGCAGCATTTAAAAATTCTCTTTGCTCTACTTC	CCATTCTTCTGTTAAAAGACATTTTAAAATGTCCATTTTGATAATTCAAATAATAACCAAATTCATTCTTGTACACATCCACTTATGCGCATGTACAACAGTTTCCTGGCCGGGCGCGGTGGCTCAAGCCTGTAATCCCAGCACTTTGGGAGGCCGAGACGGGCGGATCACAAGGTCAGGAGATCGAGACCATCCTGGCTAACACGGCGAAACCCCGTCTCTACTAAAAACACAAAAAATTAGCCGGGCGAGGTGGCGGCGCCTGTGGTCCCAGCTACTCGGGAGGCTGAGGCAGGAGAATGGCGGGAACCCGGGAGGCGGAGCTTGCAGTGAGCTGAGATCTGGCCACTGCACTCCAGCCTGGGCGACAGAGCAAGACTCCGTCTCAAAAAAAAAAAA…	CCATTCTTCTGTTAAAAGACATTTTAAAATGTCCATTTTGATAATTCAAATAATAACCAAATTCATTCTTGTACACATCCACTTATGCGCATGTACAACAGTTTCCTGGCCGGGCGCGGTGGCTCAAGCCTGTAATCCCAGCACTTTGGGAGGCCGAGACGGGCGGATCACAAGGTCAGGAGATCGAGACCATCCTGGCTAACACGGCGAAACCCCGTCTCTACTAAAAACACAAAAAATTAGCCGGGCGAGGTGGCGGCGCCTGTGGTCCCAGCTACTCGGGAGGCTGAGGCAGGAGAATGGCGGGAACCCGGGAGGCGGAGCTTGCAGTGAGCTGAGATCTGGCCACTGCACTCCAGCCTGGGCGACAGAGCAAGACTCCGTCTCAAAAAAAAAAAA…
ee733e04-89f9-45ec-b03d-64666b8e1f72	Chr1	132137226	132137212	ALU	Alu_YRa4	0	269	+	+	N	AAAAAGAAAGTTTCA	Hippocampus.Single.WGS.ON22212.Neuron-#21|1,Hippocampus.Single.WGS.ON22212.Neuron-#37|45,Liver.Bulk.WGS.ON22212|12,Hippocampus.Single.RC-seq.ON22212.Neuron-#37|1	Hippocampus.Single.WGS.ON22212.Neuron-#37|31,Hippocampus.Single.WGS.ON22213.Neuron-#39|2,Liver.Bulk.WGS.ON22212|8	AGAGGCAGAGTTTCGCCATGTTGGCCAGGCCAGTTTCGAACTCCTGACCTCAGGTGATCTGCCCACCTTGGCCTCCCAAACTGCTGGGATTACAGGCATGAGCCACTGCGCCTGGCCTTATACACTTTAAATAAAAAGAAAGTTTCATGGCCGGGGTGCGGTGGCTCAAGCCTGTAATCCCAGCACTTTGGGAGGCCGAGACCGGGCGGATCACGAGGTCAGTGGAGATCGAGACCATCCTGGCTGACACGGTGAAACCCCGTCTCTACTAA	GGGGGGGTATGGGGTCCACCCGGGTGGCCGGTGGGTCCCGTCTCCTGTCTATTGCCACAAACCCCCCCCCCGGGGGCCACCTAGTCCCCCCCTCACAAAAAAAAAAAAAAAAAAAAAAAAAAAAAGAAAGTTTCACTTTATGAAATCTTGACTCAAAAGGGAACAGGAAGCCCAAACGACACTAGCGTTTCCGCCAAGGTCATTATCAGTGACCTACCACTTTTCCTAGGAATACACTTCTTCAACCCACCACACACTGGTGGTAAACT	GAACTCCTGACCTCAGGTGATCTGCCCACCTTGGCCTCCCAAACTGCTGGGATTACAGGCATGAGCCACTGCGCCTGGCCTTATACACTTTAAATAAAAAGAAAGTTTCATGGCCGGGTGCGGTGGCTCAAGCCTGTAATCCCAGCACTTTGGGAGGCCGAGACGGGCGGATCACGAGGTCAGTGGAGAGATCTCGAGACCATCCTGGCTGACACGGTGAAACCCCGTCTCTACTAAAAAATACAAAAACTTAGCCGGGCGAGGTGGCGGGCGCCTGTAGTCCCACCTACTCGGGAGGCTGAGGCGGGGGAATGGCGTAAACCCGGGAGGCGGAGCTTGCAGTGAGCTGAGATCTGGCCACTACACTCCAGCCTGGGCGACAGAGCGAGACTCCGTCTC…	GAACTCCTGACCTCAGGTGATCTGCCCACCTTGGCCTCCCAAACTGCTGGGATTACAGGCATGAGCCACTGCGCCTGGCCTTATACACTTTAAATAAAAAGAAAGTTTCATGGCCGGGTGCGGTGGCTCAAGCCTGTAATCCCAGCACTTTGGGAGGCCGAGACGGGCGGATCACGAGGTCAGTGGAGAGATCTCGAGACCATCCTGGCTGACACGGTGAAACCCCGTCTCTACTAAAAAATACAAAAACTTAGCCGGGCGAGGTGGCGGGCGCCTGTAGTCCCACCTACTCGGGAGGCTGAGGCGGGGGAATGGCGTAAACCCGGGAGGCGGAGCTTGCAGTGAGCTGAGATCTGGCCACTACACTCCAGCCTGGGCGACAGAGCGAGACTCCGTCTC…
bc1e59dc-981b-42f4-8095-70da7acb7a1e	Chr1	133167456	133167471	ALU	Alu_YRa4	0	270	+	+	N	AAAAATGATGCCCAGT	Hippocampus.Single.WGS.ON22212.Neuron-#17|2,Hippocampus.Single.WGS.ON22212.Neuron-#21|16,Hippocampus.Single.WGS.ON22213.Neuron-#71|1,Hippocampus.Single.WGS.ON22213.Neuron-#31|1,Hippocampus.Single.WGS.ON22213.Neuron-#39|1,Hippocampus.Single.WGS.ON22213.Neuron-#52|4,Hippocampus.Single.WGS.ON22213.Neuron-#49|1,Liver.Bulk.WGS.ON22212|20,Liver.Bulk.WGS.ON22213|16,Hippocampus.Single.RC-seq.ON22212.Neur…	Hippocampus.Single.WGS.ON22212.Neuron-#17|2,Hippocampus.Single.WGS.ON22212.Neuron-#21|7,Hippocampus.Single.WGS.ON22213.Neuron-#31|2,Hippocampus.Single.WGS.ON22213.Neuron-#39|4,Hippocampus.Single.WGS.ON22213.Neuron-#52|1,Liver.Bulk.WGS.ON22212|9,Liver.Bulk.WGS.ON22213|11,Hippocampus.Single.RC-seq.ON22212.Neuron-#17|2,Hippocampus.Single.RC-seq.ON22213.Neuron-#39|1	TGTGGATGGTTATTGGCTAAAAACCCCGGGGGGCGGTGCTGGCTGTGAGCTTTGTCCGGCCCATTGCACACAAGCCTCGGCCACACAGCTTTACCCCTTCAAAAAAAAAAAAAAAAAAAAAAAAAAAATGATGCCCAGTTTTCCGACATTAGCAACTGGGAGAAAAGTAGGGCCTCGTTTGGGTAGATATTCTGAAGGAAAAGCAAGTTTGCTGGAATAGGGAACAGGATACGAGT	AGTGACATGATCAAAATTGTATTTTATAAAGGTCACTCTGACTGCAATGTAGAAAAGGGATTAGAGGATGATAGAATAGGAACAAAGGGACTCATTAGGTGGTTTTTATAATAATCTAAGCAAAATAATGGCCTAGTTTAGGGTAGTGGCAATAGCAATGGAGAGAAGTGACTAGGTTAAATTATTTTTCAGAGGTAGAATCGCTACCTTGCTACTTCATTGGCTATAAGAGACAAAGTAGAAGGAGCAGTCAAAAATGATGCCCAGCCTGGCCGGGCGCGGTGGCTCAAGCCTGTAATCCCAGCACTTTGGGAGGCCGAGACGGGCGGATCACGAGGTCAGGAGTTCGAGACCATCCTGGCTAACACGGTGAAACCCCATCTCTACTAAAAAATACGA…	GCAATGGAGAGAAGTGACTAGGTTAAATTATTTTTCAGAGGTAGAATCGCTACCTTGCTACTTCATTGGCTATAAGAGACAAAGTAGAAGGAGCAGTCAAAAATGATGCCCAGCCTGGCCGGGCGCGGTGGCTCAAGCCTGTAATCCCAGCACTTTGGGAGGCCGAGACGGGCGGATCACGAGGTCAGGAGTTCGAGACCATCCTGGCTAACACGGTGAAACCCCATCTCTACTAAAAAATACGAAAAACTAGCCGGGCGAGGTGGCGGGCGCCTGTAGTCCCGGCTACTCGGGAGGCTGAGGCAGGAGAATGGCGTAAAAACCCGGGAGGCGGAGCTTGCAGTGAGCTGAGATCCGGCCACTGCACTCCAGCCTAGGCGACACAGCGAGACTCCGTCT…	GCAATGGAGAGAAGTGACTAGGTTAAATTATTTTTCAGAGGTAGAATCGCTACCTTGCTACTTCATTGGCTATAAGAGACAAAGTAGAAGGAGCAGTCAAAAATGATGCCCAGCCTGGCCGGGCGCGGTGGCTCAAGCCTGTAATCCCAGCACTTTGGGAGGCCGAGACGGGCGGATCACGAGGTCAGGAGTTCGAGACCATCCTGGCTAACACGGTGAAACCCCATCTCTACTAAAAAATACGAAAAACTAGCCGGGCGAGGTGGCGGGCGCCTGTAGTCCCGGCTACTCGGGAGGCTGAGGCAGGAGAATGGCGTAAAAACCCGGGAGGCGGAGCTTGCAGTGAGCTGAGATCCGGCCACTGCACTCCAGCCTAGGCGACACAGCGAGACTCCGTCT…
bd297662-52c2-4619-89ed-dfab853985a9	Chr1	134020490	134020508	L1	L1_RS2	0	6299	-	-	N	CCTCTGCCTTTTAGTTTTT	Hippocampus.Single.WGS.ON22212.Neuron-#16|7,Hippocampus.Single.WGS.ON22212.Neuron-#17|2,Hippocampus.Single.WGS.ON22212.Neuron-#19|3,Hippocampus.Single.WGS.ON22212.Neuron-#37|1,Hippocampus.Single.WGS.ON22212.Neuron-#7|5,Liver.Bulk.WGS.ON22212|22,Hippocampus.Single.RC-seq.ON22212.Neuron-#16|18,Hippocampus.Single.RC-seq.ON22212.Neuron-#17|2,Hippocampus.Single.RC-seq.ON22212.Neuron-#7|3	Hippocampus.Single.WGS.ON22212.Neuron-#19|4,Liver.Bulk.WGS.ON22212|20	ACTCCCCAGTGAGATGAACCCAGTACCTCAGTTGAAAATGCAGAAATCACCGGTCTTCTGTGTCGCTGGCGCTGGGAGTTGGAGACTGGAGCTGCTCCTATTCGGCCATCTTGCTCCGCCCCCTCTGCCTTTTAGTTTTTACTACTTTCTTTGGAGGCAGAAATTGGGCATAAGATGATATGAGGGCTGGTCTCCTCCCTTAGTAGTGGGCTTGCTGTGTCAAATGGTAGTTCTACTTTTAGTTCTTTGAGAAATCTTTATACTGTTT	TTTTTGTATTTTTAGTAGAGATGGGGTTTCACTGTGTTAGCCAGGATGGTCTCCATCTCCTGACCTCGTGATCCACCCGCCTCAGCCTCTCAAAGTGCTGGGATTACAAGCGTGAACCACCACCCCCCTCCTCTGCCTTTTAGTTTTTTTGACTTTTTGTTTTTTTTTTTTTTTTTTTTAATATTATTTATTATTATTATACTTTAAGTTGTAGGGTACTTGTGCATAACGTGCAGGGTTGTTACCTATGTATACTTGTGCCATGTT	AAAACTAAAAGGCAGAGGGGGCGGAGCAAGATGGCCGAATAGGAGCAGCTCCAGTCTCCAACTCCCAGCGCCAGCGACACAGAAGACCGGTGATTTCTGCATTTTCAACTGAGGTACTGGGTTCATCTCACTGGGGAGTGCCGGACGATCGGAGCTGGTCAGCTGCTGCAGCCCGACCAGCGAGAGCTGAAGCAGGGCGAGGCATTGCCTCACCTGGGAAGCGCAAGGGGGAAGGGAGTCCCTTTTCCTAGCCAGGGGAACTGAGACACACAACACCTGGAAAATCGGGTAACTCCCACCCCAATACTGCGCTTTAGGAAACAGGCACACCAGGAGATCATATCCCACACCTGGCCGGGAGGGTCCCACACCCACGGAGCCTCCCTCGTTGCTAGCGCA…	AGGGAAAAGAAAAAAAAAAAAAAAAAAAAAAAAAAAAAAAAAAAAAAAAAAAAAAAAAAAAAAAAAAAAAAAAAAAAAAAAAAAAAAAAAAAAAAAAAAAAAAAAAAAAAAAAAAAAAAAAAAAAAAAAAAAAAAAAAAAAAAAAAAAAAA
e7385372-7a44-415e-bccb-328d8ad4d811	Chr1	137630269	137630256	ALU	Alu_YRa4	0	269	+	+	N	GAAAATTTATATTT	Hippocampus.Single.WGS.ON22213.Neuron-#71|1,Hippocampus.Single.WGS.ON22213.Neuron-#31|68,Hippocampus.Single.WGS.ON22213.Neuron-#38|1,Hippocampus.Single.WGS.ON22213.Neuron-#39|8,Hippocampus.Single.WGS.ON22213.Neuron-#47|2,Liver.Bulk.WGS.ON22213|9,Hippocampus.Single.RC-seq.ON22213.Neuron-#31|14,Hippocampus.Single.RC-seq.ON22213.Neuron-#38|1,Hippocampus.Single.RC-seq.ON22213.Neuron-#39|1,Hippocampus…	Hippocampus.Single.WGS.ON22213.Neuron-#31|43,Hippocampus.Single.WGS.ON22213.Neuron-#38|1,Hippocampus.Single.WGS.ON22213.Neuron-#39|7,Hippocampus.Single.WGS.ON22213.Neuron-#47|3,Liver.Bulk.WGS.ON22213|12,Hippocampus.Single.RC-seq.ON22213.Neuron-#31|17,Hippocampus.Single.RC-seq.ON22213.Neuron-#38|3,Hippocampus.Single.RC-seq.ON22213.Neuron-#39|2	TAAAAAAAAAAGTAGGAAATATTTAATATTTTGTAGAGCTTCCTAGGATATCTTACCTATTTAAAGTTTATTGTTAAATTTCCGTATCTACTTCAGTCTTTTTGACTAGGTTTAAGAATAATTGAATTAGGTTGGAAGTTCCTCTATCATTTATTATACTTGGGCCTCCATCTTCTCTTCTGTTAGACCGGAACTGCATGGTCCTGTCTAGCTAACCAGCTTTGACATTTCTTTGATCTATATATCTGCTAACTGTAGTGTTTATACTGTGAAAATTTATATTTGGCCGGGCGCGGTGGCTCAAGCCTGTAATCCCAGCACTTTGGGAGGCCGAGACGGGCGGATCACAAGGTCAGGAGATC	ATTGGGGTGAACCCGGGTGGCGGAGGTGGCTTTTCGCTGTGACCCGCCCAATACAACCCAGCCTGGGGGAAATACCTCGACTCCTTAAAAAAAAAAAAAAAAAAAAAAAAAAAAAAAAAAAGAAAATTTATATTTATTTTATAAGTACATTTTTAATTTATACAAATTTTTTAAAGTCCTGTTTTTCCTTTTGTAGCTGTATGCAGGAGCTATTCTTGAAGTTTGTGGGAATATGAA	GCCTCCATCTTCTCTTCTGTTAGACCGGAACTGCATGGTCCTGTCTAGCTAACCAGCTTTGACATTTCTTTGATCTATATATCTGCTAACTGTAGTGTTTATACTGTGAAAATTTATATTTGGCCGGGCGCGGTGGCTCAAGCCTGTAATCCCAGCACTTTGGGAGGCCGTGAGACCGGGCGGATCACAAGGTCAGGAGATCGAGACCATCCTGGCTAACATGGTGAAACCCCGTCTCTACTAAAAATACAAAAAACTAGCCGGGCGAGGTGGCGGGCGCCTGTAGTCCCAGCTACTCCGGAGGCTGAGGCAGGAGAATGGCGTAAACCCGGGAGGCGGAGCTTGCAGTGAGCTGAGACCCGGCCACTTCACTCCAGCCTGGGCGACAGAGCGAGACTC…	GCCTCCATCTTCTCTTCTGTTAGACCGGAACTGCATGGTCCTGTCTAGCTAACCAGCTTTGACATTTCTTTGATCTATATATCTGCTAACTGTAGTGTTTATACTGTGAAAATTTATATTTGGCCGGGCGCGGTGGCTCAAGCCTGTAATCCCAGCACTTTGGGAGGCCGTGAGACCGGGCGGATCACAAGGTCAGGAGATCGAGACCATCCTGGCTAACATGGTGAAACCCCGTCTCTACTAAAAATACAAAAAACTAGCCGGGCGAGGTGGCGGGCGCCTGTAGTCCCAGCTACTCCGGAGGCTGAGGCAGGAGAATGGCGTAAACCCGGGAGGCGGAGCTTGCAGTGAGCTGAGACCCGGCCACTTCACTCCAGCCTGGGCGACAGAGCGAGACTC…
a3269a6d-d1d8-4a70-98a6-df796a341509	Chr1	138505237	138505249	ALU	Alu_YRb4	0	257	-	-	N	TAAAGATTGAATT	Hippocampus.Single.WGS.ON22212.Neuron-#10|4,Hippocampus.Single.WGS.ON22212.Neuron-#17|13,Liver.Bulk.WGS.ON22212|36,Hippocampus.Single.RC-seq.ON22212.Neuron-#17|2	Hippocampus.Single.WGS.ON22212.Neuron-#10|2,Hippocampus.Single.WGS.ON22212.Neuron-#17|6,Liver.Bulk.WGS.ON22212|32,Hippocampus.Single.RC-seq.ON22212.Neuron-#17|3	TATTTAATCCTATAAAACAACCATATAGAAAAAAAATGTTTTAAGTCATAAGAAATAATTATCTATTTTGTGACAATTAATTTAGCACACTCTGTAAATAAATTCACTTTCCTGGTGTTAATTTAATGTTCCACTTTATATATGCTACGTAAGTTCATTTGTTAGAGAATATTTTGGCTGGCTTTCTTCACTGTAAAAAATAAAATTACTTCTAACAAATCTGATTCAAATACAACATGAAGCCTGTTCTTCCACAATAATATTAATTCGAACAATTCAATCTTTAGCGGCCGGGCGCGGTGGCTCACGCCTGTAATCCCAGCACTTTGGGAGGCCGAGGCGGGCGGATCACAAGGTCAGGAGATCGAGACCACGGTGAAACCCCGTCTCTACTAAAAA…	ATTTTTCATTATTAAAAAACTTATTAAATTATATAATAATTTAATAGCTTGAAGATAATTTTTCTTTAGGTTTGAAAAGTTGAGGTAAACTAAGACATATTGAGTTGGAAAGTATAATTGTGTTCCTCAAATAAAGATTGAATTTTTTTTTTTTATTTTGTTTTTTTTTAAGGGTGTCTAGCGCTCAGTCGGGCCCAGGGTGGTG	GTTTAAAAGCACTGTGGCTAAGAAAATTCAGGCCGGGCGCGGTGGCTCACGCCTGTAATCCCAGCACTTTGGGAGGCCGAGGCGGGCGGATCACAAGGTCAGGATATCGAGACCACGGTGAAACCCCGTCTCTACTAAAAATACAAAAAATTAGCCGGGCGCGGTTGTGGGCGCCTGTAGTTTCCCAGCTACTCGGGAGGCTGAGGCAGGAGAATGGCGTGAACCCGGGAGGCGGAGCTTGCAGTGAGCCGAGATCGCGCCACTGCACTCCAGCCTGGGCGACAGAGCGAGACTCCGTCTCAAAAAAAAAAAAAAAAAAAAAAAAAATTCAATCTTTATTTGAGGAACACAATTATAATTTACCAACTCAATATGTCTTAGTTTACCTCAACTTTTCAA…	GTTTAAAAGCACTGTGGCTAAGAAAATTCAGGCCGGGCGCGGTGGCTCACGCCTGTAATCCCAGCACTTTGGGAGGCCGAGGCGGGCGGATCACAAGGTCAGGATATCGAGACCACGGTGAAACCCCGTCTCTACTAAAAATACAAAAAATTAGCCGGGCGCGGTTGTGGGCGCCTGTAGTTTCCCAGCTACTCGGGAGGCTGAGGCAGGAGAATGGCGTGAACCCGGGAGGCGGAGCTTGCAGTGAGCCGAGATCGCGCCACTGCACTCCAGCCTGGGCGACAGAGCGAGACTCCGTCTCAAAAAAAAAAAAAAAAAAAAAAAAAATTCAATCTTTATTTGAGGAACACAATTATAATTTACCAACTCAATATGTCTTAGTTTACCTCAACTTTTCAA…
6e882be4-c7be-4dde-8d99-99443b6b3ea8	Chr1	139003920	139003933	ALU	Alu_YRa4	0	269	-	-	N	TGGAATGTATTCTT	Hippocampus.Single.WGS.ON22212.Neuron-#17|56,Hippocampus.Single.WGS.ON22212.Neuron-#21|1,Hippocampus.Single.WGS.ON22212.Neuron-#37|7,Liver.Bulk.WGS.ON22212|12,Hippocampus.Single.RC-seq.ON22212.Neuron-#17|12,Hippocampus.Single.RC-seq.ON22212.Neuron-#21|2	Hippocampus.Single.WGS.ON22212.Neuron-#17|29,Hippocampus.Single.WGS.ON22212.Neuron-#21|2,Hippocampus.Single.WGS.ON22212.Neuron-#37|9,Hippocampus.Single.WGS.ON22212.Neuron-#7|1,Liver.Bulk.WGS.ON22212|14,Hippocampus.Single.RC-seq.ON22212.Neuron-#17|7,Hippocampus.Single.RC-seq.ON22212.Neuron-#21|2	TAGTAGAGACGGGGTTTCACGGTGTTAGCCAGGATGGTCTCGATCTCCTGACCTCGTGATCCGCCCGTCTCGGCCTCCCAAAGTGCTGGGATTACAGGCTTGAGCCACCGCGCCCGGCCCTGGAATGTATTCTTATATATTGTGTGAGGATGGTGGGATC	TTGCCTTTTTACTCTGTGGTACTTTTTGATGATGACCCAGAGCTCTTAATTTTAATGTGGTCAGATCCTTTCCTCATACTGTCTTCCGAAAGCTTTAGCATTTTGCCTTTCATGTTTAAGACCTTACTTCCATTTGGAATGTATTCTTTTTTTTTTTTTTTTTTTTTTTTTTTATTGATATGGACGGGTCTTGCTCTGTCGCCCGGGCTGGGGTTGGCAGTGGCCGGATCTACCGCTCACTGCAGGAGCACCGCCA	ATAGGGTGTGGGTAACAAGCAGAAGAAGGAAATTGGATCCCATCCTCACACAATATATAAGAATACATTCCAGGGCCGGGCGCGGTGGCTCAAGCCTGTAATCCCAGCACTTTGGGAGGCCGAGACGGGCGGATCACGAGGTCAGGAGATCGAGACCATCCTGGCTAACACCGTGAAACCCCGTCTCTACTAAAAATACAAAAAGCTAGCCGGGCGAGGTGGCGGGCGCCTGTAGTCCCAGCTACTCCGGGGGCTGAGGCAGGAGAATGGCCTAAACCCGGGAGGCGGAGCTTGCAGTGAGCGGAGATCCGGCCACTGCACTCCAGCCCGGGCGACAGAGCAAGACTCCGTCTCAATAAAAAAAAAAAAAAAAAAAAAAAAAAAAAAAATACAATCCAA…	ATAGGGTGTGGGTAACAAGCAGAAGAAGGAAATTGGATCCCATCCTCACACAATATATAAGAATACATTCCAGGGCCGGGCGCGGTGGCTCAAGCCTGTAATCCCAGCACTTTGGGAGGCCGAGACGGGCGGATCACGAGGTCAGGAGATCGAGACCATCCTGGCTAACACCGTGAAACCCCGTCTCTACTAAAAATACAAAAAGCTAGCCGGGCGAGGTGGCGGGCGCCTGTAGTCCCAGCTACTCCGGGGGCTGAGGCAGGAGAATGGCCTAAACCCGGGAGGCGGAGCTTGCAGTGAGCGGAGATCCGGCCACTGCACTCCAGCCCGGGCGACAGAGCAAGACTCCGTCTCAATAAAAAAAAAAAAAAAAAAAAAAAAAAAAAAAATACAATCCAA…
3a0b846e-47b2-46d4-bde4-98860c5483ae	Chr1	139138263	139138249	ALU	Alu_YRa4	0	269	+	+	N	AAAATGTTTCCTTTA	Hippocampus.Single.WGS.ON22212.Neuron-#16|5,Hippocampus.Single.WGS.ON22212.Neuron-#17|27,Hippocampus.Single.WGS.ON22212.Neuron-#21|12,Hippocampus.Single.WGS.ON22212.Neuron-#7|25,Liver.Bulk.WGS.ON22212|15,Hippocampus.Single.RC-seq.ON22212.Neuron-#16|1,Hippocampus.Single.RC-seq.ON22212.Neuron-#17|6,Hippocampus.Single.RC-seq.ON22212.Neuron-#21|3,Hippocampus.Single.RC-seq.ON22212.Neuron-#7|9	Hippocampus.Single.WGS.ON22212.Neuron-#17|31,Hippocampus.Single.WGS.ON22212.Neuron-#21|15,Hippocampus.Single.WGS.ON22212.Neuron-#7|32,Liver.Bulk.WGS.ON22212|11,Hippocampus.Single.RC-seq.ON22212.Neuron-#17|10,Hippocampus.Single.RC-seq.ON22212.Neuron-#21|4,Hippocampus.Single.RC-seq.ON22212.Neuron-#7|15,Hippocampus.Single.RC-seq.ON22213.Neuron-#15|1,Hippocampus.Single.RC-seq.ON22213.Neuron-#38|1	AATCAAAGATGTCTGCCACTAACATTTGATAATCAAAAGCCATAACAAGCAAATGTGGCAATATATCAATATCTGTTCAATCTTGGCAGTGAGCGTAGGGTGTTTGTAATATTCTTTATAGTTTGGTGGGCTTAAAATGTTTCCTTTAGGCCGGGCGCGGTGGCTCACAGCCTGTAATCCCAGCACTTTGGGAGGCCGAGACGGGCGGATCACGAAGTCAGGAGATCGAGACCATCCTGGCTAACACGGTGAAACCCCGTCTCTACTAA	GGTTTGCCAGGTCCATGGCGTTAACCCGGGTGGCTGCCTTTTCAGTTTCCCAATACACGGCCAATTCACCACCCCCTGGGGCAAACTCAAAAAAACCCTCAAAAAAAAAAAAAAAAAAAAAAATGTTTCCTTTAAAAAAGAACAACAGTGCAGTAGCAACCTCAAAATGAGTGCATTAAACTGGCATGCGCA	CATAACAAGCAAATGTGGCAATATATCAATATCTGTTCAATCTTGGCAGTGAGCGTAGGGTGTTTGTAATATTCTTTATAGTTTGGTGGGCTTAAAATGTTTCCTTTAGGCCGGGCGCGGTGGCTCAAGCCTGTAATCCCAGCACTTTGGGAGGCCGAGACGGGCGGATCACGAAGTCAGGAGATCGAGACCATCCTGGCTAACACGGTGAAACCCCGTCTCTACTAAAAATACAAGAAAATTAGCCGGGCGAGGTGGCGGGCGCCTGTAGTCCCAGCTACTCGGGAGGCTGAGGCAGGAGAATGGCGTGAACCCGGGAGGCGGAGCTTGCAGTGAGCCAAGATCGCGCCACTGCACTCCAGCCTGGGGCACAGAGCAAGACTCCGTCTCAAAAAAAAA…	CATAACAAGCAAATGTGGCAATATATCAATATCTGTTCAATCTTGGCAGTGAGCGTAGGGTGTTTGTAATATTCTTTATAGTTTGGTGGGCTTAAAATGTTTCCTTTAGGCCGGGCGCGGTGGCTCAAGCCTGTAATCCCAGCACTTTGGGAGGCCGAGACGGGCGGATCACGAAGTCAGGAGATCGAGACCATCCTGGCTAACACGGTGAAACCCCGTCTCTACTAAAAATACAAGAAAATTAGCCGGGCGAGGTGGCGGGCGCCTGTAGTCCCAGCTACTCGGGAGGCTGAGGCAGGAGAATGGCGTGAACCCGGGAGGCGGAGCTTGCAGTGAGCCAAGATCGCGCCACTGCACTCCAGCCTGGGGCACAGAGCAAGACTCCGTCTCAAAAAAAAA…
1e60a549-4fcc-4d9a-b223-80244fd26384	Chr1	141293257	141293272	ALU	Alu_YRa4	0	270	-	-	N	TAGCACTGCATATTTT	Hippocampus.Single.WGS.ON22212.Neuron-#17|4,Liver.Bulk.WGS.ON22212|13,Hippocampus.Single.RC-seq.ON22212.Neuron-#17|1	Hippocampus.Single.WGS.ON22212.Neuron-#17|4,Hippocampus.Single.WGS.ON22212.Neuron-#19|1,Liver.Bulk.WGS.ON22212|11	TTTTTTTTTTTTTTTTTTTTTTTTTGAGACGGAGTCTCGCTCTGTCGCCCAGGCTGGAGTGCAATGGCGCGATCTCGGCTCACTGCAAGCTCCGCCTCCCAGGTTCACGCCATTCTCCTGCCTCAGCCTCCCGAGTAGCTGGGACTACAGGCGCCCGCCACCACACCCGGCTAGTTTTTTGCATTTTTAGTAGAGACGGGGTTTCACCGTGTTAGCCAGGATGGTCTCGATCTCCTGACCTCGTGATCCGCCCGCCTCGGCCTCCCAAAGTGCTGGGATTACAGGCGTGAGCCACCGCGCCCGGCTAGCACTGCATATTTTAAGACATTCAACACCTTGCATGAATGTTCCTGTGCCAGAGCAGATTAATCAAAATAATAGCCTTCAGTGGTGCCTGTA…	CTGAATACTACATCACATAGGCATGTGTAAATGCCAACACACCTGCCTGAACATTGAGGAAAACACAAAGGCTCCATCATTCATTCTTACACTGGGCCCAATTTTTACCCTGAGGTGCTGTAGGCACTCATGTAGCACTGCATATTTTTTTTTTTTTTTTTTTTTTTTTTTGGAGACGGAGTCACGCTATGTCGCCCAGGCTGGAGTGCAATGGCGCGATCTCGGCTCACTGCAAGCCCCGCCTCCCAGGTTCACGCCATTTTCCT	GTTGAATGTCTTAAAATATGCAGTGCTAGCCGGGCGCGGTGGCTCACGCCTGTAATCCCAGCACTTTGGGAGGCCGAGGCGGGCGGATCACGAGGTCAGGAGATCGAGACCATCCTGGCTAACACGGTGAAACCCCGTCTCTACTAAAAATGCAAAAAACTAGCCGGGTGTGGTGGCGGGCGCCTGTAGTCCCAGCTACTCGGGAGGCTGAGGCAGGAGAATGGCGTGAACCTGGGAGGCGGAGCTTGCAGTGAGCCGAGATCGCGCCATTGCACTCCAGCCTGGGCGACAGAGCGAGACTCCGTCTCAAAAAAAAAAAAAAAAAAAAAATATGCAGTGCAACATGAGTGCCCACAGCACCTCAGGGTAAAAATTGGGCCCAGTGTAAGAATT	GTTGAATGTCTTAAAATATGCAGTGCTAGCCGGGCGCGGTGGCTCACGCCTGTAATCCCAGCACTTTGGGAGGCCGAGGCGGGCGGATCACGAGGTCAGGAGATCGAGACCATCCTGGCTAACACGGTGAAACCCCGTCTCTACTAAAAATGCAAAAAACTAGCCGGGTGTGGTGGCGGGCGCCTGTAGTCCCAGCTACTCGGGAGGCTGAGGCAGGAGAATGGCGTGAACCTGGGAGGCGGAGCTTGCAGTGAGCCGAGATCGCGCCATTGCACTCCAGCCTGGGCGACAGAGCGAGACTCCGTCTCAAAAAAAAAAAAAAAAAAAAAATATGCAGTGCAACATGAGTGCCCACAGCACCTCAGGGTAAAAATTGGGCCCAGTGTAAGAATT
300f69b4-469c-48fc-921f-dafbc1c69376	Chr1	141547274	141547286	ALU	Alu_YRc2	0	270	+	+	N	AAAGAAAATCTGG	Hippocampus.Single.WGS.ON22212.Neuron-#17|1,Hippocampus.Single.WGS.ON22212.Neuron-#19|1,Hippocampus.Single.WGS.ON22212.Neuron-#21|16,Hippocampus.Single.WGS.ON22213.Neuron-#15|3,Hippocampus.Single.WGS.ON22213.Neuron-#49|3,Liver.Bulk.WGS.ON22212|11,Liver.Bulk.WGS.ON22213|7,Hippocampus.Single.RC-seq.ON22212.Neuron-#21|5,Hippocampus.Single.RC-seq.ON22213.Neuron-#15|2	Hippocampus.Single.WGS.ON22212.Neuron-#17|1,Hippocampus.Single.WGS.ON22212.Neuron-#19|6,Hippocampus.Single.WGS.ON22212.Neuron-#21|31,Hippocampus.Single.WGS.ON22213.Neuron-#15|6,Hippocampus.Single.WGS.ON22213.Neuron-#25|2,Hippocampus.Single.WGS.ON22213.Neuron-#49|5,Liver.Bulk.WGS.ON22212|21,Liver.Bulk.WGS.ON22213|15,Hippocampus.Single.RC-seq.ON22212.Neuron-#21|8,Hippocampus.Single.RC-seq.ON22213.N…	TAATGAGTCCAAAGAGCTTTGGTTATGTGAGTTGTATCTGTCAATATTTACTATATTGGAGCTGAAAATTGAGAATTTAAAAAAAATATTTATATAAATTGCAATAAAAAACCGTAACATGAGAATATAAGCAACATATTTTTATTAAATTTTTTTCCAGAATGAAAACAATTTTTTGAAAAGGAGCAATTTCTACGTTTGCATTTAATCTCTTGCAATATATTGTTTTGAACTACATAAAGAAAATCTGGGCCGGGCGCGGTGGCTCAAGCCTGTAATCCCAGCACTTTGGGAGGCCAAGACGGGCGGATCACTAGGTCAGGAGATCGAGACCATCCTGGCGAACACGGTGAAACCCCGTCTCTACTAAAAAATACAAAAAAAAAACTAGCCGGGCGA…	TAATGAGTCCAAAGAGCTTTGGTTATGTGAGTTGTATCTGTCAATATTTACTATATTGGAGCTGAAAATTGAGAATTTAAAAAAAATATTTATATAAATTGCAATAAAAAACCGTAACATGAGAATATAAGCAACATATTTTTATTAAATTTTTTTCCAGAATGAAAACAATTTTTTGAAAAGGAGCAATTTCTACGTTTGCATTTAATCTCTTGCAATATATTGTTTTGAACTACATAAAGAAAATCTGGGCCGGGCGCGGTGGCTCAAGCCTGTAATCCCAGCACTTTGGGAGGCCAAGACGGGCGGATCACTAGGTCAGGAGATCGAGACCATCCTGGCGAACACGGTGAAACCCCGTCTCTACTAAAAAATACAAAAAAAAAACTAGCCGGGCGA…	TTTTTTCCAGAATGAAAACAATTTTTTGAAAAGGAGCAATTTCTACGTTTGCATTTAATCTCTTGCAATATATTGTTTTGAACTACATAAAGAAAATCTGGGCCGGGCGCGGTGGCTCAAGCCTGTAATCCCAGCACTTTGGGAGGCCAAGACGGGCGGATCACTAGGTCAGGAGATCGAGACCATCCTGGCGAACACGGTGAAACCCCGTCTCTACTAAAAAATACAAAAAAAAAACTAGCCGGGCGAGGCGGCGGGCGCCTGTAGTCCCAGCTACTCCGGAGGCTGAGGCAGGAGAATGGCGTAAACCCGGGGGGCGGAGCTTGCAGTGAGCTGAGATCCGGCCACTGCACTCCAGCCCGGGCGACAGAGCCAGACTCTGTCTCAAAAAAAAAAAAA…	TTTTTTCCAGAATGAAAACAATTTTTTGAAAAGGAGCAATTTCTACGTTTGCATTTAATCTCTTGCAATATATTGTTTTGAACTACATAAAGAAAATCTGGGCCGGGCGCGGTGGCTCAAGCCTGTAATCCCAGCACTTTGGGAGGCCAAGACGGGCGGATCACTAGGTCAGGAGATCGAGACCATCCTGGCGAACACGGTGAAACCCCGTCTCTACTAAAAAATACAAAAAAAAAACTAGCCGGGCGAGGCGGCGGGCGCCTGTAGTCCCAGCTACTCCGGAGGCTGAGGCAGGAGAATGGCGTAAACCCGGGGGGCGGAGCTTGCAGTGAGCTGAGATCCGGCCACTGCACTCCAGCCCGGGCGACAGAGCCAGACTCTGTCTCAAAAAAAAAAAAA…
ce742197-3861-4ffc-a5fc-9d0894647151	Chr1	142670806	142670818	ALU	Alu_YRa4	0	269	-	-	N	TGTATTTTGTTTT	Hippocampus.Single.WGS.ON22212.Neuron-#10|46,Hippocampus.Single.WGS.ON22212.Neuron-#19|26,Hippocampus.Single.WGS.ON22212.Neuron-#21|11,Hippocampus.Single.WGS.ON22212.Neuron-#7|1,Liver.Bulk.WGS.ON22212|19,Hippocampus.Single.RC-seq.ON22212.Neuron-#10|3,Hippocampus.Single.RC-seq.ON22212.Neuron-#19|8,Hippocampus.Single.RC-seq.ON22212.Neuron-#21|6	Hippocampus.Single.WGS.ON22212.Neuron-#10|25,Hippocampus.Single.WGS.ON22212.Neuron-#19|22,Hippocampus.Single.WGS.ON22212.Neuron-#21|3,Hippocampus.Single.WGS.ON22212.Neuron-#7|1,Liver.Bulk.WGS.ON22212|15,Hippocampus.Single.RC-seq.ON22212.Neuron-#10|7,Hippocampus.Single.RC-seq.ON22212.Neuron-#19|5,Hippocampus.Single.RC-seq.ON22212.Neuron-#21|2	TTAGTAGAGACGGGGTTTCACCATATTAACCAGGATGGTCTCGATCTCCTGACCTCGTGATCCGCCCGTCTCGGCCTCCCAAAGTGCTGGGATTACAGGCTTGAGCCACCGCGCCCGGCCTGTATTTTGTTTTAAAGAAAACTATTGTATTTTCTCAAACATATCATTATACTTTTGGGCAAATAAATCTTTGATAGTATATTCAACCCTAGACCATCAACACATT	GATCAAAACCAAATAGAATATTTGTTTATTCCACTTTATGAGTTTACAGTCTAATCTAAATTTTTAATATTTAAATTCCAAATCGACAAACTGGATATTCTAATATCATAATTTCTGAAATTATGTACTTTTGTATTTTGTTTTTTTTGTTTTTTTTTTGTGACGGAGTTTCGAGCTCTCTGGT	AATAGTTTTCTTTAAAACAAAATACAGGCCGGGCGCGGTGGCTCAAGCCTGTAATCCCAGCACTTTGGGAGGCCGAGACGGGCGGATCACGAGGTCAGGAGATCGAGACCATCCTGGTTAATATGGTGAAACCCCGTCTCTACTAAAAAGTACAAAAAACTAGCCGGGCAAGGTGGCGGGCGCCTGTAGTCCCAGCTACTTGGGAGGCTGAGGCAGGAGAATGGCGTGAACCCGGGAGGCGGAGCTTGCAGTGAGCTGAGATCTGGCCACTGCACTCCAGCCTGGGCGACAGAGCGAAACTCCGTCTCAAAAAAAAAACAAAAAAAACAAAATACAAAAGTACATAATTTCAGAAATTATGATATTAGAATATCCACGGTG	AATAGTTTTCTTTAAAACAAAATACAGGCCGGGCGCGGTGGCTCAAGCCTGTAATCCCAGCACTTTGGGAGGCCGAGACGGGCGGATCACGAGGTCAGGAGATCGAGACCATCCTGGTTAATATGGTGAAACCCCGTCTCTACTAAAAAGTACAAAAAACTAGCCGGGCAAGGTGGCGGGCGCCTGTAGTCCCAGCTACTTGGGAGGCTGAGGCAGGAGAATGGCGTGAACCCGGGAGGCGGAGCTTGCAGTGAGCTGAGATCTGGCCACTGCACTCCAGCCTGGGCGACAGAGCGAAACTCCGTCTCAAAAAAAAAACAAAAAAAACAAAATACAAAAGTACATAATTTCAGAAATTATGATATTAGAATATCCACGGTG
ae321ee9-49ec-4103-81f8-23d52a882c2f	Chr1	142777134	142777125	ALU	Alu_YRa4	0	269	+	+	N	GAATTTTAGG	Liver.Bulk.WGS.ON22213|16	Hippocampus.Single.WGS.ON22213.Neuron-#14|2,Liver.Bulk.WGS.ON22213|5	TGAGTGTATAATAATAACATATGACATGGAACATCTTTCATATGATTATTTGCCATCTGTATATCTTCTTTGGGGAGGTGCCTGTTAAGGTCTTTGGCCCATTTTTAAATCGGGTTTGTGTTCTTATTGTTGAATTTTAGGGGCCGGGCGCGGTGGCTCAAGCCTGTAATCCCAGCACTTTGGGAGGCCGAGACGGGCGGATCACGAGGTCAGGAGATCGAGACCATCTTGGCTAACACGGTGAAACCCCGTCTCTACTAA	TTATTGGGGTGAACCCGGGTGGGGTTGCTTGCTGTGCGCTGTGATCCGGCCACTGCAATCCAGCCGGGGCGGCTCTGCGATACACCGTCCAAAAAAAAAAAAAAAAAAAAAAAAAAGAATTTTAGGAGTTCTTGGTATATTTTAGGTAACAGTTCTTTAACTGAAACAACTTTTACAAATATTCTCTCCCAGTCTGTGACTTATCTTTTATTTATATAGTCAGTTTCTTTTGCAAAACAGAAATTTTAAATCTT	TATGATTATTTGCCATCTGTATATCTTCTTTGGGGAGGTGCCTGTTAAGGTCTTTGGCCCATTTTTAAATCGGGTTTGTGTTCTTATTGTTGAATTTTAGGGGCCGGGCGCGGTGGCTCAAGCCTGTAATCCCAGCACTTTGGGAGGCCGAGACGGGCGGATCACGAGGTCAGGAGATCGAGACCATCTTGGCTAACACGGTGAAACCCCGTCTCTACTAAAAAATACAAAAAAACCTAGCCGGGCGAGGTGGCGGGCGCCTGTAGTCCCAACTACTCGGGAGGCTGAGGCAGGAGAATGGCGTG	TCTTAGCATGTGGGAGGCCGAGACGGGCGGATCACGAGGTCAGGAGATCGAGACCATCTTGGCTAACACGGTGAAACCCCGTCTCTACTAAAAAATACAAAAAACTAGCCGGGCGAGGTGGCGGGCGCCTGTAGTCCCAACTACTCGGGAGGCTGAGGCAGGAGAATGGCGTGAACCCGGGAGGCGGAGCTTGCAGTGAGCTGAGATCCGGCCACTGCACTCCAGCCTGGGCGGCAGAGCGAGACTCCGTCTCAAAAAAAAAAAAAAAAAAAAAAAAAGAATTTTAGGAGTTCTTGGTATATTTTAGGTAACAGTTATTTATCTTATAAATCTTTTAAAAATATTCTCTCCCAGTCTGT
341a06f2-12b4-44c4-b1e3-c4a72ca8765f	Chr1	142961253	142961239	ALU	Alu_YRa4	0	270	+	+	N	AAAAATGACTTCTTC	Hippocampus.Single.WGS.ON22212.Neuron-#16|1,Hippocampus.Single.WGS.ON22212.Neuron-#7|4,Hippocampus.Single.WGS.ON22213.Neuron-#39|1,Liver.Bulk.WGS.ON22212|11,Hippocampus.Single.RC-seq.ON22212.Neuron-#7|3	Hippocampus.Single.WGS.ON22212.Neuron-#7|2,Liver.Bulk.WGS.ON22212|5,Hippocampus.Single.RC-seq.ON22212.Neuron-#16|1,Hippocampus.Single.RC-seq.ON22212.Neuron-#7|2	CAAAAATTCACCACATCCTTTACAATATCTCACTATGACCTCATCCTTGATTCATCCTTTCCTATTTCCAGTCTTTCTAAAATCATCACTCTAACTCCAATGTCTTTCACATTTCAAATTCCTCTGAGTGTTTGATGCTGTATCTACGATAATGCTGAACAGCATATATGTTTAGTTCTTTGTTTCAAATCCTGCTAAGAAACAGAACATATACAAATTTTCTTGTATTACTTCCCCTTTTCCACCTTTCAAAAATGACTTCTTCGGCCGGGCGCGGTGGCTCAAGCCTGTAATCCCAGCACTTTGGGAGGCCGAGACGGGCGGATCACGAGGTCAGGAGTTCGAGACCATCCTGGCTAACACGGTGAAACCCCATCTCTACTAAAAAAATACAAAAAA…	AGAATGGCGTAAAAACCCGGGAGGCAGAGCTTGCAGTGAGCTGAGATCCGGCCACTGCACTCCAGCCTGGGCGACACAGCGAGACTCCGTCTCAAAAAAAAAAAAAAAAAAAATTACTTCTTCAACTCCTAGAGAAAGAAAATAAAAAACAAACAGAACACAGGGCTTCTTTCTTTATGGTCTTCTAATACGATAGCATACTTCTGTGTTGAAAACACTAGGTGTTTTTCAGTGAAACACAGACAACAAG	ATGCTGAACAGCATATATGTTTAGTTCTTTGTTTCAAATCCTGCTAAGAAACAGAACATATACAAATTTTCTTGTATTACTTCCCCTTTTCCACCTTTCAAAAATGACTTCTTCGGCCGGGCGCGGTGGCTCAAGCCTGTAATCCCAGCACTTTGGGAGGCCGAGACGGGCGGATCACGAGATCAGGAGTTCGAGACCATCCTGGCTAACACGGTGAAACCCCATCTCTACTAAAAAAATACAAAAAACTAGCCGGGCGAGGTGGCGGGTGCCTGTAATCCTGGCTACTCGGGAGGCTGAGGCAGGAGAATGGCGTAAAAACCCGGGAGGCAGAGCTTGCAGTGAGCTGAGATCCGGCCACTGCACTCCAGCCTGGGCGACACAGCGAGACTCCGTCTC…	ATGCTGAACAGCATATATGTTTAGTTCTTTGTTTCAAATCCTGCTAAGAAACAGAACATATACAAATTTTCTTGTATTACTTCCCCTTTTCCACCTTTCAAAAATGACTTCTTCGGCCGGGCGCGGTGGCTCAAGCCTGTAATCCCAGCACTTTGGGAGGCCGAGACGGGCGGATCACGAGATCAGGAGTTCGAGACCATCCTGGCTAACACGGTGAAACCCCATCTCTACTAAAAAAATACAAAAAACTAGCCGGGCGAGGTGGCGGGTGCCTGTAATCCTGGCTACTCGGGAGGCTGAGGCAGGAGAATGGCGTAAAAACCCGGGAGGCAGAGCTTGCAGTGAGCTGAGATCCGGCCACTGCACTCCAGCCTGGGCGACACAGCGAGACTCCGTCTC…
d6dfc331-80d6-477c-8590-3115ab6ab955	Chr1	144418900	144418913	ALU	Alu_YRa4	0	270	+	+	N	AAAAAGCATGAATA	Hippocampus.Single.WGS.ON22212.Neuron-#16|3,Hippocampus.Single.WGS.ON22212.Neuron-#19|1,Hippocampus.Single.WGS.ON22212.Neuron-#37|1,Hippocampus.Single.WGS.ON22212.Neuron-#7|1,Hippocampus.Single.WGS.ON22213.Neuron-#38|15,Hippocampus.Single.WGS.ON22213.Neuron-#39|8,Liver.Bulk.WGS.ON22212|11,Liver.Bulk.WGS.ON22213|4,Hippocampus.Single.RC-seq.ON22212.Neuron-#16|1,Hippocampus.Single.RC-seq.ON22212.Neu…	Hippocampus.Single.WGS.ON22212.Neuron-#16|3,Hippocampus.Single.WGS.ON22212.Neuron-#19|1,Hippocampus.Single.WGS.ON22212.Neuron-#37|1,Hippocampus.Single.WGS.ON22212.Neuron-#7|11,Hippocampus.Single.WGS.ON22213.Neuron-#25|1,Hippocampus.Single.WGS.ON22213.Neuron-#38|18,Hippocampus.Single.WGS.ON22213.Neuron-#39|8,Liver.Bulk.WGS.ON22212|15,Liver.Bulk.WGS.ON22213|9,Hippocampus.Single.RC-seq.ON22212.Neuro…	TTGGCGTAAACCCGGGTGGGGGCGGTTTCATTTCGCTTCTATCCGCCCCCTCCACTCCCCCCCGGACCACACCCCCAAACACCGTAAAAAAAAAAAAAAAAAAAAAAAAAAAAAAAAAAAAAAAAAGCATGAATATAGGCTATTTATCTATTTTCTTTTTTATTATCACCATTTATGGTATTTAAAATTTACAACTAGAAATTTGCATAACATTAACAAAATAAAAGTAAGTCATGTACATGATTTTTGTGTATTAAATTTAGAGTATAGTAT	TTTTTTTTTTTTTTTTTTTTTTTTTTTTGAGACGGAGTCTGGCTCTGTCGTCCGGGCTGGAGTGCAGTGGCCGGATCTCAGCTCACTGCAAGCTCCGCCTCCCGGGTTTACGCCATTCTCCTGCCTCAGCCTCCCGAGTAGCTGGGACTACAGGCGCCCGCCACCTCGCCCGGCTAGTTTTTTTTTGTATTTTTTAGTAGAGACGGGGTTTCACCGTGTTAGCCAGGATGGTCTCGATCTCCTGACCTCGTGATCCGCCCGTCTCGGCCTCCCAAAGTGCTGGGATTACAGGCTTGAGCCACCGCGCCCGGCCTATTCATGCTTTTTAGGTGGTTTGGATTGTGTGAAAATATTCCTTGATCTATCCCACTTTAAAAAAGTCGTACCAATTGAGTTCAG…	AAGTTATGAGTCATTGTAATATCTGAACTCAATTGGTACGACTTTTTTAAAGTGGGATAGATCAAGGAATATTTTCACACAATCCAAACCACCTAAAAAGCATGAATAGGCCGGGCGCGGTGGCTCAAGCCTGTAATCCCAGCACTTTGGGAGGCCGAGACGGGCGGATCACGAGGTCAGGAGATCGAGACCATCCTGGCTAACACGGTGAAACCCCGTCTCTACTAAAAAATACAAAAAAAAACTAGCCGGGCGAGGTGGCGGGCGCCTGTAGTCCCAGCTACTCGGGAGGCTGAGGCAGGTAGAATGGCGTAAACCCGGGAGGCGGAGCTTGCAGTGAGCTGAGATCCGGCCACTGCACTCCAGCCCGGACGACAGAGCCAGACTCCGTCTCAAAAA…	AAGTTATGAGTCATTGTAATATCTGAACTCAATTGGTACGACTTTTTTAAAGTGGGATAGATCAAGGAATATTTTCACACAATCCAAACCACCTAAAAAGCATGAATAGGCCGGGCGCGGTGGCTCAAGCCTGTAATCCCAGCACTTTGGGAGGCCGAGACGGGCGGATCACGAGGTCAGGAGATCGAGACCATCCTGGCTAACACGGTGAAACCCCGTCTCTACTAAAAAATACAAAAAAAAACTAGCCGGGCGAGGTGGCGGGCGCCTGTAGTCCCAGCTACTCGGGAGGCTGAGGCAGGTAGAATGGCGTAAACCCGGGAGGCGGAGCTTGCAGTGAGCTGAGATCCGGCCACTGCACTCCAGCCCGGACGACAGAGCCAGACTCCGTCTCAAAAA…
72d2780b-5304-443a-ada0-6403dff92cb5	Chr1	144452705	144452718	ALU	Alu_YRa4	0	270	+	+	N	AAAAGAAAATAATC	Hippocampus.Single.WGS.ON22212.Neuron-#16|12,Hippocampus.Single.WGS.ON22212.Neuron-#7|6,Hippocampus.Single.WGS.ON22213.Neuron-#15|7,Hippocampus.Single.WGS.ON22213.Neuron-#69|3,Hippocampus.Single.WGS.ON22213.Neuron-#47|19,Liver.Bulk.WGS.ON22212|9,Liver.Bulk.WGS.ON22213|13,Hippocampus.Single.RC-seq.ON22212.Neuron-#7|1,Hippocampus.Single.RC-seq.ON22213.Neuron-#15|10,Hippocampus.Single.RC-seq.ON22213…	Hippocampus.Single.WGS.ON22212.Neuron-#16|12,Hippocampus.Single.WGS.ON22212.Neuron-#19|1,Hippocampus.Single.WGS.ON22212.Neuron-#7|11,Hippocampus.Single.WGS.ON22213.Neuron-#15|12,Hippocampus.Single.WGS.ON22213.Neuron-#69|1,Hippocampus.Single.WGS.ON22213.Neuron-#47|26,Liver.Bulk.WGS.ON22212|11,Liver.Bulk.WGS.ON22213|5,Hippocampus.Single.RC-seq.ON22213.Neuron-#15|4,Hippocampus.Single.RC-seq.ON22213.…	GGCATGTTATTGGCGTTAACCCGGGTGGGGGGTTCTTGCATTTTGCTTTTTTCCGGCCACTGCAATCCAGCCTGGGTGAAATTGCGTTCATTCTTCTAAAAAAAAAAAAAAAAAAAAAAAAAAAAGAAAATAATCAGAAAGGTAGATGATAGCCATAAATGAAAATTGCTAGTGAGTTACATAATAATTTTATATCACTTTATTTGAGAGTGACCTTTTTGTTTGTTTCAAACAACACAAAT	TAAAGAGTTTTCAACATTCCTTGTGTAGTTGAACTATTTGTCCAGAAATTTTAAGGATGTAGGGAAAGAAATCTATTATTTTCCAATCTGTATGAGAATCATAGTAATATGTACTCTTCAGTATAAAAGGAATTTATATACAAAGCATTCAGAATAGGTCTGCTCCATCCATTCATGGAAAGCACAGTGTTACTGTTTACGCTGGCTTTCATTATCATGTTAAACAAGTCTAGCCTCTTGACTGAATATGTATGATAAAGGATTAGTGTTGTAATAAAAGAAAATAATCGGCCGGGCGCGGTGGCTCAAGCCTGTAATCCCAGCACTTTGGGAGGCCGAAACGGGCGGATCACGAGGTCAGGAGATCGAGACCATCCTGGCTAACATGGTGAAACCCCG…	TCATGGAAAGCACAGTGTTACTGTTTACGCTGGCTTTCATTATCATGTTAAACAAGTCTAGCCTCTTGACTGAATATGTATGATAAAGGATTAGTGTTGTAATAAAAGAAAATAATCGGCCGGGCGCGGTGGCTCAAGCCTGTAATCCCAGCACTTTGGGAGGCCGAAACGGGCGGATCACGAGGTCAGGAGATCGAGACCATCCTGGCTAACATGGTGAAACCCCGTCTCTACTAAAAAAAATACAAAAAACAAGCCAGGCGAGGTGGCAGGCGCCTGTAGTCCCAGCTACTCGGGAGGCTGAGGCAGGAGAATGGCGTGAACCCGGGAGGGCGGAGCTTGCAGTGAGCTGAGATCCGGCCACTGCACTCCAGCCTGGGTGACAGAGCGAGACTTCGT…	TCATGGAAAGCACAGTGTTACTGTTTACGCTGGCTTTCATTATCATGTTAAACAAGTCTAGCCTCTTGACTGAATATGTATGATAAAGGATTAGTGTTGTAATAAAAGAAAATAATCGGCCGGGCGCGGTGGCTCAAGCCTGTAATCCCAGCACTTTGGGAGGCCGAAACGGGCGGATCACGAGGTCAGGAGATCGAGACCATCCTGGCTAACATGGTGAAACCCCGTCTCTACTAAAAAAAATACAAAAAACAAGCCAGGCGAGGTGGCAGGCGCCTGTAGTCCCAGCTACTCGGGAGGCTGAGGCAGGAGAATGGCGTGAACCCGGGAGGGCGGAGCTTGCAGTGAGCTGAGATCCGGCCACTGCACTCCAGCCTGGGTGACAGAGCGAGACTTCGT…
08768f6c-6015-44a4-82ae-79272101867f	Chr1	144707730	144707744	ALU	Alu_YRb4	0	258	+	+	N	TAAAACAGATAGAGC	Hippocampus.Single.WGS.ON22213.Neuron-#31|8,Liver.Bulk.WGS.ON22213|7	Hippocampus.Single.WGS.ON22213.Neuron-#31|8,Hippocampus.Single.WGS.ON22213.Neuron-#38|1,Liver.Bulk.WGS.ON22213|12,Hippocampus.Single.RC-seq.ON22213.Neuron-#31|4,Hippocampus.Single.RC-seq.ON22213.Neuron-#38|1	AAGGTTGCCTGCATACATAAACATTTTCTTGGCTCTAAACTGAACGGAGACTTTAACATGTGGTTTCTTATGTTAAAAGCCTTGAAGAATATAACGGATGGATGATGCCTTCACACAATCTTATGAAAAACATAGACATTGTTCAACTATAAAAGGTTCGGTTTTAACATTAAAAGAAATTCAGTGAAGTCCTTTCTATGCAGTGCTGAGATAATGAAATCCAAATATATTATTCCTAAATACCCAATTTAAAACAGATAGAGCAGGCCGGGCGCGGTGGCTCAAGCCTGTAATCCCAGCACTTTGGGAGGCCGAGGCGGGCGGATCACAAGGTCAGGAGATCGAGACCACAGTGAAACCCCGTCTCTACTAAAAATACAAAAAAATTAGCCGGGCGCG…	AAGGTTGCCTGCATACATAAACATTTTCTTGGCTCTAAACTGAACGGAGACTTTAACATGTGGTTTCTTATGTTAAAAGCCTTGAAGAATATAACGGATGGATGATGCCTTCACACAATCTTATGAAAAACATAGACATTGTTCAACTATAAAAGGTTCGGTTTTAACATTAAAAGAAATTCAGTGAAGTCCTTTCTATGCAGTGCTGAGATAATGAAATCCAAATATATTATTCCTAAATACCCAATTTAAAACAGATAGAGCAGGCCGGGCGCGGTGGCTCAAGCCTGTAATCCCAGCACTTTGGGAGGCCGAGGCGGGCGGATCACAAGGTCAGGAGATCGAGACCACAGTGAAACCCCGTCTCTACTAAAAATACAAAAAAATTAGCCGGGCGCG…	TAAAAGAAATTCAGTGAAGTCCTTTCTATGCAGTGCTGAGATAATGAAATCCAAATATATTATTCCTAAATACCCAATTTAAAACAGATAGAGCAGGCCGGGCGCGGTGGCTCAAGCCTGTAATCCCAGCACTTTGGGAGGCCGAGGCGGGCGGATCACAAGGTCAGGAGATCGAGACCACAGTGAAACCCCGTCTCTACTAAAAATACAAAAAAATTAGCCGGGCGCGGTGGCGGGCGCCTGTAGTCCTAGCTACTCAGGAGGCTTTGGCAGGAGAATGGCGTGAACCCAGGAGGCGGAGCTTGCAGTGAGCCGAGATCGCGCCACTGCACTCCAGCCTGGGCAACAGCGTGAGACTCCGTCTCAAAAAAAAAATAAATAAATAAAAAAAAAAATAAA…	TAAAAGAAATTCAGTGAAGTCCTTTCTATGCAGTGCTGAGATAATGAAATCCAAATATATTATTCCTAAATACCCAATTTAAAACAGATAGAGCAGGCCGGGCGCGGTGGCTCAAGCCTGTAATCCCAGCACTTTGGGAGGCCGAGGCGGGCGGATCACAAGGTCAGGAGATCGAGACCACAGTGAAACCCCGTCTCTACTAAAAATACAAAAAAATTAGCCGGGCGCGGTGGCGGGCGCCTGTAGTCCTAGCTACTCAGGAGGCTTTGGCAGGAGAATGGCGTGAACCCAGGAGGCGGAGCTTGCAGTGAGCCGAGATCGCGCCACTGCACTCCAGCCTGGGCAACAGCGTGAGACTCCGTCTCAAAAAAAAAATAAATAAATAAAAAAAAAAATAAA…
0460ab28-e94b-4d1b-94c5-f98988b2c93c	Chr1	145141456	145141469	ALU	Alu_YRa4	0	270	+	+	N	AAAAGTTAAGAAAG	Hippocampus.Single.WGS.ON22212.Neuron-#16|8,Hippocampus.Single.WGS.ON22212.Neuron-#19|1,Hippocampus.Single.WGS.ON22212.Neuron-#7|7,Hippocampus.Single.WGS.ON22213.Neuron-#10|1,Hippocampus.Single.WGS.ON22213.Neuron-#25|10,Liver.Bulk.WGS.ON22212|8,Liver.Bulk.WGS.ON22213|12,Hippocampus.Single.RC-seq.ON22212.Neuron-#16|5,Hippocampus.Single.RC-seq.ON22212.Neuron-#19|2,Hippocampus.Single.RC-seq.ON22212.…	Hippocampus.Single.WGS.ON22212.Neuron-#16|7,Hippocampus.Single.WGS.ON22212.Neuron-#19|2,Hippocampus.Single.WGS.ON22212.Neuron-#7|7,Hippocampus.Single.WGS.ON22213.Neuron-#15|1,Hippocampus.Single.WGS.ON22213.Neuron-#25|15,Liver.Bulk.WGS.ON22212|13,Liver.Bulk.WGS.ON22213|8,Hippocampus.Single.RC-seq.ON22212.Neuron-#16|5,Hippocampus.Single.RC-seq.ON22213.Neuron-#25|4	TGGCAGGTCATTGGGGGGAACCCGGGGGGGGGCGCTTGGAGTTCGCCGCTATCCCGCCCAGGCACACCCCCCGGGACAACAGGGTTAAAAACCGTAAACAAAAAAAAAAAAAAAAAAAAAAAAAAAAAGTTAAGAAAGCCTGCTCTAGAAAATAAAGTTTAAATTCCTTTCTCAGGTATTCGAAGCCTTATGCAATCTCTCTCAAACTCACTTTTTAAAACGTATTTTCTACTATCCTCTTTCCATCCAATATGCATTAAAACACA	GCACATGGTTTGGCATATAGCACGCATTCAATAACTAACTGTTAAATAGAAGAAAACTTTCAGTGACTCCACGCTCCTTAGATCAGTAGTTCTTAATCTTTAGTGAGTAGAATAATGACTTTTATATGTTAAAAACTTATTCAGAATTCAGAATACCAACTCCATTGTTACTGGTTTAGTAATCGAGATATTCAATGTAAGGCCTATGAATATGAACATGATTGTTTAAGAGGCATTTCAGGAGATTCTGATAGAAGAGATTAAAAGTTAAGAAAGGGCCGGGCGCGGTGGCTCAAGCCTGTAATCCCAGCACTTTGGGAGGCCGAGGCGGGCGGATCACAAGGTCAGGAGATCGAGACCACAGTGAAACCCCGTCTCTACTAAAAATACAAAAAATTA…	TTCTGGTTTATTAATCGAGATATTCAATGTAAGGCCTATGAATATGAACATGATTGTTTAAGAGGCATTTCAGGAGATTCTGATAGAAGAGATTAAAAGTTAAGAAAGGGCCGGGCGCGGTGGCTCAAGCCTGTAATCCCAGCACTTTGGGAGGCCGAGGCGGGCGGATCACAAGGTCAGGAGATCGAGACCACAGTGAAACCCCGTCTCTACTAAAAATACAAAAAATTAGCCGGGCGCGGTGGCGGGCGCCTGTAGTCCCAGCTACTCAGGAGGCTGAGGCAGGAGAATGGCGGGACCCCGGGAGGCGGAGCTTGCAGTGAGCCGAGATCGCGCCACTGCACTCCAGCCTGGACAACAGCGTGAGACTCCGTCTCAAAAAAAAAAAAAAAAAAAAAA…	TTCTGGTTTATTAATCGAGATATTCAATGTAAGGCCTATGAATATGAACATGATTGTTTAAGAGGCATTTCAGGAGATTCTGATAGAAGAGATTAAAAGTTAAGAAAGGGCCGGGCGCGGTGGCTCAAGCCTGTAATCCCAGCACTTTGGGAGGCCGAGGCGGGCGGATCACAAGGTCAGGAGATCGAGACCACAGTGAAACCCCGTCTCTACTAAAAATACAAAAAATTAGCCGGGCGCGGTGGCGGGCGCCTGTAGTCCCAGCTACTCAGGAGGCTGAGGCAGGAGAATGGCGGGACCCCGGGAGGCGGAGCTTGCAGTGAGCCGAGATCGCGCCACTGCACTCCAGCCTGGACAACAGCGTGAGACTCCGTCTCAAAAAAAAAAAAAAAAAAAAAA…
7b80a2d7-d7b8-4cbd-a93a-07c40bf15036	Chr1	145602576	145602561	ALU	Alu_YRa4	0	269	+	+	N	AAGAAAATGCAAATTA	Hippocampus.Single.WGS.ON22213.Neuron-#23|3,Hippocampus.Single.WGS.ON22213.Neuron-#25|1,Hippocampus.Single.WGS.ON22213.Neuron-#31|4,Hippocampus.Single.WGS.ON22213.Neuron-#38|10,Hippocampus.Single.WGS.ON22213.Neuron-#47|1,Hippocampus.Single.WGS.ON22213.Neuron-#49|56,Liver.Bulk.WGS.ON22213|10,Hippocampus.Single.RC-seq.ON22213.Neuron-#31|3,Hippocampus.Single.RC-seq.ON22213.Neuron-#38|7,Hippocampus.S…	Hippocampus.Single.WGS.ON22213.Neuron-#23|2,Hippocampus.Single.WGS.ON22213.Neuron-#31|7,Hippocampus.Single.WGS.ON22213.Neuron-#38|8,Hippocampus.Single.WGS.ON22213.Neuron-#49|44,Liver.Bulk.WGS.ON22213|16,Hippocampus.Single.RC-seq.ON22213.Neuron-#23|2,Hippocampus.Single.RC-seq.ON22213.Neuron-#31|1,Hippocampus.Single.RC-seq.ON22213.Neuron-#38|9	GCAGGAGAATCGCTTGAGTCCAGGAGGTGGAGGTTGGAGTGAGCCGAGATGTACTCCAGCCTGGGGTACAAGAGTGAGACTCTGTCTCAAAAATAATAACAATAATAATAATATTCAATATTATTACTCATTAAGAAAATGCAAATTAGGCCGGGCGCAGTGGCTCAAGCCTGTAATCCCAGCACTTTGGGAGGCCGAGACGGGCGGATCACGAGGTCAGGAGAGGTCTCG	GGGAGGCTGGGGCAGGAGAATGGCGTGAACCCGGGAGGCGGAGCTTGCAGTGAGCTGAGATCCGGCCACTGAACTCCACCCCGGGTGACAGAGCGACACCCCGTCTAAAAAAAAAAAAAAAAAGAAAATGCAAATTAAAACAACAGTGAGATATAATTGCACACCTATCCAGAGAATTTGGCCACATTGAGCTCTTCATGTACATAGTCAAGTGGGCAGAAAAATAAATACTGGTTCAAGTAATCAAAAGTTTGGTGCTGCTGTCCTCTA	TCAAAAATAATAACAATAATAATAATATTCAATATTATTACTCATTAAGAAAATGCAAATTAGGCCGGGCGCGGGGGCTCAAGCCTGTAATCCCAGCACTTTGGGAGGCCGAGACGGGCGGATCACGAGGTCAGGAGATCGAGACCATCCTGGGTAACACAGTGAAACCCTGTCTCTACTAAAAATACAAAAACGTAGCCGGGCGAGGTGGCAGGCGCCTGTAGTCCCAGCTACTCGGGAGGCTGAGGCAGGAGAATGGCGTGAACCCGGGAGGCGGAGCTTGCAGTGAGCTGAGATCCGGCCACTGCACTCCAGCCTGGGTGACAGAGCGAGACTCCGTCTCAAAAAAAAAAAAAAAAGAAAATGCAAATTAAAACAACAGTGAGATATAATTGCACA…	TCAAAAATAATAACAATAATAATAATATTCAATATTATTACTCATTAAGAAAATGCAAATTAGGCCGGGCGCGGGGGCTCAAGCCTGTAATCCCAGCACTTTGGGAGGCCGAGACGGGCGGATCACGAGGTCAGGAGATCGAGACCATCCTGGGTAACACAGTGAAACCCTGTCTCTACTAAAAATACAAAAACGTAGCCGGGCGAGGTGGCAGGCGCCTGTAGTCCCAGCTACTCGGGAGGCTGAGGCAGGAGAATGGCGTGAACCCGGGAGGCGGAGCTTGCAGTGAGCTGAGATCCGGCCACTGCACTCCAGCCTGGGTGACAGAGCGAGACTCCGTCTCAAAAAAAAAAAAAAAAGAAAATGCAAATTAAAACAACAGTGAGATATAATTGCACA…
414e7850-7878-4b76-b693-0ab8ac7593ed	Chr1	145950491	145950505	ALU	Alu_YRa4	0	270	+	+	N	AGAAATTACCTCTTA	Hippocampus.Single.WGS.ON22212.Neuron-#19|23,Hippocampus.Single.WGS.ON22212.Neuron-#21|5,Hippocampus.Single.WGS.ON22212.Neuron-#37|1,Hippocampus.Single.WGS.ON22212.Neuron-#7|22,Liver.Bulk.WGS.ON22212|12,Hippocampus.Single.RC-seq.ON22212.Neuron-#19|10,Hippocampus.Single.RC-seq.ON22212.Neuron-#21|2,Hippocampus.Single.RC-seq.ON22212.Neuron-#7|8	Hippocampus.Single.WGS.ON22212.Neuron-#19|19,Hippocampus.Single.WGS.ON22212.Neuron-#21|11,Hippocampus.Single.WGS.ON22212.Neuron-#37|2,Hippocampus.Single.WGS.ON22212.Neuron-#7|29,Liver.Bulk.WGS.ON22212|15,Hippocampus.Single.RC-seq.ON22212.Neuron-#19|8,Hippocampus.Single.RC-seq.ON22212.Neuron-#21|1,Hippocampus.Single.RC-seq.ON22212.Neuron-#7|7	TTGGCAGGCGTCTGGGGTTAACCCGGGTGGGGGCGGTTGCCGTTTTCTGTTATCCGGCCACTGCACTACACCCGGGGTGAAATTGGGCTACTCCGTCAAAAAAAAAAAAAAAAAAAAAAAAAGAAATTACCTCTTAATCCATTGGCTGCAGAATGTATGTTGTTAGAAAGCATGAAAACAACATTCATCTCCTTGGTATATATCTCCATTGGTGCCCTTGAGTTGCTGTGTGAGCATATTGCCAATGGGCAGAAATATTTTGAAAGGAATCTTT	GAGTGTTAGGTATTATGCTGATTATCTGGGTAACGAAATTATCTGTACAACAAACCTCCACAACATGCAATTTACACATGTAACAAACCTGCATACTTACCCCTTGAATATAAAATAAAAGTTGGAAAGAAAAATGAATAAATAAAATACAAAGAATGGTGAATCCTTTCCAAAAGGATTTCATTTGGCTTTGCCCAAATACATCAGAGGAATCACTGTTGATGTCTGCTATAGCCTTACAAAATGTATTTTTTAAATAATAAGACTTAAAAGTAGAAATTACCTCTTGGCCGGGCGTGGTGGCTCAAGCCTGTAATCCCAGCACTTTGGGAGGCCGAGACGGGCGGATCACGAGGTCGGGAGATCGAGACCATCCTGGTTAACACGGTGAAACCCCGT…	TTTACCCAAATACATCAGAGGAATCACTGTTGATGTCTGCTATAGCCTTACAAAATGTATATTTTAAATAATAAGACTTAAAAGTAGAAATTACCTCTTGGCCGGGCGTGGTGGCTCAAGCCTGTAATCCCAGCACTTTGGGAGGCCGAGACGGGCGGATCACGAGGTCGGGAGATCGAGACCATCCTGGTTAACACGGTGAAACCCCGTCTCTACTAAAAAATACAAAAAGCTAGCCGGGCGACGTGGCGGGCGTCTGTAGTCCCAGCTACTCGGGAGGCTGAGGCAGGAGAATGGCGTGAACCCGGGAGGCGGAGCTTGCAGTGAGCTGAGATCCGGCCACTGCACTCCAGCCTGGGTGACAGAGCGAGACTCCGTCTCAAAAAAAAAAAAAAAAAA…	TTTACCCAAATACATCAGAGGAATCACTGTTGATGTCTGCTATAGCCTTACAAAATGTATATTTTAAATAATAAGACTTAAAAGTAGAAATTACCTCTTGGCCGGGCGTGGTGGCTCAAGCCTGTAATCCCAGCACTTTGGGAGGCCGAGACGGGCGGATCACGAGGTCGGGAGATCGAGACCATCCTGGTTAACACGGTGAAACCCCGTCTCTACTAAAAAATACAAAAAGCTAGCCGGGCGACGTGGCGGGCGTCTGTAGTCCCAGCTACTCGGGAGGCTGAGGCAGGAGAATGGCGTGAACCCGGGAGGCGGAGCTTGCAGTGAGCTGAGATCCGGCCACTGCACTCCAGCCTGGGTGACAGAGCGAGACTCCGTCTCAAAAAAAAAAAAAAAAAA…
1cbd7eaa-056e-4e03-8d04-a2ef1387e9fd	Chr1	147543263	147543279	L1	L1_RS2	4622	6299	-	-	N	AAAACCCACATCTTTTA	Hippocampus.Single.WGS.ON22212.Neuron-#17|2,Hippocampus.Single.WGS.ON22212.Neuron-#19|20,Hippocampus.Single.WGS.ON22212.Neuron-#7|3,Liver.Bulk.WGS.ON22212|11,Hippocampus.Single.RC-seq.ON22212.Neuron-#7|1	Hippocampus.Single.WGS.ON22212.Neuron-#19|36,Hippocampus.Single.WGS.ON22212.Neuron-#21|25,Hippocampus.Single.WGS.ON22212.Neuron-#7|5,Liver.Bulk.WGS.ON22212|15,Hippocampus.Single.RC-seq.ON22212.Neuron-#19|4,Hippocampus.Single.RC-seq.ON22212.Neuron-#21|2,Hippocampus.Single.RC-seq.ON22212.Neuron-#7|3	GTAGTATAGTTTGAAGTCAGGTAGCGTGATGCCTCCAGCTTTGTTCTTTTGACTTAGGATTGTCTTGGAGATGCGGGCTCTTTTTTGGTTCCATATGAACTTTAAAGCAGTTTTTTCCAATAAAACCCACATCTTTTAAAGGCTATTTGTAAACCTGCTCAACCTTGGAGACATTATCTTTACTTTATGCTAGGTCAGGAAACATACATGTTTTCTGTTTTCAAGGGAGACACTATCTCTATCTTCCAAGGCTGACTTGTTTAACAAA	CACAACAAGCCAGCAATCAGCATGAACTTCATGTTTACATTGGTTCTCTTTACCTGTCAAATCCTAATGGGGAGATTTGGTGGCACACCTAGGTGATGATGTGCACGTGGTGGGTATACATTGCAAATTTAAAAACCCACATCTTTTATTTTATTTATTTAGTGAT	TGTCTCCAAGGTTGAGCAGGTTTACAAATAGCCTTTAAAAGATGTGGGTTTTATTGGAAAAAACTGCTTTAAAGTTCATATGGAACCAAAAAAGAGCCCGCATCTCCAAGACAATCCTAAGTCAAAAGAACAAAGCTGGAGGCATCACGCTACCTGACTTCAAACTATACTACAAGGCTACAGTAACCAAAACAGCATGGTACTGGTACCAAAACAGAGATATAGACGAATGGAACAGAACAGAGTCCTCAGAAATAATACCACACATCTACAGCCATTTGATCTTTGACAAACCTGAGAGAAACAAGAAATGGGGAAAGGATTCCCTATTTAATACAAATGGTGCTGAGATAATTGGCTAGCCATAAGTAGAAAGCTGAAACTGGATCCTTTCCTTAC…	CCATTATGGAAAACAGTATGGCGATTCCTCAAGGATCTAGAACTAGATGTACCATATGACCCAGCCATCCCATTACTGGGTATATACCCAAAGGATTATAAATTATGCTGCTATAAAGACACATGCACACGTATGTTTATTGCAGCACTATTCACAATAGCTAAGACTTGGACTCAACCCAAATGTCCATCAGTGACAGATTGGATTAAGAAAATGTGGCACATATACACCATGGAATACTATGCAGCCATAAAAAAGGATGAGTTTGAGTCCTTTGTAGGGACTTGGATGCAGCTGGAATCCGTCATTCTTAGCAAACTCATCACAAGAACAGAAAACCAAACACCGCATGTTCTCACTCATAGGTGGGAACTGAAAAATGAGATCACTCGGACTCAG…
e3b35bee-e9d8-4aee-a0fc-c912242424cb	Chr1	147632773	147632788	ALU	Alu_YRa4	0	270	-	-	N	CCAGATTTCTTTTTCT	Hippocampus.Single.WGS.ON22212.Neuron-#17|7,Hippocampus.Single.WGS.ON22212.Neuron-#19|1,Hippocampus.Single.WGS.ON22212.Neuron-#21|1,Hippocampus.Single.WGS.ON22212.Neuron-#37|23,Hippocampus.Single.WGS.ON22212.Neuron-#7|7,Hippocampus.Single.WGS.ON22213.Neuron-#15|6,Hippocampus.Single.WGS.ON22213.Neuron-#23|15,Liver.Bulk.WGS.ON22212|34,Liver.Bulk.WGS.ON22213|9,Hippocampus.Single.RC-seq.ON22212.Neuro…	Hippocampus.Single.WGS.ON22212.Neuron-#17|6,Hippocampus.Single.WGS.ON22212.Neuron-#19|1,Hippocampus.Single.WGS.ON22212.Neuron-#37|31,Hippocampus.Single.WGS.ON22212.Neuron-#7|10,Hippocampus.Single.WGS.ON22213.Neuron-#15|18,Hippocampus.Single.WGS.ON22213.Neuron-#23|12,Hippocampus.Single.WGS.ON22213.Neuron-#31|2,Liver.Bulk.WGS.ON22212|39,Liver.Bulk.WGS.ON22213|14,Hippocampus.Single.RC-seq.ON22212.Ne…	GCATGCCCACACCTTGGGATTCTCCCTGCTATCAAGGCGGAAGGCACCGGCTTTGATGCTGCAGCTCACATTAAATCCTTTGTTCTCTCAGAGCTGATTCAAAAGGCCTTAAGATCACCATGAGGGTTTGTCGATCATACTAGTGTGTTTGGATTTTAATTTCAAGGCAGTGGGGATGCACCAAGATTCTTGAAGGAGGAAAATGCTGATCAAATTTCCATTTTAGAAAAAGAAATCTGGGCCGGGCGCGGTGGCTCAAGCCTGTAATCCCAGCACTTTGGAAGGCCGAGATGGGTGGATCACGAGGTCAGGAGATCAAGACCATCCGGGCTAACACGGTGAAACCCCGTCTCTACTAAAAAAATACAAAAAATTAGCCGGGCGTGGTGGCGGGCGCCT…	GCATGCCCACACCTTGGGATTCTCCCTGCTATCAAGGCGGAAGGCACCGGCTTTGATGCTGCAGCTCACATTAAATCCTTTGTTCTCTCAGAGCTGATTCAAAAGGCCTTAAGATCACCATGAGGGTTTGTCGATCATACTAGTGTGTTTGGATTTTAATTTCAAGGCAGTGGGGATGCACCAAGATTCTTGAAGGAGGAAAATGCTGATCAAATTTCCATTTTAGAAAAAGAAATCTGGGCCGGGCGCGGTGGCTCAAGCCTGTAATCCCAGCACTTTGGAAGGCCGAGATGGGTGGATCACGAGGTCAGGAGATCAAGACCATCCGGGCTAACACGGTGAAACCCCGTCTCTACTAAAAAAATACAAAAAATTAGCCGGGCGTGGTGGCGGGCGCCT…	GTCGATCATACTAGTGTGTTTGGATTTTAATTTCAAGGCAGTGGGGATGCACCAAGATTCTTGAAGGAGGAAAATGCTGATCAAATTTCCATTTTAGAAAAAGAAATCTGGGCCGGGCGCGGTGGCTCAAGCCTGTAATCCCAGCACTTTGGGAGGCCGAGATGGGTGGATCACGAGGTCAGGAGATCAAGACCATCCGGGCTAACACGGTGAAACCCCGTCTCTACTAAAAAAATACAAAAAATTAGCCGGGCGTGGTGGCGGGCGCCTGTAGTCCCAGCTACTCGGGAGGCTGAGGCAGGAGAATGGCGTAAACCCGGGTAGGCGGAGCTTTCAGTGAGCTGAGATCCGGCCACTGTACTCCAGCCTGGGTGACAGAGCGAGACTCCGTCTCAAAAA…	GTCGATCATACTAGTGTGTTTGGATTTTAATTTCAAGGCAGTGGGGATGCACCAAGATTCTTGAAGGAGGAAAATGCTGATCAAATTTCCATTTTAGAAAAAGAAATCTGGGCCGGGCGCGGTGGCTCAAGCCTGTAATCCCAGCACTTTGGGAGGCCGAGATGGGTGGATCACGAGGTCAGGAGATCAAGACCATCCGGGCTAACACGGTGAAACCCCGTCTCTACTAAAAAAATACAAAAAATTAGCCGGGCGTGGTGGCGGGCGCCTGTAGTCCCAGCTACTCGGGAGGCTGAGGCAGGAGAATGGCGTAAACCCGGGTAGGCGGAGCTTTCAGTGAGCTGAGATCCGGCCACTGTACTCCAGCCTGGGTGACAGAGCGAGACTCCGTCTCAAAAA…
ebb880f5-0fee-4dd5-b874-a03955552295	Chr1	148524248	148524235	ALU	Alu_YRb4	0	258	+	+	N	AAATTATTTACATT	Hippocampus.Single.WGS.ON22212.Neuron-#21|4,Hippocampus.Single.WGS.ON22212.Neuron-#37|31,Hippocampus.Single.WGS.ON22213.Neuron-#39|2,Liver.Bulk.WGS.ON22212|11,Liver.Bulk.WGS.ON22213|13,Hippocampus.Single.RC-seq.ON22212.Neuron-#16|2,Hippocampus.Single.RC-seq.ON22212.Neuron-#19|1	Hippocampus.Single.WGS.ON22212.Neuron-#19|7,Hippocampus.Single.WGS.ON22212.Neuron-#21|5,Hippocampus.Single.WGS.ON22212.Neuron-#37|27,Hippocampus.Single.WGS.ON22213.Neuron-#38|1,Liver.Bulk.WGS.ON22212|16,Liver.Bulk.WGS.ON22213|10,Hippocampus.Single.RC-seq.ON22212.Neuron-#19|5,Hippocampus.Single.RC-seq.ON22212.Neuron-#37|1,Hippocampus.Single.RC-seq.ON22213.Neuron-#38|2	AGACGGAGTCTCGCTCTGTCGCCCAGGCTGGAGTGCAGTGGCACGATCTCGGCTCACTGCAAGCTCCACCTCCCGGGTTCACGCCATTCTCCTGCCTCAGCCTCCCGAGTAGCTGGGACTACAGGCGCCCACAACCGCGCCCGGCTAATTTTTTGTATTTTTAGTAGAGACGGGGTTTCACCGTGGTCTCGATCTCCTGACCTTGTGATCTGCCCGCCTTGGCCTCCCAAAGTGCTGGGATTACAGGCGTGAGCCACCGCGCCCGGCCAATGTAAATAATTTAATAAAAATATAATATTGCTACCTACTTTTAAATTTAATTATTATTTTCTAACACAGTATCCTTAGTGCCTAGCACAATCCTTGCAATGTATAGGGTCTGAATAATTATATGCTAAA…	CTGAGGCAGGTGCATGGCGTGAACCCGGGAGGTGGAGCTTGCAGTGCGCCGAGATCGTGCCACTGCACTCCAGCCTGGGCTACAGAGCGAGACTCCGTCTAAAAAAAAAAAAAAAAAAAAAAATTATTTACATTAGAAAATAATATTGTAAAGTAATACTAAAAGCACTATTTTAAACTATTGGGTTAGAATACTTTGAAAACGATACTGTATGCTTGAACATGGGAGCGGGGCAG	TGTGTTAGAAAATAATAATTAAATTTAAAAGTAGGTAGCAATATTATATTTTTATTAAATTATTTACATTGGCCGGGCGCGGTGGCTCACGCCTGTAATCCCAGCACTTTGGGAGGCCAAGGCGGGCAGATCACAAGGTCAGGAGATCGAGACCACGGTGAAACCCCGTCTCTACTAAAAATACAAAATAATAATAGCCGGGCGCGGTTGTGGGCGCCTGTAGTCCCAGCTACTCGGGAGGCTGAGGCAGGAGAATGGCGTGAACCCGGGAGGTGGAGCTTGCAGTGAGCCGAGATCGTGCCACTGCACTCCAGCCTGGGCGACAGAGCGAGACTCCGTCTCAAAAAAAAAAAAAAAAAAAAAATTATTTACATTAGAAAATAATATTGTAAAGTAATA…	TGTGTTAGAAAATAATAATTAAATTTAAAAGTAGGTAGCAATATTATATTTTTATTAAATTATTTACATTGGCCGGGCGCGGTGGCTCACGCCTGTAATCCCAGCACTTTGGGAGGCCAAGGCGGGCAGATCACAAGGTCAGGAGATCGAGACCACGGTGAAACCCCGTCTCTACTAAAAATACAAAATAATAATAGCCGGGCGCGGTTGTGGGCGCCTGTAGTCCCAGCTACTCGGGAGGCTGAGGCAGGAGAATGGCGTGAACCCGGGAGGTGGAGCTTGCAGTGAGCCGAGATCGTGCCACTGCACTCCAGCCTGGGCGACAGAGCGAGACTCCGTCTCAAAAAAAAAAAAAAAAAAAAAATTATTTACATTAGAAAATAATATTGTAAAGTAATA…
d2b7310c-2e7c-43e0-87d2-6c2c889cd8b3	Chr1	148531679	148531663	ALU	Alu_YRc2	0	269	+	+	N	AGAAGACATGACCCCAG	Hippocampus.Single.WGS.ON22212.Neuron-#21|5,Hippocampus.Single.WGS.ON22212.Neuron-#7|2,Hippocampus.Single.WGS.ON22213.Neuron-#49|27,Liver.Bulk.WGS.ON22212|18,Liver.Bulk.WGS.ON22213|14	Hippocampus.Single.WGS.ON22212.Neuron-#21|6,Hippocampus.Single.WGS.ON22213.Neuron-#49|18,Liver.Bulk.WGS.ON22212|15,Liver.Bulk.WGS.ON22213|11	TAACATAAGAAAAGTTTTGTTTGGGTACCTCTTTCATTTCTTTCATAAATGTTGATGAATTTGTTTCGATATCATCATCAGTACTGAGTCTTGTAAAAATTTGTTTAGCAATTCTAAAGGAAGAATATTCTGCTGGAACATATGATCCTGTAAAATATAAGGTCAAGATAAATTGAAATGTGTTTATAAAATATAAGTACTAATTACATTTTGCACTTATCAGATTATTTACAAGGATTATATGGTAGAAAGAACACTAGATATGGCCTTAGAAGACATGACCCCAGCCCGGCCGGGCGCGGTGGCTCACGCCTGTAATCCCTGCACTTTGGGAGGCTGAGGCGGGCGGATCACGAGGTCAGGAGATCGAGACCATCCTGGCTAACACGGTGAAACCCC…	TAATGGGTTGGATGTGGATTTTTAATGTCGCGAACCGGGGTGGCGTTGCTTGATGTTAGCCGTTATGGTGCCACTGAACTCCTGCTTGGGCGAAAATTTGATGAATCCGCCTCAAAAAAAAAAAAAAGAAGACATGACCCCAGCCCTATTCCTTATTATACAAGCTTAAACAGCACTTAAACTTTCCCAGTTCTAGCCGGGAGTGGTGGTGGGAAACTGTGGTGCCCAGCTACTCCGGAGGCTGGAAAGG	TACTAATTACATTTTGCACTTATCAGATTATTTACAAGGATTATATGGTAGAAAGAACACTAGATATGGCCTTAGAAGACATGACCCCAGCCCGGCCGGGCGCGGTGGCTCACGCCTGTAATCCCTGCACTTTGGGAGGCTGAGGCGGGCGGATCACGAGGTCAGGAGATCGAGACCATCCTGGCTAACACGGTGAAACCCCGTCTCTACTAAAATACAAAAAATTAGCCGGGCGCGTTTGCTGGCGCCTGTAGTCCCAGCTACTCGGGAGGCTGAGGCAGGAGAATGGCGCGAACCCGGGAGGCGGAGCTTGCAGTGAGCCGAGATGGTGCCACTGCACTCCAGCCTGGGCGACAAAGTGAAGACTCCGCCTCAAAAAAAAAAAAAAGAAGACATGAC…	TACTAATTACATTTTGCACTTATCAGATTATTTACAAGGATTATATGGTAGAAAGAACACTAGATATGGCCTTAGAAGACATGACCCCAGCCCGGCCGGGCGCGGTGGCTCACGCCTGTAATCCCTGCACTTTGGGAGGCTGAGGCGGGCGGATCACGAGGTCAGGAGATCGAGACCATCCTGGCTAACACGGTGAAACCCCGTCTCTACTAAAATACAAAAAATTAGCCGGGCGCGTTTGCTGGCGCCTGTAGTCCCAGCTACTCGGGAGGCTGAGGCAGGAGAATGGCGCGAACCCGGGAGGCGGAGCTTGCAGTGAGCCGAGATGGTGCCACTGCACTCCAGCCTGGGCGACAAAGTGAAGACTCCGCCTCAAAAAAAAAAAAAAGAAGACATGAC…
[truncated: 3,346 more rows]

## Sheet: somatic
UUID	Chromosome	5_Prime_End	3_Prime_End	Superfamily	Subfamily	TE_Align_Start	TE_Align_End	Orient_5p	Orient_3p	Inversion	TSD	Sample_support_5p	Sample_support_3p	Animal_count	Genomic_Consensus_5p	Genomic_Consensus_3p	Insert_Consensus_5p	Insert_Consensus_3p	Insertion_capillary_sequence	Validation information
[truncated: 1 more rows]
