# Supplementary material for: Somatic retrotransposition in the developing rhesus macaque brain
Source: HighWire-hosted journal article supplement (doi:10.1101/gr.276451.121), 2022-06-21
Supplement: Supplemental_Table_S3.xlsx [file Supplemental_Table_S3.xlsx]

## Sheet: ONT TE methylation
Supplemental Table S3. Methylation statistics for reference TEs derived from ONT data. Columns are as follows: seg_chrom, seg_start, seg_end: position of the reference TE. seg_name: subfamily name. seg_strand: + or - indicating the orientation of the TE relative to the genome assembly. *_meth_calls: number of methylated CpG calls for each sample. *_unmeth_calls: number of unmethylated CpG calls f…
seg_chrom	seg_start	seg_end	seg_name	seg_strand	ON22213.Hippocampus.ONT.CpG_meth_calls	ON22213.Hippocampus.ONT.CpG_unmeth_calls	ON22213.Hippocampus.ONT.CpG_no_calls	ON22213.Hippocampus.ONT.CpG_methfrac	ON22213.Hippocampus.ONT.CpG_readcount	ON22213.Liver.ONT.CpG_meth_calls	ON22213.Liver.ONT.CpG_unmeth_calls	ON22213.Liver.ONT.CpG_no_calls	ON22213.Liver.ONT.CpG_methfrac	ON22213.Liver.ONT.CpG_readcount	methfrac_difference	methfrac_difference_bonferroni_p
Chr1	1320	1629	AluYRa1	+	0	0	0	NaN	0	9	0	0	1	1	NaN	1
Chr1	22263	22564	AluYRa1	-	43	1	36	0.977273	4	43	3	34	0.934783	4	0.0424901	1
Chr1	36391	36704	AluYRa1	+	84	2	61	0.976744	7	75	2	28	0.974026	5	0.00271821	1
Chr1	51485	51789	AluYRa1	-	25	4	28	0.862069	3	40	10	52	0.8	6	0.062069	1
Chr1	60761	61068	AluYRa1	-	16	3	13	0.842105	2	10	0	6	1	1	-0.157895	1
Chr1	67372	67677	AluYRa1	+	31	13	28	0.704545	4	3	1	14	0.75	1	-0.0454545	1
Chr1	95617	95924	AluYRa1	+	46	0	34	1	4	75	5	40	0.9375	6	0.0625	1
Chr1	123141	123444	AluYRa1	+	33	11	20	0.75	4	47	6	52	0.886792	6	-0.136792	1
Chr1	332806	333109	AluYRa1	-	40	4	26	0.909091	5	40	11	19	0.784314	5	0.124777	1
Chr1	541210	541517	AluYRa1	+	11	2	3	0.846154	2	11	12	21	0.478261	7	0.367893	1
Chr1	565670	565975	AluYRa1	+	15	0	5	1	1	31	3	6	0.911765	2	0.0882353	1
Chr1	575395	581535	L1_RS2	+	64	23	62	0.735632	3	104	83	162	0.55615	7	0.179482	1
Chr1	649160	649462	AluYRa1	-	34	1	7	0.971429	2	13	2	24	0.866667	2	0.104762	1
Chr1	787628	793779	L1_RS2	-	145	18	84	0.889571	6	91	48	87	0.654676	9	0.234894	0.00253952
Chr1	930986	931288	AluYRa1	+	29	0	18	1	3	121	6	71	0.952756	9	0.0472441	1
Chr1	1068947	1069254	AluYRa1	+	44	3	47	0.93617	5	41	2	17	0.953488	3	-0.0173182	1
Chr1	1090246	1090564	AluYRa1	-	37	7	28	0.840909	4	79	13	6	0.858696	6	-0.0177866	1
Chr1	1402282	1402592	AluYRa1	-	30	9	26	0.769231	4	17	3	22	0.85	3	-0.0807692	1
Chr1	1510274	1510583	AluYRa1	-	16	0	15	1	3	7	1	38	0.875	2	0.125	1
Chr1	1579601	1579906	AluYRa1	-	13	3	5	0.8125	3	17	5	17	0.772727	3	0.0397727	1
Chr1	1664846	1665166	AluYRa1	+	28	0	12	1	2	56	2	24	0.965517	5	0.0344828	1
Chr1	1721264	1721580	AluYRa1	-	48	0	36	1	4	28	0	16	1	3	0	1
Chr1	1734114	1734415	AluYRa1	-	32	5	26	0.864865	5	40	7	21	0.851064	5	0.013801	1
Chr1	1736223	1736527	AluYRa1	-	16	2	40	0.888889	4	52	33	67	0.611765	8	0.277124	1
Chr1	1739920	1740221	AluYRa1	+	35	8	32	0.813953	5	39	1	45	0.975	6	-0.161047	1
Chr1	1750803	1751106	AluYRa1	+	48	1	31	0.979592	4	17	3	20	0.85	2	0.129592	1
Chr1	1763985	1764292	AluYRa1	-	49	5	16	0.907407	5	42	8	48	0.84	7	0.0674074	1
Chr1	1820618	1820935	AluYRa1	-	22	2	52	0.916667	4	33	5	30	0.868421	4	0.0482456	1
Chr1	1853356	1853661	AluYRa1	-	14	0	52	1	4	85	0	35	1	6	0	1
Chr1	1864292	1864606	AluYRa1	+	12	0	18	1	2	28	0	17	1	3	0	1
Chr1	1887541	1887864	AluYRa1	-	33	4	32	0.891892	3	41	9	69	0.82	6	0.0718919	1
Chr1	1927409	1927718	AluYRa1	-	20	1	1	0.952381	1	37	1	50	0.973684	4	-0.0213033	1
Chr1	1934164	1934472	AluYRa1	+	36	2	38	0.947368	4	18	7	32	0.72	3	0.227368	1
Chr1	1941578	1941880	AluYRa1	+	25	0	17	1	2	40	21	44	0.655738	5	0.344262	1
Chr1	1952065	1952427	MacERV1_LTR4	-	12	3	3	0.8	2	8	2	8	0.8	2	0	1
Chr1	1958123	1958493	MacERV1_LTR4	-	7	3	18	0.7	4	10	2	9	0.833333	3	-0.133333	1
Chr1	1969927	1970240	AluYRa1	-	38	2	20	0.95	3	67	4	49	0.943662	6	0.00633803	1
Chr1	1977488	1977791	AluYRa1	+	4	0	18	1	2	19	2	33	0.904762	3	0.0952381	1
Chr1	1982416	1982724	AluYRa1	-	0	0	0	NaN	0	9	1	21	0.9	2	NaN	1
Chr1	2009046	2009352	AluYRa1	-	36	3	21	0.923077	4	19	0	9	1	2	-0.0769231	1
Chr1	2015561	2015867	AluYRa1	+	87	0	17	1	6	63	1	36	0.984375	5	0.015625	1
Chr1	2042899	2043210	AluYRa1	-	17	0	5	1	2	0	0	0	NaN	0	NaN	1
Chr1	2044380	2044696	AluYRa1	-	4	4	28	0.5	2	2	5	29	0.285714	2	0.214286	1
Chr1	2057331	2057641	AluYRa1	-	23	10	47	0.69697	5	55	0	57	1	7	-0.30303	0.928529
Chr1	2062023	2062333	AluYRa1	-	24	0	42	1	3	67	6	59	0.917808	6	0.0821918	1
Chr1	2068708	2069016	AluYRa1	+	49	3	28	0.942308	5	0	0	0	NaN	0	NaN	1
Chr1	2074942	2075250	AluYRa1	-	19	0	15	1	2	59	3	40	0.951613	6	0.0483871	1
Chr1	2089813	2090129	AluYRa1	-	76	4	58	0.95	8	37	3	21	0.925	4	0.025	1
Chr1	2097541	2097845	AluYRa1	-	54	2	32	0.964286	6	38	5	34	0.883721	6	0.0805648	1
Chr1	2110014	2110328	AluYRa1	-	16	0	5	1	1	21	16	47	0.567568	4	0.432432	1
Chr1	2114222	2114527	AluYRa1	+	6	2	13	0.75	2	37	2	41	0.948718	5	-0.198718	1
Chr1	2120726	2121033	AluYRa1	-	19	4	17	0.826087	2	26	9	65	0.742857	5	0.0832298	1
Chr1	2125838	2126143	AluYRa1	-	35	3	22	0.921053	3	15	0	42	1	3	-0.0789474	1
Chr1	2140800	2141107	AluYRa1	+	52	3	55	0.945455	5	56	0	40	1	5	-0.0545455	1
Chr1	2166851	2167156	AluYRa1	-	13	1	28	0.928571	2	62	1	65	0.984127	7	-0.0555556	1
Chr1	2233947	2234251	AluYRa1	+	11	1	29	0.916667	3	28	2	8	0.933333	2	-0.0166667	1
Chr1	2234883	2235185	AluYRa1	+	26	3	19	0.896552	4	15	3	5	0.833333	2	0.0632184	1
Chr1	2262306	2262614	AluYRa1	-	55	2	41	0.964912	5	44	1	35	0.977778	4	-0.0128655	1
Chr1	2319285	2319591	AluYRa1	-	0	0	0	NaN	0	62	2	30	0.96875	6	NaN	1
Chr1	2323553	2323861	AluYRa1	+	14	4	24	0.777778	2	0	0	0	NaN	0	NaN	1
Chr1	2329779	2330082	AluYRa1	+	28	8	30	0.777778	6	16	3	14	0.842105	3	-0.0643275	1
Chr1	2409085	2409392	AluYRa1	-	38	1	37	0.974359	5	13	0	53	1	3	-0.025641	1
Chr1	2411184	2411490	AluYRa1	-	30	1	29	0.967742	3	29	9	42	0.763158	4	0.204584	1
Chr1	2441453	2441761	AluYRa1	+	36	4	20	0.9	3	14	2	4	0.875	1	0.025	1
Chr1	2467494	2467801	AluYRa1	+	41	0	74	1	7	53	2	44	0.963636	6	0.0363636	1
Chr1	2471705	2472013	AluYRa1	+	21	3	56	0.875	5	60	7	69	0.895522	8	-0.0205224	1
Chr1	2502338	2502640	AluYRa1	-	6	3	31	0.666667	2	24	3	53	0.888889	4	-0.222222	1
Chr1	2549939	2550241	AluYRa1	-	26	3	32	0.896552	4	30	30	25	0.5	5	0.396552	1
Chr1	2691112	2691414	AluYRa1	-	30	6	39	0.833333	5	41	4	43	0.911111	5	-0.0777778	1
Chr1	2736742	2737048	AluYRa1	+	38	4	54	0.904762	6	31	0	17	1	3	-0.0952381	1
Chr1	2932500	2932809	AluYRa1	+	53	5	30	0.913793	4	38	10	40	0.791667	4	0.122126	1
Chr1	2945353	2945662	AluYRa1	+	21	1	8	0.954545	2	58	3	44	0.95082	7	0.00372578	1
Chr1	2951716	2952019	AluYRa1	+	59	5	44	0.921875	6	39	4	29	0.906977	4	0.0148983	1
Chr1	2973000	2973303	AluYRa1	+	47	7	41	0.87037	7	24	1	7	0.96	2	-0.0896296	1
Chr1	3128957	3129267	AluYRa1	-	68	0	68	1	8	29	1	21	0.966667	3	0.0333333	1
Chr1	3237623	3237925	AluYRa1	+	24	11	29	0.685714	4	32	8	64	0.8	7	-0.114286	1
Chr1	3287331	3287635	AluYRa1	+	30	7	80	0.810811	6	2	7	31	0.222222	2	0.588589	1
Chr1	3313455	3313767	AluYRa1	-	20	0	8	1	2	40	2	14	0.952381	4	0.047619	1
Chr1	3375310	3375612	AluYRa1	-	37	1	0	0.973684	2	50	0	26	1	4	-0.0263158	1
Chr1	3567754	3568074	AluYRa1	-	47	2	19	0.959184	4	55	3	44	0.948276	6	0.0109078	1
Chr1	3643697	3643998	AluYRa1	-	43	7	55	0.86	5	65	2	38	0.970149	5	-0.110149	1
Chr1	3714014	3714327	AluYRa1	-	30	6	40	0.833333	5	33	10	21	0.767442	4	0.0658915	1
Chr1	3736491	3736797	AluYRa1	-	19	2	9	0.904762	2	36	0	9	1	3	-0.0952381	1
Chr1	3745890	3746199	AluYRa1	-	14	0	10	1	2	9	0	3	1	1	0	1
Chr1	3783559	3783866	AluYRa1	+	52	7	55	0.881356	7	42	0	38	1	4	-0.118644	1
Chr1	3978962	3979273	AluYRa1	+	9	1	4	0.9	1	8	3	3	0.727273	1	0.172727	1
Chr1	3993476	3993779	AluYRa1	-	55	8	42	0.873016	7	14	2	14	0.875	2	-0.00198413	1
Chr1	4039162	4039465	AluYRa1	-	7	4	21	0.636364	2	59	1	60	0.983333	6	-0.34697	1
Chr1	4052812	4053120	AluYRa1	+	74	3	59	0.961039	8	26	0	33	1	4	-0.038961	1
Chr1	4090748	4091050	AluYRa1	+	17	2	5	0.894737	2	135	2	56	0.985401	11	-0.0906646	1
Chr1	4121257	4121562	AluYRa1	-	36	6	38	0.857143	4	70	15	95	0.823529	9	0.0336134	1
Chr1	4130114	4130435	AluYRa1	-	12	8	29	0.6	3	33	1	8	0.970588	2	-0.370588	1
Chr1	4136517	4136829	AluYRa1	-	36	2	52	0.947368	5	85	1	29	0.988372	7	-0.0410037	1
Chr1	4139417	4139722	AluYRa1	+	58	10	57	0.852941	8	29	1	18	0.966667	3	-0.113725	1
Chr1	4224455	4224759	AluYRa1	-	40	4	23	0.909091	4	4	0	14	1	1	-0.0909091	1
Chr1	4231118	4231433	AluYRa1	-	20	5	28	0.8	3	0	0	5	NaN	1	NaN	1
Chr1	4275991	4276306	AluYRa1	-	14	4	26	0.777778	3	69	5	49	0.932432	8	-0.154655	1
Chr1	4286848	4287156	AluYRa1	-	25	0	7	1	2	89	4	79	0.956989	8	0.0430108	1
Chr1	4299674	4299978	AluYRa1	+	86	4	48	0.955556	6	128	3	53	0.977099	8	-0.0215437	1
Chr1	4366930	4367243	AluYRa1	-	25	2	26	0.925926	3	31	0	29	1	3	-0.0740741	1
Chr1	4372109	4372417	AluYRa1	-	108	15	86	0.878049	11	14	2	33	0.875	3	0.00304878	1
Chr1	4391462	4391771	AluYRa1	+	46	14	32	0.766667	4	157	5	65	0.969136	10	-0.202469	0.534699
Chr1	4425637	4425940	AluYRa1	+	18	2	20	0.9	2	45	4	65	0.918367	6	-0.0183673	1
Chr1	4481549	4481856	AluYRa1	-	18	7	23	0.72	3	67	4	49	0.943662	6	-0.223662	1
Chr1	4500181	4500492	AluYRa1	-	42	1	31	0.976744	4	46	2	72	0.958333	6	0.0184109	1
Chr1	4563111	4563421	AluYRa1	-	80	0	22	1	5	25	20	18	0.555556	3	0.444444	1
Chr1	4633916	4634220	AluYRa1	+	15	3	54	0.833333	4	62	1	45	0.984127	6	-0.150794	1
Chr1	4636027	4636336	AluYRa1	+	16	0	53	1	3	41	0	28	1	3	0	1
Chr1	4662577	4662882	AluYRa1	-	36	14	50	0.72	6	15	21	43	0.416667	5	0.303333	1
Chr1	4673914	4674217	AluYRa1	+	30	11	54	0.731707	5	40	9	35	0.816327	5	-0.0846192	1
Chr1	4681760	4682065	AluYRa1	+	41	11	31	0.788462	5	27	0	36	1	4	-0.211538	1
Chr1	4744135	4744456	AluYRa1	+	48	1	20	0.979592	3	103	3	72	0.971698	9	0.00789372	1
Chr1	4873417	4873723	AluYRa1	+	47	0	29	1	4	66	4	25	0.942857	5	0.0571429	1
Chr1	5316414	5316727	AluYRa1	-	25	2	15	0.925926	3	12	2	14	0.857143	2	0.0687831	1
Chr1	5389476	5389790	AluYRa1	-	68	1	15	0.985507	4	69	0	36	1	5	-0.0144928	1
Chr1	5482381	5482684	AluYRa1	-	12	0	32	1	2	36	1	51	0.972973	4	0.027027	1
Chr1	5750749	5751058	AluYRa1	-	35	3	13	0.921053	3	52	0	16	1	4	-0.0789474	1
Chr1	5774610	5774914	AluYRa1	+	9	3	6	0.75	1	16	11	27	0.592593	3	0.157407	1
Chr1	5905759	5906065	AluYRa1	+	16	1	17	0.941176	2	13	1	20	0.928571	2	0.012605	1
Chr1	5937970	5938276	AluYRa1	-	12	3	36	0.8	3	68	2	32	0.971429	6	-0.171429	1
Chr1	6294106	6294407	AluYRa1	+	7	0	8	1	1	57	8	40	0.876923	7	0.123077	1
Chr1	6436772	6437079	AluYRa1	+	10	0	7	1	1	17	1	16	0.944444	2	0.0555556	1
Chr1	6604907	6605215	AluYRa1	-	34	8	32	0.809524	4	29	11	48	0.725	4	0.0845238	1
Chr1	6645325	6645636	AluYRa1	+	23	9	19	0.71875	3	5	1	14	0.833333	1	-0.114583	1
Chr1	6742161	6742466	AluYRa1	-	53	6	13	0.898305	4	73	8	49	0.901235	8	-0.00292948	1
Chr1	6941813	6942122	AluYRa1	+	21	4	15	0.84	2	55	5	40	0.916667	5	-0.0766667	1
Chr1	7043578	7043882	AluYRa1	+	55	1	44	0.982143	5	44	0	16	1	3	-0.0178571	1
Chr1	7059930	7060241	AluYRa1	+	94	13	42	0.878505	9	45	0	23	1	4	-0.121495	1
Chr1	7091379	7091688	AluYRa1	+	2	3	17	0.4	1	52	0	29	1	4	-0.6	1
Chr1	7092045	7092353	AluYRa1	+	0	1	21	0	2	31	2	46	0.939394	5	-0.939394	1
Chr1	7097285	7097586	AluYRa1	-	11	1	4	0.916667	1	34	0	14	1	3	-0.0833333	1
Chr1	7246231	7246541	AluYRa1	+	9	0	7	1	1	38	0	58	1	6	0	1
Chr1	7255934	7256240	AluYRa1	+	21	0	16	1	3	31	2	6	0.939394	3	0.0606061	1
Chr1	7331950	7332263	AluYRa1	-	17	2	35	0.894737	3	55	8	45	0.873016	6	0.021721	1
Chr1	7678740	7679044	AluYRa1	-	6	3	7	0.666667	1	0	0	0	NaN	0	NaN	1
Chr1	7803723	7804032	AluYRa1	-	60	9	54	0.869565	8	90	12	68	0.882353	11	-0.0127877	1
Chr1	7986813	7987118	AluYRa1	+	30	1	8	0.967742	3	33	1	31	0.970588	5	-0.0028463	1
Chr1	7990754	7991061	AluYRa1	-	19	0	3	1	1	71	1	82	0.986111	7	0.0138889	1
Chr1	8007276	8007600	AluYRa1	+	69	2	49	0.971831	7	97	2	45	0.979798	8	-0.00796699	1
Chr1	8104270	8104578	AluYRa1	+	51	0	25	1	4	37	0	70	1	6	0	1
Chr1	8163402	8163712	AluYRa1	-	76	0	64	1	7	36	2	25	0.947368	3	0.0526316	1
Chr1	8232676	8233001	AluYRa1	-	22	5	30	0.814815	3	20	3	53	0.869565	4	-0.0547504	1
Chr1	8294863	8295171	AluYRa1	+	18	2	29	0.9	4	42	4	59	0.913043	7	-0.0130435	1
Chr1	8352915	8353216	AluYRa1	-	35	1	16	0.972222	4	14	0	13	1	3	-0.0277778	1
Chr1	8411452	8411756	AluYRa1	-	49	4	53	0.924528	7	50	3	49	0.943396	6	-0.0188679	1
Chr1	8421425	8421733	AluYRa1	+	7	3	32	0.7	2	84	2	65	0.976744	8	-0.276744	1
Chr1	8509873	8510180	AluYRa1	+	25	2	13	0.925926	2	28	11	21	0.717949	3	0.207977	1
Chr1	8514527	8514836	AluYRa1	+	34	0	26	1	3	47	2	11	0.959184	3	0.0408163	1
Chr1	8622681	8623000	AluYRa1	+	20	0	24	1	2	45	9	34	0.833333	4	0.166667	1
Chr1	8993933	8994236	AluYRa1	-	13	2	7	0.866667	2	20	0	13	1	3	-0.133333	1
Chr1	9024189	9024490	AluYRa1	-	33	1	23	0.970588	3	50	7	55	0.877193	6	0.0933953	1
Chr1	9181745	9182054	AluYRa1	+	23	0	45	1	4	57	1	61	0.982759	7	0.0172414	1
Chr1	9353054	9353362	AluYRa1	-	42	0	64	1	5	39	11	114	0.78	8	0.22	1
Chr1	9459386	9459694	AluYRa1	+	14	1	3	0.933333	1	24	0	30	1	3	-0.0666667	1
Chr1	9535714	9536031	AluYRa1	-	59	1	20	0.983333	4	92	0	28	1	6	-0.0166667	1
Chr1	9647152	9647459	AluYRa1	-	18	2	22	0.9	2	68	7	30	0.906667	5	-0.00666667	1
Chr1	9718529	9718838	AluYRa1	+	0	0	0	NaN	0	33	1	18	0.970588	4	NaN	1
Chr1	9851342	9851648	AluYRa1	+	9	0	5	1	1	28	4	24	0.875	4	0.125	1
Chr1	10177743	10178049	AluYRa1	+	50	6	41	0.892857	5	22	5	36	0.814815	3	0.0780423	1
Chr1	10195704	10196012	AluYRa1	+	34	4	52	0.894737	6	39	4	47	0.906977	6	-0.0122399	1
Chr1	10573855	10574156	AluYRa1	-	16	0	1	1	1	28	9	14	0.756757	3	0.243243	1
Chr1	10678830	10679142	AluYRa1	-	32	0	16	1	4	31	1	16	0.96875	4	0.03125	1
Chr1	11131651	11131959	AluYRa1	+	25	3	12	0.892857	2	24	2	36	0.923077	4	-0.0302198	1
Chr1	11152289	11152592	AluYRa1	+	30	2	13	0.9375	3	42	9	84	0.823529	9	0.113971	1
Chr1	11201783	11202096	AluYRa1	+	1	1	12	0.5	1	17	0	11	1	2	-0.5	1
Chr1	11248248	11248558	AluYRa1	+	67	9	44	0.881579	6	27	2	29	0.931034	3	-0.0494555	1
Chr1	11280403	11280709	AluYRa1	-	3	2	41	0.6	2	67	9	16	0.881579	4	-0.281579	1
Chr1	11481183	11481490	AluYRa1	+	27	3	12	0.9	3	41	6	37	0.87234	6	0.0276596	1
Chr1	11522854	11523157	AluYRa1	-	61	5	60	0.924242	6	104	5	59	0.954128	8	-0.029886	1
Chr1	11545160	11545467	AluYRa1	+	44	7	54	0.862745	5	53	3	49	0.946429	5	-0.0836835	1
Chr1	11623891	11624193	AluYRa1	-	16	0	24	1	2	49	0	51	1	5	0	1
Chr1	11643917	11644220	AluYRa1	+	27	9	43	0.75	5	7	1	10	0.875	1	-0.125	1
Chr1	11784524	11784856	AluYRa1	-	7	4	19	0.636364	2	39	6	21	0.866667	4	-0.230303	1
Chr1	11842850	11843154	AluYRa1	+	16	1	19	0.941176	2	59	4	76	0.936508	8	0.00466853	1
Chr1	11898432	11898741	AluYRa1	+	44	5	23	0.897959	4	51	0	30	1	5	-0.102041	1
Chr1	11985817	11986127	AluYRa1	+	40	3	21	0.930233	4	51	1	27	0.980769	6	-0.0505367	1
Chr1	11988910	11989217	AluYRa1	+	20	2	35	0.909091	3	77	5	32	0.939024	6	-0.0299335	1
Chr1	12077647	12077952	AluYRa1	+	64	4	24	0.941176	6	51	5	63	0.910714	7	0.0304622	1
Chr1	12093402	12093713	AluYRa1	-	24	10	26	0.705882	3	99	10	64	0.908257	9	-0.202375	1
Chr1	12125399	12125700	AluYRa1	-	13	5	33	0.722222	3	16	2	16	0.888889	2	-0.166667	1
Chr1	12224760	12225069	AluYRa1	+	89	2	21	0.978022	7	85	7	53	0.923913	10	0.0541089	1
Chr1	12366828	12367133	AluYRa1	-	51	8	60	0.864407	7	43	10	32	0.811321	5	0.053086	1
Chr1	12392173	12392476	AluYRa1	-	36	1	58	0.972973	5	17	1	1	0.944444	1	0.0285285	1
Chr1	12404292	12404595	AluYRa1	-	0	0	0	NaN	0	70	3	39	0.958904	7	NaN	1
Chr1	12406203	12406524	AluYRa1	-	3	5	30	0.375	2	73	10	50	0.879518	7	-0.504518	1
Chr1	12515346	12515654	AluYRa1	-	77	3	39	0.9625	7	42	0	45	1	6	-0.0375	1
Chr1	12591180	12591485	AluYRa1	+	2	0	17	1	1	81	16	55	0.835052	8	0.164948	1
Chr1	12597143	12597451	AluYRa1	-	49	2	15	0.960784	3	59	12	17	0.830986	4	0.129798	1
Chr1	12640571	12640875	AluYRa1	+	47	3	29	0.94	8	21	2	11	0.913043	4	0.0269565	1
Chr1	12652747	12653057	AluYRa1	+	49	5	31	0.907407	5	86	5	62	0.945055	9	-0.0376475	1
Chr1	12736297	12736605	AluYRa1	-	20	1	33	0.952381	3	48	6	33	0.888889	5	0.0634921	1
Chr1	12761445	12761751	AluYRa1	+	60	2	25	0.967742	6	13	1	16	0.928571	2	0.0391705	1
Chr1	12821050	12821360	AluYRa1	+	14	0	17	1	2	44	0	32	1	5	0	1
Chr1	12834559	12834867	AluYRa1	+	15	0	13	1	2	32	7	48	0.820513	7	0.179487	1
Chr1	12868031	12868336	AluYRa1	-	8	2	17	0.8	3	4	0	5	1	1	-0.2	1
Chr1	12876556	12876859	AluYRa1	+	0	0	0	NaN	0	34	1	10	0.971429	3	NaN	1
Chr1	12908683	12908986	AluYRa1	-	0	0	0	NaN	0	10	0	11	1	1	NaN	1
Chr1	12936701	12937010	AluYRa1	-	25	6	31	0.806452	5	35	25	45	0.583333	7	0.223118	1
Chr1	12952627	12952933	AluYRa1	-	6	3	25	0.666667	2	29	1	21	0.966667	3	-0.3	1
Chr1	13007146	13007453	AluYRa1	+	18	2	12	0.9	2	9	0	7	1	1	-0.1	1
Chr1	13063737	13064042	AluYRa1	-	13	7	56	0.65	4	9	6	42	0.6	3	0.05	1
Chr1	13071213	13077328	L1_RS2	+	106	25	103	0.80916	4	56	19	80	0.746667	5	0.0624936	1
Chr1	13107431	13107740	AluYRa1	+	45	2	22	0.957447	3	10	5	8	0.666667	1	0.29078	1
Chr1	13162576	13162882	AluYRa1	-	35	3	41	0.921053	6	54	4	35	0.931034	7	-0.00998185	1
Chr1	13190264	13190573	AluYRa1	-	31	1	18	0.96875	5	41	16	33	0.719298	9	0.249452	1
Chr1	13378542	13378843	AluYRa1	+	44	1	21	0.977778	3	15	19	32	0.441176	3	0.536601	1
Chr1	13458473	13458777	AluYRa1	-	13	1	4	0.928571	2	49	5	48	0.907407	6	0.021164	1
Chr1	13510889	13511196	AluYRa1	-	68	0	28	1	6	32	0	16	1	3	0	1
Chr1	13554526	13554845	AluYRa1	-	0	0	0	NaN	0	12	4	10	0.75	2	NaN	1
Chr1	13557213	13557523	AluYRa1	+	0	0	3	NaN	1	16	0	11	1	2	NaN	1
Chr1	13562851	13563160	AluYRa1	+	0	0	3	NaN	1	61	1	14	0.983871	4	NaN	1
Chr1	13602930	13603238	AluYRa1	-	42	7	47	0.857143	6	28	3	33	0.903226	4	-0.0460829	1
Chr1	13611004	13611308	AluYRa1	-	27	1	10	0.964286	2	20	10	27	0.666667	3	0.297619	1
Chr1	13622870	13623176	AluYRa1	+	46	8	27	0.851852	4	25	5	93	0.833333	6	0.0185185	1
Chr1	13623390	13623698	AluYRa1	-	17	2	69	0.894737	4	32	5	73	0.864865	5	0.029872	1
Chr1	13636091	13636395	AluYRa1	+	22	5	49	0.814815	4	43	5	47	0.895833	5	-0.0810185	1
Chr1	13675333	13675643	AluYRa1	+	35	3	66	0.921053	7	62	4	73	0.939394	9	-0.0183413	1
Chr1	13679562	13679872	AluYRa1	-	29	5	19	0.852941	4	32	0	22	1	3	-0.147059	1
Chr1	13683890	13684194	AluYRa1	+	0	0	0	NaN	0	28	1	17	0.965517	4	NaN	1
Chr1	13691211	13691512	AluYRa1	-	27	4	22	0.870968	3	27	5	47	0.84375	4	0.0272177	1
Chr1	13692845	13693155	AluYRa1	-	23	3	23	0.884615	3	43	3	8	0.934783	3	-0.0501672	1
Chr1	13696870	13697171	AluYRa1	+	19	11	55	0.633333	5	43	7	50	0.86	5	-0.226667	1
Chr1	13704398	13704708	AluYRa1	+	18	7	35	0.72	4	19	0	26	1	3	-0.28	1
Chr1	13712429	13712737	AluYRa1	-	14	2	19	0.875	3	31	1	13	0.96875	4	-0.09375	1
Chr1	13714186	13714492	AluYRa1	-	26	5	20	0.83871	3	55	5	42	0.916667	6	-0.077957	1
Chr1	13730366	13730679	AluYRa1	-	1	7	23	0.125	3	22	1	28	0.956522	3	-0.831522	1
Chr1	13731449	13731750	AluYRa1	+	11	1	12	0.916667	2	19	3	26	0.863636	4	0.0530303	1
Chr1	13744201	13744511	AluYRa1	-	51	6	53	0.894737	5	86	6	84	0.934783	8	-0.0400458	1
Chr1	13764181	13764487	AluYRa1	+	7	2	32	0.777778	3	28	15	32	0.651163	5	0.126615	1
Chr1	13764890	13765191	AluYRa1	-	26	1	4	0.962963	2	69	16	20	0.811765	5	0.151198	1
Chr1	13766060	13766361	AluYRa1	-	4	0	13	1	2	47	3	30	0.94	5	0.06	1
Chr1	13790948	13791257	AluYRa1	+	20	2	4	0.909091	2	52	5	47	0.912281	8	-0.00318979	1
Chr1	13802480	13802789	AluYRa1	+	51	1	18	0.980769	5	34	0	27	1	4	-0.0192308	1
Chr1	13803524	13803831	AluYRa1	+	54	0	22	1	5	34	0	14	1	3	0	1
Chr1	13834449	13834750	AluYRa1	-	46	5	51	0.901961	6	62	6	51	0.911765	7	-0.00980392	1
Chr1	13857914	13858221	AluYRa1	-	69	2	20	0.971831	5	13	1	5	0.928571	1	0.0432596	1
Chr1	13926171	13926483	AluYRa1	-	22	3	63	0.88	5	60	1	65	0.983607	6	-0.103607	1
Chr1	13932952	13933254	AluYRa1	-	19	3	26	0.863636	3	16	4	12	0.8	2	0.0636364	1
Chr1	13942627	13942933	AluYRa1	-	27	2	17	0.931034	3	45	7	67	0.865385	7	0.0656499	1
Chr1	14158369	14158695	AluYRa1	-	36	6	59	0.857143	8	20	7	23	0.740741	4	0.116402	1
Chr1	14313503	14313810	AluYRa1	+	2	7	27	0.222222	2	16	6	12	0.727273	2	-0.505051	1
Chr1	14518275	14518579	AluYRa1	+	103	4	45	0.962617	8	29	2	45	0.935484	4	0.027133	1
Chr1	14547718	14548029	AluYRa1	+	11	0	8	1	1	37	6	36	0.860465	5	0.139535	1
Chr1	14592354	14592661	AluYRa1	-	24	0	27	1	3	38	3	25	0.926829	4	0.0731707	1
Chr1	14595042	14595354	AluYRa1	-	57	10	35	0.850746	6	28	0	34	1	4	-0.149254	1
Chr1	14681406	14681724	AluYRa1	-	36	4	75	0.9	5	24	8	46	0.75	4	0.15	1
Chr1	14699014	14699323	AluYRa1	+	3	0	8	1	1	27	11	38	0.710526	4	0.289474	1
Chr1	15008137	15008467	AluYRa1	+	53	3	29	0.946429	5	67	0	35	1	5	-0.0535714	1
Chr1	15069880	15070189	AluYRa1	+	58	2	20	0.966667	4	66	3	31	0.956522	5	0.0101449	1
Chr1	15105410	15105724	AluYRa1	+	5	0	21	1	2	102	9	41	0.918919	8	0.0810811	1
Chr1	15245278	15251442	L1PA5	+	48	20	28	0.705882	7	85	30	86	0.73913	13	-0.0332481	1
Chr1	15314866	15315171	AluYRa1	-	41	6	79	0.87234	6	62	1	21	0.984127	4	-0.111787	1
Chr1	15331420	15331723	AluYRa1	+	41	7	62	0.854167	6	33	3	74	0.916667	5	-0.0625	1
Chr1	15399490	15399804	AluYRa1	-	18	0	3	1	1	99	1	57	0.99	8	0.01	1
Chr1	15408346	15408660	AluYRa1	+	80	2	23	0.97561	5	77	8	46	0.905882	7	0.0697274	1
Chr1	15496740	15497045	AluYRa1	-	6	0	15	1	1	14	3	4	0.823529	1	0.176471	1
Chr1	15565883	15571963	L1PA5	+	37	6	27	0.860465	5	86	18	68	0.826923	11	0.033542	1
Chr1	15615652	15615956	AluYRa1	-	43	4	18	0.914894	5	28	8	29	0.777778	5	0.137116	1
Chr1	15642339	15642647	AluYRa1	-	32	3	33	0.914286	4	24	1	18	0.96	3	-0.0457143	1
Chr1	15718511	15718813	AluYRa1	-	55	1	7	0.982143	3	25	3	35	0.892857	3	0.0892857	1
Chr1	15740150	15740461	AluYRa1	-	35	3	19	0.921053	3	22	3	51	0.88	4	0.0410526	1
Chr1	15795219	15795524	AluYRa1	+	70	7	49	0.909091	6	55	2	27	0.964912	4	-0.0558214	1
Chr1	15906606	15906913	AluYRa1	+	27	6	27	0.818182	4	17	0	28	1	3	-0.181818	1
Chr1	15964345	15964655	AluYRa1	-	25	8	27	0.757576	4	24	3	21	0.888889	3	-0.131313	1
Chr1	15979121	15979431	AluYRa1	+	40	9	36	0.816327	5	20	0	14	1	2	-0.183673	1
Chr1	16050058	16050360	AluYRa1	-	35	18	27	0.660377	4	53	19	28	0.736111	5	-0.0757338	1
Chr1	16072908	16073217	AluYRa1	-	2	1	14	0.666667	1	27	9	15	0.75	3	-0.0833333	1
Chr1	16315894	16316211	AluYRa1	-	21	1	37	0.954545	4	67	5	36	0.930556	6	0.0239899	1
Chr1	16438458	16438771	AluYRa1	+	19	3	7	0.863636	3	5	3	25	0.625	3	0.238636	1
Chr1	16506670	16506975	AluYRa1	-	42	10	52	0.807692	7	26	4	34	0.866667	4	-0.0589744	1
Chr1	17043902	17044218	AluYRa1	-	32	3	15	0.914286	4	21	0	21	1	3	-0.0857143	1
Chr1	17047364	17047673	AluYRa1	+	34	0	18	1	5	35	2	39	0.945946	7	0.0540541	1
Chr1	17081219	17081528	AluYRa1	+	16	1	10	0.941176	3	18	1	19	0.947368	5	-0.00619195	1
Chr1	17105068	17105372	AluYRa1	+	47	1	52	0.979167	5	23	2	15	0.92	2	0.0591667	1
Chr1	17141505	17141811	AluYRa1	-	54	3	57	0.947368	6	15	15	8	0.5	2	0.447368	1
Chr1	17183875	17184186	AluYRa1	+	54	2	42	0.964286	7	50	3	44	0.943396	7	0.0208895	1
Chr1	17203955	17204283	AluYRa1	-	77	5	39	0.939024	7	67	6	27	0.917808	6	0.0212162	1
Chr1	17357752	17358064	AluYRa1	-	46	2	61	0.958333	6	63	3	60	0.954545	6	0.00378788	1
Chr1	17388080	17388386	AluYRa1	-	49	1	26	0.98	4	65	0	30	1	5	-0.02	1
Chr1	17523416	17523730	AluYRa1	-	20	1	15	0.952381	2	35	2	32	0.945946	4	0.00643501	1
Chr1	17750547	17750849	AluYRa1	-	13	0	6	1	1	26	9	41	0.742857	4	0.257143	1
Chr1	17793733	17794042	AluYRa1	+	33	0	24	1	4	65	8	87	0.890411	10	0.109589	1
Chr1	17897603	17897908	AluYRa1	-	78	1	36	0.987342	5	82	0	71	1	7	-0.0126582	1
Chr1	17963441	17963745	AluYRa1	+	5	5	35	0.5	3	60	10	32	0.857143	6	-0.357143	1
Chr1	18112571	18112880	AluYRa1	-	30	4	29	0.882353	3	37	2	45	0.948718	4	-0.066365	1
Chr1	18176956	18177266	AluYRa1	+	17	0	43	1	5	47	5	27	0.903846	7	0.0961538	1
Chr1	18390470	18390802	AluYRa1	-	54	7	35	0.885246	6	61	4	36	0.938462	7	-0.0532156	1
Chr1	18409549	18409851	AluYRa1	-	27	0	15	1	2	1	0	20	1	1	0	1
Chr1	18793125	18793434	AluYRa1	+	64	4	40	0.941176	6	57	3	30	0.95	5	-0.00882353	1
Chr1	18831323	18831631	AluYRa1	+	77	5	35	0.939024	6	67	8	45	0.893333	6	0.0456911	1
Chr1	18976846	18977148	AluYRa1	-	51	4	54	0.927273	7	67	16	88	0.807229	9	0.120044	1
Chr1	19099888	19100196	AluYRa1	-	21	2	11	0.913043	2	48	4	50	0.923077	6	-0.0100334	1
Chr1	19184528	19184835	AluYRa1	+	51	4	20	0.927273	5	24	1	5	0.96	2	-0.0327273	1
Chr1	19277907	19278209	AluYRa1	-	43	6	41	0.877551	5	56	3	3	0.949153	4	-0.0716015	1
Chr1	19311558	19311863	AluYRa1	-	40	1	21	0.97561	5	11	2	0	0.846154	1	0.129456	1
Chr1	19315313	19315620	AluYRa1	+	20	9	26	0.689655	4	0	0	0	NaN	0	NaN	1
Chr1	19342420	19342730	AluYRa1	+	21	1	16	0.954545	2	34	4	44	0.894737	5	0.0598086	1
Chr1	19382435	19382744	AluYRa1	+	48	3	44	0.941176	5	60	3	57	0.952381	6	-0.0112045	1
Chr1	19382951	19383258	AluYRa1	+	17	3	48	0.85	4	29	3	56	0.90625	6	-0.05625	1
Chr1	19387788	19388096	AluYRa1	+	30	7	31	0.810811	5	23	3	58	0.884615	6	-0.0738046	1
Chr1	19445099	19445405	AluYRa1	-	5	3	8	0.625	1	15	1	46	0.9375	4	-0.3125	1
Chr1	19477727	19478028	AluYRa1	+	42	6	42	0.875	5	0	1	17	0	1	0.875	1
Chr1	19482963	19483272	AluYRa1	+	55	2	28	0.964912	5	8	0	9	1	1	-0.0350877	1
Chr1	19527737	19528073	AluYRa1	-	24	0	12	1	2	75	0	69	1	8	0	1
Chr1	19538368	19538673	AluYRa1	+	43	0	33	1	4	17	0	2	1	1	0	1
Chr1	19581235	19581543	AluYRa1	+	78	9	84	0.896552	9	49	6	58	0.890909	7	0.00564263	1
Chr1	19615428	19615754	AluYRa1	+	10	0	23	1	3	61	4	47	0.938462	7	0.0615385	1
Chr1	19668261	19668567	AluYRa1	-	14	8	35	0.636364	3	15	1	6	0.9375	2	-0.301136	1
Chr1	19720605	19720921	AluYRa1	+	13	2	2	0.866667	1	0	0	0	NaN	0	NaN	1
Chr1	19931672	19932010	AluYRa1	-	21	8	19	0.724138	4	43	5	36	0.895833	7	-0.171695	1
Chr1	20071145	20071449	AluYRa1	-	40	3	14	0.930233	3	8	0	23	1	2	-0.0697674	1
Chr1	20168020	20168327	AluYRa1	-	34	2	21	0.944444	3	12	1	25	0.923077	2	0.0213675	1
Chr1	20278665	20278967	AluYRa1	-	28	3	32	0.903226	3	56	12	33	0.823529	5	0.0796964	1
Chr1	20424932	20425242	AluYRa1	-	33	1	46	0.970588	5	47	0	36	1	6	-0.0294118	1
Chr1	20590235	20590554	AluYRa1	+	21	2	28	0.913043	3	38	0	30	1	4	-0.0869565	1
Chr1	20619329	20619635	AluYRa1	-	20	3	15	0.869565	2	39	0	18	1	3	-0.130435	1
Chr1	20641058	20641363	AluYRa1	+	57	1	18	0.982759	4	68	6	59	0.918919	7	0.0638397	1
Chr1	20932507	20932812	AluYRa1	-	9	2	32	0.818182	3	32	4	47	0.888889	5	-0.0707071	1
Chr1	20965393	20971537	L1_RS2	-	124	23	87	0.843537	6	38	1	45	0.974359	2	-0.130822	1
Chr1	21220511	21220817	AluYRa1	+	85	2	23	0.977011	5	70	0	40	1	5	-0.0229885	1
Chr1	21610431	21610733	AluYRa1	-	0	0	0	NaN	0	24	7	47	0.774194	6	NaN	1
Chr1	21656577	21662728	L1_RS2	+	198	35	160	0.849785	7	47	13	40	0.783333	2	0.0664521	1
Chr1	21778837	21779143	AluYRa1	+	67	5	64	0.930556	8	20	0	14	1	2	-0.0694444	1
Chr1	21935441	21935743	AluYRa1	-	64	1	15	0.984615	4	78	10	98	0.886364	10	0.0982517	1
Chr1	21940279	21940588	AluYRa1	-	58	11	61	0.84058	7	29	0	31	1	3	-0.15942	1
Chr1	21980108	21980422	AluYRa1	+	45	2	21	0.957447	4	30	0	10	1	3	-0.0425532	1
Chr1	22026136	22026443	AluYRa1	-	22	4	34	0.846154	5	47	1	42	0.979167	5	-0.133013	1
Chr1	22051953	22052256	AluYRa1	+	47	11	82	0.810345	7	33	0	27	1	3	-0.189655	1
Chr1	22087388	22087697	AluYRa1	-	11	1	60	0.916667	4	69	7	34	0.907895	7	0.00877193	1
Chr1	22094772	22095079	AluYRa1	-	17	4	30	0.809524	3	12	8	48	0.6	4	0.209524	1
Chr1	22097819	22098132	AluYRa1	-	23	0	17	1	2	64	11	45	0.853333	6	0.146667	1
Chr1	22106905	22107206	AluYRa1	-	25	3	26	0.892857	6	11	0	7	1	2	-0.107143	1
Chr1	22391914	22392224	AluYRa1	-	72	0	12	1	4	61	8	36	0.884058	5	0.115942	1
Chr1	22421447	22421757	AluYRa1	+	0	0	0	NaN	0	80	4	38	0.952381	9	NaN	1
Chr1	22579715	22585837	L1PA5	-	71	23	99	0.755319	13	49	51	71	0.49	10	0.265319	0.107195
Chr1	22858842	22859153	AluYRa1	-	68	6	70	0.918919	7	77	11	65	0.875	8	0.0439189	1
Chr1	23085183	23085499	AluYRa1	+	88	0	17	1	5	65	1	39	0.984848	5	0.0151515	1
Chr1	23098280	23098582	AluYRa1	-	19	0	29	1	3	32	0	32	1	4	0	1
Chr1	23151888	23152198	AluYRa1	+	23	2	14	0.92	3	5	1	7	0.833333	1	0.0866667	1
Chr1	23173535	23173838	AluYRa1	-	4	3	7	0.571429	1	52	16	44	0.764706	8	-0.193277	1
Chr1	23183386	23183689	AluYRa1	+	39	0	15	1	3	25	10	37	0.714286	4	0.285714	1
Chr1	23201929	23202241	AluYRa1	-	3	1	13	0.75	1	13	0	4	1	1	-0.25	1
Chr1	23203278	23203623	AluYRa1	+	20	6	4	0.769231	2	31	13	21	0.704545	4	0.0646853	1
Chr1	23241878	23242186	AluYRa1	+	22	0	44	1	3	75	4	61	0.949367	7	0.0506329	1
Chr1	23283257	23283559	AluYRa1	+	27	0	17	1	2	68	2	40	0.971429	5	0.0285714	1
Chr1	23290649	23290957	AluYRa1	+	55	1	23	0.982143	5	33	1	4	0.970588	2	0.0115546	1
Chr1	23306980	23307289	AluYRa1	+	20	9	55	0.689655	4	51	0	33	1	4	-0.310345	1
Chr1	23343955	23344257	AluYRa1	+	9	0	13	1	1	70	5	57	0.933333	6	0.0666667	1
Chr1	23456894	23463059	L1PA5	+	51	18	25	0.73913	5	82	40	99	0.672131	13	0.0669993	1
Chr1	23531659	23531968	AluYRa1	+	17	0	11	1	2	17	2	23	0.894737	3	0.105263	1
Chr1	23745511	23745818	AluYRa1	+	63	9	65	0.875	7	44	4	85	0.916667	7	-0.0416667	1
Chr1	23779272	23779583	AluYRa1	-	55	2	19	0.964912	4	18	0	39	1	3	-0.0350877	1
Chr1	23892300	23898475	L1_RS2	-	41	8	89	0.836735	4	126	25	65	0.834437	5	0.00229761	1
Chr1	23959622	23959927	AluYRa1	+	0	15	3	0	1	47	10	33	0.824561	5	-0.824561	1
Chr1	24010479	24016639	L1_RS2	+	100	16	70	0.862069	6	181	64	170	0.738776	12	0.123293	1
Chr1	24247051	24247366	AluYRa1	-	33	0	30	1	3	80	5	47	0.941176	6	0.0588235	1
Chr1	24370652	24370957	AluYRa1	-	0	0	0	NaN	0	62	7	71	0.898551	7	NaN	1
Chr1	24586693	24587002	AluYRa1	-	20	0	16	1	2	80	2	26	0.97561	6	0.0243902	1
Chr1	24619097	24619410	AluYRa1	+	50	1	54	0.980392	5	42	1	41	0.976744	4	0.00364797	1
Chr1	24622954	24623260	AluYRa1	+	36	2	42	0.947368	4	18	1	21	0.947368	2	0	1
Chr1	24734049	24734356	AluYRa1	+	59	8	53	0.880597	6	15	0	29	1	3	-0.119403	1
Chr1	24771119	24771427	AluYRa1	-	5	1	13	0.833333	1	57	1	37	0.982759	5	-0.149425	1
Chr1	24812556	24812867	AluYRa1	+	22	0	10	1	2	1	5	10	0.166667	1	0.833333	1
Chr1	24828341	24828644	AluYRa1	-	30	5	25	0.857143	4	37	13	14	0.74	5	0.117143	1
Chr1	24986910	24987218	AluYRa1	+	98	7	66	0.933333	9	39	8	29	0.829787	4	0.103546	1
Chr1	25157437	25157750	AluYRa1	+	17	7	24	0.708333	3	17	0	21	1	4	-0.291667	1
Chr1	25167100	25167402	AluYRa1	+	15	1	2	0.9375	1	24	0	12	1	2	-0.0625	1
Chr1	25197530	25197834	AluYRa1	+	49	7	40	0.875	6	49	5	26	0.907407	5	-0.0324074	1
Chr1	25199190	25199500	AluYRa1	-	52	1	37	0.981132	6	32	1	12	0.969697	3	0.0114351	1
Chr1	25209607	25209920	AluYRa1	-	43	8	54	0.843137	5	58	4	43	0.935484	5	-0.0923466	1
Chr1	25223460	25223772	AluYRa1	-	50	5	29	0.909091	5	43	2	31	0.955556	4	-0.0464646	1
Chr1	25276199	25276502	AluYRa1	-	18	6	33	0.75	3	18	4	54	0.818182	4	-0.0681818	1
Chr1	25356958	25357262	AluYRa1	+	31	1	68	0.96875	5	40	4	56	0.909091	5	0.0596591	1
Chr1	25361306	25361610	AluYRa1	-	54	0	39	1	6	108	12	48	0.9	10	0.1	1
Chr1	25659939	25660258	AluYRa1	-	62	7	63	0.898551	7	24	15	32	0.615385	4	0.283166	1
Chr1	25997355	25997662	AluYRa1	+	11	0	11	1	1	35	0	43	1	4	0	1
Chr1	26098215	26104359	L1_RS2	+	95	18	85	0.840708	7	136	29	106	0.824242	8	0.0164655	1
Chr1	26172043	26172352	AluYRa1	+	28	2	27	0.933333	3	55	2	60	0.964912	7	-0.0315789	1
Chr1	26756260	26756580	AluYRa1	+	22	1	15	0.956522	2	34	0	42	1	4	-0.0434783	1
Chr1	27043724	27044037	AluYRa1	-	37	3	20	0.925	3	139	6	86	0.958621	11	-0.0336207	1
Chr1	27532821	27533141	AluYRa1	-	66	6	56	0.916667	8	39	0	18	1	3	-0.0833333	1
Chr1	27608874	27615029	L1_RS2	-	88	21	95	0.807339	5	129	49	81	0.724719	10	0.0826203	1
Chr1	27784730	27785039	AluYRa1	+	16	0	13	1	2	46	6	38	0.884615	6	0.115385	1
Chr1	27959637	27959938	AluYRa1	-	30	1	3	0.967742	2	62	3	29	0.953846	6	0.0138958	1
Chr1	28064998	28065321	AluYRa1	+	99	4	51	0.961165	7	66	4	84	0.942857	7	0.0183079	1
Chr1	28122391	28128564	L1PA5	+	99	29	98	0.773438	16	70	34	46	0.673077	10	0.100361	1
Chr1	28312476	28318625	L1_RS2	-	287	52	131	0.846608	13	153	31	107	0.831522	8	0.0150859	1
Chr1	28338070	28338372	AluYRa1	+	24	5	15	0.827586	4	15	6	4	0.714286	3	0.1133	1
Chr1	28341509	28341838	AluYRa1	+	16	0	24	1	2	52	7	1	0.881356	3	0.118644	1
Chr1	28715292	28715594	AluYRa1	+	59	15	28	0.797297	6	46	5	34	0.901961	5	-0.104663	1
Chr1	28720255	28720558	AluYRa1	-	2	0	6	1	1	49	2	22	0.960784	4	0.0392157	1
Chr1	28732594	28738746	L1_RS2	+	90	4	58	0.957447	4	122	23	105	0.841379	6	0.116067	1
Chr1	28807722	28808026	AluYRa1	+	62	2	31	0.96875	5	52	2	22	0.962963	4	0.00578704	1
Chr1	29041658	29041964	AluYRa1	-	46	1	35	0.978723	4	105	8	41	0.929204	7	0.0495199	1
Chr1	29083672	29083973	AluYRa1	-	23	1	30	0.958333	3	66	6	54	0.916667	7	0.0416667	1
Chr1	29106102	29106410	AluYRa1	-	26	3	47	0.896552	4	25	15	55	0.625	5	0.271552	1
Chr1	29200390	29200700	AluYRa1	+	57	6	13	0.904762	4	101	7	27	0.935185	8	-0.0304233	1
Chr1	29218447	29218751	AluYRa1	+	44	12	35	0.785714	7	49	2	40	0.960784	7	-0.17507	1
Chr1	29340255	29340573	AluYRa1	-	52	4	28	0.928571	4	77	2	26	0.974684	5	-0.0461121	1
Chr1	29356054	29356359	AluYRa1	+	36	1	3	0.972973	2	71	3	46	0.959459	6	0.0135135	1
Chr1	29374632	29374941	AluYRa1	-	13	1	46	0.928571	3	70	2	45	0.972222	6	-0.0436508	1
Chr1	29458140	29458443	AluYRa1	+	31	2	22	0.939394	4	34	0	17	1	3	-0.0606061	1
Chr1	29472899	29479026	L1_RS2	+	35	18	38	0.660377	4	206	81	171	0.71777	12	-0.0573927	1
Chr1	29548941	29549257	AluYRa1	+	46	0	11	1	3	33	1	23	0.970588	3	0.0294118	1
Chr1	29562242	29562554	AluYRa1	-	10	0	3	1	1	58	3	17	0.95082	6	0.0491803	1
Chr1	29603719	29609793	L1PA5	+	53	5	72	0.913793	8	33	8	43	0.804878	4	0.108915	1
Chr1	29729196	29735334	L1PA5	+	98	25	89	0.796748	9	131	31	97	0.808642	9	-0.011894	1
Chr1	29762183	29762492	AluYRa1	+	64	4	69	0.941176	7	43	8	82	0.843137	8	0.0980392	1
Chr1	29797078	29803355	L1_RS2	+	68	22	84	0.755556	11	275	48	230	0.851393	13	-0.0958376	1
Chr1	30004460	30004769	AluYRa1	+	35	2	63	0.945946	5	22	0	18	1	2	-0.0540541	1
Chr1	30269743	30270050	AluYRa1	+	84	2	82	0.976744	8	92	3	72	0.968421	8	0.00832313	1
Chr1	30320784	30321090	AluYRa1	+	16	2	14	0.888889	2	55	11	9	0.833333	5	0.0555556	1
Chr1	30395839	30401986	L1_RS2	-	146	30	148	0.829545	10	173	38	209	0.819905	15	0.00964024	1
Chr1	30468161	30474304	L1_RS2	-	394	36	216	0.916279	17	241	30	157	0.889299	10	0.0269802	1
Chr1	30502427	30502734	AluYRa1	+	90	7	55	0.927835	8	77	0	18	1	5	-0.0721649	1
Chr1	30516738	30517046	AluYRa1	+	29	0	13	1	2	28	1	34	0.965517	3	0.0344828	1
Chr1	30584466	30584784	AluYRa1	-	37	2	21	0.948718	3	24	10	26	0.705882	3	0.242836	1
Chr1	30585318	30585634	AluYRa1	+	20	6	28	0.769231	3	24	12	18	0.666667	3	0.102564	1
Chr1	30701904	30702211	AluYRa1	+	22	1	33	0.956522	4	29	5	22	0.852941	4	0.103581	1
Chr1	30750785	30751093	AluYRa1	-	36	4	25	0.9	5	38	3	24	0.926829	5	-0.0268293	1
Chr1	30934252	30934557	AluYRa1	-	16	8	41	0.666667	5	55	15	71	0.785714	9	-0.119048	1
Chr1	30983924	30984232	AluYRa1	+	17	1	21	0.944444	3	42	20	19	0.677419	7	0.267025	1
Chr1	30997576	30997878	AluYRa1	-	20	0	16	1	3	38	1	21	0.974359	5	0.025641	1
Chr1	31027065	31027371	AluYRa1	-	65	1	34	0.984848	5	14	0	26	1	2	-0.0151515	1
Chr1	31059143	31059513	MacERV1_LTR4	-	0	0	8	NaN	1	23	2	19	0.92	5	NaN	1
Chr1	31066283	31066653	MacERV1_LTR4	-	17	0	10	1	3	12	0	15	1	3	0	1
Chr1	31066850	31067157	AluYRa1	+	49	2	37	0.960784	4	20	0	46	1	3	-0.0392157	1
Chr1	31124996	31125301	AluYRa1	-	24	0	14	1	3	19	1	16	0.95	2	0.05	1
Chr1	31150191	31150507	AluYRa1	-	33	2	70	0.942857	5	71	2	62	0.972603	7	-0.0297456	1
Chr1	31179442	31179747	AluYRa1	-	26	0	22	1	3	65	18	58	0.783133	9	0.216867	1
Chr1	31182117	31182419	AluYRa1	+	11	1	5	0.916667	1	56	7	73	0.888889	8	0.0277778	1
Chr1	31267540	31267853	AluYRa1	-	0	0	20	NaN	1	29	3	28	0.90625	3	NaN	1
Chr1	31275296	31275611	AluYRa1	+	48	0	20	1	4	15	1	7	0.9375	2	0.0625	1
Chr1	31288340	31288649	AluYRa1	+	55	5	66	0.916667	6	9	0	12	1	1	-0.0833333	1
Chr1	31313679	31313981	AluYRa1	+	14	3	17	0.823529	2	54	2	46	0.964286	6	-0.140756	1
Chr1	31401896	31402208	AluYRa1	-	46	1	21	0.978723	4	39	3	26	0.928571	4	0.050152	1
Chr1	31441846	31442155	AluYRa1	-	70	3	32	0.958904	5	45	6	12	0.882353	3	0.0765512	1
Chr1	31455011	31455317	AluYRa1	-	33	4	39	0.891892	4	50	1	63	0.980392	6	-0.0885003	1
Chr1	31475794	31476097	AluYRa1	-	17	0	1	1	1	22	3	65	0.88	5	0.12	1
Chr1	31528602	31528904	AluYRa1	-	0	3	14	0	1	53	11	38	0.828125	6	-0.828125	1
Chr1	31798411	31798718	AluYRa1	-	22	0	22	1	2	11	0	28	1	2	0	1
Chr1	31879199	31885338	L1_RS2	-	214	32	104	0.869919	7	133	49	164	0.730769	10	0.139149	0.834617
Chr1	31895220	31895526	AluYRa1	+	36	1	35	0.972973	4	26	1	9	0.962963	2	0.01001	1
Chr1	31929136	31929438	AluYRa1	-	29	8	33	0.783784	4	17	0	37	1	3	-0.216216	1
Chr1	31964605	31964907	AluYRa1	+	26	10	24	0.722222	4	41	13	51	0.759259	7	-0.037037	1
Chr1	32008638	32014779	L1_RS2	+	117	38	147	0.754839	10	195	25	96	0.886364	8	-0.131525	1
Chr1	32044158	32044471	AluYRa1	+	13	3	32	0.8125	3	29	6	29	0.828571	4	-0.0160714	1
Chr1	32100865	32101166	AluYRa1	-	47	0	38	1	5	49	1	35	0.98	5	0.02	1
Chr1	32102585	32102892	AluYRa1	+	63	2	11	0.969231	4	38	0	21	1	4	-0.0307692	1
Chr1	32111515	32111822	AluYRa1	+	17	1	24	0.944444	3	23	0	19	1	3	-0.0555556	1
Chr1	32122813	32123116	AluYRa1	+	30	1	41	0.967742	4	20	6	46	0.769231	4	0.198511	1
Chr1	32145588	32145896	AluYRa1	-	38	3	61	0.926829	6	43	4	47	0.914894	6	0.0119357	1
Chr1	32187507	32187815	AluYRa1	+	22	2	76	0.916667	5	41	0	22	1	4	-0.0833333	1
Chr1	32189357	32189676	AluYRa1	-	37	6	25	0.860465	6	34	2	20	0.944444	4	-0.0839793	1
Chr1	32212186	32212497	AluYRa1	-	5	2	14	0.714286	1	39	1	44	0.975	4	-0.260714	1
Chr1	32272539	32272841	AluYRa1	+	46	0	20	1	6	18	12	40	0.6	7	0.4	0.126243
Chr1	32942298	32948408	L1_RS2	-	76	14	76	0.844444	6	111	47	140	0.702532	8	0.141913	1
Chr1	33108470	33108777	AluYRa1	+	17	1	42	0.944444	4	51	26	43	0.662338	8	0.282107	1
Chr1	33220570	33220882	AluYRa1	+	31	4	12	0.885714	3	90	2	60	0.978261	8	-0.0925466	1
Chr1	33443056	33443358	AluYRa1	+	26	15	39	0.634146	4	48	5	27	0.90566	4	-0.271514	1
Chr1	33460369	33460680	AluYRa1	+	30	2	34	0.9375	3	28	9	51	0.756757	4	0.180743	1
Chr1	33491058	33491361	AluYRa1	-	25	2	15	0.925926	3	15	2	25	0.882353	3	0.043573	1
Chr1	33577225	33577538	AluYRa1	+	33	14	69	0.702128	8	43	1	44	0.977273	6	-0.275145	1
Chr1	33734697	33735004	AluYRa1	+	36	4	14	0.9	3	23	5	44	0.821429	4	0.0785714	1
Chr1	33875258	33875563	AluYRa1	-	44	3	29	0.93617	4	77	4	62	0.950617	8	-0.0144471	1
Chr1	33894522	33894832	AluYRa1	+	40	1	37	0.97561	6	59	3	29	0.951613	7	0.0239969	1
Chr1	33901535	33901836	AluYRa1	+	28	4	65	0.875	6	63	3	102	0.954545	8	-0.0795455	1
Chr1	33985166	33991294	L1_RS2	+	141	25	118	0.849398	6	191	71	130	0.729008	10	0.12039	1
Chr1	34209759	34210070	AluYRa1	-	0	0	0	NaN	0	67	0	9	1	4	NaN	1
Chr1	34627409	34627717	AluYRa1	+	25	1	10	0.961538	2	61	2	57	0.968254	7	-0.00671551	1
Chr1	34692619	34692923	AluYRa1	+	82	1	37	0.987952	6	45	3	32	0.9375	4	0.0504518	1
Chr1	34761008	34761317	AluYRa1	+	33	0	15	1	3	67	3	42	0.957143	7	0.0428571	1
Chr1	35130787	35131091	AluYRa1	+	44	8	46	0.846154	7	32	2	44	0.941176	6	-0.0950226	1
Chr1	35186244	35186579	AluYRa1	-	39	5	13	0.886364	3	5	2	12	0.714286	1	0.172078	1
Chr1	35318479	35318785	AluYRa1	+	6	1	13	0.857143	1	72	3	76	0.96	8	-0.102857	1
Chr1	35321150	35321462	AluYRa1	+	19	0	33	1	4	49	2	41	0.960784	8	0.0392157	1
Chr1	35455241	35455543	AluYRa1	-	26	7	35	0.787879	4	38	2	15	0.95	5	-0.162121	1
Chr1	35483153	35483461	AluYRa1	+	43	9	55	0.826923	9	26	0	29	1	5	-0.173077	1
Chr1	35638167	35638475	AluYRa1	+	50	12	27	0.806452	5	67	1	8	0.985294	4	-0.178843	1
Chr1	35838868	35839183	AluYRa1	-	28	0	10	1	2	17	0	2	1	1	0	1
Chr1	35850319	35850633	AluYRa1	-	46	4	14	0.92	4	78	6	24	0.928571	6	-0.00857143	1
Chr1	35855020	35855325	AluYRa1	+	38	3	29	0.926829	5	19	1	36	0.95	4	-0.0231707	1
Chr1	35957749	35958059	AluYRa1	-	36	3	33	0.923077	4	92	1	69	0.989247	9	-0.0661704	1
Chr1	36090465	36090776	AluYRa1	+	35	2	23	0.945946	4	29	1	31	0.966667	5	-0.0207207	1
Chr1	36117860	36118167	AluYRa1	+	42	2	16	0.954545	3	0	0	0	NaN	0	NaN	1
Chr1	36200559	36200865	AluYRa1	+	46	4	26	0.92	4	55	3	37	0.948276	5	-0.0282759	1
Chr1	36384285	36384586	AluYRa1	+	20	2	20	0.909091	2	43	2	18	0.955556	3	-0.0464646	1
Chr1	36451361	36451671	AluYRa1	+	67	1	22	0.985294	6	57	1	32	0.982759	6	0.0025355	1
Chr1	36467230	36467539	AluYRa1	-	20	1	33	0.952381	3	63	0	31	1	6	-0.047619	1
Chr1	36510211	36510518	AluYRa1	-	11	0	31	1	2	27	1	48	0.964286	5	0.0357143	1
Chr1	36520403	36520711	AluYRa1	+	32	0	17	1	4	46	0	44	1	6	0	1
Chr1	36524087	36524388	AluYRa1	+	42	2	28	0.954545	4	33	4	35	0.891892	4	0.0626536	1
Chr1	36550027	36550330	AluYRa1	-	23	1	14	0.958333	2	75	1	42	0.986842	7	-0.0285088	1
Chr1	36575266	36575576	AluYRa1	+	64	1	30	0.984615	5	25	0	32	1	3	-0.0153846	1
Chr1	36576414	36576715	AluYRa1	+	43	4	25	0.914894	6	11	4	33	0.733333	4	0.18156	1
Chr1	36596562	36596865	AluYRa1	-	27	2	40	0.931034	5	13	3	18	0.8125	2	0.118534	1
Chr1	36622266	36628410	L1_RS2	-	93	10	55	0.902913	3	29	12	37	0.707317	4	0.195596	1
Chr1	36698948	36699258	AluYRa1	+	36	0	44	1	5	13	0	3	1	1	0	1
Chr1	36731518	36731829	AluYRa1	-	21	1	23	0.954545	3	57	1	32	0.982759	6	-0.0282132	1
Chr1	36746160	36752423	L1PA5	-	96	18	53	0.842105	12	90	21	93	0.810811	15	0.0312945	1
Chr1	36777858	36783958	L1PA5	-	101	39	85	0.721429	18	28	18	32	0.608696	6	0.112733	1
Chr1	36839764	36840065	AluYRa1	+	46	19	78	0.707692	8	69	9	55	0.884615	7	-0.176923	1
Chr1	37077708	37078013	AluYRa1	-	15	1	0	0.9375	1	28	4	30	0.875	4	0.0625	1
Chr1	37087685	37087995	AluYRa1	-	26	17	20	0.604651	3	42	2	19	0.954545	3	-0.349894	1
Chr1	37092439	37092741	AluYRa1	+	53	8	42	0.868852	5	19	4	21	0.826087	2	0.0427655	1
Chr1	37124156	37124463	AluYRa1	+	25	1	25	0.961538	3	20	2	60	0.909091	5	0.0524476	1
Chr1	37140149	37140453	AluYRa1	-	59	0	29	1	4	39	1	11	0.975	3	0.025	1
Chr1	37141489	37141798	AluYRa1	+	79	0	26	1	5	25	1	16	0.961538	2	0.0384615	1
Chr1	37186143	37186448	AluYRa1	-	33	1	8	0.970588	2	42	0	17	1	3	-0.0294118	1
Chr1	37186683	37186993	AluYRa1	+	10	0	8	1	1	21	2	31	0.913043	3	0.0869565	1
Chr1	37205115	37205418	AluYRa1	+	33	1	34	0.970588	4	21	1	12	0.954545	2	0.0160428	1
Chr1	37211402	37211705	AluYRa1	-	24	2	19	0.923077	3	39	4	47	0.906977	6	0.0161002	1
Chr1	37224368	37224678	AluYRa1	+	18	1	11	0.947368	2	36	0	24	1	4	-0.0526316	1
Chr1	37243756	37244057	AluYRa1	-	22	9	20	0.709677	3	71	3	45	0.959459	7	-0.249782	1
Chr1	37310335	37310643	AluYRa1	+	55	6	34	0.901639	5	98	1	85	0.989899	8	-0.0882596	1
Chr1	37329930	37330244	AluYRa1	+	15	1	20	0.9375	2	49	2	39	0.960784	5	-0.0232843	1
Chr1	37347981	37348290	AluYRa1	+	18	3	15	0.857143	2	56	14	56	0.8	7	0.0571429	1
Chr1	37362461	37362767	AluYRa1	-	51	4	55	0.927273	5	38	7	43	0.844444	4	0.0828283	1
Chr1	37367004	37367307	AluYRa1	+	20	2	12	0.909091	2	64	4	34	0.941176	6	-0.0320856	1
Chr1	37379858	37380211	AluYRa1	-	15	0	21	1	3	10	11	49	0.47619	5	0.52381	1
Chr1	37411977	37412278	AluYRa1	+	63	3	18	0.954545	6	27	2	15	0.931034	4	0.023511	1
Chr1	37496339	37496652	AluYRa1	+	10	0	10	1	1	34	2	44	0.944444	4	0.0555556	1
Chr1	37532620	37532933	AluYRa1	+	20	1	11	0.952381	2	60	4	62	0.9375	8	0.014881	1
Chr1	37588053	37588357	AluYRa1	+	47	8	30	0.854545	5	88	5	43	0.946237	8	-0.0916911	1
Chr1	37604492	37604802	AluYRa1	+	10	0	16	1	2	40	1	11	0.97561	5	0.0243902	1
Chr1	37647144	37647452	AluYRa1	-	28	0	36	1	4	42	1	37	0.976744	5	0.0232558	1
Chr1	37665232	37665536	AluYRa1	+	80	0	22	1	6	87	6	76	0.935484	10	0.0645161	1
Chr1	37666127	37666439	AluYRa1	-	30	0	4	1	2	102	4	63	0.962264	10	0.0377358	1
Chr1	37671046	37671354	AluYRa1	-	16	0	16	1	2	74	13	63	0.850575	10	0.149425	1
Chr1	37682640	37682946	AluYRa1	+	73	2	33	0.973333	5	38	5	67	0.883721	5	0.0896124	1
Chr1	37716703	37717012	AluYRa1	+	65	2	39	0.970149	6	62	5	47	0.925373	8	0.0447761	1
Chr1	37719855	37720166	AluYRa1	+	0	0	3	NaN	1	13	0	38	1	3	NaN	1
Chr1	37727649	37727961	AluYRa1	-	62	3	45	0.953846	5	43	1	44	0.977273	4	-0.0234266	1
Chr1	37727974	37728281	AluYRa1	-	55	4	36	0.932203	5	48	3	25	0.941176	4	-0.00897308	1
Chr1	37845054	37845358	AluYRa1	-	22	7	32	0.758621	4	12	0	20	1	2	-0.241379	1
Chr1	37847155	37847459	AluYRa1	-	35	6	25	0.853659	3	12	0	32	1	2	-0.146341	1
Chr1	37861233	37861539	AluYRa1	-	24	6	23	0.8	3	22	0	18	1	2	-0.2	1
Chr1	37882826	37883138	AluYRa1	+	37	1	22	0.973684	3	53	0	27	1	4	-0.0263158	1
Chr1	37994076	37994384	AluYRa1	-	9	6	17	0.6	2	36	0	10	1	3	-0.4	1
Chr1	38057879	38058183	AluYRa1	-	17	2	13	0.894737	2	69	7	36	0.907895	7	-0.0131579	1
Chr1	38287097	38287405	AluYRa1	-	2	1	18	0.666667	1	21	1	20	0.954545	2	-0.287879	1
Chr1	38412252	38412556	AluYRa1	+	4	0	15	1	1	12	1	6	0.923077	1	0.0769231	1
Chr1	38413690	38419779	L1PA5	+	76	15	51	0.835165	8	103	23	96	0.81746	14	0.0177045	1
Chr1	38479921	38486050	L1PA5	-	82	33	72	0.713043	8	120	83	138	0.591133	17	0.12191	1
Chr1	38880662	38880967	AluYRa1	-	5	0	15	1	1	13	0	7	1	1	0	1
Chr1	39038870	39039176	AluYRa1	-	67	2	36	0.971014	7	81	4	20	0.952941	7	0.0180733	1
Chr1	39160502	39160813	AluYRa1	-	46	0	14	1	3	6	0	26	1	2	0	1
Chr1	39641643	39641961	AluYRa1	-	11	0	7	1	1	32	0	22	1	3	0	1
Chr1	39675936	39676240	AluYRa1	+	32	0	31	1	3	25	0	17	1	2	0	1
Chr1	39857403	39857719	AluYRa1	-	18	18	15	0.5	3	5	34	27	0.128205	4	0.371795	1
Chr1	39998912	39999221	AluYRa1	-	31	2	8	0.939394	3	33	1	21	0.970588	3	-0.0311943	1
Chr1	40114179	40114487	AluYRa1	+	21	3	36	0.875	3	76	3	41	0.962025	6	-0.0870253	1
Chr1	40115366	40115681	AluYRa1	-	29	1	30	0.966667	3	82	3	35	0.964706	6	0.00196079	1
Chr1	40121940	40122253	AluYRa1	-	43	2	55	0.955556	5	115	4	81	0.966387	10	-0.010831	1
Chr1	40144200	40144504	AluYRa1	+	153	3	70	0.980769	12	24	1	15	0.96	2	0.0207692	1
Chr1	40186963	40187274	AluYRa1	-	46	4	38	0.92	4	71	6	55	0.922078	6	-0.00207792	1
Chr1	40235344	40235654	AluYRa1	+	37	2	37	0.948718	4	35	0	3	1	2	-0.0512821	1
Chr1	40285753	40286058	AluYRa1	-	33	3	56	0.916667	4	50	2	37	0.961538	4	-0.0448718	1
Chr1	40381406	40381707	AluYRa1	+	6	0	7	1	1	25	2	38	0.925926	5	0.0740741	1
Chr1	40459305	40459618	AluYRa1	-	27	1	14	0.964286	3	22	3	17	0.88	3	0.0842857	1
Chr1	40613038	40613348	AluYRa1	+	33	1	26	0.970588	4	33	2	22	0.942857	3	0.0277311	1
Chr1	40674322	40674630	AluYRa1	+	47	5	39	0.903846	5	65	12	45	0.844156	7	0.0596903	1
Chr1	40687569	40687870	AluYRa1	-	27	0	9	1	2	57	2	14	0.966102	5	0.0338983	1
Chr1	40697787	40698100	AluYRa1	+	94	1	51	0.989474	8	110	2	88	0.982143	10	0.00733083	1
Chr1	40717958	40718264	AluYRa1	+	2	0	26	1	2	134	0	46	1	9	0	1
Chr1	40856131	40856442	AluYRa1	+	38	1	41	0.974359	5	30	3	15	0.909091	3	0.0652681	1
Chr1	40894164	40894472	AluYRa1	+	32	12	67	0.727273	6	77	29	41	0.726415	7	0.000857633	1
Chr1	40907430	40907746	AluYRa1	-	48	4	20	0.923077	4	15	0	21	1	2	-0.0769231	1
Chr1	41148885	41149186	AluYRa1	+	8	1	11	0.888889	1	19	1	32	0.95	3	-0.0611111	1
Chr1	41202292	41202596	AluYRa1	+	5	16	27	0.238095	3	25	7	32	0.78125	4	-0.543155	1
Chr1	41370890	41371196	AluYRa1	+	25	2	24	0.925926	3	27	10	48	0.72973	5	0.196196	1
Chr1	41453769	41454077	AluYRa1	-	34	7	19	0.829268	4	21	3	6	0.875	2	-0.0457317	1
Chr1	41479489	41479795	AluYRa1	+	45	2	25	0.957447	4	20	0	16	1	2	-0.0425532	1
Chr1	41514622	41514925	AluYRa1	+	37	5	34	0.880952	4	55	1	39	0.982143	5	-0.10119	1
Chr1	41566456	41566760	AluYRa1	-	65	4	31	0.942029	5	17	1	1	0.944444	2	-0.00241546	1
Chr1	41609869	41610189	AluYRa1	-	36	1	34	0.972973	5	41	2	25	0.953488	4	0.0194846	1
Chr1	41612014	41612319	AluYRa1	-	30	4	42	0.882353	4	33	11	45	0.75	5	0.132353	1
Chr1	41643580	41643887	AluYRa1	-	17	1	1	0.944444	1	58	1	55	0.983051	6	-0.0386064	1
Chr1	41660891	41661198	AluYRa1	-	45	1	54	0.978261	5	27	1	52	0.964286	4	0.0139752	1
Chr1	41667498	41667812	AluYRa1	-	48	7	57	0.872727	5	56	4	39	0.933333	5	-0.0606061	1
Chr1	41693063	41693365	AluYRa1	+	0	0	0	NaN	0	34	4	48	0.894737	6	NaN	1
Chr1	41715153	41715457	AluYRa1	+	0	0	0	NaN	0	49	8	41	0.859649	7	NaN	1
Chr1	41733864	41734176	AluYRa1	+	25	0	20	1	3	35	10	58	0.777778	7	0.222222	1
Chr1	41935086	41935390	AluYRa1	+	52	14	46	0.787879	7	28	1	19	0.965517	3	-0.177638	1
Chr1	41959171	41959491	AluYRa1	+	38	1	21	0.974359	3	91	12	57	0.883495	8	0.0908638	1
Chr1	41982594	41982900	AluYRa1	-	24	0	20	1	2	26	1	17	0.962963	2	0.037037	1
Chr1	41987134	41987447	AluYRa1	-	41	5	30	0.891304	5	35	21	29	0.625	5	0.266304	1
Chr1	41989548	41989853	AluYRa1	+	68	13	53	0.839506	8	67	6	71	0.917808	8	-0.078302	1
Chr1	42029466	42029771	AluYRa1	+	28	7	20	0.8	5	1	0	12	1	1	-0.2	1
Chr1	42043932	42044245	AluYRa1	-	16	0	1	1	1	13	0	4	1	1	0	1
Chr1	42247399	42247706	AluYRa1	-	0	0	0	NaN	0	38	4	72	0.904762	6	NaN	1
Chr1	42458877	42459185	AluYRa1	+	44	1	18	0.977778	3	43	5	77	0.895833	6	0.0819444	1
Chr1	42482370	42482673	AluYRa1	+	48	1	31	0.979592	5	22	4	22	0.846154	3	0.133438	1
Chr1	42623853	42624155	AluYRa1	+	19	3	3	0.863636	2	41	4	27	0.911111	4	-0.0474747	1
Chr1	42729140	42729464	AluYRa1	+	31	0	32	1	4	10	0	10	1	1	0	1
Chr1	42828597	42828905	AluYRa1	+	11	0	8	1	1	115	17	85	0.871212	13	0.128788	1
Chr1	42839831	42840140	AluYRa1	+	43	3	34	0.934783	4	36	2	22	0.947368	3	-0.0125858	1
Chr1	42861520	42861832	AluYRa1	+	25	3	24	0.892857	4	12	4	10	0.75	2	0.142857	1
Chr1	42956723	42957030	AluYRa1	+	49	0	41	1	5	50	1	21	0.980392	5	0.0196078	1
Chr1	42962437	42962749	AluYRa1	+	90	2	92	0.978261	8	74	0	41	1	5	-0.0217391	1
Chr1	43025777	43026084	AluYRa1	+	30	6	27	0.833333	3	35	1	69	0.972222	5	-0.138889	1
Chr1	43038686	43038992	AluYRa1	-	41	4	27	0.911111	4	26	6	48	0.8125	5	0.0986111	1
Chr1	43064474	43064783	AluYRa1	+	43	4	19	0.914894	3	52	6	52	0.896552	5	0.0183419	1
Chr1	43191126	43191434	AluYRa1	-	0	0	0	NaN	0	69	11	63	0.8625	9	NaN	1
Chr1	43194379	43194685	AluYRa1	-	12	0	4	1	2	36	4	38	0.9	6	0.1	1
Chr1	43917817	43918122	AluYRa1	+	26	7	39	0.787879	6	39	9	42	0.8125	6	-0.0246212	1
Chr1	43955131	43955450	AluYRa1	-	39	0	15	1	3	43	2	63	0.955556	6	0.0444444	1
Chr1	44212551	44212855	AluYRa1	-	5	2	29	0.714286	2	16	0	31	1	3	-0.285714	1
Chr1	44381733	44382041	AluYRa1	-	14	0	7	1	1	43	1	40	0.977273	4	0.0227273	1
Chr1	44529761	44530070	AluYRa1	+	6	0	12	1	1	52	7	38	0.881356	6	0.118644	1
Chr1	44692411	44692719	AluYRa1	-	46	2	22	0.958333	5	53	5	40	0.913793	7	0.0445402	1
Chr1	44760472	44760783	AluYRa1	-	20	1	11	0.952381	2	19	0	29	1	3	-0.047619	1
Chr1	44784644	44790732	L1_RS2	+	33	7	67	0.825	3	67	28	184	0.705263	7	0.119737	1
Chr1	44853752	44854061	AluYRa1	+	17	2	19	0.894737	2	33	4	58	0.891892	5	0.00284495	1
Chr1	45122930	45129058	L1_RS2	+	185	60	132	0.755102	9	167	79	194	0.678862	13	0.0762403	1
Chr1	45539814	45540124	AluYRa1	+	9	0	4	1	1	32	5	41	0.864865	6	0.135135	1
Chr1	45551781	45552088	AluYRa1	+	5	2	9	0.714286	2	12	1	11	0.923077	3	-0.208791	1
Chr1	45577503	45577813	AluYRa1	+	46	3	19	0.938776	4	128	5	67	0.962406	10	-0.0236305	1
Chr1	45583246	45583556	AluYRa1	+	0	0	0	NaN	0	95	2	56	0.979381	9	NaN	1
Chr1	45621367	45621684	AluYRa1	+	55	1	39	0.982143	5	36	1	39	0.972973	4	0.00916988	1
Chr1	45686036	45686340	AluYRa1	+	37	0	3	1	2	25	0	8	1	2	0	1
Chr1	45745758	45746076	AluYRa1	-	83	2	37	0.976471	8	26	2	30	0.928571	4	0.0478992	1
Chr1	45778943	45779255	AluYRa1	-	44	2	17	0.956522	3	58	12	52	0.828571	6	0.12795	1
Chr1	45840881	45841186	AluYRa1	+	35	10	25	0.777778	5	14	2	12	0.875	2	-0.0972222	1
Chr1	46000198	46000507	AluYRa1	+	36	3	44	0.923077	4	46	6	49	0.884615	5	0.0384615	1
Chr1	46034808	46035117	AluYRa1	+	68	0	32	1	5	34	4	42	0.894737	4	0.105263	1
Chr1	46052968	46053283	AluYRa1	+	19	1	0	0.95	1	42	0	38	1	4	-0.05	1
Chr1	46069452	46069757	AluYRa1	-	45	3	4	0.9375	3	85	9	96	0.904255	10	0.0332447	1
Chr1	46293993	46294301	AluYRa1	-	45	1	26	0.978261	4	48	5	27	0.90566	5	0.0726005	1
Chr1	46318699	46319006	AluYRa1	+	10	0	26	1	2	36	4	32	0.9	4	0.1	1
Chr1	46520089	46520400	AluYRa1	+	8	1	60	0.888889	3	22	0	1	1	1	-0.111111	1
Chr1	46539403	46539709	AluYRa1	+	16	0	7	1	1	7	0	39	1	2	0	1
Chr1	46562610	46562918	AluYRa1	-	51	2	31	0.962264	5	12	0	9	1	1	-0.0377358	1
Chr1	46663723	46664043	AluYRa1	-	5	0	8	1	2	13	0	10	1	1	0	1
Chr1	46683251	46683556	AluYRa1	+	25	3	17	0.892857	3	48	7	59	0.872727	6	0.0201299	1
Chr1	46826582	46826903	AluYRa1	+	18	0	1	1	1	41	3	28	0.931818	5	0.0681818	1
Chr1	46841371	46841687	AluYRa1	-	32	1	37	0.969697	5	84	15	41	0.848485	10	0.121212	1
Chr1	46852848	46853175	AluYRa1	-	83	19	36	0.813725	6	56	4	80	0.933333	7	-0.119608	1
Chr1	46942618	46948753	L1_RS2	-	97	13	82	0.881818	6	59	12	73	0.830986	8	0.0508323	1
Chr1	47008150	47008456	AluYRa1	+	27	0	3	1	2	96	3	29	0.969697	9	0.030303	1
Chr1	47032571	47032881	AluYRa1	-	66	13	68	0.835443	10	61	8	41	0.884058	7	-0.0486149	1
Chr1	47365560	47365879	AluYRa1	+	32	0	24	1	4	33	6	46	0.846154	5	0.153846	1
Chr1	47417486	47417790	AluYRa1	-	37	1	38	0.973684	4	0	0	0	NaN	0	NaN	1
Chr1	47456855	47457164	AluYRa1	-	0	0	0	NaN	0	94	7	46	0.930693	7	NaN	1
Chr1	47478210	47478512	AluYRa1	-	39	1	20	0.975	4	19	0	12	1	3	-0.025	1
Chr1	47513877	47514180	AluYRa1	-	19	1	79	0.95	6	29	0	72	1	6	-0.05	1
Chr1	47517808	47518127	AluYRa1	-	38	16	18	0.703704	4	15	1	20	0.9375	2	-0.233796	1
Chr1	47644617	47644925	AluYRa1	-	26	0	10	1	2	37	1	34	0.973684	4	0.0263158	1
Chr1	47649615	47649917	AluYRa1	+	0	0	0	NaN	0	16	0	1	1	1	NaN	1
Chr1	47724738	47725047	AluYRa1	-	21	0	2	1	1	77	7	54	0.916667	6	0.0833333	1
Chr1	47804223	47804531	AluYRa1	+	12	19	15	0.387097	3	8	2	6	0.8	1	-0.412903	1
Chr1	47886331	47886645	AluYRa1	-	45	3	9	0.9375	3	37	14	47	0.72549	6	0.21201	1
Chr1	47898510	47898819	AluYRa1	+	36	6	22	0.857143	4	44	11	41	0.8	6	0.0571429	1
Chr1	47908398	47908706	AluYRa1	-	30	1	29	0.967742	3	65	13	62	0.833333	7	0.134409	1
Chr1	47956569	47956880	AluYRa1	-	22	3	14	0.88	5	17	4	19	0.809524	5	0.0704762	1
Chr1	48073071	48079218	L1_RS2	-	69	29	107	0.704082	8	131	43	96	0.752874	8	-0.0487919	1
Chr1	48110084	48110394	AluYRa1	+	33	0	21	1	3	18	2	19	0.9	3	0.1	1
Chr1	48225859	48226168	AluYRa1	+	38	1	31	0.974359	5	20	2	34	0.909091	4	0.0652681	1
Chr1	48415080	48415388	AluYRa1	+	48	0	76	1	7	75	5	82	0.9375	9	0.0625	1
Chr1	48430254	48430556	AluYRa1	+	17	1	1	0.944444	1	50	1	63	0.980392	6	-0.0359477	1
Chr1	48555106	48555426	AluYRa1	+	40	4	21	0.909091	4	22	8	44	0.733333	6	0.175758	1
Chr1	48722805	48723107	AluYRa1	+	40	12	24	0.769231	4	21	5	26	0.807692	3	-0.0384615	1
Chr1	48740814	48741117	AluYRa1	-	11	1	3	0.916667	1	55	3	32	0.948276	6	-0.0316092	1
Chr1	48835102	48835409	AluYRa1	+	32	0	8	1	3	32	3	61	0.914286	6	0.0857143	1
Chr1	48957445	48957754	AluYRa1	-	0	0	15	NaN	1	26	1	18	0.962963	3	NaN	1
Chr1	49074663	49074970	AluYRa1	-	58	6	12	0.90625	4	37	8	69	0.822222	6	0.0840278	1
Chr1	49141092	49141411	AluYRa1	+	48	2	22	0.96	4	64	6	56	0.914286	7	0.0457143	1
Chr1	49158932	49165079	L1_RS2	+	25	11	32	0.694444	3	134	51	123	0.724324	10	-0.0298799	1
Chr1	49395207	49395514	AluYRa1	-	52	4	43	0.928571	6	47	3	30	0.94	4	-0.0114286	1
Chr1	49426362	49432511	L1_RS2	+	118	36	131	0.766234	8	190	66	141	0.742188	9	0.0240463	1
Chr1	49468854	49469156	AluYRa1	+	48	5	44	0.90566	5	129	8	61	0.941606	9	-0.0359455	1
Chr1	49592184	49592494	AluYRa1	+	19	0	21	1	2	50	7	43	0.877193	5	0.122807	1
Chr1	49607019	49607328	AluYRa1	+	0	0	0	NaN	0	22	0	24	1	2	NaN	1
Chr1	49912323	49912630	AluYRa1	-	29	4	9	0.878788	3	38	5	53	0.883721	7	-0.00493305	1
Chr1	50013077	50013379	AluYRa1	+	26	6	28	0.8125	6	14	4	6	0.777778	2	0.0347222	1
Chr1	50194063	50194381	AluYRa1	-	11	0	2	1	1	16	3	20	0.842105	3	0.157895	1
Chr1	50216913	50217221	AluYRa1	+	35	4	36	0.897436	5	46	5	34	0.901961	5	-0.00452489	1
Chr1	50303521	50303829	AluYRa1	-	0	0	0	NaN	0	46	2	35	0.958333	5	NaN	1
Chr1	50350564	50350872	AluYRa1	+	32	16	52	0.666667	5	50	3	27	0.943396	4	-0.27673	1
Chr1	50372342	50372650	AluYRa1	+	14	0	2	1	1	31	2	15	0.939394	3	0.0606061	1
Chr1	50620246	50620553	AluYRa1	+	47	2	19	0.959184	4	28	1	32	0.965517	4	-0.00633357	1
Chr1	50702392	50702700	AluYRa1	-	18	2	44	0.9	4	45	7	29	0.865385	6	0.0346154	1
Chr1	50808134	50814231	L1_RS2	-	205	43	190	0.826613	11	234	70	183	0.769737	12	0.0568761	1
Chr1	51019603	51025716	L1_RS2	-	29	2	38	0.935484	5	127	22	228	0.852349	11	0.0831349	1
Chr1	51050351	51050659	AluYRa1	+	59	4	24	0.936508	5	40	5	12	0.888889	3	0.047619	1
Chr1	51079461	51079775	AluYRa1	+	38	2	42	0.95	5	93	2	31	0.978947	7	-0.0289474	1
Chr1	51387796	51388106	AluYRa1	-	62	5	24	0.925373	5	17	0	5	1	1	-0.0746269	1
Chr1	51396260	51396578	AluYRa1	-	12	1	5	0.923077	1	47	3	22	0.94	4	-0.0169231	1
Chr1	51430398	51430706	AluYRa1	-	30	2	53	0.9375	5	107	4	56	0.963964	10	-0.026464	1
Chr1	51445187	51445496	AluYRa1	+	39	1	29	0.975	4	99	10	101	0.908257	10	0.0667431	1
Chr1	51572585	51572887	AluYRa1	-	42	1	29	0.976744	4	30	0	30	1	3	-0.0232558	1
Chr1	51625519	51625827	AluYRa1	+	49	6	42	0.890909	5	91	12	97	0.883495	10	0.00741394	1
Chr1	51726142	51726448	AluYRa1	-	12	0	10	1	2	63	5	27	0.926471	5	0.0735294	1
Chr1	51789181	51789503	AluYRa1	-	34	1	9	0.971429	2	58	7	45	0.892308	5	0.0791209	1
Chr1	52226308	52226617	AluYRa1	+	32	1	27	0.969697	3	91	1	48	0.98913	7	-0.0194335	1
Chr1	52455314	52455621	AluYRa1	+	38	1	24	0.974359	3	35	0	7	1	2	-0.025641	1
Chr1	52535796	52541939	L1_RS2	-	165	20	53	0.891892	6	173	47	95	0.786364	10	0.105528	1
Chr1	52628774	52629077	AluYRa1	+	25	0	38	1	3	27	0	51	1	4	0	1
Chr1	52662303	52662608	AluYRa1	+	20	2	14	0.909091	3	23	8	29	0.741935	5	0.167155	1
Chr1	52701789	52702091	AluYRa1	-	26	5	9	0.83871	2	21	2	34	0.913043	3	-0.0743338	1
Chr1	52785894	52786199	AluYRa1	-	4	0	18	1	1	45	1	20	0.978261	3	0.0217391	1
Chr1	52818226	52818545	AluYRa1	-	45	0	14	1	3	113	4	47	0.965812	8	0.034188	1
Chr1	53007376	53007687	AluYRa1	+	13	0	27	1	2	73	3	44	0.960526	6	0.0394737	1
Chr1	53025470	53025780	AluYRa1	-	56	0	21	1	4	21	3	76	0.875	5	0.125	1
Chr1	53044500	53044808	AluYRa1	+	34	10	32	0.772727	4	35	9	13	0.795455	3	-0.0227273	1
Chr1	53061194	53061506	AluYRa1	+	42	0	33	1	5	63	3	90	0.954545	9	0.0454545	1
Chr1	53172382	53172691	AluYRa1	+	32	0	19	1	3	46	13	43	0.779661	6	0.220339	1
Chr1	53212991	53213296	AluYRa1	+	91	0	63	1	7	46	4	82	0.92	6	0.08	1
Chr1	53251907	53252234	AluYRa1	+	8	1	36	0.888889	3	54	12	24	0.818182	6	0.0707071	1
Chr1	53256003	53262157	L1_RS2	+	81	17	44	0.826531	4	282	80	180	0.779006	13	0.0475251	1
Chr1	53366789	53367098	AluYRa1	+	1	0	18	1	1	41	5	30	0.891304	4	0.108696	1
Chr1	53372956	53373264	AluYRa1	-	22	0	16	1	2	30	16	49	0.652174	5	0.347826	1
Chr1	53400401	53400726	AluYRa1	-	4	3	16	0.571429	2	62	1	25	0.984127	4	-0.412698	1
Chr1	53420806	53421111	AluYRa1	-	24	2	27	0.923077	3	54	26	61	0.675	8	0.248077	1
Chr1	53435740	53436049	AluYRa1	-	25	1	30	0.961538	3	17	7	18	0.708333	2	0.253205	1
Chr1	53474693	53480818	L1_RS2	-	83	17	71	0.83	7	22	10	63	0.6875	2	0.1425	1
Chr1	53574403	53574710	AluYRa1	-	81	0	17	1	6	34	1	19	0.971429	3	0.0285714	1
Chr1	53635660	53635972	AluYRa1	+	29	6	25	0.828571	4	46	7	37	0.867925	6	-0.0393531	1
Chr1	53809320	53809623	AluYRa1	-	0	0	0	NaN	0	15	5	60	0.75	4	NaN	1
Chr1	54017455	54017761	AluYRa1	-	77	4	51	0.950617	6	9	4	9	0.692308	1	0.25831	1
Chr1	54033831	54034140	AluYRa1	+	52	4	54	0.928571	6	70	8	22	0.897436	5	0.0311355	1
Chr1	54127969	54128270	AluYRa1	-	13	0	25	1	3	3	6	11	0.333333	2	0.666667	1
Chr1	54140607	54140911	AluYRa1	-	4	1	29	0.8	2	23	6	36	0.793103	4	0.00689655	1
Chr1	54172980	54173281	AluYRa1	+	28	2	25	0.933333	5	31	8	47	0.794872	8	0.138462	1
Chr1	54391775	54392087	AluYRa1	+	26	1	27	0.962963	3	4	0	32	1	2	-0.037037	1
Chr1	54424354	54430455	L1PA5	+	42	3	17	0.933333	7	45	30	79	0.6	8	0.333333	0.0238985
Chr1	54438354	54438679	AluYRa1	-	33	0	15	1	4	22	3	23	0.88	5	0.12	1
Chr1	54848497	54854648	L1_RS2	-	118	26	93	0.819444	5	109	62	83	0.637427	8	0.182018	0.764057
Chr1	54894156	54894465	AluYRa1	+	29	0	11	1	2	35	22	40	0.614035	6	0.385965	1
Chr1	54964580	54970756	L1PA5	+	142	29	75	0.830409	9	126	15	76	0.893617	10	-0.0632077	1
Chr1	55166266	55166569	AluYRa1	+	7	0	7	1	1	12	5	11	0.705882	2	0.294118	1
Chr1	55251810	55252123	AluYRa1	+	46	1	53	0.978723	7	40	1	59	0.97561	5	0.00311365	1
Chr1	55389736	55390040	AluYRa1	-	22	4	7	0.846154	2	68	4	50	0.944444	7	-0.0982906	1
Chr1	55763223	55763548	AluYRa1	-	18	0	10	1	2	51	8	25	0.864407	6	0.135593	1
Chr1	55820005	55820313	AluYRa1	+	23	2	17	0.92	2	46	0	59	1	5	-0.08	1
Chr1	55856704	55857008	AluYRa1	-	33	11	12	0.75	4	49	6	15	0.890909	6	-0.140909	1
Chr1	56212451	56212780	AluYRa1	+	49	2	69	0.960784	6	58	1	21	0.983051	4	-0.0222665	1
Chr1	56342853	56343169	AluYRa1	+	38	15	59	0.716981	7	6	1	10	0.857143	1	-0.140162	1
Chr1	56524033	56530193	L1_RS2	+	178	35	161	0.835681	8	97	50	89	0.659864	7	0.175817	0.281752
Chr1	57011023	57011334	AluYRa1	-	40	0	16	1	3	36	3	5	0.923077	2	0.0769231	1
Chr1	57053706	57054014	AluYRa1	+	25	0	30	1	4	69	3	75	0.958333	9	0.0416667	1
Chr1	57092112	57092429	AluYRa1	-	0	0	0	NaN	0	19	0	21	1	2	NaN	1
Chr1	57143988	57144297	AluYRa1	-	35	1	33	0.972222	3	57	0	35	1	4	-0.0277778	1
Chr1	57186887	57193024	L1_RS2	+	55	17	46	0.763889	4	252	66	261	0.792453	13	-0.0285639	1
Chr1	57256701	57257016	AluYRa1	-	33	4	23	0.891892	4	27	7	10	0.794118	3	0.0977742	1
Chr1	57298579	57298886	AluYRa1	+	8	2	32	0.8	3	1	0	22	1	2	-0.2	1
Chr1	57397310	57397614	AluYRa1	-	37	0	5	1	2	9	0	33	1	2	0	1
Chr1	57446239	57446541	AluYRa1	+	20	8	39	0.714286	6	22	0	26	1	4	-0.285714	1
Chr1	57570776	57571096	AluYRa1	-	16	1	23	0.941176	2	94	6	40	0.94	7	0.00117647	1
Chr1	57615247	57615557	AluYRa1	+	24	0	4	1	2	23	0	5	1	2	0	1
Chr1	57718288	57718598	AluYRa1	+	23	0	17	1	3	37	2	41	0.948718	4	0.0512821	1
Chr1	57805143	57805449	AluYRa1	-	67	5	72	0.930556	8	61	1	72	0.983871	8	-0.0533154	1
Chr1	57806253	57806555	AluYRa1	-	62	15	76	0.805195	9	50	7	46	0.877193	7	-0.0719982	1
Chr1	57871079	57871390	AluYRa1	-	33	0	18	1	3	47	1	36	0.979167	5	0.0208333	1
Chr1	57877500	57877805	AluYRa1	-	45	7	33	0.865385	5	18	8	20	0.692308	3	0.173077	1
Chr1	57987493	57987807	AluYRa1	-	56	1	51	0.982456	6	33	1	10	0.970588	2	0.0118679	1
Chr1	58016157	58016461	AluYRa1	+	4	0	11	1	1	34	0	17	1	4	0	1
Chr1	58110078	58110382	AluYRa1	-	7	0	0	1	1	71	4	25	0.946667	5	0.0533333	1
Chr1	58145957	58146266	AluYRa1	-	23	3	31	0.884615	3	27	5	11	0.84375	4	0.0408654	1
Chr1	58151465	58151775	AluYRa1	+	37	4	44	0.902439	5	56	17	63	0.767123	8	0.135316	1
Chr1	58162327	58162642	AluYRa1	-	46	1	16	0.978723	3	80	0	50	1	7	-0.0212766	1
Chr1	58175020	58175327	AluYRa1	+	9	12	44	0.428571	5	58	10	49	0.852941	9	-0.42437	1
Chr1	58181285	58181592	AluYRa1	-	42	3	43	0.933333	4	67	2	19	0.971014	4	-0.0376812	1
Chr1	58181723	58182037	AluYRa1	-	22	4	34	0.846154	4	45	2	13	0.957447	4	-0.111293	1
Chr1	58216239	58216544	AluYRa1	-	46	0	34	1	4	32	0	8	1	2	0	1
Chr1	58238068	58238376	AluYRa1	+	44	3	21	0.93617	4	57	1	27	0.982759	5	-0.0465884	1
Chr1	58238844	58239145	AluYRa1	-	4	1	20	0.8	2	83	3	9	0.965116	6	-0.165116	1
Chr1	58368841	58369148	AluYRa1	-	1	4	5	0.2	2	28	2	16	0.933333	6	-0.733333	1
Chr1	58505820	58506128	AluYRa1	+	43	1	16	0.977273	3	111	1	48	0.991071	8	-0.0137987	1
Chr1	58868556	58868858	AluYRa1	-	5	1	23	0.833333	2	65	5	35	0.928571	5	-0.0952381	1
Chr1	58895023	58895326	AluYRa1	+	35	0	41	1	4	76	2	34	0.974359	6	0.025641	1
Chr1	58952024	58952332	AluYRa1	+	27	1	37	0.964286	4	61	14	64	0.813333	10	0.150952	1
Chr1	58957709	58958017	AluYRa1	+	16	3	15	0.842105	2	50	19	50	0.724638	7	0.117468	1
Chr1	58975042	58975344	AluYRa1	-	14	12	19	0.538462	3	48	4	38	0.923077	6	-0.384615	1
Chr1	58991325	58991630	AluYRa1	-	7	1	38	0.875	4	12	0	8	1	1	-0.125	1
Chr1	59226016	59226322	AluYRa1	+	31	0	11	1	2	35	0	28	1	3	0	1
Chr1	59252177	59252484	AluYRa1	-	4	0	16	1	1	55	75	90	0.423077	11	0.576923	1
Chr1	59281179	59281485	AluYRa1	+	60	2	64	0.967742	6	53	1	51	0.981481	5	-0.0137395	1
Chr1	59294549	59294853	AluYRa1	+	27	4	21	0.870968	4	18	2	19	0.9	3	-0.0290323	1
Chr1	59311042	59311347	AluYRa1	+	36	3	37	0.923077	4	15	4	19	0.789474	2	0.133603	1
Chr1	59383084	59383389	AluYRa1	+	0	0	0	NaN	0	50	9	32	0.847458	7	NaN	1
Chr1	59389938	59390246	AluYRa1	+	29	3	16	0.90625	3	62	6	76	0.911765	9	-0.00551471	1
Chr1	59414668	59414979	AluYRa1	-	0	0	0	NaN	0	25	1	12	0.961538	2	NaN	1
Chr1	59428659	59428962	AluYRa1	-	33	6	22	0.846154	4	20	1	36	0.952381	3	-0.106227	1
Chr1	59455338	59455645	AluYRa1	-	25	1	34	0.961538	3	27	11	22	0.710526	3	0.251012	1
Chr1	59474897	59475199	AluYRa1	+	0	0	0	NaN	0	22	0	16	1	5	NaN	1
Chr1	59512313	59512622	AluYRa1	+	48	5	51	0.90566	8	37	5	37	0.880952	7	0.024708	1
Chr1	59524743	59525053	AluYRa1	-	49	6	84	0.890909	7	5	8	27	0.384615	2	0.506294	1
Chr1	59586951	59587255	AluYRa1	-	30	2	29	0.9375	5	49	3	20	0.942308	4	-0.00480769	1
Chr1	59609615	59609917	AluYRa1	+	89	6	73	0.936842	8	27	2	32	0.931034	3	0.00580762	1
Chr1	59763484	59763797	AluYRa1	+	99	3	24	0.970588	6	80	3	44	0.963855	7	0.00673281	1
Chr1	59779039	59779344	AluYRa1	+	27	16	52	0.627907	5	20	43	32	0.31746	5	0.310447	1
Chr1	59789190	59789492	AluYRa1	+	9	1	26	0.9	2	49	3	56	0.942308	6	-0.0423077	1
Chr1	59903464	59903767	AluYRa1	+	35	2	7	0.945946	2	28	3	13	0.903226	2	0.0427201	1
Chr1	60001824	60002129	AluYRa1	-	41	5	23	0.891304	3	121	3	41	0.975806	8	-0.0845021	1
Chr1	60036918	60037225	AluYRa1	-	50	3	31	0.943396	6	67	8	37	0.893333	8	0.0500629	1
Chr1	60174673	60174976	AluYRa1	-	13	0	5	1	1	14	1	21	0.933333	2	0.0666667	1
Chr1	60245078	60245380	AluYRa1	-	11	24	69	0.314286	6	0	2	19	0	1	0.314286	1
Chr1	60261441	60261755	AluYRa1	+	80	1	39	0.987654	6	39	1	20	0.975	3	0.0126543	1
Chr1	60281923	60282226	AluYRa1	+	57	5	57	0.919355	7	27	2	22	0.931034	3	-0.0116796	1
Chr1	60298408	60298715	AluYRa1	+	75	1	29	0.986842	7	73	0	47	1	8	-0.0131579	1
Chr1	60341101	60341402	AluYRa1	-	26	0	20	1	2	26	2	6	0.928571	2	0.0714286	1
Chr1	60345511	60345818	AluYRa1	-	23	0	25	1	3	38	4	22	0.904762	4	0.0952381	1
Chr1	60346838	60347148	AluYRa1	+	18	7	38	0.72	4	34	19	23	0.641509	4	0.0784906	1
Chr1	60354700	60355001	AluYRa1	-	40	0	40	1	4	60	2	18	0.967742	4	0.0322581	1
Chr1	60358508	60358814	AluYRa1	+	44	7	64	0.862745	7	7	0	13	1	1	-0.137255	1
Chr1	60377175	60377486	AluYRa1	+	55	5	35	0.916667	5	56	0	10	1	3	-0.0833333	1
Chr1	60388420	60388726	AluYRa1	-	84	6	80	0.933333	10	78	1	34	0.987342	7	-0.0540084	1
Chr1	60409934	60410244	AluYRa1	+	62	3	75	0.953846	7	17	0	23	1	2	-0.0461538	1
Chr1	60469919	60470223	AluYRa1	+	29	0	13	1	2	35	1	27	0.972222	3	0.0277778	1
Chr1	60504681	60504991	AluYRa1	+	33	0	7	1	2	24	6	30	0.8	3	0.2	1
Chr1	60561567	60561870	AluYRa1	+	29	1	18	0.966667	3	22	0	10	1	2	-0.0333333	1
Chr1	60737952	60738254	AluYRa1	-	25	3	36	0.892857	4	61	3	33	0.953125	6	-0.0602679	1
Chr1	60895469	60895773	AluYRa1	-	31	4	31	0.885714	3	91	13	28	0.875	6	0.0107143	1
Chr1	60920825	60921135	AluYRa1	-	41	1	16	0.97619	5	45	3	36	0.9375	7	0.0386905	1
Chr1	61088878	61089199	AluYRa1	-	41	5	37	0.891304	6	27	1	36	0.964286	4	-0.0729814	1
Chr1	61141813	61142119	AluYRa1	-	35	0	28	1	3	20	1	21	0.952381	2	0.047619	1
Chr1	61255781	61256090	AluYRa1	+	18	0	22	1	2	9	1	10	0.9	1	0.1	1
Chr1	61266940	61267251	AluYRa1	+	7	4	9	0.636364	1	54	9	37	0.857143	5	-0.220779	1
Chr1	61275449	61275760	AluYRa1	-	32	2	20	0.941176	3	55	20	64	0.733333	9	0.207843	1
Chr1	61316132	61316441	AluYRa1	-	37	1	62	0.973684	5	82	2	36	0.97619	6	-0.00250627	1
Chr1	61342649	61342961	AluYRa1	-	19	4	31	0.826087	3	39	6	17	0.866667	4	-0.0405797	1
Chr1	61356054	61356356	AluYRa1	-	51	9	72	0.85	6	70	1	39	0.985915	5	-0.135915	1
Chr1	61385559	61385872	AluYRa1	-	28	1	20	0.965517	3	78	2	48	0.975	6	-0.00948276	1
Chr1	61418576	61418880	AluYRa1	+	62	5	23	0.925373	6	18	1	11	0.947368	2	-0.0219953	1
Chr1	61448791	61449100	AluYRa1	+	41	3	36	0.931818	5	77	24	27	0.762376	8	0.169442	1
Chr1	61499656	61499962	AluYRa1	-	73	8	46	0.901235	8	38	36	34	0.513514	6	0.387721	0.00438002
Chr1	61548315	61548622	AluYRa1	+	37	4	31	0.902439	5	81	2	30	0.975904	6	-0.0734646	1
Chr1	61688263	61688570	AluYRa1	-	44	11	41	0.8	6	36	1	11	0.972973	3	-0.172973	1
Chr1	61944249	61944559	AluYRa1	+	55	8	68	0.873016	7	33	1	23	0.970588	3	-0.0975724	1
Chr1	62007754	62008059	AluYRa1	+	41	10	19	0.803922	5	29	3	24	0.90625	4	-0.102328	1
Chr1	62020187	62020499	AluYRa1	-	18	7	77	0.72	6	66	2	17	0.970588	5	-0.250588	1
Chr1	62061762	62062063	AluYRa1	+	13	3	44	0.8125	3	43	1	36	0.977273	4	-0.164773	1
Chr1	62273475	62273784	AluYRa1	+	72	0	34	1	6	49	5	54	0.907407	6	0.0925926	1
Chr1	62314162	62314471	AluYRa1	+	12	1	0	0.923077	1	23	1	15	0.958333	3	-0.0352564	1
Chr1	62325833	62326143	AluYRa1	-	29	1	12	0.966667	3	39	4	8	0.906977	3	0.0596899	1
Chr1	62410768	62411071	AluYRa1	-	29	5	58	0.852941	4	74	3	38	0.961039	5	-0.108098	1
Chr1	62531904	62532224	AluYRa1	+	0	0	0	NaN	0	35	3	18	0.921053	4	NaN	1
Chr1	62604803	62605109	AluYRa1	+	82	7	82	0.921348	9	54	5	36	0.915254	5	0.00609408	1
Chr1	62624365	62624672	AluYRa1	-	30	2	49	0.9375	5	62	8	82	0.885714	8	0.0517857	1
Chr1	62636812	62637121	AluYRa1	+	13	4	23	0.764706	2	48	1	111	0.979592	8	-0.214886	1
Chr1	62649894	62650196	AluYRa1	+	31	4	13	0.885714	3	20	43	31	0.31746	6	0.568254	1
Chr1	62694906	62695239	AluYRa1	-	11	7	32	0.611111	3	45	12	28	0.789474	5	-0.178363	1
Chr1	62697712	62698016	AluYRa1	+	8	0	11	1	1	38	2	45	0.95	5	0.05	1
Chr1	62744220	62744529	AluYRa1	-	30	2	19	0.9375	3	32	0	12	1	3	-0.0625	1
Chr1	62843635	62843939	AluYRa1	+	15	1	18	0.9375	2	21	39	28	0.35	4	0.5875	1
Chr1	62902961	62903265	AluYRa1	-	66	5	46	0.929577	7	33	0	18	1	3	-0.0704225	1
Chr1	62916810	62917115	AluYRa1	-	0	0	0	NaN	0	21	8	56	0.724138	5	NaN	1
Chr1	62989998	62990310	AluYRa1	-	12	1	4	0.923077	2	35	9	24	0.795455	5	0.127622	1
Chr1	63007441	63007750	AluYRa1	+	48	2	50	0.96	5	40	4	36	0.909091	4	0.0509091	1
Chr1	63031918	63032221	AluYRa1	+	12	0	6	1	1	7	0	23	1	2	0	1
Chr1	63038806	63039115	AluYRa1	+	12	6	55	0.666667	4	0	6	9	0	1	0.666667	1
Chr1	63061287	63061594	AluYRa1	-	29	4	21	0.878788	3	47	0	28	1	5	-0.121212	1
Chr1	63075455	63075764	AluYRa1	+	25	0	17	1	2	53	1	51	0.981481	5	0.0185185	1
Chr1	63084968	63085274	AluYRa1	+	21	3	10	0.875	2	33	2	16	0.942857	3	-0.0678571	1
Chr1	63086238	63086547	AluYRa1	+	43	2	24	0.955556	5	24	1	23	0.96	3	-0.00444444	1
Chr1	63141858	63142169	AluYRa1	+	3	1	15	0.75	1	78	8	66	0.906977	8	-0.156977	1
Chr1	63197979	63198286	AluYRa1	+	24	8	43	0.75	5	0	21	25	0	4	0.75	0.000655338
Chr1	63315873	63316176	AluYRa1	+	81	1	44	0.987805	6	49	0	35	1	4	-0.0121951	1
Chr1	63385128	63385432	AluYRa1	+	19	0	11	1	2	21	0	24	1	3	0	1
Chr1	63390077	63390386	AluYRa1	+	0	0	3	NaN	1	20	1	35	0.952381	4	NaN	1
Chr1	63405893	63406194	AluYRa1	-	75	4	57	0.949367	8	41	0	13	1	4	-0.0506329	1
Chr1	63426826	63433162	L1PA5	+	41	8	17	0.836735	6	133	44	68	0.751412	13	0.0853223	1
Chr1	63587338	63587646	AluYRa1	+	0	0	0	NaN	0	60	5	25	0.923077	6	NaN	1
Chr1	63608294	63608602	AluYRa1	-	44	7	39	0.862745	5	43	2	27	0.955556	4	-0.0928105	1
Chr1	63610358	63610672	AluYRa1	-	5	1	13	0.833333	1	58	6	50	0.90625	6	-0.0729167	1
Chr1	63703969	63704294	AluYRa1	-	32	2	35	0.941176	3	55	2	51	0.964912	5	-0.0237358	1
Chr1	63892923	63893224	AluYRa1	+	10	0	24	1	2	17	1	27	0.944444	3	0.0555556	1
Chr1	63919808	63920113	AluYRa1	+	12	1	11	0.923077	2	32	6	10	0.842105	4	0.0809717	1
Chr1	64053570	64053875	AluYRa1	-	28	2	7	0.933333	2	7	0	5	1	1	-0.0666667	1
Chr1	64171045	64171354	AluYRa1	-	50	18	27	0.735294	5	56	14	41	0.8	6	-0.0647059	1
Chr1	64188084	64188396	AluYRa1	-	52	16	65	0.764706	7	52	4	58	0.928571	6	-0.163866	1
Chr1	64267273	64267575	AluYRa1	-	68	3	32	0.957746	7	55	3	14	0.948276	4	0.00947062	1
Chr1	64377274	64377584	AluYRa1	+	45	0	32	1	4	13	0	22	1	2	0	1
Chr1	64459893	64460203	AluYRa1	+	21	0	23	1	2	31	32	91	0.492063	7	0.507937	1
Chr1	64488640	64488944	AluYRa1	-	53	1	26	0.981481	5	18	0	23	1	3	-0.0185185	1
Chr1	64793193	64793497	AluYRa1	-	43	0	17	1	3	37	2	21	0.948718	3	0.0512821	1
Chr1	64889850	64890154	AluYRa1	+	42	1	45	0.976744	6	21	0	27	1	3	-0.0232558	1
Chr1	64944710	64945019	AluYRa1	+	13	0	10	1	1	84	4	50	0.954545	6	0.0454545	1
Chr1	65005093	65005399	AluYRa1	+	20	6	8	0.769231	2	43	6	43	0.877551	6	-0.10832	1
Chr1	65149760	65150066	AluYRa1	+	30	5	31	0.857143	3	112	3	92	0.973913	10	-0.11677	1
Chr1	65162335	65168464	L1PA5	+	69	18	66	0.793103	14	175	17	85	0.911458	14	-0.118355	1
Chr1	65251282	65251591	AluYRa1	-	24	0	14	1	2	48	2	26	0.96	5	0.04	1
Chr1	65276910	65277219	AluYRa1	-	30	3	12	0.909091	3	35	0	28	1	3	-0.0909091	1
Chr1	65641969	65642275	AluYRa1	-	49	5	58	0.907407	7	10	11	27	0.47619	3	0.431217	1
Chr1	65982657	65988814	L1_RS2	+	68	14	49	0.829268	3	106	48	111	0.688312	7	0.140957	1
Chr1	66201739	66202047	AluYRa1	+	16	0	5	1	2	37	1	16	0.973684	3	0.0263158	1
Chr1	66292930	66293232	AluYRa1	-	72	1	53	0.986301	6	47	8	50	0.854545	5	0.131756	1
Chr1	66386882	66387194	AluYRa1	+	42	0	18	1	4	26	5	25	0.83871	3	0.16129	1
Chr1	66421866	66422175	AluYRa1	+	40	5	47	0.888889	4	37	8	47	0.822222	4	0.0666667	1
Chr1	66510697	66511005	AluYRa1	+	8	0	6	1	1	39	2	36	0.95122	6	0.0487805	1
Chr1	66540287	66540593	AluYRa1	+	26	2	28	0.928571	4	31	2	37	0.939394	5	-0.0108225	1
Chr1	66630452	66630760	AluYRa1	+	11	0	6	1	1	45	7	33	0.865385	5	0.134615	1
Chr1	66633462	66633770	AluYRa1	+	41	1	12	0.97619	3	34	8	30	0.809524	4	0.166667	1
Chr1	67101612	67101927	AluYRa1	-	47	0	33	1	4	65	8	87	0.890411	8	0.109589	1
Chr1	67263696	67264002	AluYRa1	-	62	2	16	0.96875	5	38	4	38	0.904762	5	0.0639881	1
Chr1	67406793	67407099	AluYRa1	-	15	19	6	0.441176	2	70	7	46	0.909091	7	-0.467914	1
Chr1	68014022	68014330	AluYRa1	-	28	0	29	1	3	53	7	45	0.883333	6	0.116667	1
Chr1	68056231	68056538	AluYRa1	+	22	0	29	1	3	25	1	42	0.961538	4	0.0384615	1
Chr1	68312748	68313054	AluYRa1	+	25	4	28	0.862069	3	34	2	40	0.944444	4	-0.0823755	1
Chr1	68387220	68393658	L1PA5	+	105	24	78	0.813953	13	88	41	48	0.682171	13	0.131783	1
Chr1	68463184	68469325	L1PA5	-	104	30	57	0.776119	12	101	48	85	0.677852	11	0.0982671	1
Chr1	68497526	68497831	AluYRa1	+	56	7	39	0.888889	6	17	3	31	0.85	3	0.0388889	1
Chr1	68509664	68509965	AluYRa1	+	70	0	30	1	5	42	6	42	0.875	5	0.125	1
Chr1	68545436	68545738	AluYRa1	+	2	2	36	0.5	2	27	1	52	0.964286	4	-0.464286	1
Chr1	68643192	68643501	AluYRa1	+	0	0	0	NaN	0	63	9	50	0.875	9	NaN	1
Chr1	68665442	68665753	AluYRa1	-	49	1	45	0.98	6	69	4	35	0.945205	6	0.0347945	1
Chr1	68675202	68675507	AluYRa1	-	16	0	4	1	1	100	8	52	0.925926	8	0.0740741	1
Chr1	68687104	68687408	AluYRa1	+	51	10	65	0.836066	6	37	3	23	0.925	3	-0.0889344	1
Chr1	68706000	68706308	AluYRa1	+	29	7	30	0.805556	3	21	0	1	1	1	-0.194444	1
Chr1	68714030	68714336	AluYRa1	+	42	0	21	1	3	5	0	16	1	1	0	1
Chr1	68751952	68752263	AluYRa1	-	25	8	90	0.757576	6	11	3	28	0.785714	2	-0.0281385	1
Chr1	68771995	68772302	AluYRa1	-	45	7	29	0.865385	4	72	10	44	0.878049	6	-0.0126642	1
Chr1	68783864	68784168	AluYRa1	+	49	0	51	1	7	19	6	39	0.76	4	0.24	1
Chr1	68932426	68932734	AluYRa1	+	10	1	29	0.909091	2	36	2	42	0.947368	4	-0.0382775	1
Chr1	68960980	68961286	AluYRa1	-	11	2	10	0.846154	2	11	1	14	0.916667	3	-0.0705128	1
Chr1	68969930	68970239	AluYRa1	-	47	6	27	0.886792	4	46	4	36	0.92	5	-0.0332075	1
Chr1	68976837	68977146	AluYRa1	+	3	0	19	1	2	53	0	61	1	6	0	1
Chr1	69023234	69023544	AluYRa1	+	0	0	0	NaN	0	81	13	77	0.861702	9	NaN	1
Chr1	69037378	69037686	AluYRa1	-	24	4	17	0.857143	3	49	7	34	0.875	6	-0.0178571	1
Chr1	69049065	69049372	AluYRa1	+	58	5	31	0.920635	5	25	6	11	0.806452	2	0.114183	1
Chr1	69099646	69099952	AluYRa1	+	17	3	21	0.85	3	20	24	70	0.454545	7	0.395455	1
Chr1	69158629	69158932	AluYRa1	-	43	1	10	0.977273	3	13	4	37	0.764706	3	0.212567	1
Chr1	69169542	69169850	AluYRa1	+	0	0	0	NaN	0	29	1	39	0.966667	3	NaN	1
Chr1	69209462	69209766	AluYRa1	+	51	3	82	0.944444	8	14	2	18	0.875	2	0.0694444	1
Chr1	69249246	69249547	AluYRa1	-	30	5	50	0.857143	5	44	5	36	0.897959	5	-0.0408163	1
Chr1	69311309	69311617	AluYRa1	+	1	2	20	0.333333	1	53	4	54	0.929825	6	-0.596491	1
Chr1	69358776	69359086	AluYRa1	+	16	0	20	1	2	47	1	24	0.979167	4	0.0208333	1
Chr1	69404784	69405090	AluYRa1	+	25	1	28	0.961538	3	54	9	70	0.857143	7	0.104396	1
Chr1	69495779	69496085	AluYRa1	-	12	0	5	1	1	52	5	45	0.912281	6	0.0877193	1
Chr1	69498353	69498661	AluYRa1	+	3	0	0	1	1	38	4	34	0.904762	4	0.0952381	1
Chr1	69543964	69544292	AluYRa1	-	45	2	30	0.957447	5	61	1	41	0.983871	6	-0.0264242	1
Chr1	69625187	69625494	AluYRa1	-	32	0	36	1	4	15	2	17	0.882353	2	0.117647	1
Chr1	69641825	69642136	AluYRa1	-	48	7	59	0.872727	7	3	7	18	0.3	2	0.572727	1
Chr1	69714751	69715057	AluYRa1	+	18	0	22	1	2	33	11	36	0.75	4	0.25	1
Chr1	69745682	69745990	AluYRa1	+	18	1	23	0.947368	2	3	3	18	0.5	2	0.447368	1
Chr1	69748564	69748865	AluYRa1	+	30	0	15	1	3	0	2	13	0	1	1	1
Chr1	69757435	69757740	AluYRa1	+	60	4	46	0.9375	5	48	1	39	0.979592	4	-0.0420918	1
Chr1	69790537	69790843	AluYRa1	-	1	2	36	0.333333	3	14	4	31	0.777778	3	-0.444444	1
Chr1	69802583	69802892	AluYRa1	-	39	0	18	1	3	95	5	52	0.95	8	0.05	1
Chr1	69816700	69817009	AluYRa1	+	34	2	48	0.944444	4	34	2	27	0.944444	3	0	1
Chr1	69825151	69825455	AluYRa1	+	19	1	18	0.95	2	62	8	67	0.885714	8	0.0642857	1
Chr1	69839334	69839640	AluYRa1	+	40	4	36	0.909091	4	46	1	33	0.978723	4	-0.0696325	1
Chr1	69843690	69843993	AluYRa1	-	38	1	15	0.974359	3	49	3	62	0.942308	6	0.0320513	1
Chr1	69852229	69852530	AluYRa1	+	15	4	32	0.789474	3	65	5	21	0.928571	6	-0.139098	1
Chr1	69907180	69907498	AluYRa1	-	43	0	17	1	3	31	2	67	0.939394	5	0.0606061	1
Chr1	69935277	69935578	AluYRa1	-	60	0	60	1	6	35	2	3	0.945946	2	0.0540541	1
Chr1	69954367	69954698	AluYRa1	+	38	1	15	0.974359	3	34	0	38	1	4	-0.025641	1
Chr1	69957328	69957637	AluYRa1	+	28	2	14	0.933333	4	16	5	34	0.761905	5	0.171429	1
Chr1	70019498	70019800	AluYRa1	-	16	1	25	0.941176	3	35	5	30	0.875	5	0.0661765	1
Chr1	70042601	70042909	AluYRa1	+	21	0	12	1	3	40	0	4	1	4	0	1
Chr1	70192466	70192769	AluYRa1	-	31	6	28	0.837838	4	53	4	35	0.929825	6	-0.0919867	1
Chr1	70218662	70218970	AluYRa1	-	60	6	42	0.909091	6	56	2	18	0.965517	4	-0.0564263	1
Chr1	70317363	70317664	AluYRa1	+	9	0	11	1	1	15	0	48	1	4	0	1
Chr1	70364846	70365148	AluYRa1	+	53	7	45	0.883333	5	123	1	55	0.991935	10	-0.108602	1
Chr1	70391674	70391975	AluYRa1	-	10	3	11	0.769231	2	44	0	36	1	4	-0.230769	1
Chr1	70457449	70457757	AluYRa1	+	18	1	29	0.947368	3	18	4	42	0.818182	4	0.129187	1
Chr1	70585074	70585388	AluYRa1	+	35	12	48	0.744681	5	39	4	33	0.906977	4	-0.162296	1
Chr1	70813818	70814127	AluYRa1	-	53	2	50	0.963636	5	56	16	56	0.777778	7	0.185859	1
Chr1	70843237	70843549	AluYRa1	-	6	0	13	1	1	45	20	27	0.692308	5	0.307692	1
Chr1	70934562	70934878	AluYRa1	-	101	1	58	0.990196	9	0	0	0	NaN	0	NaN	1
Chr1	70964097	70964408	AluYRa1	-	36	8	38	0.818182	5	34	1	33	0.971429	4	-0.153247	1
Chr1	71271601	71271908	AluYRa1	+	9	0	14	1	2	31	1	19	0.96875	3	0.03125	1
Chr1	71532764	71533074	AluYRa1	-	34	2	21	0.944444	3	32	1	27	0.969697	4	-0.0252525	1
Chr1	71729727	71730030	AluYRa1	+	55	3	18	0.948276	4	63	8	43	0.887324	6	0.0609519	1
Chr1	71738272	71738574	AluYRa1	-	22	7	22	0.758621	3	31	4	51	0.885714	6	-0.127094	1
Chr1	72033534	72033876	AluYRa1	+	0	0	0	NaN	0	36	5	35	0.878049	4	NaN	1
Chr1	72102801	72103119	AluYRa1	-	61	2	18	0.968254	5	16	0	2	1	1	-0.031746	1
Chr1	72106857	72107160	AluYRa1	-	36	9	45	0.8	5	17	4	15	0.809524	2	-0.00952381	1
Chr1	72231797	72237943	L1_RS2	-	118	44	144	0.728395	7	99	58	67	0.630573	9	0.0978218	1
Chr1	72281263	72281570	AluYRa1	+	7	0	8	1	1	5	1	9	0.833333	1	0.166667	1
Chr1	72308795	72309098	AluYRa1	-	28	0	12	1	2	70	1	49	0.985915	6	0.0140845	1
Chr1	72339942	72340251	AluYRa1	+	34	0	6	1	2	1	11	8	0.0833333	1	0.916667	1
Chr1	72492416	72498574	L1_RS2	-	78	40	142	0.661017	5	68	31	98	0.686869	5	-0.0258517	1
Chr1	72815794	72821937	L1_RS2	-	133	27	180	0.83125	10	47	15	39	0.758065	4	0.0731855	1
Chr1	72889555	72889862	AluYRa1	-	0	7	0	0	1	16	1	2	0.941176	1	-0.941176	1
Chr1	72968015	72974144	L1_RS2	+	82	13	51	0.863158	7	153	64	75	0.705069	8	0.158089	1
Chr1	73072815	73073136	AluYRa1	-	49	4	19	0.924528	4	11	2	5	0.846154	1	0.0783745	1
Chr1	73265984	73266293	AluYRa1	+	24	3	13	0.888889	2	40	9	31	0.816327	4	0.0725624	1
Chr1	73317154	73323281	L1_RS2	+	94	37	90	0.717557	8	124	66	97	0.652632	7	0.0649257	1
Chr1	73336040	73336349	AluYRa1	+	0	15	4	0	1	4	1	14	0.8	1	-0.8	1
Chr1	73454581	73454887	AluYRa1	+	30	2	19	0.9375	3	61	7	34	0.897059	6	0.0404412	1
Chr1	73566622	73566954	AluYRa1	+	32	3	19	0.914286	4	68	3	57	0.957746	8	-0.0434608	1
Chr1	73600551	73600864	AluYRa1	-	9	0	24	1	3	9	2	26	0.818182	4	0.181818	1
Chr1	73663360	73663672	AluYRa1	-	22	8	13	0.733333	3	4	2	9	0.666667	1	0.0666667	1
Chr1	73737555	73737864	AluYRa1	+	50	13	27	0.793651	5	18	0	18	1	2	-0.206349	1
Chr1	73793645	73793946	AluYRa1	+	18	11	43	0.62069	4	30	2	52	0.9375	4	-0.31681	1
Chr1	74236272	74236587	AluYRa1	-	43	2	27	0.955556	4	79	6	41	0.929412	7	0.0261438	1
Chr1	74462696	74463006	AluYRa1	+	17	0	49	1	3	58	11	41	0.84058	5	0.15942	1
Chr1	74986944	74987246	AluYRa1	+	28	0	9	1	3	47	1	16	0.979167	4	0.0208333	1
Chr1	75653766	75654075	AluYRa1	-	68	1	50	0.985507	7	17	0	21	1	2	-0.0144928	1
Chr1	75911320	75911624	AluYRa1	+	17	2	7	0.894737	2	6	1	6	0.857143	1	0.037594	1
Chr1	75950152	75950466	AluYRa1	+	0	0	0	NaN	0	31	0	53	1	4	NaN	1
Chr1	75986668	75986971	AluYRa1	-	24	2	22	0.923077	3	37	2	25	0.948718	4	-0.025641	1
Chr1	75989229	75989531	AluYRa1	-	21	4	17	0.84	2	26	1	15	0.962963	2	-0.122963	1
Chr1	76470499	76476646	L1_RS2	-	136	20	48	0.871795	5	128	15	82	0.895105	8	-0.02331	1
Chr1	76634395	76634716	AluYRa1	-	18	0	14	1	3	22	0	25	1	3	0	1
Chr1	76886623	76886950	AluYRa1	-	31	2	46	0.939394	4	56	12	42	0.823529	5	0.115865	1
Chr1	76909271	76909575	AluYRa1	+	46	1	73	0.978723	6	57	9	114	0.863636	9	0.115087	1
Chr1	77018387	77018688	AluYRa1	-	16	1	12	0.941176	2	34	6	11	0.85	3	0.0911765	1
Chr1	77029568	77029877	AluYRa1	+	12	0	28	1	2	40	5	47	0.888889	6	0.111111	1
Chr1	77139354	77139656	AluYRa1	+	40	0	29	1	3	31	0	25	1	4	0	1
Chr1	77186079	77186387	AluYRa1	+	13	3	9	0.8125	2	45	0	43	1	4	-0.1875	1
Chr1	77270856	77276982	L1_RS2	+	127	34	90	0.78882	6	147	97	194	0.602459	10	0.186361	0.172408
Chr1	77445361	77445673	AluYRa1	+	105	2	64	0.981308	9	33	1	4	0.970588	2	0.0107202	1
Chr1	77526959	77527269	AluYRa1	+	27	4	20	0.870968	3	36	0	15	1	3	-0.129032	1
Chr1	77531156	77531477	AluYRa1	+	31	2	32	0.939394	5	35	2	19	0.945946	6	-0.00655201	1
Chr1	77612828	77613134	AluYRa1	+	8	1	11	0.888889	1	24	0	16	1	2	-0.111111	1
Chr1	77686050	77686352	AluYRa1	-	2	1	16	0.666667	1	28	8	72	0.777778	6	-0.111111	1
Chr1	77686852	77687160	AluYRa1	+	0	0	0	NaN	0	26	7	59	0.787879	6	NaN	1
Chr1	77749656	77749963	AluYRa1	-	68	0	37	1	5	24	7	53	0.774194	4	0.225806	1
Chr1	77807925	77808228	AluYRa1	-	37	3	40	0.925	5	27	0	21	1	3	-0.075	1
Chr1	77840530	77846925	L1PA5	+	133	26	93	0.836478	10	164	36	143	0.82	15	0.016478	1
Chr1	77911409	77911714	AluYRa1	-	41	1	15	0.97619	3	32	2	15	0.941176	3	0.035014	1
Chr1	77988804	77994950	L1_RS2	-	292	18	135	0.941935	10	123	27	136	0.82	9	0.121935	0.159434
Chr1	78010364	78010672	AluYRa1	+	13	0	23	1	2	59	3	34	0.951613	6	0.0483871	1
Chr1	78107892	78114038	L1_RS2	-	50	19	96	0.724638	7	189	70	70	0.72973	9	-0.00509205	1
Chr1	78117574	78117877	AluYRa1	-	7	0	10	1	1	20	2	29	0.909091	3	0.0909091	1
Chr1	78132167	78132475	AluYRa1	+	47	0	11	1	4	20	0	14	1	2	0	1
Chr1	78209178	78209481	AluYRa1	-	35	2	35	0.945946	4	60	0	30	1	5	-0.0540541	1
Chr1	78268934	78269240	AluYRa1	+	19	5	19	0.791667	3	42	7	48	0.857143	6	-0.0654762	1
Chr1	78326662	78326968	AluYRa1	-	24	0	64	1	4	26	1	17	0.962963	2	0.037037	1
Chr1	78336533	78336837	AluYRa1	-	8	2	6	0.8	1	37	4	36	0.902439	5	-0.102439	1
Chr1	78347319	78347647	AluYRa1	-	101	7	60	0.935185	8	28	19	58	0.595745	5	0.339441	0.0407037
Chr1	78383534	78383839	AluYRa1	-	44	0	16	1	3	21	1	18	0.954545	2	0.0454545	1
Chr1	78383852	78384166	AluYRa1	-	30	0	29	1	4	20	2	16	0.909091	2	0.0909091	1
Chr1	78387002	78387309	AluYRa1	-	12	0	9	1	1	35	2	29	0.945946	4	0.0540541	1
Chr1	78396702	78397011	AluYRa1	+	15	2	4	0.882353	1	26	3	16	0.896552	3	-0.0141988	1
Chr1	78662633	78668771	L1_RS2	+	74	20	67	0.787234	4	31	19	27	0.62	1	0.167234	1
Chr1	78708847	78709157	AluYRa1	-	78	2	26	0.975	6	27	0	13	1	2	-0.025	1
Chr1	78818704	78824799	L1_RS2	-	88	23	138	0.792793	7	341	129	256	0.725532	18	0.0672609	1
Chr1	78863823	78864130	AluYRa1	+	54	1	25	0.981818	4	37	0	23	1	3	-0.0181818	1
Chr1	78864984	78865292	AluYRa1	-	11	1	42	0.916667	3	37	6	33	0.860465	4	0.0562016	1
Chr1	78871695	78872002	AluYRa1	+	49	0	15	1	4	44	0	36	1	5	0	1
Chr1	79050448	79056601	L1_RS2	-	134	42	92	0.761364	11	201	68	149	0.747212	13	0.0141517	1
Chr1	79146080	79152197	L1_RS2	+	157	31	115	0.835106	7	168	52	149	0.763636	9	0.07147	1
Chr1	79154308	79154620	AluYRa1	+	35	2	51	0.945946	6	29	5	23	0.852941	3	0.0930048	1
Chr1	79207190	79213359	L1_RS2	-	131	31	93	0.808642	10	187	76	174	0.711027	8	0.0976154	1
Chr1	79444743	79445054	AluYRa1	+	15	7	22	0.681818	4	31	4	63	0.885714	7	-0.203896	1
Chr1	79679797	79680105	AluYRa1	+	33	3	9	0.916667	3	26	0	12	1	3	-0.0833333	1
Chr1	79763578	79763891	AluYRa1	+	4	0	16	1	1	65	0	51	1	6	0	1
Chr1	79978815	79979122	AluYRa1	-	18	1	23	0.947368	3	5	0	5	1	1	-0.0526316	1
Chr1	80199270	80199573	AluYRa1	+	34	0	57	1	5	22	3	19	0.88	2	0.12	1
Chr1	80446441	80446748	AluYRa1	+	23	10	39	0.69697	4	18	16	10	0.529412	3	0.167558	1
Chr1	80465693	80465999	AluYRa1	-	40	5	12	0.888889	3	39	0	26	1	4	-0.111111	1
Chr1	80682342	80682646	AluYRa1	-	29	6	22	0.828571	3	8	18	11	0.307692	3	0.520879	1
Chr1	80688932	80689239	AluYRa1	-	57	1	50	0.982759	6	53	0	37	1	5	-0.0172414	1
Chr1	80709056	80709366	AluYRa1	+	14	1	4	0.933333	1	71	6	37	0.922078	6	0.0112554	1
Chr1	80778037	80778338	AluYRa1	-	8	2	13	0.8	1	17	0	6	1	1	-0.2	1
Chr1	80780115	80780431	AluYRa1	+	24	0	18	1	3	1	5	13	0.166667	2	0.833333	1
Chr1	80805172	80805479	AluYRa1	-	34	2	57	0.944444	9	20	1	2	0.952381	1	-0.00793651	1
Chr1	80959506	80965633	L1_RS2	-	123	26	88	0.825503	7	174	23	63	0.883249	6	-0.0577454	1
Chr1	81139819	81140123	AluYRa1	-	50	8	22	0.862069	5	57	21	50	0.730769	8	0.1313	1
Chr1	81437443	81437750	AluYRa1	+	38	0	30	1	4	52	1	32	0.981132	5	0.0188679	1
Chr1	81449279	81449588	AluYRa1	+	24	13	71	0.648649	6	50	10	18	0.833333	5	-0.184685	1
Chr1	81452491	81452794	AluYRa1	+	16	15	29	0.516129	4	21	3	36	0.875	4	-0.358871	1
Chr1	81491866	81492174	AluYRa1	+	1	0	1	1	1	11	0	7	1	1	0	1
Chr1	81567349	81567655	AluYRa1	-	10	3	26	0.769231	4	17	9	19	0.653846	4	0.115385	1
Chr1	81577267	81577578	AluYRa1	-	31	5	36	0.861111	4	81	12	105	0.870968	11	-0.00985663	1
Chr1	81578210	81578512	AluYRa1	+	19	3	51	0.863636	5	64	11	76	0.853333	9	0.010303	1
Chr1	81611392	81611704	AluYRa1	-	22	0	20	1	2	21	1	62	0.954545	4	0.0454545	1
Chr1	81633578	81633884	AluYRa1	+	8	0	17	1	2	37	3	61	0.925	7	0.075	1
Chr1	81634469	81634779	AluYRa1	+	20	0	37	1	3	51	2	42	0.962264	5	0.0377358	1
Chr1	81636724	81637033	AluYRa1	+	8	2	44	0.8	3	35	3	40	0.921053	5	-0.121053	1
Chr1	81659831	81660136	AluYRa1	-	99	0	31	1	7	10	0	11	1	1	0	1
Chr1	81687338	81687650	AluYRa1	+	26	0	6	1	2	14	1	13	0.933333	2	0.0666667	1
Chr1	81722232	81722541	AluYRa1	-	11	1	5	0.916667	1	47	3	69	0.94	7	-0.0233333	1
Chr1	81728274	81728582	AluYRa1	+	12	0	15	1	2	32	3	25	0.914286	3	0.0857143	1
Chr1	81754194	81754500	AluYRa1	+	16	2	22	0.888889	4	12	0	8	1	2	-0.111111	1
Chr1	81769810	81770116	AluYRa1	-	58	2	20	0.966667	4	15	2	36	0.882353	3	0.0843137	1
Chr1	81774337	81774648	AluYRa1	-	61	9	44	0.871429	6	50	1	25	0.980392	4	-0.108964	1
Chr1	81777644	81777964	AluYRa1	-	38	5	37	0.883721	5	58	3	19	0.95082	5	-0.0670987	1
Chr1	81786760	81787066	AluYRa1	-	68	0	40	1	6	60	12	43	0.833333	7	0.166667	1
Chr1	81800163	81800472	AluYRa1	-	11	0	2	1	1	25	0	1	1	2	0	1
Chr1	81807707	81808016	AluYRa1	-	32	0	18	1	4	34	0	13	1	3	0	1
Chr1	81810213	81810524	AluYRa1	+	38	1	21	0.974359	4	37	2	18	0.948718	3	0.025641	1
Chr1	81847029	81847337	AluYRa1	-	22	2	15	0.916667	3	32	2	18	0.941176	4	-0.0245098	1
Chr1	81893955	81894265	AluYRa1	-	49	9	42	0.844828	5	5	0	35	1	2	-0.155172	1
Chr1	81915730	81916038	AluYRa1	-	31	0	22	1	5	15	0	24	1	3	0	1
Chr1	81923957	81924268	AluYRa1	-	85	1	50	0.988372	7	99	2	49	0.980198	7	0.00817407	1
Chr1	81955336	81955647	AluYRa1	-	53	3	27	0.946429	7	26	1	14	0.962963	4	-0.0165344	1
Chr1	81956980	81957285	AluYRa1	-	52	2	39	0.962963	6	15	0	3	1	2	-0.037037	1
Chr1	82053763	82054080	AluYRa1	-	64	0	20	1	4	23	0	19	1	2	0	1
Chr1	82074751	82075055	AluYRa1	-	31	0	15	1	2	56	23	82	0.708861	7	0.291139	1
Chr1	82269526	82269839	AluYRa1	-	17	0	27	1	2	65	0	45	1	5	0	1
Chr1	82441773	82442082	AluYRa1	-	89	2	56	0.978022	7	15	2	25	0.882353	2	0.095669	1
Chr1	82527535	82527856	AluYRa1	-	33	5	25	0.868421	3	57	10	38	0.850746	5	0.0176748	1
Chr1	82554063	82560220	L1_RS2	+	143	28	116	0.836257	8	77	40	85	0.65812	6	0.178138	1
Chr1	82593277	82599422	L1_RS2	-	96	23	94	0.806723	5	53	19	28	0.736111	6	0.0706116	1
Chr1	82680926	82681228	AluYRa1	-	30	4	20	0.882353	3	54	9	27	0.857143	5	0.0252101	1
Chr1	82828856	82829158	AluYRa1	+	68	4	24	0.944444	8	35	1	12	0.972222	4	-0.0277778	1
Chr1	82878773	82879080	AluYRa1	-	43	6	56	0.877551	5	52	4	28	0.928571	4	-0.0510204	1
Chr1	83121423	83121729	AluYRa1	+	19	4	46	0.826087	4	30	2	28	0.9375	3	-0.111413	1
Chr1	83195572	83195878	AluYRa1	+	16	4	25	0.8	5	40	1	29	0.97561	7	-0.17561	1
Chr1	83203802	83204103	AluYRa1	-	42	0	34	1	4	71	2	41	0.972603	6	0.0273973	1
Chr1	83241755	83242057	AluYRa1	+	29	0	13	1	2	9	4	29	0.692308	2	0.307692	1
Chr1	83252084	83252392	AluYRa1	-	67	1	35	0.985294	6	0	0	3	NaN	1	NaN	1
Chr1	83254728	83255040	AluYRa1	+	71	2	53	0.972603	6	3	0	1	1	1	-0.0273973	1
Chr1	83333286	83333600	AluYRa1	-	30	4	71	0.882353	5	27	1	35	0.964286	3	-0.0819328	1
Chr1	83354794	83355096	AluYRa1	-	66	3	48	0.956522	6	2	28	46	0.0666667	4	0.889855	2.26e-14
Chr1	83360479	83360785	AluYRa1	-	53	5	56	0.913793	6	3	45	28	0.0625	4	0.851293	6.97e-16
Chr1	83393284	83393586	AluYRa1	+	49	8	91	0.859649	7	24	10	27	0.705882	3	0.153767	1
Chr1	83427137	83427443	AluYRa1	-	53	5	50	0.913793	6	33	19	56	0.634615	6	0.279178	1
Chr1	83450764	83451071	AluYRa1	-	13	0	4	1	1	57	1	44	0.982759	6	0.0172414	1
Chr1	83460658	83460973	AluYRa1	+	70	3	67	0.958904	7	14	1	13	0.933333	2	0.0255708	1
Chr1	83470753	83471055	AluYRa1	+	27	3	24	0.9	3	49	2	57	0.960784	6	-0.0607843	1
Chr1	83513549	83513854	AluYRa1	+	34	3	27	0.918919	4	34	4	72	0.894737	7	0.0241821	1
Chr1	83514821	83515124	AluYRa1	+	39	3	35	0.928571	7	25	2	28	0.925926	5	0.0026455	1
Chr1	83515980	83516288	AluYRa1	-	44	6	64	0.88	7	32	4	32	0.888889	4	-0.00888889	1
Chr1	83516445	83516753	AluYRa1	-	63	2	82	0.969231	7	50	1	39	0.980392	6	-0.0111614	1
Chr1	83563293	83563611	AluYRa1	+	8	0	13	1	1	63	8	39	0.887324	6	0.112676	1
Chr1	83602244	83602563	AluYRa1	-	29	2	49	0.935484	4	58	5	57	0.920635	6	0.0148489	1
Chr1	83620461	83620771	AluYRa1	-	29	6	48	0.828571	6	24	6	30	0.8	4	0.0285714	1
Chr1	83632496	83632812	AluYRa1	+	11	15	25	0.423077	3	27	2	12	0.931034	3	-0.507958	1
Chr1	83638279	83638590	AluYRa1	+	54	4	45	0.931034	7	37	5	38	0.880952	5	0.0500821	1
Chr1	83645175	83645482	AluYRa1	-	35	3	42	0.921053	4	35	3	22	0.921053	3	0	1
Chr1	83650717	83651046	AluYRa1	-	46	2	9	0.958333	3	69	2	68	0.971831	8	-0.0134977	1
Chr1	83705917	83706218	AluYRa1	-	67	3	91	0.957143	7	27	9	76	0.75	5	0.207143	1
Chr1	83712744	83713052	AluYRa1	+	28	5	9	0.848485	3	31	0	25	1	4	-0.151515	1
Chr1	83725030	83725335	AluYRa1	-	21	1	32	0.954545	3	25	4	25	0.862069	3	0.0924765	1
Chr1	83746609	83746910	AluYRa1	-	9	0	10	1	1	37	6	33	0.860465	4	0.139535	1
Chr1	83756142	83756443	AluYRa1	-	11	0	25	1	2	60	1	47	0.983607	6	0.0163934	1
Chr1	83795146	83795463	AluYRa1	+	24	1	11	0.96	2	52	0	41	1	6	-0.04	1
Chr1	83802871	83803186	AluYRa1	-	59	0	41	1	5	24	0	47	1	4	0	1
Chr1	83809091	83809393	AluYRa1	+	32	3	47	0.914286	6	18	3	43	0.857143	4	0.0571429	1
Chr1	83824061	83824371	AluYRa1	+	0	0	4	NaN	1	53	4	35	0.929825	5	NaN	1
Chr1	83839091	83839397	AluYRa1	+	64	7	41	0.901408	6	36	3	61	0.923077	6	-0.0216685	1
Chr1	83840463	83840765	AluYRa1	-	72	10	58	0.878049	7	22	5	53	0.814815	4	0.063234	1
Chr1	83850926	83851234	AluYRa1	-	6	1	21	0.857143	2	32	2	36	0.941176	5	-0.0840336	1
Chr1	83853392	83853705	AluYRa1	-	5	0	17	1	1	70	0	40	1	5	0	1
Chr1	83865153	83865459	AluYRa1	+	47	2	67	0.959184	8	60	11	39	0.84507	8	0.114113	1
Chr1	83876835	83877146	AluYRa1	+	37	4	33	0.902439	6	68	14	58	0.829268	10	0.0731707	1
Chr1	83882199	83882507	AluYRa1	+	31	0	57	1	4	106	3	55	0.972477	8	0.0275229	1
Chr1	83887818	83888120	AluYRa1	+	31	0	32	1	3	33	0	51	1	4	0	1
Chr1	84021129	84021434	AluYRa1	-	103	3	78	0.971698	8	86	1	28	0.988506	5	-0.0168076	1
Chr1	84065397	84065703	AluYRa1	-	30	4	23	0.882353	3	50	10	28	0.833333	5	0.0490196	1
Chr1	84129952	84130267	AluYRa1	-	40	1	23	0.97561	5	46	1	7	0.978723	3	-0.00311365	1
Chr1	84334552	84334859	AluYRa1	-	37	5	59	0.880952	7	0	0	0	NaN	0	NaN	1
Chr1	84494828	84495134	AluYRa1	+	12	1	11	0.923077	2	27	3	6	0.9	3	0.0230769	1
Chr1	84604210	84604511	AluYRa1	-	57	1	14	0.982759	4	43	0	33	1	5	-0.0172414	1
Chr1	84627845	84628154	AluYRa1	+	31	2	15	0.939394	4	26	1	12	0.962963	3	-0.023569	1
Chr1	84654352	84654659	AluYRa1	-	38	2	52	0.95	6	48	2	40	0.96	5	-0.01	1
Chr1	84693469	84693771	AluYRa1	+	37	0	29	1	3	56	3	29	0.949153	4	0.0508475	1
Chr1	84773826	84774137	AluYRa1	+	25	3	41	0.892857	3	15	0	8	1	1	-0.107143	1
Chr1	84831759	84832072	AluYRa1	-	45	15	49	0.75	7	72	3	48	0.96	8	-0.21	1
Chr1	84834535	84834848	AluYRa1	+	27	1	48	0.964286	4	67	1	27	0.985294	5	-0.0210084	1
Chr1	84868852	84869160	AluYRa1	-	22	5	53	0.814815	4	3	1	36	0.75	2	0.0648148	1
Chr1	84879028	84879334	AluYRa1	-	34	0	17	1	3	24	0	10	1	2	0	1
Chr1	84962105	84962435	AluYRa1	-	42	1	20	0.976744	3	28	1	13	0.965517	2	0.0112269	1
Chr1	85046491	85046812	AluYRa1	+	36	18	30	0.666667	4	15	25	44	0.375	4	0.291667	1
Chr1	85144582	85144883	AluYRa1	+	42	0	18	1	4	68	10	18	0.871795	8	0.128205	1
Chr1	85220170	85220476	AluYRa1	+	10	0	10	1	1	58	9	73	0.865672	7	0.134328	1
Chr1	85255890	85256197	AluYRa1	+	15	5	10	0.75	2	41	8	21	0.836735	5	-0.0867347	1
Chr1	85300313	85300620	AluYRa1	-	19	1	34	0.95	9	21	1	26	0.954545	8	-0.00454546	1
Chr1	85420360	85420661	AluYRa1	-	37	2	21	0.948718	3	45	10	42	0.818182	5	0.130536	1
Chr1	85707256	85707566	AluYRa1	+	18	6	12	0.75	3	51	22	71	0.69863	9	0.0513699	1
Chr1	85708600	85708904	AluYRa1	-	6	1	44	0.857143	3	44	5	86	0.897959	9	-0.0408163	1
Chr1	85715513	85715821	AluYRa1	+	11	1	18	0.916667	2	27	1	17	0.964286	3	-0.047619	1
Chr1	85745817	85746118	AluYRa1	-	37	12	17	0.755102	6	23	0	10	1	3	-0.244898	1
Chr1	85780020	85780331	AluYRa1	+	47	3	22	0.94	4	33	1	20	0.970588	3	-0.0305882	1
Chr1	85798787	85799098	AluYRa1	-	39	1	28	0.975	4	51	3	48	0.944444	6	0.0305556	1
Chr1	85995371	85995681	AluYRa1	-	8	1	42	0.888889	5	27	0	15	1	2	-0.111111	1
Chr1	86216076	86216384	AluYRa1	-	36	7	50	0.837209	6	24	0	12	1	2	-0.162791	1
Chr1	86232582	86232891	AluYRa1	-	24	5	51	0.827586	5	22	6	40	0.785714	5	0.0418719	1
Chr1	86422556	86422858	AluYRa1	+	23	13	43	0.638889	7	18	6	12	0.75	3	-0.111111	1
Chr1	86470650	86470959	AluYRa1	+	20	16	16	0.555556	4	11	27	20	0.289474	5	0.266082	1
Chr1	87811647	87811951	AluYRa1	+	21	2	7	0.913043	2	14	9	37	0.608696	4	0.304348	1
Chr1	87826457	87826765	AluYRa1	+	51	16	35	0.761194	6	7	31	13	0.184211	3	0.576984	1
Chr1	87874512	87874825	AluYRa1	-	17	7	18	0.708333	5	20	8	32	0.714286	5	-0.00595238	1
Chr1	88054814	88060990	L1_RS2	+	15	16	24	0.483871	2	47	41	49	0.534091	5	-0.0502199	1
Chr1	88198069	88204121	L1PA5	-	134	43	66	0.757062	10	88	11	41	0.888889	6	-0.131827	1
Chr1	88206271	88206580	AluYRa1	+	35	6	19	0.853659	3	54	2	28	0.964286	4	-0.110627	1
Chr1	88334758	88335061	AluYRa1	+	19	0	11	1	2	32	2	11	0.941176	3	0.0588235	1
Chr1	88376025	88376333	AluYRa1	-	26	0	8	1	2	33	3	32	0.916667	4	0.0833333	1
Chr1	88401117	88401429	AluYRa1	+	11	0	4	1	1	9	3	3	0.75	1	0.25	1
Chr1	88427407	88427714	AluYRa1	-	0	0	6	NaN	2	18	1	21	0.947368	2	NaN	1
Chr1	88465585	88465897	AluYRa1	+	15	7	22	0.681818	3	19	0	27	1	3	-0.318182	1
Chr1	88508131	88508432	AluYRa1	+	33	2	26	0.942857	4	61	5	46	0.924242	7	0.0186147	1
Chr1	88526637	88526943	AluYRa1	-	46	9	45	0.836364	5	28	4	28	0.875	3	-0.0386364	1
Chr1	88536390	88536698	AluYRa1	-	22	0	18	1	2	19	0	1	1	1	0	1
Chr1	88567948	88568256	AluYRa1	+	19	4	48	0.826087	5	18	11	21	0.62069	4	0.205397	1
Chr1	88568994	88569303	AluYRa1	-	21	5	39	0.807692	4	31	3	38	0.911765	4	-0.104072	1
Chr1	88589361	88589674	AluYRa1	-	32	0	16	1	4	33	4	39	0.891892	4	0.108108	1
Chr1	88664416	88664724	AluYRa1	-	33	14	16	0.702128	3	24	4	14	0.857143	2	-0.155015	1
Chr1	88678372	88678677	AluYRa1	+	62	2	26	0.96875	5	68	7	51	0.906667	7	0.0620833	1
Chr1	88828577	88834743	L1_RS2	+	137	28	102	0.830303	5	50	7	34	0.877193	2	-0.04689	1
Chr1	88858242	88858553	AluYRa1	+	33	0	36	1	3	38	0	54	1	4	0	1
Chr1	88905212	88905513	AluYRa1	+	24	3	54	0.888889	8	18	14	23	0.5625	5	0.326389	1
Chr1	88936595	88936911	AluYRa1	+	54	5	9	0.915254	4	107	6	87	0.946903	10	-0.0316484	1
Chr1	89183821	89184132	AluYRa1	+	72	14	74	0.837209	8	45	4	45	0.918367	5	-0.081158	1
Chr1	89187800	89188109	AluYRa1	+	0	0	0	NaN	0	16	0	5	1	1	NaN	1
Chr1	89196841	89197143	AluYRa1	+	8	0	10	1	1	32	2	38	0.941176	4	0.0588235	1
Chr1	89207534	89207839	AluYRa1	-	9	9	28	0.5	3	39	0	7	1	3	-0.5	1
Chr1	89216151	89216455	AluYRa1	+	17	8	15	0.68	2	75	3	42	0.961538	6	-0.281538	1
Chr1	89219662	89219967	AluYRa1	-	9	4	27	0.692308	2	72	14	71	0.837209	8	-0.144902	1
Chr1	89233086	89233389	AluYRa1	+	16	4	16	0.8	2	22	2	12	0.916667	2	-0.116667	1
Chr1	89233539	89233848	AluYRa1	+	41	3	15	0.931818	3	27	0	14	1	2	-0.0681818	1
Chr1	89252219	89252522	AluYRa1	-	15	1	5	0.9375	1	54	0	30	1	4	-0.0625	1
Chr1	89253100	89253408	AluYRa1	+	31	4	25	0.885714	3	24	4	32	0.857143	3	0.0285714	1
Chr1	89265879	89266184	AluYRa1	-	2	7	10	0.222222	1	16	21	39	0.432432	4	-0.21021	1
Chr1	89304269	89304583	AluYRa1	-	27	5	19	0.84375	4	24	2	34	0.923077	5	-0.0793269	1
Chr1	89311014	89311329	AluYRa1	-	14	3	17	0.823529	2	40	3	8	0.930233	3	-0.106703	1
Chr1	89319606	89319915	AluYRa1	+	45	3	28	0.9375	4	50	5	59	0.909091	6	0.0284091	1
Chr1	89354039	89354344	AluYRa1	-	22	2	17	0.916667	3	47	0	17	1	4	-0.0833333	1
Chr1	89355494	89355811	AluYRa1	-	11	1	29	0.916667	3	35	7	18	0.833333	4	0.0833333	1
Chr1	89367807	89368114	AluYRa1	-	48	2	14	0.96	4	54	3	56	0.947368	6	0.0126316	1
Chr1	89391772	89392081	AluYRa1	-	30	3	51	0.909091	6	46	1	39	0.978723	7	-0.0696325	1
Chr1	89413374	89413679	AluYRa1	+	28	2	6	0.933333	2	59	8	41	0.880597	6	0.0527363	1
Chr1	89417776	89418083	AluYRa1	+	5	4	40	0.555556	4	28	0	20	1	3	-0.444444	1
Chr1	89432119	89432427	AluYRa1	+	31	2	33	0.939394	4	45	4	44	0.918367	5	0.0210266	1
Chr1	89440228	89440532	AluYRa1	+	36	1	5	0.972973	2	34	3	11	0.918919	3	0.0540541	1
Chr1	89442163	89442470	AluYRa1	-	31	1	4	0.96875	3	42	6	12	0.875	5	0.09375	1
Chr1	89544248	89544555	AluYRa1	+	0	0	0	NaN	0	16	2	20	0.888889	2	NaN	1
Chr1	89545042	89545343	AluYRa1	+	0	1	12	0	1	30	0	19	1	3	-1	1
Chr1	89557753	89558059	AluYRa1	-	50	1	25	0.980392	4	44	13	45	0.77193	6	0.208462	1
Chr1	89563326	89563629	AluYRa1	+	42	3	35	0.933333	4	65	5	50	0.928571	6	0.0047619	1
Chr1	89630182	89630507	AluYRa1	+	32	2	18	0.941176	4	56	1	14	0.982456	6	-0.0412797	1
Chr1	89657764	89658075	AluYRa1	-	0	0	0	NaN	0	44	6	90	0.88	7	NaN	1
Chr1	89682562	89682871	AluYRa1	+	13	1	16	0.928571	2	12	1	17	0.923077	2	0.00549451	1
Chr1	89711777	89712080	AluYRa1	-	10	0	3	1	1	8	7	11	0.533333	2	0.466667	1
Chr1	89746373	89746679	AluYRa1	+	25	2	32	0.925926	3	47	1	11	0.979167	3	-0.0532407	1
Chr1	89771353	89771658	AluYRa1	+	57	2	13	0.966102	4	94	5	27	0.949495	7	0.0166067	1
Chr1	89772383	89772687	AluYRa1	-	21	1	27	0.954545	4	55	3	82	0.948276	8	0.00626959	1
Chr1	89778722	89779030	AluYRa1	-	33	10	52	0.767442	5	19	0	27	1	3	-0.232558	1
Chr1	89804160	89804464	AluYRa1	-	13	3	29	0.8125	3	39	7	14	0.847826	4	-0.0353261	1
Chr1	89839225	89839536	AluYRa1	-	39	2	19	0.95122	3	36	2	22	0.947368	3	0.00385109	1
Chr1	89853029	89853358	AluYRa1	-	27	0	13	1	2	81	4	49	0.952941	7	0.0470588	1
Chr1	89870351	89870653	AluYRa1	-	32	2	49	0.941176	6	23	3	47	0.884615	5	0.0565611	1
Chr1	89906314	89906635	AluYRa1	-	30	0	33	1	4	41	19	43	0.683333	6	0.316667	1
Chr1	89924820	89925129	AluYRa1	+	45	4	11	0.918367	3	41	5	54	0.891304	5	0.027063	1
Chr1	89930570	89930873	AluYRa1	-	14	2	44	0.875	3	31	13	56	0.704545	5	0.170455	1
Chr1	89941826	89942135	AluYRa1	-	18	6	16	0.75	4	29	2	18	0.935484	4	-0.185484	1
Chr1	89987484	89987800	AluYRa1	-	20	0	20	1	2	53	1	26	0.981481	4	0.0185185	1
Chr1	90180423	90180731	AluYRa1	-	22	1	40	0.956522	3	41	22	21	0.650794	4	0.305728	1
Chr1	90202071	90202374	AluYRa1	-	12	0	10	1	1	13	3	6	0.8125	1	0.1875	1
Chr1	90344542	90344852	AluYRa1	-	53	12	54	0.815385	7	16	4	31	0.8	3	0.0153846	1
Chr1	90348006	90354153	L1_RS2	-	36	15	27	0.705882	6	5	6	7	0.454545	2	0.251337	1
Chr1	90403364	90409513	L1_RS2	+	7	0	14	1	2	178	80	140	0.689922	9	0.310078	1
Chr1	90428556	90428865	AluYRa1	-	0	0	0	NaN	0	7	8	17	0.466667	2	NaN	1
Chr1	90444992	90445301	AluYRa1	-	13	1	24	0.928571	3	54	15	43	0.782609	7	0.145963	1
Chr1	90510119	90510420	AluYRa1	+	45	3	45	0.9375	5	55	0	47	1	5	-0.0625	1
Chr1	90549934	90550239	AluYRa1	+	33	4	39	0.891892	6	32	8	12	0.8	4	0.0918919	1
Chr1	90614324	90614625	AluYRa1	+	54	1	17	0.981818	4	31	1	40	0.96875	4	0.0130682	1
Chr1	90628231	90628537	AluYRa1	-	33	0	21	1	3	24	6	39	0.8	4	0.2	1
Chr1	90680063	90680368	AluYRa1	-	6	1	11	0.857143	1	60	2	10	0.967742	4	-0.110599	1
Chr1	90804902	90805210	AluYRa1	-	8	1	21	0.888889	2	29	4	27	0.878788	4	0.010101	1
Chr1	90953748	90954053	AluYRa1	+	21	0	47	1	4	30	0	21	1	3	0	1
Chr1	91060003	91060311	AluYRa1	-	16	0	18	1	2	21	0	30	1	3	0	1
Chr1	91177714	91178020	AluYRa1	-	32	1	9	0.969697	3	58	0	12	1	5	-0.030303	1
Chr1	91218917	91219221	AluYRa1	-	26	1	36	0.962963	3	42	0	63	1	5	-0.037037	1
Chr1	91340381	91340690	AluYRa1	+	36	4	40	0.9	4	54	15	58	0.782609	7	0.117391	1
Chr1	91357724	91358033	AluYRa1	-	41	0	48	1	5	46	7	47	0.867925	5	0.132075	1
Chr1	91431548	91437707	L1_RS2	+	48	24	24	0.666667	5	129	42	238	0.754386	9	-0.0877193	1
Chr1	91487393	91493554	L1_RS2	-	50	10	54	0.833333	5	163	39	76	0.806931	6	0.0264026	1
Chr1	91575227	91575535	AluYRa1	-	50	4	36	0.925926	5	27	9	54	0.75	5	0.175926	1
Chr1	91732851	91733156	AluYRa1	+	6	2	16	0.75	2	23	23	50	0.5	8	0.25	1
Chr1	91922038	91922345	AluYRa1	+	39	0	5	1	2	29	0	15	1	2	0	1
Chr1	92061348	92061657	AluYRa1	+	0	0	0	NaN	0	41	9	55	0.82	5	NaN	1
Chr1	92084788	92085092	AluYRa1	-	7	1	25	0.875	3	51	7	30	0.87931	8	-0.00431035	1
Chr1	92204948	92205258	AluYRa1	-	31	6	25	0.837838	7	16	6	8	0.727273	3	0.110565	1
Chr1	92290440	92290749	AluYRa1	+	73	1	15	0.986486	5	69	7	44	0.907895	6	0.0785917	1
Chr1	92328394	92328701	AluYRa1	-	20	9	25	0.689655	3	55	5	66	0.916667	7	-0.227011	1
Chr1	92328798	92329101	AluYRa1	+	25	2	15	0.925926	4	42	7	33	0.857143	7	0.0687831	1
Chr1	92388502	92388806	AluYRa1	-	7	2	7	0.777778	1	45	10	73	0.818182	8	-0.040404	1
Chr1	92437267	92443413	L1_RS2	-	40	11	28	0.784314	2	116	42	75	0.734177	6	0.0501365	1
Chr1	92468968	92475116	L1_RS2	-	55	15	43	0.785714	3	277	132	186	0.677262	15	0.108453	1
Chr1	92509912	92510227	AluYRa1	+	30	6	27	0.833333	3	66	7	20	0.90411	5	-0.0707763	1
Chr1	92612345	92618472	L1_RS2	-	0	0	0	NaN	0	61	13	57	0.824324	6	NaN	1
Chr1	92632326	92632634	AluYRa1	-	11	2	5	0.846154	2	6	2	10	0.75	2	0.0961538	1
Chr1	92822811	92823115	AluYRa1	+	24	3	27	0.888889	3	70	6	86	0.921053	9	-0.0321637	1
Chr1	92874484	92874803	AluYRa1	-	10	2	5	0.833333	1	21	0	30	1	3	-0.166667	1
Chr1	93137942	93138246	AluYRa1	-	49	7	19	0.875	5	68	8	71	0.894737	11	-0.0197368	1
Chr1	93177647	93177955	AluYRa1	+	28	3	8	0.903226	3	17	4	5	0.809524	2	0.093702	1
Chr1	93411593	93411909	AluYRa1	+	47	2	11	0.959184	4	25	5	20	0.833333	4	0.12585	1
Chr1	93455318	93455628	AluYRa1	+	38	1	18	0.974359	3	68	3	88	0.957746	9	0.0166125	1
Chr1	93895879	93896186	AluYRa1	-	11	0	5	1	1	24	2	40	0.923077	5	0.0769231	1
Chr1	94081425	94081728	AluYRa1	+	3	2	52	0.6	3	52	10	33	0.83871	5	-0.23871	1
Chr1	94082416	94082722	AluYRa1	-	21	2	28	0.913043	3	66	10	26	0.868421	6	0.0446224	1
Chr1	94128884	94129197	AluYRa1	+	21	2	29	0.913043	4	45	12	34	0.789474	7	0.12357	1
Chr1	94170517	94170820	AluYRa1	+	40	0	24	1	4	68	1	27	0.985507	6	0.0144928	1
Chr1	94225497	94225801	AluYRa1	+	12	2	6	0.857143	1	32	5	23	0.864865	3	-0.00772201	1
Chr1	94251156	94251463	AluYRa1	+	43	4	64	0.914894	6	63	7	63	0.9	7	0.0148936	1
Chr1	94287119	94287427	AluYRa1	-	14	37	71	0.27451	6	16	18	58	0.470588	4	-0.196078	1
Chr1	94337163	94337466	AluYRa1	+	58	18	44	0.763158	6	65	19	36	0.77381	6	-0.0106516	1
Chr1	94358189	94358499	AluYRa1	-	0	0	0	NaN	0	13	21	44	0.382353	4	NaN	1
Chr1	94379302	94379604	AluYRa1	-	17	3	6	0.85	2	40	7	44	0.851064	7	-0.00106383	1
Chr1	94395309	94395620	AluYRa1	-	5	8	6	0.384615	1	18	23	35	0.439024	4	-0.054409	1
Chr1	94496016	94496322	AluYRa1	-	71	7	24	0.910256	6	28	6	17	0.823529	3	0.086727	1
Chr1	94518099	94518405	AluYRa1	+	14	0	20	1	2	53	11	55	0.828125	7	0.171875	1
Chr1	94518589	94518895	AluYRa1	-	7	1	43	0.875	3	73	3	50	0.960526	6	-0.0855263	1
Chr1	94521510	94521814	AluYRa1	-	31	3	33	0.911765	4	16	3	21	0.842105	2	0.0696594	1
Chr1	94571878	94572183	AluYRa1	+	18	0	3	1	1	33	2	28	0.942857	3	0.0571429	1
Chr1	94578517	94578825	AluYRa1	-	5	0	16	1	1	26	1	54	0.962963	4	0.037037	1
Chr1	94600515	94600824	AluYRa1	+	24	1	33	0.96	4	12	3	21	0.8	2	0.16	1
Chr1	94605102	94605419	AluYRa1	+	25	8	43	0.757576	4	15	19	42	0.441176	4	0.316399	1
Chr1	94608047	94608355	AluYRa1	+	24	2	16	0.923077	2	19	1	1	0.95	1	-0.0269231	1
Chr1	94616374	94616680	AluYRa1	-	33	0	10	1	3	63	1	50	0.984375	6	0.015625	1
Chr1	94617157	94617465	AluYRa1	+	24	1	21	0.96	2	43	1	94	0.977273	6	-0.0172727	1
Chr1	94624502	94624822	AluYRa1	+	16	3	23	0.842105	3	34	1	21	0.971429	4	-0.129323	1
Chr1	94632946	94633249	AluYRa1	+	32	0	28	1	4	85	1	64	0.988372	10	0.0116279	1
Chr1	94637400	94637707	AluYRa1	-	71	9	67	0.8875	8	44	5	35	0.897959	4	-0.0104592	1
Chr1	94642965	94643276	AluYRa1	+	46	7	42	0.867925	5	16	3	0	0.842105	1	0.0258193	1
Chr1	94661134	94661443	AluYRa1	+	78	10	26	0.886364	6	42	6	9	0.875	3	0.0113636	1
Chr1	94663620	94663929	AluYRa1	+	51	1	36	0.980769	4	52	7	46	0.881356	5	0.0994133	1
Chr1	94667208	94667513	AluYRa1	+	53	3	105	0.946429	7	32	1	16	0.969697	3	-0.0232684	1
Chr1	94676864	94677174	AluYRa1	+	35	1	24	0.972222	3	91	6	53	0.938144	8	0.0340779	1
Chr1	94679329	94679642	AluYRa1	+	26	2	37	0.928571	4	109	3	68	0.973214	9	-0.0446429	1
Chr1	94704219	94704523	AluYRa1	-	42	3	50	0.933333	5	28	13	16	0.682927	3	0.250407	1
Chr1	94704809	94705112	AluYRa1	+	53	1	34	0.981481	5	17	2	51	0.894737	4	0.0867446	1
Chr1	94731133	94731442	AluYRa1	+	44	5	61	0.897959	5	61	3	24	0.953125	4	-0.0551658	1
Chr1	94738273	94738581	AluYRa1	+	14	1	3	0.933333	1	34	4	29	0.894737	4	0.0385965	1
Chr1	94744063	94744377	AluYRa1	-	11	0	10	1	1	7	4	13	0.636364	2	0.363636	1
Chr1	94754863	94755171	AluYRa1	+	18	0	20	1	2	40	0	17	1	3	0	1
Chr1	94769312	94769623	AluYRa1	+	12	6	54	0.666667	4	44	1	52	0.977778	6	-0.311111	1
Chr1	94800662	94800972	AluYRa1	-	36	3	21	0.923077	4	48	1	56	0.979592	7	-0.0565149	1
Chr1	94866990	94867291	AluYRa1	+	11	10	11	0.52381	2	58	6	48	0.90625	7	-0.38244	1
Chr1	94874288	94874599	AluYRa1	+	14	5	21	0.736842	2	9	9	22	0.5	2	0.236842	1
Chr1	94885047	94885349	AluYRa1	-	24	8	34	0.75	3	0	0	0	NaN	0	NaN	1
Chr1	94934480	94934790	AluYRa1	-	48	3	52	0.941176	6	10	0	8	1	1	-0.0588235	1
Chr1	94940936	94941247	AluYRa1	+	47	0	13	1	3	35	1	44	0.972222	4	0.0277778	1
Chr1	94944177	94944481	AluYRa1	+	40	9	54	0.816327	5	42	4	52	0.913043	5	-0.0967169	1
Chr1	94948581	94948910	AluYRa1	-	33	2	79	0.942857	6	30	5	117	0.857143	8	0.0857143	1
Chr1	94962355	94962664	AluYRa1	-	4	2	19	0.666667	2	20	3	21	0.869565	3	-0.202899	1
Chr1	94977740	94978043	AluYRa1	+	41	7	36	0.854167	4	16	6	20	0.727273	2	0.126894	1
Chr1	94987810	94988115	AluYRa1	+	43	2	9	0.955556	3	15	1	50	0.9375	4	0.0180556	1
Chr1	94989079	94989382	AluYRa1	-	25	3	83	0.892857	6	0	15	23	0	2	0.892857	1
Chr1	94999401	94999709	AluYRa1	-	25	0	43	1	4	69	0	64	1	7	0	1
Chr1	95028572	95028881	AluYRa1	+	8	9	28	0.470588	3	9	1	24	0.9	2	-0.429412	1
Chr1	95033053	95033361	AluYRa1	+	7	0	10	1	1	34	6	28	0.85	4	0.15	1
Chr1	95052776	95053085	AluYRa1	+	15	1	5	0.9375	1	46	3	75	0.938776	6	-0.00127551	1
Chr1	95055920	95056231	AluYRa1	+	38	1	24	0.974359	3	84	22	83	0.792453	9	0.181906	1
Chr1	95062087	95062396	AluYRa1	-	4	1	35	0.8	3	7	1	14	0.875	2	-0.075	1
Chr1	95098259	95098561	AluYRa1	+	36	5	67	0.878049	6	11	0	25	1	2	-0.121951	1
Chr1	95107565	95107888	AluYRa1	-	30	4	34	0.882353	4	34	1	26	0.971429	4	-0.0890756	1
Chr1	95110225	95110536	AluYRa1	-	16	4	52	0.8	4	44	5	23	0.897959	4	-0.0979592	1
Chr1	95118475	95118782	AluYRa1	-	29	2	7	0.935484	2	35	0	22	1	3	-0.0645161	1
Chr1	95125064	95125366	AluYRa1	+	3	5	62	0.375	4	22	0	21	1	3	-0.625	1
Chr1	95125463	95125781	AluYRa1	-	18	11	47	0.62069	4	0	1	18	0	1	0.62069	1
Chr1	95141777	95142078	AluYRa1	-	0	1	20	0	1	5	47	23	0.0961538	4	-0.0961538	1
Chr1	95175453	95175758	AluYRa1	-	76	1	35	0.987013	7	48	0	20	1	4	-0.012987	1
Chr1	95179453	95179757	AluYRa1	-	63	6	34	0.913043	7	43	4	15	0.914894	4	-0.00185014	1
Chr1	95197030	95197339	AluYRa1	-	6	0	12	1	1	35	1	18	0.972222	3	0.0277778	1
Chr1	95208597	95208906	AluYRa1	-	35	0	31	1	3	39	2	25	0.95122	3	0.0487805	1
Chr1	95224242	95224586	AluYRa1	-	34	3	33	0.918919	5	45	7	46	0.865385	7	0.0535343	1
Chr1	95225749	95226056	AluYRa1	-	62	1	25	0.984127	6	105	1	50	0.990566	10	-0.00643905	1
Chr1	95264541	95264849	AluYRa1	-	35	11	38	0.76087	4	52	15	101	0.776119	8	-0.0152498	1
Chr1	95271374	95271682	AluYRa1	-	51	7	42	0.87931	5	44	8	28	0.846154	4	0.0331565	1
Chr1	95276826	95277130	AluYRa1	-	32	0	34	1	3	64	5	63	0.927536	6	0.0724638	1
Chr1	95295864	95296168	AluYRa1	-	0	6	1	0	1	17	1	3	0.944444	2	-0.944444	1
Chr1	95303717	95304033	AluYRa1	+	18	0	27	1	3	35	2	20	0.945946	3	0.0540541	1
Chr1	95305816	95306127	AluYRa1	-	1	3	65	0.25	3	8	0	15	1	1	-0.75	1
Chr1	95306479	95306782	AluYRa1	+	20	3	31	0.869565	3	18	0	0	1	1	-0.130435	1
Chr1	95320880	95321185	AluYRa1	+	32	0	12	1	2	26	4	50	0.866667	5	0.133333	1
Chr1	95324649	95324956	AluYRa1	-	48	9	69	0.842105	7	28	3	41	0.903226	4	-0.0611205	1
Chr1	95354246	95354560	AluYRa1	-	24	4	58	0.857143	5	11	6	54	0.647059	5	0.210084	1
Chr1	95370887	95371188	AluYRa1	+	6	2	30	0.75	2	33	31	50	0.515625	6	0.234375	1
Chr1	95378245	95378558	AluYRa1	+	39	2	62	0.95122	6	66	1	33	0.985075	5	-0.0338551	1
Chr1	95397429	95397733	AluYRa1	-	65	6	61	0.915493	6	70	4	36	0.945946	5	-0.030453	1
Chr1	95411366	95411676	AluYRa1	+	22	0	26	1	4	30	0	30	1	5	0	1
Chr1	95416437	95416738	AluYRa1	+	17	0	29	1	2	57	14	67	0.802817	6	0.197183	1
Chr1	95424443	95424749	AluYRa1	-	39	1	28	0.975	4	72	15	32	0.827586	7	0.147414	1
Chr1	95425314	95425617	AluYRa1	-	20	0	33	1	3	105	0	46	1	8	0	1
Chr1	95427925	95428233	AluYRa1	+	25	1	14	0.961538	2	54	6	60	0.9	6	0.0615385	1
Chr1	95429684	95429987	AluYRa1	-	52	1	19	0.981132	4	58	11	21	0.84058	5	0.140552	1
Chr1	95430818	95431127	AluYRa1	-	16	0	22	1	2	44	5	27	0.897959	4	0.102041	1
Chr1	95440143	95440454	AluYRa1	+	20	0	3	1	1	64	3	48	0.955224	5	0.0447761	1
Chr1	95441260	95441568	AluYRa1	-	12	1	5	0.923077	1	28	1	43	0.965517	4	-0.0424403	1
Chr1	95449837	95450148	AluYRa1	+	15	9	52	0.625	4	2	1	16	0.666667	1	-0.0416667	1
Chr1	95467666	95467967	AluYRa1	-	11	0	8	1	1	47	3	48	0.94	6	0.06	1
Chr1	95470291	95470607	AluYRa1	-	10	0	18	1	2	45	2	41	0.957447	5	0.0425532	1
Chr1	95472880	95473183	AluYRa1	-	19	6	15	0.76	2	39	4	77	0.906977	6	-0.146977	1
Chr1	95477131	95477447	AluYRa1	-	101	8	71	0.926606	9	60	1	59	0.983607	6	-0.0570011	1
Chr1	95482180	95482492	AluYRa1	+	35	3	38	0.921053	4	69	7	28	0.907895	6	0.0131579	1
Chr1	95486356	95486666	AluYRa1	-	35	1	71	0.972222	5	85	2	23	0.977011	5	-0.00478927	1
Chr1	95489459	95489776	AluYRa1	+	16	0	22	1	2	53	0	42	1	5	0	1
Chr1	95507933	95508244	AluYRa1	+	61	4	40	0.938462	5	51	5	56	0.910714	6	0.0277473	1
Chr1	95514290	95514596	AluYRa1	+	1	0	18	1	1	44	15	36	0.745763	5	0.254237	1
Chr1	95518341	95518673	AluYRa1	-	33	2	16	0.942857	3	37	4	39	0.902439	5	0.0404181	1
Chr1	95525407	95525720	AluYRa1	-	56	5	53	0.918033	6	65	2	73	0.970149	7	-0.0521165	1
Chr1	95574539	95574848	AluYRa1	+	33	5	41	0.868421	8	5	0	17	1	2	-0.131579	1
Chr1	95598968	95599279	AluYRa1	-	50	2	38	0.961538	5	46	0	26	1	4	-0.0384615	1
Chr1	95616301	95616602	AluYRa1	-	7	0	5	1	1	5	0	7	1	1	0	1
Chr1	95633545	95633846	AluYRa1	-	44	1	26	0.977778	5	36	11	28	0.765957	5	0.21182	1
Chr1	95635865	95636170	AluYRa1	-	45	0	60	1	5	28	7	35	0.8	4	0.2	1
Chr1	95654029	95654336	AluYRa1	-	18	0	30	1	3	36	0	4	1	2	0	1
Chr1	95664628	95664938	AluYRa1	+	20	3	36	0.869565	4	64	9	52	0.876712	8	-0.00714711	1
Chr1	95693052	95693358	AluYRa1	-	14	7	43	0.666667	4	14	2	32	0.875	3	-0.208333	1
Chr1	95698093	95698400	AluYRa1	+	63	1	11	0.984375	5	16	6	38	0.727273	4	0.257102	1
Chr1	95701712	95702014	AluYRa1	+	46	3	38	0.938776	5	33	8	85	0.804878	6	0.133897	1
Chr1	95702611	95702916	AluYRa1	-	34	2	44	0.944444	4	15	34	68	0.306122	7	0.638322	6.41e-05
Chr1	95720075	95720384	AluYRa1	+	17	4	29	0.809524	3	28	9	48	0.756757	5	0.0527671	1
Chr1	95721474	95721779	AluYRa1	-	10	0	21	1	4	13	1	22	0.928571	4	0.0714286	1
Chr1	95742264	95742569	AluYRa1	-	8	2	16	0.8	2	18	0	24	1	4	-0.2	1
Chr1	95749375	95749682	AluYRa1	-	15	1	29	0.9375	3	5	0	10	1	1	-0.0625	1
Chr1	95769392	95769697	AluYRa1	-	70	5	45	0.933333	6	80	6	34	0.930233	6	0.00310078	1
Chr1	95778924	95779234	AluYRa1	+	56	2	38	0.965517	6	33	0	15	1	3	-0.0344828	1
Chr1	95798762	95799066	AluYRa1	+	27	0	30	1	4	20	0	34	1	3	0	1
Chr1	95805427	95805729	AluYRa1	+	6	0	4	1	1	36	0	36	1	8	0	1
Chr1	95824383	95824701	AluYRa1	-	64	9	50	0.876712	6	117	9	85	0.928571	10	-0.0518591	1
Chr1	95826365	95826673	AluYRa1	+	64	3	53	0.955224	6	65	1	74	0.984848	7	-0.0296246	1
Chr1	95854559	95854866	AluYRa1	-	13	23	61	0.361111	5	88	52	91	0.628571	12	-0.26746	1
Chr1	95874347	95874656	AluYRa1	-	12	8	10	0.6	2	12	2	31	0.857143	3	-0.257143	1
Chr1	95884597	95884906	AluYRa1	+	16	1	29	0.941176	3	24	2	17	0.923077	3	0.0180995	1
Chr1	95886638	95886945	AluYRa1	-	0	1	41	0	2	40	3	41	0.930233	4	-0.930233	1
Chr1	95906964	95907266	AluYRa1	-	8	3	15	0.727273	2	19	18	15	0.513514	4	0.213759	1
Chr1	95939799	95940100	AluYRa1	+	25	1	46	0.961538	4	38	7	56	0.844444	6	0.117094	1
Chr1	95940461	95940765	AluYRa1	+	28	6	34	0.823529	4	33	4	48	0.891892	5	-0.0683625	1
Chr1	95955695	95956007	AluYRa1	-	26	0	25	1	3	39	4	25	0.906977	4	0.0930233	1
Chr1	95965878	95966186	AluYRa1	-	26	4	27	0.866667	4	29	4	21	0.878788	3	-0.0121212	1
Chr1	95996718	95997025	AluYRa1	+	40	5	20	0.888889	4	11	10	15	0.52381	2	0.365079	1
Chr1	96004801	96005108	AluYRa1	-	12	13	26	0.48	3	31	2	69	0.939394	6	-0.459394	1
Chr1	96021095	96021396	AluYRa1	-	13	1	43	0.928571	3	11	1	26	0.916667	2	0.0119048	1
Chr1	96100901	96101209	AluYRa1	-	33	2	41	0.942857	4	49	0	94	1	8	-0.0571429	1
Chr1	96114773	96115082	AluYRa1	-	28	3	5	0.903226	2	12	0	6	1	1	-0.0967742	1
Chr1	96116105	96116414	AluYRa1	-	24	1	11	0.96	2	14	1	3	0.933333	1	0.0266667	1
Chr1	96159091	96159416	AluYRa1	-	14	1	31	0.933333	2	47	2	20	0.959184	3	-0.0258503	1
Chr1	96240854	96241162	AluYRa1	-	26	1	33	0.962963	3	31	21	67	0.596154	7	0.366809	1
Chr1	96241982	96242298	AluYRa1	-	18	0	24	1	2	33	5	46	0.868421	4	0.131579	1
Chr1	96244969	96245270	AluYRa1	-	17	1	0	0.944444	1	39	1	32	0.975	4	-0.0305556	1
Chr1	96391077	96391384	AluYRa1	-	16	1	52	0.941176	3	123	5	87	0.960938	10	-0.019761	1
Chr1	96465340	96465646	AluYRa1	+	36	1	47	0.972973	4	42	2	82	0.954545	6	0.0184275	1
Chr1	96465647	96465949	AluYRa1	+	29	6	44	0.828571	4	58	12	38	0.828571	6	0	1
Chr1	96507582	96507888	AluYRa1	+	63	3	36	0.954545	6	79	4	51	0.951807	7	0.00273823	1
Chr1	96622855	96623156	AluYRa1	-	19	2	36	0.904762	3	2	7	29	0.222222	2	0.68254	1
Chr1	96673716	96674022	AluYRa1	+	45	7	100	0.865385	8	4	0	15	1	1	-0.134615	1
Chr1	96678324	96678628	AluYRa1	+	19	0	29	1	3	17	2	18	0.894737	3	0.105263	1
Chr1	96703469	96703778	AluYRa1	+	44	1	58	0.977778	6	55	1	40	0.982143	5	-0.00436508	1
Chr1	96727240	96727552	AluYRa1	-	89	5	32	0.946809	6	37	0	26	1	3	-0.0531915	1
Chr1	96734327	96734636	AluYRa1	-	7	1	19	0.875	3	20	3	43	0.869565	4	0.00543478	1
Chr1	96746633	96746949	AluYRa1	-	12	5	28	0.705882	3	7	4	50	0.636364	5	0.0695187	1
Chr1	96757691	96757994	AluYRa1	-	47	4	19	0.921569	5	49	1	20	0.98	5	-0.0584314	1
Chr1	96793066	96793376	AluYRa1	-	34	1	22	0.971429	3	0	0	3	NaN	1	NaN	1
Chr1	96795971	96796280	AluYRa1	+	32	0	25	1	3	44	0	32	1	4	0	1
Chr1	96814671	96814978	AluYRa1	+	49	4	44	0.924528	7	23	2	43	0.92	4	0.0045283	1
Chr1	96818253	96818559	AluYRa1	-	27	12	73	0.692308	7	22	11	24	0.666667	3	0.025641	1
Chr1	96819822	96820133	AluYRa1	+	17	2	26	0.894737	3	34	3	23	0.918919	4	-0.0241821	1
Chr1	96858673	96858981	AluYRa1	+	2	12	5	0.142857	1	1	4	8	0.2	1	-0.0571429	1
Chr1	96861335	96861644	AluYRa1	-	19	0	15	1	2	11	0	40	1	3	0	1
Chr1	96892573	96892874	AluYRa1	+	79	4	51	0.951807	9	94	0	59	1	9	-0.0481928	1
Chr1	96903942	96904247	AluYRa1	-	0	0	0	NaN	0	56	5	51	0.918033	7	NaN	1
Chr1	96907908	96908217	AluYRa1	+	5	0	13	1	1	53	0	19	1	4	0	1
Chr1	96920620	96920925	AluYRa1	-	40	2	23	0.952381	5	27	0	14	1	4	-0.047619	1
Chr1	96937944	96938254	AluYRa1	-	54	4	68	0.931034	7	11	0	24	1	2	-0.0689655	1
Chr1	96943182	96943500	AluYRa1	-	35	1	59	0.972222	5	55	10	58	0.846154	7	0.126068	1
Chr1	96992567	96992869	AluYRa1	-	24	6	42	0.8	4	49	2	49	0.960784	5	-0.160784	1
Chr1	96993512	96993819	AluYRa1	+	20	1	33	0.952381	3	34	3	42	0.918919	5	0.033462	1
Chr1	97001645	97001951	AluYRa1	+	63	1	28	0.984375	5	83	20	87	0.805825	10	0.17855	1
Chr1	97009923	97010229	AluYRa1	-	60	5	27	0.923077	7	24	8	39	0.75	6	0.173077	1
Chr1	97036589	97036906	AluYRa1	+	15	1	35	0.9375	3	25	1	25	0.961538	3	-0.0240385	1
Chr1	97059654	97059961	AluYRa1	+	34	0	15	1	3	83	7	54	0.922222	8	0.0777778	1
Chr1	97100598	97100915	AluYRa1	-	59	5	38	0.921875	6	51	5	42	0.910714	6	0.0111607	1
Chr1	97119420	97119728	AluYRa1	+	16	0	2	1	1	22	2	30	0.916667	3	0.0833333	1
Chr1	97147920	97148230	AluYRa1	-	20	1	36	0.952381	3	34	2	40	0.944444	4	0.00793651	1
Chr1	97150045	97150357	AluYRa1	-	17	0	5	1	2	51	1	8	0.980769	3	0.0192308	1
Chr1	97158850	97159152	AluYRa1	-	0	0	22	NaN	1	90	5	125	0.947368	10	NaN	1
Chr1	97165908	97166216	AluYRa1	+	15	0	27	1	2	59	5	83	0.921875	7	0.078125	1
Chr1	97167276	97167583	AluYRa1	-	18	0	11	1	2	49	8	69	0.859649	6	0.140351	1
Chr1	97194638	97194943	AluYRa1	+	5	0	0	1	1	22	5	32	0.814815	4	0.185185	1
Chr1	97201685	97201991	AluYRa1	-	14	1	2	0.933333	1	27	2	22	0.931034	3	0.00229885	1
Chr1	97229357	97229658	AluYRa1	-	19	3	8	0.863636	2	28	4	22	0.875	4	-0.0113636	1
Chr1	97235944	97236245	AluYRa1	-	31	2	21	0.939394	3	7	3	26	0.7	2	0.239394	1
Chr1	97244812	97245118	AluYRa1	+	36	9	60	0.8	5	13	0	8	1	1	-0.2	1
Chr1	97272633	97272937	AluYRa1	+	30	1	17	0.967742	2	21	5	43	0.807692	3	0.16005	1
Chr1	97276548	97276857	AluYRa1	+	22	4	13	0.846154	3	50	2	13	0.961538	5	-0.115385	1
Chr1	97281883	97282191	AluYRa1	-	45	6	44	0.882353	5	21	4	32	0.84	3	0.0423529	1
Chr1	97323052	97323368	AluYRa1	-	30	6	10	0.833333	2	55	5	58	0.916667	6	-0.0833333	1
Chr1	97324817	97325127	AluYRa1	+	27	0	49	1	4	57	2	68	0.966102	7	0.0338983	1
Chr1	97326464	97326770	AluYRa1	+	8	0	30	1	2	59	0	36	1	5	0	1
Chr1	97342766	97343083	AluYRa1	-	43	3	34	0.934783	5	44	2	42	0.956522	6	-0.0217391	1
Chr1	97347052	97347354	AluYRa1	-	65	1	14	0.984848	5	48	0	32	1	5	-0.0151515	1
Chr1	97349973	97350276	AluYRa1	-	13	8	13	0.619048	2	35	5	45	0.875	5	-0.255952	1
Chr1	97380141	97380451	AluYRa1	-	27	1	17	0.964286	3	1	6	24	0.142857	3	0.821429	1
Chr1	97427650	97427959	AluYRa1	-	25	0	31	1	4	0	0	0	NaN	0	NaN	1
Chr1	97439507	97439851	AluYRa1	-	22	0	14	1	2	27	0	27	1	3	0	1
Chr1	97468009	97468315	AluYRa1	-	17	4	36	0.809524	3	15	0	20	1	2	-0.190476	1
Chr1	97492910	97493218	AluYRa1	+	41	11	48	0.788462	5	47	4	41	0.921569	5	-0.133107	1
Chr1	97496112	97496413	AluYRa1	-	40	9	11	0.816327	4	37	2	6	0.948718	3	-0.132391	1
Chr1	97810423	97810724	AluYRa1	+	51	0	9	1	3	35	0	5	1	2	0	1
Chr1	97948966	97949273	AluYRa1	-	16	0	19	1	3	25	1	6	0.961538	2	0.0384615	1
Chr1	98227974	98234114	L1_RS2	+	113	43	49	0.724359	5	179	81	201	0.688462	11	0.0358974	1
Chr1	98436353	98436670	AluYRa1	-	27	0	15	1	2	15	1	5	0.9375	1	0.0625	1
Chr1	98456607	98456916	AluYRa1	+	21	13	27	0.617647	4	53	5	37	0.913793	5	-0.296146	1
Chr1	98518639	98518944	AluYRa1	-	11	0	8	1	1	18	0	32	1	6	0	1
Chr1	98706712	98707020	AluYRa1	+	67	1	37	0.985294	5	14	1	6	0.933333	1	0.0519608	1
Chr1	98727821	98728132	AluYRa1	+	28	3	41	0.903226	3	80	6	74	0.930233	7	-0.0270068	1
Chr1	98755006	98755316	AluYRa1	+	23	4	33	0.851852	3	38	4	38	0.904762	4	-0.0529101	1
Chr1	98921194	98921496	AluYRa1	+	18	0	2	1	1	61	15	24	0.802632	5	0.197368	1
Chr1	98981172	98981479	AluYRa1	+	80	8	45	0.909091	7	51	8	55	0.864407	6	0.0446841	1
Chr1	99101996	99102301	AluYRa1	-	5	2	31	0.714286	2	46	3	30	0.938776	5	-0.22449	1
Chr1	99102312	99102627	AluYRa1	-	13	4	31	0.764706	3	37	4	55	0.902439	6	-0.137733	1
Chr1	99117802	99118103	AluYRa1	-	39	0	24	1	3	61	2	42	0.968254	5	0.031746	1
Chr1	99158936	99159262	AluYRa1	-	14	2	12	0.875	2	56	8	83	0.875	7	0	1
Chr1	99162518	99162831	AluYRa1	-	36	3	34	0.923077	4	55	7	64	0.887097	6	0.0359801	1
Chr1	99180064	99180373	AluYRa1	+	29	0	11	1	2	71	2	27	0.972603	5	0.0273973	1
Chr1	99215347	99215653	AluYRa1	+	39	0	11	1	2	169	10	71	0.944134	10	0.0558659	1
Chr1	99265496	99265804	AluYRa1	+	48	7	56	0.872727	7	24	0	16	1	2	-0.127273	1
Chr1	99338237	99338541	AluYRa1	+	4	2	6	0.666667	1	5	0	7	1	1	-0.333333	1
Chr1	99346704	99347012	AluYRa1	+	15	2	21	0.882353	2	62	4	41	0.939394	6	-0.057041	1
Chr1	99355215	99355524	AluYRa1	+	25	0	20	1	3	56	4	30	0.933333	6	0.0666667	1
Chr1	99399285	99399593	AluYRa1	+	8	2	28	0.8	2	71	5	57	0.934211	7	-0.134211	1
Chr1	99413717	99414023	AluYRa1	-	7	3	5	0.7	1	71	2	32	0.972603	7	-0.272603	1
Chr1	99417985	99418295	AluYRa1	-	17	2	11	0.894737	2	42	0	39	1	6	-0.105263	1
Chr1	99421695	99422006	AluYRa1	+	37	5	50	0.880952	5	55	0	29	1	4	-0.119048	1
Chr1	99454270	99454575	AluYRa1	+	46	9	35	0.836364	5	40	5	21	0.888889	4	-0.0525253	1
Chr1	99526376	99526687	AluYRa1	-	23	15	50	0.605263	5	48	2	14	0.96	4	-0.354737	1
Chr1	99538607	99538908	AluYRa1	+	7	0	8	1	1	16	6	13	0.727273	3	0.272727	1
Chr1	99584925	99585235	AluYRa1	+	2	2	24	0.5	2	33	7	30	0.825	5	-0.325	1
Chr1	99593900	99594202	AluYRa1	+	61	7	60	0.897059	8	51	1	44	0.980769	6	-0.0837104	1
Chr1	99595582	99595889	AluYRa1	+	53	2	30	0.963636	5	52	1	49	0.981132	6	-0.0174957	1
Chr1	99634359	99634664	AluYRa1	+	30	1	33	0.967742	4	19	4	36	0.826087	4	0.141655	1
Chr1	99643772	99644082	AluYRa1	-	17	1	41	0.944444	4	52	1	42	0.981132	5	-0.0366876	1
Chr1	99659173	99659493	AluYRa1	-	30	4	46	0.882353	5	4	1	11	0.8	1	0.0823529	1
Chr1	99689585	99689888	AluYRa1	-	47	3	90	0.94	8	68	9	69	0.883117	8	0.0568831	1
Chr1	99693459	99693761	AluYRa1	+	41	3	36	0.931818	4	65	10	45	0.866667	6	0.0651515	1
Chr1	99696054	99696374	AluYRa1	-	23	2	13	0.92	2	53	12	30	0.815385	5	0.104615	1
Chr1	99712690	99712998	AluYRa1	+	51	1	20	0.980769	4	70	4	60	0.945946	8	0.0348233	1
Chr1	99728978	99729287	AluYRa1	-	44	7	41	0.862745	7	60	28	40	0.681818	10	0.180927	1
Chr1	99732594	99732903	AluYRa1	+	64	18	44	0.780488	7	85	13	82	0.867347	10	-0.0868591	1
Chr1	99747114	99747423	AluYRa1	+	15	3	50	0.833333	4	50	2	33	0.961538	5	-0.128205	1
Chr1	99767708	99768009	AluYRa1	+	22	4	44	0.846154	4	13	8	36	0.619048	4	0.227106	1
Chr1	99769533	99769839	AluYRa1	-	38	2	28	0.95	4	38	0	30	1	4	-0.05	1
Chr1	99798790	99799104	AluYRa1	+	15	1	2	0.9375	2	24	7	35	0.774194	8	0.163306	1
Chr1	99824854	99825157	AluYRa1	+	55	1	28	0.982143	4	97	0	35	1	7	-0.0178571	1
Chr1	99842149	99842453	AluYRa1	-	5	8	47	0.384615	3	30	4	43	0.882353	4	-0.497738	1
Chr1	99857770	99858072	AluYRa1	+	62	12	78	0.837838	8	38	21	19	0.644068	4	0.19377	1
Chr1	99873709	99874014	AluYRa1	+	14	11	23	0.56	3	4	1	11	0.8	1	-0.24	1
Chr1	99880060	99880362	AluYRa1	-	10	2	22	0.833333	2	24	1	26	0.96	3	-0.126667	1
Chr1	99917662	99917969	AluYRa1	+	15	6	23	0.714286	2	43	15	49	0.741379	5	-0.0270936	1
Chr1	99931091	99931417	AluYRa1	-	43	1	32	0.977273	4	48	0	28	1	4	-0.0227273	1
Chr1	99933759	99934061	AluYRa1	-	20	0	40	1	4	29	1	30	0.966667	4	0.0333333	1
Chr1	99943214	99943516	AluYRa1	-	10	3	51	0.769231	4	12	2	18	0.857143	2	-0.0879121	1
Chr1	99958995	99959305	AluYRa1	-	34	4	42	0.894737	5	22	2	16	0.916667	3	-0.0219298	1
Chr1	99983977	99984284	AluYRa1	+	43	2	39	0.955556	4	35	8	47	0.813953	5	0.141602	1
Chr1	100003581	100003886	AluYRa1	-	5	0	10	1	1	68	7	41	0.906667	8	0.0933333	1
Chr1	100013790	100014098	AluYRa1	-	20	0	32	1	4	38	0	19	1	5	0	1
Chr1	100016537	100016841	AluYRa1	+	8	0	10	1	1	28	2	42	0.933333	4	0.0666667	1
Chr1	100023053	100023357	AluYRa1	-	97	2	27	0.979798	6	30	7	47	0.810811	4	0.168987	1
Chr1	100031284	100031592	AluYRa1	+	44	7	25	0.862745	4	43	2	31	0.955556	4	-0.0928105	1
Chr1	100041765	100042068	AluYRa1	+	26	6	32	0.8125	4	14	0	40	1	3	-0.1875	1
Chr1	100078971	100079275	AluYRa1	-	40	1	47	0.97561	4	27	0	17	1	2	-0.0243902	1
Chr1	100095775	100096084	AluYRa1	-	49	2	15	0.960784	3	55	6	71	0.901639	6	0.059145	1
Chr1	100111790	100112091	AluYRa1	+	41	4	64	0.911111	6	33	8	39	0.804878	4	0.106233	1
Chr1	100114940	100115244	AluYRa1	-	7	5	21	0.583333	3	22	3	28	0.88	5	-0.296667	1
Chr1	100139866	100140174	AluYRa1	+	23	4	15	0.851852	3	18	0	12	1	3	-0.148148	1
Chr1	100147490	100147815	AluYRa1	-	26	7	35	0.787879	4	37	4	34	0.902439	5	-0.11456	1
Chr1	100150435	100150744	AluYRa1	+	36	2	50	0.947368	4	15	1	28	0.9375	2	0.00986842	1
Chr1	100176853	100177164	AluYRa1	+	27	3	18	0.9	3	45	0	32	1	5	-0.1	1
Chr1	100189083	100189387	AluYRa1	-	7	1	9	0.875	1	55	3	61	0.948276	7	-0.0732759	1
Chr1	100191021	100191325	AluYRa1	-	11	2	15	0.846154	2	17	2	23	0.894737	3	-0.048583	1
Chr1	100192095	100192405	AluYRa1	-	25	1	37	0.961538	3	35	15	26	0.7	4	0.261538	1
Chr1	100196045	100196347	AluYRa1	-	14	0	30	1	2	40	1	47	0.97561	4	0.0243902	1
Chr1	100198158	100198465	AluYRa1	+	12	10	20	0.545455	3	12	3	13	0.8	2	-0.254545	1
Chr1	100200882	100201187	AluYRa1	-	35	1	28	0.972222	4	27	0	5	1	2	-0.0277778	1
Chr1	100217939	100218248	AluYRa1	+	35	5	53	0.875	6	33	5	30	0.868421	4	0.00657895	1
Chr1	100232944	100233251	AluYRa1	-	16	4	28	0.8	3	28	2	60	0.933333	5	-0.133333	1
Chr1	100247587	100247894	AluYRa1	+	27	3	27	0.9	3	26	1	37	0.962963	4	-0.062963	1
Chr1	100259465	100259774	AluYRa1	-	33	5	18	0.868421	4	19	2	35	0.904762	4	-0.0363409	1
Chr1	100285261	100285565	AluYRa1	+	34	0	17	1	3	37	1	4	0.973684	3	0.0263158	1
Chr1	100303897	100304203	AluYRa1	+	30	0	14	1	2	115	1	82	0.991379	9	0.00862069	1
Chr1	100305585	100305900	AluYRa1	+	25	1	22	0.961538	3	63	2	44	0.969231	7	-0.00769231	1
Chr1	100309031	100309341	AluYRa1	+	53	3	36	0.946429	4	33	1	58	0.970588	4	-0.0241597	1
Chr1	100318664	100318968	AluYRa1	+	28	1	7	0.965517	2	30	1	23	0.967742	3	-0.00222469	1
Chr1	100329470	100329774	AluYRa1	+	1	2	14	0.333333	1	14	0	24	1	3	-0.666667	1
Chr1	100348022	100348333	AluYRa1	-	28	7	18	0.8	4	22	3	9	0.88	2	-0.08	1
Chr1	100395520	100395832	AluYRa1	-	14	2	35	0.875	3	86	1	49	0.988506	8	-0.113506	1
Chr1	100401779	100402088	AluYRa1	-	69	4	37	0.945205	5	88	3	107	0.967033	9	-0.0218275	1
Chr1	100460713	100461028	AluYRa1	-	33	0	8	1	3	75	1	76	0.986842	8	0.0131579	1
Chr1	100465328	100465633	AluYRa1	+	17	1	16	0.944444	2	88	5	60	0.946237	9	-0.00179211	1
Chr1	100491818	100492128	AluYRa1	+	34	2	42	0.944444	5	11	0	6	1	1	-0.0555556	1
Chr1	100497724	100498027	AluYRa1	-	7	5	28	0.583333	2	42	10	68	0.807692	6	-0.224359	1
Chr1	100522307	100522610	AluYRa1	+	21	1	40	0.954545	4	48	4	54	0.923077	6	0.0314685	1
Chr1	100522694	100523003	AluYRa1	+	21	3	36	0.875	4	34	13	59	0.723404	6	0.151596	1
Chr1	100532829	100533147	AluYRa1	-	30	2	19	0.9375	3	64	2	70	0.969697	8	-0.032197	1
Chr1	100533805	100534110	AluYRa1	+	45	1	20	0.978261	3	80	2	116	0.97561	9	0.00265111	1
Chr1	100541916	100542226	AluYRa1	-	39	2	51	0.95122	4	87	6	107	0.935484	10	0.0157356	1
Chr1	100559295	100559602	AluYRa1	-	16	4	28	0.8	3	24	2	19	0.923077	3	-0.123077	1
Chr1	100571884	100572201	AluYRa1	-	29	3	38	0.90625	4	35	3	72	0.921053	6	-0.0148026	1
Chr1	100574111	100574421	AluYRa1	+	0	1	13	0	1	32	8	30	0.8	5	-0.8	1
Chr1	100579139	100579441	AluYRa1	+	5	2	12	0.714286	1	61	5	48	0.924242	6	-0.209957	1
Chr1	100613004	100613323	AluYRa1	-	48	6	35	0.888889	5	43	5	32	0.895833	4	-0.00694444	1
Chr1	100614516	100614824	AluYRa1	-	20	18	57	0.526316	5	26	1	87	0.962963	6	-0.436647	1
Chr1	100629318	100629628	AluYRa1	-	54	3	43	0.947368	5	96	0	44	1	7	-0.0526316	1
Chr1	100643170	100643474	AluYRa1	-	43	6	56	0.877551	7	35	20	68	0.636364	9	0.241187	1
Chr1	100706811	100707112	AluYRa1	-	66	3	83	0.956522	8	33	1	4	0.970588	2	-0.0140665	1
Chr1	100714160	100714464	AluYRa1	-	59	1	16	0.983333	4	28	0	10	1	2	-0.0166667	1
Chr1	100716691	100717003	AluYRa1	-	45	0	21	1	4	13	8	17	0.619048	2	0.380952	1
Chr1	100733758	100734066	AluYRa1	+	12	0	30	1	2	48	0	57	1	5	0	1
Chr1	100758970	100759275	AluYRa1	-	20	0	22	1	3	57	5	50	0.919355	8	0.0806452	1
Chr1	100782061	100782368	AluYRa1	+	17	1	18	0.944444	2	0	0	0	NaN	0	NaN	1
Chr1	100803922	100804231	AluYRa1	-	13	1	7	0.928571	2	13	0	15	1	2	-0.0714286	1
Chr1	100812519	100812823	AluYRa1	-	9	5	4	0.642857	1	19	0	71	1	5	-0.357143	1
Chr1	100846441	100846751	AluYRa1	+	15	1	29	0.9375	3	34	2	54	0.944444	6	-0.00694444	1
Chr1	100852667	100852971	AluYRa1	+	0	12	10	0	1	40	3	85	0.930233	6	-0.930233	1
Chr1	100876043	100876348	AluYRa1	-	46	3	46	0.938776	5	29	4	62	0.878788	5	0.0599876	1
Chr1	100877392	100877702	AluYRa1	-	39	1	40	0.975	4	53	11	96	0.828125	8	0.146875	1
Chr1	100878443	100878744	AluYRa1	-	42	3	25	0.933333	4	60	28	132	0.681818	10	0.251515	1
Chr1	100902180	100902488	AluYRa1	-	91	6	83	0.938144	9	15	0	5	1	1	-0.0618557	1
Chr1	100905279	100905625	AluYRa1	-	83	5	82	0.943182	10	6	1	13	0.857143	2	0.086039	1
Chr1	100911209	100911517	AluYRa1	+	86	2	53	0.977273	8	16	1	37	0.941176	3	0.0360963	1
Chr1	100918789	100919097	AluYRa1	+	32	4	27	0.888889	3	56	9	79	0.861538	7	0.0273504	1
Chr1	100922446	100922764	AluYRa1	-	2	70	25	0.0277778	5	1	82	37	0.0120482	6	0.0157296	1
Chr1	100948535	100948844	AluYRa1	-	5	1	16	0.833333	2	31	8	33	0.794872	5	0.0384615	1
Chr1	100955112	100955444	AluYRa1	+	62	1	35	0.984127	6	41	1	30	0.97619	4	0.00793651	1
Chr1	100963490	100963794	AluYRa1	+	70	0	50	1	6	33	1	6	0.970588	2	0.0294118	1
Chr1	100967872	100968178	AluYRa1	-	62	7	75	0.898551	8	28	2	42	0.933333	4	-0.0347826	1
Chr1	100979348	100979655	AluYRa1	+	13	2	16	0.866667	2	29	11	39	0.725	5	0.141667	1
Chr1	100984065	100984368	AluYRa1	+	21	4	32	0.84	3	23	0	34	1	3	-0.16	1
Chr1	100991459	100991761	AluYRa1	-	33	1	19	0.970588	4	52	5	69	0.912281	6	0.0583075	1
Chr1	101013854	101014159	AluYRa1	-	77	0	47	1	6	37	1	58	0.973684	5	0.0263158	1
Chr1	101020997	101021303	AluYRa1	-	18	1	11	0.947368	2	10	4	31	0.714286	3	0.233083	1
Chr1	101037256	101037562	AluYRa1	+	19	0	7	1	2	66	2	59	0.970588	6	0.0294118	1
Chr1	101051109	101051410	AluYRa1	-	13	5	14	0.722222	2	71	13	46	0.845238	9	-0.123016	1
Chr1	101066185	101066488	AluYRa1	+	0	0	0	NaN	0	52	2	44	0.962963	7	NaN	1
Chr1	101087629	101087934	AluYRa1	+	46	3	21	0.938776	5	27	3	12	0.9	3	0.0387755	1
Chr1	101121520	101121830	AluYRa1	+	43	3	48	0.934783	5	91	1	72	0.98913	9	-0.0543478	1
Chr1	101125737	101126045	AluYRa1	+	50	3	23	0.943396	4	58	3	72	0.95082	7	-0.00742345	1
Chr1	101135502	101135806	AluYRa1	+	43	4	13	0.914894	4	55	1	19	0.982143	5	-0.0672492	1
Chr1	101169310	101169618	AluYRa1	+	21	1	22	0.954545	2	38	0	6	1	2	-0.0454545	1
Chr1	101191666	101191979	AluYRa1	-	0	0	0	NaN	0	38	0	47	1	5	NaN	1
Chr1	101200246	101200547	AluYRa1	-	43	2	15	0.955556	3	34	2	24	0.944444	3	0.0111111	1
Chr1	101209912	101210221	AluYRa1	+	30	2	48	0.9375	4	80	9	31	0.898876	6	0.0386236	1
Chr1	101216895	101217202	AluYRa1	+	0	0	0	NaN	0	24	2	30	0.923077	4	NaN	1
Chr1	101233709	101234010	AluYRa1	-	30	4	56	0.882353	5	76	8	42	0.904762	7	-0.022409	1
Chr1	101252161	101252465	AluYRa1	+	6	0	2	1	1	38	12	40	0.76	5	0.24	1
Chr1	101300906	101301215	AluYRa1	-	27	2	7	0.931034	2	88	1	55	0.988764	8	-0.0577296	1
Chr1	101335380	101335689	AluYRa1	+	25	0	26	1	3	53	1	14	0.981481	4	0.0185185	1
Chr1	101352972	101353276	AluYRa1	-	28	9	43	0.756757	4	57	0	43	1	5	-0.243243	1
Chr1	101423711	101424016	AluYRa1	-	15	10	44	0.6	3	30	22	40	0.576923	4	0.0230769	1
Chr1	101536764	101537071	AluYRa1	-	48	3	68	0.941176	9	25	5	5	0.833333	3	0.107843	1
Chr1	101632272	101632586	AluYRa1	+	3	0	0	1	1	52	3	18	0.945455	4	0.0545455	1
Chr1	101664968	101665278	AluYRa1	+	10	4	55	0.714286	3	53	26	36	0.670886	5	0.0433996	1
Chr1	101691265	101691569	AluYRa1	-	47	8	40	0.854545	5	25	19	51	0.568182	5	0.286364	1
Chr1	101789414	101789723	AluYRa1	-	3	1	56	0.75	3	40	18	42	0.689655	5	0.0603448	1
Chr1	101824493	101824800	AluYRa1	-	3	1	32	0.75	2	50	11	47	0.819672	6	-0.0696721	1
Chr1	101867465	101867768	AluYRa1	-	31	3	30	0.911765	5	30	12	20	0.714286	4	0.197479	1
Chr1	101888967	101889276	AluYRa1	-	46	4	34	0.92	4	55	5	27	0.916667	5	0.00333333	1
Chr1	101906672	101912796	L1PA5	-	36	11	17	0.765957	6	95	39	89	0.708955	7	0.0570022	1
Chr1	101925117	101925424	AluYRa1	+	35	7	51	0.833333	6	4	15	17	0.210526	2	0.622807	1
Chr1	101933844	101934153	AluYRa1	+	2	2	16	0.5	2	62	5	5	0.925373	4	-0.425373	1
Chr1	101999627	101999940	AluYRa1	-	43	4	33	0.914894	4	88	21	31	0.807339	7	0.107554	1
Chr1	102025086	102025397	AluYRa1	-	60	1	44	0.983607	5	96	1	50	0.989691	7	-0.00608416	1
Chr1	102094125	102094463	AluYRa1	-	9	1	9	0.9	1	11	1	26	0.916667	2	-0.0166667	1
Chr1	102098218	102098531	AluYRa1	+	51	3	60	0.944444	6	30	1	26	0.967742	3	-0.0232975	1
Chr1	102146605	102146913	AluYRa1	+	0	0	0	NaN	0	28	0	14	1	2	NaN	1
Chr1	102160413	102160719	AluYRa1	+	0	0	0	NaN	0	36	4	38	0.9	5	NaN	1
Chr1	102198810	102199120	AluYRa1	-	47	0	16	1	3	69	1	35	0.985714	5	0.0142857	1
Chr1	102204918	102205227	AluYRa1	+	47	1	22	0.979167	5	14	5	21	0.736842	4	0.242325	1
Chr1	102231495	102237551	L1PA5	-	87	21	37	0.805556	7	60	23	32	0.722892	5	0.082664	1
Chr1	102433151	102433454	AluYRa1	-	8	2	11	0.8	1	36	73	38	0.330275	7	0.469725	1
Chr1	102623999	102624306	AluYRa1	+	6	2	18	0.75	2	13	1	12	0.928571	2	-0.178571	1
Chr1	102719437	102719745	AluYRa1	+	10	0	22	1	2	40	2	54	0.952381	6	0.047619	1
Chr1	102752503	102752812	AluYRa1	+	27	0	18	1	3	27	1	23	0.964286	3	0.0357143	1
Chr1	102867212	102867524	AluYRa1	+	43	1	61	0.977273	5	4	2	15	0.666667	1	0.310606	1
Chr1	102874163	102874467	AluYRa1	+	17	1	36	0.944444	3	44	2	26	0.956522	4	-0.0120773	1
Chr1	102886401	102886708	AluYRa1	+	32	3	41	0.914286	4	34	70	40	0.326923	9	0.587363	2.53e-05
Chr1	102891896	102892266	MacERV1_LTR4	+	27	2	22	0.931034	6	9	2	39	0.818182	5	0.112853	1
Chr1	102898148	102898520	MacERV1_LTR4	+	14	0	16	1	3	44	3	23	0.93617	7	0.0638298	1
Chr1	102916023	102916331	AluYRa1	-	89	4	54	0.956989	7	66	28	116	0.702128	10	0.254862	0.14612
Chr1	103000205	103000513	AluYRa1	-	14	1	6	0.933333	1	21	5	19	0.807692	3	0.125641	1
Chr1	103014691	103015000	AluYRa1	-	6	1	11	0.857143	2	17	12	19	0.586207	3	0.270936	1
Chr1	103041778	103042100	AluYRa1	+	36	6	9	0.857143	3	31	7	17	0.815789	4	0.0413534	1
Chr1	103129324	103129626	AluYRa1	-	23	0	11	1	2	16	14	4	0.533333	2	0.466667	1
Chr1	103142771	103143072	AluYRa1	+	62	1	42	0.984127	7	106	6	75	0.946429	11	0.0376984	1
Chr1	103166151	103166460	AluYRa1	+	12	1	7	0.923077	1	30	1	9	0.967742	2	-0.044665	1
Chr1	103214444	103214757	AluYRa1	-	15	5	37	0.75	3	48	6	22	0.888889	4	-0.138889	1
Chr1	103225571	103225879	AluYRa1	+	23	2	9	0.92	2	25	5	21	0.833333	3	0.0866667	1
Chr1	103228897	103229200	AluYRa1	+	15	3	20	0.833333	2	18	18	40	0.5	4	0.333333	1
Chr1	103231702	103232010	AluYRa1	-	5	0	16	1	1	1	6	35	0.142857	2	0.857143	1
Chr1	103253561	103253867	AluYRa1	-	16	5	40	0.761905	4	81	9	143	0.9	13	-0.138095	1
Chr1	103264759	103265061	AluYRa1	+	27	3	49	0.9	5	11	0	6	1	1	-0.1	1
Chr1	103394955	103395264	AluYRa1	+	13	1	43	0.928571	3	28	6	23	0.823529	3	0.105042	1
Chr1	103407449	103407757	AluYRa1	-	32	2	29	0.941176	3	112	4	108	0.965517	11	-0.0243408	1
Chr1	103435279	103435585	AluYRa1	-	37	0	32	1	3	37	1	8	0.973684	2	0.0263158	1
Chr1	103449767	103450068	AluYRa1	-	11	1	18	0.916667	2	60	7	55	0.895522	9	0.0211443	1
Chr1	103458434	103458751	AluYRa1	-	35	0	25	1	3	45	3	52	0.9375	5	0.0625	1
Chr1	103483473	103483781	AluYRa1	-	3	1	15	0.75	2	55	3	44	0.948276	6	-0.198276	1
Chr1	103493420	103493722	AluYRa1	-	23	1	33	0.958333	3	38	0	19	1	3	-0.0416667	1
Chr1	103516115	103516438	AluYRa1	-	26	5	4	0.83871	3	7	1	22	0.875	2	-0.0362903	1
Chr1	103519215	103519523	AluYRa1	-	8	2	24	0.8	2	41	3	43	0.931818	6	-0.131818	1
Chr1	103542923	103543225	AluYRa1	-	37	2	29	0.948718	4	34	3	14	0.918919	3	0.029799	1
Chr1	103551460	103551766	AluYRa1	-	49	4	59	0.924528	6	17	1	1	0.944444	1	-0.0199161	1
Chr1	103562630	103562939	AluYRa1	+	74	19	47	0.795699	7	28	5	7	0.848485	2	-0.0527859	1
Chr1	103760868	103761171	AluYRa1	-	11	8	6	0.578947	2	20	11	49	0.645161	5	-0.0662139	1
Chr1	103767355	103767660	AluYRa1	-	53	3	28	0.946429	4	31	0	11	1	2	-0.0535714	1
Chr1	103851854	103857996	L1PA5	+	18	7	40	0.72	2	85	12	81	0.876289	9	-0.156289	1
Chr1	103882128	103882438	AluYRa1	+	22	7	43	0.758621	4	20	3	13	0.869565	2	-0.110945	1
Chr1	103958384	103958691	AluYRa1	+	40	0	52	1	4	31	1	37	0.96875	3	0.03125	1
Chr1	103959238	103959547	AluYRa1	-	41	5	62	0.891304	6	23	1	48	0.958333	4	-0.067029	1
Chr1	104472807	104473108	AluYRa1	-	0	0	3	NaN	1	44	0	16	1	3	NaN	1
Chr1	104490341	104490646	AluYRa1	-	38	5	14	0.883721	5	17	2	5	0.894737	2	-0.0110159	1
Chr1	104503092	104503462	MacERV1_LTR4	+	10	1	19	0.909091	3	44	8	28	0.846154	8	0.0629371	1
Chr1	104509841	104510207	MacERV1_LTR4	+	15	1	14	0.9375	3	31	17	42	0.645833	9	0.291667	1
Chr1	104547933	104548235	AluYRa1	-	54	6	24	0.9	6	4	28	10	0.125	3	0.775	1
Chr1	104595178	104595479	AluYRa1	+	10	2	6	0.833333	2	22	6	17	0.785714	5	0.047619	1
Chr1	104623585	104623889	AluYRa1	-	38	4	29	0.904762	4	49	5	46	0.907407	5	-0.0026455	1
Chr1	104717066	104723238	L1PA5	-	13	3	18	0.8125	3	57	18	73	0.76	11	0.0525	1
Chr1	104832873	104833178	AluYRa1	-	4	0	10	1	1	63	0	56	1	7	0	1
Chr1	104919556	104919865	AluYRa1	-	12	0	5	1	1	24	1	17	0.96	3	0.04	1
Chr1	104991937	104992269	AluYRa1	-	20	2	14	0.909091	2	14	2	20	0.875	2	0.0340909	1
Chr1	105005374	105005685	AluYRa1	+	4	0	11	1	1	24	0	21	1	3	0	1
Chr1	105009256	105009560	AluYRa1	-	37	2	23	0.948718	4	5	0	13	1	1	-0.0512821	1
Chr1	105034004	105034314	AluYRa1	-	54	0	9	1	3	91	1	13	0.98913	5	0.0108696	1
Chr1	105110638	105110943	AluYRa1	+	64	0	5	1	3	50	9	33	0.847458	4	0.152542	1
Chr1	105150375	105150682	AluYRa1	-	68	8	78	0.894737	7	41	0	25	1	3	-0.105263	1
Chr1	105228941	105235085	L1_RS2	-	98	10	76	0.907407	6	188	17	106	0.917073	13	-0.00966576	1
Chr1	105236909	105237210	AluYRa1	+	26	1	30	0.962963	3	58	6	41	0.90625	7	0.056713	1
Chr1	105406793	105407105	AluYRa1	-	52	4	39	0.928571	5	72	1	41	0.986301	6	-0.0577299	1
Chr1	105669724	105670025	AluYRa1	-	37	2	31	0.948718	5	59	3	50	0.951613	8	-0.00289495	1
Chr1	105674574	105674878	AluYRa1	+	41	3	20	0.931818	4	40	13	38	0.754717	7	0.177101	1
Chr1	105710211	105717675	L1PA5	-	55	6	50	0.901639	7	49	32	39	0.604938	10	0.296701	0.0506869
Chr1	105821894	105828047	L1_RS2	-	123	25	96	0.831081	6	179	67	191	0.727642	12	0.103439	1
Chr1	105835156	105835464	AluYRa1	-	45	4	8	0.918367	3	46	1	22	0.978723	4	-0.0603561	1
Chr1	105854053	105854364	AluYRa1	+	51	8	67	0.864407	6	86	5	56	0.945055	7	-0.0806482	1
Chr1	106257228	106263344	L1PA5	+	139	17	76	0.891026	9	96	33	120	0.744186	13	0.14684	0.860452
Chr1	106304996	106305307	AluYRa1	-	40	0	24	1	4	61	3	32	0.953125	6	0.046875	1
Chr1	106399767	106400074	AluYRa1	+	39	0	51	1	5	99	4	77	0.961165	10	0.038835	1
Chr1	106478660	106484820	L1_RS2	+	64	22	91	0.744186	5	157	51	126	0.754808	13	-0.0106216	1
Chr1	106500730	106506928	L1PA5	+	43	17	45	0.716667	7	64	15	34	0.810127	9	-0.0934599	1
Chr1	106664349	106664662	AluYRa1	+	32	2	29	0.941176	4	83	7	30	0.922222	6	0.0189542	1
Chr1	106754913	106755219	AluYRa1	+	29	4	21	0.878788	3	32	24	52	0.571429	6	0.307359	1
Chr1	106770820	106771138	AluYRa1	+	46	5	37	0.901961	4	83	3	46	0.965116	6	-0.0631555	1
Chr1	106903373	106903680	AluYRa1	-	14	2	57	0.875	4	13	2	4	0.866667	1	0.00833333	1
Chr1	106931086	106931395	AluYRa1	-	57	0	38	1	5	28	5	15	0.848485	3	0.151515	1
Chr1	106932632	106932934	AluYRa1	+	74	4	48	0.948718	6	20	5	38	0.8	3	0.148718	1
Chr1	106976579	106976886	AluYRa1	+	9	2	7	0.818182	1	98	8	38	0.924528	8	-0.106346	1
Chr1	107000532	107000844	AluYRa1	-	32	2	26	0.941176	3	26	1	13	0.962963	2	-0.0217865	1
Chr1	107016260	107016564	AluYRa1	-	30	1	26	0.967742	3	49	6	40	0.890909	5	0.0768328	1
Chr1	107033347	107033655	AluYRa1	+	30	2	19	0.9375	3	25	0	9	1	2	-0.0625	1
Chr1	107037560	107037869	AluYRa1	-	30	0	21	1	3	54	7	33	0.885246	6	0.114754	1
Chr1	107089533	107089841	AluYRa1	-	11	0	6	1	1	14	0	3	1	1	0	1
Chr1	107108723	107109035	AluYRa1	+	43	5	32	0.895833	5	31	2	47	0.939394	5	-0.0435606	1
Chr1	107128994	107129297	AluYRa1	+	31	0	11	1	3	7	0	30	1	2	0	1
Chr1	107165899	107166204	AluYRa1	-	18	1	25	0.947368	4	53	1	23	0.981481	7	-0.0341131	1
Chr1	107178874	107179189	AluYRa1	-	15	1	16	0.9375	2	25	20	19	0.555556	4	0.381944	1
Chr1	107409128	107409435	AluYRa1	+	39	0	7	1	2	75	13	50	0.852273	6	0.147727	1
Chr1	107440397	107440733	AluYRa1	-	39	5	36	0.886364	4	35	3	42	0.921053	4	-0.034689	1
Chr1	107462370	107462672	AluYRa1	+	13	2	27	0.866667	2	5	0	20	1	2	-0.133333	1
Chr1	107783789	107784096	AluYRa1	-	87	17	49	0.836538	9	25	13	47	0.657895	5	0.178644	1
Chr1	107796373	107796683	AluYRa1	+	25	1	25	0.961538	3	12	0	5	1	1	-0.0384615	1
Chr1	107816628	107816929	AluYRa1	+	42	6	49	0.875	7	80	10	90	0.888889	12	-0.0138889	1
Chr1	107907817	107908126	AluYRa1	-	24	1	26	0.96	3	28	2	38	0.933333	4	0.0266667	1
Chr1	107941779	107942107	AluYRa1	-	56	8	31	0.875	5	22	3	13	0.88	2	-0.005	1
Chr1	108020978	108021282	AluYRa1	-	13	1	31	0.928571	3	9	4	17	0.692308	2	0.236264	1
Chr1	108187766	108188075	AluYRa1	+	53	10	57	0.84127	5	123	2	64	0.984	8	-0.14273	1
Chr1	108363386	108363689	AluYRa1	-	11	4	21	0.733333	2	67	1	22	0.985294	5	-0.251961	1
Chr1	108635975	108636284	AluYRa1	+	34	2	27	0.944444	3	124	9	53	0.932331	9	0.0121136	1
Chr1	108727338	108727644	AluYRa1	+	23	5	18	0.821429	4	16	4	32	0.8	4	0.0214286	1
Chr1	108838113	108844218	L1PA5	+	52	14	29	0.787879	10	46	26	32	0.638889	10	0.14899	1
Chr1	108882848	108888981	L1_RS2	-	85	21	70	0.801887	4	276	78	110	0.779661	11	0.0222258	1
Chr1	109029158	109035305	L1_RS2	-	225	50	163	0.818182	9	170	54	96	0.758929	6	0.0592532	1
Chr1	109044620	109044929	AluYRa1	-	11	1	8	0.916667	1	99	3	46	0.970588	8	-0.0539216	1
Chr1	109184897	109185223	AluYRa1	-	71	1	60	0.986111	6	63	6	41	0.913043	5	0.0730676	1
Chr1	109237881	109238185	AluYRa1	-	29	0	35	1	4	67	1	44	0.985294	7	0.0147059	1
Chr1	109292588	109292889	AluYRa1	+	26	4	26	0.866667	4	30	2	10	0.9375	3	-0.0708333	1
Chr1	109450417	109450722	AluYRa1	-	51	14	55	0.784615	6	38	10	72	0.791667	6	-0.00705128	1
Chr1	109475684	109475986	AluYRa1	+	12	4	51	0.75	4	27	3	25	0.9	3	-0.15	1
Chr1	109608176	109608486	AluYRa1	-	0	0	11	NaN	1	32	4	19	0.888889	5	NaN	1
Chr1	109652117	109652420	AluYRa1	+	11	2	6	0.846154	1	62	5	66	0.925373	7	-0.0792193	1
Chr1	109690855	109691160	AluYRa1	-	22	0	3	1	2	55	1	42	0.982143	7	0.0178571	1
Chr1	109720142	109720452	AluYRa1	-	15	7	23	0.681818	3	29	5	41	0.852941	5	-0.171123	1
Chr1	109736632	109736936	AluYRa1	-	52	9	22	0.852459	5	7	1	11	0.875	1	-0.022541	1
Chr1	109737914	109738232	AluYRa1	-	29	0	55	1	4	1	0	20	1	1	0	1
Chr1	109767322	109767642	AluYRa1	-	33	2	54	0.942857	7	46	22	85	0.676471	9	0.266387	1
Chr1	109918731	109919040	AluYRa1	+	53	1	34	0.981481	4	89	1	67	0.988889	8	-0.00740741	1
Chr1	110181669	110181976	AluYRa1	-	47	0	45	1	4	19	3	27	0.863636	3	0.136364	1
Chr1	110263458	110263763	AluYRa1	+	24	8	13	0.75	3	86	3	39	0.966292	8	-0.216292	1
Chr1	110284900	110285202	AluYRa1	+	36	1	23	0.972973	3	57	7	36	0.890625	5	0.082348	1
Chr1	110287833	110288142	AluYRa1	-	23	0	16	1	3	24	5	15	0.827586	4	0.172414	1
Chr1	110311827	110312128	AluYRa1	-	34	11	63	0.755556	6	28	0	44	1	4	-0.244444	1
Chr1	110322084	110322388	AluYRa1	-	0	0	0	NaN	0	34	6	88	0.85	7	NaN	1
Chr1	110334750	110335053	AluYRa1	-	50	2	47	0.961538	5	54	0	60	1	5	-0.0384615	1
Chr1	110358684	110358990	AluYRa1	+	31	1	8	0.96875	2	58	1	61	0.983051	6	-0.0143008	1
Chr1	110359754	110360063	AluYRa1	+	22	0	24	1	2	36	1	55	0.972973	4	0.027027	1
Chr1	110381045	110381355	AluYRa1	-	27	0	9	1	2	29	5	56	0.852941	5	0.147059	1
Chr1	110496334	110496647	AluYRa1	-	12	0	6	1	1	90	1	87	0.989011	11	0.010989	1
Chr1	110507499	110507805	AluYRa1	+	17	1	18	0.944444	2	66	0	32	1	6	-0.0555556	1
Chr1	110652275	110658409	L1_RS2	-	179	6	92	0.967568	9	138	9	53	0.938776	6	0.0287921	1
Chr1	110714103	110714407	AluYRa1	+	56	4	45	0.933333	6	21	1	32	0.954545	3	-0.0212121	1
Chr1	110894081	110894387	AluYRa1	-	43	3	17	0.934783	4	25	1	34	0.961538	3	-0.0267559	1
Chr1	110894756	110895066	AluYRa1	-	60	2	19	0.967742	4	18	1	51	0.947368	4	0.0203735	1
Chr1	110904258	110904567	AluYRa1	-	49	7	50	0.875	6	24	1	30	0.96	3	-0.085	1
Chr1	110908019	110908342	AluYRa1	-	5	0	15	1	1	19	0	1	1	1	0	1
Chr1	111025257	111025562	AluYRa1	-	10	1	2	0.909091	1	44	8	24	0.846154	6	0.0629371	1
Chr1	111077777	111078083	AluYRa1	+	16	3	17	0.842105	2	52	3	27	0.945455	5	-0.103349	1
Chr1	111089502	111089805	AluYRa1	+	45	3	37	0.9375	5	53	7	27	0.883333	6	0.0541667	1
Chr1	111111320	111111627	AluYRa1	-	16	3	15	0.842105	2	0	8	7	0	1	0.842105	1
Chr1	111113866	111114182	AluYRa1	+	13	1	18	0.928571	2	29	6	23	0.828571	4	0.1	1
Chr1	111114875	111115181	AluYRa1	+	8	3	43	0.727273	3	37	3	50	0.925	5	-0.197727	1
Chr1	111116656	111116965	AluYRa1	+	0	3	22	0	2	34	2	52	0.944444	4	-0.944444	1
Chr1	111130112	111130424	AluYRa1	+	0	0	0	NaN	0	39	7	20	0.847826	5	NaN	1
Chr1	111132316	111132622	AluYRa1	+	14	4	35	0.777778	3	79	20	115	0.79798	12	-0.020202	1
Chr1	111137161	111137470	AluYRa1	+	0	0	0	NaN	0	46	7	52	0.867925	5	NaN	1
Chr1	111138881	111139186	AluYRa1	-	14	0	7	1	2	12	3	53	0.8	4	0.2	1
Chr1	111147097	111147405	AluYRa1	+	58	14	47	0.805556	7	79	18	71	0.814433	10	-0.00887743	1
Chr1	111152236	111152545	AluYRa1	+	24	0	30	1	3	28	0	8	1	2	0	1
Chr1	111153923	111154227	AluYRa1	-	38	0	38	1	4	8	0	30	1	2	0	1
Chr1	111168327	111168634	AluYRa1	-	29	2	38	0.935484	3	12	3	15	0.8	2	0.135484	1
Chr1	111180579	111180890	AluYRa1	+	38	0	50	1	4	7	0	15	1	1	0	1
Chr1	111181905	111182207	AluYRa1	-	41	2	25	0.953488	4	0	0	0	NaN	0	NaN	1
Chr1	111183698	111184005	AluYRa1	-	39	1	17	0.975	3	30	0	8	1	2	-0.025	1
Chr1	111184938	111185241	AluYRa1	-	33	0	18	1	3	16	1	17	0.941176	2	0.0588235	1
Chr1	111185590	111185899	AluYRa1	-	22	3	26	0.88	3	17	2	32	0.894737	3	-0.0147368	1
Chr1	111200741	111201044	AluYRa1	-	33	2	22	0.942857	3	41	5	47	0.891304	5	0.0515528	1
Chr1	111212435	111212747	AluYRa1	-	16	1	9	0.941176	2	8	1	32	0.888889	2	0.0522876	1
Chr1	111242542	111242849	AluYRa1	-	24	0	12	1	2	50	2	38	0.961538	5	0.0384615	1
Chr1	111285298	111285604	AluYRa1	-	35	4	33	0.897436	4	88	9	63	0.907216	9	-0.0097806	1
Chr1	111334257	111334566	AluYRa1	-	25	4	26	0.862069	5	25	6	33	0.806452	6	0.0556174	1
Chr1	111360718	111361028	AluYRa1	+	23	0	8	1	2	10	1	27	0.909091	2	0.0909091	1
Chr1	111369690	111370002	AluYRa1	+	24	3	36	0.888889	3	16	0	26	1	2	-0.111111	1
Chr1	111386181	111386493	AluYRa1	+	0	0	0	NaN	0	4	2	14	0.666667	1	NaN	1
Chr1	111394098	111394399	AluYRa1	-	23	4	36	0.851852	3	23	0	61	1	4	-0.148148	1
Chr1	111412715	111413023	AluYRa1	-	29	4	26	0.878788	4	65	8	71	0.890411	8	-0.0116231	1
Chr1	111421060	111421368	AluYRa1	+	18	5	30	0.782609	3	26	5	9	0.83871	2	-0.056101	1
Chr1	111433648	111433958	AluYRa1	+	30	9	26	0.769231	5	38	11	45	0.77551	8	-0.00627943	1
Chr1	111464290	111464596	AluYRa1	+	56	1	28	0.982456	5	53	5	62	0.913793	7	0.068663	1
Chr1	111470221	111470535	AluYRa1	+	40	2	9	0.952381	6	10	0	22	1	2	-0.047619	1
Chr1	111490935	111491243	AluYRa1	+	38	2	19	0.95	4	30	0	21	1	3	-0.05	1
Chr1	111503864	111504173	AluYRa1	+	91	10	49	0.90099	8	59	3	33	0.951613	5	-0.0506228	1
Chr1	111655396	111655704	AluYRa1	+	42	3	12	0.933333	3	11	0	8	1	1	-0.0666667	1
Chr1	111676646	111676957	AluYRa1	+	2	0	17	1	1	88	6	60	0.93617	9	0.0638298	1
Chr1	111680698	111681028	AluYRa1	-	43	0	41	1	4	79	0	26	1	5	0	1
Chr1	111689991	111690300	AluYRa1	-	17	1	62	0.944444	4	49	3	108	0.942308	8	0.00213675	1
Chr1	111694411	111694717	AluYRa1	-	69	3	54	0.958333	6	101	6	82	0.943925	9	0.0144081	1
Chr1	111698326	111698631	AluYRa1	-	20	2	15	0.909091	3	9	6	39	0.6	3	0.309091	1
Chr1	111781168	111781477	AluYRa1	+	26	3	10	0.896552	4	27	2	37	0.931034	6	-0.0344828	1
Chr1	111790875	111791176	AluYRa1	+	73	6	23	0.924051	6	24	4	23	0.857143	3	0.0669078	1
Chr1	111798884	111799192	AluYRa1	+	15	0	13	1	2	50	8	12	0.862069	5	0.137931	1
Chr1	111865215	111865524	AluYRa1	-	9	7	19	0.5625	2	2	44	46	0.0434783	4	0.519022	1
Chr1	111939505	111939810	AluYRa1	-	32	4	34	0.888889	6	38	10	38	0.791667	8	0.0972222	1
Chr1	111959383	111959690	AluYRa1	+	0	0	0	NaN	0	24	9	27	0.727273	3	NaN	1
Chr1	112008774	112009082	AluYRa1	-	20	0	2	1	1	38	3	43	0.926829	4	0.0731707	1
Chr1	112151947	112152250	AluYRa1	+	32	3	10	0.914286	3	28	5	57	0.848485	6	0.0658009	1
Chr1	112261823	112262128	AluYRa1	-	70	3	17	0.958904	5	16	1	19	0.941176	2	0.0177276	1
Chr1	112264938	112265244	AluYRa1	+	52	10	36	0.83871	7	14	1	18	0.933333	3	-0.0946237	1
Chr1	112439103	112439439	AluYRa1	-	36	3	9	0.923077	4	9	1	5	0.9	1	0.0230769	1
Chr1	112498309	112498614	AluYRa1	+	42	1	83	0.976744	7	19	3	14	0.863636	2	0.113108	1
Chr1	112566325	112566632	AluYRa1	-	18	8	30	0.692308	4	46	7	27	0.867925	4	-0.175617	1
Chr1	112570890	112571198	AluYRa1	+	29	14	77	0.674419	6	14	2	47	0.875	4	-0.200581	1
Chr1	112579697	112580003	AluYRa1	+	25	3	52	0.892857	4	53	2	39	0.963636	6	-0.0707792	1
Chr1	112659857	112660161	AluYRa1	-	24	4	26	0.857143	3	8	3	25	0.727273	2	0.12987	1
Chr1	112669278	112669585	AluYRa1	+	41	9	10	0.82	3	26	6	8	0.8125	2	0.0075	1
Chr1	112695473	112695785	AluYRa1	-	10	0	10	1	1	28	1	31	0.965517	3	0.0344828	1
Chr1	112738991	112739310	AluYRa1	-	46	4	46	0.92	8	24	3	27	0.888889	6	0.0311111	1
Chr1	112782548	112782853	AluYRa1	-	15	0	19	1	2	25	5	8	0.833333	2	0.166667	1
Chr1	112965010	112965315	AluYRa1	-	48	3	12	0.941176	3	52	2	30	0.962963	4	-0.0217865	1
Chr1	113120980	113121286	AluYRa1	-	47	3	16	0.94	4	43	3	17	0.934783	3	0.00521739	1
Chr1	113141364	113141672	AluYRa1	-	38	4	35	0.904762	7	23	6	15	0.793103	4	0.111658	1
Chr1	113675894	113676205	AluYRa1	-	11	5	20	0.6875	2	75	4	47	0.949367	8	-0.261867	1
Chr1	113772085	113772391	AluYRa1	-	37	2	6	0.948718	3	40	0	35	1	5	-0.0512821	1
Chr1	113804542	113804851	AluYRa1	+	16	2	22	0.888889	2	53	7	68	0.883333	7	0.00555556	1
Chr1	113826467	113826771	AluYRa1	-	1	2	18	0.333333	1	23	2	34	0.92	3	-0.586667	1
Chr1	113960554	113960863	AluYRa1	+	47	0	4	1	3	31	1	19	0.96875	3	0.03125	1
Chr1	113960873	113961176	AluYRa1	+	33	0	16	1	4	10	0	32	1	3	0	1
Chr1	114007372	114007675	AluYRa1	+	22	0	7	1	2	36	0	28	1	4	0	1
Chr1	114085769	114086076	AluYRa1	-	23	0	25	1	4	0	0	0	NaN	0	NaN	1
Chr1	114096230	114096535	AluYRa1	-	41	0	44	1	5	17	2	39	0.894737	4	0.105263	1
Chr1	114111955	114112264	AluYRa1	-	24	1	55	0.96	4	82	2	56	0.97619	7	-0.0161905	1
Chr1	114128163	114128469	AluYRa1	-	30	1	35	0.967742	4	13	7	40	0.65	3	0.317742	1
Chr1	114139584	114139889	AluYRa1	-	11	14	29	0.44	3	17	4	21	0.809524	2	-0.369524	1
Chr1	114153186	114153493	AluYRa1	+	29	0	23	1	4	22	1	33	0.956522	4	0.0434783	1
Chr1	114205098	114205400	AluYRa1	+	15	1	1	0.9375	1	25	13	18	0.657895	4	0.279605	1
Chr1	114485786	114486095	AluYRa1	+	21	1	16	0.954545	2	61	1	33	0.983871	5	-0.0293255	1
Chr1	114502053	114502362	AluYRa1	+	36	9	23	0.8	5	29	5	48	0.852941	6	-0.0529412	1
Chr1	114503782	114504091	AluYRa1	+	40	10	50	0.8	5	45	18	77	0.714286	7	0.0857143	1
Chr1	114542275	114542584	AluYRa1	-	84	4	38	0.954545	6	88	3	35	0.967033	6	-0.0124875	1
Chr1	114586621	114586929	AluYRa1	+	28	0	6	1	2	46	0	22	1	4	0	1
Chr1	114587776	114588099	AluYRa1	+	26	5	20	0.83871	3	47	0	91	1	6	-0.16129	1
Chr1	114683463	114683767	AluYRa1	+	29	5	38	0.852941	4	59	2	47	0.967213	6	-0.114272	1
Chr1	114684639	114684950	AluYRa1	-	41	3	46	0.931818	5	29	1	60	0.966667	5	-0.0348485	1
Chr1	114709060	114709362	AluYRa1	-	36	2	34	0.947368	4	70	6	49	0.921053	7	0.0263158	1
Chr1	114931769	114932075	AluYRa1	+	11	0	6	1	1	56	1	45	0.982456	6	0.0175439	1
Chr1	114947402	114947708	AluYRa1	+	25	0	11	1	2	0	2	9	0	1	1	1
Chr1	114976062	114976366	AluYRa1	+	38	3	60	0.926829	6	21	3	14	0.875	2	0.0518293	1
Chr1	114982238	114982549	AluYRa1	+	14	0	28	1	2	31	1	61	0.96875	5	0.03125	1
Chr1	114983206	114983512	AluYRa1	+	0	1	20	0	1	78	3	24	0.962963	5	-0.962963	1
Chr1	114990903	114991212	AluYRa1	-	6	4	11	0.6	1	73	3	50	0.960526	6	-0.360526	1
Chr1	114994298	114994599	AluYRa1	+	17	0	1	1	1	38	11	19	0.77551	6	0.22449	1
Chr1	115015079	115015382	AluYRa1	-	37	0	11	1	3	81	0	32	1	8	0	1
Chr1	115047087	115047425	AluYRa1	+	38	12	58	0.76	6	54	13	61	0.80597	8	-0.0459701	1
Chr1	115062315	115062631	AluYRa1	-	23	4	22	0.851852	3	12	0	7	1	1	-0.148148	1
Chr1	115075306	115075607	AluYRa1	+	27	1	26	0.964286	3	23	3	46	0.884615	4	0.0796703	1
Chr1	115077999	115078305	AluYRa1	-	40	4	46	0.909091	5	63	0	45	1	6	-0.0909091	1
Chr1	115096338	115096643	AluYRa1	-	0	0	13	NaN	1	7	0	19	1	2	NaN	1
Chr1	115099125	115099437	AluYRa1	+	20	1	36	0.952381	3	52	7	41	0.881356	5	0.071025	1
Chr1	115106700	115107012	AluYRa1	-	22	5	21	0.814815	3	30	2	38	0.9375	5	-0.122685	1
Chr1	115109257	115109565	AluYRa1	-	27	0	39	1	3	61	0	49	1	5	0	1
Chr1	115123885	115124189	AluYRa1	+	2	0	14	1	1	25	0	7	1	2	0	1
Chr1	115171379	115171687	AluYRa1	+	30	3	24	0.909091	3	40	9	21	0.816327	4	0.0927644	1
Chr1	115178925	115179231	AluYRa1	-	68	3	17	0.957746	4	27	0	25	1	3	-0.0422535	1
Chr1	115221541	115221844	AluYRa1	-	12	1	21	0.923077	2	55	0	30	1	5	-0.0769231	1
Chr1	115569357	115569663	AluYRa1	+	36	5	16	0.878049	4	45	0	9	1	3	-0.121951	1
Chr1	115623843	115624149	AluYRa1	-	42	2	16	0.954545	5	35	5	8	0.875	4	0.0795455	1
Chr1	115712549	115712857	AluYRa1	+	40	3	42	0.930233	5	43	21	21	0.671875	5	0.258358	1
Chr1	115735533	115741683	L1_RS2	+	95	14	35	0.87156	7	207	56	90	0.787072	11	0.0844874	1
Chr1	115977964	115978273	AluYRa1	+	28	2	24	0.933333	3	27	0	9	1	2	-0.0666667	1
Chr1	116138007	116138314	AluYRa1	-	24	0	14	1	3	32	5	35	0.864865	4	0.135135	1
Chr1	116268513	116268825	AluYRa1	+	54	4	70	0.931034	8	36	1	19	0.972973	4	-0.0419385	1
Chr1	116380753	116381061	AluYRa1	-	12	4	20	0.75	2	4	0	14	1	1	-0.25	1
Chr1	116448270	116448575	AluYRa1	+	26	17	14	0.604651	3	43	0	52	1	5	-0.395349	1
Chr1	116575490	116581650	L1PA5	-	138	18	116	0.884615	11	84	24	96	0.777778	8	0.106838	1
Chr1	116719762	116720072	AluYRa1	+	24	0	39	1	3	60	1	23	0.983607	4	0.0163934	1
Chr1	116967944	116968259	AluYRa1	+	41	5	34	0.891304	5	16	5	11	0.761905	2	0.1294	1
Chr1	117009823	117010128	AluYRa1	+	25	0	9	1	2	30	2	36	0.9375	4	0.0625	1
Chr1	117040735	117041048	AluYRa1	-	99	6	49	0.942857	7	44	2	20	0.956522	3	-0.0136646	1
Chr1	117064039	117064343	AluYRa1	+	7	0	31	1	2	50	5	50	0.909091	6	0.0909091	1
Chr1	117077796	117078098	AluYRa1	+	69	2	29	0.971831	5	14	1	5	0.933333	1	0.0384977	1
Chr1	117250230	117250531	AluYRa1	-	9	1	26	0.9	2	18	6	102	0.75	7	0.15	1
Chr1	117409173	117409474	AluYRa1	-	23	10	9	0.69697	4	36	10	32	0.782609	7	-0.085639	1
Chr1	117486353	117486662	AluYRa1	+	25	0	9	1	2	69	13	34	0.841463	7	0.158537	1
Chr1	117503317	117503620	AluYRa1	-	17	3	16	0.85	3	15	3	13	0.833333	3	0.0166667	1
Chr1	117770708	117771017	AluYRa1	+	40	1	31	0.97561	4	70	0	45	1	8	-0.0243902	1
Chr1	117795759	117796079	AluYRa1	-	60	0	28	1	4	24	0	42	1	3	0	1
Chr1	117886230	117886541	AluYRa1	-	4	0	17	1	1	42	2	43	0.954545	5	0.0454545	1
Chr1	117977187	117977497	AluYRa1	+	55	0	27	1	6	28	11	41	0.717949	5	0.282051	1
Chr1	117989745	117990059	AluYRa1	-	12	1	8	0.923077	1	24	0	22	1	3	-0.0769231	1
Chr1	118039188	118039490	AluYRa1	-	26	3	15	0.896552	4	58	8	70	0.878788	8	0.0177638	1
Chr1	118127003	118127310	AluYRa1	+	11	1	8	0.916667	1	0	0	0	NaN	0	NaN	1
Chr1	118218659	118218965	AluYRa1	-	5	1	13	0.833333	1	54	0	60	1	6	-0.166667	1
Chr1	118245435	118245736	AluYRa1	-	79	3	72	0.963415	7	35	0	9	1	2	-0.0365854	1
Chr1	118311361	118311670	AluYRa1	+	0	0	0	NaN	0	29	3	32	0.90625	4	NaN	1
Chr1	118370722	118371030	AluYRa1	+	28	1	11	0.965517	2	60	11	49	0.84507	6	0.120447	1
Chr1	118378545	118378858	AluYRa1	-	32	4	26	0.888889	4	43	12	27	0.781818	6	0.107071	1
Chr1	118416203	118416514	AluYRa1	-	12	4	29	0.75	4	22	16	21	0.578947	5	0.171053	1
Chr1	118454044	118454347	AluYRa1	-	21	4	17	0.84	2	47	8	26	0.854545	4	-0.0145455	1
Chr1	118496122	118496454	AluYRa1	-	23	0	10	1	3	32	7	46	0.820513	6	0.179487	1
Chr1	118543019	118543328	AluYRa1	-	46	0	22	1	4	45	8	83	0.849057	8	0.150943	1
Chr1	118578417	118578727	AluYRa1	+	40	1	13	0.97561	3	19	6	29	0.76	3	0.21561	1
Chr1	118618400	118618708	AluYRa1	-	33	5	52	0.868421	5	31	11	66	0.738095	6	0.130326	1
Chr1	118707166	118707485	AluYRa1	+	48	8	34	0.857143	5	36	5	49	0.878049	5	-0.0209059	1
Chr1	118752782	118753087	AluYRa1	-	5	7	4	0.416667	1	49	13	66	0.790323	8	-0.373656	1
Chr1	118778266	118778569	AluYRa1	+	42	6	15	0.875	3	74	19	75	0.795699	8	0.0793011	1
Chr1	118781756	118782072	AluYRa1	-	28	1	13	0.965517	4	30	10	28	0.75	4	0.215517	1
Chr1	118799568	118805720	L1_RS2	-	105	2	67	0.981308	6	126	30	57	0.807692	4	0.173616	0.0198357
Chr1	118876283	118876584	AluYRa1	-	73	1	37	0.986486	6	40	4	28	0.909091	4	0.0773956	1
Chr1	118887538	118887845	AluYRa1	+	27	0	0	1	3	0	0	0	NaN	0	NaN	1
Chr1	118888797	118889106	AluYRa1	+	16	1	3	0.941176	1	0	0	0	NaN	0	NaN	1
Chr1	118914772	118915084	AluYRa1	-	30	0	9	1	3	10	4	25	0.714286	3	0.285714	1
Chr1	118931281	118931590	AluYRa1	+	21	8	78	0.724138	6	20	9	55	0.689655	4	0.0344828	1
Chr1	119007206	119007542	AluYRa1	+	38	0	19	1	3	53	7	53	0.883333	6	0.116667	1
Chr1	119044262	119044564	AluYRa1	-	26	1	18	0.962963	3	86	1	39	0.988506	6	-0.0255428	1
Chr1	119197062	119197405	AluYRa1	-	44	4	26	0.916667	6	41	6	45	0.87234	6	0.0443262	1
Chr1	119206341	119206657	AluYRa1	-	29	2	29	0.935484	4	17	0	13	1	2	-0.0645161	1
Chr1	119263554	119263880	AluYRa1	-	13	0	3	1	1	27	19	41	0.586957	6	0.413043	1
Chr1	119395558	119395866	AluYRa1	+	20	2	23	0.909091	3	9	0	6	1	1	-0.0909091	1
Chr1	119425616	119425919	AluYRa1	+	14	0	19	1	3	10	0	6	1	1	0	1
Chr1	119538262	119544408	L1_RS2	-	35	8	12	0.813953	4	134	67	94	0.666667	7	0.147287	1
Chr1	119558292	119558594	AluYRa1	+	58	10	42	0.852941	5	65	19	80	0.77381	8	0.0791317	1
Chr1	119593106	119593427	AluYRa1	-	11	1	2	0.916667	1	23	3	30	0.884615	4	0.0320513	1
Chr1	119604539	119604842	AluYRa1	-	19	0	18	1	4	26	9	25	0.742857	5	0.257143	1
Chr1	119609005	119609315	AluYRa1	+	14	0	2	1	1	41	4	19	0.911111	4	0.0888889	1
Chr1	119917001	119917311	AluYRa1	+	25	0	15	1	2	43	1	16	0.977273	3	0.0227273	1
Chr1	119965250	119965560	AluYRa1	-	42	1	8	0.976744	3	54	9	32	0.857143	5	0.119601	1
Chr1	120109702	120110019	AluYRa1	+	24	0	4	1	2	33	2	24	0.942857	5	0.0571429	1
Chr1	120176378	120182510	L1_RS2	+	102	13	63	0.886957	7	306	87	186	0.778626	12	0.108331	1
Chr1	120231155	120231461	AluYRa1	+	53	1	34	0.981481	4	5	4	13	0.555556	1	0.425926	1
Chr1	120319043	120319354	AluYRa1	+	31	5	12	0.861111	4	54	3	15	0.947368	6	-0.0862573	1
Chr1	120400399	120400716	AluYRa1	-	25	1	18	0.961538	3	39	5	10	0.886364	3	0.0751748	1
Chr1	120465507	120465852	AluYRa1	-	11	0	25	1	3	9	5	10	0.642857	2	0.357143	1
Chr1	120485179	120491318	L1_RS2	+	147	18	106	0.890909	6	169	35	111	0.828431	7	0.0624777	1
Chr1	120560706	120561016	AluYRa1	+	37	3	30	0.925	4	28	7	70	0.8	5	0.125	1
Chr1	120699317	120699618	AluYRa1	-	25	5	28	0.833333	4	29	7	24	0.805556	4	0.0277778	1
Chr1	120725823	120726125	AluYRa1	+	0	6	16	0	2	21	12	45	0.636364	6	-0.636364	1
Chr1	120760557	120760872	AluYRa1	+	15	0	4	1	1	43	8	63	0.843137	6	0.156863	1
Chr1	120808631	120808937	AluYRa1	-	34	0	30	1	4	33	1	14	0.970588	3	0.0294118	1
Chr1	120898674	120898982	AluYRa1	+	39	18	33	0.684211	5	53	5	32	0.913793	5	-0.229583	1
Chr1	120991304	120991618	AluYRa1	-	18	2	31	0.9	3	40	13	114	0.754717	10	0.145283	1
Chr1	121026413	121026721	AluYRa1	+	46	1	37	0.978723	4	14	20	8	0.411765	2	0.566959	1
Chr1	121111665	121111974	AluYRa1	-	24	2	34	0.923077	4	72	7	54	0.911392	9	0.0116845	1
Chr1	121185757	121186075	AluYRa1	+	0	0	0	NaN	0	35	17	33	0.673077	5	NaN	1
Chr1	121204261	121204564	AluYRa1	-	67	3	30	0.957143	6	31	5	32	0.861111	4	0.0960317	1
Chr1	121218333	121218658	AluYRa1	-	21	4	23	0.84	3	22	0	10	1	2	-0.16	1
Chr1	121327765	121328074	AluYRa1	+	14	0	3	1	1	17	0	0	1	1	0	1
Chr1	121349054	121349358	AluYRa1	+	36	6	30	0.857143	5	70	5	37	0.933333	7	-0.0761905	1
Chr1	121468754	121474908	L1_RS2	-	145	29	70	0.833333	5	35	9	20	0.795455	3	0.0378788	1
Chr1	121565295	121571443	L1_RS2	-	140	41	122	0.773481	7	145	46	123	0.759162	8	0.0143184	1
Chr1	121635852	121636165	AluYRa1	+	27	1	14	0.964286	3	37	6	37	0.860465	6	0.103821	1
Chr1	121851405	121851714	AluYRa1	+	36	1	48	0.972973	5	42	4	29	0.913043	5	0.0599295	1
Chr1	121977497	121977828	AluYRa1	+	47	0	29	1	4	64	2	10	0.969697	4	0.030303	1
Chr1	122031158	122031468	AluYRa1	+	31	1	45	0.96875	5	30	0	18	1	3	-0.03125	1
Chr1	122183540	122183842	AluYRa1	-	12	0	28	1	2	52	3	25	0.945455	4	0.0545455	1
Chr1	122210490	122210798	AluYRa1	+	130	7	102	0.948905	11	78	17	37	0.821053	6	0.127852	1
Chr1	122354787	122355096	AluYRa1	-	17	0	4	1	1	43	0	20	1	3	0	1
Chr1	122369504	122369805	AluYRa1	+	21	1	16	0.954545	3	46	9	13	0.836364	4	0.118182	1
Chr1	122428070	122428378	AluYRa1	+	8	7	6	0.533333	1	32	1	51	0.969697	4	-0.436364	1
Chr1	122652873	122653187	AluYRa1	-	44	0	16	1	4	46	9	13	0.836364	5	0.163636	1
Chr1	122776919	122777227	AluYRa1	+	28	2	62	0.933333	4	21	3	68	0.875	4	0.0583333	1
Chr1	123155654	123155955	AluYRa1	-	14	0	30	1	2	74	19	83	0.795699	8	0.204301	1
Chr1	123171171	123171475	AluYRa1	+	3	4	8	0.428571	1	27	2	36	0.931034	5	-0.502463	1
Chr1	123469154	123469455	AluYRa1	+	13	0	4	1	1	38	11	36	0.77551	5	0.22449	1
Chr1	123607011	123607316	AluYRa1	+	62	4	53	0.939394	8	35	12	38	0.744681	5	0.194713	1
Chr1	123696154	123696463	AluYRa1	+	8	3	11	0.727273	2	27	9	60	0.75	8	-0.0227273	1
Chr1	123756548	123756858	AluYRa1	-	27	1	32	0.964286	3	56	3	21	0.949153	4	0.0151332	1
Chr1	123783991	123784321	AluYRa1	-	40	0	24	1	4	80	2	62	0.97561	9	0.0243902	1
Chr1	123851631	123851941	AluYRa1	-	43	8	39	0.843137	5	140	2	56	0.985915	11	-0.142778	1
Chr1	123865324	123865635	AluYRa1	+	22	0	54	1	4	71	2	60	0.972603	7	0.0273973	1
Chr1	123867956	123868265	AluYRa1	-	48	3	65	0.941176	6	109	7	90	0.939655	10	0.0015213	1
Chr1	124106715	124107024	AluYRa1	+	46	2	85	0.958333	7	50	6	39	0.892857	5	0.0654762	1
Chr1	124132399	124132713	AluYRa1	+	34	2	27	0.944444	3	40	4	61	0.909091	5	0.0353535	1
[truncated: 45,879 more rows]
